# Supplementary material for: Complementation contributes to transcriptome complexity in maize (Zea mays L.) hybrids relative to their inbred parents
Source: HighWire-hosted journal article supplement (doi:10.1101/gr.138461.112), 2012-10-19
Supplement: TableS1.pdf [file TableS1.pdf]

**Table S1:** Overview of lane distribution on flow cells, biological replication, mRNAseq output and mapping results. The total reads of each sequenced sample have been mapped onto the filtered gene set (FGS) of *Zea mays* L.. Only uniquely mapping reads have been further considered. Stacked PCR artifacts (overlapping reads with the same start and end point) have been removed. Using previously identified single nucleotide polymorphisms (SNPs) B73 and Mo17 alleles were distinguished.

| Flow cell | Lane | Replicate | Genotype | Number of reads |                                        |                                                       |                                                           |                              |         |
|-----------|------|-----------|----------|-----------------|----------------------------------------|-------------------------------------------------------|-----------------------------------------------------------|------------------------------|---------|
|           |      |           |          | Total           | Uniquely mapped on genome <sup>a</sup> | Uniquely mapped on genome without stacks <sup>b</sup> | Uniquely mapped without stacks mapped on FGS <sup>c</sup> | Allele-specific <sup>d</sup> |         |
|           |      |           |          |                 |                                        |                                                       |                                                           | B73                          | Mo17    |
| 1         | 1    | 1         | B73      | 33,234,526      | 21,328,227                             | 12,267,068                                            | 11,570,430                                                | 872,471                      | 4,909   |
|           | 2    |           | Mo17     | 35,955,236      | 19,118,497                             | 10,868,356                                            | 10,029,386                                                | 9,871                        | 594,869 |
|           | 3    |           | B73xMo17 | 32,782,191      | 19,055,049                             | 11,718,448                                            | 10,954,923                                                | 456,036                      | 319,549 |
|           | 4    |           | Mo17xB73 | 36,445,647      | 22,259,222                             | 12,204,641                                            | 11,388,051                                                | 547,118                      | 418,242 |
|           | 7    | 2         | B73      | 32,098,456      | 20,899,929                             | 10,770,070                                            | 10,080,543                                                | 813,952                      | 3,492   |
|           | 8    |           | Mo17     | 31,288,481      | 17,517,471                             | 9,795,846                                             | 9,011,261                                                 | 7,850                        | 570,795 |
|           | 6    |           | B73xMo17 | 34,756,464      | 20,539,186                             | 11,049,208                                            | 10,203,856                                                | 463,443                      | 343,477 |
|           | 5    |           | Mo17xB73 | 32,772,571      | 21,309,187                             | 10,834,708                                            | 10,039,140                                                | 452,546                      | 332,658 |
| 2         | 2    | 3         | B73      | 32,232,074      | 21,809,433                             | 9,450,478                                             | 9,028,832                                                 | 783,690                      | 1,740   |
|           | 1    |           | Mo17     | 34,882,886      | 20,767,234                             | 10,881,671                                            | 10,284,321                                                | 6,687                        | 683,788 |
|           | 3    |           | B73xMo17 | 36,204,588      | 23,202,047                             | 10,798,241                                            | 9,844,378                                                 | 506,718                      | 386,066 |
|           | 4    |           | Mo17xB73 | 36,142,580      | 22,702,689                             | 10,830,826                                            | 10,265,593                                                | 502,743                      | 384,146 |
|           | 8    | 4         | B73      | 32,330,408      | 21,862,109                             | 10,089,830                                            | 9,658,141                                                 | 842,557                      | 2,062   |
|           | 7    |           | Mo17     | 34,413,964      | 22,899,946                             | 10,276,388                                            | 9,645,122                                                 | 6,642                        | 662,850 |
|           | 5    |           | B73xMo17 | 36,299,499      | 22,203,710                             | 10,344,764                                            | 9,844,378                                                 | 500,527                      | 387,362 |
|           | 6    |           | Mo17xB73 | 36,698,267      | 21,671,494                             | 10,392,346                                            | 9,851,114                                                 | 500,350                      | 384,599 |

<sup>a</sup> mapped to the reference genome of B73 (Schnable *et al.*, 2009)

<sup>b</sup> after removal of PCR artifacts (stacked reads)

<sup>c</sup> mapped to the gene models of the filtered gene set (FGS) of *Zea mays* (Release 5b.60) allowing 2 mismatches

<sup>d</sup> using 4 million single nucleotide polymorphisms (SNPs)
