# Supplementary material for: Complementation contributes to transcriptome complexity in maize (Zea mays L.) hybrids relative to their inbred parents
Source: HighWire-hosted journal article supplement (doi:10.1101/gr.138461.112), 2012-10-19
Supplement: TableS2.pdf [file TableS2.pdf]

**Table S2:** Genes showing unequal allelic expression levels (B73 allele  $\neq$  Mo17 allele) in the hybrids. All genes for which the null hypothesis was dismissed ( $m_1$ ) and those which remain after applying a false discovery rate (FDR) of 5% depicted. In addition, the resulting genes are classified according to the distribution of alleles. Due to the mapping bias towards B73 only those genes showing a higher expression of the Mo17 allele are considered. The number of genes expected to overlap between the reciprocal hybrids B73xMo17 and Mo17xB73 as well as the observed overlap are shown.

| Genotype | Criteria                     | $m_1$  | FDR 5% |         |            |         |            |                                                |
|----------|------------------------------|--------|--------|---------|------------|---------|------------|------------------------------------------------|
|          |                              |        | Total  | Overlap | B73 > Mo17 | Overlap | B73 < Mo17 | Overlap <sup>a</sup><br>expected      observed |
|          |                              |        |        |         |            |         |            |                                                |
| B73xMo17 | (b/m) <sub>BM</sub> $\neq$ 1 | 10,463 | 8,306  | 6,530   | 6,826      | 5,501   | 1,480      | 75      1,020*                                 |
| Mo17xB73 | (b/m) <sub>MB</sub> $\neq$ 1 | 10,463 | 8,259  |         | 6,710      |         | 1,549      |                                                |

<sup>a</sup> Expected values were calculated as (# non-additive genes in B73x Mo17 \* # non-additive genes in Mo17xB73) / # all expressed genes; # of all expressed genes is the sum of classes 1-9 from Table 1; expected and observed overlap values were compared using a Chi<sup>2</sup> test for independence; significant differences between expected and observed overlap values are indicated by \* ( $p \leq 0.01$ ); Y: yes, N: no
