# Supplementary material for: Complementation contributes to transcriptome complexity in maize (Zea mays L.) hybrids relative to their inbred parents
Source: HighWire-hosted journal article supplement (doi:10.1101/gr.138461.112), 2012-10-19
Supplement: TableS3.xlsx [file TableS3.xlsx]

## Sheet: Tabelle1
	Table 1													Figure 1													Table 2									Table S2
Gene	MxB class	BxM class	overlapping class	midparent_BxM.qval	non-additivity in BxM?	classification of non-additive genes BxM	midparent_MxB.qval	non-additivity in MxB?	classification of non-additive genes MxB	overlapping non-additivity between BxM MxB	overlapping classification between BxM and MxB		X_12.qval	B≠M?	X_13.qval	B≠BM?	X_14.qval	B≠MB?	X_23.qval	M≠BM?	X_24.qval	M≠MB?	X_34.qval	BM≠MB?		Parent_Ratio_BxM.qval	q1: BB/MM≠BBM/MBM	q1+non-additivity in BxM?	Parent_Ratio_MxB.qval	q1: BB/MM≠BMB/MMB	q1+non-additivity in MxB?	q1overlap between BxM and MxB	q1+non-additivity overlap between BxM and MxB?		M_vs_B_in_BxM.qval	q2: BBM≠MBM	M_vs_B_in_MxB.qval	q2: BMB≠MMB	q2 overlap between BxM an MxB
AC147602.5_FG004	NA	NA	NA	NA	0		NA	0		0			NA	0	NA	0	NA	0	NA	0	NA	0	NA	0		NA	0	0	NA	0	0	0	0		NA	0	NA	0	0
AC148152.3_FG001	1	3		0.0949661	0		0.26657	0		0			5.03492e-07	1	0.000358777	1	0.00113123	1	0.100324	0	0.047148	1	0.655119	0		NA	0	0	NA	0	0	0	0		NA	0	NA	0	0
AC148152.3_FG005	8	4		0.218442	0		0.00155554	1	8	0			0.290466	0	0.197251	0	0.00225199	1	0.109047	0	0.00233848	1	0.320964	0		0.704504	0	0	0.717694	0	0	0	0		0.259549	0	0.240856	0	0
AC148152.3_FG006	0	2		0.370137	0		0.612229	0		0			0.0121323	1	0.579992	0	0.282893	0	0.0250026	1	0.0965196	0	0.634437	0		NA	0	0	NA	0	0	0	0		NA	0	NA	0	0
AC148152.3_FG008	2	2	2	0.0881906	0		0.00185046	1	2	0			2.67771e-16	1	0.0985938	0	0.399308	0	2.49381e-15	1	1.60185e-16	1	0.361754	0		0.246908	0	0	0.138116	0	0	0	0		0.339936	0	0.20716	0	0
AC148167.6_FG001	2	3		0.465063	0		0.309527	0		0			0.00113531	1	0.048371	1	0.376594	0	0.225604	0	0.00952037	1	0.290392	0		0.113727	0	0	0.401987	0	0	0	0		7.45843e-05	1	0.00790455	1	1
AC149475.2_FG002	3	5		0.00288063	1	5	0.0424175	1	3	1			0.0124783	1	0.000110986	1	0.00142164	1	0.0449253	1	0.221717	0	0.601086	0		0.166086	0	0	0.0196385	1	1	0	0		0.0278287	1	0.000341229	1	1
AC149475.2_FG003	2	0		0.461521	0		0.119504	0		0			0.00569227	1	0.0784365	0	0.00326317	1	0.299857	0	0.377719	0	0.523671	0		0.597182	0	0	0.118839	0	0	0	0		2.64389e-16	1	3.15104e-20	1	1
AC149475.2_FG005	3	0		0.499105	0		0.141867	0		0			0.0114107	1	0.447137	0	0.00659838	1	0.0675053	0	0.369287	0	0.191513	0		0.0357983	1	0	0.0758273	0	0	0	0		6.78318e-05	1	0.000399779	1	1
AC149475.2_FG007	2	0		0.470951	0		0.345886	0		0			0.0096415	1	0.100939	0	0.443	0	0.315951	0	0.0320981	1	0.326142	0		0.514984	0	0	0.627106	0	0	0	0		0.0441221	1	0.134693	0	0
AC149810.2_FG003	NA	NA	NA	NA	0		NA	0		0			NA	0	NA	0	NA	0	NA	0	NA	0	NA	0		NA	0	0	NA	0	0	0	0		NA	0	NA	0	0
AC149810.2_FG004	NA	NA	NA	NA	0		NA	0		0			NA	0	NA	0	NA	0	NA	0	NA	0	NA	0		NA	0	0	NA	0	0	0	0		NA	0	NA	0	0
AC149810.2_FG008	0	3		0.369271	0		0.662791	0		0			0.00267614	1	0.455027	0	0.14406	0	0.0210742	1	0.130098	0	0.60684	0		0.725154	0	0	0.42483	0	0	0	0		0.0297029	1	0.258771	0	0
AC149818.2_FG001	3	1		0.640022	0		0.578248	0		0			1.86408e-06	1	0.0320013	1	0.00788446	1	0.0232154	1	0.0688397	0	0.715945	0		NA	0	0	NA	0	0	0	0		NA	0	NA	0	0
AC149818.2_FG004	0	0	0	0.632316	0		0.593221	0		0			0.00327142	1	0.236419	0	0.0678435	0	0.0999706	0	0.269901	0	0.668917	0		NA	0	0	NA	0	0	0	0		NA	0	NA	0	0
AC149818.2_FG005	0	0	0	0.58119	0		0.560458	0		0			0.00639015	1	0.314661	0	0.0639199	0	0.0941659	0	0.34057	0	0.592032	0		0.580027	0	0	0.430979	0	0	0	0		0.282194	0	0.00718952	1	0
AC149818.2_FG006	1	1	1	0.590655	0		0.656608	0		0			1.88824e-20	1	8.54472e-06	1	4.136e-05	1	1.79824e-05	1	2.18629e-06	1	0.688332	0		0.649123	0	0	0.677263	0	0	0	0		0.000371013	1	0.00944012	1	1
AC149818.2_FG007	4	4	4	0.161577	0		0.620878	0		0			0.228184	0	0.112527	0	0.331444	0	0.11553	0	0.487969	0	0.467253	0		0.596384	0	0	0.287145	0	0	0	0		0.1774	0	0.0269265	1	0
AC149818.2_FG008	0	0	0	0.58147	0		0.545637	0		0			0.0151856	1	0.198624	0	0.335225	0	0.250431	0	0.106036	0	0.579991	0		NA	0	0	NA	0	0	0	0		NA	0	NA	0	0
AC149818.2_FG009	6	4		0.63294	0		0.0125758	1	6	0			0.156184	0	0.446292	0	0.0312816	1	0.377328	0	0.00653392	1	0.106963	0		0.509384	0	0	0.528366	0	0	0	0		0.0269208	1	0.00333746	1	1
AC149828.2_FG002	3	0		0.476695	0		0.439059	0		0			0.0093825	1	0.102796	0	0.0443234	1	0.310377	0	0.441238	0	0.74828	0		0.673574	0	0	0.698551	0	0	0	0		0.291385	0	0.23533	0	0
AC149828.2_FG004	0	3		0.414723	0		0.685531	0		0			0.00174768	1	0.410844	0	0.121835	0	0.0222054	1	0.132582	0	0.615328	0		NA	0	0	NA	0	0	0	0		NA	0	NA	0	0
AC149828.2_FG005	NA	NA	NA	NA	0		NA	0		0			NA	0	NA	0	NA	0	NA	0	NA	0	NA	0		NA	0	0	NA	0	0	0	0		NA	0	NA	0	0
AC149829.2_FG002	0	0	0	0.0679241	0		0.0513	0		0			0.0863004	0	0.17534	0	0.0945897	0	0.00859308	1	0.0087632	1	0.764327	0		0.565692	0	0	0.297245	0	0	0	0		0.0126318	1	0.000559642	1	1
AC149829.2_FG003	3	2		0.433907	0		0.101289	0		0			4.49909e-06	1	0.00499033	1	0.335071	0	0.114653	0	0.000120107	1	0.115343	0		0.365769	0	0	0.338343	0	0	0	0		7.18389e-09	1	3.95028e-11	1	1
AC149829.2_FG004	3	0		0.609053	0		0.341357	0		0			0.000457227	1	0.109922	0	0.0124806	1	0.0605878	0	0.275359	0	0.578909	0		0.620751	0	0	0.626387	0	0	0	0		0.0442596	1	0.0153035	1	1
AC149829.2_FG006	0	3		0.528773	0		0.686399	0		0			0.000883048	1	0.283237	0	0.105029	0	0.0350104	1	0.111848	0	0.695258	0		0.741253	0	0	0.698485	0	0	0	0		0.0119079	1	0.0199751	1	1
AC150739.3_FG001	4	4	4	0.286168	0		0.577106	0		0			0.1304	0	0.380537	0	0.226075	0	0.0752104	0	0.512827	0	0.356816	0		0.593639	0	0	0.651067	0	0	0	0		0.136281	0	0.174443	0	0
AC152495.1_FG002	3	2		0.47943	0		0.327671	0		0			1.30467e-06	1	0.00172549	1	0.0870477	0	0.0827633	0	0.00175674	1	0.305002	0		0.458473	0	0	0.51255	0	0	0	0		0.0147026	1	0.00611155	1	1
AC152495.1_FG003	4	4	4	0.604882	0		0.458085	0		0			0.108419	0	0.366838	0	0.130517	0	0.37043	0	0.442089	0	0.663928	0		NA	0	0	NA	0	0	0	0		NA	0	NA	0	0
AC152495.1_FG010	0	0	0	0.594896	0		0.485506	0		0			0.00515503	1	0.240573	0	0.257612	0	0.105052	0	0.0719373	0	0.693696	0		NA	0	0	NA	0	0	0	0		NA	0	NA	0	0
AC152495.1_FG011	NA	NA	NA	NA	0		NA	0		0			NA	0	NA	0	NA	0	NA	0	NA	0	NA	0		NA	0	0	NA	0	0	0	0		NA	0	NA	0	0
AC152495.1_FG012	1	2		0.355788	0		0.646419	0		0			4.68994e-07	1	0.192674	0	0.0311766	1	0.000593157	1	0.00924339	1	0.610588	0		0.759216	0	0	0.583895	0	0	0	0		0.195519	0	0.0307173	1	0
AC152495.1_FG013	NA	NA	NA	NA	0		NA	0		0			NA	0	NA	0	NA	0	NA	0	NA	0	NA	0		NA	0	0	NA	0	0	0	0		NA	0	NA	0	0
AC152495.1_FG015	NA	NA	NA	NA	0		NA	0		0			NA	0	NA	0	NA	0	NA	0	NA	0	NA	0		NA	0	0	NA	0	0	0	0		NA	0	NA	0	0
AC152495.1_FG017	1	1	1	0.0544582	0		0.00261984	1	1	0			6.52987e-11	1	0.000869844	1	0.0160282	1	7.39655e-06	1	3.7382e-07	1	0.490841	0		NA	0	0	NA	0	0	0	0		NA	0	NA	0	0
AC155352.2_FG001	NA	NA	NA	NA	0		NA	0		0			NA	0	NA	0	NA	0	NA	0	NA	0	NA	0		NA	0	0	NA	0	0	0	0		NA	0	NA	0	0
AC155352.2_FG010	4	4	4	0.376429	0		0.599893	0		0			0.0694463	0	0.171093	0	0.397614	0	0.396249	0	0.209902	0	0.460547	0		NA	0	0	NA	0	0	0	0		NA	0	NA	0	0
AC155376.2_FG002	NA	NA	NA	NA	0		NA	0		0			NA	0	NA	0	NA	0	NA	0	NA	0	NA	0		NA	0	0	NA	0	0	0	0		NA	0	NA	0	0
AC155376.2_FG004	0	0	0	0.584308	0		0.611408	0		0			0.00289726	1	0.284637	0	0.198465	0	0.0721031	0	0.0956763	0	0.775451	0		0.379531	0	0	0.670892	0	0	0	0		3.50206e-05	1	0.00297222	1	1
AC155376.2_FG005	1	1	1	0.426481	0		0.535187	0		0			1.7765e-20	1	4.66131e-07	1	0.000186508	1	0.000228022	1	4.55471e-07	1	0.436558	0		NA	0	0	NA	0	0	0	0		NA	0	NA	0	0
AC155377.1_FG001	0	0	0	0.371071	0		0.69717	0		0			0.0303553	1	0.56779	0	0.233454	0	0.0525076	0	0.276275	0	0.56431	0		0.0146306	1	0	0.125976	0	0	0	0		2.96502e-07	1	0.000310194	1	1
AC155377.1_FG002	0	0	0	0.625634	0		0.631111	0		0			0.0479336	1	0.422068	0	0.329745	0	0.20234	0	0.234425	0	0.765718	0		0.732132	0	0	0.694389	0	0	0	0		0.31243	0	0.13095	0	0
AC155390.2_FG002	0	0	0	0.627681	0		0.503265	0		0			0.0262343	1	0.272643	0	0.390722	0	0.247788	0	0.112806	0	0.595915	0		0.472113	0	0	0.37828	0	0	0	0		0.21841	0	0.323772	0	0
AC155434.2_FG001	0	2		0.0380387	1	2	0.355423	0		0			0.0281376	1	0.178765	0	0.410726	0	0.00157542	1	0.0535973	0	0.47087	0		0.706098	0	0	0.734534	0	0	0	0		0.261039	0	0.194201	0	0
AC155434.2_FG003	NA	NA	NA	NA	0		NA	0		0			NA	0	NA	0	NA	0	NA	0	NA	0	NA	0		NA	0	0	NA	0	0	0	0		NA	0	NA	0	0
AC155434.2_FG004	3	2		0.220619	0		0.45428	0		0			3.84405e-08	1	0.228594	0	0.000824713	1	6.68909e-05	1	0.0706857	0	0.21011	0		0.177472	0	0	0.0878472	0	0	0	0		0.401184	0	0.290608	0	0
AC155434.2_FG005	2	2	2	0.60107	0		0.140058	0		0			1.62314e-05	1	0.0277586	1	0.000155474	1	0.0628826	0	0.444296	0	0.411699	0		0.395503	0	0	0.0650909	0	0	0	0		0.192081	0	0.222802	0	0
AC155434.2_FG006	2	2	2	0.0493831	1	2	0.000501757	1	2	1	2		7.6822e-08	1	0.488723	0	0.233637	0	1.81337e-06	1	1.2371e-09	1	0.469234	0		0.10905	0	0	0.161037	0	0	0	0		0.0412745	1	0.0857148	0	0
AC155496.2_FG009	3	0		0.635942	0		0.509679	0		0			0.000887538	1	0.184572	0	0.0287223	1	0.0690683	0	0.273991	0	0.609237	0		0.723153	0	0	0.720285	0	0	0	0		0.025727	1	0.0195306	1	1
AC155610.2_FG007	2	0		0.664777	0		0.000411484	1	2	0			0.000555581	1	0.134037	0	5.18736e-07	1	0.0798144	0	0.0715712	0	0.0189861	1		NA	0	0	NA	0	0	0	0		NA	0	NA	0	0
AC155610.2_FG009	0	0	0	0.611548	0		0.519351	0		0			0.0101872	1	0.196931	0	0.0665176	0	0.212543	0	0.391095	0	0.701334	0		0.487703	0	0	0.577949	0	0	0	0		0.0358272	1	0.0731004	0	0
AC155622.2_FG001	4	4	4	0.581684	0		0.295016	0		0			0.291645	0	0.509786	0	0.151025	0	0.351472	0	0.19356	0	0.385011	0		0.738718	0	0	0.752506	0	0	0	0		1.17526e-15	1	7.44991e-17	1	1
AC155622.2_FG004	4	4	4	0.566211	0		0.651637	0		0			0.0798551	0	0.521336	0	0.347054	0	0.191587	0	0.297934	0	0.753542	0		0.530233	0	0	0.713447	0	0	0	0		0.0258071	1	0.130494	0	0
AC155624.2_FG006	3	3	3	0.24039	0		0.376394	0		0			0.00691675	1	0.0229897	1	0.0280928	1	0.411704	0	0.460822	0	0.721433	0		0.587177	0	0	0.571981	0	0	0	0		0.226104	0	0.222053	0	0
AC155624.2_FG011	1	1	1	0.403812	0		0.641721	0		0			1.69667e-08	1	0.00105921	1	0.0162808	1	0.041829	1	0.00377228	1	0.52354	0		0.394017	0	0	0.340359	0	0	0	0		0.333122	0	0.404965	0	0
AC159612.1_FG007	4	4	4	0.376113	0		0.583551	0		0			0.109479	0	0.47715	0	0.434341	0	0.103603	0	0.259965	0	0.684321	0		0.525609	0	0	0.649604	0	0	0	0		0.0204647	1	0.404965	0	0
AC165171.2_FG002	4	4	4	0.166187	0		0.290379	0		0			0.279489	0	0.129254	0	0.139284	0	0.0868696	0	0.194181	0	0.715015	0		NA	0	0	NA	0	0	0	0		NA	0	NA	0	0
AC165178.2_FG004	4	4	4	0.52679	0		0.527814	0		0			0.122139	0	0.297657	0	0.175088	0	0.417946	0	0.476651	0	0.765584	0		NA	0	0	NA	0	0	0	0		NA	0	NA	0	0
AC166636.1_FG007	4	4	4	0.185423	0		0.551143	0		0			0.132083	0	0.0924088	0	0.424875	0	0.189711	0	0.244144	0	0.262313	0		NA	0	0	NA	0	0	0	0		NA	0	NA	0	0
AC166636.1_FG008	0	0	0	0.453757	0		0.503398	0		0			0.0311987	1	0.145292	0	0.0983181	0	0.386067	0	0.462192	0	0.774164	0		0.398741	0	0	0.727371	0	0	0	0		0.0879153	0	0.302496	0	0
AC166636.1_FG009	4	4	4	0.593664	0		0.469866	0		0			0.216433	0	0.450551	0	0.202482	0	0.414585	0	0.366489	0	0.679616	0		NA	0	0	NA	0	0	0	0		NA	0	NA	0	0
AC177831.3_FG004	0	0	0	0.512882	0		0.519351	0		0			0.0301114	1	0.516867	0	0.410292	0	0.0854925	0	0.101565	0	0.76601	0		NA	0	0	NA	0	0	0	0		NA	0	NA	0	0
AC177833.2_FG001	NA	NA	NA	NA	0		NA	0		0			NA	0	NA	0	NA	0	NA	0	NA	0	NA	0		NA	0	0	NA	0	0	0	0		NA	0	NA	0	0
AC177837.3_FG002	NA	NA	NA	NA	0		NA	0		0			NA	0	NA	0	NA	0	NA	0	NA	0	NA	0		NA	0	0	NA	0	0	0	0		NA	0	NA	0	0
AC177838.2_FG015	3	3	3	0.0610391	0		0.0555343	0		0			0.000230806	1	0.109257	0	0.078446	0	0.00307379	1	0.00401358	1	0.76601	0		NA	0	0	NA	0	0	0	0		NA	0	NA	0	0
AC177844.2_FG003	NA	NA	NA	NA	0		NA	0		0			NA	0	NA	0	NA	0	NA	0	NA	0	NA	0		NA	0	0	NA	0	0	0	0		NA	0	NA	0	0
AC177850.2_FG003	3	1		0.0183605	1	1	0.00486234	1	3	1			6.79265e-12	1	4.41544e-07	1	4.429e-08	1	0.0478506	1	0.122177	0	0.714017	0		0.755065	0	0	0.512011	0	0	0	0		0.00226508	1	0.00530981	1	1
AC177850.2_FG005	4	4	4	0.550965	0		0.50228	0		0			0.165054	0	0.370991	0	0.198041	0	0.413563	0	0.433378	0	0.734256	0		0.481472	0	0	0.741509	0	0	0	0		0.358333	0	0.0773218	0	0
AC177860.4_FG002	NA	NA	NA	NA	0		NA	0		0			NA	0	NA	0	NA	0	NA	0	NA	0	NA	0		NA	0	0	NA	0	0	0	0		NA	0	NA	0	0
AC177890.3_FG005	NA	NA	NA	NA	0		NA	0		0			NA	0	NA	0	NA	0	NA	0	NA	0	NA	0		NA	0	0	NA	0	0	0	0		NA	0	NA	0	0
AC177893.3_FG003	NA	NA	NA	NA	0		NA	0		0			NA	0	NA	0	NA	0	NA	0	NA	0	NA	0		NA	0	0	NA	0	0	0	0		NA	0	NA	0	0
AC177893.3_FG006	NA	NA	NA	NA	0		NA	0		0			NA	0	NA	0	NA	0	NA	0	NA	0	NA	0		NA	0	0	NA	0	0	0	0		NA	0	NA	0	0
AC177897.2_FG002	4	0		0.0830079	0		0.543202	0		0			0.138325	0	0.157968	0	0.419558	0	0.0168095	1	0.248235	0	0.436714	0		0.223364	0	0	0.585913	0	0	0	0		0.00815184	1	0.115173	0	0
AC177897.2_FG022	NA	NA	NA	NA	0		NA	0		0			NA	0	NA	0	NA	0	NA	0	NA	0	NA	0		NA	0	0	NA	0	0	0	0		NA	0	NA	0	0
AC177897.2_FG029	NA	NA	NA	NA	0		NA	0		0			NA	0	NA	0	NA	0	NA	0	NA	0	NA	0		NA	0	0	NA	0	0	0	0		NA	0	NA	0	0
AC177899.2_FG009	4	0		0.0565689	0		0.406323	0		0			0.0775423	0	0.181801	0	0.385496	0	0.00784964	1	0.121528	0	0.50445	0		0.688995	0	0	0.114856	0	0	0	0		0.0153286	1	0.0902045	0	0
AC177899.2_FG012	NA	NA	NA	NA	0		NA	0		0			NA	0	NA	0	NA	0	NA	0	NA	0	NA	0		NA	0	0	NA	0	0	0	0		NA	0	NA	0	0
AC177900.4_FG001	NA	NA	NA	NA	0		NA	0		0			NA	0	NA	0	NA	0	NA	0	NA	0	NA	0		NA	0	0	NA	0	0	0	0		NA	0	NA	0	0
AC177905.2_FG001	NA	NA	NA	NA	0		NA	0		0			NA	0	NA	0	NA	0	NA	0	NA	0	NA	0		NA	0	0	NA	0	0	0	0		NA	0	NA	0	0
AC177905.2_FG003	4	4	4	0.561168	0		0.547646	0		0			0.239182	0	0.528975	0	0.361358	0	0.303485	0	0.334562	0	0.758415	0		NA	0	0	NA	0	0	0	0		NA	0	NA	0	0
AC177908.3_FG002	3	3	3	0.362128	0		0.157012	0		0			0.00295144	1	0.0356336	1	0.00364762	1	0.337045	0	0.452563	0	0.63842	0		0.551388	0	0	0.522549	0	0	0	0		0.385988	0	0.360427	0	0
AC177908.3_FG003	NA	NA	NA	NA	0		NA	0		0			NA	0	NA	0	NA	0	NA	0	NA	0	NA	0		NA	0	0	NA	0	0	0	0		NA	0	NA	0	0
AC177908.3_FG006	NA	NA	NA	NA	0		NA	0		0			NA	0	NA	0	NA	0	NA	0	NA	0	NA	0		NA	0	0	NA	0	0	0	0		NA	0	NA	0	0
AC177911.4_FG005	NA	NA	NA	NA	0		NA	0		0			NA	0	NA	0	NA	0	NA	0	NA	0	NA	0		NA	0	0	NA	0	0	0	0		NA	0	NA	0	0
AC177920.3_FG008	NA	NA	NA	NA	0		NA	0		0			NA	0	NA	0	NA	0	NA	0	NA	0	NA	0		NA	0	0	NA	0	0	0	0		NA	0	NA	0	0
AC177922.2_FG002	NA	NA	NA	NA	0		NA	0		0			NA	0	NA	0	NA	0	NA	0	NA	0	NA	0		NA	0	0	NA	0	0	0	0		NA	0	NA	0	0
AC177924.2_FG001	NA	NA	NA	NA	0		NA	0		0			NA	0	NA	0	NA	0	NA	0	NA	0	NA	0		NA	0	0	NA	0	0	0	0		NA	0	NA	0	0
AC177924.2_FG003	NA	NA	NA	NA	0		NA	0		0			NA	0	NA	0	NA	0	NA	0	NA	0	NA	0		NA	0	0	NA	0	0	0	0		NA	0	NA	0	0
AC177926.2_FG003	4	4	4	0.254371	0		0.50475	0		0			0.238328	0	0.167515	0	0.241133	0	0.151068	0	0.379893	0	0.634401	0		NA	0	0	NA	0	0	0	0		NA	0	NA	0	0
AC177930.2_FG001	NA	NA	NA	NA	0		NA	0		0			NA	0	NA	0	NA	0	NA	0	NA	0	NA	0		NA	0	0	NA	0	0	0	0		NA	0	NA	0	0
AC177930.2_FG002	NA	NA	NA	NA	0		NA	0		0			NA	0	NA	0	NA	0	NA	0	NA	0	NA	0		NA	0	0	NA	0	0	0	0		NA	0	NA	0	0
AC177936.6_FG008	0	0	0	0.553192	0		0.582392	0		0			0.00802366	1	0.378621	0	0.271441	0	0.0785789	0	0.103494	0	0.77649	0		0.457601	0	0	0.0747883	0	0	0	0		0.0975624	0	0.00121374	1	0
AC177941.3_FG001	NA	NA	NA	NA	0		NA	0		0			NA	0	NA	0	NA	0	NA	0	NA	0	NA	0		NA	0	0	NA	0	0	0	0		NA	0	NA	0	0
AC177941.3_FG006	NA	NA	NA	NA	0		NA	0		0			NA	0	NA	0	NA	0	NA	0	NA	0	NA	0		NA	0	0	NA	0	0	0	0		NA	0	NA	0	0
AC177946.2_FG004	4	4	4	0.595656	0		0.44786	0		0			0.0864447	0	0.504782	0	0.118198	0	0.219774	0	0.459733	0	0.518517	0		NA	0	0	NA	0	0	0	0		NA	0	NA	0	0
AC177947.2_FG003	0	0	0	0.436311	0		0.643115	0		0			0.021797	1	0.455505	0	0.198801	0	0.0856409	0	0.221386	0	0.669136	0		NA	0	0	NA	0	0	0	0		NA	0	NA	0	0
AC182105.3_FG006	NA	NA	NA	NA	0		NA	0		0			NA	0	NA	0	NA	0	NA	0	NA	0	NA	0		NA	0	0	NA	0	0	0	0		NA	0	NA	0	0
AC182413.4_FG002	NA	NA	NA	NA	0		NA	0		0			NA	0	NA	0	NA	0	NA	0	NA	0	NA	0		NA	0	0	NA	0	0	0	0		NA	0	NA	0	0
AC182439.4_FG004	NA	NA	NA	NA	0		NA	0		0			NA	0	NA	0	NA	0	NA	0	NA	0	NA	0		NA	0	0	NA	0	0	0	0		NA	0	NA	0	0
AC182482.3_FG003	3	1		0.589339	0		0.0337301	1	3	0			2.33178e-06	1	0.0237196	1	1.42548e-05	1	0.0309942	1	0.484957	0	0.262958	0		0.699108	0	0	0.674701	0	0	0	0		0.000313035	1	0.0100241	1	1
AC182615.4_FG001	NA	NA	NA	NA	0		NA	0		0			NA	0	NA	0	NA	0	NA	0	NA	0	NA	0		NA	0	0	NA	0	0	0	0		NA	0	NA	0	0
AC182617.3_FG001	4	4	4	0.48482	0		0.342423	0		0			0.0686685	0	0.213333	0	0.065521	0	0.421824	0	0.406439	0	0.68779	0		NA	0	0	NA	0	0	0	0		NA	0	NA	0	0
AC182627.2_FG003	NA	NA	NA	NA	0		NA	0		0			NA	0	NA	0	NA	0	NA	0	NA	0	NA	0		NA	0	0	NA	0	0	0	0		NA	0	NA	0	0
AC182831.3_FG004	NA	NA	NA	NA	0		NA	0		0			NA	0	NA	0	NA	0	NA	0	NA	0	NA	0		NA	0	0	NA	0	0	0	0		NA	0	NA	0	0
AC182838.3_FG006	3	3	3	0.00173554	1	3	0.001188	1	3	1	3		1.18757e-07	1	0.206935	0	0.152005	0	6.10731e-06	1	6.48827e-06	1	0.765839	0		0.544971	0	0	0.549197	0	0	0	0		0.157339	0	0.102187	0	0
AC183315.4_FG006	1	1	1	0.310605	0		0.685192	0		0			3.37367e-13	1	2.67098e-06	1	0.000251319	1	0.0220137	1	0.000956302	1	0.492334	0		0.373368	0	0	0.545326	0	0	0	0		7.17567e-05	1	1.07218e-06	1	1
AC183319.3_FG001	3	3	3	0.115317	0		0.160561	0		0			0.021943	1	0.0195045	1	0.0166958	1	0.264474	0	0.377309	0	0.759092	0		0.690242	0	0	0.571063	0	0	0	0		0.075474	0	0.222759	0	0
AC183372.4_FG006	0	3		0.0962102	0		0.689371	0		0			0.00615459	1	0.0158196	1	0.167863	0	0.366635	0	0.111849	0	0.297303	0		NA	0	0	NA	0	0	0	0		NA	0	NA	0	0
AC183412.5_FG005	4	4	4	0.655841	0		0.664481	0		0			0.164713	0	0.507955	0	0.404378	0	0.338248	0	0.387994	0	0.765839	0		NA	0	0	NA	0	0	0	0		NA	0	NA	0	0
AC183413.3_FG006	1	2		0.632241	0		0.536042	0		0			6.85187e-06	1	0.0929275	0	0.0148676	1	0.000693499	1	0.00630594	1	0.60618	0		NA	0	0	NA	0	0	0	0		NA	0	NA	0	0
AC183509.1_FG001	NA	NA	NA	NA	0		NA	0		0			NA	0	NA	0	NA	0	NA	0	NA	0	NA	0		NA	0	0	NA	0	0	0	0		NA	0	NA	0	0
AC183514.3_FG006	4	4	4	0.619414	0		0.652888	0		0			0.152264	0	0.538128	0	0.312387	0	0.289223	0	0.464709	0	0.709593	0		NA	0	0	NA	0	0	0	0		NA	0	NA	0	0
AC183817.2_FG002	NA	NA	NA	NA	0		NA	0		0			NA	0	NA	0	NA	0	NA	0	NA	0	NA	0		NA	0	0	NA	0	0	0	0		NA	0	NA	0	0
AC183888.4_FG006	4	4	4	0.495759	0		0.693346	0		0			0.106172	0	0.56504	0	0.329367	0	0.161846	0	0.370973	0	0.662085	0		NA	0	0	NA	0	0	0	0		NA	0	NA	0	0
AC183888.4_FG008	NA	NA	NA	NA	0		NA	0		0			NA	0	NA	0	NA	0	NA	0	NA	0	NA	0		NA	0	0	NA	0	0	0	0		NA	0	NA	0	0
AC183914.3_FG004	NA	NA	NA	NA	0		NA	0		0			NA	0	NA	0	NA	0	NA	0	NA	0	NA	0		NA	0	0	NA	0	0	0	0		NA	0	NA	0	0
AC183915.4_FG001	4	4	4	0.593859	0		0.309026	0		0			0.0853349	0	0.514696	0	0.253839	0	0.200613	0	0.076757	0	0.535269	0		NA	0	0	NA	0	0	0	0		NA	0	NA	0	0
AC183927.3_FG004	4	4	4	0.659446	0		0.657856	0		0			0.100831	0	0.412004	0	0.345885	0	0.31624	0	0.336153	0	0.746823	0		NA	0	0	NA	0	0	0	0		NA	0	NA	0	0
AC183928.4_FG001	NA	NA	NA	NA	0		NA	0		0			NA	0	NA	0	NA	0	NA	0	NA	0	NA	0		NA	0	0	NA	0	0	0	0		NA	0	NA	0	0
AC183932.3_FG007	3	3	3	0.0280223	1	3	0.308323	0		0			0.0412949	1	0.0038147	1	0.044019	1	0.0916931	0	0.425694	0	0.502219	0		0.458473	0	0	0.260628	0	0	0	0		0.266821	0	0.333007	0	0
AC183938.4_FG011	NA	NA	NA	NA	0		NA	0		0			NA	0	NA	0	NA	0	NA	0	NA	0	NA	0		NA	0	0	NA	0	0	0	0		NA	0	NA	0	0
AC183944.4_FG003	4	4	4	0.434586	0		0.682373	0		0			0.219687	0	0.319774	0	0.385315	0	0.303273	0	0.483078	0	0.635453	0		NA	0	0	NA	0	0	0	0		NA	0	NA	0	0
AC183950.2_FG002	NA	NA	NA	NA	0		NA	0		0			NA	0	NA	0	NA	0	NA	0	NA	0	NA	0		NA	0	0	NA	0	0	0	0		NA	0	NA	0	0
AC183950.2_FG003	2	2	2	0.38507	0		0.635281	0		0			0.00130976	1	0.475316	0	0.0926374	0	0.00365866	1	0.0307056	1	0.462812	0		NA	0	0	NA	0	0	0	0		NA	0	NA	0	0
AC183950.2_FG004	2	0		0.651103	0		0.141513	0		0			0.000518528	1	0.12737	0	0.000836639	1	0.0763536	0	0.48286	0	0.318878	0		0.59345	0	0	0.73031	0	0	0	0		0.114199	0	0.0198964	1	0
AC183950.2_FG005	4	4	4	0.326612	0		0.442644	0		0			0.0883582	0	0.124276	0	0.113812	0	0.31286	0	0.453068	0	0.739619	0		0.339465	0	0	0.160283	0	0	0	0		0.00317106	1	0.0175575	1	1
AC183968.2_FG001	2	3		0.496584	0		0.624526	0		0			0.000506453	1	0.129566	0	0.046286	1	0.0366366	1	0.0849295	0	0.72152	0		0.615268	0	0	0.620482	0	0	0	0		0.114199	0	0.13459	0	0
AC184112.4_FG010	4	4	4	0.465129	0		0.670698	0		0			0.125089	0	0.518659	0	0.311057	0	0.152155	0	0.420892	0	0.597724	0		NA	0	0	NA	0	0	0	0		NA	0	NA	0	0
AC184116.3_FG001	NA	NA	NA	NA	0		NA	0		0			NA	0	NA	0	NA	0	NA	0	NA	0	NA	0		NA	0	0	NA	0	0	0	0		NA	0	NA	0	0
AC184127.3_FG003	NA	NA	NA	NA	0		NA	0		0			NA	0	NA	0	NA	0	NA	0	NA	0	NA	0		NA	0	0	NA	0	0	0	0		NA	0	NA	0	0
AC184130.4_FG005	NA	NA	NA	NA	0		NA	0		0			NA	0	NA	0	NA	0	NA	0	NA	0	NA	0		NA	0	0	NA	0	0	0	0		NA	0	NA	0	0
AC184130.4_FG012	1	1	1	0.0659794	0		0.0450066	1	1	0			1.41857e-22	1	2.63493e-10	1	5.1877e-11	1	0.00106324	1	0.00235601	1	0.759259	0		0.580555	0	0	0.390266	0	0	0	0		0.105721	0	0.349761	0	0
AC184133.3_FG001	1	1	1	0.104308	0		0.0943429	0		0			3.60707e-05	1	0.0039829	1	0.00211256	1	0.0311338	1	0.0499991	1	0.76601	0		NA	0	0	NA	0	0	0	0		NA	0	NA	0	0
AC184164.2_FG004	NA	NA	NA	NA	0		NA	0		0			NA	0	NA	0	NA	0	NA	0	NA	0	NA	0		NA	0	0	NA	0	0	0	0		NA	0	NA	0	0
AC184164.2_FG006	NA	NA	NA	NA	0		NA	0		0			NA	0	NA	0	NA	0	NA	0	NA	0	NA	0		NA	0	0	NA	0	0	0	0		NA	0	NA	0	0
AC184169.3_FG001	4	4	4	0.4514	0		0.576373	0		0			0.139832	0	0.258098	0	0.230896	0	0.359655	0	0.502262	0	0.735149	0		0.570458	0	0	0.473298	0	0	0	0		0.14001	0	0.0664925	0	0
AC184170.4_FG002	3	3	3	0.151144	0		0.258037	0		0			0.0292212	1	0.0395711	1	0.0414823	1	0.293487	0	0.450448	0	0.723976	0		0.649448	0	0	0.730594	0	0	0	0		0.0277594	1	0.194886	0	0
AC184171.4_FG002	NA	NA	NA	NA	0		NA	0		0			NA	0	NA	0	NA	0	NA	0	NA	0	NA	0		NA	0	0	NA	0	0	0	0		NA	0	NA	0	0
AC184172.3_FG001	NA	NA	NA	NA	0		NA	0		0			NA	0	NA	0	NA	0	NA	0	NA	0	NA	0		NA	0	0	NA	0	0	0	0		NA	0	NA	0	0
AC184699.3_FG005	NA	NA	NA	NA	0		NA	0		0			NA	0	NA	0	NA	0	NA	0	NA	0	NA	0		NA	0	0	NA	0	0	0	0		NA	0	NA	0	0
AC184764.3_FG003	NA	NA	NA	NA	0		NA	0		0			NA	0	NA	0	NA	0	NA	0	NA	0	NA	0		NA	0	0	NA	0	0	0	0		NA	0	NA	0	0
AC184764.3_FG006	4	4	4	0.664777	0		0.488834	0		0			0.18878	0	0.511056	0	0.356956	0	0.365115	0	0.261216	0	0.634113	0		NA	0	0	NA	0	0	0	0		NA	0	NA	0	0
AC184765.4_FG005	NA	NA	NA	NA	0		NA	0		0			NA	0	NA	0	NA	0	NA	0	NA	0	NA	0		NA	0	0	NA	0	0	0	0		NA	0	NA	0	0
AC184771.4_FG003	NA	NA	NA	NA	0		NA	0		0			NA	0	NA	0	NA	0	NA	0	NA	0	NA	0		NA	0	0	NA	0	0	0	0		NA	0	NA	0	0
AC184775.2_FG002	NA	NA	NA	NA	0		NA	0		0			NA	0	NA	0	NA	0	NA	0	NA	0	NA	0		NA	0	0	NA	0	0	0	0		NA	0	NA	0	0
AC184788.2_FG001	NA	NA	NA	NA	0		NA	0		0			NA	0	NA	0	NA	0	NA	0	NA	0	NA	0		NA	0	0	NA	0	0	0	0		NA	0	NA	0	0
AC184789.4_FG002	NA	NA	NA	NA	0		NA	0		0			NA	0	NA	0	NA	0	NA	0	NA	0	NA	0		NA	0	0	NA	0	0	0	0		NA	0	NA	0	0
AC184794.2_FG003	0	0	0	0.165464	0		0.26073	0		0			0.0338432	1	0.075627	0	0.0655175	0	0.327668	0	0.488664	0	0.720238	0		NA	0	0	NA	0	0	0	0		NA	0	NA	0	0
AC184831.3_FG003	2	0		0.544878	0		0.479717	0		0			0.00152376	1	0.109193	0	0.0073243	1	0.0647276	0	0.360898	0	0.46666	0		NA	0	0	NA	0	0	0	0		NA	0	NA	0	0
AC184831.3_FG005	NA	NA	NA	NA	0		NA	0		0			NA	0	NA	0	NA	0	NA	0	NA	0	NA	0		NA	0	0	NA	0	0	0	0		NA	0	NA	0	0
AC184831.3_FG008	NA	NA	NA	NA	0		NA	0		0			NA	0	NA	0	NA	0	NA	0	NA	0	NA	0		NA	0	0	NA	0	0	0	0		NA	0	NA	0	0
AC184836.3_FG002	NA	NA	NA	NA	0		NA	0		0			NA	0	NA	0	NA	0	NA	0	NA	0	NA	0		NA	0	0	NA	0	0	0	0		NA	0	NA	0	0
AC184857.2_FG006	NA	NA	NA	NA	0		NA	0		0			NA	0	NA	0	NA	0	NA	0	NA	0	NA	0		NA	0	0	NA	0	0	0	0		NA	0	NA	0	0
AC184871.2_FG009	NA	NA	NA	NA	0		NA	0		0			NA	0	NA	0	NA	0	NA	0	NA	0	NA	0		NA	0	0	NA	0	0	0	0		NA	0	NA	0	0
AC185108.3_FG006	NA	NA	NA	NA	0		NA	0		0			NA	0	NA	0	NA	0	NA	0	NA	0	NA	0		NA	0	0	NA	0	0	0	0		NA	0	NA	0	0
AC185108.3_FG010	NA	NA	NA	NA	0		NA	0		0			NA	0	NA	0	NA	0	NA	0	NA	0	NA	0		NA	0	0	NA	0	0	0	0		NA	0	NA	0	0
AC185108.3_FG011	NA	NA	NA	NA	0		NA	0		0			NA	0	NA	0	NA	0	NA	0	NA	0	NA	0		NA	0	0	NA	0	0	0	0		NA	0	NA	0	0
AC185122.3_FG009	NA	NA	NA	NA	0		NA	0		0			NA	0	NA	0	NA	0	NA	0	NA	0	NA	0		NA	0	0	NA	0	0	0	0		NA	0	NA	0	0
AC185126.3_FG006	NA	NA	NA	NA	0		NA	0		0			NA	0	NA	0	NA	0	NA	0	NA	0	NA	0		NA	0	0	NA	0	0	0	0		NA	0	NA	0	0
AC185130.2_FG004	4	4	4	0.283156	0		0.59641	0		0			0.268402	0	0.202117	0	0.377408	0	0.147966	0	0.396124	0	0.369454	0		NA	0	0	NA	0	0	0	0		NA	0	NA	0	0
AC185130.2_FG005	NA	NA	NA	NA	0		NA	0		0			NA	0	NA	0	NA	0	NA	0	NA	0	NA	0		NA	0	0	NA	0	0	0	0		NA	0	NA	0	0
AC185217.3_FG004	NA	NA	NA	NA	0		NA	0		0			NA	0	NA	0	NA	0	NA	0	NA	0	NA	0		NA	0	0	NA	0	0	0	0		NA	0	NA	0	0
AC185217.3_FG007	NA	NA	NA	NA	0		NA	0		0			NA	0	NA	0	NA	0	NA	0	NA	0	NA	0		NA	0	0	NA	0	0	0	0		NA	0	NA	0	0
AC185226.4_FG001	3	2		0.353283	0		0.487262	0		0			6.95603e-05	1	0.336484	0	0.0109362	1	0.00415605	1	0.201553	0	0.337762	0		NA	0	0	NA	0	0	0	0		NA	0	NA	0	0
AC185252.4_FG002	NA	NA	NA	NA	0		NA	0		0			NA	0	NA	0	NA	0	NA	0	NA	0	NA	0		NA	0	0	NA	0	0	0	0		NA	0	NA	0	0
AC185254.4_FG002	4	0		0.211628	0		0.289404	0		0			0.071393	0	0.352461	0	0.29156	0	0.0306976	1	0.060907	0	0.748652	0		NA	0	0	NA	0	0	0	0		NA	0	NA	0	0
AC185256.3_FG002	NA	NA	NA	NA	0		NA	0		0			NA	0	NA	0	NA	0	NA	0	NA	0	NA	0		NA	0	0	NA	0	0	0	0		NA	0	NA	0	0
AC185256.3_FG003	4	4	4	0.419195	0		0.500297	0		0			0.0745278	0	0.52329	0	0.429239	0	0.0943916	0	0.151534	0	0.760253	0		NA	0	0	NA	0	0	0	0		NA	0	NA	0	0
AC185261.4_FG002	NA	NA	NA	NA	0		NA	0		0			NA	0	NA	0	NA	0	NA	0	NA	0	NA	0		NA	0	0	NA	0	0	0	0		NA	0	NA	0	0
AC185265.3_FG003	NA	NA	NA	NA	0		NA	0		0			NA	0	NA	0	NA	0	NA	0	NA	0	NA	0		NA	0	0	NA	0	0	0	0		NA	0	NA	0	0
AC185276.2_FG004	NA	NA	NA	NA	0		NA	0		0			NA	0	NA	0	NA	0	NA	0	NA	0	NA	0		NA	0	0	NA	0	0	0	0		NA	0	NA	0	0
AC185276.2_FG006	NA	NA	NA	NA	0		NA	0		0			NA	0	NA	0	NA	0	NA	0	NA	0	NA	0		NA	0	0	NA	0	0	0	0		NA	0	NA	0	0
AC185281.5_FG006	4	4	4	0.607541	0		0.395932	0		0			0.191102	0	0.450551	0	0.27168	0	0.418361	0	0.178327	0	0.483069	0		NA	0	0	NA	0	0	0	0		NA	0	NA	0	0
AC185300.4_FG002	1	1	1	0.655166	0		0.509387	0		0			6.6485e-12	1	0.00117954	1	6.03122e-05	1	0.00167297	1	0.0137993	1	0.65319	0		0.413022	0	0	0.520253	0	0	0	0		6.05158e-05	1	0.000450294	1	1
AC185305.3_FG003	NA	NA	NA	NA	0		NA	0		0			NA	0	NA	0	NA	0	NA	0	NA	0	NA	0		NA	0	0	NA	0	0	0	0		NA	0	NA	0	0
AC185415.3_FG005	0	0	0	0.344652	0		0.625127	0		0			0.0497172	1	0.517888	0	0.338245	0	0.0572083	0	0.231762	0	0.623967	0		NA	0	0	NA	0	0	0	0		NA	0	NA	0	0
AC185422.3_FG005	0	0	0	0.659507	0		0.539786	0		0			0.0465123	1	0.340444	0	0.369046	0	0.247054	0	0.179901	0	0.670557	0		NA	0	0	NA	0	0	0	0		NA	0	NA	0	0
AC185427.5_FG004	NA	NA	NA	NA	0		NA	0		0			NA	0	NA	0	NA	0	NA	0	NA	0	NA	0		NA	0	0	NA	0	0	0	0		NA	0	NA	0	0
AC185443.3_FG004	NA	NA	NA	NA	0		NA	0		0			NA	0	NA	0	NA	0	NA	0	NA	0	NA	0		NA	0	0	NA	0	0	0	0		NA	0	NA	0	0
AC185460.3_FG004	4	4	4	0.627921	0		0.633866	0		0			0.0611439	0	0.424858	0	0.32956	0	0.229098	0	0.264883	0	0.765839	0		NA	0	0	NA	0	0	0	0		NA	0	NA	0	0
AC185466.3_FG001	4	4	4	0.297864	0		0.573943	0		0			0.197853	0	0.332013	0	0.403472	0	0.107055	0	0.320007	0	0.633218	0		NA	0	0	NA	0	0	0	0		NA	0	NA	0	0
AC185471.3_FG005	3	3	3	0.153942	0		0.271831	0		0			7.94674e-06	1	0.265652	0	0.110016	0	0.000847187	1	0.00284089	1	0.718	0		0.221295	0	0	0.590143	0	0	0	0		0.164488	0	0.250189	0	0
AC185473.3_FG005	NA	NA	NA	NA	0		NA	0		0			NA	0	NA	0	NA	0	NA	0	NA	0	NA	0		NA	0	0	NA	0	0	0	0		NA	0	NA	0	0
AC185475.3_FG001	0	0	0	0.544844	0		0.556224	0		0			0.0107481	1	0.428479	0	0.328934	0	0.052838	0	0.0621009	0	0.76601	0		NA	0	0	NA	0	0	0	0		NA	0	NA	0	0
AC185478.4_FG005	4	4	4	0.384632	0		0.618555	0		0			0.154164	0	0.212935	0	0.276077	0	0.298917	0	0.500554	0	0.65232	0		NA	0	0	NA	0	0	0	0		NA	0	NA	0	0
AC185478.4_FG007	NA	NA	NA	NA	0		NA	0		0			NA	0	NA	0	NA	0	NA	0	NA	0	NA	0		NA	0	0	NA	0	0	0	0		NA	0	NA	0	0
AC185487.4_FG001	NA	NA	NA	NA	0		NA	0		0			NA	0	NA	0	NA	0	NA	0	NA	0	NA	0		NA	0	0	NA	0	0	0	0		NA	0	NA	0	0
AC185500.3_FG001	NA	NA	NA	NA	0		NA	0		0			NA	0	NA	0	NA	0	NA	0	NA	0	NA	0		NA	0	0	NA	0	0	0	0		NA	0	NA	0	0
AC185501.3_FG001	NA	NA	NA	NA	0		NA	0		0			NA	0	NA	0	NA	0	NA	0	NA	0	NA	0		NA	0	0	NA	0	0	0	0		NA	0	NA	0	0
AC185501.3_FG006	NA	NA	NA	NA	0		NA	0		0			NA	0	NA	0	NA	0	NA	0	NA	0	NA	0		NA	0	0	NA	0	0	0	0		NA	0	NA	0	0
AC185504.4_FG002	NA	NA	NA	NA	0		NA	0		0			NA	0	NA	0	NA	0	NA	0	NA	0	NA	0		NA	0	0	NA	0	0	0	0		NA	0	NA	0	0
AC185522.2_FG002	NA	NA	NA	NA	0		NA	0		0			NA	0	NA	0	NA	0	NA	0	NA	0	NA	0		NA	0	0	NA	0	0	0	0		NA	0	NA	0	0
AC185530.2_FG004	0	0	0	0.545333	0		0.623556	0		0			0.0497738	1	0.258342	0	0.202055	0	0.334263	0	0.370575	0	0.760692	0		NA	0	0	NA	0	0	0	0		NA	0	NA	0	0
AC185586.4_FG003	NA	NA	NA	NA	0		NA	0		0			NA	0	NA	0	NA	0	NA	0	NA	0	NA	0		NA	0	0	NA	0	0	0	0		NA	0	NA	0	0
AC185587.3_FG003	4	4	4	0.524017	0		0.678997	0		0			0.189464	0	0.372434	0	0.409467	0	0.383856	0	0.418521	0	0.657358	0		NA	0	0	NA	0	0	0	0		NA	0	NA	0	0
AC185588.2_FG002	4	4	4	0.2983	0		0.624178	0		0			0.152264	0	0.148516	0	0.428567	0	0.235501	0	0.340383	0	0.410529	0		NA	0	0	NA	0	0	0	0		NA	0	NA	0	0
AC185593.3_FG003	NA	NA	NA	NA	0		NA	0		0			NA	0	NA	0	NA	0	NA	0	NA	0	NA	0		NA	0	0	NA	0	0	0	0		NA	0	NA	0	0
AC185605.3_FG003	NA	NA	NA	NA	0		NA	0		0			NA	0	NA	0	NA	0	NA	0	NA	0	NA	0		NA	0	0	NA	0	0	0	0		NA	0	NA	0	0
AC185610.3_FG001	NA	NA	NA	NA	0		NA	0		0			NA	0	NA	0	NA	0	NA	0	NA	0	NA	0		NA	0	0	NA	0	0	0	0		NA	0	NA	0	0
AC185611.3_FG001	0	0	0	0.631084	0		0.652579	0		0			0.0186554	1	0.226361	0	0.138821	0	0.236203	0	0.3128	0	0.772528	0		0.643793	0	0	0.643924	0	0	0	0		0.00713915	1	0.00718952	1	1
AC185623.4_FG010	4	4	4	0.564905	0		0.570901	0		0			0.270628	0	0.464789	0	0.311155	0	0.360125	0	0.41252	0	0.765718	0		NA	0	0	NA	0	0	0	0		NA	0	NA	0	0
AC185623.4_FG012	NA	NA	NA	NA	0		NA	0		0			NA	0	NA	0	NA	0	NA	0	NA	0	NA	0		NA	0	0	NA	0	0	0	0		NA	0	NA	0	0
AC185628.3_FG010	NA	NA	NA	NA	0		NA	0		0			NA	0	NA	0	NA	0	NA	0	NA	0	NA	0		NA	0	0	NA	0	0	0	0		NA	0	NA	0	0
AC185642.4_FG001	NA	NA	NA	NA	0		NA	0		0			NA	0	NA	0	NA	0	NA	0	NA	0	NA	0		NA	0	0	NA	0	0	0	0		NA	0	NA	0	0
AC185648.3_FG007	NA	NA	NA	NA	0		NA	0		0			NA	0	NA	0	NA	0	NA	0	NA	0	NA	0		NA	0	0	NA	0	0	0	0		NA	0	NA	0	0
AC185649.2_FG003	NA	NA	NA	NA	0		NA	0		0			NA	0	NA	0	NA	0	NA	0	NA	0	NA	0		NA	0	0	NA	0	0	0	0		NA	0	NA	0	0
AC185655.3_FG004	NA	NA	NA	NA	0		NA	0		0			NA	0	NA	0	NA	0	NA	0	NA	0	NA	0		NA	0	0	NA	0	0	0	0		NA	0	NA	0	0
AC185655.3_FG005	NA	NA	NA	NA	0		NA	0		0			NA	0	NA	0	NA	0	NA	0	NA	0	NA	0		NA	0	0	NA	0	0	0	0		NA	0	NA	0	0
AC185656.3_FG002	NA	NA	NA	NA	0		NA	0		0			NA	0	NA	0	NA	0	NA	0	NA	0	NA	0		NA	0	0	NA	0	0	0	0		NA	0	NA	0	0
AC185660.3_FG003	NA	NA	NA	NA	0		NA	0		0			NA	0	NA	0	NA	0	NA	0	NA	0	NA	0		NA	0	0	NA	0	0	0	0		NA	0	NA	0	0
AC186009.3_FG001	NA	NA	NA	NA	0		NA	0		0			NA	0	NA	0	NA	0	NA	0	NA	0	NA	0		NA	0	0	NA	0	0	0	0		NA	0	NA	0	0
AC186013.3_FG001	0	0	0	0.494153	0		0.420993	0		0			0.0223143	1	0.180783	0	0.0795479	0	0.285172	0	0.437602	0	0.725454	0		NA	0	0	NA	0	0	0	0		NA	0	NA	0	0
AC186145.3_FG002	0	0	0	0.621389	0		0.59275	0		0			0.00740708	1	0.163948	0	0.0714412	0	0.201884	0	0.322968	0	0.741932	0		NA	0	0	NA	0	0	0	0		NA	0	NA	0	0
AC186147.3_FG008	2	2	2	0.354125	0		0.419037	0		0			0.0107942	1	0.57895	0	0.426692	0	0.0221878	1	0.036375	1	0.763843	0		NA	0	0	NA	0	0	0	0		NA	0	NA	0	0
AC186156.3_FG004	NA	NA	NA	NA	0		NA	0		0			NA	0	NA	0	NA	0	NA	0	NA	0	NA	0		NA	0	0	NA	0	0	0	0		NA	0	NA	0	0
AC186156.3_FG005	NA	NA	NA	NA	0		NA	0		0			NA	0	NA	0	NA	0	NA	0	NA	0	NA	0		NA	0	0	NA	0	0	0	0		NA	0	NA	0	0
AC186164.3_FG001	0	3		0.475676	0		0.618502	0		0			0.000598957	1	0.172558	0	0.061009	0	0.0326322	1	0.0816302	0	0.715015	0		NA	0	0	NA	0	0	0	0		NA	0	NA	0	0
AC186166.3_FG008	4	4	4	0.620775	0		0.26139	0		0			0.214685	0	0.479917	0	0.183077	0	0.422779	0	0.123675	0	0.400705	0		0.0209096	1	0	0.0189473	1	0	1	0		3.99897e-05	1	6.68177e-06	1	1
AC186189.3_FG004	NA	NA	NA	NA	0		NA	0		0			NA	0	NA	0	NA	0	NA	0	NA	0	NA	0		NA	0	0	NA	0	0	0	0		NA	0	NA	0	0
AC186189.3_FG005	NA	NA	NA	NA	0		NA	0		0			NA	0	NA	0	NA	0	NA	0	NA	0	NA	0		NA	0	0	NA	0	0	0	0		NA	0	NA	0	0
AC186195.4_FG001	NA	NA	NA	NA	0		NA	0		0			NA	0	NA	0	NA	0	NA	0	NA	0	NA	0		NA	0	0	NA	0	0	0	0		NA	0	NA	0	0
AC186231.4_FG002	3	3	3	0.17476	0		0.382767	0		0			6.78866e-05	1	0.466433	0	0.206961	0	0.00099303	1	0.00712481	1	0.67123	0		0.737129	0	0	0.737316	0	0	0	0		1.49661e-07	1	1.85782e-05	1	1
AC186233.3_FG007	NA	NA	NA	NA	0		NA	0		0			NA	0	NA	0	NA	0	NA	0	NA	0	NA	0		NA	0	0	NA	0	0	0	0		NA	0	NA	0	0
AC186283.4_FG002	NA	NA	NA	NA	0		NA	0		0			NA	0	NA	0	NA	0	NA	0	NA	0	NA	0		NA	0	0	NA	0	0	0	0		NA	0	NA	0	0
AC186284.3_FG007	NA	NA	NA	NA	0		NA	0		0			NA	0	NA	0	NA	0	NA	0	NA	0	NA	0		NA	0	0	NA	0	0	0	0		NA	0	NA	0	0
AC186287.7_FG005	4	4	4	0.618447	0		0.587627	0		0			0.244062	0	0.569837	0	0.313456	0	0.351411	0	0.451515	0	0.652794	0		NA	0	0	NA	0	0	0	0		NA	0	NA	0	0
AC186309.3_FG002	NA	NA	NA	NA	0		NA	0		0			NA	0	NA	0	NA	0	NA	0	NA	0	NA	0		NA	0	0	NA	0	0	0	0		NA	0	NA	0	0
AC186309.3_FG006	NA	NA	NA	NA	0		NA	0		0			NA	0	NA	0	NA	0	NA	0	NA	0	NA	0		NA	0	0	NA	0	0	0	0		NA	0	NA	0	0
AC186310.4_FG004	NA	NA	NA	NA	0		NA	0		0			NA	0	NA	0	NA	0	NA	0	NA	0	NA	0		NA	0	0	NA	0	0	0	0		NA	0	NA	0	0
AC186322.4_FG003	NA	NA	NA	NA	0		NA	0		0			NA	0	NA	0	NA	0	NA	0	NA	0	NA	0		NA	0	0	NA	0	0	0	0		NA	0	NA	0	0
AC186322.4_FG005	0	4		0.462957	0		0.174473	0		0			0.0587999	0	0.205017	0	0.187826	0	0.405224	0	0.0264383	1	0.195856	0		NA	0	0	NA	0	0	0	0		NA	0	NA	0	0
AC186329.3_FG006	NA	NA	NA	NA	0		NA	0		0			NA	0	NA	0	NA	0	NA	0	NA	0	NA	0		NA	0	0	NA	0	0	0	0		NA	0	NA	0	0
AC186337.3_FG003	NA	NA	NA	NA	0		NA	0		0			NA	0	NA	0	NA	0	NA	0	NA	0	NA	0		NA	0	0	NA	0	0	0	0		NA	0	NA	0	0
AC186375.3_FG001	NA	NA	NA	NA	0		NA	0		0			NA	0	NA	0	NA	0	NA	0	NA	0	NA	0		NA	0	0	NA	0	0	0	0		NA	0	NA	0	0
AC186404.3_FG002	NA	NA	NA	NA	0		NA	0		0			NA	0	NA	0	NA	0	NA	0	NA	0	NA	0		NA	0	0	NA	0	0	0	0		NA	0	NA	0	0
AC186406.4_FG006	0	0	0	0.651253	0		0.44116	0		0			0.0368729	1	0.38762	0	0.429555	0	0.182617	0	0.0806813	0	0.599338	0		NA	0	0	NA	0	0	0	0		NA	0	NA	0	0
AC186408.5_FG005	NA	NA	NA	NA	0		NA	0		0			NA	0	NA	0	NA	0	NA	0	NA	0	NA	0		NA	0	0	NA	0	0	0	0		NA	0	NA	0	0
AC186412.4_FG011	NA	NA	NA	NA	0		NA	0		0			NA	0	NA	0	NA	0	NA	0	NA	0	NA	0		NA	0	0	NA	0	0	0	0		NA	0	NA	0	0
AC186417.3_FG004	0	2		0.444904	0		0.508521	0		0			0.0130691	1	0.524412	0	0.371135	0	0.0410815	1	0.0642157	0	0.765839	0		NA	0	0	NA	0	0	0	0		NA	0	NA	0	0
AC186417.3_FG006	NA	NA	NA	NA	0		NA	0		0			NA	0	NA	0	NA	0	NA	0	NA	0	NA	0		NA	0	0	NA	0	0	0	0		NA	0	NA	0	0
AC186424.4_FG009	NA	NA	NA	NA	0		NA	0		0			NA	0	NA	0	NA	0	NA	0	NA	0	NA	0		NA	0	0	NA	0	0	0	0		NA	0	NA	0	0
AC186431.5_FG001	4	4	4	0.38267	0		0.683907	0		0			0.224035	0	0.25924	0	0.421739	0	0.245146	0	0.45324	0	0.541067	0		NA	0	0	NA	0	0	0	0		NA	0	NA	0	0
AC186433.4_FG001	NA	NA	NA	NA	0		NA	0		0			NA	0	NA	0	NA	0	NA	0	NA	0	NA	0		NA	0	0	NA	0	0	0	0		NA	0	NA	0	0
AC186493.4_FG002	NA	NA	NA	NA	0		NA	0		0			NA	0	NA	0	NA	0	NA	0	NA	0	NA	0		NA	0	0	NA	0	0	0	0		NA	0	NA	0	0
AC186500.3_FG001	NA	NA	NA	NA	0		NA	0		0			NA	0	NA	0	NA	0	NA	0	NA	0	NA	0		NA	0	0	NA	0	0	0	0		NA	0	NA	0	0
AC186506.3_FG001	NA	NA	NA	NA	0		NA	0		0			NA	0	NA	0	NA	0	NA	0	NA	0	NA	0		NA	0	0	NA	0	0	0	0		NA	0	NA	0	0
AC186512.3_FG007	8	8	8	0.00114767	1	8	4.6188e-06	1	8	1	8		0.08926	0	0.0121133	1	0.000189191	1	0.000127188	1	1.02116e-06	1	0.527111	0		NA	0	0	NA	0	0	0	0		NA	0	NA	0	0
AC186519.4_FG002	NA	NA	NA	NA	0		NA	0		0			NA	0	NA	0	NA	0	NA	0	NA	0	NA	0		NA	0	0	NA	0	0	0	0		NA	0	NA	0	0
AC186524.3_FG005	NA	NA	NA	NA	0		NA	0		0			NA	0	NA	0	NA	0	NA	0	NA	0	NA	0		NA	0	0	NA	0	0	0	0		NA	0	NA	0	0
AC186524.3_FG006	NA	NA	NA	NA	0		NA	0		0			NA	0	NA	0	NA	0	NA	0	NA	0	NA	0		NA	0	0	NA	0	0	0	0		NA	0	NA	0	0
AC186563.4_FG004	NA	NA	NA	NA	0		NA	0		0			NA	0	NA	0	NA	0	NA	0	NA	0	NA	0		NA	0	0	NA	0	0	0	0		NA	0	NA	0	0
AC186577.3_FG006	4	4	4	0.472851	0		0.617493	0		0			0.0916043	0	0.570148	0	0.222839	0	0.14634	0	0.458215	0	0.554266	0		0.63811	0	0	0.678904	0	0	0	0		0.134284	0	0.119828	0	0
AC186579.3_FG007	NA	NA	NA	NA	0		NA	0		0			NA	0	NA	0	NA	0	NA	0	NA	0	NA	0		NA	0	0	NA	0	0	0	0		NA	0	NA	0	0
AC186581.3_FG003	3	0		0.531892	0		0.227748	0		0			0.0076127	1	0.165104	0	0.03208	1	0.0874303	0	0.397779	0	0.512478	0		NA	0	0	NA	0	0	0	0		NA	0	NA	0	0
AC186583.3_FG004	NA	NA	NA	NA	0		NA	0		0			NA	0	NA	0	NA	0	NA	0	NA	0	NA	0		NA	0	0	NA	0	0	0	0		NA	0	NA	0	0
AC186585.4_FG002	NA	NA	NA	NA	0		NA	0		0			NA	0	NA	0	NA	0	NA	0	NA	0	NA	0		NA	0	0	NA	0	0	0	0		NA	0	NA	0	0
AC186590.3_FG005	NA	NA	NA	NA	0		NA	0		0			NA	0	NA	0	NA	0	NA	0	NA	0	NA	0		NA	0	0	NA	0	0	0	0		NA	0	NA	0	0
AC186590.3_FG006	NA	NA	NA	NA	0		NA	0		0			NA	0	NA	0	NA	0	NA	0	NA	0	NA	0		NA	0	0	NA	0	0	0	0		NA	0	NA	0	0
AC186592.3_FG002	NA	NA	NA	NA	0		NA	0		0			NA	0	NA	0	NA	0	NA	0	NA	0	NA	0		NA	0	0	NA	0	0	0	0		NA	0	NA	0	0
AC186592.3_FG003	NA	NA	NA	NA	0		NA	0		0			NA	0	NA	0	NA	0	NA	0	NA	0	NA	0		NA	0	0	NA	0	0	0	0		NA	0	NA	0	0
AC186602.4_FG003	4	4	4	0.661649	0		0.51014	0		0			0.0747701	0	0.42932	0	0.432024	0	0.246753	0	0.154647	0	0.637866	0		NA	0	0	NA	0	0	0	0		NA	0	NA	0	0
AC186603.6_FG003	4	4	4	0.476951	0		0.496035	0		0			0.236044	0	0.462683	0	0.232733	0	0.238045	0	0.373606	0	0.446829	0		NA	0	0	NA	0	0	0	0		NA	0	NA	0	0
AC186606.4_FG003	4	4	4	0.559496	0		0.500862	0		0			0.222083	0	0.533298	0	0.32982	0	0.285869	0	0.274109	0	0.725436	0		0.509302	0	0	0.502221	0	0	0	0		0.14001	0	0.140852	0	0
AC186611.4_FG005	NA	NA	NA	NA	0		NA	0		0			NA	0	NA	0	NA	0	NA	0	NA	0	NA	0		NA	0	0	NA	0	0	0	0		NA	0	NA	0	0
AC186613.4_FG003	NA	NA	NA	NA	0		NA	0		0			NA	0	NA	0	NA	0	NA	0	NA	0	NA	0		NA	0	0	NA	0	0	0	0		NA	0	NA	0	0
AC186619.3_FG001	NA	NA	NA	NA	0		NA	0		0			NA	0	NA	0	NA	0	NA	0	NA	0	NA	0		NA	0	0	NA	0	0	0	0		NA	0	NA	0	0
AC186647.3_FG001	NA	NA	NA	NA	0		NA	0		0			NA	0	NA	0	NA	0	NA	0	NA	0	NA	0		NA	0	0	NA	0	0	0	0		NA	0	NA	0	0
AC186653.4_FG005	NA	NA	NA	NA	0		NA	0		0			NA	0	NA	0	NA	0	NA	0	NA	0	NA	0		NA	0	0	NA	0	0	0	0		NA	0	NA	0	0
AC186656.4_FG004	NA	NA	NA	NA	0		NA	0		0			NA	0	NA	0	NA	0	NA	0	NA	0	NA	0		NA	0	0	NA	0	0	0	0		NA	0	NA	0	0
AC186656.4_FG012	0	0	0	0.472154	0		0.532396	0		0			0.0106739	1	0.152385	0	0.105452	0	0.123949	0	0.148603	0	0.766746	0		NA	0	0	NA	0	0	0	0		NA	0	NA	0	0
AC186663.3_FG006	NA	NA	NA	NA	0		NA	0		0			NA	0	NA	0	NA	0	NA	0	NA	0	NA	0		NA	0	0	NA	0	0	0	0		NA	0	NA	0	0
AC186667.3_FG007	4	4	4	0.609099	0		0.6741	0		0			0.0932808	0	0.372444	0	0.288992	0	0.338782	0	0.383262	0	0.763843	0		NA	0	0	NA	0	0	0	0		NA	0	NA	0	0
AC186669.3_FG002	NA	NA	NA	NA	0		NA	0		0			NA	0	NA	0	NA	0	NA	0	NA	0	NA	0		NA	0	0	NA	0	0	0	0		NA	0	NA	0	0
AC186684.4_FG001	0	0	0	0.659761	0		0.60607	0		0			0.0489635	1	0.379348	0	0.190542	0	0.224089	0	0.37788	0	0.719885	0		NA	0	0	NA	0	0	0	0		NA	0	NA	0	0
AC186691.4_FG006	NA	NA	NA	NA	0		NA	0		0			NA	0	NA	0	NA	0	NA	0	NA	0	NA	0		NA	0	0	NA	0	0	0	0		NA	0	NA	0	0
AC186743.4_FG003	NA	NA	NA	NA	0		NA	0		0			NA	0	NA	0	NA	0	NA	0	NA	0	NA	0		NA	0	0	NA	0	0	0	0		NA	0	NA	0	0
AC186781.4_FG006	4	4	4	0.295464	0		0.639788	0		0			0.0624102	0	0.12051	0	0.232322	0	0.351347	0	0.368506	0	0.573154	0		NA	0	0	NA	0	0	0	0		NA	0	NA	0	0
AC186782.4_FG003	4	4	4	0.315099	0		0.179927	0		0			0.22837	0	0.341349	0	0.140697	0	0.14953	0	0.11384	0	0.688052	0		NA	0	0	NA	0	0	0	0		NA	0	NA	0	0
AC186785.4_FG002	4	4	4	0.664777	0		0.676433	0		0			0.199006	0	0.52329	0	0.41772	0	0.366301	0	0.423762	0	0.765839	0		NA	0	0	NA	0	0	0	0		NA	0	NA	0	0
AC186789.4_FG001	NA	NA	NA	NA	0		NA	0		0			NA	0	NA	0	NA	0	NA	0	NA	0	NA	0		NA	0	0	NA	0	0	0	0		NA	0	NA	0	0
AC186800.3_FG005	NA	NA	NA	NA	0		NA	0		0			NA	0	NA	0	NA	0	NA	0	NA	0	NA	0		NA	0	0	NA	0	0	0	0		NA	0	NA	0	0
AC186807.4_FG002	NA	NA	NA	NA	0		NA	0		0			NA	0	NA	0	NA	0	NA	0	NA	0	NA	0		NA	0	0	NA	0	0	0	0		NA	0	NA	0	0
AC186815.3_FG003	NA	NA	NA	NA	0		NA	0		0			NA	0	NA	0	NA	0	NA	0	NA	0	NA	0		NA	0	0	NA	0	0	0	0		NA	0	NA	0	0
AC186828.3_FG001	NA	NA	NA	NA	0		NA	0		0			NA	0	NA	0	NA	0	NA	0	NA	0	NA	0		NA	0	0	NA	0	0	0	0		NA	0	NA	0	0
AC186845.4_FG009	NA	NA	NA	NA	0		NA	0		0			NA	0	NA	0	NA	0	NA	0	NA	0	NA	0		NA	0	0	NA	0	0	0	0		NA	0	NA	0	0
AC186897.4_FG016	NA	NA	NA	NA	0		NA	0		0			NA	0	NA	0	NA	0	NA	0	NA	0	NA	0		NA	0	0	NA	0	0	0	0		NA	0	NA	0	0
AC186902.4_FG006	NA	NA	NA	NA	0		NA	0		0			NA	0	NA	0	NA	0	NA	0	NA	0	NA	0		NA	0	0	NA	0	0	0	0		NA	0	NA	0	0
AC186902.4_FG009	NA	NA	NA	NA	0		NA	0		0			NA	0	NA	0	NA	0	NA	0	NA	0	NA	0		NA	0	0	NA	0	0	0	0		NA	0	NA	0	0
AC186904.4_FG007	NA	NA	NA	NA	0		NA	0		0			NA	0	NA	0	NA	0	NA	0	NA	0	NA	0		NA	0	0	NA	0	0	0	0		NA	0	NA	0	0
AC186905.3_FG013	NA	NA	NA	NA	0		NA	0		0			NA	0	NA	0	NA	0	NA	0	NA	0	NA	0		NA	0	0	NA	0	0	0	0		NA	0	NA	0	0
AC187037.4_FG008	NA	NA	NA	NA	0		NA	0		0			NA	0	NA	0	NA	0	NA	0	NA	0	NA	0		NA	0	0	NA	0	0	0	0		NA	0	NA	0	0
AC187046.3_FG009	NA	NA	NA	NA	0		NA	0		0			NA	0	NA	0	NA	0	NA	0	NA	0	NA	0		NA	0	0	NA	0	0	0	0		NA	0	NA	0	0
AC187056.3_FG002	NA	NA	NA	NA	0		NA	0		0			NA	0	NA	0	NA	0	NA	0	NA	0	NA	0		NA	0	0	NA	0	0	0	0		NA	0	NA	0	0
AC187065.3_FG003	NA	NA	NA	NA	0		NA	0		0			NA	0	NA	0	NA	0	NA	0	NA	0	NA	0		NA	0	0	NA	0	0	0	0		NA	0	NA	0	0
AC187067.4_FG001	NA	NA	NA	NA	0		NA	0		0			NA	0	NA	0	NA	0	NA	0	NA	0	NA	0		NA	0	0	NA	0	0	0	0		NA	0	NA	0	0
AC187072.4_FG001	NA	NA	NA	NA	0		NA	0		0			NA	0	NA	0	NA	0	NA	0	NA	0	NA	0		NA	0	0	NA	0	0	0	0		NA	0	NA	0	0
AC187072.4_FG002	NA	NA	NA	NA	0		NA	0		0			NA	0	NA	0	NA	0	NA	0	NA	0	NA	0		NA	0	0	NA	0	0	0	0		NA	0	NA	0	0
AC187080.3_FG006	NA	NA	NA	NA	0		NA	0		0			NA	0	NA	0	NA	0	NA	0	NA	0	NA	0		NA	0	0	NA	0	0	0	0		NA	0	NA	0	0
AC187080.3_FG007	NA	NA	NA	NA	0		NA	0		0			NA	0	NA	0	NA	0	NA	0	NA	0	NA	0		NA	0	0	NA	0	0	0	0		NA	0	NA	0	0
AC187082.3_FG003	NA	NA	NA	NA	0		NA	0		0			NA	0	NA	0	NA	0	NA	0	NA	0	NA	0		NA	0	0	NA	0	0	0	0		NA	0	NA	0	0
AC187086.3_FG004	NA	NA	NA	NA	0		NA	0		0			NA	0	NA	0	NA	0	NA	0	NA	0	NA	0		NA	0	0	NA	0	0	0	0		NA	0	NA	0	0
AC187088.3_FG002	NA	NA	NA	NA	0		NA	0		0			NA	0	NA	0	NA	0	NA	0	NA	0	NA	0		NA	0	0	NA	0	0	0	0		NA	0	NA	0	0
AC187090.3_FG003	NA	NA	NA	NA	0		NA	0		0			NA	0	NA	0	NA	0	NA	0	NA	0	NA	0		NA	0	0	NA	0	0	0	0		NA	0	NA	0	0
AC187090.3_FG011	4	4	4	0.567608	0		0.683611	0		0			0.0797996	0	0.302115	0	0.277154	0	0.373099	0	0.374829	0	0.724765	0		0.75404	0	0	0.735557	0	0	0	0		0.200486	0	0.278554	0	0
AC187092.6_FG003	NA	NA	NA	NA	0		NA	0		0			NA	0	NA	0	NA	0	NA	0	NA	0	NA	0		NA	0	0	NA	0	0	0	0		NA	0	NA	0	0
AC187096.5_FG001	0	0	0	0.616472	0		0.412599	0		0			0.0100233	1	0.349899	0	0.0589077	0	0.0759759	0	0.368332	0	0.511726	0		NA	0	0	NA	0	0	0	0		NA	0	NA	0	0
AC187098.4_FG011	2	2	2	0.066652	0		0.103639	0		0			0.017181	1	0.00474385	1	0.00492803	1	0.183988	0	0.293431	0	0.74868	0		NA	0	0	NA	0	0	0	0		NA	0	NA	0	0
AC187099.5_FG005	NA	NA	NA	NA	0		NA	0		0			NA	0	NA	0	NA	0	NA	0	NA	0	NA	0		NA	0	0	NA	0	0	0	0		NA	0	NA	0	0
AC187142.3_FG007	NA	NA	NA	NA	0		NA	0		0			NA	0	NA	0	NA	0	NA	0	NA	0	NA	0		NA	0	0	NA	0	0	0	0		NA	0	NA	0	0
AC187157.4_FG001	7	0		0.661559	0		2.85366e-05	1	7	0			0.0329848	1	0.346648	0	1.40941e-06	1	0.215647	0	0.00253076	1	0.00292617	1		0.0891473	0	0	0.193701	0	0	0	0		0.000122941	1	0.00313935	1	1
AC187157.4_FG002	4	4	4	0.461624	0		0.23907	0		0			0.18551	0	0.484173	0	0.188077	0	0.193506	0	0.099837	0	0.634437	0		0.626459	0	0	0.703376	0	0	0	0		0.155247	0	0.382202	0	0
AC187157.4_FG005	0	0	0	0.463993	0		0.572565	0		0			0.0133362	1	0.483242	0	0.0969512	0	0.0611016	0	0.361621	0	0.502219	0		0.423361	0	0	0.13919	0	0	0	0		0.00544732	1	0.165649	0	0
AC187160.3_FG003	NA	NA	NA	NA	0		NA	0		0			NA	0	NA	0	NA	0	NA	0	NA	0	NA	0		NA	0	0	NA	0	0	0	0		NA	0	NA	0	0
AC187207.3_FG006	NA	NA	NA	NA	0		NA	0		0			NA	0	NA	0	NA	0	NA	0	NA	0	NA	0		NA	0	0	NA	0	0	0	0		NA	0	NA	0	0
AC187209.5_FG003	NA	NA	NA	NA	0		NA	0		0			NA	0	NA	0	NA	0	NA	0	NA	0	NA	0		NA	0	0	NA	0	0	0	0		NA	0	NA	0	0
AC187209.5_FG010	NA	NA	NA	NA	0		NA	0		0			NA	0	NA	0	NA	0	NA	0	NA	0	NA	0		NA	0	0	NA	0	0	0	0		NA	0	NA	0	0
AC187212.3_FG011	4	4	4	0.527057	0		0.615546	0		0			0.233521	0	0.497472	0	0.416897	0	0.26591	0	0.386362	0	0.749573	0		NA	0	0	NA	0	0	0	0		NA	0	NA	0	0
AC187217.4_FG004	3	3	3	0.00287068	1	3	0.210589	0		0			0.00157014	1	7.32377e-05	1	0.00666408	1	0.111979	0	0.477736	0	0.381583	0		NA	0	0	NA	0	0	0	0		NA	0	NA	0	0
AC187222.4_FG001	4	4	4	0.559912	0		0.581854	0		0			0.160665	0	0.368146	0	0.243493	0	0.418898	0	0.490262	0	0.771319	0		NA	0	0	NA	0	0	0	0		NA	0	NA	0	0
AC187235.3_FG003	NA	NA	NA	NA	0		NA	0		0			NA	0	NA	0	NA	0	NA	0	NA	0	NA	0		NA	0	0	NA	0	0	0	0		NA	0	NA	0	0
AC187241.4_FG009	NA	NA	NA	NA	0		NA	0		0			NA	0	NA	0	NA	0	NA	0	NA	0	NA	0		NA	0	0	NA	0	0	0	0		NA	0	NA	0	0
AC187243.3_FG005	4	4	4	0.464803	0		0.475327	0		0			0.139896	0	0.508845	0	0.360217	0	0.160846	0	0.19193	0	0.767403	0		NA	0	0	NA	0	0	0	0		NA	0	NA	0	0
AC187262.4_FG007	3	3	3	0.244839	0		0.504981	0		0			8.2661e-07	1	0.281493	0	0.0776018	0	0.000311683	1	0.00381522	1	0.650372	0		0.699858	0	0	0.698712	0	0	0	0		0.0104198	1	0.0172332	1	1
AC187263.4_FG001	3	3	3	0.317751	0		0.276381	0		0			8.50143e-05	1	0.166924	0	0.144523	0	0.00766697	1	0.00712748	1	0.746299	0		NA	0	0	NA	0	0	0	0		NA	0	NA	0	0
AC187279.3_FG003	NA	NA	NA	NA	0		NA	0		0			NA	0	NA	0	NA	0	NA	0	NA	0	NA	0		NA	0	0	NA	0	0	0	0		NA	0	NA	0	0
AC187279.3_FG004	4	4	4	0.384267	0		0.362493	0		0			0.0505019	0	0.168704	0	0.0927234	0	0.418898	0	0.495889	0	0.762051	0		NA	0	0	NA	0	0	0	0		NA	0	NA	0	0
AC187283.3_FG005	4	4	4	0.437649	0		0.546232	0		0			0.139578	0	0.241604	0	0.426332	0	0.344549	0	0.2591	0	0.4539	0		NA	0	0	NA	0	0	0	0		NA	0	NA	0	0
AC187393.3_FG001	3	3	3	0.010989	1	3	0.0107815	1	3	1	3		4.23783e-06	1	0.000290272	1	0.000176161	1	0.0545439	0	0.0722647	0	0.779293	0		0.500705	0	0	0.521718	0	0	0	0		0.222182	0	0.146842	0	0
AC187404.3_FG003	0	0	0	0.629028	0		0.690246	0		0			0.0333976	1	0.409834	0	0.243626	0	0.142857	0	0.233845	0	0.747841	0		NA	0	0	NA	0	0	0	0		NA	0	NA	0	0
AC187404.3_FG006	3	2		0.457489	0		0.215405	0		0			0.000254484	1	0.0508105	0	0.0080874	1	0.0294076	1	0.15804	0	0.592795	0		NA	0	0	NA	0	0	0	0		NA	0	NA	0	0
AC187460.4_FG002	NA	NA	NA	NA	0		NA	0		0			NA	0	NA	0	NA	0	NA	0	NA	0	NA	0		NA	0	0	NA	0	0	0	0		NA	0	NA	0	0
AC187469.3_FG005	NA	NA	NA	NA	0		NA	0		0			NA	0	NA	0	NA	0	NA	0	NA	0	NA	0		NA	0	0	NA	0	0	0	0		NA	0	NA	0	0
AC187485.3_FG001	NA	NA	NA	NA	0		NA	0		0			NA	0	NA	0	NA	0	NA	0	NA	0	NA	0		NA	0	0	NA	0	0	0	0		NA	0	NA	0	0
AC187551.3_FG002	4	4	4	0.399314	0		0.378642	0		0			0.0652626	0	0.541941	0	0.378855	0	0.0893246	0	0.0982657	0	0.761901	0		0.743093	0	0	0.620017	0	0	0	0		0.0440159	1	0.179131	0	0
AC187560.5_FG003	4	4	4	0.571172	0		0.30475	0		0			0.271733	0	0.475745	0	0.159081	0	0.36679	0	0.226246	0	0.59724	0		NA	0	0	NA	0	0	0	0		NA	0	NA	0	0
AC187567.4_FG004	0	0	0	0.629359	0		0.359278	0		0			0.0335312	1	0.401884	0	0.390722	0	0.172213	0	0.0559137	0	0.566768	0		NA	0	0	NA	0	0	0	0		NA	0	NA	0	0
AC187782.4_FG009	NA	NA	NA	NA	0		NA	0		0			NA	0	NA	0	NA	0	NA	0	NA	0	NA	0		NA	0	0	NA	0	0	0	0		NA	0	NA	0	0
AC187789.3_FG001	NA	NA	NA	NA	0		NA	0		0			NA	0	NA	0	NA	0	NA	0	NA	0	NA	0		NA	0	0	NA	0	0	0	0		NA	0	NA	0	0
AC187800.4_FG003	NA	NA	NA	NA	0		NA	0		0			NA	0	NA	0	NA	0	NA	0	NA	0	NA	0		NA	0	0	NA	0	0	0	0		NA	0	NA	0	0
AC187802.3_FG008	NA	NA	NA	NA	0		NA	0		0			NA	0	NA	0	NA	0	NA	0	NA	0	NA	0		NA	0	0	NA	0	0	0	0		NA	0	NA	0	0
AC187809.3_FG005	NA	NA	NA	NA	0		NA	0		0			NA	0	NA	0	NA	0	NA	0	NA	0	NA	0		NA	0	0	NA	0	0	0	0		NA	0	NA	0	0
AC187813.3_FG002	NA	NA	NA	NA	0		NA	0		0			NA	0	NA	0	NA	0	NA	0	NA	0	NA	0		NA	0	0	NA	0	0	0	0		NA	0	NA	0	0
AC187818.3_FG004	NA	NA	NA	NA	0		NA	0		0			NA	0	NA	0	NA	0	NA	0	NA	0	NA	0		NA	0	0	NA	0	0	0	0		NA	0	NA	0	0
AC187826.3_FG007	NA	NA	NA	NA	0		NA	0		0			NA	0	NA	0	NA	0	NA	0	NA	0	NA	0		NA	0	0	NA	0	0	0	0		NA	0	NA	0	0
AC187843.3_FG001	NA	NA	NA	NA	0		NA	0		0			NA	0	NA	0	NA	0	NA	0	NA	0	NA	0		NA	0	0	NA	0	0	0	0		NA	0	NA	0	0
AC187843.3_FG006	4	4	4	0.5917	0		0.696477	0		0			0.0942493	0	0.51359	0	0.307568	0	0.224249	0	0.371257	0	0.725209	0		0.636013	0	0	0.679159	0	0	0	0		0.173081	0	0.345397	0	0
AC187843.3_FG010	NA	NA	NA	NA	0		NA	0		0			NA	0	NA	0	NA	0	NA	0	NA	0	NA	0		NA	0	0	NA	0	0	0	0		NA	0	NA	0	0
AC187870.3_FG002	NA	NA	NA	NA	0		NA	0		0			NA	0	NA	0	NA	0	NA	0	NA	0	NA	0		NA	0	0	NA	0	0	0	0		NA	0	NA	0	0
AC187872.3_FG005	NA	NA	NA	NA	0		NA	0		0			NA	0	NA	0	NA	0	NA	0	NA	0	NA	0		NA	0	0	NA	0	0	0	0		NA	0	NA	0	0
AC187879.3_FG001	NA	NA	NA	NA	0		NA	0		0			NA	0	NA	0	NA	0	NA	0	NA	0	NA	0		NA	0	0	NA	0	0	0	0		NA	0	NA	0	0
AC187885.3_FG002	NA	NA	NA	NA	0		NA	0		0			NA	0	NA	0	NA	0	NA	0	NA	0	NA	0		NA	0	0	NA	0	0	0	0		NA	0	NA	0	0
AC187887.3_FG008	NA	NA	NA	NA	0		NA	0		0			NA	0	NA	0	NA	0	NA	0	NA	0	NA	0		NA	0	0	NA	0	0	0	0		NA	0	NA	0	0
AC187891.3_FG006	4	4	4	0.578438	0		0.487255	0		0			0.058465	0	0.28241	0	0.111985	0	0.343597	0	0.51049	0	0.706983	0		0.710254	0	0	0.427045	0	0	0	0		0.0364731	1	0.234603	0	0
AC187895.2_FG001	NA	NA	NA	NA	0		NA	0		0			NA	0	NA	0	NA	0	NA	0	NA	0	NA	0		NA	0	0	NA	0	0	0	0		NA	0	NA	0	0
AC187895.2_FG002	NA	NA	NA	NA	0		NA	0		0			NA	0	NA	0	NA	0	NA	0	NA	0	NA	0		NA	0	0	NA	0	0	0	0		NA	0	NA	0	0
AC187896.3_FG006	NA	NA	NA	NA	0		NA	0		0			NA	0	NA	0	NA	0	NA	0	NA	0	NA	0		NA	0	0	NA	0	0	0	0		NA	0	NA	0	0
AC187899.3_FG002	1	3		0.19077	0		0.460405	0		0			9.64036e-05	1	0.00851842	1	0.0201112	1	0.110175	0	0.0396821	1	0.611198	0		NA	0	0	NA	0	0	0	0		NA	0	NA	0	0
AC187901.4_FG004	NA	NA	NA	NA	0		NA	0		0			NA	0	NA	0	NA	0	NA	0	NA	0	NA	0		NA	0	0	NA	0	0	0	0		NA	0	NA	0	0
AC187903.3_FG004	NA	NA	NA	NA	0		NA	0		0			NA	0	NA	0	NA	0	NA	0	NA	0	NA	0		NA	0	0	NA	0	0	0	0		NA	0	NA	0	0
AC187910.5_FG002	NA	NA	NA	NA	0		NA	0		0			NA	0	NA	0	NA	0	NA	0	NA	0	NA	0		NA	0	0	NA	0	0	0	0		NA	0	NA	0	0
AC188000.3_FG003	0	0	0	0.278828	0		0.530585	0		0			0.034172	1	0.0942472	0	0.132985	0	0.395567	0	0.393946	0	0.649252	0		NA	0	0	NA	0	0	0	0		NA	0	NA	0	0
AC188001.3_FG009	4	4	4	0.420404	0		0.677303	0		0			0.213569	0	0.304811	0	0.376615	0	0.297827	0	0.483165	0	0.630604	0		NA	0	0	NA	0	0	0	0		NA	0	NA	0	0
AC188003.3_FG012	NA	NA	NA	NA	0		NA	0		0			NA	0	NA	0	NA	0	NA	0	NA	0	NA	0		NA	0	0	NA	0	0	0	0		NA	0	NA	0	0
AC188023.3_FG005	4	4	4	0.649938	0		0.65051	0		0			0.0849612	0	0.401384	0	0.251521	0	0.304785	0	0.416742	0	0.762688	0		0.749191	0	0	0.252124	0	0	0	0		0.0374072	1	0.327492	0	0
AC188023.3_FG011	NA	NA	NA	NA	0		NA	0		0			NA	0	NA	0	NA	0	NA	0	NA	0	NA	0		NA	0	0	NA	0	0	0	0		NA	0	NA	0	0
AC188036.3_FG003	4	4	4	0.637158	0		0.333415	0		0			0.271227	0	0.53454	0	0.15236	0	0.420137	0	0.221681	0	0.532883	0		NA	0	0	NA	0	0	0	0		NA	0	NA	0	0
AC188128.3_FG002	NA	NA	NA	NA	0		NA	0		0			NA	0	NA	0	NA	0	NA	0	NA	0	NA	0		NA	0	0	NA	0	0	0	0		NA	0	NA	0	0
AC188134.2_FG011	4	4	4	0.537662	0		0.66287	0		0			0.294528	0	0.461714	0	0.415214	0	0.325811	0	0.482645	0	0.722772	0		NA	0	0	NA	0	0	0	0		NA	0	NA	0	0
AC188195.2_FG003	NA	NA	NA	NA	0		NA	0		0			NA	0	NA	0	NA	0	NA	0	NA	0	NA	0		NA	0	0	NA	0	0	0	0		NA	0	NA	0	0
AC188195.2_FG004	NA	NA	NA	NA	0		NA	0		0			NA	0	NA	0	NA	0	NA	0	NA	0	NA	0		NA	0	0	NA	0	0	0	0		NA	0	NA	0	0
AC188195.2_FG005	NA	NA	NA	NA	0		NA	0		0			NA	0	NA	0	NA	0	NA	0	NA	0	NA	0		NA	0	0	NA	0	0	0	0		NA	0	NA	0	0
AC188296.3_FG004	4	4	4	0.510185	0		0.683478	0		0			0.0685887	0	0.522159	0	0.2349	0	0.162744	0	0.372362	0	0.649522	0		NA	0	0	NA	0	0	0	0		NA	0	NA	0	0
AC188582.3_FG002	NA	NA	NA	NA	0		NA	0		0			NA	0	NA	0	NA	0	NA	0	NA	0	NA	0		NA	0	0	NA	0	0	0	0		NA	0	NA	0	0
AC188583.4_FG003	1	1	1	0.31246	0		0.185559	0		0			9.18909e-08	1	0.00242804	1	0.00043514	1	0.00374323	1	0.0157527	1	0.688093	0		0.614928	0	0	0.54054	0	0	0	0		0.193918	0	0.165649	0	0
AC188612.3_FG009	NA	NA	NA	NA	0		NA	0		0			NA	0	NA	0	NA	0	NA	0	NA	0	NA	0		NA	0	0	NA	0	0	0	0		NA	0	NA	0	0
AC188710.4_FG006	3	3	3	0.462986	0		0.501153	0		0			0.000462857	1	0.0481598	1	0.0294211	1	0.140249	0	0.1832	0	0.780165	0		NA	0	0	NA	0	0	0	0		NA	0	NA	0	0
AC188718.3_FG005	NA	NA	NA	NA	0		NA	0		0			NA	0	NA	0	NA	0	NA	0	NA	0	NA	0		NA	0	0	NA	0	0	0	0		NA	0	NA	0	0
AC188718.3_FG011	NA	NA	NA	NA	0		NA	0		0			NA	0	NA	0	NA	0	NA	0	NA	0	NA	0		NA	0	0	NA	0	0	0	0		NA	0	NA	0	0
AC188718.3_FG015	NA	NA	NA	NA	0		NA	0		0			NA	0	NA	0	NA	0	NA	0	NA	0	NA	0		NA	0	0	NA	0	0	0	0		NA	0	NA	0	0
AC188721.3_FG001	NA	NA	NA	NA	0		NA	0		0			NA	0	NA	0	NA	0	NA	0	NA	0	NA	0		NA	0	0	NA	0	0	0	0		NA	0	NA	0	0
AC188722.3_FG002	NA	NA	NA	NA	0		NA	0		0			NA	0	NA	0	NA	0	NA	0	NA	0	NA	0		NA	0	0	NA	0	0	0	0		NA	0	NA	0	0
AC188723.3_FG001	NA	NA	NA	NA	0		NA	0		0			NA	0	NA	0	NA	0	NA	0	NA	0	NA	0		NA	0	0	NA	0	0	0	0		NA	0	NA	0	0
AC188724.3_FG006	NA	NA	NA	NA	0		NA	0		0			NA	0	NA	0	NA	0	NA	0	NA	0	NA	0		NA	0	0	NA	0	0	0	0		NA	0	NA	0	0
AC188727.3_FG003	4	0		0.0772891	0		0.210935	0		0			0.192391	0	0.140457	0	0.17832	0	0.0421749	1	0.121778	0	0.668821	0		NA	0	0	NA	0	0	0	0		NA	0	NA	0	0
AC188735.3_FG001	NA	NA	NA	NA	0		NA	0		0			NA	0	NA	0	NA	0	NA	0	NA	0	NA	0		NA	0	0	NA	0	0	0	0		NA	0	NA	0	0
AC188744.3_FG009	NA	NA	NA	NA	0		NA	0		0			NA	0	NA	0	NA	0	NA	0	NA	0	NA	0		NA	0	0	NA	0	0	0	0		NA	0	NA	0	0
AC188745.3_FG001	NA	NA	NA	NA	0		NA	0		0			NA	0	NA	0	NA	0	NA	0	NA	0	NA	0		NA	0	0	NA	0	0	0	0		NA	0	NA	0	0
AC188752.3_FG008	NA	NA	NA	NA	0		NA	0		0			NA	0	NA	0	NA	0	NA	0	NA	0	NA	0		NA	0	0	NA	0	0	0	0		NA	0	NA	0	0
AC188753.3_FG004	NA	NA	NA	NA	0		NA	0		0			NA	0	NA	0	NA	0	NA	0	NA	0	NA	0		NA	0	0	NA	0	0	0	0		NA	0	NA	0	0
AC188755.3_FG001	NA	NA	NA	NA	0		NA	0		0			NA	0	NA	0	NA	0	NA	0	NA	0	NA	0		NA	0	0	NA	0	0	0	0		NA	0	NA	0	0
AC188756.2_FG004	NA	NA	NA	NA	0		NA	0		0			NA	0	NA	0	NA	0	NA	0	NA	0	NA	0		NA	0	0	NA	0	0	0	0		NA	0	NA	0	0
AC188757.4_FG004	NA	NA	NA	NA	0		NA	0		0			NA	0	NA	0	NA	0	NA	0	NA	0	NA	0		NA	0	0	NA	0	0	0	0		NA	0	NA	0	0
AC188831.3_FG005	2	3		0.308718	0		0.376704	0		0			0.00131043	1	0.376586	0	0.00673809	1	0.016687	1	0.434292	0	0.225342	0		0.526499	0	0	0.673867	0	0	0	0		0.0442596	1	0.13878	0	0
AC188838.3_FG005	1	1	1	0.0808805	0		0.467095	0		0			9.3884e-18	1	0.0345252	1	0.000663351	1	2.25798e-09	1	2.0529e-06	1	0.501285	0		0.415754	0	0	0.030703	1	0	0	0		7.22339e-23	1	2.70441e-14	1	1
AC188964.3_FG002	0	0	0	0.446378	0		0.697785	0		0			0.015156	1	0.136763	0	0.212415	0	0.285325	0	0.164305	0	0.619161	0		NA	0	0	NA	0	0	0	0		NA	0	NA	0	0
AC188978.3_FG008	NA	NA	NA	NA	0		NA	0		0			NA	0	NA	0	NA	0	NA	0	NA	0	NA	0		NA	0	0	NA	0	0	0	0		NA	0	NA	0	0
AC189044.2_FG005	0	2		0.415876	0		0.593276	0		0			0.00628275	1	0.50466	0	0.0965904	0	0.0267649	1	0.256902	0	0.473518	0		NA	0	0	NA	0	0	0	0		NA	0	NA	0	0
AC189048.2_FG001	NA	NA	NA	NA	0		NA	0		0			NA	0	NA	0	NA	0	NA	0	NA	0	NA	0		NA	0	0	NA	0	0	0	0		NA	0	NA	0	0
AC189052.3_FG003	4	4	4	0.228363	0		0.448884	0		0			0.0534511	0	0.10036	0	0.123412	0	0.327659	0	0.486536	0	0.664827	0		NA	0	0	NA	0	0	0	0		NA	0	NA	0	0
AC189056.3_FG001	NA	NA	NA	NA	0		NA	0		0			NA	0	NA	0	NA	0	NA	0	NA	0	NA	0		NA	0	0	NA	0	0	0	0		NA	0	NA	0	0
AC189060.4_FG007	NA	NA	NA	NA	0		NA	0		0			NA	0	NA	0	NA	0	NA	0	NA	0	NA	0		NA	0	0	NA	0	0	0	0		NA	0	NA	0	0
AC189078.3_FG004	NA	NA	NA	NA	0		NA	0		0			NA	0	NA	0	NA	0	NA	0	NA	0	NA	0		NA	0	0	NA	0	0	0	0		NA	0	NA	0	0
AC189084.3_FG002	NA	NA	NA	NA	0		NA	0		0			NA	0	NA	0	NA	0	NA	0	NA	0	NA	0		NA	0	0	NA	0	0	0	0		NA	0	NA	0	0
AC189280.3_FG001	2	2	2	0.347316	0		0.647949	0		0			0.00162588	1	0.0588738	0	0.102562	0	0.0333892	1	0.00626353	1	0.535857	0		NA	0	0	NA	0	0	0	0		NA	0	NA	0	0
AC189694.3_FG003	NA	NA	NA	NA	0		NA	0		0			NA	0	NA	0	NA	0	NA	0	NA	0	NA	0		NA	0	0	NA	0	0	0	0		NA	0	NA	0	0
AC189750.4_FG004	3	2		0.0541201	0		0.156308	0		0			0.0479878	1	0.00796266	1	0.237059	0	0.118838	0	0.0222332	1	0.00816859	1		0.373634	0	0	0.691035	0	0	0	0		0.395535	0	0.00837918	1	0
AC189752.3_FG003	NA	NA	NA	NA	0		NA	0		0			NA	0	NA	0	NA	0	NA	0	NA	0	NA	0		NA	0	0	NA	0	0	0	0		NA	0	NA	0	0
AC189753.3_FG002	NA	NA	NA	NA	0		NA	0		0			NA	0	NA	0	NA	0	NA	0	NA	0	NA	0		NA	0	0	NA	0	0	0	0		NA	0	NA	0	0
AC189770.3_FG002	3	2		0.470693	0		0.412242	0		0			0.000197932	1	0.00775194	1	0.114036	0	0.200466	0	0.020922	1	0.363915	0		0.659928	0	0	0.626387	0	0	0	0		0.119741	0	0.158972	0	0
AC189771.3_FG001	NA	NA	NA	NA	0		NA	0		0			NA	0	NA	0	NA	0	NA	0	NA	0	NA	0		NA	0	0	NA	0	0	0	0		NA	0	NA	0	0
AC189792.3_FG005	4	4	4	0.36267	0		0.684679	0		0			0.24748	0	0.338563	0	0.435214	0	0.161518	0	0.468152	0	0.560532	0		NA	0	0	NA	0	0	0	0		NA	0	NA	0	0
AC189795.3_FG001	4	4	4	0.585913	0		0.59358	0		0			0.200935	0	0.569523	0	0.289062	0	0.295414	0	0.482076	0	0.627604	0		NA	0	0	NA	0	0	0	0		NA	0	NA	0	0
AC189796.3_FG004	NA	NA	NA	NA	0		NA	0		0			NA	0	NA	0	NA	0	NA	0	NA	0	NA	0		NA	0	0	NA	0	0	0	0		NA	0	NA	0	0
AC189879.3_FG003	4	0		0.046261	1	0	0.582408	0		0			0.160384	0	0.0201144	1	0.432758	0	0.05249	0	0.300871	0	0.110211	0		0.597089	0	0	0.425357	0	0	0	0		0.0519104	0	0.0100241	1	0
AC189883.3_FG002	4	4	4	0.0915183	0		0.243959	0		0			0.288928	0	0.111718	0	0.143108	0	0.0709462	0	0.189771	0	0.665521	0		NA	0	0	NA	0	0	0	0		NA	0	NA	0	0
AC190035.1_FG005	NA	NA	NA	NA	0		NA	0		0			NA	0	NA	0	NA	0	NA	0	NA	0	NA	0		NA	0	0	NA	0	0	0	0		NA	0	NA	0	0
AC190225.2_FG001	NA	NA	NA	NA	0		NA	0		0			NA	0	NA	0	NA	0	NA	0	NA	0	NA	0		NA	0	0	NA	0	0	0	0		NA	0	NA	0	0
AC190480.1_FG007	4	4	4	0.511975	0		0.514844	0		0			0.105305	0	0.266543	0	0.157404	0	0.419445	0	0.481061	0	0.765839	0		NA	0	0	NA	0	0	0	0		NA	0	NA	0	0
AC190485.1_FG004	NA	NA	NA	NA	0		NA	0		0			NA	0	NA	0	NA	0	NA	0	NA	0	NA	0		NA	0	0	NA	0	0	0	0		NA	0	NA	0	0
AC190491.1_FG002	4	4	4	0.657123	0		0.556925	0		0			0.0731499	0	0.404734	0	0.154776	0	0.271201	0	0.494522	0	0.660648	0		NA	0	0	NA	0	0	0	0		NA	0	NA	0	0
AC190496.1_FG002	3	3	3	0.0880042	0		0.0658191	0		0			6.96252e-06	1	0.0968667	0	0.080683	0	0.00076989	1	0.000758123	1	0.754609	0		NA	0	0	NA	0	0	0	0		NA	0	NA	0	0
AC190498.1_FG007	NA	NA	NA	NA	0		NA	0		0			NA	0	NA	0	NA	0	NA	0	NA	0	NA	0		NA	0	0	NA	0	0	0	0		NA	0	NA	0	0
AC190507.1_FG007	NA	NA	NA	NA	0		NA	0		0			NA	0	NA	0	NA	0	NA	0	NA	0	NA	0		NA	0	0	NA	0	0	0	0		NA	0	NA	0	0
AC190526.3_FG004	1	1	1	0.00270233	1	1	0.0143702	1	1	1	1		3.69992e-06	1	0.0101191	1	2.94106e-05	1	8.08741e-05	1	0.000332482	1	0.395795	0		NA	0	0	NA	0	0	0	0		NA	0	NA	0	0
AC190544.2_FG004	1	1	1	5.94304e-05	1	1	0.00158112	1	1	1	1		1.35685e-10	1	0.00225863	1	1.38568e-06	1	6.53323e-08	1	9.12687e-07	1	0.356816	0		0.631234	0	0	0.631017	0	0	0	0		0.0891335	0	0.0894752	0	0
AC190549.3_FG004	NA	NA	NA	NA	0		NA	0		0			NA	0	NA	0	NA	0	NA	0	NA	0	NA	0		NA	0	0	NA	0	0	0	0		NA	0	NA	0	0
AC190560.2_FG002	NA	NA	NA	NA	0		NA	0		0			NA	0	NA	0	NA	0	NA	0	NA	0	NA	0		NA	0	0	NA	0	0	0	0		NA	0	NA	0	0
AC190565.2_FG003	NA	NA	NA	NA	0		NA	0		0			NA	0	NA	0	NA	0	NA	0	NA	0	NA	0		NA	0	0	NA	0	0	0	0		NA	0	NA	0	0
AC190570.3_FG003	NA	NA	NA	NA	0		NA	0		0			NA	0	NA	0	NA	0	NA	0	NA	0	NA	0		NA	0	0	NA	0	0	0	0		NA	0	NA	0	0
AC190572.4_FG001	4	4	4	0.432393	0		0.437831	0		0			0.29572	0	0.364483	0	0.233527	0	0.234448	0	0.276122	0	0.766746	0		NA	0	0	NA	0	0	0	0		NA	0	NA	0	0
AC190576.2_FG002	NA	NA	NA	NA	0		NA	0		0			NA	0	NA	0	NA	0	NA	0	NA	0	NA	0		NA	0	0	NA	0	0	0	0		NA	0	NA	0	0
AC190587.3_FG005	4	4	4	0.242181	0		0.533793	0		0			0.136388	0	0.248932	0	0.211757	0	0.0631202	0	0.489961	0	0.315465	0		NA	0	0	NA	0	0	0	0		NA	0	NA	0	0
AC190589.2_FG002	NA	NA	NA	NA	0		NA	0		0			NA	0	NA	0	NA	0	NA	0	NA	0	NA	0		NA	0	0	NA	0	0	0	0		NA	0	NA	0	0
AC190590.3_FG001	4	4	4	0.662631	0		0.266384	0		0			0.210611	0	0.532531	0	0.112416	0	0.371412	0	0.241578	0	0.465808	0		NA	0	0	NA	0	0	0	0		NA	0	NA	0	0
AC190609.3_FG001	0	0	0	0.627915	0		0.676759	0		0			0.00821708	1	0.22144	0	0.199717	0	0.162416	0	0.152935	0	0.734228	0		NA	0	0	NA	0	0	0	0		NA	0	NA	0	0
AC190609.3_FG002	4	4	4	0.45247	0		0.503421	0		0			0.118659	0	0.526356	0	0.408152	0	0.147065	0	0.20543	0	0.774164	0		0.6958	0	0	0.505451	0	0	0	0		0.0027693	1	5.96969e-05	1	1
AC190609.3_FG003	4	4	4	0.533181	0		0.615749	0		0			0.0784528	0	0.548243	0	0.379335	0	0.164756	0	0.258676	0	0.757742	0		NA	0	0	NA	0	0	0	0		NA	0	NA	0	0
AC190609.3_FG004	0	0	0	0.648064	0		0.577106	0		0			0.00241122	1	0.203653	0	0.216384	0	0.102352	0	0.0741895	0	0.708434	0		NA	0	0	NA	0	0	0	0		NA	0	NA	0	0
AC190609.3_FG005	4	4	4	0.555707	0		0.639386	0		0			0.295236	0	0.484395	0	0.392033	0	0.333833	0	0.460385	0	0.645415	0		NA	0	0	NA	0	0	0	0		NA	0	NA	0	0
AC190613.3_FG001	2	2	2	0.664286	0		0.677605	0		0			0.00108471	1	0.194535	0	0.10984	0	0.0212281	1	0.0340341	1	0.765058	0		NA	0	0	NA	0	0	0	0		NA	0	NA	0	0
AC190614.3_FG004	NA	NA	NA	NA	0		NA	0		0			NA	0	NA	0	NA	0	NA	0	NA	0	NA	0		NA	0	0	NA	0	0	0	0		NA	0	NA	0	0
AC190623.3_FG001	0	4		0.639102	0		0.0900905	0		0			0.131847	0	0.439546	0	0.0916384	0	0.348953	0	0.0205652	1	0.230079	0		0.35376	0	0	0.718056	0	0	0	0		0.188255	0	0.28018	0	0
AC190623.3_FG002	3	0		0.607872	0		0.161276	0		0			0.000626835	1	0.0997842	0	0.00202185	1	0.111479	0	0.512923	0	0.436981	0		0.346091	0	0	0.405132	0	0	0	0		1.47856e-05	1	1.76072e-09	1	1
AC190628.4_FG007	0	2		0.18098	0		0.668594	0		0			0.0289726	1	0.416433	0	0.262055	0	0.0150374	1	0.238747	0	0.436599	0		0.251434	0	0	0.600056	0	0	0	0		0.0750061	0	0.388878	0	0
AC190630.2_FG001	NA	NA	NA	NA	0		NA	0		0			NA	0	NA	0	NA	0	NA	0	NA	0	NA	0		NA	0	0	NA	0	0	0	0		NA	0	NA	0	0
AC190632.2_FG004	0	0	0	0.629028	0		0.642145	0		0			0.0329955	1	0.408837	0	0.309129	0	0.142323	0	0.169459	0	0.766746	0		NA	0	0	NA	0	0	0	0		NA	0	NA	0	0
AC190634.1_FG005	NA	NA	NA	NA	0		NA	0		0			NA	0	NA	0	NA	0	NA	0	NA	0	NA	0		NA	0	0	NA	0	0	0	0		NA	0	NA	0	0
AC190636.3_FG005	2	0		0.626315	0		0.179622	0		0			0.046232	1	0.416433	0	0.0203845	1	0.203045	0	0.307849	0	0.334342	0		0.186993	0	0	0.209496	0	0	0	0		0.201735	0	0.244896	0	0
AC190638.3_FG001	NA	NA	NA	NA	0		NA	0		0			NA	0	NA	0	NA	0	NA	0	NA	0	NA	0		NA	0	0	NA	0	0	0	0		NA	0	NA	0	0
AC190643.4_FG011	NA	NA	NA	NA	0		NA	0		0			NA	0	NA	0	NA	0	NA	0	NA	0	NA	0		NA	0	0	NA	0	0	0	0		NA	0	NA	0	0
AC190652.3_FG001	0	0	0	0.656997	0		0.532435	0		0			0.00289419	1	0.204255	0	0.0572486	0	0.0955852	0	0.255577	0	0.66763	0		NA	0	0	NA	0	0	0	0		NA	0	NA	0	0
AC190665.3_FG006	NA	NA	NA	NA	0		NA	0		0			NA	0	NA	0	NA	0	NA	0	NA	0	NA	0		NA	0	0	NA	0	0	0	0		NA	0	NA	0	0
AC190671.4_FG003	NA	NA	NA	NA	0		NA	0		0			NA	0	NA	0	NA	0	NA	0	NA	0	NA	0		NA	0	0	NA	0	0	0	0		NA	0	NA	0	0
AC190677.3_FG003	NA	NA	NA	NA	0		NA	0		0			NA	0	NA	0	NA	0	NA	0	NA	0	NA	0		NA	0	0	NA	0	0	0	0		NA	0	NA	0	0
AC190685.3_FG005	NA	NA	NA	NA	0		NA	0		0			NA	0	NA	0	NA	0	NA	0	NA	0	NA	0		NA	0	0	NA	0	0	0	0		NA	0	NA	0	0
AC190688.3_FG006	4	4	4	0.577911	0		0.683416	0		0			0.0888093	0	0.336699	0	0.331176	0	0.358898	0	0.326724	0	0.702682	0		NA	0	0	NA	0	0	0	0		NA	0	NA	0	0
AC190693.1_FG009	NA	NA	NA	NA	0		NA	0		0			NA	0	NA	0	NA	0	NA	0	NA	0	NA	0		NA	0	0	NA	0	0	0	0		NA	0	NA	0	0
AC190695.3_FG003	NA	NA	NA	NA	0		NA	0		0			NA	0	NA	0	NA	0	NA	0	NA	0	NA	0		NA	0	0	NA	0	0	0	0		NA	0	NA	0	0
AC190701.3_FG001	4	4	4	0.476845	0		0.648687	0		0			0.265745	0	0.431475	0	0.382044	0	0.249904	0	0.488432	0	0.587205	0		NA	0	0	NA	0	0	0	0		NA	0	NA	0	0
AC190716.3_FG001	NA	NA	NA	NA	0		NA	0		0			NA	0	NA	0	NA	0	NA	0	NA	0	NA	0		NA	0	0	NA	0	0	0	0		NA	0	NA	0	0
AC190734.2_FG003	NA	NA	NA	NA	0		NA	0		0			NA	0	NA	0	NA	0	NA	0	NA	0	NA	0		NA	0	0	NA	0	0	0	0		NA	0	NA	0	0
AC190740.2_FG004	NA	NA	NA	NA	0		NA	0		0			NA	0	NA	0	NA	0	NA	0	NA	0	NA	0		NA	0	0	NA	0	0	0	0		NA	0	NA	0	0
AC190743.3_FG012	0	0	0	0.621532	0		0.433924	0		0			0.0428643	1	0.422987	0	0.0858575	0	0.186209	0	0.512673	0	0.538212	0		NA	0	0	NA	0	0	0	0		NA	0	NA	0	0
AC190744.2_FG010	NA	NA	NA	NA	0		NA	0		0			NA	0	NA	0	NA	0	NA	0	NA	0	NA	0		NA	0	0	NA	0	0	0	0		NA	0	NA	0	0
AC190749.3_FG006	NA	NA	NA	NA	0		NA	0		0			NA	0	NA	0	NA	0	NA	0	NA	0	NA	0		NA	0	0	NA	0	0	0	0		NA	0	NA	0	0
AC190750.2_FG014	2	0		0.493733	0		0.388854	0		0			0.00652745	1	0.0933623	0	0.0269176	1	0.287543	0	0.464406	0	0.710473	0		NA	0	0	NA	0	0	0	0		NA	0	NA	0	0
AC190751.4_FG008	NA	NA	NA	NA	0		NA	0		0			NA	0	NA	0	NA	0	NA	0	NA	0	NA	0		NA	0	0	NA	0	0	0	0		NA	0	NA	0	0
AC190756.4_FG007	NA	NA	NA	NA	0		NA	0		0			NA	0	NA	0	NA	0	NA	0	NA	0	NA	0		NA	0	0	NA	0	0	0	0		NA	0	NA	0	0
AC190757.3_FG001	4	4	4	0.310682	0		0.631611	0		0			0.291043	0	0.289516	0	0.395659	0	0.170049	0	0.445801	0	0.599397	0		NA	0	0	NA	0	0	0	0		NA	0	NA	0	0
AC190763.3_FG002	NA	NA	NA	NA	0		NA	0		0			NA	0	NA	0	NA	0	NA	0	NA	0	NA	0		NA	0	0	NA	0	0	0	0		NA	0	NA	0	0
AC190771.2_FG003	NA	NA	NA	NA	0		NA	0		0			NA	0	NA	0	NA	0	NA	0	NA	0	NA	0		NA	0	0	NA	0	0	0	0		NA	0	NA	0	0
AC190772.4_FG011	0	2		0.0543933	0		0.50228	0		0			0.0263437	1	0.188327	0	0.402889	0	0.00251798	1	0.10324	0	0.370821	0		NA	0	0	NA	0	0	0	0		NA	0	NA	0	0
AC190788.2_FG004	NA	NA	NA	NA	0		NA	0		0			NA	0	NA	0	NA	0	NA	0	NA	0	NA	0		NA	0	0	NA	0	0	0	0		NA	0	NA	0	0
AC190788.2_FG005	0	3		0.00300817	1	3	0.631934	0		0			0.00992726	1	0.000903877	1	0.138854	0	0.0728141	0	0.218024	0	0.0947875	0		NA	0	0	NA	0	0	0	0		NA	0	NA	0	0
AC190789.3_FG005	NA	NA	NA	NA	0		NA	0		0			NA	0	NA	0	NA	0	NA	0	NA	0	NA	0		NA	0	0	NA	0	0	0	0		NA	0	NA	0	0
AC190792.2_FG006	1	1	1	0.0112903	1	1	0.0300999	1	1	1	1		2.54549e-06	1	4.42449e-05	1	3.11074e-07	1	0.000173768	1	0.000491229	1	0.55959	0		NA	0	0	NA	0	0	0	0		NA	0	NA	0	0
AC190799.2_FG010	NA	NA	NA	NA	0		NA	0		0			NA	0	NA	0	NA	0	NA	0	NA	0	NA	0		NA	0	0	NA	0	0	0	0		NA	0	NA	0	0
AC190807.2_FG001	NA	NA	NA	NA	0		NA	0		0			NA	0	NA	0	NA	0	NA	0	NA	0	NA	0		NA	0	0	NA	0	0	0	0		NA	0	NA	0	0
AC190809.2_FG002	NA	NA	NA	NA	0		NA	0		0			NA	0	NA	0	NA	0	NA	0	NA	0	NA	0		NA	0	0	NA	0	0	0	0		NA	0	NA	0	0
AC190811.1_FG003	NA	NA	NA	NA	0		NA	0		0			NA	0	NA	0	NA	0	NA	0	NA	0	NA	0		NA	0	0	NA	0	0	0	0		NA	0	NA	0	0
AC190812.3_FG006	NA	NA	NA	NA	0		NA	0		0			NA	0	NA	0	NA	0	NA	0	NA	0	NA	0		NA	0	0	NA	0	0	0	0		NA	0	NA	0	0
AC190816.3_FG007	NA	NA	NA	NA	0		NA	0		0			NA	0	NA	0	NA	0	NA	0	NA	0	NA	0		NA	0	0	NA	0	0	0	0		NA	0	NA	0	0
AC190832.2_FG003	NA	NA	NA	NA	0		NA	0		0			NA	0	NA	0	NA	0	NA	0	NA	0	NA	0		NA	0	0	NA	0	0	0	0		NA	0	NA	0	0
AC190832.2_FG006	NA	NA	NA	NA	0		NA	0		0			NA	0	NA	0	NA	0	NA	0	NA	0	NA	0		NA	0	0	NA	0	0	0	0		NA	0	NA	0	0
AC190834.3_FG005	NA	NA	NA	NA	0		NA	0		0			NA	0	NA	0	NA	0	NA	0	NA	0	NA	0		NA	0	0	NA	0	0	0	0		NA	0	NA	0	0
AC190841.2_FG007	4	0		0.239768	0		0.6102	0		0			0.0632397	0	0.436152	0	0.356237	0	0.0435737	1	0.244262	0	0.55783	0		0.366207	0	0	0.618614	0	0	0	0		0.0572764	0	0.227397	0	0
AC190851.3_FG003	NA	NA	NA	NA	0		NA	0		0			NA	0	NA	0	NA	0	NA	0	NA	0	NA	0		NA	0	0	NA	0	0	0	0		NA	0	NA	0	0
AC190858.3_FG004	NA	NA	NA	NA	0		NA	0		0			NA	0	NA	0	NA	0	NA	0	NA	0	NA	0		NA	0	0	NA	0	0	0	0		NA	0	NA	0	0
AC190858.3_FG005	NA	NA	NA	NA	0		NA	0		0			NA	0	NA	0	NA	0	NA	0	NA	0	NA	0		NA	0	0	NA	0	0	0	0		NA	0	NA	0	0
AC190882.3_FG003	0	4		0.593859	0		0.276243	0		0			0.0533385	0	0.301523	0	0.306307	0	0.314029	0	0.0476213	1	0.374321	0		NA	0	0	NA	0	0	0	0		NA	0	NA	0	0
AC190883.2_FG005	0	0	0	0.664777	0		0.655109	0		0			0.0127496	1	0.301808	0	0.169104	0	0.0936133	0	0.157611	0	0.751465	0		NA	0	0	NA	0	0	0	0		NA	0	NA	0	0
AC190885.4_FG006	1	1	1	0.322842	0		0.188057	0		0			2.60069e-16	1	5.48631e-12	1	1.41313e-13	1	0.00947756	1	0.0395335	1	0.678102	0		NA	0	0	NA	0	0	0	0		NA	0	NA	0	0
AC190909.3_FG004	0	2		0.327782	0		0.654189	0		0			0.00835977	1	0.56071	0	0.132925	0	0.022293	1	0.249285	0	0.473037	0		NA	0	0	NA	0	0	0	0		NA	0	NA	0	0
AC190913.3_FG002	NA	NA	NA	NA	0		NA	0		0			NA	0	NA	0	NA	0	NA	0	NA	0	NA	0		NA	0	0	NA	0	0	0	0		NA	0	NA	0	0
AC190915.3_FG007	NA	NA	NA	NA	0		NA	0		0			NA	0	NA	0	NA	0	NA	0	NA	0	NA	0		NA	0	0	NA	0	0	0	0		NA	0	NA	0	0
AC190922.3_FG007	4	0		0.0340555	1	0	0.576609	0		0			0.128221	0	0.0550129	0	0.227472	0	0.00498622	1	0.513401	0	0.0776455	0		NA	0	0	NA	0	0	0	0		NA	0	NA	0	0
AC190925.2_FG002	0	0	0	0.519024	0		0.617206	0		0			0.0106093	1	0.140376	0	0.122617	0	0.269345	0	0.280324	0	0.746249	0		NA	0	0	NA	0	0	0	0		NA	0	NA	0	0
AC190932.3_FG008	NA	NA	NA	NA	0		NA	0		0			NA	0	NA	0	NA	0	NA	0	NA	0	NA	0		NA	0	0	NA	0	0	0	0		NA	0	NA	0	0
AC190933.3_FG004	1	1	1	0.106463	0		0.298295	0		0			5.34533e-15	1	0.0188605	1	3.071e-08	1	1.67205e-07	1	0.0238848	1	0.046557	1		0.715291	0	0	0.651441	0	0	0	0		1.39482e-06	1	0.00165679	1	1
AC190934.3_FG003	NA	NA	NA	NA	0		NA	0		0			NA	0	NA	0	NA	0	NA	0	NA	0	NA	0		NA	0	0	NA	0	0	0	0		NA	0	NA	0	0
AC190978.3_FG007	NA	NA	NA	NA	0		NA	0		0			NA	0	NA	0	NA	0	NA	0	NA	0	NA	0		NA	0	0	NA	0	0	0	0		NA	0	NA	0	0
AC190985.3_FG006	4	4	4	0.628783	0		0.278243	0		0			0.0957278	0	0.379278	0	0.287161	0	0.339004	0	0.08382	0	0.428832	0		NA	0	0	NA	0	0	0	0		NA	0	NA	0	0
AC190990.2_FG005	NA	NA	NA	NA	0		NA	0		0			NA	0	NA	0	NA	0	NA	0	NA	0	NA	0		NA	0	0	NA	0	0	0	0		NA	0	NA	0	0
AC190999.2_FG004	3	0		0.551365	0		0.226036	0		0			0.00233454	1	0.312961	0	0.00641728	1	0.0523852	0	0.515019	0	0.303468	0		NA	0	0	NA	0	0	0	0		NA	0	NA	0	0
AC191009.3_FG004	0	0	0	0.516833	0		0.684892	0		0			0.00286847	1	0.0873666	0	0.119064	0	0.223949	0	0.165775	0	0.688406	0		0.0145836	1	0	0.504163	0	0	0	0		0.0283457	1	0.0428384	1	1
AC191012.2_FG001	4	4	4	0.291365	0		0.647722	0		0			0.217414	0	0.298507	0	0.450617	0	0.108923	0	0.408503	0	0.542096	0		NA	0	0	NA	0	0	0	0		NA	0	NA	0	0
AC191040.2_FG002	4	4	4	0.648998	0		0.678418	0		0			0.219383	0	0.516665	0	0.381917	0	0.398178	0	0.485574	0	0.778313	0		NA	0	0	NA	0	0	0	0		NA	0	NA	0	0
AC191042.4_FG001	3	0		0.319358	0		0.263204	0		0			0.0068541	1	0.0682358	0	0.0294911	1	0.289882	0	0.428605	0	0.738261	0		NA	0	0	NA	0	0	0	0		NA	0	NA	0	0
AC191048.2_FG006	2	3		0.262144	0		0.506313	0		0			0.00286257	1	0.543399	0	0.0367015	1	0.0103175	1	0.341448	0	0.277026	0		NA	0	0	NA	0	0	0	0		NA	0	NA	0	0
AC191049.3_FG007	NA	NA	NA	NA	0		NA	0		0			NA	0	NA	0	NA	0	NA	0	NA	0	NA	0		NA	0	0	NA	0	0	0	0		NA	0	NA	0	0
AC191050.3_FG003	3	0		0.398253	0		0.0351142	1	3	0			0.0020649	1	0.0672166	0	0.00316652	1	0.140321	0	0.43132	0	0.378504	0		NA	0	0	NA	0	0	0	0		NA	0	NA	0	0
AC191064.3_FG007	NA	NA	NA	NA	0		NA	0		0			NA	0	NA	0	NA	0	NA	0	NA	0	NA	0		NA	0	0	NA	0	0	0	0		NA	0	NA	0	0
AC191067.3_FG005	NA	NA	NA	NA	0		NA	0		0			NA	0	NA	0	NA	0	NA	0	NA	0	NA	0		NA	0	0	NA	0	0	0	0		NA	0	NA	0	0
AC191069.3_FG004	4	4	4	0.388335	0		0.568822	0		0			0.097095	0	0.49883	0	0.436481	0	0.10137	0	0.234491	0	0.703072	0		0.548227	0	0	0.386052	0	0	0	0		0.0354729	1	0.00362404	1	1
AC191069.3_FG007	NA	NA	NA	NA	0		NA	0		0			NA	0	NA	0	NA	0	NA	0	NA	0	NA	0		NA	0	0	NA	0	0	0	0		NA	0	NA	0	0
AC191070.3_FG006	NA	NA	NA	NA	0		NA	0		0			NA	0	NA	0	NA	0	NA	0	NA	0	NA	0		NA	0	0	NA	0	0	0	0		NA	0	NA	0	0
AC191071.3_FG001	NA	NA	NA	NA	0		NA	0		0			NA	0	NA	0	NA	0	NA	0	NA	0	NA	0		NA	0	0	NA	0	0	0	0		NA	0	NA	0	0
AC191073.2_FG001	NA	NA	NA	NA	0		NA	0		0			NA	0	NA	0	NA	0	NA	0	NA	0	NA	0		NA	0	0	NA	0	0	0	0		NA	0	NA	0	0
AC191073.2_FG003	0	0	0	0.417848	0		0.623386	0		0			0.0136923	1	0.127787	0	0.27945	0	0.257947	0	0.0823026	0	0.502971	0		NA	0	0	NA	0	0	0	0		NA	0	NA	0	0
AC191097.3_FG007	4	4	4	0.499323	0		0.379498	0		0			0.264101	0	0.452951	0	0.190257	0	0.264977	0	0.278185	0	0.382857	0		NA	0	0	NA	0	0	0	0		NA	0	NA	0	0
AC191098.3_FG002	NA	NA	NA	NA	0		NA	0		0			NA	0	NA	0	NA	0	NA	0	NA	0	NA	0		NA	0	0	NA	0	0	0	0		NA	0	NA	0	0
AC191107.4_FG001	NA	NA	NA	NA	0		NA	0		0			NA	0	NA	0	NA	0	NA	0	NA	0	NA	0		NA	0	0	NA	0	0	0	0		NA	0	NA	0	0
AC191107.4_FG002	NA	NA	NA	NA	0		NA	0		0			NA	0	NA	0	NA	0	NA	0	NA	0	NA	0		NA	0	0	NA	0	0	0	0		NA	0	NA	0	0
AC191113.2_FG002	4	4	4	0.525501	0		0.342976	0		0			0.0798284	0	0.262122	0	0.0728727	0	0.404716	0	0.391452	0	0.656716	0		0.438638	0	0	0.730075	0	0	0	0		0.0656719	0	0.00104634	1	0
AC191115.3_FG002	2	2	2	0.117029	0		0.29353	0		0			0.0399841	1	0.253442	0	0.327286	0	0.00845452	1	0.0416091	1	0.634821	0		NA	0	0	NA	0	0	0	0		NA	0	NA	0	0
AC191147.3_FG002	NA	NA	NA	NA	0		NA	0		0			NA	0	NA	0	NA	0	NA	0	NA	0	NA	0		NA	0	0	NA	0	0	0	0		NA	0	NA	0	0
AC191246.3_FG004	NA	NA	NA	NA	0		NA	0		0			NA	0	NA	0	NA	0	NA	0	NA	0	NA	0		NA	0	0	NA	0	0	0	0		NA	0	NA	0	0
AC191246.3_FG006	4	4	4	0.426213	0		0.389204	0		0			0.11354	0	0.217972	0	0.110006	0	0.365388	0	0.395815	0	0.751061	0		0.418442	0	0	0.54054	0	0	0	0		0.244245	0	0.404965	0	0
AC191251.3_FG005	3	3	3	0.0971891	0		0.095031	0		0			0.00374651	1	0.00434001	1	0.00236828	1	0.320077	0	0.393646	0	0.780468	0		0.629072	0	0	0.735507	0	0	0	0		0.0237331	1	0.0982028	0	0
AC191253.3_FG004	NA	NA	NA	NA	0		NA	0		0			NA	0	NA	0	NA	0	NA	0	NA	0	NA	0		NA	0	0	NA	0	0	0	0		NA	0	NA	0	0
AC191254.3_FG001	1	3		1.91112e-07	1	3	0.00779963	1	1	1			4.77323e-13	1	5.01394e-11	1	1.67459e-07	1	0.240024	0	0.000660617	1	0.0813835	0		NA	0	0	NA	0	0	0	0		NA	0	NA	0	0
AC191264.3_FG002	3	0		0.508495	0		0.169752	0		0			0.00733265	1	0.153464	0	0.0260905	1	0.0806035	0	0.433348	0	0.456546	0		NA	0	0	NA	0	0	0	0		NA	0	NA	0	0
AC191264.3_FG003	NA	NA	NA	NA	0		NA	0		0			NA	0	NA	0	NA	0	NA	0	NA	0	NA	0		NA	0	0	NA	0	0	0	0		NA	0	NA	0	0
AC191279.2_FG001	NA	NA	NA	NA	0		NA	0		0			NA	0	NA	0	NA	0	NA	0	NA	0	NA	0		NA	0	0	NA	0	0	0	0		NA	0	NA	0	0
AC191279.2_FG003	NA	NA	NA	NA	0		NA	0		0			NA	0	NA	0	NA	0	NA	0	NA	0	NA	0		NA	0	0	NA	0	0	0	0		NA	0	NA	0	0
AC191283.3_FG004	4	4	4	0.510259	0		0.635435	0		0			0.129735	0	0.559701	0	0.407473	0	0.189725	0	0.329967	0	0.725436	0		NA	0	0	NA	0	0	0	0		NA	0	NA	0	0
AC191297.3_FG004	NA	NA	NA	NA	0		NA	0		0			NA	0	NA	0	NA	0	NA	0	NA	0	NA	0		NA	0	0	NA	0	0	0	0		NA	0	NA	0	0
AC191305.3_FG002	NA	NA	NA	NA	0		NA	0		0			NA	0	NA	0	NA	0	NA	0	NA	0	NA	0		NA	0	0	NA	0	0	0	0		NA	0	NA	0	0
AC191317.3_FG009	NA	NA	NA	NA	0		NA	0		0			NA	0	NA	0	NA	0	NA	0	NA	0	NA	0		NA	0	0	NA	0	0	0	0		NA	0	NA	0	0
AC191328.3_FG002	NA	NA	NA	NA	0		NA	0		0			NA	0	NA	0	NA	0	NA	0	NA	0	NA	0		NA	0	0	NA	0	0	0	0		NA	0	NA	0	0
AC191330.3_FG001	NA	NA	NA	NA	0		NA	0		0			NA	0	NA	0	NA	0	NA	0	NA	0	NA	0		NA	0	0	NA	0	0	0	0		NA	0	NA	0	0
AC191338.3_FG002	4	4	4	0.470666	0		0.624281	0		0			0.0539225	0	0.578384	0	0.21195	0	0.095558	0	0.363275	0	0.552939	0		NA	0	0	NA	0	0	0	0		NA	0	NA	0	0
AC191360.3_FG004	4	4	4	0.341302	0		0.584657	0		0			0.0509316	0	0.115765	0	0.382359	0	0.380299	0	0.185648	0	0.411699	0		0.611227	0	0	0.622656	0	0	0	0		0.0749443	0	0.119828	0	0
AC191360.3_FG015	3	3	3	0.0523629	0		0.168107	0		0			0.00584452	1	0.00900305	1	0.0157967	1	0.297764	0	0.505804	0	0.655064	0		NA	0	0	NA	0	0	0	0		NA	0	NA	0	0
AC191361.4_FG006	NA	NA	NA	NA	0		NA	0		0			NA	0	NA	0	NA	0	NA	0	NA	0	NA	0		NA	0	0	NA	0	0	0	0		NA	0	NA	0	0
AC191362.3_FG002	NA	NA	NA	NA	0		NA	0		0			NA	0	NA	0	NA	0	NA	0	NA	0	NA	0		NA	0	0	NA	0	0	0	0		NA	0	NA	0	0
AC191380.3_FG001	NA	NA	NA	NA	0		NA	0		0			NA	0	NA	0	NA	0	NA	0	NA	0	NA	0		NA	0	0	NA	0	0	0	0		NA	0	NA	0	0
AC191401.3_FG009	NA	NA	NA	NA	0		NA	0		0			NA	0	NA	0	NA	0	NA	0	NA	0	NA	0		NA	0	0	NA	0	0	0	0		NA	0	NA	0	0
AC191401.3_FG013	NA	NA	NA	NA	0		NA	0		0			NA	0	NA	0	NA	0	NA	0	NA	0	NA	0		NA	0	0	NA	0	0	0	0		NA	0	NA	0	0
AC191410.4_FG004	4	4	4	0.623428	0		0.550891	0		0			0.229321	0	0.578159	0	0.266946	0	0.348963	0	0.4235	0	0.624295	0		NA	0	0	NA	0	0	0	0		NA	0	NA	0	0
AC191412.3_FG005	NA	NA	NA	NA	0		NA	0		0			NA	0	NA	0	NA	0	NA	0	NA	0	NA	0		NA	0	0	NA	0	0	0	0		NA	0	NA	0	0
AC191418.3_FG003	NA	NA	NA	NA	0		NA	0		0			NA	0	NA	0	NA	0	NA	0	NA	0	NA	0		NA	0	0	NA	0	0	0	0		NA	0	NA	0	0
AC191421.3_FG001	NA	NA	NA	NA	0		NA	0		0			NA	0	NA	0	NA	0	NA	0	NA	0	NA	0		NA	0	0	NA	0	0	0	0		NA	0	NA	0	0
AC191523.3_FG001	NA	NA	NA	NA	0		NA	0		0			NA	0	NA	0	NA	0	NA	0	NA	0	NA	0		NA	0	0	NA	0	0	0	0		NA	0	NA	0	0
AC191526.3_FG001	4	4	4	0.642405	0		0.571328	0		0			0.252673	0	0.575392	0	0.299122	0	0.379878	0	0.42463	0	0.65895	0		NA	0	0	NA	0	0	0	0		NA	0	NA	0	0
AC191526.3_FG004	NA	NA	NA	NA	0		NA	0		0			NA	0	NA	0	NA	0	NA	0	NA	0	NA	0		NA	0	0	NA	0	0	0	0		NA	0	NA	0	0
AC191534.3_FG003	4	4	4	0.250242	0		0.322365	0		0			0.102346	0	0.12027	0	0.0927693	0	0.26891	0	0.376402	0	0.762051	0		NA	0	0	NA	0	0	0	0		NA	0	NA	0	0
AC191539.4_FG001	4	4	4	0.639998	0		0.683018	0		0			0.124162	0	0.500723	0	0.323745	0	0.282954	0	0.403308	0	0.751832	0		NA	0	0	NA	0	0	0	0		NA	0	NA	0	0
AC191541.4_FG005	4	4	4	0.664777	0		0.558007	0		0			0.201423	0	0.524975	0	0.263329	0	0.367803	0	0.456082	0	0.674645	0		NA	0	0	NA	0	0	0	0		NA	0	NA	0	0
AC191548.3_FG005	NA	NA	NA	NA	0		NA	0		0			NA	0	NA	0	NA	0	NA	0	NA	0	NA	0		NA	0	0	NA	0	0	0	0		NA	0	NA	0	0
AC191551.3_FG003	3	3	3	0.123061	0		0.527344	0		0			0.000387898	1	0.00650672	1	0.0371967	1	0.294612	0	0.0815416	0	0.479173	0		NA	0	0	NA	0	0	0	0		NA	0	NA	0	0
AC191562.3_FG008	NA	NA	NA	NA	0		NA	0		0			NA	0	NA	0	NA	0	NA	0	NA	0	NA	0		NA	0	0	NA	0	0	0	0		NA	0	NA	0	0
AC191564.3_FG003	NA	NA	NA	NA	0		NA	0		0			NA	0	NA	0	NA	0	NA	0	NA	0	NA	0		NA	0	0	NA	0	0	0	0		NA	0	NA	0	0
AC191568.3_FG010	NA	NA	NA	NA	0		NA	0		0			NA	0	NA	0	NA	0	NA	0	NA	0	NA	0		NA	0	0	NA	0	0	0	0		NA	0	NA	0	0
AC191575.2_FG001	1	1	1	0.570816	0		0.668035	0		0			3.53398e-10	1	0.0166743	1	0.00266582	1	0.000100753	1	0.000889614	1	0.676462	0		0.18133	0	0	0.22512	0	0	0	0		0.295915	0	0.234603	0	0
AC191577.3_FG004	NA	NA	NA	NA	0		NA	0		0			NA	0	NA	0	NA	0	NA	0	NA	0	NA	0		NA	0	0	NA	0	0	0	0		NA	0	NA	0	0
AC191578.3_FG003	NA	NA	NA	NA	0		NA	0		0			NA	0	NA	0	NA	0	NA	0	NA	0	NA	0		NA	0	0	NA	0	0	0	0		NA	0	NA	0	0
AC191589.3_FG003	NA	NA	NA	NA	0		NA	0		0			NA	0	NA	0	NA	0	NA	0	NA	0	NA	0		NA	0	0	NA	0	0	0	0		NA	0	NA	0	0
AC191598.3_FG007	1	1	1	0.0345631	1	1	0.576798	0		0			4.50805e-12	1	1.58466e-06	1	0.000707625	1	0.0113005	1	2.04652e-05	1	0.267706	0		0.680537	0	0	0.460348	0	0	0	0		0.0364731	1	0.0277576	1	1
AC191601.1_FG003	3	1		0.52942	0		0.150749	0		0			6.4418e-05	1	0.0195721	1	0.123395	0	0.0272269	1	0.00385336	1	0.458808	0		NA	0	0	NA	0	0	0	0		NA	0	NA	0	0
AC191622.3_FG003	NA	NA	NA	NA	0		NA	0		0			NA	0	NA	0	NA	0	NA	0	NA	0	NA	0		NA	0	0	NA	0	0	0	0		NA	0	NA	0	0
AC191622.3_FG005	NA	NA	NA	NA	0		NA	0		0			NA	0	NA	0	NA	0	NA	0	NA	0	NA	0		NA	0	0	NA	0	0	0	0		NA	0	NA	0	0
AC191650.3_FG003	NA	NA	NA	NA	0		NA	0		0			NA	0	NA	0	NA	0	NA	0	NA	0	NA	0		NA	0	0	NA	0	0	0	0		NA	0	NA	0	0
AC191654.3_FG004	3	2		0.58267	0		0.369393	0		0			0.00131893	1	0.286597	0	0.0269176	1	0.0174121	1	0.218092	0	0.433211	0		NA	0	0	NA	0	0	0	0		NA	0	NA	0	0
AC191676.3_FG011	2	2	2	0.221486	0		0.491377	0		0			1.8062e-05	1	0.000997987	1	0.00494182	1	0.288081	0	0.175679	0	0.633409	0		0.0226624	1	0	0.011236	1	0	1	0		0.246257	0	0.158982	0	0
AC191686.3_FG002	NA	NA	NA	NA	0		NA	0		0			NA	0	NA	0	NA	0	NA	0	NA	0	NA	0		NA	0	0	NA	0	0	0	0		NA	0	NA	0	0
AC191691.3_FG011	NA	NA	NA	NA	0		NA	0		0			NA	0	NA	0	NA	0	NA	0	NA	0	NA	0		NA	0	0	NA	0	0	0	0		NA	0	NA	0	0
AC191692.3_FG001	NA	NA	NA	NA	0		NA	0		0			NA	0	NA	0	NA	0	NA	0	NA	0	NA	0		NA	0	0	NA	0	0	0	0		NA	0	NA	0	0
AC191704.3_FG007	NA	NA	NA	NA	0		NA	0		0			NA	0	NA	0	NA	0	NA	0	NA	0	NA	0		NA	0	0	NA	0	0	0	0		NA	0	NA	0	0
AC191708.3_FG001	NA	NA	NA	NA	0		NA	0		0			NA	0	NA	0	NA	0	NA	0	NA	0	NA	0		NA	0	0	NA	0	0	0	0		NA	0	NA	0	0
AC191708.3_FG002	NA	NA	NA	NA	0		NA	0		0			NA	0	NA	0	NA	0	NA	0	NA	0	NA	0		NA	0	0	NA	0	0	0	0		NA	0	NA	0	0
AC191731.3_FG001	NA	NA	NA	NA	0		NA	0		0			NA	0	NA	0	NA	0	NA	0	NA	0	NA	0		NA	0	0	NA	0	0	0	0		NA	0	NA	0	0
AC191735.3_FG009	NA	NA	NA	NA	0		NA	0		0			NA	0	NA	0	NA	0	NA	0	NA	0	NA	0		NA	0	0	NA	0	0	0	0		NA	0	NA	0	0
AC191748.3_FG001	4	4	4	0.549206	0		0.668373	0		0			0.084775	0	0.308972	0	0.344822	0	0.372168	0	0.298664	0	0.664964	0		NA	0	0	NA	0	0	0	0		NA	0	NA	0	0
AC191771.3_FG008	3	0		0.62557	0		0.253866	0		0			0.0019164	1	0.14823	0	0.00772193	1	0.126797	0	0.47786	0	0.502277	0		0.383188	0	0	0.727042	0	0	0	0		0.212521	0	0.206655	0	0
AC191778.3_FG001	4	4	4	0.515582	0		0.609772	0		0			0.140585	0	0.55954	0	0.256461	0	0.204755	0	0.500988	0	0.58168	0		NA	0	0	NA	0	0	0	0		NA	0	NA	0	0
AC191782.3_FG001	NA	NA	NA	NA	0		NA	0		0			NA	0	NA	0	NA	0	NA	0	NA	0	NA	0		NA	0	0	NA	0	0	0	0		NA	0	NA	0	0
AC191790.3_FG005	NA	NA	NA	NA	0		NA	0		0			NA	0	NA	0	NA	0	NA	0	NA	0	NA	0		NA	0	0	NA	0	0	0	0		NA	0	NA	0	0
AC191804.4_FG002	4	4	4	0.578438	0		0.435096	0		0			0.179922	0	0.406171	0	0.161206	0	0.422286	0	0.359841	0	0.665036	0		NA	0	0	NA	0	0	0	0		NA	0	NA	0	0
AC191927.2_FG002	NA	NA	NA	NA	0		NA	0		0			NA	0	NA	0	NA	0	NA	0	NA	0	NA	0		NA	0	0	NA	0	0	0	0		NA	0	NA	0	0
AC191961.3_FG009	NA	NA	NA	NA	0		NA	0		0			NA	0	NA	0	NA	0	NA	0	NA	0	NA	0		NA	0	0	NA	0	0	0	0		NA	0	NA	0	0
AC192175.3_FG001	NA	NA	NA	NA	0		NA	0		0			NA	0	NA	0	NA	0	NA	0	NA	0	NA	0		NA	0	0	NA	0	0	0	0		NA	0	NA	0	0
AC192177.3_FG008	4	4	4	0.578	0		0.543202	0		0			0.105843	0	0.3584	0	0.430832	0	0.369933	0	0.206951	0	0.572655	0		NA	0	0	NA	0	0	0	0		NA	0	NA	0	0
AC192204.3_FG005	NA	NA	NA	NA	0		NA	0		0			NA	0	NA	0	NA	0	NA	0	NA	0	NA	0		NA	0	0	NA	0	0	0	0		NA	0	NA	0	0
AC192240.3_FG005	NA	NA	NA	NA	0		NA	0		0			NA	0	NA	0	NA	0	NA	0	NA	0	NA	0		NA	0	0	NA	0	0	0	0		NA	0	NA	0	0
AC192244.3_FG001	4	0		0.190773	0		0.66999	0		0			0.0967057	0	0.328041	0	0.346797	0	0.0355135	1	0.336053	0	0.446309	0		0.450456	0	0	0.345073	0	0	0	0		0.00172847	1	0.0103488	1	1
AC192244.3_FG007	6	6	6	0.000266869	1	6	2.41774e-11	1	6	1	6		0.159453	0	0.00355783	1	6.58527e-08	1	0.000130403	1	7.17823e-10	1	0.186052	0		0.0118723	1	1	0.289308	0	0	0	0		0.404467	0	0.00755641	1	0
AC192330.1_FG004	NA	NA	NA	NA	0		NA	0		0			NA	0	NA	0	NA	0	NA	0	NA	0	NA	0		NA	0	0	NA	0	0	0	0		NA	0	NA	0	0
AC192356.3_FG003	1	3		0.0215483	1	3	0.0723534	0		0			8.64935e-05	1	0.00197788	1	0.00285712	1	0.063902	0	0.0095267	1	0.539412	0		NA	0	0	NA	0	0	0	0		NA	0	NA	0	0
AC192362.3_FG002	3	2		0.42713	0		0.312455	0		0			1.33646e-08	1	0.092422	0	0.000219547	1	0.000241143	1	0.080095	0	0.262145	0		0.163112	0	0	0.405228	0	0	0	0		0.346149	0	0.0723819	0	0
AC192362.3_FG003	1	2		0.316943	0		0.587104	0		0			1.69983e-08	1	0.148516	0	0.00263205	1	0.000133853	1	0.023313	1	0.394115	0		0.41511	0	0	0.334986	0	0	0	0		0.00162242	1	0.000430931	1	1
AC192367.2_FG002	0	0	0	0.54044	0		0.442383	0		0			0.0425313	1	0.504259	0	0.0890078	0	0.130073	0	0.514953	0	0.459795	0		NA	0	0	NA	0	0	0	0		NA	0	NA	0	0
AC192368.3_FG009	NA	NA	NA	NA	0		NA	0		0			NA	0	NA	0	NA	0	NA	0	NA	0	NA	0		NA	0	0	NA	0	0	0	0		NA	0	NA	0	0
AC192372.3_FG003	4	4	4	0.438037	0		0.527772	0		0			0.283378	0	0.368467	0	0.292119	0	0.264445	0	0.373588	0	0.76052	0		NA	0	0	NA	0	0	0	0		NA	0	NA	0	0
AC192381.3_FG004	NA	NA	NA	NA	0		NA	0		0			NA	0	NA	0	NA	0	NA	0	NA	0	NA	0		NA	0	0	NA	0	0	0	0		NA	0	NA	0	0
AC192405.3_FG001	NA	NA	NA	NA	0		NA	0		0			NA	0	NA	0	NA	0	NA	0	NA	0	NA	0		NA	0	0	NA	0	0	0	0		NA	0	NA	0	0
AC192451.3_FG001	2	1		0.299633	0		0.000204003	1	2	0			5.47653e-31	1	9.20546e-11	1	0.0590122	0	4.85766e-06	1	9.93454e-22	1	0.00016171	1		0.384027	0	0	0.227314	0	0	0	0		0.0666178	0	0.21931	0	0
AC192608.3_FG004	4	4	4	0.554837	0		0.416411	0		0			0.104579	0	0.329439	0	0.339448	0	0.392229	0	0.13513	0	0.447897	0		NA	0	0	NA	0	0	0	0		NA	0	NA	0	0
AC193318.3_FG006	NA	NA	NA	NA	0		NA	0		0			NA	0	NA	0	NA	0	NA	0	NA	0	NA	0		NA	0	0	NA	0	0	0	0		NA	0	NA	0	0
AC193319.3_FG004	NA	NA	NA	NA	0		NA	0		0			NA	0	NA	0	NA	0	NA	0	NA	0	NA	0		NA	0	0	NA	0	0	0	0		NA	0	NA	0	0
AC193324.3_FG002	1	1	1	0.487465	0		0.141269	0		0			8.20065e-27	1	2.05613e-07	1	2.23515e-10	1	7.81202e-09	1	2.48282e-06	1	0.522669	0		NA	0	0	NA	0	0	0	0		NA	0	NA	0	0
AC193335.3_FG001	NA	NA	NA	NA	0		NA	0		0			NA	0	NA	0	NA	0	NA	0	NA	0	NA	0		NA	0	0	NA	0	0	0	0		NA	0	NA	0	0
AC193353.3_FG002	NA	NA	NA	NA	0		NA	0		0			NA	0	NA	0	NA	0	NA	0	NA	0	NA	0		NA	0	0	NA	0	0	0	0		NA	0	NA	0	0
AC193379.3_FG001	3	2		0.533361	0		0.102286	0		0			0.000102438	1	0.208119	0	0.000417589	1	0.0164031	1	0.497775	0	0.180344	0		NA	0	0	NA	0	0	0	0		NA	0	NA	0	0
AC193402.3_FG004	0	0	0	0.60095	0		0.680242	0		0			0.00950713	1	0.116074	0	0.11801	0	0.237122	0	0.213395	0	0.714917	0		NA	0	0	NA	0	0	0	0		NA	0	NA	0	0
AC193423.3_FG003	NA	NA	NA	NA	0		NA	0		0			NA	0	NA	0	NA	0	NA	0	NA	0	NA	0		NA	0	0	NA	0	0	0	0		NA	0	NA	0	0
AC193430.3_FG008	NA	NA	NA	NA	0		NA	0		0			NA	0	NA	0	NA	0	NA	0	NA	0	NA	0		NA	0	0	NA	0	0	0	0		NA	0	NA	0	0
AC193440.3_FG009	NA	NA	NA	NA	0		NA	0		0			NA	0	NA	0	NA	0	NA	0	NA	0	NA	0		NA	0	0	NA	0	0	0	0		NA	0	NA	0	0
AC193464.3_FG001	NA	NA	NA	NA	0		NA	0		0			NA	0	NA	0	NA	0	NA	0	NA	0	NA	0		NA	0	0	NA	0	0	0	0		NA	0	NA	0	0
AC193466.3_FG001	NA	NA	NA	NA	0		NA	0		0			NA	0	NA	0	NA	0	NA	0	NA	0	NA	0		NA	0	0	NA	0	0	0	0		NA	0	NA	0	0
AC193479.2_FG002	NA	NA	NA	NA	0		NA	0		0			NA	0	NA	0	NA	0	NA	0	NA	0	NA	0		NA	0	0	NA	0	0	0	0		NA	0	NA	0	0
AC193499.3_FG004	3	1		0.00877578	1	1	0.0010767	1	3	1			2.57076e-09	1	7.72525e-06	1	7.94441e-07	1	0.013276	1	0.0855804	0	0.620759	0		NA	0	0	NA	0	0	0	0		NA	0	NA	0	0
AC193499.3_FG007	NA	NA	NA	NA	0		NA	0		0			NA	0	NA	0	NA	0	NA	0	NA	0	NA	0		NA	0	0	NA	0	0	0	0		NA	0	NA	0	0
AC193500.3_FG003	2	3		0.641147	0		0.582409	0		0			1.16088e-05	1	0.0556398	0	0.00908947	1	0.0286137	1	0.112354	0	0.668917	0		0.233463	0	0	0.420778	0	0	0	0		0.404823	0	0.186959	0	0
AC193502.3_FG004	0	0	0	0.660904	0		0.669586	0		0			0.00730457	1	0.28177	0	0.210159	0	0.0835525	0	0.0955015	0	0.765718	0		NA	0	0	NA	0	0	0	0		NA	0	NA	0	0
AC193503.3_FG004	NA	NA	NA	NA	0		NA	0		0			NA	0	NA	0	NA	0	NA	0	NA	0	NA	0		NA	0	0	NA	0	0	0	0		NA	0	NA	0	0
AC193576.3_FG003	NA	NA	NA	NA	0		NA	0		0			NA	0	NA	0	NA	0	NA	0	NA	0	NA	0		NA	0	0	NA	0	0	0	0		NA	0	NA	0	0
AC193591.3_FG001	1	3		0.0902968	0		0.235453	0		0			1.38526e-14	1	0.0756304	0	0.0157366	1	4.18422e-08	1	8.27522e-07	1	0.681144	0		0.667792	0	0	0.325779	0	0	0	0		0.0100496	1	1.27305e-05	1	1
AC193592.3_FG001	4	4	4	0.371358	0		0.623556	0		0			0.182004	0	0.241464	0	0.305292	0	0.285955	0	0.509499	0	0.647505	0		NA	0	0	NA	0	0	0	0		NA	0	NA	0	0
AC193598.3_FG002	2	0		0.611479	0		0.383986	0		0			0.00123709	1	0.111004	0	0.0132809	1	0.136539	0	0.391711	0	0.611555	0		NA	0	0	NA	0	0	0	0		NA	0	NA	0	0
AC193606.2_FG001	NA	NA	NA	NA	0		NA	0		0			NA	0	NA	0	NA	0	NA	0	NA	0	NA	0		NA	0	0	NA	0	0	0	0		NA	0	NA	0	0
AC193606.2_FG005	NA	NA	NA	NA	0		NA	0		0			NA	0	NA	0	NA	0	NA	0	NA	0	NA	0		NA	0	0	NA	0	0	0	0		NA	0	NA	0	0
AC193625.3_FG008	NA	NA	NA	NA	0		NA	0		0			NA	0	NA	0	NA	0	NA	0	NA	0	NA	0		NA	0	0	NA	0	0	0	0		NA	0	NA	0	0
AC193625.3_FG010	4	4	4	0.516228	0		0.676271	0		0			0.295964	0	0.444101	0	0.430385	0	0.309303	0	0.490082	0	0.650372	0		NA	0	0	NA	0	0	0	0		NA	0	NA	0	0
AC193630.3_FG003	4	4	4	0.452465	0		0.607763	0		0			0.0740765	0	0.557512	0	0.389391	0	0.111768	0	0.238243	0	0.711999	0		NA	0	0	NA	0	0	0	0		NA	0	NA	0	0
AC193630.3_FG004	0	0	0	0.549059	0		0.544743	0		0			0.0157174	1	0.437063	0	0.349345	0	0.0835525	0	0.0916285	0	0.762437	0		NA	0	0	NA	0	0	0	0		NA	0	NA	0	0
AC193632.2_FG002	2	2	2	0.218474	0		0.0339905	1	2	0			0.00142874	1	0.56722	0	0.24012	0	0.00429343	1	0.000259585	1	0.571784	0		NA	0	0	NA	0	0	0	0		NA	0	NA	0	0
AC193645.3_FG006	NA	NA	NA	NA	0		NA	0		0			NA	0	NA	0	NA	0	NA	0	NA	0	NA	0		NA	0	0	NA	0	0	0	0		NA	0	NA	0	0
AC193646.3_FG002	4	4	4	0.646732	0		0.541398	0		0			0.242661	0	0.526015	0	0.26779	0	0.416547	0	0.407085	0	0.680361	0		NA	0	0	NA	0	0	0	0		NA	0	NA	0	0
AC193658.3_FG001	NA	NA	NA	NA	0		NA	0		0			NA	0	NA	0	NA	0	NA	0	NA	0	NA	0		NA	0	0	NA	0	0	0	0		NA	0	NA	0	0
AC193668.3_FG009	0	0	0	0.437297	0		0.559556	0		0			0.0324805	1	0.57881	0	0.385897	0	0.0608715	0	0.115672	0	0.72676	0		NA	0	0	NA	0	0	0	0		NA	0	NA	0	0
AC193744.3_FG009	NA	NA	NA	NA	0		NA	0		0			NA	0	NA	0	NA	0	NA	0	NA	0	NA	0		NA	0	0	NA	0	0	0	0		NA	0	NA	0	0
AC193745.3_FG002	4	4	4	0.523661	0		0.515842	0		0			0.0648233	0	0.550647	0	0.449453	0	0.137422	0	0.152783	0	0.762767	0		NA	0	0	NA	0	0	0	0		NA	0	NA	0	0
AC193745.3_FG003	0	0	0	0.549565	0		0.554925	0		0			0.041502	1	0.254828	0	0.150776	0	0.304502	0	0.407018	0	0.765839	0		NA	0	0	NA	0	0	0	0		NA	0	NA	0	0
AC193754.3_FG005	3	0		0.550112	0		0.0915741	0		0			0.0418248	1	0.506857	0	0.0222583	1	0.112831	0	0.263146	0	0.218485	0		NA	0	0	NA	0	0	0	0		NA	0	NA	0	0
AC193754.3_FG008	0	4		0.143497	0		0.146822	0		0			0.104652	0	0.0507338	0	0.0303699	1	0.168597	0	0.220525	0	0.781015	0		NA	0	0	NA	0	0	0	0		NA	0	NA	0	0
AC193756.3_FG001	NA	NA	NA	NA	0		NA	0		0			NA	0	NA	0	NA	0	NA	0	NA	0	NA	0		NA	0	0	NA	0	0	0	0		NA	0	NA	0	0
AC193767.3_FG003	NA	NA	NA	NA	0		NA	0		0			NA	0	NA	0	NA	0	NA	0	NA	0	NA	0		NA	0	0	NA	0	0	0	0		NA	0	NA	0	0
AC193786.3_FG005	4	4	4	0.245696	0		0.321399	0		0			0.115575	0	0.0954456	0	0.0769923	0	0.202539	0	0.313265	0	0.747863	0		NA	0	0	NA	0	0	0	0		NA	0	NA	0	0
AC193787.3_FG008	0	0	0	0.5651	0		0.657801	0		0			0.0389328	1	0.487743	0	0.303594	0	0.119129	0	0.199776	0	0.743707	0		NA	0	0	NA	0	0	0	0		NA	0	NA	0	0
AC194005.3_FG004	1	1	1	0.000723953	1	1	0.0415615	1	1	1	1		1.65585e-15	1	6.15169e-05	1	1.91187e-08	1	2.40289e-09	1	2.90898e-07	1	0.380283	0		0.5372	0	0	0.631017	0	0	0	0		0.157339	0	0.0664925	0	0
AC194008.3_FG007	NA	NA	NA	NA	0		NA	0		0			NA	0	NA	0	NA	0	NA	0	NA	0	NA	0		NA	0	0	NA	0	0	0	0		NA	0	NA	0	0
AC194016.3_FG001	NA	NA	NA	NA	0		NA	0		0			NA	0	NA	0	NA	0	NA	0	NA	0	NA	0		NA	0	0	NA	0	0	0	0		NA	0	NA	0	0
AC194022.3_FG013	4	4	4	0.488395	0		0.63618	0		0			0.190628	0	0.502323	0	0.319164	0	0.214036	0	0.509081	0	0.585811	0		0.239937	0	0	0.502221	0	0	0	0		0.0152829	1	0.209838	0	0
AC194022.3_FG014	NA	NA	NA	NA	0		NA	0		0			NA	0	NA	0	NA	0	NA	0	NA	0	NA	0		NA	0	0	NA	0	0	0	0		NA	0	NA	0	0
AC194031.3_FG002	NA	NA	NA	NA	0		NA	0		0			NA	0	NA	0	NA	0	NA	0	NA	0	NA	0		NA	0	0	NA	0	0	0	0		NA	0	NA	0	0
AC194032.3_FG010	NA	NA	NA	NA	0		NA	0		0			NA	0	NA	0	NA	0	NA	0	NA	0	NA	0		NA	0	0	NA	0	0	0	0		NA	0	NA	0	0
AC194039.4_FG009	NA	NA	NA	NA	0		NA	0		0			NA	0	NA	0	NA	0	NA	0	NA	0	NA	0		NA	0	0	NA	0	0	0	0		NA	0	NA	0	0
AC194045.3_FG001	NA	NA	NA	NA	0		NA	0		0			NA	0	NA	0	NA	0	NA	0	NA	0	NA	0		NA	0	0	NA	0	0	0	0		NA	0	NA	0	0
AC194047.3_FG006	3	3	3	0.208803	0		0.153528	0		0			0.00116921	1	0.0301579	1	0.0130253	1	0.0569472	0	0.137699	0	0.710996	0		NA	0	0	NA	0	0	0	0		NA	0	NA	0	0
AC194056.3_FG008	8	4		0.504794	0		0.0441631	1	8	0			0.289937	0	0.439207	0	0.0285612	1	0.28851	0	0.032008	1	0.355446	0		0.632282	0	0	0.531146	0	0	0	0		0.369021	0	0.0664925	0	0
AC194072.3_FG005	1	1	1	0.142075	0		0.143794	0		0			1.92428e-07	1	0.000666632	1	0.00038202	1	0.00820138	1	0.011947	1	0.77706	0		0.462905	0	0	0.593517	0	0	0	0		0.023681	1	0.00819208	1	1
AC194097.3_FG008	0	0	0	0.400817	0		0.409611	0		0			0.0107914	1	0.104047	0	0.0597554	0	0.288666	0	0.377091	0	0.769267	0		NA	0	0	NA	0	0	0	0		NA	0	NA	0	0
AC194097.3_FG009	0	0	0	0.317983	0		0.436651	0		0			0.00788891	1	0.0827298	0	0.0706554	0	0.209006	0	0.194076	0	0.725436	0		NA	0	0	NA	0	0	0	0		NA	0	NA	0	0
AC194101.3_FG001	NA	NA	NA	NA	0		NA	0		0			NA	0	NA	0	NA	0	NA	0	NA	0	NA	0		NA	0	0	NA	0	0	0	0		NA	0	NA	0	0
AC194103.3_FG006	NA	NA	NA	NA	0		NA	0		0			NA	0	NA	0	NA	0	NA	0	NA	0	NA	0		NA	0	0	NA	0	0	0	0		NA	0	NA	0	0
AC194104.3_FG007	NA	NA	NA	NA	0		NA	0		0			NA	0	NA	0	NA	0	NA	0	NA	0	NA	0		NA	0	0	NA	0	0	0	0		NA	0	NA	0	0
AC194104.3_FG010	NA	NA	NA	NA	0		NA	0		0			NA	0	NA	0	NA	0	NA	0	NA	0	NA	0		NA	0	0	NA	0	0	0	0		NA	0	NA	0	0
AC194112.3_FG001	NA	NA	NA	NA	0		NA	0		0			NA	0	NA	0	NA	0	NA	0	NA	0	NA	0		NA	0	0	NA	0	0	0	0		NA	0	NA	0	0
AC194133.3_FG004	NA	NA	NA	NA	0		NA	0		0			NA	0	NA	0	NA	0	NA	0	NA	0	NA	0		NA	0	0	NA	0	0	0	0		NA	0	NA	0	0
AC194136.3_FG001	NA	NA	NA	NA	0		NA	0		0			NA	0	NA	0	NA	0	NA	0	NA	0	NA	0		NA	0	0	NA	0	0	0	0		NA	0	NA	0	0
AC194157.3_FG001	NA	NA	NA	NA	0		NA	0		0			NA	0	NA	0	NA	0	NA	0	NA	0	NA	0		NA	0	0	NA	0	0	0	0		NA	0	NA	0	0
AC194158.3_FG005	3	3	3	0.0199079	1	3	0.102533	0		0			0.0309338	1	0.146113	0	0.217535	0	0.0010925	1	0.0101097	1	0.648798	0		0.622742	0	0	0.654764	0	0	0	0		0.185875	0	0.158069	0	0
AC194163.3_FG001	NA	NA	NA	NA	0		NA	0		0			NA	0	NA	0	NA	0	NA	0	NA	0	NA	0		NA	0	0	NA	0	0	0	0		NA	0	NA	0	0
AC194163.3_FG002	NA	NA	NA	NA	0		NA	0		0			NA	0	NA	0	NA	0	NA	0	NA	0	NA	0		NA	0	0	NA	0	0	0	0		NA	0	NA	0	0
AC194163.3_FG003	NA	NA	NA	NA	0		NA	0		0			NA	0	NA	0	NA	0	NA	0	NA	0	NA	0		NA	0	0	NA	0	0	0	0		NA	0	NA	0	0
AC194172.3_FG008	NA	NA	NA	NA	0		NA	0		0			NA	0	NA	0	NA	0	NA	0	NA	0	NA	0		NA	0	0	NA	0	0	0	0		NA	0	NA	0	0
AC194174.3_FG003	NA	NA	NA	NA	0		NA	0		0			NA	0	NA	0	NA	0	NA	0	NA	0	NA	0		NA	0	0	NA	0	0	0	0		NA	0	NA	0	0
AC194176.3_FG002	0	0	0	0.600572	0		0.547646	0		0			0.017271	1	0.304517	0	0.274634	0	0.150743	0	0.139078	0	0.725248	0		NA	0	0	NA	0	0	0	0		NA	0	NA	0	0
AC194180.3_FG004	NA	NA	NA	NA	0		NA	0		0			NA	0	NA	0	NA	0	NA	0	NA	0	NA	0		NA	0	0	NA	0	0	0	0		NA	0	NA	0	0
AC194203.3_FG003	2	3		0.48606	0		0.600762	0		0			1.6215e-05	1	0.155098	0	0.0125617	1	0.0089164	1	0.10613	0	0.545698	0		NA	0	0	NA	0	0	0	0		NA	0	NA	0	0
AC194206.3_FG005	0	2		0.394035	0		0.487258	0		0			0.0142409	1	0.579992	0	0.0931266	0	0.0289183	1	0.299446	0	0.375546	0		NA	0	0	NA	0	0	0	0		NA	0	NA	0	0
AC194214.3_FG002	4	4	4	0.615129	0		0.672331	0		0			0.275828	0	0.547058	0	0.411902	0	0.368541	0	0.502259	0	0.720304	0		NA	0	0	NA	0	0	0	0		NA	0	NA	0	0
AC194219.3_FG002	NA	NA	NA	NA	0		NA	0		0			NA	0	NA	0	NA	0	NA	0	NA	0	NA	0		NA	0	0	NA	0	0	0	0		NA	0	NA	0	0
AC194259.3_FG001	NA	NA	NA	NA	0		NA	0		0			NA	0	NA	0	NA	0	NA	0	NA	0	NA	0		NA	0	0	NA	0	0	0	0		NA	0	NA	0	0
AC194264.3_FG006	2	2	2	0.460159	0		0.500862	0		0			2.83342e-05	1	0.225614	0	0.147282	0	0.00620783	1	0.00881361	1	0.779622	0		NA	0	0	NA	0	0	0	0		NA	0	NA	0	0
AC194272.3_FG003	6	6	6	0.0281464	1	6	0.0147741	1	6	1	6		0.206317	0	0.018416	1	0.00663177	1	0.0300051	1	0.0280616	1	0.748851	0		0.636763	0	0	0.673646	0	0	0	0		0.00809827	1	0.00181162	1	1
AC194273.3_FG006	NA	NA	NA	NA	0		NA	0		0			NA	0	NA	0	NA	0	NA	0	NA	0	NA	0		NA	0	0	NA	0	0	0	0		NA	0	NA	0	0
AC194273.3_FG007	NA	NA	NA	NA	0		NA	0		0			NA	0	NA	0	NA	0	NA	0	NA	0	NA	0		NA	0	0	NA	0	0	0	0		NA	0	NA	0	0
AC194298.3_FG005	4	4	4	0.357691	0		0.65929	0		0			0.113184	0	0.169032	0	0.372148	0	0.319155	0	0.33926	0	0.506474	0		0.25448	0	0	0.401657	0	0	0	0		0.00247619	1	0.03245	1	1
AC194321.3_FG009	NA	NA	NA	NA	0		NA	0		0			NA	0	NA	0	NA	0	NA	0	NA	0	NA	0		NA	0	0	NA	0	0	0	0		NA	0	NA	0	0
AC194325.3_FG006	NA	NA	NA	NA	0		NA	0		0			NA	0	NA	0	NA	0	NA	0	NA	0	NA	0		NA	0	0	NA	0	0	0	0		NA	0	NA	0	0
AC194335.3_FG001	NA	NA	NA	NA	0		NA	0		0			NA	0	NA	0	NA	0	NA	0	NA	0	NA	0		NA	0	0	NA	0	0	0	0		NA	0	NA	0	0
AC194338.3_FG008	NA	NA	NA	NA	0		NA	0		0			NA	0	NA	0	NA	0	NA	0	NA	0	NA	0		NA	0	0	NA	0	0	0	0		NA	0	NA	0	0
AC194341.4_FG001	NA	NA	NA	NA	0		NA	0		0			NA	0	NA	0	NA	0	NA	0	NA	0	NA	0		NA	0	0	NA	0	0	0	0		NA	0	NA	0	0
AC194341.4_FG002	0	4		0.611548	0		0.218744	0		0			0.115886	0	0.388939	0	0.0498667	1	0.367407	0	0.26214	0	0.484363	0		NA	0	0	NA	0	0	0	0		NA	0	NA	0	0
AC194341.4_FG003	4	4	4	0.204884	0		0.105764	0		0			0.278375	0	0.17861	0	0.0628204	0	0.122385	0	0.0932898	0	0.709239	0		NA	0	0	NA	0	0	0	0		NA	0	NA	0	0
AC194341.4_FG004	3	2		0.25145	0		0.324275	0		0			0.00154044	1	0.0101192	1	0.354926	0	0.402048	0	0.0147087	1	0.15039	0		0.47652	0	0	0.404463	0	0	0	0		0.0321344	1	0.00890483	1	1
AC194350.3_FG001	0	3		0.122475	0		0.361946	0		0			0.0123735	1	0.0416836	1	0.0652956	0	0.396822	0	0.302769	0	0.562097	0		NA	0	0	NA	0	0	0	0		NA	0	NA	0	0
AC194355.3_FG002	0	0	0	0.351523	0		0.462346	0		0			0.0370967	1	0.126122	0	0.438211	0	0.427272	0	0.0878089	0	0.332329	0		NA	0	0	NA	0	0	0	0		NA	0	NA	0	0
AC194356.3_FG002	4	4	4	0.335304	0		0.676344	0		0			0.215865	0	0.242976	0	0.426599	0	0.2388	0	0.435413	0	0.516034	0		NA	0	0	NA	0	0	0	0		NA	0	NA	0	0
AC194357.3_FG003	NA	NA	NA	NA	0		NA	0		0			NA	0	NA	0	NA	0	NA	0	NA	0	NA	0		NA	0	0	NA	0	0	0	0		NA	0	NA	0	0
AC194362.3_FG003	4	4	4	0.535407	0		0.538313	0		0			0.19701	0	0.526678	0	0.37054	0	0.248379	0	0.284323	0	0.765718	0		NA	0	0	NA	0	0	0	0		NA	0	NA	0	0
AC194380.3_FG008	NA	NA	NA	NA	0		NA	0		0			NA	0	NA	0	NA	0	NA	0	NA	0	NA	0		NA	0	0	NA	0	0	0	0		NA	0	NA	0	0
AC194389.3_FG001	2	0		0.573593	0		0.0590745	0		0			0.0186124	1	0.408108	0	0.184585	0	0.117379	0	0.00303897	1	0.329303	0		0.704142	0	0	0.730527	0	0	0	0		0.0362327	1	0.128144	0	0
AC194402.2_FG003	NA	NA	NA	NA	0		NA	0		0			NA	0	NA	0	NA	0	NA	0	NA	0	NA	0		NA	0	0	NA	0	0	0	0		NA	0	NA	0	0
AC194402.2_FG004	4	4	4	0.65696	0		0.547646	0		0			0.18815	0	0.501721	0	0.391444	0	0.373812	0	0.292005	0	0.657686	0		0.69455	0	0	0.715322	0	0	0	0		0.363495	0	0.238279	0	0
AC194405.3_FG009	NA	NA	NA	NA	0		NA	0		0			NA	0	NA	0	NA	0	NA	0	NA	0	NA	0		NA	0	0	NA	0	0	0	0		NA	0	NA	0	0
AC194405.3_FG021	4	4	4	0.563549	0		0.614983	0		0			0.136981	0	0.567797	0	0.259173	0	0.237154	0	0.492587	0	0.627943	0		NA	0	0	NA	0	0	0	0		NA	0	NA	0	0
AC194410.3_FG002	NA	NA	NA	NA	0		NA	0		0			NA	0	NA	0	NA	0	NA	0	NA	0	NA	0		NA	0	0	NA	0	0	0	0		NA	0	NA	0	0
AC194425.3_FG005	2	3		0.153218	0		0.328972	0		0			0.00754111	1	0.477138	0	0.0208912	1	0.00560082	1	0.506008	0	0.0888517	0		0.652988	0	0	0.030703	1	0	0	0		0.03253	1	0.0771045	0	0
AC194428.3_FG006	0	0	0	0.461101	0		0.696861	0		0			0.0417344	1	0.177947	0	0.256918	0	0.386199	0	0.280715	0	0.633605	0		NA	0	0	NA	0	0	0	0		NA	0	NA	0	0
AC194428.3_FG007	4	4	4	0.413415	0		0.656439	0		0			0.129416	0	0.477642	0	0.390579	0	0.127626	0	0.345351	0	0.636273	0		NA	0	0	NA	0	0	0	0		NA	0	NA	0	0
AC194438.3_FG005	NA	NA	NA	NA	0		NA	0		0			NA	0	NA	0	NA	0	NA	0	NA	0	NA	0		NA	0	0	NA	0	0	0	0		NA	0	NA	0	0
AC194439.3_FG002	3	0		0.624875	0		0.249172	0		0			0.00709471	1	0.219504	0	0.0261825	1	0.100937	0	0.461567	0	0.475206	0		NA	0	0	NA	0	0	0	0		NA	0	NA	0	0
AC194452.3_FG001	NA	NA	NA	NA	0		NA	0		0			NA	0	NA	0	NA	0	NA	0	NA	0	NA	0		NA	0	0	NA	0	0	0	0		NA	0	NA	0	0
AC194457.3_FG001	4	4	4	0.579859	0		0.471477	0		0			0.29744	0	0.503583	0	0.258687	0	0.35363	0	0.307505	0	0.693566	0		NA	0	0	NA	0	0	0	0		NA	0	NA	0	0
AC194467.3_FG006	4	4	4	0.636938	0		0.68144	0		0			0.268438	0	0.532572	0	0.415684	0	0.421231	0	0.515163	0	0.773091	0		NA	0	0	NA	0	0	0	0		NA	0	NA	0	0
AC194472.3_FG001	NA	NA	NA	NA	0		NA	0		0			NA	0	NA	0	NA	0	NA	0	NA	0	NA	0		NA	0	0	NA	0	0	0	0		NA	0	NA	0	0
AC194478.3_FG005	NA	NA	NA	NA	0		NA	0		0			NA	0	NA	0	NA	0	NA	0	NA	0	NA	0		NA	0	0	NA	0	0	0	0		NA	0	NA	0	0
AC194480.3_FG001	NA	NA	NA	NA	0		NA	0		0			NA	0	NA	0	NA	0	NA	0	NA	0	NA	0		NA	0	0	NA	0	0	0	0		NA	0	NA	0	0
AC194480.3_FG003	NA	NA	NA	NA	0		NA	0		0			NA	0	NA	0	NA	0	NA	0	NA	0	NA	0		NA	0	0	NA	0	0	0	0		NA	0	NA	0	0
AC194481.3_FG002	NA	NA	NA	NA	0		NA	0		0			NA	0	NA	0	NA	0	NA	0	NA	0	NA	0		NA	0	0	NA	0	0	0	0		NA	0	NA	0	0
AC194485.3_FG002	NA	NA	NA	NA	0		NA	0		0			NA	0	NA	0	NA	0	NA	0	NA	0	NA	0		NA	0	0	NA	0	0	0	0		NA	0	NA	0	0
AC194591.2_FG004	NA	NA	NA	NA	0		NA	0		0			NA	0	NA	0	NA	0	NA	0	NA	0	NA	0		NA	0	0	NA	0	0	0	0		NA	0	NA	0	0
AC194591.2_FG005	1	1	1	0.134424	0		0.687035	0		0			3.47764e-07	1	0.000959701	1	0.0273142	1	0.00418554	1	8.69871e-06	1	0.242566	0		0.65123	0	0	0.465285	0	0	0	0		0.0147026	1	0.119828	0	0
AC194592.2_FG001	0	3		0.105043	0		0.504971	0		0			0.012191	1	0.0295568	1	0.0954057	0	0.346302	0	0.264366	0	0.462447	0		NA	0	0	NA	0	0	0	0		NA	0	NA	0	0
AC194597.2_FG001	NA	NA	NA	NA	0		NA	0		0			NA	0	NA	0	NA	0	NA	0	NA	0	NA	0		NA	0	0	NA	0	0	0	0		NA	0	NA	0	0
AC194609.2_FG003	4	4	4	0.530853	0		0.53895	0		0			0.267081	0	0.431266	0	0.329367	0	0.337129	0	0.340549	0	0.526048	0		NA	0	0	NA	0	0	0	0		NA	0	NA	0	0
AC194613.2_FG002	NA	NA	NA	NA	0		NA	0		0			NA	0	NA	0	NA	0	NA	0	NA	0	NA	0		NA	0	0	NA	0	0	0	0		NA	0	NA	0	0
AC194633.3_FG014	NA	NA	NA	NA	0		NA	0		0			NA	0	NA	0	NA	0	NA	0	NA	0	NA	0		NA	0	0	NA	0	0	0	0		NA	0	NA	0	0
AC194666.2_FG010	4	4	4	0.436955	0		0.442097	0		0			0.202142	0	0.436921	0	0.293438	0	0.182272	0	0.216071	0	0.766745	0		NA	0	0	NA	0	0	0	0		NA	0	NA	0	0
AC194670.2_FG001	NA	NA	NA	NA	0		NA	0		0			NA	0	NA	0	NA	0	NA	0	NA	0	NA	0		NA	0	0	NA	0	0	0	0		NA	0	NA	0	0
AC194705.3_FG004	NA	NA	NA	NA	0		NA	0		0			NA	0	NA	0	NA	0	NA	0	NA	0	NA	0		NA	0	0	NA	0	0	0	0		NA	0	NA	0	0
AC194712.3_FG002	NA	NA	NA	NA	0		NA	0		0			NA	0	NA	0	NA	0	NA	0	NA	0	NA	0		NA	0	0	NA	0	0	0	0		NA	0	NA	0	0
AC194719.3_FG002	NA	NA	NA	NA	0		NA	0		0			NA	0	NA	0	NA	0	NA	0	NA	0	NA	0		NA	0	0	NA	0	0	0	0		NA	0	NA	0	0
AC194734.3_FG004	NA	NA	NA	NA	0		NA	0		0			NA	0	NA	0	NA	0	NA	0	NA	0	NA	0		NA	0	0	NA	0	0	0	0		NA	0	NA	0	0
AC194824.2_FG003	NA	NA	NA	NA	0		NA	0		0			NA	0	NA	0	NA	0	NA	0	NA	0	NA	0		NA	0	0	NA	0	0	0	0		NA	0	NA	0	0
AC194824.2_FG005	4	4	4	0.295211	0		0.682373	0		0			0.270183	0	0.254358	0	0.417779	0	0.130759	0	0.515163	0	0.458747	0		NA	0	0	NA	0	0	0	0		NA	0	NA	0	0
AC194828.3_FG004	NA	NA	NA	NA	0		NA	0		0			NA	0	NA	0	NA	0	NA	0	NA	0	NA	0		NA	0	0	NA	0	0	0	0		NA	0	NA	0	0
AC194828.3_FG012	NA	NA	NA	NA	0		NA	0		0			NA	0	NA	0	NA	0	NA	0	NA	0	NA	0		NA	0	0	NA	0	0	0	0		NA	0	NA	0	0
AC194839.3_FG001	NA	NA	NA	NA	0		NA	0		0			NA	0	NA	0	NA	0	NA	0	NA	0	NA	0		NA	0	0	NA	0	0	0	0		NA	0	NA	0	0
AC194852.3_FG007	0	3		0.358966	0		0.355751	0		0			0.005141	1	0.312188	0	0.23211	0	0.0426617	1	0.0538321	0	0.765839	0		NA	0	0	NA	0	0	0	0		NA	0	NA	0	0
AC194853.1_FG002	NA	NA	NA	NA	0		NA	0		0			NA	0	NA	0	NA	0	NA	0	NA	0	NA	0		NA	0	0	NA	0	0	0	0		NA	0	NA	0	0
AC194856.3_FG002	NA	NA	NA	NA	0		NA	0		0			NA	0	NA	0	NA	0	NA	0	NA	0	NA	0		NA	0	0	NA	0	0	0	0		NA	0	NA	0	0
AC194856.3_FG007	NA	NA	NA	NA	0		NA	0		0			NA	0	NA	0	NA	0	NA	0	NA	0	NA	0		NA	0	0	NA	0	0	0	0		NA	0	NA	0	0
AC194863.3_FG004	NA	NA	NA	NA	0		NA	0		0			NA	0	NA	0	NA	0	NA	0	NA	0	NA	0		NA	0	0	NA	0	0	0	0		NA	0	NA	0	0
AC194863.3_FG006	NA	NA	NA	NA	0		NA	0		0			NA	0	NA	0	NA	0	NA	0	NA	0	NA	0		NA	0	0	NA	0	0	0	0		NA	0	NA	0	0
AC194863.3_FG007	2	2	2	0.533505	0		0.642116	0		0			0.000719428	1	0.0944228	0	0.0826581	0	0.00182151	1	0.00110914	1	0.71998	0		NA	0	0	NA	0	0	0	0		NA	0	NA	0	0
AC194878.3_FG001	2	3		0.445283	0		0.586597	0		0			0.000253716	1	0.0852463	0	0.00402334	1	0.0247134	1	0.202275	0	0.473413	0		NA	0	0	NA	0	0	0	0		NA	0	NA	0	0
AC194878.3_FG002	2	2	2	0.598456	0		0.603734	0		0			0.000462201	1	0.0169571	1	0.0355818	1	0.13807	0	0.075383	0	0.63431	0		NA	0	0	NA	0	0	0	0		NA	0	NA	0	0
AC194895.3_FG004	NA	NA	NA	NA	0		NA	0		0			NA	0	NA	0	NA	0	NA	0	NA	0	NA	0		NA	0	0	NA	0	0	0	0		NA	0	NA	0	0
AC194897.4_FG003	NA	NA	NA	NA	0		NA	0		0			NA	0	NA	0	NA	0	NA	0	NA	0	NA	0		NA	0	0	NA	0	0	0	0		NA	0	NA	0	0
AC194897.4_FG005	4	4	4	0.593399	0		0.597108	0		0			0.11999	0	0.362317	0	0.223052	0	0.39056	0	0.499712	0	0.765058	0		NA	0	0	NA	0	0	0	0		NA	0	NA	0	0
AC194898.3_FG003	0	2		0.336177	0		0.571081	0		0			0.000806083	1	0.504303	0	0.058264	0	0.00318331	1	0.0782831	0	0.370477	0		NA	0	0	NA	0	0	0	0		NA	0	NA	0	0
AC194905.2_FG001	NA	NA	NA	NA	0		NA	0		0			NA	0	NA	0	NA	0	NA	0	NA	0	NA	0		NA	0	0	NA	0	0	0	0		NA	0	NA	0	0
AC194905.2_FG003	3	3	3	0.102408	0		0.0398758	1	3	0			1.88591e-06	1	0.000844183	1	0.000164475	1	0.0756038	0	0.189445	0	0.695797	0		0.564911	0	0	0.582429	0	0	0	0		0.114199	0	0.0880057	0	0
AC194912.3_FG003	NA	NA	NA	NA	0		NA	0		0			NA	0	NA	0	NA	0	NA	0	NA	0	NA	0		NA	0	0	NA	0	0	0	0		NA	0	NA	0	0
AC194914.3_FG002	2	0		0.634388	0		0.493796	0		0			0.00188388	1	0.145948	0	0.0319991	1	0.130228	0	0.327567	0	0.662774	0		0.162892	0	0	0.746888	0	0	0	0		0.0246096	1	0.209838	0	0
AC194937.3_FG004	0	0	0	0.664777	0		0.651637	0		0			0.0108884	1	0.293863	0	0.162022	0	0.0811471	0	0.140129	0	0.748452	0		NA	0	0	NA	0	0	0	0		NA	0	NA	0	0
AC194940.3_FG001	NA	NA	NA	NA	0		NA	0		0			NA	0	NA	0	NA	0	NA	0	NA	0	NA	0		NA	0	0	NA	0	0	0	0		NA	0	NA	0	0
AC194942.3_FG001	1	1	1	0.132689	0		0.09978	0		0			1.61221e-07	1	0.000515665	1	0.000193892	1	0.0172593	1	0.0375205	1	0.749815	0		NA	0	0	NA	0	0	0	0		NA	0	NA	0	0
AC194965.4_FG001	0	0	0	0.589942	0		0.693907	0		0			0.0318723	1	0.425937	0	0.227184	0	0.154101	0	0.287488	0	0.721832	0		NA	0	0	NA	0	0	0	0		NA	0	NA	0	0
AC194965.4_FG004	2	0		0.308496	0		0.343366	0		0			0.0319953	1	0.0689557	0	0.0437676	1	0.372939	0	0.461916	0	0.777109	0		0.681676	0	0	0.719513	0	0	0	0		0.0280118	1	0.057231	0	0
AC194970.5_FG001	0	4		0.65663	0		0.166497	0		0			0.137239	0	0.46091	0	0.0407193	1	0.340574	0	0.201566	0	0.382211	0		NA	0	0	NA	0	0	0	0		NA	0	NA	0	0
AC194970.5_FG002	4	4	4	0.517173	0		0.636724	0		0			0.0609777	0	0.539033	0	0.340641	0	0.141736	0	0.260706	0	0.729723	0		0.284512	0	0	0.291543	0	0	0	0		0.3312	0	0.358445	0	0
AC194970.5_FG004	1	1	1	0.65663	0		0.62778	0		0			1.00274e-06	1	0.0314307	1	0.0395789	1	0.0179535	1	0.011023	1	0.720238	0		NA	0	0	NA	0	0	0	0		NA	0	NA	0	0
AC194970.5_FG005	2	3		0.261352	0		0.592488	0		0			0.000724185	1	0.500426	0	0.043188	1	0.00517916	1	0.206217	0	0.35331	0		NA	0	0	NA	0	0	0	0		NA	0	NA	0	0
AC194970.5_FG009	4	4	4	0.206778	0		0.235269	0		0			0.129765	0	0.0881476	0	0.0590241	0	0.19567	0	0.26382	0	0.774164	0		NA	0	0	NA	0	0	0	0		NA	0	NA	0	0
AC194972.2_FG001	NA	NA	NA	NA	0		NA	0		0			NA	0	NA	0	NA	0	NA	0	NA	0	NA	0		NA	0	0	NA	0	0	0	0		NA	0	NA	0	0
AC194974.3_FG001	NA	NA	NA	NA	0		NA	0		0			NA	0	NA	0	NA	0	NA	0	NA	0	NA	0		NA	0	0	NA	0	0	0	0		NA	0	NA	0	0
AC194974.3_FG005	2	1		0.616437	0		0.364371	0		0			1.29422e-06	1	0.0488009	1	0.000863955	1	0.012541	1	0.183706	0	0.474634	0		NA	0	0	NA	0	0	0	0		NA	0	NA	0	0
AC194977.2_FG004	4	4	4	0.509796	0		0.64866	0		0			0.0943582	0	0.277327	0	0.369666	0	0.4183	0	0.298032	0	0.615561	0		NA	0	0	NA	0	0	0	0		NA	0	NA	0	0
AC194980.3_FG002	NA	NA	NA	NA	0		NA	0		0			NA	0	NA	0	NA	0	NA	0	NA	0	NA	0		NA	0	0	NA	0	0	0	0		NA	0	NA	0	0
AC194980.3_FG005	NA	NA	NA	NA	0		NA	0		0			NA	0	NA	0	NA	0	NA	0	NA	0	NA	0		NA	0	0	NA	0	0	0	0		NA	0	NA	0	0
AC195058.3_FG003	0	0	0	0.549059	0		0.630192	0		0			0.0457374	1	0.458046	0	0.164544	0	0.159847	0	0.397217	0	0.626351	0		NA	0	0	NA	0	0	0	0		NA	0	NA	0	0
AC195135.3_FG002	NA	NA	NA	NA	0		NA	0		0			NA	0	NA	0	NA	0	NA	0	NA	0	NA	0		NA	0	0	NA	0	0	0	0		NA	0	NA	0	0
AC195138.3_FG004	2	3		0.163987	0		0.0417948	1	2	0			0.0249013	1	0.423032	0	0.00187379	1	0.0130847	1	0.167522	0	0.00698326	1		0.210974	0	0	0.487479	0	0	0	0		1.18186e-11	1	1.95901e-07	1	1
AC195147.3_FG001	4	4	4	0.497605	0		0.637291	0		0			0.270067	0	0.399373	0	0.372203	0	0.305459	0	0.475416	0	0.714917	0		NA	0	0	NA	0	0	0	0		NA	0	NA	0	0
AC195147.3_FG008	2	3		0.397999	0		0.208186	0		0			0.00052951	1	0.366606	0	0.00234362	1	0.0134159	1	0.4844	0	0.174691	0		0.706421	0	0	0.441065	0	0	0	0		1.41038e-06	1	0.000575968	1	1
AC195148.3_FG001	NA	NA	NA	NA	0		NA	0		0			NA	0	NA	0	NA	0	NA	0	NA	0	NA	0		NA	0	0	NA	0	0	0	0		NA	0	NA	0	0
AC195154.3_FG004	0	0	0	0.612621	0		0.608816	0		0			0.0413963	1	0.426846	0	0.170433	0	0.182634	0	0.399283	0	0.664104	0		NA	0	0	NA	0	0	0	0		NA	0	NA	0	0
AC195168.2_FG004	NA	NA	NA	NA	0		NA	0		0			NA	0	NA	0	NA	0	NA	0	NA	0	NA	0		NA	0	0	NA	0	0	0	0		NA	0	NA	0	0
AC195172.3_FG001	1	1	1	2.1276e-05	1	1	5.07649e-06	1	1	1	1		1.08807e-18	1	0.0129162	1	0.0165251	1	9.21748e-13	1	3.16218e-13	1	0.725436	0		0.591795	0	0	0.634953	0	0	0	0		1.39123e-06	1	3.4288e-07	1	1
AC195174.2_FG007	NA	NA	NA	NA	0		NA	0		0			NA	0	NA	0	NA	0	NA	0	NA	0	NA	0		NA	0	0	NA	0	0	0	0		NA	0	NA	0	0
AC195207.2_FG002	NA	NA	NA	NA	0		NA	0		0			NA	0	NA	0	NA	0	NA	0	NA	0	NA	0		NA	0	0	NA	0	0	0	0		NA	0	NA	0	0
AC195214.3_FG007	NA	NA	NA	NA	0		NA	0		0			NA	0	NA	0	NA	0	NA	0	NA	0	NA	0		NA	0	0	NA	0	0	0	0		NA	0	NA	0	0
AC195220.3_FG003	NA	NA	NA	NA	0		NA	0		0			NA	0	NA	0	NA	0	NA	0	NA	0	NA	0		NA	0	0	NA	0	0	0	0		NA	0	NA	0	0
AC195220.3_FG004	NA	NA	NA	NA	0		NA	0		0			NA	0	NA	0	NA	0	NA	0	NA	0	NA	0		NA	0	0	NA	0	0	0	0		NA	0	NA	0	0
AC195220.3_FG007	NA	NA	NA	NA	0		NA	0		0			NA	0	NA	0	NA	0	NA	0	NA	0	NA	0		NA	0	0	NA	0	0	0	0		NA	0	NA	0	0
AC195230.2_FG003	NA	NA	NA	NA	0		NA	0		0			NA	0	NA	0	NA	0	NA	0	NA	0	NA	0		NA	0	0	NA	0	0	0	0		NA	0	NA	0	0
AC195235.3_FG003	0	2		0.613027	0		0.659307	0		0			0.00125332	1	0.241579	0	0.094035	0	0.0420966	1	0.114593	0	0.70691	0		0.608002	0	0	0.282603	0	0	0	0		0.173081	0	0.278554	0	0
AC195240.4_FG002	NA	NA	NA	NA	0		NA	0		0			NA	0	NA	0	NA	0	NA	0	NA	0	NA	0		NA	0	0	NA	0	0	0	0		NA	0	NA	0	0
AC195244.3_FG008	NA	NA	NA	NA	0		NA	0		0			NA	0	NA	0	NA	0	NA	0	NA	0	NA	0		NA	0	0	NA	0	0	0	0		NA	0	NA	0	0
AC195253.3_FG002	NA	NA	NA	NA	0		NA	0		0			NA	0	NA	0	NA	0	NA	0	NA	0	NA	0		NA	0	0	NA	0	0	0	0		NA	0	NA	0	0
AC195260.2_FG007	2	2	2	0.571038	0		0.305273	0		0			0.00253599	1	0.315137	0	0.437232	0	0.0436718	1	0.00894815	1	0.575874	0		NA	0	0	NA	0	0	0	0		NA	0	NA	0	0
AC195307.3_FG001	NA	NA	NA	NA	0		NA	0		0			NA	0	NA	0	NA	0	NA	0	NA	0	NA	0		NA	0	0	NA	0	0	0	0		NA	0	NA	0	0
AC195320.3_FG003	NA	NA	NA	NA	0		NA	0		0			NA	0	NA	0	NA	0	NA	0	NA	0	NA	0		NA	0	0	NA	0	0	0	0		NA	0	NA	0	0
AC195331.3_FG008	3	3	3	0.107772	0		0.280131	0		0			1.05768e-06	1	0.29076	0	0.0924331	0	0.00016409	1	0.0012889	1	0.668663	0		0.506072	0	0	0.305868	0	0	0	0		0.0662614	0	0.134862	0	0
AC195340.3_FG001	4	4	4	0.477083	0		0.691998	0		0			0.0791698	0	0.576577	0	0.290087	0	0.13378	0	0.361152	0	0.636411	0		0.695247	0	0	0.486516	0	0	0	0		5.86105e-05	1	0.0019745	1	1
AC195340.3_FG002	0	3		0.248935	0		0.64625	0		0			0.0459257	1	0.452986	0	0.30966	0	0.0329244	1	0.24786	0	0.526237	0		0.752224	0	0	0.736142	0	0	0	0		0.000245872	1	0.000197378	1	1
AC195340.3_FG004	4	4	4	0.482074	0		0.62624	0		0			0.155569	0	0.519597	0	0.431921	0	0.18735	0	0.341806	0	0.718	0		0.7482	0	0	0.663381	0	0	0	0		0.0564705	0	0.00858633	1	0
AC195340.3_FG005	NA	NA	NA	NA	0		NA	0		0			NA	0	NA	0	NA	0	NA	0	NA	0	NA	0		NA	0	0	NA	0	0	0	0		NA	0	NA	0	0
AC195342.3_FG002	NA	NA	NA	NA	0		NA	0		0			NA	0	NA	0	NA	0	NA	0	NA	0	NA	0		NA	0	0	NA	0	0	0	0		NA	0	NA	0	0
AC195343.3_FG002	1	1	1	1.24811e-06	1	1	6.16638e-06	1	1	1	1		8.83769e-24	1	1.73435e-14	1	4.63914e-14	1	3.91265e-08	1	2.37028e-09	1	0.693566	0		NA	0	0	NA	0	0	0	0		NA	0	NA	0	0
AC195347.4_FG004	0	4		0.563162	0		0.0340268	1	0	0			0.0753317	0	0.293972	0	0.00419603	1	0.371339	0	0.101647	0	0.278811	0		0.459934	0	0	0.226611	0	0	0	0		0.339936	0	0.1321	0	0
AC195348.3_FG004	NA	NA	NA	NA	0		NA	0		0			NA	0	NA	0	NA	0	NA	0	NA	0	NA	0		NA	0	0	NA	0	0	0	0		NA	0	NA	0	0
AC195351.3_FG001	NA	NA	NA	NA	0		NA	0		0			NA	0	NA	0	NA	0	NA	0	NA	0	NA	0		NA	0	0	NA	0	0	0	0		NA	0	NA	0	0
AC195351.3_FG003	NA	NA	NA	NA	0		NA	0		0			NA	0	NA	0	NA	0	NA	0	NA	0	NA	0		NA	0	0	NA	0	0	0	0		NA	0	NA	0	0
AC195367.3_FG001	NA	NA	NA	NA	0		NA	0		0			NA	0	NA	0	NA	0	NA	0	NA	0	NA	0		NA	0	0	NA	0	0	0	0		NA	0	NA	0	0
AC195370.3_FG004	NA	NA	NA	NA	0		NA	0		0			NA	0	NA	0	NA	0	NA	0	NA	0	NA	0		NA	0	0	NA	0	0	0	0		NA	0	NA	0	0
AC195378.3_FG001	NA	NA	NA	NA	0		NA	0		0			NA	0	NA	0	NA	0	NA	0	NA	0	NA	0		NA	0	0	NA	0	0	0	0		NA	0	NA	0	0
AC195389.3_FG001	NA	NA	NA	NA	0		NA	0		0			NA	0	NA	0	NA	0	NA	0	NA	0	NA	0		NA	0	0	NA	0	0	0	0		NA	0	NA	0	0
AC195402.3_FG001	NA	NA	NA	NA	0		NA	0		0			NA	0	NA	0	NA	0	NA	0	NA	0	NA	0		NA	0	0	NA	0	0	0	0		NA	0	NA	0	0
AC195458.3_FG001	NA	NA	NA	NA	0		NA	0		0			NA	0	NA	0	NA	0	NA	0	NA	0	NA	0		NA	0	0	NA	0	0	0	0		NA	0	NA	0	0
AC195484.3_FG003	4	4	4	0.599517	0		0.612849	0		0			0.123152	0	0.53575	0	0.256313	0	0.244523	0	0.474001	0	0.655525	0		NA	0	0	NA	0	0	0	0		NA	0	NA	0	0
AC195485.3_FG002	NA	NA	NA	NA	0		NA	0		0			NA	0	NA	0	NA	0	NA	0	NA	0	NA	0		NA	0	0	NA	0	0	0	0		NA	0	NA	0	0
AC195536.3_FG006	NA	NA	NA	NA	0		NA	0		0			NA	0	NA	0	NA	0	NA	0	NA	0	NA	0		NA	0	0	NA	0	0	0	0		NA	0	NA	0	0
AC195545.3_FG003	NA	NA	NA	NA	0		NA	0		0			NA	0	NA	0	NA	0	NA	0	NA	0	NA	0		NA	0	0	NA	0	0	0	0		NA	0	NA	0	0
AC195580.2_FG010	NA	NA	NA	NA	0		NA	0		0			NA	0	NA	0	NA	0	NA	0	NA	0	NA	0		NA	0	0	NA	0	0	0	0		NA	0	NA	0	0
AC195587.4_FG003	NA	NA	NA	NA	0		NA	0		0			NA	0	NA	0	NA	0	NA	0	NA	0	NA	0		NA	0	0	NA	0	0	0	0		NA	0	NA	0	0
AC195587.4_FG004	0	0	0	0.656817	0		0.581854	0		0			0.016915	1	0.280941	0	0.109313	0	0.194766	0	0.367625	0	0.703436	0		0.185792	0	0	0.743619	0	0	0	0		0.00415608	1	9.22645e-08	1	1
AC195596.3_FG002	NA	NA	NA	NA	0		NA	0		0			NA	0	NA	0	NA	0	NA	0	NA	0	NA	0		NA	0	0	NA	0	0	0	0		NA	0	NA	0	0
AC195596.3_FG005	NA	NA	NA	NA	0		NA	0		0			NA	0	NA	0	NA	0	NA	0	NA	0	NA	0		NA	0	0	NA	0	0	0	0		NA	0	NA	0	0
AC195608.3_FG005	NA	NA	NA	NA	0		NA	0		0			NA	0	NA	0	NA	0	NA	0	NA	0	NA	0		NA	0	0	NA	0	0	0	0		NA	0	NA	0	0
AC195608.3_FG006	NA	NA	NA	NA	0		NA	0		0			NA	0	NA	0	NA	0	NA	0	NA	0	NA	0		NA	0	0	NA	0	0	0	0		NA	0	NA	0	0
AC195685.3_FG001	NA	NA	NA	NA	0		NA	0		0			NA	0	NA	0	NA	0	NA	0	NA	0	NA	0		NA	0	0	NA	0	0	0	0		NA	0	NA	0	0
AC195785.3_FG004	4	4	4	0.504953	0		0.582409	0		0			0.265597	0	0.406906	0	0.366542	0	0.317821	0	0.377943	0	0.544765	0		0.508916	0	0	0.623207	0	0	0	0		0.0935106	0	0.224267	0	0
AC195794.3_FG002	NA	NA	NA	NA	0		NA	0		0			NA	0	NA	0	NA	0	NA	0	NA	0	NA	0		NA	0	0	NA	0	0	0	0		NA	0	NA	0	0
AC195796.3_FG001	0	4		0.579779	0		0.0852914	0		0			0.0708994	0	0.317357	0	0.10966	0	0.340239	0	0.0110953	1	0.17448	0		NA	0	0	NA	0	0	0	0		NA	0	NA	0	0
AC195798.3_FG001	NA	NA	NA	NA	0		NA	0		0			NA	0	NA	0	NA	0	NA	0	NA	0	NA	0		NA	0	0	NA	0	0	0	0		NA	0	NA	0	0
AC195806.3_FG001	NA	NA	NA	NA	0		NA	0		0			NA	0	NA	0	NA	0	NA	0	NA	0	NA	0		NA	0	0	NA	0	0	0	0		NA	0	NA	0	0
AC195807.3_FG004	4	4	4	0.32527	0		0.664924	0		0			0.220316	0	0.233708	0	0.368399	0	0.228497	0	0.499153	0	0.575293	0		NA	0	0	NA	0	0	0	0		NA	0	NA	0	0
AC195825.3_FG001	NA	NA	NA	NA	0		NA	0		0			NA	0	NA	0	NA	0	NA	0	NA	0	NA	0		NA	0	0	NA	0	0	0	0		NA	0	NA	0	0
AC195826.2_FG006	NA	NA	NA	NA	0		NA	0		0			NA	0	NA	0	NA	0	NA	0	NA	0	NA	0		NA	0	0	NA	0	0	0	0		NA	0	NA	0	0
AC195860.3_FG002	NA	NA	NA	NA	0		NA	0		0			NA	0	NA	0	NA	0	NA	0	NA	0	NA	0		NA	0	0	NA	0	0	0	0		NA	0	NA	0	0
AC195860.3_FG005	0	0	0	0.630155	0		0.682514	0		0			0.0142409	1	0.2445	0	0.21074	0	0.202473	0	0.200686	0	0.741932	0		0.313266	0	0	0.349239	0	0	0	0		0.00065729	1	0.000521542	1	1
AC195860.3_FG006	0	0	0	0.665638	0		0.634316	0		0			0.0393207	1	0.355241	0	0.186443	0	0.231403	0	0.369993	0	0.734793	0		0.761453	0	0	0.742956	0	0	0	0		0.05385	0	0.0591424	0	0
AC195864.3_FG017	2	3		0.485735	0		0.592517	0		0			0.0011299	1	0.293984	0	0.0378759	1	0.0344202	1	0.237172	0	0.536876	0		NA	0	0	NA	0	0	0	0		NA	0	NA	0	0
AC195864.3_FG020	NA	NA	NA	NA	0		NA	0		0			NA	0	NA	0	NA	0	NA	0	NA	0	NA	0		NA	0	0	NA	0	0	0	0		NA	0	NA	0	0
AC195874.2_FG002	3	3	3	0.000326041	1	3	0.206944	0		0			1.62046e-09	1	3.46423e-10	1	2.03883e-05	1	0.300324	0	0.129882	0	0.245025	0		0.581548	0	0	0.756765	0	0	0	0		0.235889	0	0.0555231	0	0
AC195914.2_FG002	0	0	0	0.562348	0		0.56617	0		0			0.0210038	1	0.226446	0	0.131058	0	0.22818	0	0.320765	0	0.765476	0		NA	0	0	NA	0	0	0	0		NA	0	NA	0	0
AC195914.2_FG003	NA	NA	NA	NA	0		NA	0		0			NA	0	NA	0	NA	0	NA	0	NA	0	NA	0		NA	0	0	NA	0	0	0	0		NA	0	NA	0	0
AC195920.3_FG006	NA	NA	NA	NA	0		NA	0		0			NA	0	NA	0	NA	0	NA	0	NA	0	NA	0		NA	0	0	NA	0	0	0	0		NA	0	NA	0	0
AC195946.3_FG003	NA	NA	NA	NA	0		NA	0		0			NA	0	NA	0	NA	0	NA	0	NA	0	NA	0		NA	0	0	NA	0	0	0	0		NA	0	NA	0	0
AC195954.3_FG001	NA	NA	NA	NA	0		NA	0		0			NA	0	NA	0	NA	0	NA	0	NA	0	NA	0		NA	0	0	NA	0	0	0	0		NA	0	NA	0	0
AC195957.3_FG003	0	0	0	0.419024	0		0.628994	0		0			0.0234719	1	0.095255	0	0.263003	0	0.412392	0	0.199438	0	0.516885	0		0.675716	0	0	0.722804	0	0	0	0		0.308223	0	0.189007	0	0
AC195959.2_FG004	0	0	0	0.632209	0		0.659044	0		0			0.00637819	1	0.22723	0	0.213385	0	0.102536	0	0.0851513	0	0.720314	0		NA	0	0	NA	0	0	0	0		NA	0	NA	0	0
AC195980.2_FG004	0	0	0	0.454416	0		0.547646	0		0			0.0147534	1	0.407287	0	0.245174	0	0.0806144	0	0.136185	0	0.755555	0		NA	0	0	NA	0	0	0	0		NA	0	NA	0	0
AC195989.3_FG004	NA	NA	NA	NA	0		NA	0		0			NA	0	NA	0	NA	0	NA	0	NA	0	NA	0		NA	0	0	NA	0	0	0	0		NA	0	NA	0	0
AC195995.3_FG006	NA	NA	NA	NA	0		NA	0		0			NA	0	NA	0	NA	0	NA	0	NA	0	NA	0		NA	0	0	NA	0	0	0	0		NA	0	NA	0	0
AC195995.3_FG008	NA	NA	NA	NA	0		NA	0		0			NA	0	NA	0	NA	0	NA	0	NA	0	NA	0		NA	0	0	NA	0	0	0	0		NA	0	NA	0	0
AC195999.3_FG005	NA	NA	NA	NA	0		NA	0		0			NA	0	NA	0	NA	0	NA	0	NA	0	NA	0		NA	0	0	NA	0	0	0	0		NA	0	NA	0	0
AC196002.2_FG002	NA	NA	NA	NA	0		NA	0		0			NA	0	NA	0	NA	0	NA	0	NA	0	NA	0		NA	0	0	NA	0	0	0	0		NA	0	NA	0	0
AC196008.1_FG001	0	4		0.637857	0		0.0839233	0		0			0.129468	0	0.435347	0	0.0838366	0	0.348926	0	0.0191081	1	0.218839	0		NA	0	0	NA	0	0	0	0		NA	0	NA	0	0
AC196008.1_FG004	NA	NA	NA	NA	0		NA	0		0			NA	0	NA	0	NA	0	NA	0	NA	0	NA	0		NA	0	0	NA	0	0	0	0		NA	0	NA	0	0
AC196009.2_FG008	NA	NA	NA	NA	0		NA	0		0			NA	0	NA	0	NA	0	NA	0	NA	0	NA	0		NA	0	0	NA	0	0	0	0		NA	0	NA	0	0
AC196018.3_FG003	NA	NA	NA	NA	0		NA	0		0			NA	0	NA	0	NA	0	NA	0	NA	0	NA	0		NA	0	0	NA	0	0	0	0		NA	0	NA	0	0
AC196019.3_FG001	NA	NA	NA	NA	0		NA	0		0			NA	0	NA	0	NA	0	NA	0	NA	0	NA	0		NA	0	0	NA	0	0	0	0		NA	0	NA	0	0
AC196025.3_FG001	NA	NA	NA	NA	0		NA	0		0			NA	0	NA	0	NA	0	NA	0	NA	0	NA	0		NA	0	0	NA	0	0	0	0		NA	0	NA	0	0
AC196025.3_FG002	NA	NA	NA	NA	0		NA	0		0			NA	0	NA	0	NA	0	NA	0	NA	0	NA	0		NA	0	0	NA	0	0	0	0		NA	0	NA	0	0
AC196025.3_FG008	NA	NA	NA	NA	0		NA	0		0			NA	0	NA	0	NA	0	NA	0	NA	0	NA	0		NA	0	0	NA	0	0	0	0		NA	0	NA	0	0
AC196025.3_FG009	NA	NA	NA	NA	0		NA	0		0			NA	0	NA	0	NA	0	NA	0	NA	0	NA	0		NA	0	0	NA	0	0	0	0		NA	0	NA	0	0
AC196025.3_FG010	NA	NA	NA	NA	0		NA	0		0			NA	0	NA	0	NA	0	NA	0	NA	0	NA	0		NA	0	0	NA	0	0	0	0		NA	0	NA	0	0
AC196025.3_FG011	4	4	4	0.472154	0		0.636821	0		0			0.23647	0	0.444064	0	0.430618	0	0.226972	0	0.410332	0	0.694604	0		NA	0	0	NA	0	0	0	0		NA	0	NA	0	0
AC196025.3_FG012	NA	NA	NA	NA	0		NA	0		0			NA	0	NA	0	NA	0	NA	0	NA	0	NA	0		NA	0	0	NA	0	0	0	0		NA	0	NA	0	0
AC196025.3_FG013	NA	NA	NA	NA	0		NA	0		0			NA	0	NA	0	NA	0	NA	0	NA	0	NA	0		NA	0	0	NA	0	0	0	0		NA	0	NA	0	0
AC196025.3_FG015	4	4	4	0.290515	0		0.689807	0		0			0.177915	0	0.318668	0	0.388747	0	0.0909141	0	0.424121	0	0.490384	0		NA	0	0	NA	0	0	0	0		NA	0	NA	0	0
AC196035.3_FG002	NA	NA	NA	NA	0		NA	0		0			NA	0	NA	0	NA	0	NA	0	NA	0	NA	0		NA	0	0	NA	0	0	0	0		NA	0	NA	0	0
AC196043.3_FG005	4	4	4	0.475284	0		0.541839	0		0			0.163886	0	0.29631	0	0.218704	0	0.356763	0	0.460261	0	0.76601	0		NA	0	0	NA	0	0	0	0		NA	0	NA	0	0
AC196048.2_FG001	NA	NA	NA	NA	0		NA	0		0			NA	0	NA	0	NA	0	NA	0	NA	0	NA	0		NA	0	0	NA	0	0	0	0		NA	0	NA	0	0
AC196059.3_FG003	4	4	4	0.413036	0		0.311076	0		0			0.145709	0	0.228027	0	0.0876143	0	0.326915	0	0.301219	0	0.714914	0		0.667184	0	0	0.719513	0	0	0	0		0.103768	0	0.266467	0	0
AC196065.3_FG001	NA	NA	NA	NA	0		NA	0		0			NA	0	NA	0	NA	0	NA	0	NA	0	NA	0		NA	0	0	NA	0	0	0	0		NA	0	NA	0	0
AC196066.3_FG003	0	0	0	0.539102	0		0.684767	0		0			0.00893052	1	0.132467	0	0.152504	0	0.267988	0	0.227843	0	0.705449	0		0.638737	0	0	0.214063	0	0	0	0		0.113966	0	0.278554	0	0
AC196082.3_FG001	1	1	1	0.0989462	0		0.086482	0		0			3.3007e-05	1	0.00447729	1	0.00235868	1	0.000227054	1	0.000415122	1	0.754813	0		0.499839	0	0	0.575354	0	0	0	0		0.0891335	0	0.0364811	1	0
AC196090.3_FG006	3	3	3	0.295428	0		0.239597	0		0			0.0182295	1	0.556713	0	0.374686	0	0.0288096	1	0.0255498	1	0.745436	0		0.73236	0	0	0.690626	0	0	0	0		0.150037	0	0.0307173	1	0
AC196096.3_FG005	NA	NA	NA	NA	0		NA	0		0			NA	0	NA	0	NA	0	NA	0	NA	0	NA	0		NA	0	0	NA	0	0	0	0		NA	0	NA	0	0
AC196105.3_FG002	NA	NA	NA	NA	0		NA	0		0			NA	0	NA	0	NA	0	NA	0	NA	0	NA	0		NA	0	0	NA	0	0	0	0		NA	0	NA	0	0
AC196106.2_FG001	NA	NA	NA	NA	0		NA	0		0			NA	0	NA	0	NA	0	NA	0	NA	0	NA	0		NA	0	0	NA	0	0	0	0		NA	0	NA	0	0
AC196110.4_FG004	NA	NA	NA	NA	0		NA	0		0			NA	0	NA	0	NA	0	NA	0	NA	0	NA	0		NA	0	0	NA	0	0	0	0		NA	0	NA	0	0
AC196123.3_FG001	NA	NA	NA	NA	0		NA	0		0			NA	0	NA	0	NA	0	NA	0	NA	0	NA	0		NA	0	0	NA	0	0	0	0		NA	0	NA	0	0
AC196130.3_FG002	NA	NA	NA	NA	0		NA	0		0			NA	0	NA	0	NA	0	NA	0	NA	0	NA	0		NA	0	0	NA	0	0	0	0		NA	0	NA	0	0
AC196135.3_FG006	NA	NA	NA	NA	0		NA	0		0			NA	0	NA	0	NA	0	NA	0	NA	0	NA	0		NA	0	0	NA	0	0	0	0		NA	0	NA	0	0
AC196143.2_FG003	NA	NA	NA	NA	0		NA	0		0			NA	0	NA	0	NA	0	NA	0	NA	0	NA	0		NA	0	0	NA	0	0	0	0		NA	0	NA	0	0
AC196154.3_FG014	NA	NA	NA	NA	0		NA	0		0			NA	0	NA	0	NA	0	NA	0	NA	0	NA	0		NA	0	0	NA	0	0	0	0		NA	0	NA	0	0
AC196154.3_FG018	4	4	4	0.5736	0		0.439276	0		0			0.275336	0	0.5138	0	0.253995	0	0.333833	0	0.268247	0	0.678166	0		NA	0	0	NA	0	0	0	0		NA	0	NA	0	0
AC196156.3_FG003	1	1	1	0.00016917	1	1	0.000111592	1	1	1	1		2.11227e-07	1	0.00448436	1	0.00579014	1	4.61338e-06	1	5.20163e-06	1	0.725436	0		0.595501	0	0	0.677612	0	0	0	0		3.60392e-06	1	2.4476e-07	1	1
AC196158.3_FG002	NA	NA	NA	NA	0		NA	0		0			NA	0	NA	0	NA	0	NA	0	NA	0	NA	0		NA	0	0	NA	0	0	0	0		NA	0	NA	0	0
AC196161.3_FG002	NA	NA	NA	NA	0		NA	0		0			NA	0	NA	0	NA	0	NA	0	NA	0	NA	0		NA	0	0	NA	0	0	0	0		NA	0	NA	0	0
AC196161.3_FG004	NA	NA	NA	NA	0		NA	0		0			NA	0	NA	0	NA	0	NA	0	NA	0	NA	0		NA	0	0	NA	0	0	0	0		NA	0	NA	0	0
AC196170.2_FG003	3	3	3	0.109597	0		0.369084	0		0			0.000767894	1	0.0113481	1	0.0261598	1	0.239023	0	0.0883928	0	0.553844	0		NA	0	0	NA	0	0	0	0		NA	0	NA	0	0
AC196171.6_FG002	NA	NA	NA	NA	0		NA	0		0			NA	0	NA	0	NA	0	NA	0	NA	0	NA	0		NA	0	0	NA	0	0	0	0		NA	0	NA	0	0
AC196202.3_FG007	2	2	2	0.276124	0		0.116153	0		0			0.000144463	1	0.0039677	1	0.0002991	1	0.310937	0	0.494958	0	0.658032	0		0.423311	0	0	0.494869	0	0	0	0		0.0845121	0	0.0525512	0	0
AC196206.3_FG007	NA	NA	NA	NA	0		NA	0		0			NA	0	NA	0	NA	0	NA	0	NA	0	NA	0		NA	0	0	NA	0	0	0	0		NA	0	NA	0	0
AC196212.3_FG001	NA	NA	NA	NA	0		NA	0		0			NA	0	NA	0	NA	0	NA	0	NA	0	NA	0		NA	0	0	NA	0	0	0	0		NA	0	NA	0	0
AC196213.3_FG001	4	4	4	0.587552	0		0.600678	0		0			0.288582	0	0.515213	0	0.354298	0	0.353436	0	0.43132	0	0.635464	0		NA	0	0	NA	0	0	0	0		NA	0	NA	0	0
AC196259.2_FG010	NA	NA	NA	NA	0		NA	0		0			NA	0	NA	0	NA	0	NA	0	NA	0	NA	0		NA	0	0	NA	0	0	0	0		NA	0	NA	0	0
AC196262.4_FG006	NA	NA	NA	NA	0		NA	0		0			NA	0	NA	0	NA	0	NA	0	NA	0	NA	0		NA	0	0	NA	0	0	0	0		NA	0	NA	0	0
AC196278.2_FG003	4	0		0.12337	0		0.546633	0		0			0.0707913	0	0.27033	0	0.158948	0	0.0150132	1	0.489245	0	0.180344	0		NA	0	0	NA	0	0	0	0		NA	0	NA	0	0
AC196278.2_FG004	3	0		0.499826	0		0.159122	0		0			0.00802728	1	0.429424	0	0.00691439	1	0.0577072	0	0.413362	0	0.207959	0		NA	0	0	NA	0	0	0	0		NA	0	NA	0	0
AC196278.2_FG005	0	0	0	0.643205	0		0.667291	0		0			0.0284515	1	0.381846	0	0.215185	0	0.129656	0	0.222981	0	0.738251	0		NA	0	0	NA	0	0	0	0		NA	0	NA	0	0
AC196290.3_FG007	NA	NA	NA	NA	0		NA	0		0			NA	0	NA	0	NA	0	NA	0	NA	0	NA	0		NA	0	0	NA	0	0	0	0		NA	0	NA	0	0
AC196394.3_FG002	0	0	0	0.267439	0		0.00718555	1	0	0			0.0516578	0	0.485709	0	0.0569098	0	0.0498744	1	0.00268228	1	0.400643	0		0.636988	0	0	0.64728	0	0	0	0		0.308223	0	0.119828	0	0
AC196395.3_FG001	4	4	4	0.431724	0		0.120125	0		0			0.264108	0	0.392679	0	0.0594146	0	0.216031	0	0.055478	0	0.469642	0		NA	0	0	NA	0	0	0	0		NA	0	NA	0	0
AC196412.3_FG001	NA	NA	NA	NA	0		NA	0		0			NA	0	NA	0	NA	0	NA	0	NA	0	NA	0		NA	0	0	NA	0	0	0	0		NA	0	NA	0	0
AC196417.3_FG008	NA	NA	NA	NA	0		NA	0		0			NA	0	NA	0	NA	0	NA	0	NA	0	NA	0		NA	0	0	NA	0	0	0	0		NA	0	NA	0	0
AC196420.4_FG002	2	3		0.141489	0		0.674192	0		0			0.000649131	1	0.00888789	1	0.130092	0	0.317749	0	0.0311416	1	0.307433	0		NA	0	0	NA	0	0	0	0		NA	0	NA	0	0
AC196426.3_FG007	2	2	2	0.231505	0		0.636466	0		0			3.15709e-05	1	0.413449	0	0.0740606	0	0.00104321	1	0.0322675	1	0.522784	0		0.681951	0	0	0.245255	0	0	0	0		0.0935365	0	0.303618	0	0
AC196431.2_FG001	0	0	0	0.539356	0		0.590576	0		0			0.00512157	1	0.129039	0	0.0878	0	0.209232	0	0.255233	0	0.771625	0		NA	0	0	NA	0	0	0	0		NA	0	NA	0	0
AC196432.3_FG007	NA	NA	NA	NA	0		NA	0		0			NA	0	NA	0	NA	0	NA	0	NA	0	NA	0		NA	0	0	NA	0	0	0	0		NA	0	NA	0	0
AC196436.3_FG002	NA	NA	NA	NA	0		NA	0		0			NA	0	NA	0	NA	0	NA	0	NA	0	NA	0		NA	0	0	NA	0	0	0	0		NA	0	NA	0	0
AC196437.3_FG001	4	4	4	0.136239	0		0.576818	0		0			0.127161	0	0.064895	0	0.446563	0	0.156484	0	0.261481	0	0.235906	0		NA	0	0	NA	0	0	0	0		NA	0	NA	0	0
AC196439.3_FG002	NA	NA	NA	NA	0		NA	0		0			NA	0	NA	0	NA	0	NA	0	NA	0	NA	0		NA	0	0	NA	0	0	0	0		NA	0	NA	0	0
AC196465.3_FG002	4	4	4	0.656633	0		0.630578	0		0			0.252125	0	0.563356	0	0.419097	0	0.392232	0	0.417047	0	0.741381	0		NA	0	0	NA	0	0	0	0		NA	0	NA	0	0
AC196465.3_FG006	3	0		0.545348	0		0.351625	0		0			0.00733766	1	0.382389	0	0.0259816	1	0.0722018	0	0.480813	0	0.397252	0		NA	0	0	NA	0	0	0	0		NA	0	NA	0	0
AC196470.3_FG007	0	0	0	0.335426	0		0.485489	0		0			0.0343705	1	0.0921319	0	0.428567	0	0.399333	0	0.105125	0	0.323882	0		0.762675	0	0	0.757021	0	0	0	0		0.146054	0	0.173734	0	0
AC196475.3_FG004	4	4	4	0.519145	0		0.415938	0		0			0.0702319	0	0.550002	0	0.0946795	0	0.14983	0	0.456164	0	0.417637	0		0.622395	0	0	0.574996	0	0	0	0		0.164901	0	0.173142	0	0
AC196475.3_FG005	0	0	0	0.586252	0		0.673578	0		0			0.0246479	1	0.413485	0	0.194104	0	0.138436	0	0.294476	0	0.700664	0		0.324202	0	0	0.405581	0	0	0	0		0.0228095	1	0.0486901	1	1
AC196488.3_FG007	NA	NA	NA	NA	0		NA	0		0			NA	0	NA	0	NA	0	NA	0	NA	0	NA	0		NA	0	0	NA	0	0	0	0		NA	0	NA	0	0
AC196489.3_FG002	0	3		0.529426	0		0.685328	0		0			0.00018247	1	0.21916	0	0.0605431	0	0.0218376	1	0.0947612	0	0.668531	0		NA	0	0	NA	0	0	0	0		NA	0	NA	0	0
AC196502.3_FG003	1	1	1	0.0786922	0		0.00437332	1	1	0			1.3202e-11	1	2.12053e-05	1	5.76756e-07	1	1.89377e-08	1	1.38301e-05	1	0.406342	0		NA	0	0	NA	0	0	0	0		NA	0	NA	0	0
AC196575.3_FG007	NA	NA	NA	NA	0		NA	0		0			NA	0	NA	0	NA	0	NA	0	NA	0	NA	0		NA	0	0	NA	0	0	0	0		NA	0	NA	0	0
AC196637.2_FG002	0	0	0	0.585286	0		0.400132	0		0			0.0173725	1	0.372667	0	0.422238	0	0.129756	0	0.0641098	0	0.647927	0		NA	0	0	NA	0	0	0	0		NA	0	NA	0	0
AC196642.4_FG003	NA	NA	NA	NA	0		NA	0		0			NA	0	NA	0	NA	0	NA	0	NA	0	NA	0		NA	0	0	NA	0	0	0	0		NA	0	NA	0	0
AC196708.3_FG006	2	1		0.610052	0		0.113519	0		0			1.74762e-10	1	0.00785224	1	1.23062e-06	1	0.00125987	1	0.184666	0	0.250639	0		0.693031	0	0	0.590589	0	0	0	0		1.1726e-10	1	8.92646e-08	1	1
AC196709.3_FG001	NA	NA	NA	NA	0		NA	0		0			NA	0	NA	0	NA	0	NA	0	NA	0	NA	0		NA	0	0	NA	0	0	0	0		NA	0	NA	0	0
AC196710.3_FG013	0	0	0	0.324116	0		0.666347	0		0			0.0299315	1	0.10697	0	0.213678	0	0.424668	0	0.258394	0	0.565272	0		NA	0	0	NA	0	0	0	0		NA	0	NA	0	0
AC196714.3_FG004	4	4	4	0.566756	0		0.359032	0		0			0.103329	0	0.336503	0	0.306731	0	0.384304	0	0.107311	0	0.414789	0		NA	0	0	NA	0	0	0	0		NA	0	NA	0	0
AC196719.3_FG002	4	4	4	0.197108	0		0.389623	0		0			0.258832	0	0.219433	0	0.244136	0	0.099164	0	0.237952	0	0.686875	0		NA	0	0	NA	0	0	0	0		NA	0	NA	0	0
AC196726.2_FG001	4	4	4	0.56587	0		0.627625	0		0			0.0854403	0	0.314543	0	0.235602	0	0.370956	0	0.43132	0	0.76601	0		NA	0	0	NA	0	0	0	0		NA	0	NA	0	0
AC196728.3_FG003	NA	NA	NA	NA	0		NA	0		0			NA	0	NA	0	NA	0	NA	0	NA	0	NA	0		NA	0	0	NA	0	0	0	0		NA	0	NA	0	0
AC196779.3_FG003	2	2	2	0.517135	0		0.324417	0		0			0.000213099	1	0.0341414	1	0.00390704	1	0.151298	0	0.372362	0	0.649492	0		NA	0	0	NA	0	0	0	0		NA	0	NA	0	0
AC196780.4_FG003	NA	NA	NA	NA	0		NA	0		0			NA	0	NA	0	NA	0	NA	0	NA	0	NA	0		NA	0	0	NA	0	0	0	0		NA	0	NA	0	0
AC196789.3_FG001	2	0		0.51892	0		0.63219	0		0			0.00412634	1	0.157223	0	0.0257265	1	0.0763185	0	0.262468	0	0.586888	0		NA	0	0	NA	0	0	0	0		NA	0	NA	0	0
AC196795.4_FG009	NA	NA	NA	NA	0		NA	0		0			NA	0	NA	0	NA	0	NA	0	NA	0	NA	0		NA	0	0	NA	0	0	0	0		NA	0	NA	0	0
AC196954.2_FG012	NA	NA	NA	NA	0		NA	0		0			NA	0	NA	0	NA	0	NA	0	NA	0	NA	0		NA	0	0	NA	0	0	0	0		NA	0	NA	0	0
AC196956.3_FG003	4	4	4	0.647632	0		0.500492	0		0			0.295368	0	0.566649	0	0.280199	0	0.411073	0	0.340522	0	0.61685	0		NA	0	0	NA	0	0	0	0		NA	0	NA	0	0
AC196957.3_FG005	0	0	0	0.515042	0		0.514122	0		0			0.0051016	1	0.132828	0	0.0733217	0	0.147417	0	0.220531	0	0.765389	0		NA	0	0	NA	0	0	0	0		NA	0	NA	0	0
AC196961.2_FG003	4	4	4	0.605032	0		0.50475	0		0			0.0525279	0	0.450523	0	0.118282	0	0.192766	0	0.498444	0	0.5716	0		0.551809	0	0	0.519212	0	0	0	0		0.264542	0	0.234209	0	0
AC196961.2_FG004	NA	NA	NA	NA	0		NA	0		0			NA	0	NA	0	NA	0	NA	0	NA	0	NA	0		NA	0	0	NA	0	0	0	0		NA	0	NA	0	0
AC196972.3_FG009	NA	NA	NA	NA	0		NA	0		0			NA	0	NA	0	NA	0	NA	0	NA	0	NA	0		NA	0	0	NA	0	0	0	0		NA	0	NA	0	0
AC196974.3_FG008	4	4	4	0.547559	0		0.325824	0		0			0.144052	0	0.569638	0	0.113812	0	0.219654	0	0.337421	0	0.398943	0		NA	0	0	NA	0	0	0	0		NA	0	NA	0	0
AC196978.5_FG002	4	4	4	0.638801	0		0.638207	0		0			0.0958368	0	0.471734	0	0.379297	0	0.261681	0	0.292682	0	0.762437	0		NA	0	0	NA	0	0	0	0		NA	0	NA	0	0
AC196978.5_FG007	3	3	3	0.0680059	0		0.146	0		0			0.000811826	1	0.0101633	1	0.0109398	1	0.18124	0	0.103044	0	0.652175	0		NA	0	0	NA	0	0	0	0		NA	0	NA	0	0
AC196984.3_FG001	0	2		0.566307	0		0.578614	0		0			0.00152405	1	0.0478157	1	0.118034	0	0.194103	0	0.0832729	0	0.590101	0		NA	0	0	NA	0	0	0	0		NA	0	NA	0	0
AC197013.3_FG003	4	4	4	0.440271	0		0.418538	0		0			0.125599	0	0.511347	0	0.342897	0	0.143231	0	0.15573	0	0.759889	0		NA	0	0	NA	0	0	0	0		NA	0	NA	0	0
AC197021.3_FG004	NA	NA	NA	NA	0		NA	0		0			NA	0	NA	0	NA	0	NA	0	NA	0	NA	0		NA	0	0	NA	0	0	0	0		NA	0	NA	0	0
AC197029.3_FG001	NA	NA	NA	NA	0		NA	0		0			NA	0	NA	0	NA	0	NA	0	NA	0	NA	0		NA	0	0	NA	0	0	0	0		NA	0	NA	0	0
AC197029.3_FG003	4	4	4	0.621579	0		0.66868	0		0			0.167656	0	0.543807	0	0.404037	0	0.305274	0	0.393103	0	0.77144	0		0.474216	0	0	0.731749	0	0	0	0		0.321081	0	0.0578472	0	0
AC197038.3_FG001	0	0	0	0.396713	0		0.542323	0		0			0.00874233	1	0.11263	0	0.102317	0	0.153297	0	0.125255	0	0.712593	0		NA	0	0	NA	0	0	0	0		NA	0	NA	0	0
AC197041.3_FG001	NA	NA	NA	NA	0		NA	0		0			NA	0	NA	0	NA	0	NA	0	NA	0	NA	0		NA	0	0	NA	0	0	0	0		NA	0	NA	0	0
AC197047.3_FG001	2	2	2	0.279847	0		0.0474564	1	2	0			0.000450922	1	0.00608743	1	0.000117879	1	0.35088	0	0.332162	0	0.535952	0		NA	0	0	NA	0	0	0	0		NA	0	NA	0	0
AC197054.3_FG002	NA	NA	NA	NA	0		NA	0		0			NA	0	NA	0	NA	0	NA	0	NA	0	NA	0		NA	0	0	NA	0	0	0	0		NA	0	NA	0	0
AC197055.3_FG003	NA	NA	NA	NA	0		NA	0		0			NA	0	NA	0	NA	0	NA	0	NA	0	NA	0		NA	0	0	NA	0	0	0	0		NA	0	NA	0	0
AC197056.3_FG002	4	4	4	0.426497	0		0.586905	0		0			0.234986	0	0.311665	0	0.302825	0	0.27857	0	0.45208	0	0.714298	0		NA	0	0	NA	0	0	0	0		NA	0	NA	0	0
AC197056.3_FG005	4	0		0.199254	0		0.589399	0		0			0.0910523	0	0.339018	0	0.417779	0	0.0352043	1	0.246208	0	0.539396	0		NA	0	0	NA	0	0	0	0		NA	0	NA	0	0
AC197082.3_FG004	NA	NA	NA	NA	0		NA	0		0			NA	0	NA	0	NA	0	NA	0	NA	0	NA	0		NA	0	0	NA	0	0	0	0		NA	0	NA	0	0
AC197082.3_FG005	NA	NA	NA	NA	0		NA	0		0			NA	0	NA	0	NA	0	NA	0	NA	0	NA	0		NA	0	0	NA	0	0	0	0		NA	0	NA	0	0
AC197109.3_FG004	NA	NA	NA	NA	0		NA	0		0			NA	0	NA	0	NA	0	NA	0	NA	0	NA	0		NA	0	0	NA	0	0	0	0		NA	0	NA	0	0
AC197118.3_FG005	4	4	4	0.42714	0		0.575235	0		0			0.0873535	0	0.192322	0	0.189984	0	0.385131	0	0.487541	0	0.721768	0		NA	0	0	NA	0	0	0	0		NA	0	NA	0	0
AC197122.3_FG003	0	2		0.0601303	0		0.690439	0		0			0.0108782	1	0.30859	0	0.188946	0	0.00158694	1	0.204111	0	0.245821	0		0.497626	0	0	0.677263	0	0	0	0		0.020924	1	0.0526994	0	0
AC197124.3_FG002	NA	NA	NA	NA	0		NA	0		0			NA	0	NA	0	NA	0	NA	0	NA	0	NA	0		NA	0	0	NA	0	0	0	0		NA	0	NA	0	0
AC197124.3_FG004	NA	NA	NA	NA	0		NA	0		0			NA	0	NA	0	NA	0	NA	0	NA	0	NA	0		NA	0	0	NA	0	0	0	0		NA	0	NA	0	0
AC197140.2_FG001	NA	NA	NA	NA	0		NA	0		0			NA	0	NA	0	NA	0	NA	0	NA	0	NA	0		NA	0	0	NA	0	0	0	0		NA	0	NA	0	0
AC197143.3_FG007	4	0		0.110952	0		0.580968	0		0			0.0935955	0	0.256354	0	0.41736	0	0.0220138	1	0.248262	0	0.452079	0		0.597722	0	0	0.588735	0	0	0	0		0.344849	0	0.333007	0	0
AC197143.3_FG010	NA	NA	NA	NA	0		NA	0		0			NA	0	NA	0	NA	0	NA	0	NA	0	NA	0		NA	0	0	NA	0	0	0	0		NA	0	NA	0	0
AC197145.4_FG001	NA	NA	NA	NA	0		NA	0		0			NA	0	NA	0	NA	0	NA	0	NA	0	NA	0		NA	0	0	NA	0	0	0	0		NA	0	NA	0	0
AC197146.3_FG001	0	0	0	0.366094	0		0.487075	0		0			0.0305533	1	0.56822	0	0.414202	0	0.0523361	0	0.110571	0	0.741303	0		0.348854	0	0	0.723806	0	0	0	0		0.0372856	1	0.36834	0	0
AC197146.3_FG002	0	0	0	0.638927	0		0.633457	0		0			0.00550603	1	0.150875	0	0.160721	0	0.178564	0	0.145548	0	0.709536	0		0.218095	0	0	0.219658	0	0	0	0		0.404823	0	0.340373	0	0
AC197150.3_FG003	1	1	1	0.599158	0		0.68536	0		0			1.57865e-08	1	0.00823981	1	0.0116232	1	0.00825772	1	0.00442473	1	0.720304	0		0.360526	0	0	0.284595	0	0	0	0		0.404823	0	0.359111	0	0
AC197164.4_FG002	NA	NA	NA	NA	0		NA	0		0			NA	0	NA	0	NA	0	NA	0	NA	0	NA	0		NA	0	0	NA	0	0	0	0		NA	0	NA	0	0
AC197230.3_FG001	0	0	0	0.648247	0		0.519283	0		0			0.00412014	1	0.214986	0	0.0600252	0	0.113735	0	0.289774	0	0.667162	0		NA	0	0	NA	0	0	0	0		NA	0	NA	0	0
AC197242.3_FG001	NA	NA	NA	NA	0		NA	0		0			NA	0	NA	0	NA	0	NA	0	NA	0	NA	0		NA	0	0	NA	0	0	0	0		NA	0	NA	0	0
AC197246.3_FG001	0	0	0	0.615129	0		0.631934	0		0			0.00214828	1	0.237826	0	0.0781684	0	0.0790695	0	0.213213	0	0.687933	0		0.613137	0	0	0.507898	0	0	0	0		0.289361	0	0.389773	0	0
AC197246.3_FG003	0	0	0	0.636985	0		0.528091	0		0			0.0179746	1	0.336631	0	0.356812	0	0.159848	0	0.106004	0	0.683916	0		NA	0	0	NA	0	0	0	0		NA	0	NA	0	0
AC197265.3_FG005	NA	NA	NA	NA	0		NA	0		0			NA	0	NA	0	NA	0	NA	0	NA	0	NA	0		NA	0	0	NA	0	0	0	0		NA	0	NA	0	0
AC197267.3_FG001	NA	NA	NA	NA	0		NA	0		0			NA	0	NA	0	NA	0	NA	0	NA	0	NA	0		NA	0	0	NA	0	0	0	0		NA	0	NA	0	0
AC197274.4_FG010	3	0		0.401426	0		0.215865	0		0			0.0319275	1	0.56976	0	0.323936	0	0.0667632	0	0.0299129	1	0.662315	0		0.386058	0	0	0.688068	0	0	0	0		0.0572764	0	0.266467	0	0
AC197340.3_FG003	4	4	4	0.535434	0		0.478181	0		0			0.227831	0	0.513769	0	0.218053	0	0.272087	0	0.368332	0	0.481002	0		0.620299	0	0	0.519212	0	0	0	0		0.0707062	0	0.234603	0	0
AC197340.3_FG004	NA	NA	NA	NA	0		NA	0		0			NA	0	NA	0	NA	0	NA	0	NA	0	NA	0		NA	0	0	NA	0	0	0	0		NA	0	NA	0	0
AC197347.3_FG003	3	0		0.260422	0		0.203865	0		0			0.00755737	1	0.0540098	0	0.0234164	1	0.343476	0	0.483165	0	0.739398	0		NA	0	0	NA	0	0	0	0		NA	0	NA	0	0
AC197355.3_FG001	4	4	4	0.624052	0		0.390459	0		0			0.119287	0	0.510372	0	0.322347	0	0.268394	0	0.132493	0	0.597926	0		NA	0	0	NA	0	0	0	0		NA	0	NA	0	0
AC197373.4_FG005	8	4		0.639219	0		0.0371831	1	8	0			0.179503	0	0.534515	0	0.0406544	1	0.330119	0	0.0121299	1	0.201298	0		NA	0	0	NA	0	0	0	0		NA	0	NA	0	0
AC197376.3_FG001	NA	NA	NA	NA	0		NA	0		0			NA	0	NA	0	NA	0	NA	0	NA	0	NA	0		NA	0	0	NA	0	0	0	0		NA	0	NA	0	0
AC197377.3_FG001	NA	NA	NA	NA	0		NA	0		0			NA	0	NA	0	NA	0	NA	0	NA	0	NA	0		NA	0	0	NA	0	0	0	0		NA	0	NA	0	0
AC197377.3_FG004	NA	NA	NA	NA	0		NA	0		0			NA	0	NA	0	NA	0	NA	0	NA	0	NA	0		NA	0	0	NA	0	0	0	0		NA	0	NA	0	0
AC197387.3_FG004	NA	NA	NA	NA	0		NA	0		0			NA	0	NA	0	NA	0	NA	0	NA	0	NA	0		NA	0	0	NA	0	0	0	0		NA	0	NA	0	0
AC197427.3_FG003	0	0	0	0.395346	0		0.603174	0		0			0.0326258	1	0.143922	0	0.170859	0	0.385823	0	0.330828	0	0.677976	0		NA	0	0	NA	0	0	0	0		NA	0	NA	0	0
AC197432.4_FG001	0	0	0	0.585756	0		0.318595	0		0			0.0209347	1	0.218535	0	0.369289	0	0.157381	0	0.0825342	0	0.553219	0		NA	0	0	NA	0	0	0	0		NA	0	NA	0	0
AC197477.3_FG002	NA	NA	NA	NA	0		NA	0		0			NA	0	NA	0	NA	0	NA	0	NA	0	NA	0		NA	0	0	NA	0	0	0	0		NA	0	NA	0	0
AC197526.3_FG003	0	0	0	0.543852	0		0.450309	0		0			0.0316196	1	0.495791	0	0.435699	0	0.0941131	0	0.0741186	0	0.6999	0		NA	0	0	NA	0	0	0	0		NA	0	NA	0	0
AC197541.3_FG009	4	4	4	0.398045	0		0.621143	0		0			0.0854024	0	0.528889	0	0.37087	0	0.108572	0	0.279349	0	0.66616	0		NA	0	0	NA	0	0	0	0		NA	0	NA	0	0
AC197544.3_FG002	NA	NA	NA	NA	0		NA	0		0			NA	0	NA	0	NA	0	NA	0	NA	0	NA	0		NA	0	0	NA	0	0	0	0		NA	0	NA	0	0
AC197545.3_FG002	4	0		0.132267	0		0.584868	0		0			0.0852359	0	0.267066	0	0.416582	0	0.0192447	1	0.237245	0	0.465711	0		0.467632	0	0	0.752929	0	0	0	0		0.207388	0	0.0109174	1	0
AC197555.3_FG008	2	3		0.300523	0		0.659694	0		0			5.22817e-05	1	0.358525	0	0.034023	1	0.00272539	1	0.0880117	0	0.456489	0		0.132937	0	0	0.164948	0	0	0	0		0.0311356	1	0.0512475	0	0
AC197575.3_FG008	NA	NA	NA	NA	0		NA	0		0			NA	0	NA	0	NA	0	NA	0	NA	0	NA	0		NA	0	0	NA	0	0	0	0		NA	0	NA	0	0
AC197577.2_FG002	NA	NA	NA	NA	0		NA	0		0			NA	0	NA	0	NA	0	NA	0	NA	0	NA	0		NA	0	0	NA	0	0	0	0		NA	0	NA	0	0
AC197578.4_FG001	4	4	4	0.213769	0		0.452475	0		0			0.108127	0	0.0829422	0	0.135415	0	0.219966	0	0.445603	0	0.660648	0		NA	0	0	NA	0	0	0	0		NA	0	NA	0	0
AC197583.2_FG003	NA	NA	NA	NA	0		NA	0		0			NA	0	NA	0	NA	0	NA	0	NA	0	NA	0		NA	0	0	NA	0	0	0	0		NA	0	NA	0	0
AC197595.3_FG001	NA	NA	NA	NA	0		NA	0		0			NA	0	NA	0	NA	0	NA	0	NA	0	NA	0		NA	0	0	NA	0	0	0	0		NA	0	NA	0	0
AC197672.3_FG002	4	4	4	0.145133	0		0.694577	0		0			0.237725	0	0.166365	0	0.420143	0	0.0549388	0	0.47475	0	0.363915	0		0.712563	0	0	0.664181	0	0	0	0		0.00696142	1	2.22394e-05	1	1
AC197697.3_FG001	NA	NA	NA	NA	0		NA	0		0			NA	0	NA	0	NA	0	NA	0	NA	0	NA	0		NA	0	0	NA	0	0	0	0		NA	0	NA	0	0
AC197699.3_FG002	0	0	0	0.6	0		0.568851	0		0			0.0285071	1	0.393777	0	0.112666	0	0.162009	0	0.419757	0	0.616539	0		0.606796	0	0	0.705363	0	0	0	0		0.0350215	1	0.035448	1	1
AC197699.3_FG003	3	3	3	0.270247	0		0.542509	0		0			0.00259036	1	0.0186782	1	0.0495881	1	0.388831	0	0.290816	0	0.639857	0		0.606654	0	0	0.235621	0	0	0	0		0.152826	0	0.00427392	1	0
AC197699.3_FG005	NA	NA	NA	NA	0		NA	0		0			NA	0	NA	0	NA	0	NA	0	NA	0	NA	0		NA	0	0	NA	0	0	0	0		NA	0	NA	0	0
AC197699.3_FG006	NA	NA	NA	NA	0		NA	0		0			NA	0	NA	0	NA	0	NA	0	NA	0	NA	0		NA	0	0	NA	0	0	0	0		NA	0	NA	0	0
AC197699.3_FG008	0	0	0	0.433313	0		0.415257	0		0			0.0151142	1	0.14823	0	0.0816477	0	0.193241	0	0.290507	0	0.756478	0		NA	0	0	NA	0	0	0	0		NA	0	NA	0	0
AC197699.3_FG009	NA	NA	NA	NA	0		NA	0		0			NA	0	NA	0	NA	0	NA	0	NA	0	NA	0		NA	0	0	NA	0	0	0	0		NA	0	NA	0	0
AC197699.3_FG010	NA	NA	NA	NA	0		NA	0		0			NA	0	NA	0	NA	0	NA	0	NA	0	NA	0		NA	0	0	NA	0	0	0	0		NA	0	NA	0	0
AC197705.4_FG001	3	3	3	0.257793	0		0.277313	0		0			1.06145e-08	1	0.000225049	1	0.000129417	1	0.0637631	0	0.0935858	0	0.777689	0		0.0240677	1	0	0.00261874	1	0	1	0		0.404823	0	0.0925315	0	0
AC197705.4_FG003	2	2	2	0.199194	0		0.0159899	1	2	0			0.0187073	1	0.466433	0	0.0911787	0	0.013581	1	0.000660127	1	0.502943	0		0.469461	0	0	0.410655	0	0	0	0		0.357646	0	0.345397	0	0
AC197705.4_FG004	3	3	3	0.0435492	1	3	0.301092	0		0			0.0224869	1	0.267918	0	0.423868	0	0.00408307	1	0.0498387	1	0.549771	0		NA	0	0	NA	0	0	0	0		NA	0	NA	0	0
AC197705.4_FG006	2	3		0.496183	0		0.473579	0		0			6.51347e-06	1	0.134458	0	0.00348017	1	0.00692727	1	0.154003	0	0.441482	0		0.549923	0	0	0.318504	0	0	0	0		0.0017539	1	0.0183537	1	1
AC197705.4_FG007	4	4	4	0.505157	0		0.437917	0		0			0.22921	0	0.378503	0	0.196689	0	0.34074	0	0.340252	0	0.727052	0		0.579679	0	0	0.683896	0	0	0	0		0.146712	0	0.255859	0	0
AC197705.4_FG008	4	4	4	0.197283	0		0.559478	0		0			0.167917	0	0.090961	0	0.231629	0	0.137402	0	0.471225	0	0.522784	0		NA	0	0	NA	0	0	0	0		NA	0	NA	0	0
AC197705.4_FG011	0	3		0.23741	0		0.667291	0		0			0.0221843	1	0.0393884	1	0.183416	0	0.351313	0	0.290278	0	0.493921	0		0.706195	0	0	0.756854	0	0	0	0		0.188255	0	0.266467	0	0
AC197714.3_FG004	0	0	0	0.605974	0		0.643115	0		0			0.0444857	1	0.44153	0	0.203076	0	0.178896	0	0.363033	0	0.689277	0		NA	0	0	NA	0	0	0	0		NA	0	NA	0	0
AC197717.3_FG002	1	3		0.00349037	1	3	0.344426	0		0			7.28827e-17	1	0.224515	0	0.00226132	1	6.93112e-12	1	8.88139e-07	1	0.290757	0		0.674475	0	0	0.717602	0	0	0	0		2.72837e-07	1	7.50096e-07	1	1
AC197718.3_FG002	NA	NA	NA	NA	0		NA	0		0			NA	0	NA	0	NA	0	NA	0	NA	0	NA	0		NA	0	0	NA	0	0	0	0		NA	0	NA	0	0
AC197738.3_FG007	NA	NA	NA	NA	0		NA	0		0			NA	0	NA	0	NA	0	NA	0	NA	0	NA	0		NA	0	0	NA	0	0	0	0		NA	0	NA	0	0
AC197757.3_FG002	NA	NA	NA	NA	0		NA	0		0			NA	0	NA	0	NA	0	NA	0	NA	0	NA	0		NA	0	0	NA	0	0	0	0		NA	0	NA	0	0
AC197757.3_FG003	NA	NA	NA	NA	0		NA	0		0			NA	0	NA	0	NA	0	NA	0	NA	0	NA	0		NA	0	0	NA	0	0	0	0		NA	0	NA	0	0
AC197758.3_FG004	1	1	1	0.000173638	1	1	9.41505e-07	1	1	1	1		2.9299e-98	1	5.37345e-14	1	2.76713e-11	1	2.89204e-42	1	7.93401e-48	1	0.575874	0		0.57472	0	0	0.662855	0	0	0	0		1.31781e-15	1	1.03123e-17	1	1
AC197764.4_FG003	4	4	4	0.336177	0		0.500065	0		0			0.244307	0	0.327742	0	0.315326	0	0.149116	0	0.292454	0	0.714298	0		NA	0	0	NA	0	0	0	0		NA	0	NA	0	0
AC197770.3_FG002	3	3	3	0.0116878	1	3	0.252184	0		0			0.0129776	1	0.00332424	1	0.0302387	1	0.116708	0	0.513561	0	0.437994	0		NA	0	0	NA	0	0	0	0		NA	0	NA	0	0
AC197771.3_FG001	NA	NA	NA	NA	0		NA	0		0			NA	0	NA	0	NA	0	NA	0	NA	0	NA	0		NA	0	0	NA	0	0	0	0		NA	0	NA	0	0
AC197783.3_FG005	NA	NA	NA	NA	0		NA	0		0			NA	0	NA	0	NA	0	NA	0	NA	0	NA	0		NA	0	0	NA	0	0	0	0		NA	0	NA	0	0
AC197835.3_FG001	NA	NA	NA	NA	0		NA	0		0			NA	0	NA	0	NA	0	NA	0	NA	0	NA	0		NA	0	0	NA	0	0	0	0		NA	0	NA	0	0
AC197837.3_FG003	4	4	4	0.533653	0		0.677197	0		0			0.0815123	0	0.294449	0	0.333124	0	0.376924	0	0.301026	0	0.661053	0		NA	0	0	NA	0	0	0	0		NA	0	NA	0	0
AC197901.3_FG003	NA	NA	NA	NA	0		NA	0		0			NA	0	NA	0	NA	0	NA	0	NA	0	NA	0		NA	0	0	NA	0	0	0	0		NA	0	NA	0	0
AC197903.4_FG001	NA	NA	NA	NA	0		NA	0		0			NA	0	NA	0	NA	0	NA	0	NA	0	NA	0		NA	0	0	NA	0	0	0	0		NA	0	NA	0	0
AC197909.3_FG002	NA	NA	NA	NA	0		NA	0		0			NA	0	NA	0	NA	0	NA	0	NA	0	NA	0		NA	0	0	NA	0	0	0	0		NA	0	NA	0	0
AC198019.2_FG004	NA	NA	NA	NA	0		NA	0		0			NA	0	NA	0	NA	0	NA	0	NA	0	NA	0		NA	0	0	NA	0	0	0	0		NA	0	NA	0	0
AC198025.3_FG001	4	4	4	0.651779	0		0.629016	0		0			0.214685	0	0.545112	0	0.436063	0	0.364285	0	0.385394	0	0.74369	0		NA	0	0	NA	0	0	0	0		NA	0	NA	0	0
AC198081.2_FG001	NA	NA	NA	NA	0		NA	0		0			NA	0	NA	0	NA	0	NA	0	NA	0	NA	0		NA	0	0	NA	0	0	0	0		NA	0	NA	0	0
AC198081.2_FG005	NA	NA	NA	NA	0		NA	0		0			NA	0	NA	0	NA	0	NA	0	NA	0	NA	0		NA	0	0	NA	0	0	0	0		NA	0	NA	0	0
AC198122.3_FG002	4	4	4	0.305421	0		0.632916	0		0			0.0940348	0	0.157941	0	0.388922	0	0.322329	0	0.269292	0	0.446199	0		NA	0	0	NA	0	0	0	0		NA	0	NA	0	0
AC198169.4_FG004	0	0	0	0.435859	0		0.384474	0		0			0.0380118	1	0.563497	0	0.421512	0	0.0811471	0	0.0761255	0	0.743893	0		0.730106	0	0	0.701371	0	0	0	0		0.264402	0	0.391818	0	0
AC198174.4_FG001	NA	NA	NA	NA	0		NA	0		0			NA	0	NA	0	NA	0	NA	0	NA	0	NA	0		NA	0	0	NA	0	0	0	0		NA	0	NA	0	0
AC198179.4_FG001	0	4		0.596157	0		0.102751	0		0			0.092651	0	0.346291	0	0.0162204	1	0.363003	0	0.173815	0	0.373466	0		NA	0	0	NA	0	0	0	0		NA	0	NA	0	0
AC198179.4_FG002	NA	NA	NA	NA	0		NA	0		0			NA	0	NA	0	NA	0	NA	0	NA	0	NA	0		NA	0	0	NA	0	0	0	0		NA	0	NA	0	0
AC198206.5_FG001	2	0		0.526819	0		0.111991	0		0			0.00473298	1	0.364264	0	0.00246839	1	0.0602818	0	0.374722	0	0.17992	0		0.167791	0	0	0.485547	0	0	0	0		0.089452	0	0.365671	0	0
AC198208.3_FG002	NA	NA	NA	NA	0		NA	0		0			NA	0	NA	0	NA	0	NA	0	NA	0	NA	0		NA	0	0	NA	0	0	0	0		NA	0	NA	0	0
AC198223.3_FG001	NA	NA	NA	NA	0		NA	0		0			NA	0	NA	0	NA	0	NA	0	NA	0	NA	0		NA	0	0	NA	0	0	0	0		NA	0	NA	0	0
AC198229.4_FG002	NA	NA	NA	NA	0		NA	0		0			NA	0	NA	0	NA	0	NA	0	NA	0	NA	0		NA	0	0	NA	0	0	0	0		NA	0	NA	0	0
AC198230.4_FG003	NA	NA	NA	NA	0		NA	0		0			NA	0	NA	0	NA	0	NA	0	NA	0	NA	0		NA	0	0	NA	0	0	0	0		NA	0	NA	0	0
AC198291.3_FG001	4	4	4	0.620132	0		0.543523	0		0			0.235777	0	0.577837	0	0.264394	0	0.35026	0	0.412861	0	0.614252	0		NA	0	0	NA	0	0	0	0		NA	0	NA	0	0
AC198324.3_FG003	NA	NA	NA	NA	0		NA	0		0			NA	0	NA	0	NA	0	NA	0	NA	0	NA	0		NA	0	0	NA	0	0	0	0		NA	0	NA	0	0
AC198352.4_FG005	2	0		0.450625	0		0.31652	0		0			0.0292818	1	0.118295	0	0.0306504	1	0.405299	0	0.42504	0	0.685681	0		NA	0	0	NA	0	0	0	0		NA	0	NA	0	0
AC198353.5_FG001	4	4	4	0.515122	0		0.583551	0		0			0.264791	0	0.411034	0	0.318744	0	0.322435	0	0.428031	0	0.765677	0		NA	0	0	NA	0	0	0	0		NA	0	NA	0	0
AC198353.5_FG004	4	4	4	0.147413	0		0.500096	0		0			0.11792	0	0.0573341	0	0.166753	0	0.164628	0	0.474185	0	0.55959	0		NA	0	0	NA	0	0	0	0		NA	0	NA	0	0
AC198357.3_FG002	4	4	4	0.597957	0		0.512854	0		0			0.145787	0	0.556135	0	0.383141	0	0.26315	0	0.227059	0	0.706127	0		NA	0	0	NA	0	0	0	0		NA	0	NA	0	0
AC198361.3_FG004	4	4	4	0.49512	0		0.573021	0		0			0.170271	0	0.322794	0	0.249688	0	0.369945	0	0.482166	0	0.764327	0		NA	0	0	NA	0	0	0	0		NA	0	NA	0	0
AC198366.3_FG004	4	4	4	0.632404	0		0.556802	0		0			0.156446	0	0.527187	0	0.416226	0	0.307141	0	0.271825	0	0.707547	0		NA	0	0	NA	0	0	0	0		NA	0	NA	0	0
AC198371.3_FG003	NA	NA	NA	NA	0		NA	0		0			NA	0	NA	0	NA	0	NA	0	NA	0	NA	0		NA	0	0	NA	0	0	0	0		NA	0	NA	0	0
AC198371.3_FG011	NA	NA	NA	NA	0		NA	0		0			NA	0	NA	0	NA	0	NA	0	NA	0	NA	0		NA	0	0	NA	0	0	0	0		NA	0	NA	0	0
AC198379.3_FG006	NA	NA	NA	NA	0		NA	0		0			NA	0	NA	0	NA	0	NA	0	NA	0	NA	0		NA	0	0	NA	0	0	0	0		NA	0	NA	0	0
AC198380.3_FG001	1	1	1	0.0253386	1	1	0.07935	0		0			3.24475e-08	1	6.99026e-05	1	0.000138866	1	0.00561027	1	0.00118225	1	0.652624	0		NA	0	0	NA	0	0	0	0		NA	0	NA	0	0
AC198382.3_FG001	2	0		0.495036	0		0.511082	0		0			0.0117302	1	0.0643992	0	0.034494	1	0.337007	0	0.43132	0	0.769942	0		NA	0	0	NA	0	0	0	0		NA	0	NA	0	0
AC198386.3_FG001	4	4	4	0.648997	0		0.554925	0		0			0.254483	0	0.570962	0	0.355347	0	0.386718	0	0.348934	0	0.693115	0		NA	0	0	NA	0	0	0	0		NA	0	NA	0	0
AC198393.3_FG001	NA	NA	NA	NA	0		NA	0		0			NA	0	NA	0	NA	0	NA	0	NA	0	NA	0		NA	0	0	NA	0	0	0	0		NA	0	NA	0	0
AC198398.3_FG003	4	4	4	0.381054	0		0.580161	0		0			0.23417	0	0.282252	0	0.298695	0	0.253729	0	0.449979	0	0.690904	0		NA	0	0	NA	0	0	0	0		NA	0	NA	0	0
AC198403.3_FG001	3	5		3.73971e-05	1	5	0.355423	0		0			0.00137384	1	0.0305192	1	0.337189	0	1.47451e-07	1	0.0170313	1	0.0725547	0		0.118937	0	0	0.280715	0	0	0	0		0.404823	0	0.207946	0	0
AC198414.2_FG001	3	3	3	0.332593	0		0.0514317	0		0			0.00746205	1	0.451936	0	0.291586	0	0.0372305	1	0.00705692	1	0.507469	0		NA	0	0	NA	0	0	0	0		NA	0	NA	0	0
AC198418.3_FG005	1	3		0.474157	0		0.629348	0		0			2.23697e-06	1	0.00810069	1	0.0134137	1	0.0716193	0	0.0494811	1	0.711211	0		0.27391	0	0	0.254791	0	0	0	0		0.207388	0	0.210599	0	0
AC198421.3_FG003	1	1	1	0.217813	0		0.473591	0		0			0.000130241	1	0.0443137	1	0.00301485	1	0.00699913	1	0.0293679	1	0.575874	0		NA	0	0	NA	0	0	0	0		NA	0	NA	0	0
AC198479.3_FG007	NA	NA	NA	NA	0		NA	0		0			NA	0	NA	0	NA	0	NA	0	NA	0	NA	0		NA	0	0	NA	0	0	0	0		NA	0	NA	0	0
AC198481.3_FG004	3	2		0.519244	0		0.493792	0		0			5.07656e-07	1	0.0873097	0	0.00251321	1	0.00345262	1	0.0902802	0	0.480632	0		0.245175	0	0	0.39331	0	0	0	0		0.155373	0	0.31588	0	0
AC198490.3_FG003	2	2	2	0.618829	0		0.639687	0		0			4.32296e-05	1	0.136831	0	0.0922535	0	0.0132818	1	0.0151502	1	0.77223	0		0.497135	0	0	0.731986	0	0	0	0		0.303129	0	0.057231	0	0
AC198494.3_FG002	4	4	4	0.226845	0		0.665207	0		0			0.293963	0	0.214607	0	0.416943	0	0.134776	0	0.48497	0	0.498332	0		NA	0	0	NA	0	0	0	0		NA	0	NA	0	0
AC198506.3_FG001	4	4	4	0.664777	0		0.526346	0		0			0.0832276	0	0.397793	0	0.431231	0	0.292078	0	0.210376	0	0.655483	0		NA	0	0	NA	0	0	0	0		NA	0	NA	0	0
AC198509.3_FG004	4	4	4	0.567608	0		0.577156	0		0			0.0798945	0	0.287354	0	0.170835	0	0.380437	0	0.486894	0	0.765839	0		NA	0	0	NA	0	0	0	0		NA	0	NA	0	0
AC198509.3_FG005	3	3	3	0.266593	0		0.0450763	1	3	0			0.000640203	1	0.0285258	1	0.00312222	1	0.0861407	0	0.428927	0	0.479423	0		NA	0	0	NA	0	0	0	0		NA	0	NA	0	0
AC198510.5_FG002	NA	NA	NA	NA	0		NA	0		0			NA	0	NA	0	NA	0	NA	0	NA	0	NA	0		NA	0	0	NA	0	0	0	0		NA	0	NA	0	0
AC198515.3_FG011	4	4	4	0.543968	0		0.596894	0		0			0.171055	0	0.551112	0	0.433904	0	0.237955	0	0.318809	0	0.770306	0		NA	0	0	NA	0	0	0	0		NA	0	NA	0	0
AC198518.3_FG002	0	8		0.0650935	0		0.103285	0		0			0.204919	0	0.0328373	1	0.0321892	1	0.0479636	1	0.101009	0	0.734977	0		NA	0	0	NA	0	0	0	0		NA	0	NA	0	0
AC198518.3_FG003	2	0		0.649935	0		0.159266	0		0			0.0390596	1	0.333688	0	0.251726	0	0.246049	0	0.0191371	1	0.34227	0		NA	0	0	NA	0	0	0	0		NA	0	NA	0	0
AC198518.3_FG005	NA	NA	NA	NA	0		NA	0		0			NA	0	NA	0	NA	0	NA	0	NA	0	NA	0		NA	0	0	NA	0	0	0	0		NA	0	NA	0	0
AC198597.4_FG001	0	0	0	0.650776	0		0.694212	0		0			0.0145152	1	0.293465	0	0.215566	0	0.109254	0	0.127786	0	0.765839	0		NA	0	0	NA	0	0	0	0		NA	0	NA	0	0
AC198605.3_FG005	4	4	4	0.453596	0		0.512281	0		0			0.0648931	0	0.218189	0	0.154912	0	0.407728	0	0.479137	0	0.770277	0		NA	0	0	NA	0	0	0	0		NA	0	NA	0	0
AC198691.3_FG005	NA	NA	NA	NA	0		NA	0		0			NA	0	NA	0	NA	0	NA	0	NA	0	NA	0		NA	0	0	NA	0	0	0	0		NA	0	NA	0	0
AC198699.3_FG004	3	3	3	0.143964	0		0.0859174	0		0			1.22799e-05	1	0.00307136	1	0.000973933	1	0.0528112	0	0.120759	0	0.721234	0		NA	0	0	NA	0	0	0	0		NA	0	NA	0	0
AC198700.2_FG004	4	4	4	0.319427	0		0.41872	0		0			0.183727	0	0.203525	0	0.167516	0	0.247731	0	0.366113	0	0.752612	0		0.434597	0	0	0.607101	0	0	0	0		0.138144	0	0.307704	0	0
AC198721.3_FG002	NA	NA	NA	NA	0		NA	0		0			NA	0	NA	0	NA	0	NA	0	NA	0	NA	0		NA	0	0	NA	0	0	0	0		NA	0	NA	0	0
AC198723.4_FG002	NA	NA	NA	NA	0		NA	0		0			NA	0	NA	0	NA	0	NA	0	NA	0	NA	0		NA	0	0	NA	0	0	0	0		NA	0	NA	0	0
AC198723.4_FG003	NA	NA	NA	NA	0		NA	0		0			NA	0	NA	0	NA	0	NA	0	NA	0	NA	0		NA	0	0	NA	0	0	0	0		NA	0	NA	0	0
AC198725.4_FG004	4	4	4	0.272353	0		0.321608	0		0			0.057297	0	0.0803295	0	0.0568771	0	0.31684	0	0.41154	0	0.769158	0		0.616253	0	0	0.413862	0	0	0	0		0.203292	0	0.0517177	0	0
AC198725.4_FG007	3	2		0.660908	0		0.205348	0		0			1.26479e-05	1	0.0641917	0	0.00056621	1	0.0279528	1	0.346712	0	0.401005	0		0.477137	0	0	0.729292	0	0	0	0		0.00939486	1	0.138085	0	0
AC198725.4_FG009	0	0	0	0.273646	0		0.688574	0		0			0.0479971	1	0.06762	0	0.265934	0	0.318684	0	0.300445	0	0.462674	0		0.456752	0	0	0.626387	0	0	0	0		0.0265912	1	0.0769585	0	0
AC198743.3_FG008	NA	NA	NA	NA	0		NA	0		0			NA	0	NA	0	NA	0	NA	0	NA	0	NA	0		NA	0	0	NA	0	0	0	0		NA	0	NA	0	0
AC198744.3_FG004	NA	NA	NA	NA	0		NA	0		0			NA	0	NA	0	NA	0	NA	0	NA	0	NA	0		NA	0	0	NA	0	0	0	0		NA	0	NA	0	0
AC198752.4_FG004	1	3		0.00492028	1	3	0.0762691	0		0			3.29883e-06	1	0.000152241	1	0.00078806	1	0.0890382	0	0.00333807	1	0.369293	0		0.612864	0	0	0.537579	0	0	0	0		0.023681	1	0.0894752	0	0
AC198766.3_FG005	NA	NA	NA	NA	0		NA	0		0			NA	0	NA	0	NA	0	NA	0	NA	0	NA	0		NA	0	0	NA	0	0	0	0		NA	0	NA	0	0
AC198773.3_FG003	NA	NA	NA	NA	0		NA	0		0			NA	0	NA	0	NA	0	NA	0	NA	0	NA	0		NA	0	0	NA	0	0	0	0		NA	0	NA	0	0
AC198781.3_FG002	NA	NA	NA	NA	0		NA	0		0			NA	0	NA	0	NA	0	NA	0	NA	0	NA	0		NA	0	0	NA	0	0	0	0		NA	0	NA	0	0
AC198787.3_FG001	NA	NA	NA	NA	0		NA	0		0			NA	0	NA	0	NA	0	NA	0	NA	0	NA	0		NA	0	0	NA	0	0	0	0		NA	0	NA	0	0
AC198787.3_FG004	NA	NA	NA	NA	0		NA	0		0			NA	0	NA	0	NA	0	NA	0	NA	0	NA	0		NA	0	0	NA	0	0	0	0		NA	0	NA	0	0
AC198787.3_FG009	NA	NA	NA	NA	0		NA	0		0			NA	0	NA	0	NA	0	NA	0	NA	0	NA	0		NA	0	0	NA	0	0	0	0		NA	0	NA	0	0
AC198871.3_FG002	4	4	4	0.640172	0		0.692778	0		0			0.0868947	0	0.406581	0	0.307884	0	0.291229	0	0.340252	0	0.766456	0		NA	0	0	NA	0	0	0	0		NA	0	NA	0	0
AC198901.4_FG004	NA	NA	NA	NA	0		NA	0		0			NA	0	NA	0	NA	0	NA	0	NA	0	NA	0		NA	0	0	NA	0	0	0	0		NA	0	NA	0	0
AC198923.4_FG002	2	0		0.620461	0		0.271946	0		0			0.00146234	1	0.12433	0	0.00664025	1	0.133661	0	0.478702	0	0.516942	0		NA	0	0	NA	0	0	0	0		NA	0	NA	0	0
AC198937.4_FG003	7	7	7	6.563e-06	1	7	2.61189e-05	1	7	1	7		0.000635148	1	0.00863517	1	0.0123302	1	2.213e-09	1	1.34319e-08	1	0.716441	0		0.467286	0	0	0.643323	0	0	0	0		0.084037	0	0.213204	0	0
AC198937.4_FG005	4	4	4	0.611082	0		0.594687	0		0			0.260046	0	0.504423	0	0.329058	0	0.404219	0	0.445364	0	0.753675	0		NA	0	0	NA	0	0	0	0		NA	0	NA	0	0
AC198940.4_FG008	0	0	0	0.664777	0		0.667846	0		0			0.0280531	1	0.353713	0	0.211722	0	0.165659	0	0.250899	0	0.761039	0		NA	0	0	NA	0	0	0	0		NA	0	NA	0	0
AC198979.4_FG009	NA	NA	NA	NA	0		NA	0		0			NA	0	NA	0	NA	0	NA	0	NA	0	NA	0		NA	0	0	NA	0	0	0	0		NA	0	NA	0	0
AC198981.4_FG001	NA	NA	NA	NA	0		NA	0		0			NA	0	NA	0	NA	0	NA	0	NA	0	NA	0		NA	0	0	NA	0	0	0	0		NA	0	NA	0	0
AC198982.3_FG006	4	4	4	0.655162	0		0.607763	0		0			0.0592783	0	0.378968	0	0.369087	0	0.265008	0	0.22145	0	0.702682	0		NA	0	0	NA	0	0	0	0		NA	0	NA	0	0
AC198993.3_FG004	4	4	4	0.659446	0		0.538313	0		0			0.122899	0	0.458147	0	0.203701	0	0.317503	0	0.501309	0	0.67098	0		NA	0	0	NA	0	0	0	0		NA	0	NA	0	0
AC198995.3_FG003	NA	NA	NA	NA	0		NA	0		0			NA	0	NA	0	NA	0	NA	0	NA	0	NA	0		NA	0	0	NA	0	0	0	0		NA	0	NA	0	0
AC199001.3_FG005	4	4	4	0.655162	0		0.692269	0		0			0.0520865	0	0.393319	0	0.271903	0	0.237263	0	0.310271	0	0.77706	0		0.32109	0	0	0.728982	0	0	0	0		0.280692	0	0.0735051	0	0
AC199005.2_FG003	NA	NA	NA	NA	0		NA	0		0			NA	0	NA	0	NA	0	NA	0	NA	0	NA	0		NA	0	0	NA	0	0	0	0		NA	0	NA	0	0
AC199039.3_FG003	4	0		0.0754331	0		0.622634	0		0			0.057314	0	0.0299207	1	0.361236	0	0.162342	0	0.215061	0	0.218146	0		NA	0	0	NA	0	0	0	0		NA	0	NA	0	0
AC199043.2_FG002	3	0		0.395589	0		0.225599	0		0			0.0413728	1	0.131779	0	0.0313932	1	0.426897	0	0.377671	0	0.675125	0		NA	0	0	NA	0	0	0	0		NA	0	NA	0	0
AC199054.3_FG003	NA	NA	NA	NA	0		NA	0		0			NA	0	NA	0	NA	0	NA	0	NA	0	NA	0		NA	0	0	NA	0	0	0	0		NA	0	NA	0	0
AC199054.3_FG007	0	0	0	0.58625	0		0.488494	0		0			0.0459439	1	0.258655	0	0.0956139	0	0.326593	0	0.510437	0	0.699231	0		NA	0	0	NA	0	0	0	0		NA	0	NA	0	0
AC199058.2_FG001	2	3		0.474193	0		0.580391	0		0			5.92828e-05	1	0.17203	0	0.0110235	1	0.0143502	1	0.156203	0	0.513339	0		0.425613	0	0	0.362111	0	0	0	0		0.00187698	1	0.000796954	1	1
AC199067.2_FG004	0	0	0	0.629347	0		0.484089	0		0			0.0217396	1	0.350257	0	0.0722107	0	0.167171	0	0.464709	0	0.578031	0		NA	0	0	NA	0	0	0	0		NA	0	NA	0	0
AC199068.2_FG017	1	1	1	0.607412	0		0.614039	0		0			2.39065e-09	1	0.00502852	1	0.00218022	1	0.00623074	1	0.011194	1	0.765839	0		0.73236	0	0	0.577949	0	0	0	0		0.00135969	1	0.0143259	1	1
AC199084.3_FG004	NA	NA	NA	NA	0		NA	0		0			NA	0	NA	0	NA	0	NA	0	NA	0	NA	0		NA	0	0	NA	0	0	0	0		NA	0	NA	0	0
AC199175.2_FG003	NA	NA	NA	NA	0		NA	0		0			NA	0	NA	0	NA	0	NA	0	NA	0	NA	0		NA	0	0	NA	0	0	0	0		NA	0	NA	0	0
AC199175.2_FG006	4	4	4	0.632759	0		0.656385	0		0			0.236128	0	0.576577	0	0.369666	0	0.359992	0	0.513819	0	0.721454	0		NA	0	0	NA	0	0	0	0		NA	0	NA	0	0
AC199182.3_FG003	NA	NA	NA	NA	0		NA	0		0			NA	0	NA	0	NA	0	NA	0	NA	0	NA	0		NA	0	0	NA	0	0	0	0		NA	0	NA	0	0
AC199183.3_FG001	4	4	4	0.639102	0		0.648873	0		0			0.155979	0	0.522746	0	0.417429	0	0.309765	0	0.357888	0	0.765839	0		NA	0	0	NA	0	0	0	0		NA	0	NA	0	0
AC199194.3_FG002	NA	NA	NA	NA	0		NA	0		0			NA	0	NA	0	NA	0	NA	0	NA	0	NA	0		NA	0	0	NA	0	0	0	0		NA	0	NA	0	0
AC199198.3_FG002	NA	NA	NA	NA	0		NA	0		0			NA	0	NA	0	NA	0	NA	0	NA	0	NA	0		NA	0	0	NA	0	0	0	0		NA	0	NA	0	0
AC199198.3_FG003	NA	NA	NA	NA	0		NA	0		0			NA	0	NA	0	NA	0	NA	0	NA	0	NA	0		NA	0	0	NA	0	0	0	0		NA	0	NA	0	0
AC199204.3_FG002	NA	NA	NA	NA	0		NA	0		0			NA	0	NA	0	NA	0	NA	0	NA	0	NA	0		NA	0	0	NA	0	0	0	0		NA	0	NA	0	0
AC199217.3_FG004	NA	NA	NA	NA	0		NA	0		0			NA	0	NA	0	NA	0	NA	0	NA	0	NA	0		NA	0	0	NA	0	0	0	0		NA	0	NA	0	0
AC199315.4_FG001	2	2	2	0.544981	0		0.431331	0		0			2.43187e-05	1	0.152834	0	0.177844	0	0.0124282	1	0.00536027	1	0.698949	0		NA	0	0	NA	0	0	0	0		NA	0	NA	0	0
AC199315.4_FG002	NA	NA	NA	NA	0		NA	0		0			NA	0	NA	0	NA	0	NA	0	NA	0	NA	0		NA	0	0	NA	0	0	0	0		NA	0	NA	0	0
AC199325.3_FG001	4	4	4	0.658704	0		0.657409	0		0			0.287635	0	0.579653	0	0.419909	0	0.415938	0	0.467594	0	0.761827	0		NA	0	0	NA	0	0	0	0		NA	0	NA	0	0
AC199325.3_FG005	NA	NA	NA	NA	0		NA	0		0			NA	0	NA	0	NA	0	NA	0	NA	0	NA	0		NA	0	0	NA	0	0	0	0		NA	0	NA	0	0
AC199335.3_FG002	4	4	4	0.327516	0		0.643258	0		0			0.28328	0	0.282693	0	0.388828	0	0.158629	0	0.474001	0	0.454158	0		NA	0	0	NA	0	0	0	0		NA	0	NA	0	0
AC199343.3_FG013	0	3		0.471787	0		0.638979	0		0			0.00332929	1	0.367418	0	0.160638	0	0.0436304	1	0.125065	0	0.700417	0		0.605675	0	0	0.39632	0	0	0	0		0.0879153	0	0.323772	0	0
AC199355.3_FG004	NA	NA	NA	NA	0		NA	0		0			NA	0	NA	0	NA	0	NA	0	NA	0	NA	0		NA	0	0	NA	0	0	0	0		NA	0	NA	0	0
AC199363.4_FG003	0	2		0.278443	0		0.615034	0		0			0.0107876	1	0.555319	0	0.118315	0	0.0174962	1	0.296875	0	0.389613	0		0.52533	0	0	0.663227	0	0	0	0		0.224829	0	0.404965	0	0
AC199370.4_FG006	NA	NA	NA	NA	0		NA	0		0			NA	0	NA	0	NA	0	NA	0	NA	0	NA	0		NA	0	0	NA	0	0	0	0		NA	0	NA	0	0
AC199379.4_FG001	NA	NA	NA	NA	0		NA	0		0			NA	0	NA	0	NA	0	NA	0	NA	0	NA	0		NA	0	0	NA	0	0	0	0		NA	0	NA	0	0
AC199379.4_FG008	4	4	4	0.228363	0		0.450359	0		0			0.056452	0	0.46399	0	0.427979	0	0.0574533	0	0.15525	0	0.663049	0		NA	0	0	NA	0	0	0	0		NA	0	NA	0	0
AC199382.3_FG005	NA	NA	NA	NA	0		NA	0		0			NA	0	NA	0	NA	0	NA	0	NA	0	NA	0		NA	0	0	NA	0	0	0	0		NA	0	NA	0	0
AC199384.3_FG002	4	4	4	0.630663	0		0.65775	0		0			0.0672635	0	0.363435	0	0.247827	0	0.290005	0	0.370348	0	0.776645	0		NA	0	0	NA	0	0	0	0		NA	0	NA	0	0
AC199421.3_FG001	NA	NA	NA	NA	0		NA	0		0			NA	0	NA	0	NA	0	NA	0	NA	0	NA	0		NA	0	0	NA	0	0	0	0		NA	0	NA	0	0
AC199439.4_FG005	4	4	4	0.592708	0		0.575415	0		0			0.104305	0	0.362247	0	0.441111	0	0.366709	0	0.240118	0	0.615293	0		NA	0	0	NA	0	0	0	0		NA	0	NA	0	0
AC199479.4_FG004	NA	NA	NA	NA	0		NA	0		0			NA	0	NA	0	NA	0	NA	0	NA	0	NA	0		NA	0	0	NA	0	0	0	0		NA	0	NA	0	0
AC199481.3_FG001	NA	NA	NA	NA	0		NA	0		0			NA	0	NA	0	NA	0	NA	0	NA	0	NA	0		NA	0	0	NA	0	0	0	0		NA	0	NA	0	0
AC199487.4_FG002	NA	NA	NA	NA	0		NA	0		0			NA	0	NA	0	NA	0	NA	0	NA	0	NA	0		NA	0	0	NA	0	0	0	0		NA	0	NA	0	0
AC199487.4_FG003	4	4	4	0.376078	0		0.674681	0		0			0.0736706	0	0.163449	0	0.325402	0	0.382793	0	0.297744	0	0.539396	0		NA	0	0	NA	0	0	0	0		NA	0	NA	0	0
AC199488.4_FG003	NA	NA	NA	NA	0		NA	0		0			NA	0	NA	0	NA	0	NA	0	NA	0	NA	0		NA	0	0	NA	0	0	0	0		NA	0	NA	0	0
AC199488.4_FG004	NA	NA	NA	NA	0		NA	0		0			NA	0	NA	0	NA	0	NA	0	NA	0	NA	0		NA	0	0	NA	0	0	0	0		NA	0	NA	0	0
AC199492.3_FG001	4	4	4	0.564629	0		0.487715	0		0			0.106077	0	0.552341	0	0.398624	0	0.204782	0	0.176199	0	0.715015	0		NA	0	0	NA	0	0	0	0		NA	0	NA	0	0
AC199517.4_FG001	NA	NA	NA	NA	0		NA	0		0			NA	0	NA	0	NA	0	NA	0	NA	0	NA	0		NA	0	0	NA	0	0	0	0		NA	0	NA	0	0
AC199517.4_FG006	NA	NA	NA	NA	0		NA	0		0			NA	0	NA	0	NA	0	NA	0	NA	0	NA	0		NA	0	0	NA	0	0	0	0		NA	0	NA	0	0
AC199524.3_FG002	NA	NA	NA	NA	0		NA	0		0			NA	0	NA	0	NA	0	NA	0	NA	0	NA	0		NA	0	0	NA	0	0	0	0		NA	0	NA	0	0
AC199526.5_FG001	1	1	1	0.259473	0		0.0647183	0		0			1.9017e-08	1	5.16293e-05	1	0.000758991	1	0.000655922	1	0.000110699	1	0.539001	0		NA	0	0	NA	0	0	0	0		NA	0	NA	0	0
AC199526.5_FG002	0	0	0	0.536757	0		0.683063	0		0			0.0100029	1	0.404305	0	0.192079	0	0.0796795	0	0.195003	0	0.70691	0		0.281733	0	0	0.126401	0	0	0	0		0.339397	0	0.273084	0	0
AC199526.5_FG003	4	0		0.111189	0		0.374967	0		0			0.110983	0	0.212042	0	0.327286	0	0.0187593	1	0.122592	0	0.602162	0		0.175397	0	0	0.0518561	0	0	0	0		0.0489346	1	0.00720864	1	1
AC199541.4_FG001	2	1		0.344372	0		0.109715	0		0			8.19679e-14	1	0.0222534	1	0.0749904	0	2.56002e-06	1	4.05479e-08	1	0.604708	0		NA	0	0	NA	0	0	0	0		NA	0	NA	0	0
AC199541.4_FG002	NA	NA	NA	NA	0		NA	0		0			NA	0	NA	0	NA	0	NA	0	NA	0	NA	0		NA	0	0	NA	0	0	0	0		NA	0	NA	0	0
AC199541.4_FG004	3	3	3	0.0774399	0		0.0708592	0		0			3.74671e-05	1	0.227246	0	0.159376	0	0.00119682	1	0.00147838	1	0.771105	0		NA	0	0	NA	0	0	0	0		NA	0	NA	0	0
AC199541.4_FG007	0	0	0	0.401887	0		0.603408	0		0			0.0352773	1	0.577008	0	0.329016	0	0.0689868	0	0.192431	0	0.685724	0		NA	0	0	NA	0	0	0	0		NA	0	NA	0	0
AC199543.4_FG004	4	4	4	0.290977	0		0.68536	0		0			0.197778	0	0.293547	0	0.376094	0	0.0978697	0	0.465075	0	0.456505	0		NA	0	0	NA	0	0	0	0		NA	0	NA	0	0
AC199554.2_FG003	NA	NA	NA	NA	0		NA	0		0			NA	0	NA	0	NA	0	NA	0	NA	0	NA	0		NA	0	0	NA	0	0	0	0		NA	0	NA	0	0
AC199571.3_FG001	0	0	0	0.363788	0		0.669351	0		0			0.0267268	1	0.129965	0	0.213364	0	0.366935	0	0.215477	0	0.586587	0		NA	0	0	NA	0	0	0	0		NA	0	NA	0	0
AC199571.3_FG003	1	1	1	0.252831	0		0.2705	0		0			2.34427e-07	1	0.00203808	1	0.00116452	1	0.00321206	1	0.00429169	1	0.778737	0		NA	0	0	NA	0	0	0	0		NA	0	NA	0	0
AC199571.3_FG004	3	3	3	0.175403	0		0.170513	0		0			0.000166269	1	0.00372651	1	0.00187409	1	0.322776	0	0.413264	0	0.771896	0		NA	0	0	NA	0	0	0	0		NA	0	NA	0	0
AC199572.3_FG005	NA	NA	NA	NA	0		NA	0		0			NA	0	NA	0	NA	0	NA	0	NA	0	NA	0		NA	0	0	NA	0	0	0	0		NA	0	NA	0	0
AC199577.4_FG004	0	0	0	0.615163	0		0.5929	0		0			0.0269321	1	0.29178	0	0.240892	0	0.183822	0	0.194985	0	0.746246	0		NA	0	0	NA	0	0	0	0		NA	0	NA	0	0
AC199624.4_FG007	0	3		0.141489	0		0.436562	0		0			0.00994346	1	0.0341517	1	0.0706823	0	0.407567	0	0.296819	0	0.568016	0		NA	0	0	NA	0	0	0	0		NA	0	NA	0	0
AC199632.4_FG007	NA	NA	NA	NA	0		NA	0		0			NA	0	NA	0	NA	0	NA	0	NA	0	NA	0		NA	0	0	NA	0	0	0	0		NA	0	NA	0	0
AC199638.4_FG001	NA	NA	NA	NA	0		NA	0		0			NA	0	NA	0	NA	0	NA	0	NA	0	NA	0		NA	0	0	NA	0	0	0	0		NA	0	NA	0	0
AC199701.4_FG001	NA	NA	NA	NA	0		NA	0		0			NA	0	NA	0	NA	0	NA	0	NA	0	NA	0		NA	0	0	NA	0	0	0	0		NA	0	NA	0	0
AC199703.3_FG003	3	0		0.273646	0		0.276945	0		0			0.00256798	1	0.0512128	0	0.0293256	1	0.0885232	0	0.133001	0	0.766549	0		NA	0	0	NA	0	0	0	0		NA	0	NA	0	0
AC199705.3_FG006	NA	NA	NA	NA	0		NA	0		0			NA	0	NA	0	NA	0	NA	0	NA	0	NA	0		NA	0	0	NA	0	0	0	0		NA	0	NA	0	0
AC199705.3_FG008	2	2	2	0.441855	0		0.694577	0		0			2.0714e-05	1	0.256968	0	0.0503409	0	0.0025099	1	0.024408	1	0.607088	0		NA	0	0	NA	0	0	0	0		NA	0	NA	0	0
AC199728.4_FG006	NA	NA	NA	NA	0		NA	0		0			NA	0	NA	0	NA	0	NA	0	NA	0	NA	0		NA	0	0	NA	0	0	0	0		NA	0	NA	0	0
AC199765.4_FG008	0	0	0	0.61378	0		0.405829	0		0			0.0303827	1	0.400521	0	0.061393	0	0.167739	0	0.502841	0	0.5052	0		NA	0	0	NA	0	0	0	0		NA	0	NA	0	0
AC199768.4_FG008	NA	NA	NA	NA	0		NA	0		0			NA	0	NA	0	NA	0	NA	0	NA	0	NA	0		NA	0	0	NA	0	0	0	0		NA	0	NA	0	0
AC199771.4_FG001	NA	NA	NA	NA	0		NA	0		0			NA	0	NA	0	NA	0	NA	0	NA	0	NA	0		NA	0	0	NA	0	0	0	0		NA	0	NA	0	0
AC199777.3_FG001	NA	NA	NA	NA	0		NA	0		0			NA	0	NA	0	NA	0	NA	0	NA	0	NA	0		NA	0	0	NA	0	0	0	0		NA	0	NA	0	0
AC199779.3_FG006	0	3		0.309457	0		0.675057	0		0			0.000823369	1	0.0202859	1	0.0913553	0	0.286162	0	0.109053	0	0.544765	0		0.625418	0	0	0.738806	0	0	0	0		0.0116315	1	0.0453783	1	1
AC199782.5_FG001	0	2		0.553192	0		0.692778	0		0			0.000776086	1	0.25909	0	0.100392	0	0.0383744	1	0.111605	0	0.707547	0		0.460989	0	0	0.537579	0	0	0	0		0.00264519	1	0.0088541	1	1
AC199782.5_FG002	0	2		0.167704	0		0.562297	0		0			0.0184052	1	0.434868	0	0.331444	0	0.0102133	1	0.126691	0	0.535269	0		0.523123	0	0	0.760295	0	0	0	0		0.138144	0	0.404965	0	0
AC199782.5_FG003	1	3		0.594414	0		0.615681	0		0			8.07501e-06	1	0.0688714	0	0.0447751	1	0.0185636	1	0.0231269	1	0.773293	0		0.330216	0	0	0.0313923	1	0	0	0		0.273186	0	0.191411	0	0
AC199790.4_FG013	NA	NA	NA	NA	0		NA	0		0			NA	0	NA	0	NA	0	NA	0	NA	0	NA	0		NA	0	0	NA	0	0	0	0		NA	0	NA	0	0
AC199801.4_FG005	NA	NA	NA	NA	0		NA	0		0			NA	0	NA	0	NA	0	NA	0	NA	0	NA	0		NA	0	0	NA	0	0	0	0		NA	0	NA	0	0
AC199810.3_FG003	NA	NA	NA	NA	0		NA	0		0			NA	0	NA	0	NA	0	NA	0	NA	0	NA	0		NA	0	0	NA	0	0	0	0		NA	0	NA	0	0
AC199820.4_FG006	0	4		0.135308	0		0.0882594	0		0			0.249568	0	0.090961	0	0.0361521	1	0.0799797	0	0.0746857	0	0.743261	0		0.302551	0	0	0.716706	0	0	0	0		0.0662614	0	0.404965	0	0
AC199826.4_FG003	3	3	3	0.017575	1	3	0.0136771	1	3	1	3		3.92424e-11	1	6.28708e-07	1	2.60733e-07	1	0.083727	0	0.122033	0	0.77223	0		0.572847	0	0	0.40917	0	0	0	0		0.119741	0	0.245006	0	0
AC199843.4_FG007	4	4	4	0.107465	0		0.404083	0		0			0.138319	0	0.0669963	0	0.144658	0	0.13234	0	0.401674	0	0.583165	0		NA	0	0	NA	0	0	0	0		NA	0	NA	0	0
AC199857.4_FG004	NA	NA	NA	NA	0		NA	0		0			NA	0	NA	0	NA	0	NA	0	NA	0	NA	0		NA	0	0	NA	0	0	0	0		NA	0	NA	0	0
AC199873.4_FG002	4	4	4	0.573466	0		0.570901	0		0			0.115745	0	0.338004	0	0.199564	0	0.402143	0	0.513023	0	0.762392	0		NA	0	0	NA	0	0	0	0		NA	0	NA	0	0
AC199875.3_FG002	NA	NA	NA	NA	0		NA	0		0			NA	0	NA	0	NA	0	NA	0	NA	0	NA	0		NA	0	0	NA	0	0	0	0		NA	0	NA	0	0
AC199893.4_FG002	0	0	0	0.490911	0		0.533186	0		0			0.0246065	1	0.147116	0	0.0962668	0	0.358382	0	0.43618	0	0.779622	0		0.742508	0	0	0.615211	0	0	0	0		0.21733	0	0.379614	0	0
AC199908.4_FG002	4	4	4	0.666092	0		0.608468	0		0			0.193972	0	0.513089	0	0.291157	0	0.369644	0	0.492909	0	0.714917	0		NA	0	0	NA	0	0	0	0		NA	0	NA	0	0
AC199911.5_FG001	4	4	4	0.532973	0		0.466879	0		0			0.12227	0	0.327856	0	0.164124	0	0.421945	0	0.457577	0	0.727227	0		NA	0	0	NA	0	0	0	0		NA	0	NA	0	0
AC199918.4_FG003	NA	NA	NA	NA	0		NA	0		0			NA	0	NA	0	NA	0	NA	0	NA	0	NA	0		NA	0	0	NA	0	0	0	0		NA	0	NA	0	0
AC199932.4_FG002	NA	NA	NA	NA	0		NA	0		0			NA	0	NA	0	NA	0	NA	0	NA	0	NA	0		NA	0	0	NA	0	0	0	0		NA	0	NA	0	0
AC199956.4_FG003	NA	NA	NA	NA	0		NA	0		0			NA	0	NA	0	NA	0	NA	0	NA	0	NA	0		NA	0	0	NA	0	0	0	0		NA	0	NA	0	0
AC199961.4_FG001	4	4	4	0.378269	0		0.365527	0		0			0.135624	0	0.223984	0	0.130092	0	0.329587	0	0.377453	0	0.765718	0		NA	0	0	NA	0	0	0	0		NA	0	NA	0	0
AC199961.4_FG004	4	4	4	0.644511	0		0.675105	0		0			0.252608	0	0.531175	0	0.399872	0	0.422286	0	0.51049	0	0.778313	0		NA	0	0	NA	0	0	0	0		NA	0	NA	0	0
AC200038.4_FG011	NA	NA	NA	NA	0		NA	0		0			NA	0	NA	0	NA	0	NA	0	NA	0	NA	0		NA	0	0	NA	0	0	0	0		NA	0	NA	0	0
AC200045.3_FG006	NA	NA	NA	NA	0		NA	0		0			NA	0	NA	0	NA	0	NA	0	NA	0	NA	0		NA	0	0	NA	0	0	0	0		NA	0	NA	0	0
AC200047.3_FG004	NA	NA	NA	NA	0		NA	0		0			NA	0	NA	0	NA	0	NA	0	NA	0	NA	0		NA	0	0	NA	0	0	0	0		NA	0	NA	0	0
AC200057.4_FG006	NA	NA	NA	NA	0		NA	0		0			NA	0	NA	0	NA	0	NA	0	NA	0	NA	0		NA	0	0	NA	0	0	0	0		NA	0	NA	0	0
AC200057.4_FG007	4	4	4	0.60265	0		0.601893	0		0			0.283944	0	0.511755	0	0.349792	0	0.381992	0	0.433071	0	0.76317	0		NA	0	0	NA	0	0	0	0		NA	0	NA	0	0
AC200065.5_FG009	0	4		0.545333	0		0.0538213	0		0			0.14021	0	0.356983	0	0.0272295	1	0.425263	0	0.113984	0	0.368467	0		NA	0	0	NA	0	0	0	0		NA	0	NA	0	0
AC200069.4_FG002	NA	NA	NA	NA	0		NA	0		0			NA	0	NA	0	NA	0	NA	0	NA	0	NA	0		NA	0	0	NA	0	0	0	0		NA	0	NA	0	0
AC200099.4_FG003	NA	NA	NA	NA	0		NA	0		0			NA	0	NA	0	NA	0	NA	0	NA	0	NA	0		NA	0	0	NA	0	0	0	0		NA	0	NA	0	0
AC200099.4_FG006	0	4		0.564186	0		0.207558	0		0			0.0551115	0	0.281366	0	0.241848	0	0.333457	0	0.0301342	1	0.286017	0		0.690068	0	0	0.577965	0	0	0	0		0.333122	0	0.101406	0	0
AC200106.4_FG003	NA	NA	NA	NA	0		NA	0		0			NA	0	NA	0	NA	0	NA	0	NA	0	NA	0		NA	0	0	NA	0	0	0	0		NA	0	NA	0	0
AC200112.4_FG007	NA	NA	NA	NA	0		NA	0		0			NA	0	NA	0	NA	0	NA	0	NA	0	NA	0		NA	0	0	NA	0	0	0	0		NA	0	NA	0	0
AC200112.4_FG008	4	4	4	0.346695	0		0.232167	0		0			0.167692	0	0.416771	0	0.2064	0	0.144395	0	0.12706	0	0.708495	0		NA	0	0	NA	0	0	0	0		NA	0	NA	0	0
AC200117.3_FG004	NA	NA	NA	NA	0		NA	0		0			NA	0	NA	0	NA	0	NA	0	NA	0	NA	0		NA	0	0	NA	0	0	0	0		NA	0	NA	0	0
AC200122.4_FG004	0	0	0	0.537665	0		0.635281	0		0			0.0183672	1	0.457827	0	0.167779	0	0.0533132	0	0.192291	0	0.609894	0		NA	0	0	NA	0	0	0	0		NA	0	NA	0	0
AC200124.3_FG005	4	4	4	0.134349	0		0.595477	0		0			0.0822006	0	0.0652109	0	0.216241	0	0.194574	0	0.439499	0	0.463157	0		NA	0	0	NA	0	0	0	0		NA	0	NA	0	0
AC200138.3_FG003	3	3	3	0.244656	0		0.310892	0		0			0.00340477	1	0.036099	1	0.027279	1	0.309172	0	0.346458	0	0.762442	0		NA	0	0	NA	0	0	0	0		NA	0	NA	0	0
AC200143.3_FG003	NA	NA	NA	NA	0		NA	0		0			NA	0	NA	0	NA	0	NA	0	NA	0	NA	0		NA	0	0	NA	0	0	0	0		NA	0	NA	0	0
AC200171.2_FG001	NA	NA	NA	NA	0		NA	0		0			NA	0	NA	0	NA	0	NA	0	NA	0	NA	0		NA	0	0	NA	0	0	0	0		NA	0	NA	0	0
AC200178.2_FG002	0	4		0.425375	0		0.0960271	0		0			0.0557598	0	0.18187	0	0.0209013	1	0.420967	0	0.242911	0	0.528919	0		NA	0	0	NA	0	0	0	0		NA	0	NA	0	0
AC200178.2_FG003	2	0		0.606087	0		0.567424	0		0			0.00325751	1	0.142471	0	0.024673	1	0.103756	0	0.318427	0	0.611198	0		NA	0	0	NA	0	0	0	0		NA	0	NA	0	0
AC200207.2_FG001	NA	NA	NA	NA	0		NA	0		0			NA	0	NA	0	NA	0	NA	0	NA	0	NA	0		NA	0	0	NA	0	0	0	0		NA	0	NA	0	0
AC200209.1_FG001	NA	NA	NA	NA	0		NA	0		0			NA	0	NA	0	NA	0	NA	0	NA	0	NA	0		NA	0	0	NA	0	0	0	0		NA	0	NA	0	0
AC200210.1_FG006	4	4	4	0.488814	0		0.433235	0		0			0.262169	0	0.447426	0	0.260483	0	0.257998	0	0.257225	0	0.736499	0		0.748606	0	0	0.606725	0	0	0	0		0.372488	0	0.262962	0	0
AC200215.3_FG002	3	0		0.650543	0		0.177769	0		0			0.038431	1	0.353161	0	0.0347762	1	0.206725	0	0.372346	0	0.412657	0		NA	0	0	NA	0	0	0	0		NA	0	NA	0	0
AC200225.5_FG001	NA	NA	NA	NA	0		NA	0		0			NA	0	NA	0	NA	0	NA	0	NA	0	NA	0		NA	0	0	NA	0	0	0	0		NA	0	NA	0	0
AC200228.4_FG001	NA	NA	NA	NA	0		NA	0		0			NA	0	NA	0	NA	0	NA	0	NA	0	NA	0		NA	0	0	NA	0	0	0	0		NA	0	NA	0	0
AC200234.3_FG001	NA	NA	NA	NA	0		NA	0		0			NA	0	NA	0	NA	0	NA	0	NA	0	NA	0		NA	0	0	NA	0	0	0	0		NA	0	NA	0	0
AC200234.3_FG006	0	0	0	0.570015	0		0.51029	0		0			0.0440347	1	0.489986	0	0.138855	0	0.121958	0	0.426328	0	0.541069	0		NA	0	0	NA	0	0	0	0		NA	0	NA	0	0
AC200240.3_FG002	4	4	4	0.457173	0		0.50313	0		0			0.183007	0	0.307896	0	0.214943	0	0.341207	0	0.428605	0	0.775212	0		NA	0	0	NA	0	0	0	0		NA	0	NA	0	0
AC200256.3_FG003	NA	NA	NA	NA	0		NA	0		0			NA	0	NA	0	NA	0	NA	0	NA	0	NA	0		NA	0	0	NA	0	0	0	0		NA	0	NA	0	0
AC200287.4_FG006	3	0		0.458041	0		0.214853	0		0			0.00116667	1	0.0525094	0	0.00526543	1	0.211524	0	0.47624	0	0.622146	0		NA	0	0	NA	0	0	0	0		NA	0	NA	0	0
AC200298.4_FG001	0	0	0	0.578214	0		0.68622	0		0			0.0139727	1	0.406758	0	0.219387	0	0.0820002	0	0.16369	0	0.726405	0		NA	0	0	NA	0	0	0	0		NA	0	NA	0	0
AC200490.3_FG005	NA	NA	NA	NA	0		NA	0		0			NA	0	NA	0	NA	0	NA	0	NA	0	NA	0		NA	0	0	NA	0	0	0	0		NA	0	NA	0	0
AC200495.3_FG001	3	3	3	0.2682	0		0.216694	0		0			5.81321e-05	1	0.144369	0	0.126208	0	0.0057214	1	0.00507169	1	0.743587	0		NA	0	0	NA	0	0	0	0		NA	0	NA	0	0
AC200497.4_FG015	NA	NA	NA	NA	0		NA	0		0			NA	0	NA	0	NA	0	NA	0	NA	0	NA	0		NA	0	0	NA	0	0	0	0		NA	0	NA	0	0
AC200535.4_FG002	NA	NA	NA	NA	0		NA	0		0			NA	0	NA	0	NA	0	NA	0	NA	0	NA	0		NA	0	0	NA	0	0	0	0		NA	0	NA	0	0
AC200540.3_FG002	NA	NA	NA	NA	0		NA	0		0			NA	0	NA	0	NA	0	NA	0	NA	0	NA	0		NA	0	0	NA	0	0	0	0		NA	0	NA	0	0
AC200565.4_FG001	0	0	0	0.5551	0		0.374455	0		0			0.0481711	1	0.50777	0	0.361414	0	0.133019	0	0.0728518	0	0.634888	0		NA	0	0	NA	0	0	0	0		NA	0	NA	0	0
AC200622.3_FG005	NA	NA	NA	NA	0		NA	0		0			NA	0	NA	0	NA	0	NA	0	NA	0	NA	0		NA	0	0	NA	0	0	0	0		NA	0	NA	0	0
AC200627.3_FG005	NA	NA	NA	NA	0		NA	0		0			NA	0	NA	0	NA	0	NA	0	NA	0	NA	0		NA	0	0	NA	0	0	0	0		NA	0	NA	0	0
AC200670.3_FG002	NA	NA	NA	NA	0		NA	0		0			NA	0	NA	0	NA	0	NA	0	NA	0	NA	0		NA	0	0	NA	0	0	0	0		NA	0	NA	0	0
AC200725.4_FG003	NA	NA	NA	NA	0		NA	0		0			NA	0	NA	0	NA	0	NA	0	NA	0	NA	0		NA	0	0	NA	0	0	0	0		NA	0	NA	0	0
AC200725.4_FG008	NA	NA	NA	NA	0		NA	0		0			NA	0	NA	0	NA	0	NA	0	NA	0	NA	0		NA	0	0	NA	0	0	0	0		NA	0	NA	0	0
AC200739.5_FG001	NA	NA	NA	NA	0		NA	0		0			NA	0	NA	0	NA	0	NA	0	NA	0	NA	0		NA	0	0	NA	0	0	0	0		NA	0	NA	0	0
AC200753.3_FG003	3	3	3	0.450191	0		0.500677	0		0			0.000492415	1	0.0338057	1	0.0225039	1	0.207301	0	0.25849	0	0.774164	0		0.190709	0	0	0.0025878	1	0	0	0		0.000408974	1	1.82074e-08	1	1
AC200754.4_FG004	NA	NA	NA	NA	0		NA	0		0			NA	0	NA	0	NA	0	NA	0	NA	0	NA	0		NA	0	0	NA	0	0	0	0		NA	0	NA	0	0
AC200876.4_FG002	NA	NA	NA	NA	0		NA	0		0			NA	0	NA	0	NA	0	NA	0	NA	0	NA	0		NA	0	0	NA	0	0	0	0		NA	0	NA	0	0
AC200876.4_FG003	NA	NA	NA	NA	0		NA	0		0			NA	0	NA	0	NA	0	NA	0	NA	0	NA	0		NA	0	0	NA	0	0	0	0		NA	0	NA	0	0
AC200881.4_FG002	NA	NA	NA	NA	0		NA	0		0			NA	0	NA	0	NA	0	NA	0	NA	0	NA	0		NA	0	0	NA	0	0	0	0		NA	0	NA	0	0
AC200881.4_FG007	NA	NA	NA	NA	0		NA	0		0			NA	0	NA	0	NA	0	NA	0	NA	0	NA	0		NA	0	0	NA	0	0	0	0		NA	0	NA	0	0
AC200884.4_FG002	4	4	4	0.550641	0		0.397155	0		0			0.266136	0	0.502336	0	0.185246	0	0.311474	0	0.269826	0	0.433025	0		NA	0	0	NA	0	0	0	0		NA	0	NA	0	0
AC200887.4_FG002	NA	NA	NA	NA	0		NA	0		0			NA	0	NA	0	NA	0	NA	0	NA	0	NA	0		NA	0	0	NA	0	0	0	0		NA	0	NA	0	0
AC200904.3_FG003	NA	NA	NA	NA	0		NA	0		0			NA	0	NA	0	NA	0	NA	0	NA	0	NA	0		NA	0	0	NA	0	0	0	0		NA	0	NA	0	0
AC201740.3_FG003	NA	NA	NA	NA	0		NA	0		0			NA	0	NA	0	NA	0	NA	0	NA	0	NA	0		NA	0	0	NA	0	0	0	0		NA	0	NA	0	0
AC201767.3_FG003	NA	NA	NA	NA	0		NA	0		0			NA	0	NA	0	NA	0	NA	0	NA	0	NA	0		NA	0	0	NA	0	0	0	0		NA	0	NA	0	0
AC201769.3_FG002	4	4	4	0.642884	0		0.61706	0		0			0.058812	0	0.413659	0	0.19466	0	0.236431	0	0.420559	0	0.700838	0		0.700733	0	0	0.533429	0	0	0	0		0.0980594	0	0.249714	0	0
AC201791.3_FG005	NA	NA	NA	NA	0		NA	0		0			NA	0	NA	0	NA	0	NA	0	NA	0	NA	0		NA	0	0	NA	0	0	0	0		NA	0	NA	0	0
AC201797.4_FG006	NA	NA	NA	NA	0		NA	0		0			NA	0	NA	0	NA	0	NA	0	NA	0	NA	0		NA	0	0	NA	0	0	0	0		NA	0	NA	0	0
AC201798.4_FG005	NA	NA	NA	NA	0		NA	0		0			NA	0	NA	0	NA	0	NA	0	NA	0	NA	0		NA	0	0	NA	0	0	0	0		NA	0	NA	0	0
AC201815.4_FG001	4	4	4	0.316833	0		0.623202	0		0			0.103498	0	0.431411	0	0.398408	0	0.0747959	0	0.289162	0	0.604246	0		NA	0	0	NA	0	0	0	0		NA	0	NA	0	0
AC201828.3_FG002	NA	NA	NA	NA	0		NA	0		0			NA	0	NA	0	NA	0	NA	0	NA	0	NA	0		NA	0	0	NA	0	0	0	0		NA	0	NA	0	0
AC201832.3_FG006	NA	NA	NA	NA	0		NA	0		0			NA	0	NA	0	NA	0	NA	0	NA	0	NA	0		NA	0	0	NA	0	0	0	0		NA	0	NA	0	0
AC201888.3_FG013	NA	NA	NA	NA	0		NA	0		0			NA	0	NA	0	NA	0	NA	0	NA	0	NA	0		NA	0	0	NA	0	0	0	0		NA	0	NA	0	0
AC201891.3_FG001	3	3	3	0.104241	0		0.0936326	0		0			1.18041e-05	1	0.20812	0	0.146988	0	0.000879378	1	0.00100565	1	0.768838	0		NA	0	0	NA	0	0	0	0		NA	0	NA	0	0
AC201898.4_FG004	4	4	4	0.466289	0		0.492582	0		0			0.0557093	0	0.201264	0	0.127546	0	0.404448	0	0.495727	0	0.774689	0		0.304641	0	0	0.382547	0	0	0	0		0.19799	0	0.29588	0	0
AC201966.3_FG001	NA	NA	NA	NA	0		NA	0		0			NA	0	NA	0	NA	0	NA	0	NA	0	NA	0		NA	0	0	NA	0	0	0	0		NA	0	NA	0	0
AC201969.4_FG005	NA	NA	NA	NA	0		NA	0		0			NA	0	NA	0	NA	0	NA	0	NA	0	NA	0		NA	0	0	NA	0	0	0	0		NA	0	NA	0	0
AC201977.3_FG005	NA	NA	NA	NA	0		NA	0		0			NA	0	NA	0	NA	0	NA	0	NA	0	NA	0		NA	0	0	NA	0	0	0	0		NA	0	NA	0	0
AC201985.4_FG003	NA	NA	NA	NA	0		NA	0		0			NA	0	NA	0	NA	0	NA	0	NA	0	NA	0		NA	0	0	NA	0	0	0	0		NA	0	NA	0	0
AC201986.3_FG002	NA	NA	NA	NA	0		NA	0		0			NA	0	NA	0	NA	0	NA	0	NA	0	NA	0		NA	0	0	NA	0	0	0	0		NA	0	NA	0	0
AC201995.4_FG001	NA	NA	NA	NA	0		NA	0		0			NA	0	NA	0	NA	0	NA	0	NA	0	NA	0		NA	0	0	NA	0	0	0	0		NA	0	NA	0	0
AC202000.4_FG006	NA	NA	NA	NA	0		NA	0		0			NA	0	NA	0	NA	0	NA	0	NA	0	NA	0		NA	0	0	NA	0	0	0	0		NA	0	NA	0	0
AC202011.3_FG010	3	3	3	0.118271	0		0.0651676	0		0			0.0432872	1	0.31565	0	0.15489	0	0.0108784	1	0.00724712	1	0.729541	0		0.389653	0	0	0.35093	0	0	0	0		0.138144	0	0.100698	0	0
AC202015.3_FG004	NA	NA	NA	NA	0		NA	0		0			NA	0	NA	0	NA	0	NA	0	NA	0	NA	0		NA	0	0	NA	0	0	0	0		NA	0	NA	0	0
AC202040.4_FG002	NA	NA	NA	NA	0		NA	0		0			NA	0	NA	0	NA	0	NA	0	NA	0	NA	0		NA	0	0	NA	0	0	0	0		NA	0	NA	0	0
AC202041.4_FG003	4	4	4	0.403367	0		0.480461	0		0			0.144052	0	0.245496	0	0.184594	0	0.338324	0	0.448045	0	0.764704	0		NA	0	0	NA	0	0	0	0		NA	0	NA	0	0
AC202069.3_FG002	NA	NA	NA	NA	0		NA	0		0			NA	0	NA	0	NA	0	NA	0	NA	0	NA	0		NA	0	0	NA	0	0	0	0		NA	0	NA	0	0
AC202073.4_FG001	3	0		0.537455	0		0.405983	0		0			0.000339645	1	0.0534648	0	0.0108995	1	0.139562	0	0.309753	0	0.690124	0		0.253548	0	0	0.0624487	0	0	0	0		0.253607	0	0.0337523	1	0
AC202076.3_FG009	3	3	3	0.0245143	1	3	0.00366487	1	3	1	3		1.39407e-05	1	0.475742	0	0.416338	0	0.000138623	1	3.36381e-05	1	0.659206	0		0.715953	0	0	0.649604	0	0	0	0		0.000822631	1	0.000203922	1	1
AC202091.4_FG003	NA	NA	NA	NA	0		NA	0		0			NA	0	NA	0	NA	0	NA	0	NA	0	NA	0		NA	0	0	NA	0	0	0	0		NA	0	NA	0	0
AC202092.2_FG003	NA	NA	NA	NA	0		NA	0		0			NA	0	NA	0	NA	0	NA	0	NA	0	NA	0		NA	0	0	NA	0	0	0	0		NA	0	NA	0	0
AC202101.3_FG002	NA	NA	NA	NA	0		NA	0		0			NA	0	NA	0	NA	0	NA	0	NA	0	NA	0		NA	0	0	NA	0	0	0	0		NA	0	NA	0	0
AC202107.3_FG001	4	0		0.0921702	0		0.697302	0		0			0.100522	0	0.0305519	1	0.31923	0	0.12899	0	0.370645	0	0.294766	0		NA	0	0	NA	0	0	0	0		NA	0	NA	0	0
AC202110.3_FG004	1	3		2.80723e-05	1	3	0.00270996	1	1	1			1.00839e-10	1	0.0515349	0	0.000191523	1	2.52649e-08	1	9.6308e-07	1	0.332441	0		NA	0	0	NA	0	0	0	0		NA	0	NA	0	0
AC202122.2_FG001	NA	NA	NA	NA	0		NA	0		0			NA	0	NA	0	NA	0	NA	0	NA	0	NA	0		NA	0	0	NA	0	0	0	0		NA	0	NA	0	0
AC202129.3_FG001	NA	NA	NA	NA	0		NA	0		0			NA	0	NA	0	NA	0	NA	0	NA	0	NA	0		NA	0	0	NA	0	0	0	0		NA	0	NA	0	0
AC202139.3_FG008	NA	NA	NA	NA	0		NA	0		0			NA	0	NA	0	NA	0	NA	0	NA	0	NA	0		NA	0	0	NA	0	0	0	0		NA	0	NA	0	0
AC202144.5_FG001	1	3		0.0837218	0		0.19328	0		0			2.18788e-08	1	0.0839275	0	0.0194077	1	5.73382e-05	1	0.000288673	1	0.692008	0		0.73236	0	0	0.756575	0	0	0	0		0.000504486	1	0.00147805	1	1
AC202172.3_FG004	NA	NA	NA	NA	0		NA	0		0			NA	0	NA	0	NA	0	NA	0	NA	0	NA	0		NA	0	0	NA	0	0	0	0		NA	0	NA	0	0
AC202178.3_FG002	4	4	4	0.665638	0		0.693346	0		0			0.12105	0	0.46352	0	0.332202	0	0.311909	0	0.391452	0	0.777382	0		NA	0	0	NA	0	0	0	0		NA	0	NA	0	0
AC202179.3_FG004	NA	NA	NA	NA	0		NA	0		0			NA	0	NA	0	NA	0	NA	0	NA	0	NA	0		NA	0	0	NA	0	0	0	0		NA	0	NA	0	0
AC202179.3_FG005	NA	NA	NA	NA	0		NA	0		0			NA	0	NA	0	NA	0	NA	0	NA	0	NA	0		NA	0	0	NA	0	0	0	0		NA	0	NA	0	0
AC202181.3_FG010	0	0	0	0.601749	0		0.500365	0		0			0.0202262	1	0.239382	0	0.0845973	0	0.241917	0	0.426602	0	0.698936	0		NA	0	0	NA	0	0	0	0		NA	0	NA	0	0
AC202185.4_FG004	0	0	0	0.513894	0		0.457929	0		0			0.00570823	1	0.393285	0	0.344822	0	0.0582659	0	0.0501207	0	0.733818	0		0.510427	0	0	0.463671	0	0	0	0		0.232398	0	0.286495	0	0
AC202187.4_FG003	NA	NA	NA	NA	0		NA	0		0			NA	0	NA	0	NA	0	NA	0	NA	0	NA	0		NA	0	0	NA	0	0	0	0		NA	0	NA	0	0
AC202384.4_FG009	NA	NA	NA	NA	0		NA	0		0			NA	0	NA	0	NA	0	NA	0	NA	0	NA	0		NA	0	0	NA	0	0	0	0		NA	0	NA	0	0
AC202391.4_FG002	NA	NA	NA	NA	0		NA	0		0			NA	0	NA	0	NA	0	NA	0	NA	0	NA	0		NA	0	0	NA	0	0	0	0		NA	0	NA	0	0
AC202396.4_FG010	NA	NA	NA	NA	0		NA	0		0			NA	0	NA	0	NA	0	NA	0	NA	0	NA	0		NA	0	0	NA	0	0	0	0		NA	0	NA	0	0
AC202417.5_FG002	NA	NA	NA	NA	0		NA	0		0			NA	0	NA	0	NA	0	NA	0	NA	0	NA	0		NA	0	0	NA	0	0	0	0		NA	0	NA	0	0
AC202432.3_FG006	4	4	4	0.499292	0		0.695767	0		0			0.219408	0	0.367675	0	0.407749	0	0.343421	0	0.464315	0	0.658529	0		0.171203	0	0	0.221114	0	0	0	0		0.00204436	1	0.0103481	1	1
AC202435.3_FG001	4	4	4	0.369608	0		0.358792	0		0			0.0718414	0	0.507203	0	0.349963	0	0.0772153	0	0.0886082	0	0.765718	0		0.718998	0	0	0.694531	0	0	0	0		0.404823	0	0.404965	0	0
AC202435.3_FG003	NA	NA	NA	NA	0		NA	0		0			NA	0	NA	0	NA	0	NA	0	NA	0	NA	0		NA	0	0	NA	0	0	0	0		NA	0	NA	0	0
AC202439.3_FG001	2	2	2	0.582024	0		0.344561	0		0			4.76353e-05	1	0.0216618	1	0.00128006	1	0.0959149	0	0.327913	0	0.604708	0		0.403395	0	0	0.239226	0	0	0	0		0.187172	0	0.0771045	0	0
AC202439.3_FG006	2	0		0.556966	0		0.103285	0		0			0.00910125	1	0.136831	0	0.00275965	1	0.258756	0	0.310729	0	0.40498	0		NA	0	0	NA	0	0	0	0		NA	0	NA	0	0
AC202526.4_FG006	NA	NA	NA	NA	0		NA	0		0			NA	0	NA	0	NA	0	NA	0	NA	0	NA	0		NA	0	0	NA	0	0	0	0		NA	0	NA	0	0
AC202532.4_FG006	NA	NA	NA	NA	0		NA	0		0			NA	0	NA	0	NA	0	NA	0	NA	0	NA	0		NA	0	0	NA	0	0	0	0		NA	0	NA	0	0
AC202534.2_FG007	0	0	0	0.544561	0		0.695773	0		0			0.0340312	1	0.444605	0	0.208983	0	0.139928	0	0.300947	0	0.691478	0		NA	0	0	NA	0	0	0	0		NA	0	NA	0	0
AC202549.3_FG008	NA	NA	NA	NA	0		NA	0		0			NA	0	NA	0	NA	0	NA	0	NA	0	NA	0		NA	0	0	NA	0	0	0	0		NA	0	NA	0	0
AC202561.3_FG007	NA	NA	NA	NA	0		NA	0		0			NA	0	NA	0	NA	0	NA	0	NA	0	NA	0		NA	0	0	NA	0	0	0	0		NA	0	NA	0	0
AC202567.4_FG004	2	2	2	0.421137	0		0.495058	0		0			0.00651853	1	0.514311	0	0.351584	0	0.0235799	1	0.0384924	1	0.762744	0		NA	0	0	NA	0	0	0	0		NA	0	NA	0	0
AC202705.2_FG001	NA	NA	NA	NA	0		NA	0		0			NA	0	NA	0	NA	0	NA	0	NA	0	NA	0		NA	0	0	NA	0	0	0	0		NA	0	NA	0	0
AC202707.3_FG002	1	1	1	0.047247	1	1	0.023114	1	1	1	1		3.69996e-22	1	2.5571e-09	1	4.03911e-10	1	3.46522e-07	1	9.92494e-07	1	0.73686	0		0.409165	0	0	0.640807	0	0	0	0		0.00116508	1	4.48334e-05	1	1
AC202855.3_FG004	0	3		0.397315	0		0.504981	0		0			0.00430848	1	0.467501	0	0.289725	0	0.028537	1	0.0609301	0	0.748344	0		0.305633	0	0	0.182443	0	0	0	0		0.155112	0	0.31208	0	0
AC202864.3_FG002	0	0	0	0.603561	0		0.462634	0		0			0.0110135	1	0.196066	0	0.0522643	0	0.221629	0	0.438245	0	0.670557	0		0.102842	0	0	0.179465	0	0	0	0		0.160758	0	0.330088	0	0
AC202867.3_FG008	NA	NA	NA	NA	0		NA	0		0			NA	0	NA	0	NA	0	NA	0	NA	0	NA	0		NA	0	0	NA	0	0	0	0		NA	0	NA	0	0
AC202867.3_FG010	NA	NA	NA	NA	0		NA	0		0			NA	0	NA	0	NA	0	NA	0	NA	0	NA	0		NA	0	0	NA	0	0	0	0		NA	0	NA	0	0
AC202877.3_FG002	NA	NA	NA	NA	0		NA	0		0			NA	0	NA	0	NA	0	NA	0	NA	0	NA	0		NA	0	0	NA	0	0	0	0		NA	0	NA	0	0
AC202900.3_FG001	4	4	4	0.205922	0		0.28993	0		0			0.166301	0	0.124607	0	0.210596	0	0.18468	0	0.105086	0	0.129555	0		NA	0	0	NA	0	0	0	0		NA	0	NA	0	0
AC202911.3_FG002	NA	NA	NA	NA	0		NA	0		0			NA	0	NA	0	NA	0	NA	0	NA	0	NA	0		NA	0	0	NA	0	0	0	0		NA	0	NA	0	0
AC202915.3_FG002	2	3		0.478677	0		0.340507	0		0			0.000429862	1	0.295203	0	0.00669576	1	0.0205015	1	0.379531	0	0.327494	0		NA	0	0	NA	0	0	0	0		NA	0	NA	0	0
AC202921.3_FG004	NA	NA	NA	NA	0		NA	0		0			NA	0	NA	0	NA	0	NA	0	NA	0	NA	0		NA	0	0	NA	0	0	0	0		NA	0	NA	0	0
AC202930.4_FG007	NA	NA	NA	NA	0		NA	0		0			NA	0	NA	0	NA	0	NA	0	NA	0	NA	0		NA	0	0	NA	0	0	0	0		NA	0	NA	0	0
AC202930.4_FG008	NA	NA	NA	NA	0		NA	0		0			NA	0	NA	0	NA	0	NA	0	NA	0	NA	0		NA	0	0	NA	0	0	0	0		NA	0	NA	0	0
AC202940.3_FG004	4	4	4	0.358456	0		0.414605	0		0			0.296996	0	0.289486	0	0.234224	0	0.17889	0	0.284085	0	0.330624	0		NA	0	0	NA	0	0	0	0		NA	0	NA	0	0
AC202950.3_FG008	4	4	4	0.313739	0		0.651894	0		0			0.155569	0	0.397085	0	0.407246	0	0.106317	0	0.370575	0	0.577873	0		0.614112	0	0	0.758511	0	0	0	0		0.323181	0	0.250189	0	0
AC202953.3_FG003	4	4	4	0.614644	0		0.695383	0		0			0.102254	0	0.510503	0	0.329481	0	0.234906	0	0.353145	0	0.748091	0		NA	0	0	NA	0	0	0	0		NA	0	NA	0	0
AC202959.3_FG001	NA	NA	NA	NA	0		NA	0		0			NA	0	NA	0	NA	0	NA	0	NA	0	NA	0		NA	0	0	NA	0	0	0	0		NA	0	NA	0	0
AC202965.3_FG002	NA	NA	NA	NA	0		NA	0		0			NA	0	NA	0	NA	0	NA	0	NA	0	NA	0		NA	0	0	NA	0	0	0	0		NA	0	NA	0	0
AC202974.3_FG004	4	0		0.220994	0		0.615681	0		0			0.0915698	0	0.368971	0	0.225109	0	0.0440758	1	0.457884	0	0.347426	0		0.156384	0	0	0.472743	0	0	0	0		0.0899324	0	0.404965	0	0
AC202989.3_FG007	NA	NA	NA	NA	0		NA	0		0			NA	0	NA	0	NA	0	NA	0	NA	0	NA	0		NA	0	0	NA	0	0	0	0		NA	0	NA	0	0
AC202991.3_FG003	NA	NA	NA	NA	0		NA	0		0			NA	0	NA	0	NA	0	NA	0	NA	0	NA	0		NA	0	0	NA	0	0	0	0		NA	0	NA	0	0
AC203001.3_FG001	NA	NA	NA	NA	0		NA	0		0			NA	0	NA	0	NA	0	NA	0	NA	0	NA	0		NA	0	0	NA	0	0	0	0		NA	0	NA	0	0
AC203006.3_FG005	NA	NA	NA	NA	0		NA	0		0			NA	0	NA	0	NA	0	NA	0	NA	0	NA	0		NA	0	0	NA	0	0	0	0		NA	0	NA	0	0
AC203019.3_FG001	4	4	4	0.613235	0		0.512133	0		0			0.122221	0	0.523133	0	0.40766	0	0.259459	0	0.207419	0	0.69386	0		NA	0	0	NA	0	0	0	0		NA	0	NA	0	0
AC203027.3_FG003	4	4	4	0.497605	0		0.411873	0		0			0.245701	0	0.462253	0	0.246551	0	0.251037	0	0.224334	0	0.715102	0		NA	0	0	NA	0	0	0	0		NA	0	NA	0	0
AC203031.3_FG002	0	0	0	0.581759	0		0.460405	0		0			0.0241624	1	0.218572	0	0.0690765	0	0.284085	0	0.483068	0	0.688052	0		NA	0	0	NA	0	0	0	0		NA	0	NA	0	0
AC203048.3_FG001	0	0	0	0.43811	0		0.469514	0		0			0.0221718	1	0.125925	0	0.0781895	0	0.367975	0	0.453893	0	0.779328	0		NA	0	0	NA	0	0	0	0		NA	0	NA	0	0
AC203090.3_FG005	0	0	0	0.564929	0		0.68862	0		0			0.0354796	1	0.263191	0	0.245621	0	0.262968	0	0.240877	0	0.719018	0		NA	0	0	NA	0	0	0	0		NA	0	NA	0	0
AC203093.3_FG001	4	4	4	0.468476	0		0.485349	0		0			0.16631	0	0.287172	0	0.369629	0	0.34358	0	0.244105	0	0.442829	0		NA	0	0	NA	0	0	0	0		NA	0	NA	0	0
AC203101.3_FG002	NA	NA	NA	NA	0		NA	0		0			NA	0	NA	0	NA	0	NA	0	NA	0	NA	0		NA	0	0	NA	0	0	0	0		NA	0	NA	0	0
AC203148.3_FG005	NA	NA	NA	NA	0		NA	0		0			NA	0	NA	0	NA	0	NA	0	NA	0	NA	0		NA	0	0	NA	0	0	0	0		NA	0	NA	0	0
AC203159.3_FG009	NA	NA	NA	NA	0		NA	0		0			NA	0	NA	0	NA	0	NA	0	NA	0	NA	0		NA	0	0	NA	0	0	0	0		NA	0	NA	0	0
AC203159.3_FG010	NA	NA	NA	NA	0		NA	0		0			NA	0	NA	0	NA	0	NA	0	NA	0	NA	0		NA	0	0	NA	0	0	0	0		NA	0	NA	0	0
AC203173.3_FG001	3	3	3	0.0270341	1	3	0.0418701	1	3	1	3		6.6941e-05	1	0.000963323	1	0.000866316	1	0.317133	0	0.335969	0	0.747124	0		NA	0	0	NA	0	0	0	0		NA	0	NA	0	0
AC203173.3_FG002	2	1		0.635303	0		0.321175	0		0			3.01014e-12	1	3.86297e-06	1	1.15632e-08	1	0.00351376	1	0.0584727	0	0.515813	0		NA	0	0	NA	0	0	0	0		NA	0	NA	0	0
AC203173.3_FG004	4	4	4	0.666024	0		0.516957	0		0			0.137196	0	0.473197	0	0.189767	0	0.33045	0	0.465708	0	0.647017	0		0.63636	0	0	0.660183	0	0	0	0		0.249166	0	0.192297	0	0
AC203176.4_FG003	4	4	4	0.299079	0		0.546887	0		0			0.168371	0	0.380473	0	0.413142	0	0.117899	0	0.288628	0	0.660591	0		NA	0	0	NA	0	0	0	0		NA	0	NA	0	0
AC203183.3_FG001	NA	NA	NA	NA	0		NA	0		0			NA	0	NA	0	NA	0	NA	0	NA	0	NA	0		NA	0	0	NA	0	0	0	0		NA	0	NA	0	0
AC203208.4_FG001	NA	NA	NA	NA	0		NA	0		0			NA	0	NA	0	NA	0	NA	0	NA	0	NA	0		NA	0	0	NA	0	0	0	0		NA	0	NA	0	0
AC203220.3_FG006	3	0		0.489919	0		0.507539	0		0			0.000991991	1	0.0798343	0	0.0458583	1	0.079968	0	0.116105	0	0.771105	0		0.62599	0	0	0.736653	0	0	0	0		0.157339	0	0.0494793	1	0
AC203227.3_FG001	NA	NA	NA	NA	0		NA	0		0			NA	0	NA	0	NA	0	NA	0	NA	0	NA	0		NA	0	0	NA	0	0	0	0		NA	0	NA	0	0
AC203228.3_FG003	NA	NA	NA	NA	0		NA	0		0			NA	0	NA	0	NA	0	NA	0	NA	0	NA	0		NA	0	0	NA	0	0	0	0		NA	0	NA	0	0
AC203237.3_FG001	NA	NA	NA	NA	0		NA	0		0			NA	0	NA	0	NA	0	NA	0	NA	0	NA	0		NA	0	0	NA	0	0	0	0		NA	0	NA	0	0
AC203244.4_FG001	NA	NA	NA	NA	0		NA	0		0			NA	0	NA	0	NA	0	NA	0	NA	0	NA	0		NA	0	0	NA	0	0	0	0		NA	0	NA	0	0
AC203253.4_FG001	NA	NA	NA	NA	0		NA	0		0			NA	0	NA	0	NA	0	NA	0	NA	0	NA	0		NA	0	0	NA	0	0	0	0		NA	0	NA	0	0
AC203257.2_FG003	NA	NA	NA	NA	0		NA	0		0			NA	0	NA	0	NA	0	NA	0	NA	0	NA	0		NA	0	0	NA	0	0	0	0		NA	0	NA	0	0
AC203260.3_FG003	NA	NA	NA	NA	0		NA	0		0			NA	0	NA	0	NA	0	NA	0	NA	0	NA	0		NA	0	0	NA	0	0	0	0		NA	0	NA	0	0
AC203262.3_FG002	NA	NA	NA	NA	0		NA	0		0			NA	0	NA	0	NA	0	NA	0	NA	0	NA	0		NA	0	0	NA	0	0	0	0		NA	0	NA	0	0
AC203265.3_FG002	NA	NA	NA	NA	0		NA	0		0			NA	0	NA	0	NA	0	NA	0	NA	0	NA	0		NA	0	0	NA	0	0	0	0		NA	0	NA	0	0
AC203278.4_FG004	0	3		0.124688	0		0.482819	0		0			0.0160087	1	0.0373101	1	0.0952644	0	0.343446	0	0.317089	0	0.515829	0		NA	0	0	NA	0	0	0	0		NA	0	NA	0	0
AC203280.3_FG001	NA	NA	NA	NA	0		NA	0		0			NA	0	NA	0	NA	0	NA	0	NA	0	NA	0		NA	0	0	NA	0	0	0	0		NA	0	NA	0	0
AC203294.3_FG001	2	2	2	0.560368	0		0.371246	0		0			6.83105e-05	1	0.0162078	1	0.00150945	1	0.116689	0	0.323267	0	0.638724	0		NA	0	0	NA	0	0	0	0		NA	0	NA	0	0
AC203294.3_FG008	1	2		0.501465	0		0.499825	0		0			1.42569e-05	1	0.00172549	1	0.0236873	1	0.121646	0	0.017128	1	0.449474	0		0.671881	0	0	0.760426	0	0	0	0		0.206652	0	0.0894752	0	0
AC203294.3_FG012	2	2	2	0.397315	0		0.593705	0		0			2.02265e-07	1	0.000154907	1	0.000384374	1	0.105622	0	0.0639761	0	0.679877	0		NA	0	0	NA	0	0	0	0		NA	0	NA	0	0
AC203306.3_FG003	NA	NA	NA	NA	0		NA	0		0			NA	0	NA	0	NA	0	NA	0	NA	0	NA	0		NA	0	0	NA	0	0	0	0		NA	0	NA	0	0
AC203307.4_FG001	4	4	4	0.157524	0		0.514007	0		0			0.265369	0	0.134346	0	0.310862	0	0.101148	0	0.318254	0	0.218394	0		0.620925	0	0	0.69376	0	0	0	0		0.164488	0	0.28018	0	0
AC203311.3_FG005	NA	NA	NA	NA	0		NA	0		0			NA	0	NA	0	NA	0	NA	0	NA	0	NA	0		NA	0	0	NA	0	0	0	0		NA	0	NA	0	0
AC203316.3_FG003	NA	NA	NA	NA	0		NA	0		0			NA	0	NA	0	NA	0	NA	0	NA	0	NA	0		NA	0	0	NA	0	0	0	0		NA	0	NA	0	0
AC203316.3_FG004	NA	NA	NA	NA	0		NA	0		0			NA	0	NA	0	NA	0	NA	0	NA	0	NA	0		NA	0	0	NA	0	0	0	0		NA	0	NA	0	0
AC203324.3_FG008	NA	NA	NA	NA	0		NA	0		0			NA	0	NA	0	NA	0	NA	0	NA	0	NA	0		NA	0	0	NA	0	0	0	0		NA	0	NA	0	0
AC203332.3_FG001	NA	NA	NA	NA	0		NA	0		0			NA	0	NA	0	NA	0	NA	0	NA	0	NA	0		NA	0	0	NA	0	0	0	0		NA	0	NA	0	0
AC203341.3_FG003	NA	NA	NA	NA	0		NA	0		0			NA	0	NA	0	NA	0	NA	0	NA	0	NA	0		NA	0	0	NA	0	0	0	0		NA	0	NA	0	0
AC203359.3_FG001	3	1		0.239533	0		0.0860866	0		0			1.7087e-06	1	0.00313262	1	0.000395446	1	0.0156957	1	0.0883354	0	0.628086	0		NA	0	0	NA	0	0	0	0		NA	0	NA	0	0
AC203363.3_FG007	NA	NA	NA	NA	0		NA	0		0			NA	0	NA	0	NA	0	NA	0	NA	0	NA	0		NA	0	0	NA	0	0	0	0		NA	0	NA	0	0
AC203365.3_FG004	2	0		0.484723	0		0.483324	0		0			0.00376842	1	0.248152	0	0.0166166	1	0.0613846	0	0.396124	0	0.426794	0		NA	0	0	NA	0	0	0	0		NA	0	NA	0	0
AC203365.3_FG007	4	4	4	0.544178	0		0.464185	0		0			0.151968	0	0.574889	0	0.158206	0	0.236926	0	0.404788	0	0.476871	0		NA	0	0	NA	0	0	0	0		NA	0	NA	0	0
AC203366.4_FG001	3	0		0.479277	0		0.378914	0		0			0.0204868	1	0.502336	0	0.0458943	1	0.0757194	0	0.512628	0	0.35884	0		0.260452	0	0	0.634953	0	0	0	0		0.013479	1	0.181979	0	0
AC203381.3_FG006	NA	NA	NA	NA	0		NA	0		0			NA	0	NA	0	NA	0	NA	0	NA	0	NA	0		NA	0	0	NA	0	0	0	0		NA	0	NA	0	0
AC203382.3_FG005	NA	NA	NA	NA	0		NA	0		0			NA	0	NA	0	NA	0	NA	0	NA	0	NA	0		NA	0	0	NA	0	0	0	0		NA	0	NA	0	0
AC203392.3_FG004	4	4	4	0.202077	0		0.569548	0		0			0.294828	0	0.176734	0	0.33491	0	0.107219	0	0.387677	0	0.277237	0		0.227937	0	0	0.569989	0	0	0	0		0.124447	0	0.313238	0	0
AC203394.3_FG004	0	0	0	0.519205	0		0.667761	0		0			0.0412947	1	0.503969	0	0.207481	0	0.126628	0	0.342669	0	0.63842	0		0.649779	0	0	0.68056	0	0	0	0		0.138144	0	0.120016	0	0
AC203401.3_FG003	NA	NA	NA	NA	0		NA	0		0			NA	0	NA	0	NA	0	NA	0	NA	0	NA	0		NA	0	0	NA	0	0	0	0		NA	0	NA	0	0
AC203408.4_FG003	4	4	4	0.396383	0		0.639517	0		0			0.250379	0	0.365941	0	0.426277	0	0.182675	0	0.423426	0	0.634116	0		NA	0	0	NA	0	0	0	0		NA	0	NA	0	0
AC203423.3_FG009	NA	NA	NA	NA	0		NA	0		0			NA	0	NA	0	NA	0	NA	0	NA	0	NA	0		NA	0	0	NA	0	0	0	0		NA	0	NA	0	0
AC203424.3_FG001	3	3	3	0.0413349	1	3	0.0315358	1	3	1	3		0.00370325	1	0.335582	0	0.21087	0	0.000533984	1	0.000515761	1	0.76601	0		0.478111	0	0	0.595217	0	0	0	0		1.90138e-07	1	0.00286386	1	1
AC203430.3_FG007	3	0		0.615786	0		0.464161	0		0			0.00245536	1	0.27033	0	0.0399017	1	0.0558507	0	0.292603	0	0.549465	0		NA	0	0	NA	0	0	0	0		NA	0	NA	0	0
AC203437.2_FG002	NA	NA	NA	NA	0		NA	0		0			NA	0	NA	0	NA	0	NA	0	NA	0	NA	0		NA	0	0	NA	0	0	0	0		NA	0	NA	0	0
AC203439.3_FG005	0	0	0	0.508022	0		0.563416	0		0			0.0366536	1	0.172873	0	0.119974	0	0.373487	0	0.441779	0	0.770243	0		NA	0	0	NA	0	0	0	0		NA	0	NA	0	0
AC203531.3_FG002	NA	NA	NA	NA	0		NA	0		0			NA	0	NA	0	NA	0	NA	0	NA	0	NA	0		NA	0	0	NA	0	0	0	0		NA	0	NA	0	0
AC203535.4_FG001	0	2		0.144569	0		0.695762	0		0			0.0168672	1	0.41298	0	0.202956	0	0.00765363	1	0.238747	0	0.360509	0		0.715274	0	0	0.687191	0	0	0	0		0.315206	0	0.276458	0	0
AC203535.4_FG002	2	2	2	0.519855	0		0.0572814	0		0			4.84615e-06	1	0.0120005	1	2.30915e-05	1	0.0742123	0	0.498461	0	0.376915	0		0.716573	0	0	0.232311	0	0	0	0		3.2757e-05	1	0.0602102	0	0
AC203535.4_FG004	4	4	4	0.585286	0		0.18159	0		0			0.265603	0	0.529008	0	0.0818732	0	0.337392	0	0.132886	0	0.289875	0		0.657371	0	0	0.54054	0	0	0	0		0.206652	0	0.194886	0	0
AC203535.4_FG006	3	3	3	0.000481733	1	3	0.0397224	1	3	1	3		0.000815155	1	0.000104794	1	0.00161678	1	0.0856063	0	0.475363	0	0.426651	0		NA	0	0	NA	0	0	0	0		NA	0	NA	0	0
AC203535.4_FG007	NA	NA	NA	NA	0		NA	0		0			NA	0	NA	0	NA	0	NA	0	NA	0	NA	0		NA	0	0	NA	0	0	0	0		NA	0	NA	0	0
AC203570.4_FG005	4	4	4	0.437514	0		0.572167	0		0			0.143603	0	0.498988	0	0.230033	0	0.155833	0	0.49767	0	0.479173	0		NA	0	0	NA	0	0	0	0		NA	0	NA	0	0
AC203571.3_FG001	2	3		0.234291	0		0.161114	0		0			0.000585102	1	0.48699	0	0.00119127	1	0.00470551	1	0.493763	0	0.0593557	0		NA	0	0	NA	0	0	0	0		NA	0	NA	0	0
AC203571.3_FG007	NA	NA	NA	NA	0		NA	0		0			NA	0	NA	0	NA	0	NA	0	NA	0	NA	0		NA	0	0	NA	0	0	0	0		NA	0	NA	0	0
AC203672.3_FG001	NA	NA	NA	NA	0		NA	0		0			NA	0	NA	0	NA	0	NA	0	NA	0	NA	0		NA	0	0	NA	0	0	0	0		NA	0	NA	0	0
AC203748.3_FG002	NA	NA	NA	NA	0		NA	0		0			NA	0	NA	0	NA	0	NA	0	NA	0	NA	0		NA	0	0	NA	0	0	0	0		NA	0	NA	0	0
AC203752.5_FG002	0	2		0.386106	0		0.626865	0		0			0.00038376	1	0.387059	0	0.0513616	0	0.00877756	1	0.140877	0	0.490974	0		NA	0	0	NA	0	0	0	0		NA	0	NA	0	0
AC203753.4_FG006	0	4		0.407266	0		0.24196	0		0			0.101297	0	0.184059	0	0.0472507	1	0.354314	0	0.278409	0	0.667168	0		NA	0	0	NA	0	0	0	0		NA	0	NA	0	0
AC203753.4_FG007	NA	NA	NA	NA	0		NA	0		0			NA	0	NA	0	NA	0	NA	0	NA	0	NA	0		NA	0	0	NA	0	0	0	0		NA	0	NA	0	0
AC203754.4_FG007	NA	NA	NA	NA	0		NA	0		0			NA	0	NA	0	NA	0	NA	0	NA	0	NA	0		NA	0	0	NA	0	0	0	0		NA	0	NA	0	0
AC203754.4_FG008	3	2		0.453359	0		0.397824	0		0			2.45812e-05	1	0.224125	0	0.00428953	1	0.00599768	1	0.220333	0	0.35231	0		0.670351	0	0	0.758511	0	0	0	0		0.352186	0	0.302496	0	0
AC203761.3_FG002	3	0		0.584063	0		0.424301	0		0			0.0063078	1	0.159688	0	0.0368604	1	0.205104	0	0.426438	0	0.663875	0		NA	0	0	NA	0	0	0	0		NA	0	NA	0	0
AC203768.3_FG005	0	0	0	0.337308	0		0.473491	0		0			0.00218573	1	0.0521811	0	0.0503353	0	0.180733	0	0.161123	0	0.72265	0		NA	0	0	NA	0	0	0	0		NA	0	NA	0	0
AC203774.3_FG004	4	4	4	0.226845	0		0.598452	0		0			0.294984	0	0.215468	0	0.356956	0	0.134175	0	0.424488	0	0.562325	0		NA	0	0	NA	0	0	0	0		NA	0	NA	0	0
AC203777.3_FG001	4	4	4	0.66128	0		0.678675	0		0			0.084954	0	0.441051	0	0.33491	0	0.258017	0	0.307244	0	0.768662	0		NA	0	0	NA	0	0	0	0		NA	0	NA	0	0
AC203777.3_FG004	NA	NA	NA	NA	0		NA	0		0			NA	0	NA	0	NA	0	NA	0	NA	0	NA	0		NA	0	0	NA	0	0	0	0		NA	0	NA	0	0
AC203790.3_FG004	NA	NA	NA	NA	0		NA	0		0			NA	0	NA	0	NA	0	NA	0	NA	0	NA	0		NA	0	0	NA	0	0	0	0		NA	0	NA	0	0
AC203802.2_FG005	NA	NA	NA	NA	0		NA	0		0			NA	0	NA	0	NA	0	NA	0	NA	0	NA	0		NA	0	0	NA	0	0	0	0		NA	0	NA	0	0
AC203804.4_FG008	NA	NA	NA	NA	0		NA	0		0			NA	0	NA	0	NA	0	NA	0	NA	0	NA	0		NA	0	0	NA	0	0	0	0		NA	0	NA	0	0
AC203806.3_FG006	NA	NA	NA	NA	0		NA	0		0			NA	0	NA	0	NA	0	NA	0	NA	0	NA	0		NA	0	0	NA	0	0	0	0		NA	0	NA	0	0
AC203831.3_FG002	4	0		0.0677494	0		0.566796	0		0			0.200548	0	0.0478493	1	0.267138	0	0.0675556	0	0.461916	0	0.402786	0		NA	0	0	NA	0	0	0	0		NA	0	NA	0	0
AC203834.4_FG004	NA	NA	NA	NA	0		NA	0		0			NA	0	NA	0	NA	0	NA	0	NA	0	NA	0		NA	0	0	NA	0	0	0	0		NA	0	NA	0	0
AC203841.3_FG002	3	1		0.223401	0		0.0063387	1	3	0			1.31148e-10	1	4.33856e-05	1	1.75393e-08	1	0.038121	1	0.360702	0	0.425961	0		0.53326	0	0	0.701854	0	0	0	0		0.0116315	1	0.144239	0	0
AC203841.3_FG009	3	3	3	0.00313648	1	3	0.0123953	1	3	1	3		8.57046e-14	1	0.392125	0	0.180859	0	6.62928e-11	1	9.90643e-10	1	0.705522	0		0.33206	0	0	0.645141	0	0	0	0		2.32924e-19	1	2.99882e-10	1	1
AC203847.3_FG004	NA	NA	NA	NA	0		NA	0		0			NA	0	NA	0	NA	0	NA	0	NA	0	NA	0		NA	0	0	NA	0	0	0	0		NA	0	NA	0	0
AC203847.3_FG009	NA	NA	NA	NA	0		NA	0		0			NA	0	NA	0	NA	0	NA	0	NA	0	NA	0		NA	0	0	NA	0	0	0	0		NA	0	NA	0	0
AC203855.2_FG001	NA	NA	NA	NA	0		NA	0		0			NA	0	NA	0	NA	0	NA	0	NA	0	NA	0		NA	0	0	NA	0	0	0	0		NA	0	NA	0	0
AC203862.4_FG001	2	2	2	0.249474	0		0.321608	0		0			1.88591e-06	1	0.000566816	1	0.000516853	1	0.205741	0	0.230792	0	0.762392	0		0.258924	0	0	0.197406	0	0	0	0		0.404823	0	0.278554	0	0
AC203862.4_FG002	4	4	4	0.543108	0		0.668379	0		0			0.245817	0	0.425107	0	0.448982	0	0.359052	0	0.45026	0	0.659136	0		NA	0	0	NA	0	0	0	0		NA	0	NA	0	0
AC203865.3_FG001	2	2	2	0.422468	0		0.193657	0		0			5.10973e-05	1	0.0103285	1	0.000586327	1	0.173594	0	0.426438	0	0.626601	0		NA	0	0	NA	0	0	0	0		NA	0	NA	0	0
AC203900.3_FG006	NA	NA	NA	NA	0		NA	0		0			NA	0	NA	0	NA	0	NA	0	NA	0	NA	0		NA	0	0	NA	0	0	0	0		NA	0	NA	0	0
AC203909.3_FG003	1	1	1	0.242658	0		0.37717	0		0			6.71064e-10	1	0.00026254	1	0.000407339	1	0.00603709	1	0.00306551	1	0.720756	0		0.674685	0	0	0.649639	0	0	0	0		0.0662614	0	0.0578472	0	0
AC203909.3_FG006	NA	NA	NA	NA	0		NA	0		0			NA	0	NA	0	NA	0	NA	0	NA	0	NA	0		NA	0	0	NA	0	0	0	0		NA	0	NA	0	0
AC203909.3_FG007	0	2		0.128325	0		0.596836	0		0			0.0213279	1	0.274962	0	0.325568	0	0.00720692	1	0.125255	0	0.387097	0		NA	0	0	NA	0	0	0	0		NA	0	NA	0	0
AC203909.3_FG010	NA	NA	NA	NA	0		NA	0		0			NA	0	NA	0	NA	0	NA	0	NA	0	NA	0		NA	0	0	NA	0	0	0	0		NA	0	NA	0	0
AC203925.3_FG002	NA	NA	NA	NA	0		NA	0		0			NA	0	NA	0	NA	0	NA	0	NA	0	NA	0		NA	0	0	NA	0	0	0	0		NA	0	NA	0	0
AC203928.4_FG001	NA	NA	NA	NA	0		NA	0		0			NA	0	NA	0	NA	0	NA	0	NA	0	NA	0		NA	0	0	NA	0	0	0	0		NA	0	NA	0	0
AC203944.4_FG002	NA	NA	NA	NA	0		NA	0		0			NA	0	NA	0	NA	0	NA	0	NA	0	NA	0		NA	0	0	NA	0	0	0	0		NA	0	NA	0	0
AC203955.3_FG002	NA	NA	NA	NA	0		NA	0		0			NA	0	NA	0	NA	0	NA	0	NA	0	NA	0		NA	0	0	NA	0	0	0	0		NA	0	NA	0	0
AC203955.3_FG005	0	0	0	0.450662	0		0.568286	0		0			0.0271601	1	0.168222	0	0.144087	0	0.321717	0	0.331839	0	0.739093	0		NA	0	0	NA	0	0	0	0		NA	0	NA	0	0
AC203956.3_FG004	3	3	3	0.315667	0		0.118591	0		0			0.000450717	1	0.0302757	1	0.00508529	1	0.0897157	0	0.307592	0	0.607996	0		NA	0	0	NA	0	0	0	0		NA	0	NA	0	0
AC203957.3_FG001	3	2		0.558993	0		0.426143	0		0			0.000175323	1	0.0741633	0	0.0194789	1	0.024568	1	0.0853091	0	0.67715	0		NA	0	0	NA	0	0	0	0		NA	0	NA	0	0
AC203957.3_FG004	2	7		0.00240517	1	7	0.00849877	1	2	1			0.0259429	1	0.000131101	1	0.000316093	1	0.0237403	1	0.0733043	0	0.708139	0		0.540249	0	0	0.210451	0	0	0	0		0.0880063	0	0.00562767	1	0
AC203966.5_FG002	3	3	3	0.184537	0		0.561925	0		0			0.000318776	1	0.00522961	1	0.0344042	1	0.339078	0	0.154554	0	0.550255	0		NA	0	0	NA	0	0	0	0		NA	0	NA	0	0
AC203966.5_FG003	4	4	4	0.245872	0		0.520478	0		0			0.156986	0	0.326909	0	0.203293	0	0.0724716	0	0.453309	0	0.273847	0		NA	0	0	NA	0	0	0	0		NA	0	NA	0	0
AC203966.5_FG005	4	4	4	0.324009	0		0.421082	0		0			0.267375	0	0.25556	0	0.249688	0	0.193248	0	0.253559	0	0.264204	0		0.57309	0	0	0.743409	0	0	0	0		0.366445	0	0.113092	0	0
AC203966.5_FG006	4	4	4	0.573113	0		0.500862	0		0			0.160406	0	0.579248	0	0.365641	0	0.253466	0	0.227664	0	0.715945	0		NA	0	0	NA	0	0	0	0		NA	0	NA	0	0
AC203972.3_FG001	4	4	4	0.308231	0		0.474225	0		0			0.0809674	0	0.449205	0	0.419073	0	0.0625623	0	0.1537	0	0.714684	0		0.158388	0	0	0.0251102	1	0	0	0		0.0034914	1	0.0001009	1	1
AC203972.3_FG003	0	0	0	0.662633	0		0.574893	0		0			0.0155537	1	0.31074	0	0.113914	0	0.155424	0	0.335131	0	0.683978	0		0.673725	0	0	0.745017	0	0	0	0		0.206652	0	0.0664925	0	0
AC203976.4_FG001	NA	NA	NA	NA	0		NA	0		0			NA	0	NA	0	NA	0	NA	0	NA	0	NA	0		NA	0	0	NA	0	0	0	0		NA	0	NA	0	0
AC203980.3_FG003	NA	NA	NA	NA	0		NA	0		0			NA	0	NA	0	NA	0	NA	0	NA	0	NA	0		NA	0	0	NA	0	0	0	0		NA	0	NA	0	0
AC203985.4_FG001	2	2	2	0.353191	0		0.115822	0		0			0.00674062	1	0.0399966	1	0.00280714	1	0.392369	0	0.341837	0	0.597422	0		NA	0	0	NA	0	0	0	0		NA	0	NA	0	0
AC203985.4_FG005	4	4	4	0.650357	0		0.329491	0		0			0.1711	0	0.48083	0	0.109775	0	0.369451	0	0.299859	0	0.527258	0		NA	0	0	NA	0	0	0	0		NA	0	NA	0	0
AC203986.3_FG013	NA	NA	NA	NA	0		NA	0		0			NA	0	NA	0	NA	0	NA	0	NA	0	NA	0		NA	0	0	NA	0	0	0	0		NA	0	NA	0	0
AC203989.4_FG001	2	2	2	0.307104	0		0.000700728	1	2	0			0.00219132	1	0.0210422	1	2.69304e-06	1	0.366635	0	0.057157	0	0.196977	0		0.696865	0	0	0.271828	0	0	0	0		4.62298e-05	1	0.239195	0	0
AC204007.3_FG001	NA	NA	NA	NA	0		NA	0		0			NA	0	NA	0	NA	0	NA	0	NA	0	NA	0		NA	0	0	NA	0	0	0	0		NA	0	NA	0	0
AC204007.3_FG008	0	3		0.438151	0		0.694577	0		0			0.000343345	1	0.303664	0	0.0720685	0	0.0159696	1	0.0997934	0	0.621153	0		0.417407	0	0	0.666395	0	0	0	0		0.0682845	0	5.46854e-06	1	0
AC204009.3_FG009	NA	NA	NA	NA	0		NA	0		0			NA	0	NA	0	NA	0	NA	0	NA	0	NA	0		NA	0	0	NA	0	0	0	0		NA	0	NA	0	0
AC204015.3_FG006	NA	NA	NA	NA	0		NA	0		0			NA	0	NA	0	NA	0	NA	0	NA	0	NA	0		NA	0	0	NA	0	0	0	0		NA	0	NA	0	0
AC204017.4_FG003	3	3	3	0.0398875	1	3	0.0815083	0		0			0.00390433	1	0.0124366	1	0.0122673	1	0.357037	0	0.475194	0	0.678601	0		NA	0	0	NA	0	0	0	0		NA	0	NA	0	0
AC204035.3_FG003	NA	NA	NA	NA	0		NA	0		0			NA	0	NA	0	NA	0	NA	0	NA	0	NA	0		NA	0	0	NA	0	0	0	0		NA	0	NA	0	0
AC204048.3_FG002	3	3	3	0.331813	0		0.00379414	1	3	0			1.57435e-05	1	0.008399	1	1.24074e-05	1	0.0952031	0	0.412327	0	0.280398	0		0.575894	0	0	0.353611	0	0	0	0		0.134284	0	0.201096	0	0
AC204050.4_FG006	2	0		0.469794	0		0.218744	0		0			0.0186855	1	0.507655	0	0.332206	0	0.0667909	0	0.0184935	1	0.606493	0		0.126351	0	0	0.0469565	1	0	0	0		0.206652	0	0.0445073	1	0
AC204051.3_FG001	NA	NA	NA	NA	0		NA	0		0			NA	0	NA	0	NA	0	NA	0	NA	0	NA	0		NA	0	0	NA	0	0	0	0		NA	0	NA	0	0
AC204060.3_FG010	NA	NA	NA	NA	0		NA	0		0			NA	0	NA	0	NA	0	NA	0	NA	0	NA	0		NA	0	0	NA	0	0	0	0		NA	0	NA	0	0
AC204070.3_FG004	0	0	0	0.635264	0		0.689379	0		0			0.00344909	1	0.183797	0	0.151755	0	0.135258	0	0.142502	0	0.754735	0		0.431462	0	0	0.372097	0	0	0	0		0.143038	0	0.0982028	0	0
AC204088.3_FG010	NA	NA	NA	NA	0		NA	0		0			NA	0	NA	0	NA	0	NA	0	NA	0	NA	0		NA	0	0	NA	0	0	0	0		NA	0	NA	0	0
AC204212.4_FG001	7	2		0.231109	0		0.00594857	1	7	0			0.0330954	1	0.443213	0	0.0325408	1	0.0216999	1	0.000268319	1	0.364564	0		0.528976	0	0	0.720188	0	0	0	0		0.250029	0	0.404965	0	0
AC204213.1_FG007	NA	NA	NA	NA	0		NA	0		0			NA	0	NA	0	NA	0	NA	0	NA	0	NA	0		NA	0	0	NA	0	0	0	0		NA	0	NA	0	0
AC204231.3_FG010	NA	NA	NA	NA	0		NA	0		0			NA	0	NA	0	NA	0	NA	0	NA	0	NA	0		NA	0	0	NA	0	0	0	0		NA	0	NA	0	0
AC204252.3_FG001	NA	NA	NA	NA	0		NA	0		0			NA	0	NA	0	NA	0	NA	0	NA	0	NA	0		NA	0	0	NA	0	0	0	0		NA	0	NA	0	0
AC204254.3_FG001	0	0	0	0.606932	0		0.695214	0		0			0.000773797	1	0.173138	0	0.074885	0	0.0629834	0	0.130809	0	0.735978	0		0.729985	0	0	0.485585	0	0	0	0		0.00452737	1	0.0242765	1	1
AC204271.3_FG003	5	3		0.252079	0		3.7453e-05	1	5	0			0.00520518	1	0.572745	0	0.0131444	1	0.0127839	1	1.03927e-06	1	0.122002	0		0.50651	0	0	0.640042	0	0	0	0		6.20047e-06	1	7.53653e-06	1	1
AC204277.3_FG006	4	4	4	0.400349	0		0.605944	0		0			0.146162	0	0.224853	0	0.44284	0	0.323213	0	0.311795	0	0.481738	0		0.685626	0	0	0.743222	0	0	0	0		0.0309024	1	0.0555369	0	0
AC204292.4_FG002	0	0	0	0.646732	0		0.49651	0		0			0.00719525	1	0.27271	0	0.0558419	0	0.125989	0	0.374939	0	0.611029	0		0.757842	0	0	0.39632	0	0	0	0		0.352186	0	0.0646491	0	0
AC204292.4_FG003	4	4	4	0.543108	0		0.431446	0		0			0.0827529	0	0.547439	0	0.38765	0	0.171312	0	0.127685	0	0.700053	0		0.760194	0	0	0.716769	0	0	0	0		0.349101	0	0.2672	0	0
AC204292.4_FG005	NA	NA	NA	NA	0		NA	0		0			NA	0	NA	0	NA	0	NA	0	NA	0	NA	0		NA	0	0	NA	0	0	0	0		NA	0	NA	0	0
AC204292.4_FG006	4	4	4	0.505822	0		0.684416	0		0			0.184165	0	0.35595	0	0.40119	0	0.37592	0	0.419434	0	0.65144	0		NA	0	0	NA	0	0	0	0		NA	0	NA	0	0
AC204298.3_FG006	0	0	0	0.33363	0		0.5396	0		0			0.00527916	1	0.0518385	0	0.304263	0	0.329847	0	0.0511524	0	0.361989	0		NA	0	0	NA	0	0	0	0		NA	0	NA	0	0
AC204300.3_FG003	NA	NA	NA	NA	0		NA	0		0			NA	0	NA	0	NA	0	NA	0	NA	0	NA	0		NA	0	0	NA	0	0	0	0		NA	0	NA	0	0
AC204300.3_FG009	NA	NA	NA	NA	0		NA	0		0			NA	0	NA	0	NA	0	NA	0	NA	0	NA	0		NA	0	0	NA	0	0	0	0		NA	0	NA	0	0
AC204306.3_FG007	2	3		0.0627529	0		0.633347	0		0			0.00197631	1	0.48028	0	0.00818073	1	0.00696048	1	0.124664	0	0.161888	0		NA	0	0	NA	0	0	0	0		NA	0	NA	0	0
AC204311.4_FG004	4	4	4	0.583777	0		0.59272	0		0			0.227204	0	0.450551	0	0.402889	0	0.400591	0	0.361621	0	0.625546	0		NA	0	0	NA	0	0	0	0		NA	0	NA	0	0
AC204325.3_FG003	NA	NA	NA	NA	0		NA	0		0			NA	0	NA	0	NA	0	NA	0	NA	0	NA	0		NA	0	0	NA	0	0	0	0		NA	0	NA	0	0
AC204351.3_FG004	NA	NA	NA	NA	0		NA	0		0			NA	0	NA	0	NA	0	NA	0	NA	0	NA	0		NA	0	0	NA	0	0	0	0		NA	0	NA	0	0
AC204352.3_FG012	4	4	4	0.663183	0		0.364371	0		0			0.212549	0	0.533016	0	0.232896	0	0.372928	0	0.170822	0	0.525699	0		NA	0	0	NA	0	0	0	0		NA	0	NA	0	0
AC204359.3_FG004	NA	NA	NA	NA	0		NA	0		0			NA	0	NA	0	NA	0	NA	0	NA	0	NA	0		NA	0	0	NA	0	0	0	0		NA	0	NA	0	0
AC204359.3_FG005	0	3		0.298776	0		0.593435	0		0			0.00565843	1	0.556111	0	0.081655	0	0.0165692	1	0.294675	0	0.385475	0		0.561649	0	0	0.5231	0	0	0	0		7.74994e-05	1	0.000139919	1	1
AC204377.3_FG001	NA	NA	NA	NA	0		NA	0		0			NA	0	NA	0	NA	0	NA	0	NA	0	NA	0		NA	0	0	NA	0	0	0	0		NA	0	NA	0	0
AC204381.3_FG001	0	0	0	0.632241	0		0.590723	0		0			0.0286327	1	0.312767	0	0.103717	0	0.196387	0	0.408578	0	0.660832	0		NA	0	0	NA	0	0	0	0		NA	0	NA	0	0
AC204383.2_FG002	NA	NA	NA	NA	0		NA	0		0			NA	0	NA	0	NA	0	NA	0	NA	0	NA	0		NA	0	0	NA	0	0	0	0		NA	0	NA	0	0
AC204387.3_FG002	NA	NA	NA	NA	0		NA	0		0			NA	0	NA	0	NA	0	NA	0	NA	0	NA	0		NA	0	0	NA	0	0	0	0		NA	0	NA	0	0
AC204437.3_FG004	0	4		0.549059	0		0.163815	0		0			0.066906	0	0.262992	0	0.0215666	1	0.376965	0	0.252545	0	0.485455	0		0.719762	0	0	0.744203	0	0	0	0		0.265943	0	0.287694	0	0
AC204472.3_FG002	4	4	4	0.459305	0		0.335725	0		0			0.066413	0	0.573504	0	0.363022	0	0.123811	0	0.0913012	0	0.702713	0		NA	0	0	NA	0	0	0	0		NA	0	NA	0	0
AC204476.3_FG004	NA	NA	NA	NA	0		NA	0		0			NA	0	NA	0	NA	0	NA	0	NA	0	NA	0		NA	0	0	NA	0	0	0	0		NA	0	NA	0	0
AC204502.4_FG006	1	1	1	0.103782	0		0.605248	0		0			1.17312e-20	1	6.57101e-06	1	1.09732e-11	1	1.56384e-08	1	0.000280645	1	0.177422	0		0.253855	0	0	0.121623	0	0	0	0		0.024306	1	0.124379	0	0
AC204515.4_FG003	NA	NA	NA	NA	0		NA	0		0			NA	0	NA	0	NA	0	NA	0	NA	0	NA	0		NA	0	0	NA	0	0	0	0		NA	0	NA	0	0
AC204515.4_FG006	0	0	0	0.273903	0		0.420804	0		0			0.0313943	1	0.0525653	0	0.442411	0	0.342418	0	0.0876267	0	0.226773	0		0.405824	0	0	0.716745	0	0	0	0		0.00188465	1	0.0664925	0	0
AC204519.3_FG003	0	0	0	0.616463	0		0.582292	0		0			0.0480369	1	0.379751	0	0.128697	0	0.21265	0	0.45215	0	0.637733	0		NA	0	0	NA	0	0	0	0		NA	0	NA	0	0
AC204520.3_FG005	NA	NA	NA	NA	0		NA	0		0			NA	0	NA	0	NA	0	NA	0	NA	0	NA	0		NA	0	0	NA	0	0	0	0		NA	0	NA	0	0
AC204530.4_FG002	0	2		0.216075	0		0.664924	0		0			0.00376842	1	0.56167	0	0.169174	0	0.00684437	1	0.135201	0	0.473413	0		NA	0	0	NA	0	0	0	0		NA	0	NA	0	0
AC204530.4_FG003	4	4	4	0.451004	0		0.597755	0		0			0.093775	0	0.529949	0	0.419379	0	0.1232	0	0.244572	0	0.714743	0		NA	0	0	NA	0	0	0	0		NA	0	NA	0	0
AC204530.4_FG006	3	1		0.605835	0		0.00778023	1	3	0			7.88829e-09	1	0.00770309	1	1.27265e-07	1	0.00645223	1	0.438209	0	0.144206	0		0.703229	0	0	0.732566	0	0	0	0		0.0885545	0	0.0370952	1	0
AC204539.4_FG001	NA	NA	NA	NA	0		NA	0		0			NA	0	NA	0	NA	0	NA	0	NA	0	NA	0		NA	0	0	NA	0	0	0	0		NA	0	NA	0	0
AC204539.4_FG002	0	0	0	0.563575	0		0.615576	0		0			0.0385391	1	0.431932	0	0.145094	0	0.160187	0	0.398742	0	0.62734	0		NA	0	0	NA	0	0	0	0		NA	0	NA	0	0
AC204539.4_FG003	1	1	1	3.79185e-06	1	1	7.45727e-05	1	1	1	1		4.92282e-22	1	3.29653e-15	1	6.10862e-14	1	0.0262729	1	0.00770003	1	0.65005	0		0.316929	0	0	0.424749	0	0	0	0		0.00350759	1	0.198587	0	0
AC204540.3_FG001	NA	NA	NA	NA	0		NA	0		0			NA	0	NA	0	NA	0	NA	0	NA	0	NA	0		NA	0	0	NA	0	0	0	0		NA	0	NA	0	0
AC204552.3_FG001	2	2	2	0.400111	0		0.625537	0		0			0.00116413	1	0.0636895	0	0.0850579	0	0.0240923	1	0.00736643	1	0.620779	0		NA	0	0	NA	0	0	0	0		NA	0	NA	0	0
AC204563.3_FG011	NA	NA	NA	NA	0		NA	0		0			NA	0	NA	0	NA	0	NA	0	NA	0	NA	0		NA	0	0	NA	0	0	0	0		NA	0	NA	0	0
AC204569.3_FG002	NA	NA	NA	NA	0		NA	0		0			NA	0	NA	0	NA	0	NA	0	NA	0	NA	0		NA	0	0	NA	0	0	0	0		NA	0	NA	0	0
AC204573.3_FG002	NA	NA	NA	NA	0		NA	0		0			NA	0	NA	0	NA	0	NA	0	NA	0	NA	0		NA	0	0	NA	0	0	0	0		NA	0	NA	0	0
AC204573.3_FG015	NA	NA	NA	NA	0		NA	0		0			NA	0	NA	0	NA	0	NA	0	NA	0	NA	0		NA	0	0	NA	0	0	0	0		NA	0	NA	0	0
AC204581.3_FG003	NA	NA	NA	NA	0		NA	0		0			NA	0	NA	0	NA	0	NA	0	NA	0	NA	0		NA	0	0	NA	0	0	0	0		NA	0	NA	0	0
AC204591.3_FG002	NA	NA	NA	NA	0		NA	0		0			NA	0	NA	0	NA	0	NA	0	NA	0	NA	0		NA	0	0	NA	0	0	0	0		NA	0	NA	0	0
AC204604.3_FG008	0	0	0	0.584063	0		0.601722	0		0			0.0136341	1	0.378855	0	0.115444	0	0.111428	0	0.330828	0	0.632738	0		NA	0	0	NA	0	0	0	0		NA	0	NA	0	0
AC204605.3_FG008	NA	NA	NA	NA	0		NA	0		0			NA	0	NA	0	NA	0	NA	0	NA	0	NA	0		NA	0	0	NA	0	0	0	0		NA	0	NA	0	0
AC204611.4_FG001	1	1	1	0.468609	0		0.625258	0		0			5.48261e-11	1	0.0158984	1	0.00320854	1	0.000227108	1	0.001195	1	0.710473	0		0.1366	0	0	0.218226	0	0	0	0		0.143537	0	0.151177	0	0
AC204618.3_FG001	NA	NA	NA	NA	0		NA	0		0			NA	0	NA	0	NA	0	NA	0	NA	0	NA	0		NA	0	0	NA	0	0	0	0		NA	0	NA	0	0
AC204619.3_FG003	NA	NA	NA	NA	0		NA	0		0			NA	0	NA	0	NA	0	NA	0	NA	0	NA	0		NA	0	0	NA	0	0	0	0		NA	0	NA	0	0
AC204621.4_FG006	NA	NA	NA	NA	0		NA	0		0			NA	0	NA	0	NA	0	NA	0	NA	0	NA	0		NA	0	0	NA	0	0	0	0		NA	0	NA	0	0
AC204636.3_FG003	NA	NA	NA	NA	0		NA	0		0			NA	0	NA	0	NA	0	NA	0	NA	0	NA	0		NA	0	0	NA	0	0	0	0		NA	0	NA	0	0
AC204641.5_FG001	0	0	0	0.664777	0		0.668459	0		0			0.0274859	1	0.352378	0	0.211189	0	0.164614	0	0.24839	0	0.76164	0		NA	0	0	NA	0	0	0	0		NA	0	NA	0	0
AC204641.5_FG003	NA	NA	NA	NA	0		NA	0		0			NA	0	NA	0	NA	0	NA	0	NA	0	NA	0		NA	0	0	NA	0	0	0	0		NA	0	NA	0	0
AC204659.3_FG005	NA	NA	NA	NA	0		NA	0		0			NA	0	NA	0	NA	0	NA	0	NA	0	NA	0		NA	0	0	NA	0	0	0	0		NA	0	NA	0	0
AC204662.3_FG005	4	4	4	0.606031	0		0.603806	0		0			0.292907	0	0.529354	0	0.356956	0	0.371744	0	0.426438	0	0.65319	0		NA	0	0	NA	0	0	0	0		NA	0	NA	0	0
AC204679.3_FG003	NA	NA	NA	NA	0		NA	0		0			NA	0	NA	0	NA	0	NA	0	NA	0	NA	0		NA	0	0	NA	0	0	0	0		NA	0	NA	0	0
AC204687.3_FG001	NA	NA	NA	NA	0		NA	0		0			NA	0	NA	0	NA	0	NA	0	NA	0	NA	0		NA	0	0	NA	0	0	0	0		NA	0	NA	0	0
AC204690.4_FG005	NA	NA	NA	NA	0		NA	0		0			NA	0	NA	0	NA	0	NA	0	NA	0	NA	0		NA	0	0	NA	0	0	0	0		NA	0	NA	0	0
AC204703.3_FG007	4	4	4	0.589704	0		0.570002	0		0			0.177531	0	0.571417	0	0.421299	0	0.289295	0	0.311191	0	0.75171	0		NA	0	0	NA	0	0	0	0		NA	0	NA	0	0
AC204707.4_FG001	NA	NA	NA	NA	0		NA	0		0			NA	0	NA	0	NA	0	NA	0	NA	0	NA	0		NA	0	0	NA	0	0	0	0		NA	0	NA	0	0
AC204710.4_FG003	0	4		0.433992	0		0.0702456	0		0			0.238401	0	0.327692	0	0.0350835	1	0.28725	0	0.0792159	0	0.484402	0		0.596485	0	0	0.441981	0	0	0	0		0.188255	0	0.0242765	1	0
AC204711.3_FG002	4	4	4	0.582291	0		0.312455	0		0			0.108866	0	0.530064	0	0.0721176	0	0.231415	0	0.328962	0	0.393727	0		0.714534	0	0	0.628995	0	0	0	0		0.138144	0	0.165649	0	0
AC204711.3_FG003	5	5	5	2.71578e-06	1	5	0.000129485	1	5	1	5		0.00631652	1	0.00388173	1	0.016751	1	3.47546e-08	1	2.04002e-06	1	0.630783	0		0.00199278	1	1	0.0868388	0	0	0	0		4.09335e-25	1	1.51624e-17	1	1
AC204712.3_FG002	4	4	4	0.510259	0		0.641504	0		0			0.157634	0	0.538533	0	0.301157	0	0.208804	0	0.48431	0	0.609164	0		NA	0	0	NA	0	0	0	0		NA	0	NA	0	0
AC204712.3_FG006	NA	NA	NA	NA	0		NA	0		0			NA	0	NA	0	NA	0	NA	0	NA	0	NA	0		NA	0	0	NA	0	0	0	0		NA	0	NA	0	0
AC204717.3_FG005	4	4	4	0.362958	0		0.431277	0		0			0.295773	0	0.301535	0	0.228836	0	0.18647	0	0.271282	0	0.765839	0		NA	0	0	NA	0	0	0	0		NA	0	NA	0	0
AC204763.2_FG001	4	4	4	0.562802	0		0.548667	0		0			0.113956	0	0.345874	0	0.433013	0	0.396437	0	0.225677	0	0.56431	0		NA	0	0	NA	0	0	0	0		NA	0	NA	0	0
AC204768.3_FG001	NA	NA	NA	NA	0		NA	0		0			NA	0	NA	0	NA	0	NA	0	NA	0	NA	0		NA	0	0	NA	0	0	0	0		NA	0	NA	0	0
AC204772.2_FG002	NA	NA	NA	NA	0		NA	0		0			NA	0	NA	0	NA	0	NA	0	NA	0	NA	0		NA	0	0	NA	0	0	0	0		NA	0	NA	0	0
AC204821.3_FG004	NA	NA	NA	NA	0		NA	0		0			NA	0	NA	0	NA	0	NA	0	NA	0	NA	0		NA	0	0	NA	0	0	0	0		NA	0	NA	0	0
AC204845.3_FG008	NA	NA	NA	NA	0		NA	0		0			NA	0	NA	0	NA	0	NA	0	NA	0	NA	0		NA	0	0	NA	0	0	0	0		NA	0	NA	0	0
AC204868.3_FG004	4	4	4	0.460604	0		0.59404	0		0			0.146746	0	0.272286	0	0.250467	0	0.362476	0	0.513492	0	0.726037	0		0.649246	0	0	0.760386	0	0	0	0		0.404823	0	0.189007	0	0
AC204887.4_FG003	NA	NA	NA	NA	0		NA	0		0			NA	0	NA	0	NA	0	NA	0	NA	0	NA	0		NA	0	0	NA	0	0	0	0		NA	0	NA	0	0
AC204891.4_FG001	3	3	3	0.268546	0		0.565383	0		0			3.24621e-06	1	0.266049	0	0.0582913	0	0.000896436	1	0.0111105	1	0.623029	0		0.697044	0	0	0.239438	0	0	0	0		0.000166593	1	0.172375	0	0
AC204893.3_FG001	NA	NA	NA	NA	0		NA	0		0			NA	0	NA	0	NA	0	NA	0	NA	0	NA	0		NA	0	0	NA	0	0	0	0		NA	0	NA	0	0
AC204897.3_FG007	NA	NA	NA	NA	0		NA	0		0			NA	0	NA	0	NA	0	NA	0	NA	0	NA	0		NA	0	0	NA	0	0	0	0		NA	0	NA	0	0
AC204931.3_FG002	NA	NA	NA	NA	0		NA	0		0			NA	0	NA	0	NA	0	NA	0	NA	0	NA	0		NA	0	0	NA	0	0	0	0		NA	0	NA	0	0
AC204931.3_FG004	1	1	1	0.490464	0		0.351977	0		0			8.89287e-05	1	0.0467005	1	0.0130838	1	0.00254487	1	0.0118289	1	0.660591	0		NA	0	0	NA	0	0	0	0		NA	0	NA	0	0
AC204944.3_FG004	NA	NA	NA	NA	0		NA	0		0			NA	0	NA	0	NA	0	NA	0	NA	0	NA	0		NA	0	0	NA	0	0	0	0		NA	0	NA	0	0
AC204953.3_FG002	4	4	4	0.545754	0		0.547568	0		0			0.0713689	0	0.251017	0	0.142007	0	0.390878	0	0.500548	0	0.764856	0		NA	0	0	NA	0	0	0	0		NA	0	NA	0	0
AC205008.4_FG002	0	0	0	0.624045	0		0.491017	0		0			0.00340132	1	0.145379	0	0.273893	0	0.164866	0	0.0545936	0	0.581369	0		0.684115	0	0	0.653646	0	0	0	0		0.253162	0	0.2672	0	0
AC205012.3_FG002	4	4	4	0.457264	0		0.669586	0		0			0.222909	0	0.444258	0	0.435699	0	0.209195	0	0.434027	0	0.656982	0		NA	0	0	NA	0	0	0	0		NA	0	NA	0	0
AC205026.3_FG003	0	0	0	0.367299	0		0.599282	0		0			0.00869858	1	0.0799056	0	0.277691	0	0.311182	0	0.0760283	0	0.442828	0		NA	0	0	NA	0	0	0	0		NA	0	NA	0	0
AC205033.4_FG004	0	0	0	0.300106	0		0.695767	0		0			0.049546	1	0.127029	0	0.278961	0	0.389431	0	0.252252	0	0.502801	0		NA	0	0	NA	0	0	0	0		NA	0	NA	0	0
AC205035.3_FG004	2	0		0.654552	0		0.414755	0		0			0.00421189	1	0.227415	0	0.387887	0	0.0961673	0	0.0212141	1	0.545615	0		NA	0	0	NA	0	0	0	0		NA	0	NA	0	0
AC205057.3_FG002	2	2	2	0.415876	0		0.180682	0		0			6.73896e-05	1	0.0108189	1	0.000591449	1	0.184101	0	0.44618	0	0.620759	0		0.510427	0	0	0.678263	0	0	0	0		0.359888	0	0.253634	0	0
AC205057.3_FG004	0	0	0	0.660904	0		0.674411	0		0			0.026729	1	0.341343	0	0.256132	0	0.194394	0	0.232184	0	0.766456	0		0.130412	0	0	0.0828443	0	0	0	0		0.0522103	0	0.014611	1	0
AC205060.2_FG002	NA	NA	NA	NA	0		NA	0		0			NA	0	NA	0	NA	0	NA	0	NA	0	NA	0		NA	0	0	NA	0	0	0	0		NA	0	NA	0	0
AC205066.3_FG008	NA	NA	NA	NA	0		NA	0		0			NA	0	NA	0	NA	0	NA	0	NA	0	NA	0		NA	0	0	NA	0	0	0	0		NA	0	NA	0	0
AC205077.3_FG003	4	4	4	0.492936	0		0.661719	0		0			0.113751	0	0.55521	0	0.289791	0	0.163928	0	0.427136	0	0.612313	0		NA	0	0	NA	0	0	0	0		NA	0	NA	0	0
AC205078.3_FG009	NA	NA	NA	NA	0		NA	0		0			NA	0	NA	0	NA	0	NA	0	NA	0	NA	0		NA	0	0	NA	0	0	0	0		NA	0	NA	0	0
AC205100.3_FG001	0	0	0	0.614103	0		0.650609	0		0			0.0258533	1	0.401209	0	0.187033	0	0.141129	0	0.292969	0	0.700852	0		NA	0	0	NA	0	0	0	0		NA	0	NA	0	0
AC205104.3_FG003	NA	NA	NA	NA	0		NA	0		0			NA	0	NA	0	NA	0	NA	0	NA	0	NA	0		NA	0	0	NA	0	0	0	0		NA	0	NA	0	0
AC205106.3_FG004	NA	NA	NA	NA	0		NA	0		0			NA	0	NA	0	NA	0	NA	0	NA	0	NA	0		NA	0	0	NA	0	0	0	0		NA	0	NA	0	0
AC205110.4_FG001	NA	NA	NA	NA	0		NA	0		0			NA	0	NA	0	NA	0	NA	0	NA	0	NA	0		NA	0	0	NA	0	0	0	0		NA	0	NA	0	0
AC205122.4_FG003	4	4	4	0.600572	0		0.613341	0		0			0.174691	0	0.567397	0	0.288748	0	0.291622	0	0.51225	0	0.658102	0		0.540366	0	0	0.64728	0	0	0	0		0.0100509	1	0.237976	0	0
AC205122.4_FG005	0	0	0	0.613451	0		0.558958	0		0			0.0252148	1	0.215932	0	0.090333	0	0.272365	0	0.429971	0	0.721454	0		NA	0	0	NA	0	0	0	0		NA	0	NA	0	0
AC205122.4_FG006	NA	NA	NA	NA	0		NA	0		0			NA	0	NA	0	NA	0	NA	0	NA	0	NA	0		NA	0	0	NA	0	0	0	0		NA	0	NA	0	0
AC205122.4_FG007	3	0		0.425462	0		0.0423478	1	3	0			0.0204012	1	0.498374	0	0.194665	0	0.0723165	0	0.00648376	1	0.434092	0		NA	0	0	NA	0	0	0	0		NA	0	NA	0	0
AC205122.4_FG008	4	4	4	0.511984	0		0.503265	0		0			0.227491	0	0.489796	0	0.327548	0	0.250376	0	0.28026	0	0.762744	0		NA	0	0	NA	0	0	0	0		NA	0	NA	0	0
AC205122.4_FG009	4	4	4	0.1796	0		0.3684	0		0			0.29582	0	0.170008	0	0.204361	0	0.0961117	0	0.24246	0	0.684777	0		0.669253	0	0	0.716726	0	0	0	0		0.265943	0	0.333007	0	0
AC205122.4_FG010	1	2		0.352517	0		0.653268	0		0			7.03632e-10	1	3.59404e-06	1	0.000191737	1	0.0620719	0	0.00556154	1	0.469642	0		0.753941	0	0	0.686869	0	0	0	0		0.0442596	1	0.0182713	1	1
AC205154.3_FG001	NA	NA	NA	NA	0		NA	0		0			NA	0	NA	0	NA	0	NA	0	NA	0	NA	0		NA	0	0	NA	0	0	0	0		NA	0	NA	0	0
AC205154.3_FG005	3	3	3	2.97641e-06	1	3	5.90096e-06	1	3	1	3		2.38898e-22	1	0.435274	0	0.278677	0	2.65617e-19	1	9.51067e-19	1	0.761997	0		NA	0	0	NA	0	0	0	0		NA	0	NA	0	0
AC205155.3_FG001	NA	NA	NA	NA	0		NA	0		0			NA	0	NA	0	NA	0	NA	0	NA	0	NA	0		NA	0	0	NA	0	0	0	0		NA	0	NA	0	0
AC205158.3_FG004	NA	NA	NA	NA	0		NA	0		0			NA	0	NA	0	NA	0	NA	0	NA	0	NA	0		NA	0	0	NA	0	0	0	0		NA	0	NA	0	0
AC205165.3_FG002	NA	NA	NA	NA	0		NA	0		0			NA	0	NA	0	NA	0	NA	0	NA	0	NA	0		NA	0	0	NA	0	0	0	0		NA	0	NA	0	0
AC205171.3_FG001	NA	NA	NA	NA	0		NA	0		0			NA	0	NA	0	NA	0	NA	0	NA	0	NA	0		NA	0	0	NA	0	0	0	0		NA	0	NA	0	0
AC205173.3_FG001	NA	NA	NA	NA	0		NA	0		0			NA	0	NA	0	NA	0	NA	0	NA	0	NA	0		NA	0	0	NA	0	0	0	0		NA	0	NA	0	0
AC205175.3_FG001	NA	NA	NA	NA	0		NA	0		0			NA	0	NA	0	NA	0	NA	0	NA	0	NA	0		NA	0	0	NA	0	0	0	0		NA	0	NA	0	0
AC205175.3_FG002	NA	NA	NA	NA	0		NA	0		0			NA	0	NA	0	NA	0	NA	0	NA	0	NA	0		NA	0	0	NA	0	0	0	0		NA	0	NA	0	0
AC205250.3_FG004	4	4	4	0.452901	0		0.610959	0		0			0.295368	0	0.384848	0	0.37087	0	0.249702	0	0.427753	0	0.704132	0		NA	0	0	NA	0	0	0	0		NA	0	NA	0	0
AC205250.3_FG006	1	1	1	0.358207	0		0.278243	0		0			1.69916e-12	1	0.011237	1	0.0143973	1	3.26264e-05	1	1.16048e-05	1	0.725951	0		0.743496	0	0	0.724954	0	0	0	0		0.00901465	1	0.0135108	1	1
AC205251.3_FG002	NA	NA	NA	NA	0		NA	0		0			NA	0	NA	0	NA	0	NA	0	NA	0	NA	0		NA	0	0	NA	0	0	0	0		NA	0	NA	0	0
AC205269.3_FG003	NA	NA	NA	NA	0		NA	0		0			NA	0	NA	0	NA	0	NA	0	NA	0	NA	0		NA	0	0	NA	0	0	0	0		NA	0	NA	0	0
AC205274.3_FG001	2	2	2	0.00257501	1	2	0.00463649	1	2	1	2		6.26756e-15	1	0.566276	0	0.0516601	0	1.40228e-14	1	3.56414e-06	1	0.289705	0		0.0187622	1	1	0.0620794	0	0	0	0		0.339936	0	0.404965	0	0
AC205320.3_FG004	2	0		0.242804	0		0.02631	1	2	0			0.0392034	1	0.0514279	0	0.00166032	1	0.312029	0	0.114803	0	0.524728	0		0.325166	0	0	0.752094	0	0	0	0		0.00628904	1	0.242335	0	0
AC205324.3_FG003	NA	NA	NA	NA	0		NA	0		0			NA	0	NA	0	NA	0	NA	0	NA	0	NA	0		NA	0	0	NA	0	0	0	0		NA	0	NA	0	0
AC205326.3_FG002	4	4	4	0.545565	0		0.377291	0		0			0.0644003	0	0.524996	0	0.0792467	0	0.159871	0	0.441608	0	0.41529	0		NA	0	0	NA	0	0	0	0		NA	0	NA	0	0
AC205331.3_FG004	3	3	3	0.228776	0		0.303	0		0			0.000555178	1	0.017321	1	0.0140802	1	0.20934	0	0.224922	0	0.75629	0		NA	0	0	NA	0	0	0	0		NA	0	NA	0	0
AC205336.3_FG003	NA	NA	NA	NA	0		NA	0		0			NA	0	NA	0	NA	0	NA	0	NA	0	NA	0		NA	0	0	NA	0	0	0	0		NA	0	NA	0	0
AC205345.3_FG002	NA	NA	NA	NA	0		NA	0		0			NA	0	NA	0	NA	0	NA	0	NA	0	NA	0		NA	0	0	NA	0	0	0	0		NA	0	NA	0	0
AC205362.4_FG002	1	3		0.582649	0		0.674192	0		0			1.26867e-06	1	0.0642107	0	0.0258064	1	0.00877877	1	0.0215966	1	0.746474	0		0.0446831	1	0	0.276535	0	0	0	0		0.21841	0	0.0181595	1	0
AC205369.3_FG001	NA	NA	NA	NA	0		NA	0		0			NA	0	NA	0	NA	0	NA	0	NA	0	NA	0		NA	0	0	NA	0	0	0	0		NA	0	NA	0	0
AC205376.4_FG003	NA	NA	NA	NA	0		NA	0		0			NA	0	NA	0	NA	0	NA	0	NA	0	NA	0		NA	0	0	NA	0	0	0	0		NA	0	NA	0	0
AC205376.4_FG008	1	1	1	0.382913	0		0.673845	0		0			4.66654e-08	1	0.00150923	1	0.00971157	1	0.040752	1	0.00847776	1	0.604431	0		0.361585	0	0	0.507078	0	0	0	0		0.207479	0	0.0100734	1	0
AC205379.3_FG012	NA	NA	NA	NA	0		NA	0		0			NA	0	NA	0	NA	0	NA	0	NA	0	NA	0		NA	0	0	NA	0	0	0	0		NA	0	NA	0	0
AC205395.3_FG003	NA	NA	NA	NA	0		NA	0		0			NA	0	NA	0	NA	0	NA	0	NA	0	NA	0		NA	0	0	NA	0	0	0	0		NA	0	NA	0	0
AC205405.3_FG001	NA	NA	NA	NA	0		NA	0		0			NA	0	NA	0	NA	0	NA	0	NA	0	NA	0		NA	0	0	NA	0	0	0	0		NA	0	NA	0	0
AC205411.3_FG001	NA	NA	NA	NA	0		NA	0		0			NA	0	NA	0	NA	0	NA	0	NA	0	NA	0		NA	0	0	NA	0	0	0	0		NA	0	NA	0	0
AC205413.4_FG001	4	4	4	0.437497	0		0.599085	0		0			0.276155	0	0.356275	0	0.341821	0	0.26241	0	0.435416	0	0.713388	0		0.700177	0	0	0.649639	0	0	0	0		0.00171763	1	0.00345197	1	1
AC205413.4_FG002	NA	NA	NA	NA	0		NA	0		0			NA	0	NA	0	NA	0	NA	0	NA	0	NA	0		NA	0	0	NA	0	0	0	0		NA	0	NA	0	0
AC205413.4_FG003	NA	NA	NA	NA	0		NA	0		0			NA	0	NA	0	NA	0	NA	0	NA	0	NA	0		NA	0	0	NA	0	0	0	0		NA	0	NA	0	0
AC205417.3_FG003	NA	NA	NA	NA	0		NA	0		0			NA	0	NA	0	NA	0	NA	0	NA	0	NA	0		NA	0	0	NA	0	0	0	0		NA	0	NA	0	0
AC205419.3_FG001	4	4	4	0.656515	0		0.464351	0		0			0.0557739	0	0.398206	0	0.438438	0	0.243371	0	0.127928	0	0.621959	0		0.184001	0	0	0.382111	0	0	0	0		9.3113e-27	1	3.9837e-20	1	1
AC205425.3_FG006	NA	NA	NA	NA	0		NA	0		0			NA	0	NA	0	NA	0	NA	0	NA	0	NA	0		NA	0	0	NA	0	0	0	0		NA	0	NA	0	0
AC205466.3_FG003	NA	NA	NA	NA	0		NA	0		0			NA	0	NA	0	NA	0	NA	0	NA	0	NA	0		NA	0	0	NA	0	0	0	0		NA	0	NA	0	0
AC205470.3_FG008	NA	NA	NA	NA	0		NA	0		0			NA	0	NA	0	NA	0	NA	0	NA	0	NA	0		NA	0	0	NA	0	0	0	0		NA	0	NA	0	0
AC205471.4_FG003	2	2	2	0.00640927	1	2	0.00261885	1	2	1	2		0.00294014	1	0.148398	0	0.0652291	0	3.09305e-05	1	1.39567e-05	1	0.743587	0		0.536798	0	0	0.432476	0	0	0	0		0.332063	0	0.03245	1	0
AC205471.4_FG007	8	8	8	0.0209346	1	8	4.67725e-05	1	8	1	8		0.229928	0	0.0155031	1	6.16557e-05	1	0.0200256	1	0.000322813	1	0.414831	0		0.491135	0	0	0.740985	0	0	0	0		0.333122	0	0.0643416	0	0
AC205471.4_FG008	0	0	0	0.499001	0		0.599255	0		0			0.026981	1	0.184329	0	0.332709	0	0.312483	0	0.137918	0	0.552571	0		NA	0	0	NA	0	0	0	0		NA	0	NA	0	0
AC205476.3_FG007	NA	NA	NA	NA	0		NA	0		0			NA	0	NA	0	NA	0	NA	0	NA	0	NA	0		NA	0	0	NA	0	0	0	0		NA	0	NA	0	0
AC205484.3_FG005	1	1	1	0.598231	0		0.590892	0		0			3.88461e-07	1	0.0225568	1	0.00951043	1	0.00429207	1	0.00853813	1	0.759259	0		NA	0	0	NA	0	0	0	0		NA	0	NA	0	0
AC205485.3_FG011	NA	NA	NA	NA	0		NA	0		0			NA	0	NA	0	NA	0	NA	0	NA	0	NA	0		NA	0	0	NA	0	0	0	0		NA	0	NA	0	0
AC205490.4_FG004	4	4	4	0.543369	0		0.597573	0		0			0.114545	0	0.332225	0	0.241252	0	0.403531	0	0.475194	0	0.770243	0		NA	0	0	NA	0	0	0	0		NA	0	NA	0	0
AC205496.3_FG002	NA	NA	NA	NA	0		NA	0		0			NA	0	NA	0	NA	0	NA	0	NA	0	NA	0		NA	0	0	NA	0	0	0	0		NA	0	NA	0	0
AC205500.3_FG002	4	4	4	0.570951	0		0.529145	0		0			0.26371	0	0.519597	0	0.326425	0	0.325117	0	0.332562	0	0.73686	0		NA	0	0	NA	0	0	0	0		NA	0	NA	0	0
AC205502.4_FG004	3	2		0.216113	0		0.597093	0		0			0.000115961	1	0.00241199	1	0.107419	0	0.337289	0	0.0359863	1	0.312914	0		0.704504	0	0	0.625552	0	0	0	0		0.0321055	1	0.000539868	1	1
AC205511.3_FG002	1	3		0.00203198	1	3	0.140208	0		0			2.60768e-07	1	2.3379e-05	1	0.00058817	1	0.0890821	0	0.000540065	1	0.216678	0		0.618736	0	0	0.67254	0	0	0	0		0.0321055	1	0.0269265	1	1
AC205513.3_FG003	4	4	4	0.631202	0		0.697776	0		0			0.255948	0	0.519332	0	0.425427	0	0.422957	0	0.489078	0	0.760692	0		NA	0	0	NA	0	0	0	0		NA	0	NA	0	0
AC205521.3_FG003	4	0		0.0569713	0		0.359679	0		0			0.0767019	0	0.17418	0	0.350337	0	0.0067797	1	0.0965835	0	0.539001	0		0.73954	0	0	0.727757	0	0	0	0		0.000656379	1	0.000530856	1	1
AC205532.3_FG001	NA	NA	NA	NA	0		NA	0		0			NA	0	NA	0	NA	0	NA	0	NA	0	NA	0		NA	0	0	NA	0	0	0	0		NA	0	NA	0	0
AC205534.3_FG001	NA	NA	NA	NA	0		NA	0		0			NA	0	NA	0	NA	0	NA	0	NA	0	NA	0		NA	0	0	NA	0	0	0	0		NA	0	NA	0	0
AC205534.3_FG002	0	0	0	0.446382	0		0.587098	0		0			0.0156798	1	0.424202	0	0.22582	0	0.0789329	0	0.161053	0	0.721812	0		NA	0	0	NA	0	0	0	0		NA	0	NA	0	0
AC205544.3_FG004	0	3		0.00371579	1	3	0.69348	0		0			0.00630257	1	0.000209623	1	0.170259	0	0.0815758	0	0.161556	0	0.0639907	0		NA	0	0	NA	0	0	0	0		NA	0	NA	0	0
AC205558.3_FG002	3	1		0.0665766	0		0.00249238	1	3	0			7.21396e-08	1	0.00569859	1	0.0811544	0	0.000131864	1	9.25921e-06	1	0.415299	0		NA	0	0	NA	0	0	0	0		NA	0	NA	0	0
AC205560.3_FG003	NA	NA	NA	NA	0		NA	0		0			NA	0	NA	0	NA	0	NA	0	NA	0	NA	0		NA	0	0	NA	0	0	0	0		NA	0	NA	0	0
AC205562.3_FG002	2	2	2	0.631084	0		0.533591	0		0			9.58931e-05	1	0.129696	0	0.159081	0	0.0317483	1	0.0153192	1	0.693074	0		0.420349	0	0	0.271388	0	0	0	0		0.352186	0	0.278554	0	0
AC205567.3_FG002	3	1		0.126553	0		0.00809393	1	3	0			7.09851e-05	1	0.00677603	1	0.000523028	1	0.00683322	1	0.314994	0	0.254549	0		NA	0	0	NA	0	0	0	0		NA	0	NA	0	0
AC205574.3_FG006	4	4	4	0.585456	0		0.647136	0		0			0.193241	0	0.428677	0	0.437474	0	0.423707	0	0.389705	0	0.675125	0		0.519665	0	0	0.545326	0	0	0	0		0.193918	0	0.227397	0	0
AC205591.4_FG006	NA	NA	NA	NA	0		NA	0		0			NA	0	NA	0	NA	0	NA	0	NA	0	NA	0		NA	0	0	NA	0	0	0	0		NA	0	NA	0	0
AC205592.3_FG001	4	4	4	0.114244	0		0.564314	0		0			0.247629	0	0.106826	0	0.360138	0	0.0889981	0	0.345351	0	0.234444	0		NA	0	0	NA	0	0	0	0		NA	0	NA	0	0
AC205595.3_FG007	NA	NA	NA	NA	0		NA	0		0			NA	0	NA	0	NA	0	NA	0	NA	0	NA	0		NA	0	0	NA	0	0	0	0		NA	0	NA	0	0
AC205605.3_FG002	NA	NA	NA	NA	0		NA	0		0			NA	0	NA	0	NA	0	NA	0	NA	0	NA	0		NA	0	0	NA	0	0	0	0		NA	0	NA	0	0
AC205608.4_FG004	4	4	4	0.600725	0		0.232789	0		0			0.211203	0	0.575162	0	0.167335	0	0.315595	0	0.107202	0	0.508283	0		NA	0	0	NA	0	0	0	0		NA	0	NA	0	0
AC205615.4_FG002	2	0		0.46951	0		0.241542	0		0			0.0264264	1	0.168704	0	0.284175	0	0.330334	0	0.025007	1	0.2501	0		NA	0	0	NA	0	0	0	0		NA	0	NA	0	0
AC205619.3_FG003	NA	NA	NA	NA	0		NA	0		0			NA	0	NA	0	NA	0	NA	0	NA	0	NA	0		NA	0	0	NA	0	0	0	0		NA	0	NA	0	0
AC205664.3_FG001	4	4	4	0.581816	0		0.664764	0		0			0.0819465	0	0.310798	0	0.25271	0	0.367082	0	0.401935	0	0.753581	0		NA	0	0	NA	0	0	0	0		NA	0	NA	0	0
AC205672.3_FG001	NA	NA	NA	NA	0		NA	0		0			NA	0	NA	0	NA	0	NA	0	NA	0	NA	0		NA	0	0	NA	0	0	0	0		NA	0	NA	0	0
AC205673.3_FG006	0	3		0.313306	0		0.40161	0		0			0.0293074	1	0.547752	0	0.447173	0	0.0427789	1	0.0800819	0	0.756995	0		0.484821	0	0	0.34848	0	0	0	0		0.0266514	1	0.00867894	1	1
AC205677.3_FG001	3	0		0.564856	0		0.205761	0		0			0.000367233	1	0.0641165	0	0.00226132	1	0.127185	0	0.467986	0	0.520579	0		NA	0	0	NA	0	0	0	0		NA	0	NA	0	0
AC205695.3_FG008	NA	NA	NA	NA	0		NA	0		0			NA	0	NA	0	NA	0	NA	0	NA	0	NA	0		NA	0	0	NA	0	0	0	0		NA	0	NA	0	0
AC205703.4_FG001	4	4	4	0.406342	0		0.600762	0		0			0.204028	0	0.271922	0	0.422646	0	0.285481	0	0.352515	0	0.479604	0		NA	0	0	NA	0	0	0	0		NA	0	NA	0	0
AC205703.4_FG002	4	4	4	0.663081	0		0.64213	0		0			0.197968	0	0.515085	0	0.330427	0	0.373704	0	0.507755	0	0.744739	0		0.28577	0	0	0.502221	0	0	0	0		0.0590851	0	0.00832817	1	0
AC205703.4_FG005	0	2		0.345336	0		0.672637	0		0			0.0224113	1	0.567391	0	0.243013	0	0.0387999	1	0.22577	0	0.575874	0		NA	0	0	NA	0	0	0	0		NA	0	NA	0	0
AC205703.4_FG006	0	4		0.367299	0		0.106097	0		0			0.116803	0	0.463554	0	0.132771	0	0.103272	0	0.0266524	1	0.582172	0		NA	0	0	NA	0	0	0	0		NA	0	NA	0	0
AC205703.4_FG010	3	2		0.602413	0		0.44271	0		0			2.68146e-05	1	0.116298	0	0.00617463	1	0.0203705	1	0.195304	0	0.52328	0		NA	0	0	NA	0	0	0	0		NA	0	NA	0	0
AC205709.3_FG001	0	0	0	0.44805	0		0.376018	0		0			0.0271445	1	0.166365	0	0.0744783	0	0.322935	0	0.476629	0	0.725932	0		NA	0	0	NA	0	0	0	0		NA	0	NA	0	0
AC205712.3_FG003	3	0		0.531633	0		0.178165	0		0			0.0190004	1	0.106882	0	0.39776	0	0.332262	0	0.039603	1	0.267554	0		NA	0	0	NA	0	0	0	0		NA	0	NA	0	0
AC205713.4_FG004	NA	NA	NA	NA	0		NA	0		0			NA	0	NA	0	NA	0	NA	0	NA	0	NA	0		NA	0	0	NA	0	0	0	0		NA	0	NA	0	0
AC205722.3_FG004	2	0		0.551768	0		0.284082	0		0			0.00747768	1	0.394419	0	0.413958	0	0.0627894	0	0.014376	1	0.583239	0		NA	0	0	NA	0	0	0	0		NA	0	NA	0	0
AC205725.3_FG010	1	1	1	4.50877e-11	1	1	9.74853e-12	1	1	1	1		1.33277e-19	1	0.000759112	1	0.00188587	1	1.08145e-15	1	5.49778e-16	1	0.698662	0		0.689461	0	0	0.653236	0	0	0	0		0.000389523	1	0.000858861	1	1
AC205726.4_FG003	NA	NA	NA	NA	0		NA	0		0			NA	0	NA	0	NA	0	NA	0	NA	0	NA	0		NA	0	0	NA	0	0	0	0		NA	0	NA	0	0
AC205730.3_FG001	4	4	4	0.56109	0		0.424198	0		0			0.0843512	0	0.317516	0	0.364488	0	0.365172	0	0.12184	0	0.459188	0		NA	0	0	NA	0	0	0	0		NA	0	NA	0	0
AC205730.3_FG002	0	0	0	0.539826	0		0.569382	0		0			0.00503534	1	0.118171	0	0.072002	0	0.229875	0	0.302168	0	0.775815	0		NA	0	0	NA	0	0	0	0		NA	0	NA	0	0
AC205735.3_FG006	4	4	4	0.543716	0		0.687185	0		0			0.143385	0	0.571862	0	0.33943	0	0.221559	0	0.426995	0	0.680171	0		NA	0	0	NA	0	0	0	0		NA	0	NA	0	0
AC205813.4_FG008	NA	NA	NA	NA	0		NA	0		0			NA	0	NA	0	NA	0	NA	0	NA	0	NA	0		NA	0	0	NA	0	0	0	0		NA	0	NA	0	0
AC205814.3_FG001	NA	NA	NA	NA	0		NA	0		0			NA	0	NA	0	NA	0	NA	0	NA	0	NA	0		NA	0	0	NA	0	0	0	0		NA	0	NA	0	0
AC205833.3_FG002	NA	NA	NA	NA	0		NA	0		0			NA	0	NA	0	NA	0	NA	0	NA	0	NA	0		NA	0	0	NA	0	0	0	0		NA	0	NA	0	0
AC205834.3_FG003	NA	NA	NA	NA	0		NA	0		0			NA	0	NA	0	NA	0	NA	0	NA	0	NA	0		NA	0	0	NA	0	0	0	0		NA	0	NA	0	0
AC205853.3_FG014	2	0		0.421265	0		0.355423	0		0			0.00750573	1	0.406552	0	0.0151191	1	0.0532218	0	0.513854	0	0.286499	0		NA	0	0	NA	0	0	0	0		NA	0	NA	0	0
AC205886.3_FG001	1	1	1	0.595199	0		0.651748	0		0			3.60648e-07	1	0.00290289	1	0.00216	1	0.0319564	1	0.0385426	1	0.76601	0		NA	0	0	NA	0	0	0	0		NA	0	NA	0	0
AC205888.4_FG004	NA	NA	NA	NA	0		NA	0		0			NA	0	NA	0	NA	0	NA	0	NA	0	NA	0		NA	0	0	NA	0	0	0	0		NA	0	NA	0	0
AC205907.3_FG004	NA	NA	NA	NA	0		NA	0		0			NA	0	NA	0	NA	0	NA	0	NA	0	NA	0		NA	0	0	NA	0	0	0	0		NA	0	NA	0	0
AC205968.3_FG001	NA	NA	NA	NA	0		NA	0		0			NA	0	NA	0	NA	0	NA	0	NA	0	NA	0		NA	0	0	NA	0	0	0	0		NA	0	NA	0	0
AC205972.3_FG002	NA	NA	NA	NA	0		NA	0		0			NA	0	NA	0	NA	0	NA	0	NA	0	NA	0		NA	0	0	NA	0	0	0	0		NA	0	NA	0	0
AC205976.3_FG004	NA	NA	NA	NA	0		NA	0		0			NA	0	NA	0	NA	0	NA	0	NA	0	NA	0		NA	0	0	NA	0	0	0	0		NA	0	NA	0	0
AC205982.3_FG014	1	3		0.108863	0		0.620458	0		0			8.32773e-07	1	0.000108338	1	0.0101146	1	0.2723	0	0.0408795	1	0.40656	0		0.47652	0	0	0.170492	0	0	0	0		0.226806	0	0.0364811	1	0
AC206030.4_FG001	3	3	3	0.19509	0		0.0108684	1	3	0			0.000562656	1	0.484159	0	0.252396	0	0.00428643	1	0.000151478	1	0.492432	0		NA	0	0	NA	0	0	0	0		NA	0	NA	0	0
AC206031.3_FG007	1	3		0.0069369	1	3	0.22785	0		0			1.65162e-10	1	5.58024e-07	1	6.72919e-05	1	0.096049	0	0.00451789	1	0.397313	0		0.517737	0	0	0.658079	0	0	0	0		0.233761	0	0.119828	0	0
AC206156.3_FG003	NA	NA	NA	NA	0		NA	0		0			NA	0	NA	0	NA	0	NA	0	NA	0	NA	0		NA	0	0	NA	0	0	0	0		NA	0	NA	0	0
AC206156.3_FG009	4	4	4	0.630307	0		0.328127	0		0			0.1578	0	0.522746	0	0.273789	0	0.31216	0	0.150104	0	0.55959	0		NA	0	0	NA	0	0	0	0		NA	0	NA	0	0
AC206160.3_FG001	NA	NA	NA	NA	0		NA	0		0			NA	0	NA	0	NA	0	NA	0	NA	0	NA	0		NA	0	0	NA	0	0	0	0		NA	0	NA	0	0
AC206165.3_FG007	7	2		0.0163452	1	2	1.83679e-05	1	7	1			9.61516e-08	1	0.51708	0	0.0354216	1	6.86238e-08	1	8.04651e-12	1	0.299619	0		0.361585	0	0	0.156711	0	0	0	0		0.404823	0	0.0756144	0	0
AC206165.3_FG009	2	2	2	0.0648022	0		0.0990039	0		0			2.1488e-05	1	5.7476e-05	1	6.33468e-05	1	0.383751	0	0.512373	0	0.744544	0		0.750777	0	0	0.184041	0	0	0	0		0.14001	0	0.140852	0	0
AC206165.3_FG019	4	8		0.0270839	1	8	0.607226	0		0			0.266985	0	0.0162506	1	0.34169	0	0.0126053	1	0.449897	0	0.188089	0		NA	0	0	NA	0	0	0	0		NA	0	NA	0	0
AC206166.3_FG002	NA	NA	NA	NA	0		NA	0		0			NA	0	NA	0	NA	0	NA	0	NA	0	NA	0		NA	0	0	NA	0	0	0	0		NA	0	NA	0	0
AC206168.2_FG003	NA	NA	NA	NA	0		NA	0		0			NA	0	NA	0	NA	0	NA	0	NA	0	NA	0		NA	0	0	NA	0	0	0	0		NA	0	NA	0	0
AC206169.3_FG002	NA	NA	NA	NA	0		NA	0		0			NA	0	NA	0	NA	0	NA	0	NA	0	NA	0		NA	0	0	NA	0	0	0	0		NA	0	NA	0	0
AC206184.4_FG002	NA	NA	NA	NA	0		NA	0		0			NA	0	NA	0	NA	0	NA	0	NA	0	NA	0		NA	0	0	NA	0	0	0	0		NA	0	NA	0	0
AC206185.3_FG002	NA	NA	NA	NA	0		NA	0		0			NA	0	NA	0	NA	0	NA	0	NA	0	NA	0		NA	0	0	NA	0	0	0	0		NA	0	NA	0	0
AC206186.3_FG001	NA	NA	NA	NA	0		NA	0		0			NA	0	NA	0	NA	0	NA	0	NA	0	NA	0		NA	0	0	NA	0	0	0	0		NA	0	NA	0	0
AC206194.3_FG003	NA	NA	NA	NA	0		NA	0		0			NA	0	NA	0	NA	0	NA	0	NA	0	NA	0		NA	0	0	NA	0	0	0	0		NA	0	NA	0	0
AC206198.3_FG001	4	4	4	0.526135	0		0.409158	0		0			0.243027	0	0.49671	0	0.263166	0	0.276697	0	0.23699	0	0.701436	0		NA	0	0	NA	0	0	0	0		NA	0	NA	0	0
AC206199.3_FG001	NA	NA	NA	NA	0		NA	0		0			NA	0	NA	0	NA	0	NA	0	NA	0	NA	0		NA	0	0	NA	0	0	0	0		NA	0	NA	0	0
AC206199.3_FG005	NA	NA	NA	NA	0		NA	0		0			NA	0	NA	0	NA	0	NA	0	NA	0	NA	0		NA	0	0	NA	0	0	0	0		NA	0	NA	0	0
AC206201.3_FG004	0	4		0.347714	0		0.138609	0		0			0.104369	0	0.14884	0	0.177295	0	0.31233	0	0.037108	1	0.104325	0		NA	0	0	NA	0	0	0	0		NA	0	NA	0	0
AC206201.3_FG009	NA	NA	NA	NA	0		NA	0		0			NA	0	NA	0	NA	0	NA	0	NA	0	NA	0		NA	0	0	NA	0	0	0	0		NA	0	NA	0	0
AC206217.2_FG006	2	0		0.612703	0		0.274463	0		0			0.00970043	1	0.232878	0	0.305658	0	0.0990684	0	0.0244651	1	0.371257	0		NA	0	0	NA	0	0	0	0		NA	0	NA	0	0
AC206223.3_FG001	4	4	4	0.623677	0		0.385339	0		0			0.0980744	0	0.386565	0	0.345594	0	0.339369	0	0.118967	0	0.499205	0		0.479483	0	0	0.447949	0	0	0	0		0.0492884	1	0.0458154	1	1
AC206223.3_FG004	4	4	4	0.653503	0		0.654691	0		0			0.052645	0	0.407426	0	0.232733	0	0.211313	0	0.340993	0	0.737897	0		NA	0	0	NA	0	0	0	0		NA	0	NA	0	0
AC206223.3_FG006	3	2		0.367781	0		0.558735	0		0			0.000133236	1	0.351938	0	0.0222404	1	0.00567904	1	0.168182	0	0.407591	0		0.156384	0	0	0.606725	0	0	0	0		0.254146	0	0.0955772	0	0
AC206223.3_FG007	2	3		0.32553	0		0.213912	0		0			0.0235616	1	0.576728	0	0.014661	1	0.0438834	1	0.358755	0	0.135026	0		NA	0	0	NA	0	0	0	0		NA	0	NA	0	0
AC206223.3_FG008	2	3		0.177879	0		0.661999	0		0			1.88899e-05	1	0.396105	0	0.0192626	1	0.00074431	1	0.0774166	0	0.347871	0		NA	0	0	NA	0	0	0	0		NA	0	NA	0	0
AC206223.3_FG010	0	0	0	0.560239	0		0.536791	0		0			0.0250915	1	0.436921	0	0.100047	0	0.124367	0	0.431463	0	0.553124	0		NA	0	0	NA	0	0	0	0		NA	0	NA	0	0
AC206227.4_FG001	NA	NA	NA	NA	0		NA	0		0			NA	0	NA	0	NA	0	NA	0	NA	0	NA	0		NA	0	0	NA	0	0	0	0		NA	0	NA	0	0
AC206259.3_FG002	0	0	0	0.626554	0		0.637035	0		0			0.0232972	1	0.282624	0	0.170242	0	0.217701	0	0.301403	0	0.76601	0		NA	0	0	NA	0	0	0	0		NA	0	NA	0	0
AC206259.3_FG003	3	2		0.463047	0		0.110739	0		0			2.91539e-05	1	0.215895	0	0.000226591	1	0.00731974	1	0.469523	0	0.139054	0		0.566245	0	0	0.300602	0	0	0	0		0.352186	0	0.102147	0	0
AC206262.3_FG004	NA	NA	NA	NA	0		NA	0		0			NA	0	NA	0	NA	0	NA	0	NA	0	NA	0		NA	0	0	NA	0	0	0	0		NA	0	NA	0	0
AC206265.3_FG006	NA	NA	NA	NA	0		NA	0		0			NA	0	NA	0	NA	0	NA	0	NA	0	NA	0		NA	0	0	NA	0	0	0	0		NA	0	NA	0	0
AC206266.3_FG001	1	1	1	0.106877	0		0.035411	1	1	0			4.3464e-07	1	0.000767456	1	0.000136507	1	0.00729697	1	0.0382986	1	0.655745	0		NA	0	0	NA	0	0	0	0		NA	0	NA	0	0
AC206273.3_FG004	NA	NA	NA	NA	0		NA	0		0			NA	0	NA	0	NA	0	NA	0	NA	0	NA	0		NA	0	0	NA	0	0	0	0		NA	0	NA	0	0
AC206274.3_FG008	1	1	1	5.26906e-09	1	1	2.98176e-05	1	1	1	1		9.53798e-22	1	2.58096e-15	1	1.23776e-12	1	2.14674e-05	1	5.64444e-11	1	0.173524	0		0.731578	0	0	0.683746	0	0	0	0		0.0269208	1	0.102187	0	0
AC206285.3_FG003	NA	NA	NA	NA	0		NA	0		0			NA	0	NA	0	NA	0	NA	0	NA	0	NA	0		NA	0	0	NA	0	0	0	0		NA	0	NA	0	0
AC206285.3_FG005	3	3	3	0.000267475	1	3	0.000589649	1	3	1	3		2.07587e-07	1	3.27512e-06	1	3.60665e-06	1	0.340247	0	0.337717	0	0.725951	0		0.748391	0	0	0.659321	0	0	0	0		0.0269208	1	0.00611155	1	1
AC206312.3_FG008	NA	NA	NA	NA	0		NA	0		0			NA	0	NA	0	NA	0	NA	0	NA	0	NA	0		NA	0	0	NA	0	0	0	0		NA	0	NA	0	0
AC206319.2_FG004	NA	NA	NA	NA	0		NA	0		0			NA	0	NA	0	NA	0	NA	0	NA	0	NA	0		NA	0	0	NA	0	0	0	0		NA	0	NA	0	0
AC206325.3_FG003	0	0	0	0.634662	0		0.600298	0		0			0.0230087	1	0.29503	0	0.324752	0	0.200372	0	0.135831	0	0.674084	0		NA	0	0	NA	0	0	0	0		NA	0	NA	0	0
AC206332.3_FG005	0	2		0.310995	0		0.647155	0		0			0.00487909	1	0.564355	0	0.202188	0	0.0131123	1	0.110961	0	0.564934	0		NA	0	0	NA	0	0	0	0		NA	0	NA	0	0
AC206349.2_FG002	NA	NA	NA	NA	0		NA	0		0			NA	0	NA	0	NA	0	NA	0	NA	0	NA	0		NA	0	0	NA	0	0	0	0		NA	0	NA	0	0
AC206350.3_FG005	3	3	3	0.228363	0		0.301585	0		0			3.74127e-10	1	0.118727	0	0.059627	0	1.80142e-05	1	4.45058e-05	1	0.762051	0		0.478111	0	0	0.429344	0	0	0	0		1.8166e-10	1	1.00742e-09	1	1
AC206392.3_FG004	NA	NA	NA	NA	0		NA	0		0			NA	0	NA	0	NA	0	NA	0	NA	0	NA	0		NA	0	0	NA	0	0	0	0		NA	0	NA	0	0
AC206425.3_FG002	4	4	4	0.577178	0		0.666443	0		0			0.0595542	0	0.489706	0	0.240315	0	0.179374	0	0.369229	0	0.686923	0		0.61259	0	0	0.310603	0	0	0	0		0.226806	0	0.0445073	1	0
AC206425.3_FG004	NA	NA	NA	NA	0		NA	0		0			NA	0	NA	0	NA	0	NA	0	NA	0	NA	0		NA	0	0	NA	0	0	0	0		NA	0	NA	0	0
AC206503.3_FG001	0	0	0	0.521098	0		0.585426	0		0			0.010608	1	0.170008	0	0.12233	0	0.163501	0	0.188849	0	0.765839	0		NA	0	0	NA	0	0	0	0		NA	0	NA	0	0
AC206514.2_FG002	NA	NA	NA	NA	0		NA	0		0			NA	0	NA	0	NA	0	NA	0	NA	0	NA	0		NA	0	0	NA	0	0	0	0		NA	0	NA	0	0
AC206519.2_FG002	NA	NA	NA	NA	0		NA	0		0			NA	0	NA	0	NA	0	NA	0	NA	0	NA	0		NA	0	0	NA	0	0	0	0		NA	0	NA	0	0
AC206547.2_FG002	NA	NA	NA	NA	0		NA	0		0			NA	0	NA	0	NA	0	NA	0	NA	0	NA	0		NA	0	0	NA	0	0	0	0		NA	0	NA	0	0
AC206582.2_FG002	4	4	4	0.627681	0		0.688634	0		0			0.274097	0	0.52775	0	0.446406	0	0.409779	0	0.489295	0	0.747	0		NA	0	0	NA	0	0	0	0		NA	0	NA	0	0
AC206610.4_FG004	NA	NA	NA	NA	0		NA	0		0			NA	0	NA	0	NA	0	NA	0	NA	0	NA	0		NA	0	0	NA	0	0	0	0		NA	0	NA	0	0
AC206610.4_FG005	4	4	4	0.395346	0		0.682083	0		0			0.191103	0	0.246063	0	0.361516	0	0.268412	0	0.470988	0	0.589029	0		NA	0	0	NA	0	0	0	0		NA	0	NA	0	0
AC206611.3_FG002	NA	NA	NA	NA	0		NA	0		0			NA	0	NA	0	NA	0	NA	0	NA	0	NA	0		NA	0	0	NA	0	0	0	0		NA	0	NA	0	0
AC206611.3_FG003	0	3		0.157226	0		0.469971	0		0			0.0285233	1	0.0464411	1	0.100981	0	0.312138	0	0.428157	0	0.588575	0		NA	0	0	NA	0	0	0	0		NA	0	NA	0	0
AC206634.3_FG004	NA	NA	NA	NA	0		NA	0		0			NA	0	NA	0	NA	0	NA	0	NA	0	NA	0		NA	0	0	NA	0	0	0	0		NA	0	NA	0	0
AC206638.3_FG007	4	4	4	0.38063	0		0.300875	0		0			0.164916	0	0.418175	0	0.219382	0	0.128902	0	0.11004	0	0.72105	0		NA	0	0	NA	0	0	0	0		NA	0	NA	0	0
AC206638.3_FG015	NA	NA	NA	NA	0		NA	0		0			NA	0	NA	0	NA	0	NA	0	NA	0	NA	0		NA	0	0	NA	0	0	0	0		NA	0	NA	0	0
AC206642.4_FG001	4	4	4	0.502567	0		0.358395	0		0			0.155891	0	0.317357	0	0.116872	0	0.384553	0	0.335535	0	0.684777	0		NA	0	0	NA	0	0	0	0		NA	0	NA	0	0
AC206647.3_FG003	NA	NA	NA	NA	0		NA	0		0			NA	0	NA	0	NA	0	NA	0	NA	0	NA	0		NA	0	0	NA	0	0	0	0		NA	0	NA	0	0
AC206655.3_FG004	NA	NA	NA	NA	0		NA	0		0			NA	0	NA	0	NA	0	NA	0	NA	0	NA	0		NA	0	0	NA	0	0	0	0		NA	0	NA	0	0
AC206695.3_FG001	NA	NA	NA	NA	0		NA	0		0			NA	0	NA	0	NA	0	NA	0	NA	0	NA	0		NA	0	0	NA	0	0	0	0		NA	0	NA	0	0
AC206698.2_FG002	NA	NA	NA	NA	0		NA	0		0			NA	0	NA	0	NA	0	NA	0	NA	0	NA	0		NA	0	0	NA	0	0	0	0		NA	0	NA	0	0
AC206700.3_FG003	4	4	4	0.384416	0		0.538313	0		0			0.0557548	0	0.175401	0	0.164027	0	0.42714	0	0.428216	0	0.718836	0		NA	0	0	NA	0	0	0	0		NA	0	NA	0	0
AC206749.3_FG003	NA	NA	NA	NA	0		NA	0		0			NA	0	NA	0	NA	0	NA	0	NA	0	NA	0		NA	0	0	NA	0	0	0	0		NA	0	NA	0	0
AC206763.3_FG002	NA	NA	NA	NA	0		NA	0		0			NA	0	NA	0	NA	0	NA	0	NA	0	NA	0		NA	0	0	NA	0	0	0	0		NA	0	NA	0	0
AC206764.4_FG001	3	2		0.418078	0		0.56995	0		0			0.000154926	1	0.34075	0	0.0300693	1	0.00594108	1	0.126886	0	0.45333	0		NA	0	0	NA	0	0	0	0		NA	0	NA	0	0
AC206764.4_FG003	NA	NA	NA	NA	0		NA	0		0			NA	0	NA	0	NA	0	NA	0	NA	0	NA	0		NA	0	0	NA	0	0	0	0		NA	0	NA	0	0
AC206768.3_FG005	4	4	4	0.409336	0		0.556604	0		0			0.234297	0	0.409685	0	0.369109	0	0.195369	0	0.336077	0	0.723123	0		NA	0	0	NA	0	0	0	0		NA	0	NA	0	0
AC206768.3_FG006	NA	NA	NA	NA	0		NA	0		0			NA	0	NA	0	NA	0	NA	0	NA	0	NA	0		NA	0	0	NA	0	0	0	0		NA	0	NA	0	0
AC206780.3_FG004	4	4	4	0.636354	0		0.338309	0		0			0.113839	0	0.480488	0	0.310862	0	0.285262	0	0.120588	0	0.555826	0		NA	0	0	NA	0	0	0	0		NA	0	NA	0	0
AC206788.3_FG008	3	3	3	0.354334	0		0.227289	0		0			3.16465e-05	1	0.266276	0	0.277443	0	0.00424337	1	0.00159971	1	0.700506	0		0.195031	0	0	0.349314	0	0	0	0		1.36571e-07	1	8.20084e-07	1	1
AC206788.3_FG015	4	0		0.180061	0		0.180915	0		0			0.127939	0	0.283431	0	0.182452	0	0.0398721	1	0.0531009	0	0.773475	0		0.528503	0	0	0.422956	0	0	0	0		0.103908	0	0.0352589	1	0
AC206831.3_FG015	4	4	4	0.593704	0		0.670409	0		0			0.290657	0	0.519101	0	0.428585	0	0.359881	0	0.48131	0	0.756478	0		NA	0	0	NA	0	0	0	0		NA	0	NA	0	0
AC206832.3_FG004	NA	NA	NA	NA	0		NA	0		0			NA	0	NA	0	NA	0	NA	0	NA	0	NA	0		NA	0	0	NA	0	0	0	0		NA	0	NA	0	0
AC206840.3_FG002	4	4	4	0.47582	0		0.667291	0		0			0.222217	0	0.466626	0	0.37087	0	0.223802	0	0.499365	0	0.607103	0		NA	0	0	NA	0	0	0	0		NA	0	NA	0	0
AC206898.3_FG006	0	0	0	0.288983	0		0.615546	0		0			0.0339823	1	0.0709581	0	0.168105	0	0.367697	0	0.368766	0	0.595421	0		NA	0	0	NA	0	0	0	0		NA	0	NA	0	0
AC206901.3_FG005	3	0		0.648265	0		0.35553	0		0			0.00214293	1	0.198761	0	0.36356	0	0.0992201	0	0.0194357	1	0.551456	0		0.608516	0	0	0.564368	0	0	0	0		0.00029478	1	0.000265493	1	1
AC206941.2_FG002	NA	NA	NA	NA	0		NA	0		0			NA	0	NA	0	NA	0	NA	0	NA	0	NA	0		NA	0	0	NA	0	0	0	0		NA	0	NA	0	0
AC206946.2_FG009	NA	NA	NA	NA	0		NA	0		0			NA	0	NA	0	NA	0	NA	0	NA	0	NA	0		NA	0	0	NA	0	0	0	0		NA	0	NA	0	0
AC206951.3_FG014	NA	NA	NA	NA	0		NA	0		0			NA	0	NA	0	NA	0	NA	0	NA	0	NA	0		NA	0	0	NA	0	0	0	0		NA	0	NA	0	0
AC206951.3_FG016	4	4	4	0.421722	0		0.657409	0		0			0.126476	0	0.495692	0	0.385227	0	0.133502	0	0.347188	0	0.64801	0		0.73954	0	0	0.756854	0	0	0	0		0.0267071	1	0.0606992	0	0
AC206951.3_FG017	4	4	4	0.645174	0		0.5719	0		0			0.14425	0	0.453877	0	0.231693	0	0.357283	0	0.49718	0	0.70691	0		0.00364704	1	0	0.0591785	0	0	0	0		0.0330398	1	0.308756	0	0
AC206952.3_FG001	NA	NA	NA	NA	0		NA	0		0			NA	0	NA	0	NA	0	NA	0	NA	0	NA	0		NA	0	0	NA	0	0	0	0		NA	0	NA	0	0
AC206968.3_FG001	NA	NA	NA	NA	0		NA	0		0			NA	0	NA	0	NA	0	NA	0	NA	0	NA	0		NA	0	0	NA	0	0	0	0		NA	0	NA	0	0
AC206968.3_FG003	1	1	1	0.661242	0		0.552947	0		0			1.11134e-15	1	0.000321197	1	2.01663e-05	1	0.000110051	1	0.000993451	1	0.676929	0		NA	0	0	NA	0	0	0	0		NA	0	NA	0	0
AC206969.3_FG001	NA	NA	NA	NA	0		NA	0		0			NA	0	NA	0	NA	0	NA	0	NA	0	NA	0		NA	0	0	NA	0	0	0	0		NA	0	NA	0	0
AC206980.3_FG007	4	4	4	0.414183	0		0.57828	0		0			0.262321	0	0.316342	0	0.311972	0	0.245993	0	0.424863	0	0.702822	0		NA	0	0	NA	0	0	0	0		NA	0	NA	0	0
AC206989.4_FG002	0	0	0	0.602113	0		0.626415	0		0			0.00245163	1	0.267791	0	0.186361	0	0.0703432	0	0.0915808	0	0.774396	0		NA	0	0	NA	0	0	0	0		NA	0	NA	0	0
AC206999.1_FG002	NA	NA	NA	NA	0		NA	0		0			NA	0	NA	0	NA	0	NA	0	NA	0	NA	0		NA	0	0	NA	0	0	0	0		NA	0	NA	0	0
AC206999.1_FG007	NA	NA	NA	NA	0		NA	0		0			NA	0	NA	0	NA	0	NA	0	NA	0	NA	0		NA	0	0	NA	0	0	0	0		NA	0	NA	0	0
AC207011.3_FG001	NA	NA	NA	NA	0		NA	0		0			NA	0	NA	0	NA	0	NA	0	NA	0	NA	0		NA	0	0	NA	0	0	0	0		NA	0	NA	0	0
AC207019.3_FG003	NA	NA	NA	NA	0		NA	0		0			NA	0	NA	0	NA	0	NA	0	NA	0	NA	0		NA	0	0	NA	0	0	0	0		NA	0	NA	0	0
AC207024.3_FG002	4	4	4	0.494366	0		0.603631	0		0			0.102294	0	0.279616	0	0.421299	0	0.429082	0	0.255719	0	0.556421	0		NA	0	0	NA	0	0	0	0		NA	0	NA	0	0
AC207043.3_FG002	4	4	4	0.636271	0		0.58744	0		0			0.196693	0	0.548829	0	0.41578	0	0.338849	0	0.333724	0	0.723919	0		0.488583	0	0	0.645141	0	0	0	0		0.222182	0	0.158972	0	0
AC207043.3_FG004	NA	NA	NA	NA	0		NA	0		0			NA	0	NA	0	NA	0	NA	0	NA	0	NA	0		NA	0	0	NA	0	0	0	0		NA	0	NA	0	0
AC207080.3_FG005	NA	NA	NA	NA	0		NA	0		0			NA	0	NA	0	NA	0	NA	0	NA	0	NA	0		NA	0	0	NA	0	0	0	0		NA	0	NA	0	0
AC207104.3_FG001	NA	NA	NA	NA	0		NA	0		0			NA	0	NA	0	NA	0	NA	0	NA	0	NA	0		NA	0	0	NA	0	0	0	0		NA	0	NA	0	0
AC207107.4_FG001	NA	NA	NA	NA	0		NA	0		0			NA	0	NA	0	NA	0	NA	0	NA	0	NA	0		NA	0	0	NA	0	0	0	0		NA	0	NA	0	0
AC207107.4_FG002	4	4	4	0.388662	0		0.496407	0		0			0.0884596	0	0.483373	0	0.41575	0	0.0910048	0	0.163667	0	0.740079	0		NA	0	0	NA	0	0	0	0		NA	0	NA	0	0
AC207119.3_FG001	NA	NA	NA	NA	0		NA	0		0			NA	0	NA	0	NA	0	NA	0	NA	0	NA	0		NA	0	0	NA	0	0	0	0		NA	0	NA	0	0
AC207188.3_FG002	4	4	4	0.486999	0		0.499935	0		0			0.225302	0	0.363768	0	0.237245	0	0.333249	0	0.392222	0	0.769075	0		NA	0	0	NA	0	0	0	0		NA	0	NA	0	0
AC207189.4_FG002	0	2		0.559912	0		0.675758	0		0			0.000975001	1	0.282901	0	0.131399	0	0.0214293	1	0.0545813	0	0.723017	0		0.444067	0	0	0.284089	0	0	0	0		0.404823	0	0.333007	0	0
AC207205.3_FG004	4	4	4	0.616821	0		0.666476	0		0			0.0921447	0	0.468298	0	0.254725	0	0.25295	0	0.414985	0	0.718	0		NA	0	0	NA	0	0	0	0		NA	0	NA	0	0
AC207206.3_FG001	NA	NA	NA	NA	0		NA	0		0			NA	0	NA	0	NA	0	NA	0	NA	0	NA	0		NA	0	0	NA	0	0	0	0		NA	0	NA	0	0
AC207206.3_FG003	NA	NA	NA	NA	0		NA	0		0			NA	0	NA	0	NA	0	NA	0	NA	0	NA	0		NA	0	0	NA	0	0	0	0		NA	0	NA	0	0
AC207225.3_FG001	NA	NA	NA	NA	0		NA	0		0			NA	0	NA	0	NA	0	NA	0	NA	0	NA	0		NA	0	0	NA	0	0	0	0		NA	0	NA	0	0
AC207225.3_FG003	4	4	4	0.402622	0		0.6104	0		0			0.28887	0	0.338892	0	0.361994	0	0.235299	0	0.439594	0	0.677658	0		NA	0	0	NA	0	0	0	0		NA	0	NA	0	0
AC207231.3_FG001	NA	NA	NA	NA	0		NA	0		0			NA	0	NA	0	NA	0	NA	0	NA	0	NA	0		NA	0	0	NA	0	0	0	0		NA	0	NA	0	0
AC207254.3_FG005	NA	NA	NA	NA	0		NA	0		0			NA	0	NA	0	NA	0	NA	0	NA	0	NA	0		NA	0	0	NA	0	0	0	0		NA	0	NA	0	0
AC207260.3_FG003	3	3	3	0.0647992	0		0.0565403	0		0			0.0035939	1	0.566276	0	0.416654	0	0.0077666	1	0.0100066	1	0.76601	0		NA	0	0	NA	0	0	0	0		NA	0	NA	0	0
AC207260.3_FG004	4	4	4	0.372798	0		0.288841	0		0			0.288267	0	0.318411	0	0.147003	0	0.190224	0	0.167222	0	0.720238	0		NA	0	0	NA	0	0	0	0		NA	0	NA	0	0
AC207265.3_FG002	2	3		0.35017	0		0.344088	0		0			0.00499381	1	0.516867	0	0.0191482	1	0.0215676	1	0.478445	0	0.23285	0		0.218095	0	0	0.221242	0	0	0	0		0.050777	0	0.0664925	0	0
AC207309.3_FG007	8	4		0.663509	0		0.000171548	1	8	0			0.0585978	0	0.396155	0	0.00327014	1	0.250431	0	1.60474e-05	1	0.00901692	1		NA	0	0	NA	0	0	0	0		NA	0	NA	0	0
AC207309.3_FG010	NA	NA	NA	NA	0		NA	0		0			NA	0	NA	0	NA	0	NA	0	NA	0	NA	0		NA	0	0	NA	0	0	0	0		NA	0	NA	0	0
AC207321.3_FG003	NA	NA	NA	NA	0		NA	0		0			NA	0	NA	0	NA	0	NA	0	NA	0	NA	0		NA	0	0	NA	0	0	0	0		NA	0	NA	0	0
AC207328.3_FG003	4	4	4	0.362539	0		0.695422	0		0			0.0604961	0	0.153197	0	0.283686	0	0.397636	0	0.301522	0	0.561338	0		NA	0	0	NA	0	0	0	0		NA	0	NA	0	0
AC207342.3_FG001	NA	NA	NA	NA	0		NA	0		0			NA	0	NA	0	NA	0	NA	0	NA	0	NA	0		NA	0	0	NA	0	0	0	0		NA	0	NA	0	0
AC207342.3_FG007	0	0	0	0.64105	0		0.691602	0		0			0.0191005	1	0.274465	0	0.213839	0	0.210742	0	0.23652	0	0.762437	0		0.685856	0	0	0.20086	0	0	0	0		0.028301	1	0.128144	0	0
AC207342.3_FG008	2	3		0.611408	0		0.18812	0		0			0.000179066	1	0.15113	0	0.00132333	1	0.0387425	1	0.461881	0	0.327568	0		0.632108	0	0	0.403972	0	0	0	0		0.00713915	1	0.000107268	1	1
AC207347.3_FG005	1	1	1	0.570251	0		0.69456	0		0			1.24502e-12	1	0.000444204	1	0.000925074	1	0.00202321	1	0.000861761	1	0.718838	0		0.348011	0	0	0.412365	0	0	0	0		0.127983	0	0.179131	0	0
AC207383.3_FG003	3	0		0.364584	0		0.245863	0		0			0.00772705	1	0.0838299	0	0.028194	1	0.270538	0	0.453383	0	0.700838	0		NA	0	0	NA	0	0	0	0		NA	0	NA	0	0
AC207389.3_FG004	NA	NA	NA	NA	0		NA	0		0			NA	0	NA	0	NA	0	NA	0	NA	0	NA	0		NA	0	0	NA	0	0	0	0		NA	0	NA	0	0
AC207397.3_FG001	4	4	4	0.225828	0		0.358792	0		0			0.295766	0	0.21531	0	0.201809	0	0.132794	0	0.248896	0	0.72224	0		NA	0	0	NA	0	0	0	0		NA	0	NA	0	0
AC207427.3_FG005	0	4		0.515122	0		0.0429453	1	0	0			0.0554072	0	0.230893	0	0.00640482	1	0.375509	0	0.159437	0	0.369386	0		NA	0	0	NA	0	0	0	0		NA	0	NA	0	0
AC207454.3_FG004	NA	NA	NA	NA	0		NA	0		0			NA	0	NA	0	NA	0	NA	0	NA	0	NA	0		NA	0	0	NA	0	0	0	0		NA	0	NA	0	0
AC207472.3_FG001	NA	NA	NA	NA	0		NA	0		0			NA	0	NA	0	NA	0	NA	0	NA	0	NA	0		NA	0	0	NA	0	0	0	0		NA	0	NA	0	0
AC207533.2_FG002	2	2	2	0.173641	0		0.207039	0		0			0.0184067	1	0.0176966	1	0.0125593	1	0.285269	0	0.381599	0	0.76601	0		0.462637	0	0	0.390369	0	0	0	0		0.303129	0	0.20716	0	0
AC207544.3_FG011	NA	NA	NA	NA	0		NA	0		0			NA	0	NA	0	NA	0	NA	0	NA	0	NA	0		NA	0	0	NA	0	0	0	0		NA	0	NA	0	0
AC207546.3_FG004	3	0		0.531775	0		0.287912	0		0			0.0029694	1	0.120726	0	0.0207239	1	0.14134	0	0.390592	0	0.614532	0		NA	0	0	NA	0	0	0	0		NA	0	NA	0	0
AC207549.3_FG010	NA	NA	NA	NA	0		NA	0		0			NA	0	NA	0	NA	0	NA	0	NA	0	NA	0		NA	0	0	NA	0	0	0	0		NA	0	NA	0	0
AC207575.3_FG004	NA	NA	NA	NA	0		NA	0		0			NA	0	NA	0	NA	0	NA	0	NA	0	NA	0		NA	0	0	NA	0	0	0	0		NA	0	NA	0	0
AC207619.3_FG001	NA	NA	NA	NA	0		NA	0		0			NA	0	NA	0	NA	0	NA	0	NA	0	NA	0		NA	0	0	NA	0	0	0	0		NA	0	NA	0	0
AC207620.2_FG007	NA	NA	NA	NA	0		NA	0		0			NA	0	NA	0	NA	0	NA	0	NA	0	NA	0		NA	0	0	NA	0	0	0	0		NA	0	NA	0	0
AC207628.4_FG002	NA	NA	NA	NA	0		NA	0		0			NA	0	NA	0	NA	0	NA	0	NA	0	NA	0		NA	0	0	NA	0	0	0	0		NA	0	NA	0	0
AC207628.4_FG003	0	0	0	0.619236	0		0.358394	0		0			0.0300164	1	0.28241	0	0.0507263	0	0.254634	0	0.486772	0	0.589092	0		NA	0	0	NA	0	0	0	0		NA	0	NA	0	0
AC207628.4_FG005	4	4	4	0.476381	0		0.309527	0		0			0.141476	0	0.290604	0	0.0978358	0	0.381992	0	0.322539	0	0.674645	0		NA	0	0	NA	0	0	0	0		NA	0	NA	0	0
AC207628.4_FG009	0	0	0	0.623305	0		0.631562	0		0			0.0379562	1	0.406803	0	0.182714	0	0.186558	0	0.369045	0	0.693919	0		0.0176075	1	0	0.206868	0	0	0	0		1.29374e-07	1	0.000440676	1	1
AC207628.4_FG010	1	1	1	1.79455e-06	1	1	8.63649e-05	1	1	1	1		2.51174e-22	1	3.52924e-10	1	2.89127e-14	1	6.19854e-14	1	2.23899e-12	1	0.472398	0		0.607764	0	0	0.484787	0	0	0	0		8.09754e-06	1	0.000144037	1	1
AC207628.4_FG011	0	0	0	0.51615	0		0.42929	0		0			0.0260246	1	0.173368	0	0.0646629	0	0.338088	0	0.502259	0	0.718838	0		NA	0	0	NA	0	0	0	0		NA	0	NA	0	0
AC207649.3_FG002	NA	NA	NA	NA	0		NA	0		0			NA	0	NA	0	NA	0	NA	0	NA	0	NA	0		NA	0	0	NA	0	0	0	0		NA	0	NA	0	0
AC207652.3_FG001	0	2		0.365252	0		0.633644	0		0			0.00684047	1	0.527381	0	0.112753	0	0.0258705	1	0.258652	0	0.482618	0		0.28014	0	0	0.303585	0	0	0	0		0.231806	0	0.24469	0	0
AC207655.2_FG003	NA	NA	NA	NA	0		NA	0		0			NA	0	NA	0	NA	0	NA	0	NA	0	NA	0		NA	0	0	NA	0	0	0	0		NA	0	NA	0	0
AC207656.3_FG002	0	3		0.106893	0		0.514757	0		0			0.0205334	1	0.356062	0	0.37087	0	0.00580071	1	0.10768	0	0.502783	0		0.710494	0	0	0.713555	0	0	0	0		0.404823	0	0.404965	0	0
AC207722.2_FG009	2	2	2	0.224807	0		0.0444746	1	2	0			3.16864e-05	1	0.46352	0	0.351738	0	0.000432276	1	1.80241e-05	1	0.580363	0		0.383076	0	0	0.624574	0	0	0	0		0.119839	0	0.333007	0	0
AC207728.2_FG003	3	3	3	0.193367	0		0.50228	0		0			1.21473e-05	1	0.0014102	1	0.00866656	1	0.237922	0	0.115239	0	0.609734	0		NA	0	0	NA	0	0	0	0		NA	0	NA	0	0
AC207732.3_FG010	4	4	4	0.526593	0		0.623556	0		0			0.115287	0	0.286524	0	0.238232	0	0.419368	0	0.476145	0	0.742548	0		NA	0	0	NA	0	0	0	0		NA	0	NA	0	0
AC207733.3_FG001	NA	NA	NA	NA	0		NA	0		0			NA	0	NA	0	NA	0	NA	0	NA	0	NA	0		NA	0	0	NA	0	0	0	0		NA	0	NA	0	0
AC207733.3_FG007	NA	NA	NA	NA	0		NA	0		0			NA	0	NA	0	NA	0	NA	0	NA	0	NA	0		NA	0	0	NA	0	0	0	0		NA	0	NA	0	0
AC207740.3_FG005	NA	NA	NA	NA	0		NA	0		0			NA	0	NA	0	NA	0	NA	0	NA	0	NA	0		NA	0	0	NA	0	0	0	0		NA	0	NA	0	0
AC207755.3_FG005	1	1	1	0.656329	0		0.673142	0		0			2.79993e-14	1	0.000264524	1	0.000194148	1	0.000415291	1	0.000422833	1	0.768016	0		0.284981	0	0	0.643924	0	0	0	0		0.0224319	1	0.227397	0	0
AC207756.3_FG001	4	4	4	0.47998	0		0.625218	0		0			0.26711	0	0.433804	0	0.404761	0	0.255793	0	0.423286	0	0.715015	0		NA	0	0	NA	0	0	0	0		NA	0	NA	0	0
AC207767.2_FG001	NA	NA	NA	NA	0		NA	0		0			NA	0	NA	0	NA	0	NA	0	NA	0	NA	0		NA	0	0	NA	0	0	0	0		NA	0	NA	0	0
AC207784.3_FG007	4	4	4	0.52942	0		0.660163	0		0			0.199866	0	0.530194	0	0.427181	0	0.255292	0	0.412995	0	0.720304	0		NA	0	0	NA	0	0	0	0		NA	0	NA	0	0
AC207790.2_FG001	NA	NA	NA	NA	0		NA	0		0			NA	0	NA	0	NA	0	NA	0	NA	0	NA	0		NA	0	0	NA	0	0	0	0		NA	0	NA	0	0
AC207793.3_FG002	3	3	3	0.341527	0		0.187921	0		0			0.000483112	1	0.1128	0	0.16889	0	0.0186704	1	0.0108742	1	0.653305	0		NA	0	0	NA	0	0	0	0		NA	0	NA	0	0
AC207798.2_FG003	2	3		0.384522	0		0.417842	0		0			0.00740899	1	0.508031	0	0.0338935	1	0.0319263	1	0.449979	0	0.310569	0		0.52768	0	0	0.247216	0	0	0	0		0.084037	0	0.337875	0	0
AC207803.3_FG003	NA	NA	NA	NA	0		NA	0		0			NA	0	NA	0	NA	0	NA	0	NA	0	NA	0		NA	0	0	NA	0	0	0	0		NA	0	NA	0	0
AC207814.3_FG002	4	4	4	0.362932	0		0.42239	0		0			0.0590969	0	0.11622	0	0.440479	0	0.333529	0	0.135997	0	0.327568	0		NA	0	0	NA	0	0	0	0		NA	0	NA	0	0
AC207814.3_FG003	1	1	1	0.00155504	1	1	0.00106115	1	1	1	1		3.00229e-11	1	6.60282e-07	1	3.0437e-07	1	3.36656e-06	1	6.27009e-06	1	0.761039	0		0.379739	0	0	0.318504	0	0	0	0		0.103768	0	0.119828	0	0
AC207888.3_FG009	4	4	4	0.475097	0		0.540839	0		0			0.133161	0	0.264149	0	0.193481	0	0.373257	0	0.478811	0	0.765839	0		NA	0	0	NA	0	0	0	0		NA	0	NA	0	0
AC207890.3_FG002	0	2		0.318859	0		0.414395	0		0			0.0215784	1	0.55519	0	0.439464	0	0.0336334	1	0.0677958	0	0.755993	0		NA	0	0	NA	0	0	0	0		NA	0	NA	0	0
AC207896.4_FG003	NA	NA	NA	NA	0		NA	0		0			NA	0	NA	0	NA	0	NA	0	NA	0	NA	0		NA	0	0	NA	0	0	0	0		NA	0	NA	0	0
AC208023.3_FG001	4	4	4	0.599506	0		0.321481	0		0			0.288603	0	0.525911	0	0.1748	0	0.363741	0	0.197972	0	0.576424	0		NA	0	0	NA	0	0	0	0		NA	0	NA	0	0
AC208026.3_FG005	NA	NA	NA	NA	0		NA	0		0			NA	0	NA	0	NA	0	NA	0	NA	0	NA	0		NA	0	0	NA	0	0	0	0		NA	0	NA	0	0
AC208031.3_FG002	2	2	2	0.549206	0		0.518625	0		0			2.02912e-06	1	0.0980347	0	0.0900034	0	0.00578144	1	0.00449197	1	0.746345	0		0.478111	0	0	0.717514	0	0	0	0		0.0662614	0	0.00315124	1	0
AC208031.3_FG005	4	4	4	0.305556	0		0.475188	0		0			0.269917	0	0.277856	0	0.279709	0	0.143707	0	0.291657	0	0.705201	0		NA	0	0	NA	0	0	0	0		NA	0	NA	0	0
AC208035.3_FG002	NA	NA	NA	NA	0		NA	0		0			NA	0	NA	0	NA	0	NA	0	NA	0	NA	0		NA	0	0	NA	0	0	0	0		NA	0	NA	0	0
AC208042.3_FG005	NA	NA	NA	NA	0		NA	0		0			NA	0	NA	0	NA	0	NA	0	NA	0	NA	0		NA	0	0	NA	0	0	0	0		NA	0	NA	0	0
AC208079.3_FG001	NA	NA	NA	NA	0		NA	0		0			NA	0	NA	0	NA	0	NA	0	NA	0	NA	0		NA	0	0	NA	0	0	0	0		NA	0	NA	0	0
AC208082.3_FG008	NA	NA	NA	NA	0		NA	0		0			NA	0	NA	0	NA	0	NA	0	NA	0	NA	0		NA	0	0	NA	0	0	0	0		NA	0	NA	0	0
AC208109.2_FG004	0	0	0	0.55903	0		0.541692	0		0			0.0479882	1	0.504125	0	0.152447	0	0.127146	0	0.424449	0	0.553844	0		NA	0	0	NA	0	0	0	0		NA	0	NA	0	0
AC208110.2_FG001	4	4	4	0.44817	0		0.318553	0		0			0.262387	0	0.356578	0	0.150925	0	0.280032	0	0.232986	0	0.698682	0		NA	0	0	NA	0	0	0	0		NA	0	NA	0	0
AC208110.2_FG005	NA	NA	NA	NA	0		NA	0		0			NA	0	NA	0	NA	0	NA	0	NA	0	NA	0		NA	0	0	NA	0	0	0	0		NA	0	NA	0	0
AC208110.2_FG006	4	4	4	0.115927	0		0.68547	0		0			0.297957	0	0.106525	0	0.437045	0	0.0587563	0	0.500964	0	0.306009	0		NA	0	0	NA	0	0	0	0		NA	0	NA	0	0
AC208110.2_FG007	4	4	4	0.631074	0		0.581854	0		0			0.0753059	0	0.453565	0	0.184709	0	0.240087	0	0.471731	0	0.657668	0		NA	0	0	NA	0	0	0	0		NA	0	NA	0	0
AC208110.2_FG011	4	4	4	0.483338	0		0.475087	0		0			0.264554	0	0.436797	0	0.282224	0	0.252913	0	0.284206	0	0.763253	0		NA	0	0	NA	0	0	0	0		NA	0	NA	0	0
AC208113.3_FG001	NA	NA	NA	NA	0		NA	0		0			NA	0	NA	0	NA	0	NA	0	NA	0	NA	0		NA	0	0	NA	0	0	0	0		NA	0	NA	0	0
AC208113.3_FG005	4	4	4	0.477318	0		0.454361	0		0			0.0827672	0	0.224224	0	0.117582	0	0.421824	0	0.467468	0	0.755892	0		0.559097	0	0	0.678235	0	0	0	0		0.281725	0	0.00689888	1	0
AC208113.3_FG009	1	3		2.49261e-07	1	3	6.02126e-05	1	1	1			1.0033e-10	1	0.432471	0	0.0180855	1	1.2639e-09	1	5.45201e-08	1	0.303028	0		NA	0	0	NA	0	0	0	0		NA	0	NA	0	0
AC208122.2_FG003	NA	NA	NA	NA	0		NA	0		0			NA	0	NA	0	NA	0	NA	0	NA	0	NA	0		NA	0	0	NA	0	0	0	0		NA	0	NA	0	0
AC208126.3_FG001	NA	NA	NA	NA	0		NA	0		0			NA	0	NA	0	NA	0	NA	0	NA	0	NA	0		NA	0	0	NA	0	0	0	0		NA	0	NA	0	0
AC208201.3_FG001	3	0		0.502438	0		0.236641	0		0			0.0085887	1	0.422578	0	0.404761	0	0.0639379	0	0.015743	1	0.604142	0		0.71694	0	0	0.697286	0	0	0	0		0.00352459	1	7.4427e-05	1	1
AC208201.3_FG002	4	4	4	0.409164	0		0.644788	0		0			0.157051	0	0.463795	0	0.418505	0	0.146456	0	0.362086	0	0.653321	0		NA	0	0	NA	0	0	0	0		NA	0	NA	0	0
AC208201.3_FG003	0	3		0.0327512	1	3	0.696534	0		0			0.0158715	1	0.223289	0	0.197954	0	0.00103198	1	0.23735	0	0.184311	0		0.612703	0	0	0.60492	0	0	0	0		0.000495504	1	0.00142952	1	1
AC208204.3_FG006	7	2		7.5467e-08	1	2	1.07605e-10	1	7	1			9.28117e-14	1	0.123503	0	0.0110477	1	7.7914e-19	1	1.73163e-22	1	0.572537	0		NA	0	0	NA	0	0	0	0		NA	0	NA	0	0
AC208212.3_FG001	0	0	0	0.241653	0		0.260579	0		0			0.0411021	1	0.10365	0	0.0655652	0	0.372063	0	0.451751	0	0.778737	0		NA	0	0	NA	0	0	0	0		NA	0	NA	0	0
AC208217.3_FG001	0	0	0	0.236312	0		0.527814	0		0			0.00834878	1	0.0505949	0	0.0899987	0	0.366635	0	0.231477	0	0.606926	0		NA	0	0	NA	0	0	0	0		NA	0	NA	0	0
AC208221.3_FG002	1	1	1	0.00104701	1	1	9.94265e-07	1	1	1	1		4.06998e-42	1	4.12525e-18	1	5.47949e-22	1	3.59713e-27	1	4.69713e-19	1	0.273638	0		0.0690077	0	0	0.0690969	0	0	0	0		5.11661e-12	1	2.66472e-12	1	1
AC208308.3_FG003	NA	NA	NA	NA	0		NA	0		0			NA	0	NA	0	NA	0	NA	0	NA	0	NA	0		NA	0	0	NA	0	0	0	0		NA	0	NA	0	0
AC208308.3_FG004	NA	NA	NA	NA	0		NA	0		0			NA	0	NA	0	NA	0	NA	0	NA	0	NA	0		NA	0	0	NA	0	0	0	0		NA	0	NA	0	0
AC208327.4_FG002	3	3	3	0.0541708	0		0.0796907	0		0			0.00102403	1	0.00936728	1	0.00746561	1	0.258324	0	0.244593	0	0.72542	0		NA	0	0	NA	0	0	0	0		NA	0	NA	0	0
AC208327.4_FG003	1	2		0.189655	0		0.617114	0		0			3.55813e-11	1	0.126122	0	0.00529402	1	2.52391e-06	1	0.000483198	1	0.495915	0		0.733925	0	0	0.48383	0	0	0	0		0.0879153	0	0.333007	0	0
AC208327.4_FG006	8	4		0.550641	0		0.0298359	1	8	0			0.267881	0	0.498815	0	0.0251273	1	0.310035	0	0.0209753	1	0.277237	0		NA	0	0	NA	0	0	0	0		NA	0	NA	0	0
AC208337.2_FG003	4	4	4	0.535407	0		0.567426	0		0			0.271185	0	0.439516	0	0.313321	0	0.337829	0	0.412995	0	0.779293	0		NA	0	0	NA	0	0	0	0		NA	0	NA	0	0
AC208338.3_FG010	NA	NA	NA	NA	0		NA	0		0			NA	0	NA	0	NA	0	NA	0	NA	0	NA	0		NA	0	0	NA	0	0	0	0		NA	0	NA	0	0
AC208341.4_FG005	2	3		0.278062	0		0.548599	0		0			0.00023318	1	0.432435	0	0.0217103	1	0.00401517	1	0.205258	0	0.327223	0		NA	0	0	NA	0	0	0	0		NA	0	NA	0	0
AC208341.4_FG006	3	3	3	0.252814	0		0.117713	0		0			0.0234283	1	0.0478459	1	0.0090262	1	0.364935	0	0.310686	0	0.684777	0		NA	0	0	NA	0	0	0	0		NA	0	NA	0	0
AC208341.4_FG007	NA	NA	NA	NA	0		NA	0		0			NA	0	NA	0	NA	0	NA	0	NA	0	NA	0		NA	0	0	NA	0	0	0	0		NA	0	NA	0	0
AC208341.4_FG008	NA	NA	NA	NA	0		NA	0		0			NA	0	NA	0	NA	0	NA	0	NA	0	NA	0		NA	0	0	NA	0	0	0	0		NA	0	NA	0	0
AC208346.3_FG004	1	1	1	0.567538	0		0.675105	0		0			9.73734e-12	1	0.00434235	1	0.00100725	1	0.000494507	1	0.00156492	1	0.733303	0		0.497135	0	0	0.643924	0	0	0	0		0.00235941	1	0.187898	0	0
AC208348.3_FG012	2	3		0.526638	0		0.497279	0		0			7.31019e-06	1	0.110996	0	0.00410732	1	0.00967366	1	0.150712	0	0.488238	0		NA	0	0	NA	0	0	0	0		NA	0	NA	0	0
AC208358.3_FG005	4	4	4	0.313207	0		0.686668	0		0			0.255789	0	0.228109	0	0.436755	0	0.182634	0	0.476629	0	0.490841	0		NA	0	0	NA	0	0	0	0		NA	0	NA	0	0
AC208406.3_FG004	NA	NA	NA	NA	0		NA	0		0			NA	0	NA	0	NA	0	NA	0	NA	0	NA	0		NA	0	0	NA	0	0	0	0		NA	0	NA	0	0
AC208411.3_FG013	NA	NA	NA	NA	0		NA	0		0			NA	0	NA	0	NA	0	NA	0	NA	0	NA	0		NA	0	0	NA	0	0	0	0		NA	0	NA	0	0
AC208418.3_FG009	NA	NA	NA	NA	0		NA	0		0			NA	0	NA	0	NA	0	NA	0	NA	0	NA	0		NA	0	0	NA	0	0	0	0		NA	0	NA	0	0
AC208422.3_FG001	NA	NA	NA	NA	0		NA	0		0			NA	0	NA	0	NA	0	NA	0	NA	0	NA	0		NA	0	0	NA	0	0	0	0		NA	0	NA	0	0
AC208422.3_FG002	NA	NA	NA	NA	0		NA	0		0			NA	0	NA	0	NA	0	NA	0	NA	0	NA	0		NA	0	0	NA	0	0	0	0		NA	0	NA	0	0
AC208423.3_FG002	NA	NA	NA	NA	0		NA	0		0			NA	0	NA	0	NA	0	NA	0	NA	0	NA	0		NA	0	0	NA	0	0	0	0		NA	0	NA	0	0
AC208434.3_FG001	3	2		0.383262	0		0.0959891	0		0			0.0013891	1	0.0635236	0	0.00911885	1	0.0262385	1	0.295301	0	0.41882	0		NA	0	0	NA	0	0	0	0		NA	0	NA	0	0
AC208434.3_FG007	NA	NA	NA	NA	0		NA	0		0			NA	0	NA	0	NA	0	NA	0	NA	0	NA	0		NA	0	0	NA	0	0	0	0		NA	0	NA	0	0
AC208436.3_FG007	1	2		0.214118	0		0.640909	0		0			2.53918e-06	1	0.368761	0	0.0167661	1	0.000212115	1	0.0395831	1	0.355551	0		0.137088	0	0	0.100586	0	0	0	0		0.135782	0	0.102147	0	0
AC208440.3_FG003	4	4	4	0.472747	0		0.560642	0		0			0.0955093	0	0.55922	0	0.187787	0	0.142267	0	0.502795	0	0.497804	0		0.338885	0	0	0.147279	0	0	0	0		0.01716	1	0.00131882	1	1
AC208445.3_FG001	NA	NA	NA	NA	0		NA	0		0			NA	0	NA	0	NA	0	NA	0	NA	0	NA	0		NA	0	0	NA	0	0	0	0		NA	0	NA	0	0
AC208445.3_FG006	NA	NA	NA	NA	0		NA	0		0			NA	0	NA	0	NA	0	NA	0	NA	0	NA	0		NA	0	0	NA	0	0	0	0		NA	0	NA	0	0
AC208453.3_FG003	NA	NA	NA	NA	0		NA	0		0			NA	0	NA	0	NA	0	NA	0	NA	0	NA	0		NA	0	0	NA	0	0	0	0		NA	0	NA	0	0
AC208454.3_FG002	4	4	4	0.544969	0		0.456037	0		0			0.225168	0	0.519252	0	0.212697	0	0.27448	0	0.362395	0	0.483679	0		NA	0	0	NA	0	0	0	0		NA	0	NA	0	0
AC208458.3_FG011	4	4	4	0.184195	0		0.596894	0		0			0.189728	0	0.198717	0	0.424556	0	0.0510398	0	0.332931	0	0.472076	0		NA	0	0	NA	0	0	0	0		NA	0	NA	0	0
AC208516.2_FG008	NA	NA	NA	NA	0		NA	0		0			NA	0	NA	0	NA	0	NA	0	NA	0	NA	0		NA	0	0	NA	0	0	0	0		NA	0	NA	0	0
AC208521.3_FG002	3	3	3	0.201954	0		0.336698	0		0			0.0147301	1	0.0417941	1	0.044926	1	0.394091	0	0.47675	0	0.720238	0		NA	0	0	NA	0	0	0	0		NA	0	NA	0	0
AC208530.3_FG003	NA	NA	NA	NA	0		NA	0		0			NA	0	NA	0	NA	0	NA	0	NA	0	NA	0		NA	0	0	NA	0	0	0	0		NA	0	NA	0	0
AC208539.3_FG002	NA	NA	NA	NA	0		NA	0		0			NA	0	NA	0	NA	0	NA	0	NA	0	NA	0		NA	0	0	NA	0	0	0	0		NA	0	NA	0	0
AC208539.3_FG003	NA	NA	NA	NA	0		NA	0		0			NA	0	NA	0	NA	0	NA	0	NA	0	NA	0		NA	0	0	NA	0	0	0	0		NA	0	NA	0	0
AC208559.3_FG003	1	1	1	2.49029e-08	1	1	2.21424e-07	1	1	1	1		3.76634e-15	1	1.17849e-11	1	2.80572e-11	1	0.000843553	1	4.59171e-05	1	0.60622	0		0.562779	0	0	0.488427	0	0	0	0		9.20919e-06	1	4.57277e-07	1	1
AC208564.3_FG004	4	4	4	0.387542	0		0.631824	0		0			0.173555	0	0.261061	0	0.310559	0	0.306146	0	0.493866	0	0.652175	0		NA	0	0	NA	0	0	0	0		NA	0	NA	0	0
AC208571.4_FG001	4	4	4	0.522157	0		0.409643	0		0			0.167238	0	0.344391	0	0.306378	0	0.392229	0	0.177995	0	0.412657	0		0.66125	0	0	0.471633	0	0	0	0		0.404823	0	0.173734	0	0
AC208576.3_FG001	4	4	4	0.24809	0		0.577837	0		0			0.295519	0	0.19417	0	0.334029	0	0.120426	0	0.400918	0	0.565272	0		NA	0	0	NA	0	0	0	0		NA	0	NA	0	0
AC208577.3_FG005	NA	NA	NA	NA	0		NA	0		0			NA	0	NA	0	NA	0	NA	0	NA	0	NA	0		NA	0	0	NA	0	0	0	0		NA	0	NA	0	0
AC208579.3_FG001	0	0	0	0.578298	0		0.637526	0		0			0.0133066	1	0.404082	0	0.263195	0	0.0804705	0	0.123329	0	0.765839	0		NA	0	0	NA	0	0	0	0		NA	0	NA	0	0
AC208606.3_FG007	0	0	0	0.572418	0		0.562376	0		0			0.0109887	1	0.402011	0	0.109325	0	0.058091	0	0.244631	0	0.57931	0		0.569072	0	0	0.743619	0	0	0	0		0.222182	0	0.0494793	1	0
AC208610.3_FG010	NA	NA	NA	NA	0		NA	0		0			NA	0	NA	0	NA	0	NA	0	NA	0	NA	0		NA	0	0	NA	0	0	0	0		NA	0	NA	0	0
AC208625.3_FG004	NA	NA	NA	NA	0		NA	0		0			NA	0	NA	0	NA	0	NA	0	NA	0	NA	0		NA	0	0	NA	0	0	0	0		NA	0	NA	0	0
AC208630.3_FG001	NA	NA	NA	NA	0		NA	0		0			NA	0	NA	0	NA	0	NA	0	NA	0	NA	0		NA	0	0	NA	0	0	0	0		NA	0	NA	0	0
AC208641.3_FG009	0	0	0	0.565106	0		0.675093	0		0			0.0415574	1	0.491771	0	0.239943	0	0.122268	0	0.275299	0	0.680173	0		NA	0	0	NA	0	0	0	0		NA	0	NA	0	0
AC208644.2_FG005	NA	NA	NA	NA	0		NA	0		0			NA	0	NA	0	NA	0	NA	0	NA	0	NA	0		NA	0	0	NA	0	0	0	0		NA	0	NA	0	0
AC208649.4_FG003	NA	NA	NA	NA	0		NA	0		0			NA	0	NA	0	NA	0	NA	0	NA	0	NA	0		NA	0	0	NA	0	0	0	0		NA	0	NA	0	0
AC208663.3_FG002	4	4	4	0.617065	0		0.696281	0		0			0.112162	0	0.375909	0	0.310018	0	0.366176	0	0.394746	0	0.748802	0		NA	0	0	NA	0	0	0	0		NA	0	NA	0	0
AC208678.3_FG002	NA	NA	NA	NA	0		NA	0		0			NA	0	NA	0	NA	0	NA	0	NA	0	NA	0		NA	0	0	NA	0	0	0	0		NA	0	NA	0	0
AC208680.3_FG001	NA	NA	NA	NA	0		NA	0		0			NA	0	NA	0	NA	0	NA	0	NA	0	NA	0		NA	0	0	NA	0	0	0	0		NA	0	NA	0	0
AC208702.3_FG007	NA	NA	NA	NA	0		NA	0		0			NA	0	NA	0	NA	0	NA	0	NA	0	NA	0		NA	0	0	NA	0	0	0	0		NA	0	NA	0	0
AC208711.3_FG005	NA	NA	NA	NA	0		NA	0		0			NA	0	NA	0	NA	0	NA	0	NA	0	NA	0		NA	0	0	NA	0	0	0	0		NA	0	NA	0	0
AC208724.3_FG001	4	4	4	0.593081	0		0.527777	0		0			0.135799	0	0.388312	0	0.19466	0	0.397265	0	0.473181	0	0.720238	0		0.251434	0	0	0.638733	0	0	0	0		0.0125008	1	1.61302e-06	1	1
AC208826.3_FG003	NA	NA	NA	NA	0		NA	0		0			NA	0	NA	0	NA	0	NA	0	NA	0	NA	0		NA	0	0	NA	0	0	0	0		NA	0	NA	0	0
AC208826.3_FG004	0	2		0.342563	0		0.628994	0		0			0.0101187	1	0.0352825	1	0.173505	0	0.420188	0	0.170264	0	0.440813	0		NA	0	0	NA	0	0	0	0		NA	0	NA	0	0
AC208848.3_FG005	NA	NA	NA	NA	0		NA	0		0			NA	0	NA	0	NA	0	NA	0	NA	0	NA	0		NA	0	0	NA	0	0	0	0		NA	0	NA	0	0
AC208855.3_FG002	4	4	4	0.416871	0		0.342423	0		0			0.151972	0	0.265106	0	0.128152	0	0.339078	0	0.338581	0	0.725951	0		NA	0	0	NA	0	0	0	0		NA	0	NA	0	0
AC208860.3_FG002	NA	NA	NA	NA	0		NA	0		0			NA	0	NA	0	NA	0	NA	0	NA	0	NA	0		NA	0	0	NA	0	0	0	0		NA	0	NA	0	0
AC208892.3_FG005	3	3	3	0.201648	0		0.177612	0		0			7.37896e-06	1	0.00302927	1	0.00128823	1	0.097255	0	0.153863	0	0.764327	0		0.479483	0	0	0.594455	0	0	0	0		0.250029	0	0.165649	0	0
AC208895.3_FG001	NA	NA	NA	NA	0		NA	0		0			NA	0	NA	0	NA	0	NA	0	NA	0	NA	0		NA	0	0	NA	0	0	0	0		NA	0	NA	0	0
AC208895.3_FG004	NA	NA	NA	NA	0		NA	0		0			NA	0	NA	0	NA	0	NA	0	NA	0	NA	0		NA	0	0	NA	0	0	0	0		NA	0	NA	0	0
AC208897.3_FG003	4	4	4	0.453187	0		0.624775	0		0			0.168631	0	0.491027	0	0.44015	0	0.179213	0	0.351015	0	0.700506	0		0.755723	0	0	0.753848	0	0	0	0		0.0516505	0	0.0240354	1	0
AC208897.3_FG004	1	1	1	0.629359	0		0.628266	0		0			4.77579e-12	1	0.00298329	1	0.00270921	1	0.000651151	1	0.000554714	1	0.762767	0		0.7482	0	0	0.603159	0	0	0	0		2.86728e-09	1	3.631e-11	1	1
AC208905.3_FG004	NA	NA	NA	NA	0		NA	0		0			NA	0	NA	0	NA	0	NA	0	NA	0	NA	0		NA	0	0	NA	0	0	0	0		NA	0	NA	0	0
AC208915.3_FG010	NA	NA	NA	NA	0		NA	0		0			NA	0	NA	0	NA	0	NA	0	NA	0	NA	0		NA	0	0	NA	0	0	0	0		NA	0	NA	0	0
AC208916.3_FG003	4	4	4	0.343914	0		0.529136	0		0			0.23281	0	0.228855	0	0.250945	0	0.209361	0	0.401674	0	0.6821	0		NA	0	0	NA	0	0	0	0		NA	0	NA	0	0
AC208920.3_FG001	NA	NA	NA	NA	0		NA	0		0			NA	0	NA	0	NA	0	NA	0	NA	0	NA	0		NA	0	0	NA	0	0	0	0		NA	0	NA	0	0
AC208930.3_FG007	3	3	3	0.00922924	1	3	0.0184284	1	3	1	3		0.000111824	1	0.0012835	1	0.00122069	1	0.209571	0	0.136448	0	0.66871	0		NA	0	0	NA	0	0	0	0		NA	0	NA	0	0
AC208974.3_FG001	NA	NA	NA	NA	0		NA	0		0			NA	0	NA	0	NA	0	NA	0	NA	0	NA	0		NA	0	0	NA	0	0	0	0		NA	0	NA	0	0
AC209015.3_FG004	NA	NA	NA	NA	0		NA	0		0			NA	0	NA	0	NA	0	NA	0	NA	0	NA	0		NA	0	0	NA	0	0	0	0		NA	0	NA	0	0
AC209016.3_FG010	4	4	4	0.433313	0		0.368084	0		0			0.100545	0	0.515342	0	0.106451	0	0.118172	0	0.409405	0	0.327879	0		NA	0	0	NA	0	0	0	0		NA	0	NA	0	0
AC209029.2_FG002	NA	NA	NA	NA	0		NA	0		0			NA	0	NA	0	NA	0	NA	0	NA	0	NA	0		NA	0	0	NA	0	0	0	0		NA	0	NA	0	0
AC209050.3_FG001	4	4	4	0.294225	0		0.670316	0		0			0.11333	0	0.422292	0	0.350329	0	0.0848556	0	0.35829	0	0.542843	0		NA	0	0	NA	0	0	0	0		NA	0	NA	0	0
AC209050.3_FG003	4	4	4	0.345457	0		0.504962	0		0			0.165871	0	0.403895	0	0.373969	0	0.118794	0	0.244745	0	0.719186	0		0.643096	0	0	0.704442	0	0	0	0		0.0160378	1	0.0358045	1	1
AC209051.3_FG003	0	0	0	0.306948	0		0.620069	0		0			0.0254356	1	0.11731	0	0.179043	0	0.365676	0	0.201115	0	0.57072	0		NA	0	0	NA	0	0	0	0		NA	0	NA	0	0
AC209062.3_FG002	NA	NA	NA	NA	0		NA	0		0			NA	0	NA	0	NA	0	NA	0	NA	0	NA	0		NA	0	0	NA	0	0	0	0		NA	0	NA	0	0
AC209073.3_FG001	NA	NA	NA	NA	0		NA	0		0			NA	0	NA	0	NA	0	NA	0	NA	0	NA	0		NA	0	0	NA	0	0	0	0		NA	0	NA	0	0
AC209073.3_FG002	NA	NA	NA	NA	0		NA	0		0			NA	0	NA	0	NA	0	NA	0	NA	0	NA	0		NA	0	0	NA	0	0	0	0		NA	0	NA	0	0
AC209074.3_FG007	NA	NA	NA	NA	0		NA	0		0			NA	0	NA	0	NA	0	NA	0	NA	0	NA	0		NA	0	0	NA	0	0	0	0		NA	0	NA	0	0
AC209080.3_FG004	2	1		0.532714	0		0.576556	0		0			6.96021e-08	1	0.0169385	1	0.000510608	1	0.00433689	1	0.0564463	0	0.553844	0		NA	0	0	NA	0	0	0	0		NA	0	NA	0	0
AC209093.3_FG006	4	4	4	0.497605	0		0.603928	0		0			0.074785	0	0.21328	0	0.181225	0	0.426925	0	0.462069	0	0.738091	0		NA	0	0	NA	0	0	0	0		NA	0	NA	0	0
AC209168.3_FG007	NA	NA	NA	NA	0		NA	0		0			NA	0	NA	0	NA	0	NA	0	NA	0	NA	0		NA	0	0	NA	0	0	0	0		NA	0	NA	0	0
AC209169.3_FG007	NA	NA	NA	NA	0		NA	0		0			NA	0	NA	0	NA	0	NA	0	NA	0	NA	0		NA	0	0	NA	0	0	0	0		NA	0	NA	0	0
AC209177.3_FG001	NA	NA	NA	NA	0		NA	0		0			NA	0	NA	0	NA	0	NA	0	NA	0	NA	0		NA	0	0	NA	0	0	0	0		NA	0	NA	0	0
AC209206.3_FG004	NA	NA	NA	NA	0		NA	0		0			NA	0	NA	0	NA	0	NA	0	NA	0	NA	0		NA	0	0	NA	0	0	0	0		NA	0	NA	0	0
AC209206.3_FG011	3	3	3	0.460186	0		0.180124	0		0			2.16324e-05	1	0.0137405	1	0.000539536	1	0.11657	0	0.383494	0	0.590101	0		0.59304	0	0	0.317693	0	0	0	0		0.122653	0	0.387611	0	0
AC209206.3_FG014	NA	NA	NA	NA	0		NA	0		0			NA	0	NA	0	NA	0	NA	0	NA	0	NA	0		NA	0	0	NA	0	0	0	0		NA	0	NA	0	0
AC209208.3_FG001	0	0	0	0.639673	0		0.432298	0		0			0.0376597	1	0.319426	0	0.076862	0	0.253567	0	0.508178	0	0.61621	0		0.550557	0	0	0.22036	0	0	0	0		0.274602	0	0.0338147	1	0
AC209208.3_FG002	8	4		0.552667	0		0.0553619	0		0			0.27424	0	0.457279	0	0.0303496	1	0.348404	0	0.0497316	1	0.347426	0		0.33599	0	0	0.0239574	1	0	0	0		0.0957279	0	0.000713094	1	0
AC209208.3_FG003	0	8		0.0178578	1	8	0.047891	1	0	1			0.228808	0	0.011799	1	0.018743	1	0.0154854	1	0.051145	0	0.703888	0		0.658831	0	0	0.447143	0	0	0	0		0.339936	0	0.13878	0	0
AC209208.3_FG004	NA	NA	NA	NA	0		NA	0		0			NA	0	NA	0	NA	0	NA	0	NA	0	NA	0		NA	0	0	NA	0	0	0	0		NA	0	NA	0	0
AC209208.3_FG005	2	2	2	0.169696	0		0.526703	0		0			2.17749e-05	1	0.4688	0	0.122309	0	0.00037408	1	0.0103194	1	0.558842	0		0.692613	0	0	0.739082	0	0	0	0		0.130794	0	0.193522	0	0
AC209212.3_FG005	NA	NA	NA	NA	0		NA	0		0			NA	0	NA	0	NA	0	NA	0	NA	0	NA	0		NA	0	0	NA	0	0	0	0		NA	0	NA	0	0
AC209213.4_FG002	1	1	1	2.05933e-06	1	1	0.000777246	1	1	1	1		3.96813e-24	1	5.46893e-16	1	3.41854e-13	1	0.00587331	1	7.96696e-05	1	0.453354	0		NA	0	0	NA	0	0	0	0		NA	0	NA	0	0
AC209215.4_FG004	NA	NA	NA	NA	0		NA	0		0			NA	0	NA	0	NA	0	NA	0	NA	0	NA	0		NA	0	0	NA	0	0	0	0		NA	0	NA	0	0
AC209215.4_FG006	4	4	4	0.31621	0		0.318936	0		0			0.221917	0	0.201229	0	0.11711	0	0.193482	0	0.231452	0	0.767715	0		NA	0	0	NA	0	0	0	0		NA	0	NA	0	0
AC209242.3_FG003	0	0	0	0.49425	0		0.460166	0		0			0.02269	1	0.495325	0	0.415019	0	0.0839163	0	0.0826397	0	0.750138	0		NA	0	0	NA	0	0	0	0		NA	0	NA	0	0
AC209257.4_FG003	1	1	1	0.502438	0		0.652587	0		0			1.16376e-10	1	0.00924343	1	0.00168852	1	0.000495764	1	0.00241175	1	0.708697	0		0.390769	0	0	0.312403	0	0	0	0		0.349101	0	0.404965	0	0
AC209257.4_FG004	NA	NA	NA	NA	0		NA	0		0			NA	0	NA	0	NA	0	NA	0	NA	0	NA	0		NA	0	0	NA	0	0	0	0		NA	0	NA	0	0
AC209257.4_FG006	2	2	2	0.0453633	1	2	0.139414	0		0			2.6226e-05	1	0.449376	0	0.425041	0	1.72222e-05	1	0.000121836	1	0.648466	0		0.501504	0	0	0.308647	0	0	0	0		0.404823	0	0.404965	0	0
AC209257.4_FG008	0	3		0.183407	0		0.437305	0		0			0.0416355	1	0.398109	0	0.0804942	0	0.0196002	1	0.502841	0	0.172408	0		0.0733078	0	0	0.205821	0	0	0	0		0.308223	0	0.305938	0	0
AC209332.3_FG011	4	4	4	0.296294	0		0.628196	0		0			0.0937006	0	0.417368	0	0.384378	0	0.062888	0	0.282956	0	0.575246	0		NA	0	0	NA	0	0	0	0		NA	0	NA	0	0
AC209356.4_FG001	NA	NA	NA	NA	0		NA	0		0			NA	0	NA	0	NA	0	NA	0	NA	0	NA	0		NA	0	0	NA	0	0	0	0		NA	0	NA	0	0
AC209364.3_FG004	NA	NA	NA	NA	0		NA	0		0			NA	0	NA	0	NA	0	NA	0	NA	0	NA	0		NA	0	0	NA	0	0	0	0		NA	0	NA	0	0
AC209364.3_FG007	NA	NA	NA	NA	0		NA	0		0			NA	0	NA	0	NA	0	NA	0	NA	0	NA	0		NA	0	0	NA	0	0	0	0		NA	0	NA	0	0
AC209364.3_FG009	2	2	2	0.2682	0		0.0985724	0		0			0.000274496	1	0.00459527	1	0.000284067	1	0.340117	0	0.45438	0	0.643808	0		0.742151	0	0	0.749445	0	0	0	0		0.0227135	1	0.0477695	1	1
AC209374.4_FG002	0	0	0	0.556104	0		0.636553	0		0			0.00796263	1	0.137497	0	0.111728	0	0.248085	0	0.271828	0	0.758662	0		0.584191	0	0	0.377426	0	0	0	0		0.0205654	1	0.00383194	1	1
AC209377.3_FG003	0	0	0	0.614644	0		0.5878	0		0			0.00327472	1	0.25467	0	0.0647944	0	0.0900976	0	0.275103	0	0.64801	0		0.648042	0	0	0.624574	0	0	0	0		0.224829	0	0.222759	0	0
AC209381.3_FG002	NA	NA	NA	NA	0		NA	0		0			NA	0	NA	0	NA	0	NA	0	NA	0	NA	0		NA	0	0	NA	0	0	0	0		NA	0	NA	0	0
AC209381.3_FG007	NA	NA	NA	NA	0		NA	0		0			NA	0	NA	0	NA	0	NA	0	NA	0	NA	0		NA	0	0	NA	0	0	0	0		NA	0	NA	0	0
AC209438.4_FG002	NA	NA	NA	NA	0		NA	0		0			NA	0	NA	0	NA	0	NA	0	NA	0	NA	0		NA	0	0	NA	0	0	0	0		NA	0	NA	0	0
AC209460.3_FG002	3	3	3	0.585286	0		0.628712	0		0			2.12108e-05	1	0.038516	1	0.0244049	1	0.0552036	0	0.0710066	0	0.774991	0		0.519185	0	0	0.737079	0	0	0	0		0.231806	0	0.317644	0	0
AC209463.4_FG013	NA	NA	NA	NA	0		NA	0		0			NA	0	NA	0	NA	0	NA	0	NA	0	NA	0		NA	0	0	NA	0	0	0	0		NA	0	NA	0	0
AC209624.2_FG001	2	3		0.361746	0		0.624473	0		0			0.000373365	1	0.0287874	1	0.149467	0	0.154123	0	0.0218724	1	0.458945	0		NA	0	0	NA	0	0	0	0		NA	0	NA	0	0
AC209624.2_FG003	NA	NA	NA	NA	0		NA	0		0			NA	0	NA	0	NA	0	NA	0	NA	0	NA	0		NA	0	0	NA	0	0	0	0		NA	0	NA	0	0
AC209626.2_FG013	4	4	4	0.504494	0		0.442588	0		0			0.182758	0	0.339859	0	0.171561	0	0.368084	0	0.375512	0	0.730544	0		0.321546	0	0	0.666224	0	0	0	0		0.0333901	1	0.309424	0	0
AC209629.2_FG003	NA	NA	NA	NA	0		NA	0		0			NA	0	NA	0	NA	0	NA	0	NA	0	NA	0		NA	0	0	NA	0	0	0	0		NA	0	NA	0	0
AC209629.2_FG007	NA	NA	NA	NA	0		NA	0		0			NA	0	NA	0	NA	0	NA	0	NA	0	NA	0		NA	0	0	NA	0	0	0	0		NA	0	NA	0	0
AC209636.2_FG003	0	3		0.0616149	0		0.695883	0		0			0.00593811	1	0.00364486	1	0.160813	0	0.256812	0	0.168457	0	0.24974	0		0.698749	0	0	0.386052	0	0	0	0		0.222182	0	0.20716	0	0
AC209647.2_FG001	NA	NA	NA	NA	0		NA	0		0			NA	0	NA	0	NA	0	NA	0	NA	0	NA	0		NA	0	0	NA	0	0	0	0		NA	0	NA	0	0
AC209647.2_FG002	NA	NA	NA	NA	0		NA	0		0			NA	0	NA	0	NA	0	NA	0	NA	0	NA	0		NA	0	0	NA	0	0	0	0		NA	0	NA	0	0
AC209651.2_FG001	NA	NA	NA	NA	0		NA	0		0			NA	0	NA	0	NA	0	NA	0	NA	0	NA	0		NA	0	0	NA	0	0	0	0		NA	0	NA	0	0
AC209664.3_FG002	4	6		0.000730766	1	6	0.585603	0		0			0.161144	0	0.00633094	1	0.253961	0	0.000289142	1	0.497609	0	0.00766596	1		0.539243	0	0	0.386764	0	0	0	0		0.341311	0	0.31145	0	0
AC209675.3_FG001	NA	NA	NA	NA	0		NA	0		0			NA	0	NA	0	NA	0	NA	0	NA	0	NA	0		NA	0	0	NA	0	0	0	0		NA	0	NA	0	0
AC209697.3_FG005	NA	NA	NA	NA	0		NA	0		0			NA	0	NA	0	NA	0	NA	0	NA	0	NA	0		NA	0	0	NA	0	0	0	0		NA	0	NA	0	0
AC209698.3_FG004	NA	NA	NA	NA	0		NA	0		0			NA	0	NA	0	NA	0	NA	0	NA	0	NA	0		NA	0	0	NA	0	0	0	0		NA	0	NA	0	0
AC209704.3_FG003	NA	NA	NA	NA	0		NA	0		0			NA	0	NA	0	NA	0	NA	0	NA	0	NA	0		NA	0	0	NA	0	0	0	0		NA	0	NA	0	0
AC209705.3_FG004	0	0	0	0.629927	0		0.514757	0		0			0.00573383	1	0.277285	0	0.0555907	0	0.110777	0	0.359144	0	0.60684	0		0.654603	0	0	0.661443	0	0	0	0		0.140159	0	0.2672	0	0
AC209710.4_FG002	NA	NA	NA	NA	0		NA	0		0			NA	0	NA	0	NA	0	NA	0	NA	0	NA	0		NA	0	0	NA	0	0	0	0		NA	0	NA	0	0
AC209718.1_FG009	1	3		0.339817	0		0.687005	0		0			1.58033e-06	1	0.146443	0	0.0117858	1	0.00186691	1	0.0328367	1	0.55088	0		0.656174	0	0	0.323548	0	0	0	0		0.0160378	1	0.00223544	1	1
AC209723.3_FG003	NA	NA	NA	NA	0		NA	0		0			NA	0	NA	0	NA	0	NA	0	NA	0	NA	0		NA	0	0	NA	0	0	0	0		NA	0	NA	0	0
AC209723.3_FG004	NA	NA	NA	NA	0		NA	0		0			NA	0	NA	0	NA	0	NA	0	NA	0	NA	0		NA	0	0	NA	0	0	0	0		NA	0	NA	0	0
AC209729.3_FG003	NA	NA	NA	NA	0		NA	0		0			NA	0	NA	0	NA	0	NA	0	NA	0	NA	0		NA	0	0	NA	0	0	0	0		NA	0	NA	0	0
AC209732.3_FG001	4	4	4	0.532707	0		0.572167	0		0			0.152492	0	0.348699	0	0.241767	0	0.413643	0	0.499057	0	0.779622	0		NA	0	0	NA	0	0	0	0		NA	0	NA	0	0
AC209734.3_FG005	NA	NA	NA	NA	0		NA	0		0			NA	0	NA	0	NA	0	NA	0	NA	0	NA	0		NA	0	0	NA	0	0	0	0		NA	0	NA	0	0
AC209737.3_FG006	3	3	3	0.0495618	1	3	0.322668	0		0			0.000528468	1	0.00351085	1	0.0164804	1	0.398607	0	0.178317	0	0.508759	0		NA	0	0	NA	0	0	0	0		NA	0	NA	0	0
AC209738.3_FG005	NA	NA	NA	NA	0		NA	0		0			NA	0	NA	0	NA	0	NA	0	NA	0	NA	0		NA	0	0	NA	0	0	0	0		NA	0	NA	0	0
AC209739.3_FG003	4	4	4	0.589348	0		0.614641	0		0			0.113512	0	0.525003	0	0.236451	0	0.242765	0	0.47929	0	0.649303	0		NA	0	0	NA	0	0	0	0		NA	0	NA	0	0
AC209744.3_FG001	4	4	4	0.612487	0		0.553657	0		0			0.210784	0	0.576583	0	0.383696	0	0.32768	0	0.319331	0	0.72265	0		NA	0	0	NA	0	0	0	0		NA	0	NA	0	0
AC209755.3_FG001	NA	NA	NA	NA	0		NA	0		0			NA	0	NA	0	NA	0	NA	0	NA	0	NA	0		NA	0	0	NA	0	0	0	0		NA	0	NA	0	0
AC209768.3_FG005	NA	NA	NA	NA	0		NA	0		0			NA	0	NA	0	NA	0	NA	0	NA	0	NA	0		NA	0	0	NA	0	0	0	0		NA	0	NA	0	0
AC209768.3_FG016	0	0	0	0.576585	0		0.681274	0		0			0.000972599	1	0.228772	0	0.104484	0	0.0519936	0	0.113668	0	0.734793	0		0.38405	0	0	0.502232	0	0	0	0		0.143038	0	0.287694	0	0
AC209778.3_FG002	NA	NA	NA	NA	0		NA	0		0			NA	0	NA	0	NA	0	NA	0	NA	0	NA	0		NA	0	0	NA	0	0	0	0		NA	0	NA	0	0
AC209780.2_FG003	NA	NA	NA	NA	0		NA	0		0			NA	0	NA	0	NA	0	NA	0	NA	0	NA	0		NA	0	0	NA	0	0	0	0		NA	0	NA	0	0
AC209784.3_FG007	2	2	2	0.00715446	1	2	0.000746597	1	2	1	2		8.18722e-06	1	0.402956	0	0.154494	0	1.00227e-06	1	6.27328e-08	1	0.663783	0		0.535474	0	0	0.301087	0	0	0	0		0.404823	0	0.20716	0	0
AC209784.3_FG011	2	2	2	0.548984	0		0.226528	0		0			0.000498893	1	0.273058	0	0.435075	0	0.0198658	1	0.0018267	1	0.537727	0		0.515628	0	0	0.505837	0	0	0	0		0.0442596	1	0.28018	0	0
AC209810.3_FG002	NA	NA	NA	NA	0		NA	0		0			NA	0	NA	0	NA	0	NA	0	NA	0	NA	0		NA	0	0	NA	0	0	0	0		NA	0	NA	0	0
[truncated: 37,669 more rows]
