# Supplementary material for: Complementation contributes to transcriptome complexity in maize (Zea mays L.) hybrids relative to their inbred parents
Source: HighWire-hosted journal article supplement (doi:10.1101/gr.138461.112), 2012-10-19
Supplement: TableS4.xlsx [file TableS4.xlsx]

## Sheet: Tabelle1
		Figure 2
		Gene expressed in
GENE_ID	classification Venn diagram	B73 (1)?	Mo17 (2)?	B73xMB (3)?	MxB (4)?		genomic PAVs
AC149810.2_FG004	no expression	0	0	0	0		0
AC152495.1_FG015	no expression	0	0	0	0		0
AC155376.2_FG002	no expression	0	0	0	0		0
AC155434.2_FG003	no expression	0	0	0	0		0
AC177837.3_FG002	no expression	0	0	0	0		0
AC177844.2_FG003	no expression	0	0	0	0		0
AC177893.3_FG006	no expression	0	0	0	0		0
AC177897.2_FG022	no expression	0	0	0	0		0
AC177897.2_FG029	no expression	0	0	0	0		0
AC177900.4_FG001	no expression	0	0	0	0		0
AC177905.2_FG001	no expression	0	0	0	0		0
AC177920.3_FG008	no expression	0	0	0	0		0
AC177930.2_FG001	no expression	0	0	0	0		0
AC177930.2_FG002	no expression	0	0	0	0		0
AC177941.3_FG001	no expression	0	0	0	0		0
AC182439.4_FG004	no expression	0	0	0	0		0
AC182615.4_FG001	no expression	0	0	0	0		0
AC182627.2_FG003	no expression	0	0	0	0		0
AC183914.3_FG004	no expression	0	0	0	0		0
AC183928.4_FG001	no expression	0	0	0	0		0
AC183938.4_FG011	no expression	0	0	0	0		0
AC184164.2_FG004	no expression	0	0	0	0		0
AC184164.2_FG006	no expression	0	0	0	0		0
AC184172.3_FG001	no expression	0	0	0	0		0
AC184771.4_FG003	no expression	0	0	0	0		0
AC184775.2_FG002	no expression	0	0	0	0		0
AC184788.2_FG001	no expression	0	0	0	0		0
AC184831.3_FG005	no expression	0	0	0	0		0
AC184831.3_FG008	no expression	0	0	0	0		0
AC184836.3_FG002	no expression	0	0	0	0		0
AC185108.3_FG006	no expression	0	0	0	0		0
AC185217.3_FG004	no expression	0	0	0	0		0
AC185217.3_FG007	no expression	0	0	0	0		0
AC185252.4_FG002	no expression	0	0	0	0		0
AC185261.4_FG002	no expression	0	0	0	0		0
AC185265.3_FG003	no expression	0	0	0	0		0
AC185276.2_FG006	no expression	0	0	0	0		0
AC185305.3_FG003	no expression	0	0	0	0		0
AC185473.3_FG005	no expression	0	0	0	0		0
AC185478.4_FG007	no expression	0	0	0	0		0
AC185487.4_FG001	no expression	0	0	0	0		0
AC185504.4_FG002	no expression	0	0	0	0		0
AC185610.3_FG001	no expression	0	0	0	0		0
AC185642.4_FG001	no expression	0	0	0	0		0
AC185648.3_FG007	no expression	0	0	0	0		0
AC185649.2_FG003	no expression	0	0	0	0		0
AC185660.3_FG003	no expression	0	0	0	0		0
AC186009.3_FG001	no expression	0	0	0	0		0
AC186156.3_FG004	no expression	0	0	0	0		0
AC186156.3_FG005	no expression	0	0	0	0		0
AC186195.4_FG001	no expression	0	0	0	0		0
AC186283.4_FG002	no expression	0	0	0	0		0
AC186309.3_FG002	no expression	0	0	0	0		0
AC186329.3_FG006	no expression	0	0	0	0		0
AC186408.5_FG005	no expression	0	0	0	0		0
AC186412.4_FG011	no expression	0	0	0	0		0
AC186417.3_FG006	no expression	0	0	0	0		0
AC186500.3_FG001	no expression	0	0	0	0		0
AC186563.4_FG004	no expression	0	0	0	0		0
AC186590.3_FG005	no expression	0	0	0	0		0
AC186590.3_FG006	no expression	0	0	0	0		0
AC186592.3_FG002	no expression	0	0	0	0		0
AC186647.3_FG001	no expression	0	0	0	0		0
AC186653.4_FG005	no expression	0	0	0	0		0
AC186656.4_FG004	no expression	0	0	0	0		0
AC186663.3_FG006	no expression	0	0	0	0		0
AC186691.4_FG006	no expression	0	0	0	0		0
AC186789.4_FG001	no expression	0	0	0	0		0
AC186807.4_FG002	no expression	0	0	0	0		0
AC186845.4_FG009	no expression	0	0	0	0		0
AC186902.4_FG006	no expression	0	0	0	0		0
AC186902.4_FG009	no expression	0	0	0	0		0
AC186905.3_FG013	no expression	0	0	0	0		0
AC187065.3_FG003	no expression	0	0	0	0		0
AC187072.4_FG001	no expression	0	0	0	0		0
AC187080.3_FG006	no expression	0	0	0	0		0
AC187082.3_FG003	no expression	0	0	0	0		0
AC187099.5_FG005	no expression	0	0	0	0		0
AC187209.5_FG010	no expression	0	0	0	0		0
AC187235.3_FG003	no expression	0	0	0	0		0
AC187460.4_FG002	no expression	0	0	0	0		0
AC187789.3_FG001	no expression	0	0	0	0		0
AC187800.4_FG003	no expression	0	0	0	0		0
AC187809.3_FG005	no expression	0	0	0	0		0
AC187843.3_FG010	no expression	0	0	0	0		0
AC187872.3_FG005	no expression	0	0	0	0		0
AC187887.3_FG008	no expression	0	0	0	0		0
AC187895.2_FG001	no expression	0	0	0	0		0
AC187895.2_FG002	no expression	0	0	0	0		0
AC187896.3_FG006	no expression	0	0	0	0		0
AC187903.3_FG004	no expression	0	0	0	0		0
AC187910.5_FG002	no expression	0	0	0	0		0
AC188195.2_FG003	no expression	0	0	0	0		0
AC188195.2_FG004	no expression	0	0	0	0		0
AC188195.2_FG005	no expression	0	0	0	0		0
AC188612.3_FG009	no expression	0	0	0	0		0
AC188718.3_FG005	no expression	0	0	0	0		0
AC188718.3_FG011	no expression	0	0	0	0		0
AC188735.3_FG001	no expression	0	0	0	0		0
AC188744.3_FG009	no expression	0	0	0	0		0
AC188745.3_FG001	no expression	0	0	0	0		0
AC188753.3_FG004	no expression	0	0	0	0		0
AC188756.2_FG004	no expression	0	0	0	0		0
AC188757.4_FG004	no expression	0	0	0	0		0
AC189084.3_FG002	no expression	0	0	0	0		0
AC190485.1_FG004	no expression	0	0	0	0		0
AC190549.3_FG004	no expression	0	0	0	0		0
AC190560.2_FG002	no expression	0	0	0	0		0
AC190576.2_FG002	no expression	0	0	0	0		0
AC190589.2_FG002	no expression	0	0	0	0		0
AC190614.3_FG004	no expression	0	0	0	0		0
AC190634.1_FG005	no expression	0	0	0	0		0
AC190638.3_FG001	no expression	0	0	0	0		0
AC190671.4_FG003	no expression	0	0	0	0		0
AC190685.3_FG005	no expression	0	0	0	0		0
AC190693.1_FG009	no expression	0	0	0	0		0
AC190716.3_FG001	no expression	0	0	0	0		0
AC190744.2_FG010	no expression	0	0	0	0		0
AC190751.4_FG008	no expression	0	0	0	0		0
AC190756.4_FG007	no expression	0	0	0	0		0
AC190789.3_FG005	no expression	0	0	0	0		0
AC190799.2_FG010	no expression	0	0	0	0		0
AC190807.2_FG001	no expression	0	0	0	0		0
AC190816.3_FG007	no expression	0	0	0	0		0
AC190858.3_FG004	no expression	0	0	0	0		0
AC190858.3_FG005	no expression	0	0	0	0		0
AC190913.3_FG002	no expression	0	0	0	0		0
AC190915.3_FG007	no expression	0	0	0	0		0
AC190932.3_FG008	no expression	0	0	0	0		0
AC190978.3_FG007	no expression	0	0	0	0		0
AC190990.2_FG005	no expression	0	0	0	0		0
AC191067.3_FG005	no expression	0	0	0	0		0
AC191069.3_FG007	no expression	0	0	0	0		0
AC191073.2_FG001	no expression	0	0	0	0		0
AC191098.3_FG002	no expression	0	0	0	0		0
AC191107.4_FG001	no expression	0	0	0	0		0
AC191147.3_FG002	no expression	0	0	0	0		0
AC191264.3_FG003	no expression	0	0	0	0		0
AC191279.2_FG001	no expression	0	0	0	0		0
AC191279.2_FG003	no expression	0	0	0	0		0
AC191297.3_FG004	no expression	0	0	0	0		0
AC191305.3_FG002	no expression	0	0	0	0		0
AC191328.3_FG002	no expression	0	0	0	0		0
AC191330.3_FG001	no expression	0	0	0	0		0
AC191362.3_FG002	no expression	0	0	0	0		0
AC191380.3_FG001	no expression	0	0	0	0		0
AC191401.3_FG009	no expression	0	0	0	0		0
AC191418.3_FG003	no expression	0	0	0	0		0
AC191421.3_FG001	no expression	0	0	0	0		0
AC191523.3_FG001	no expression	0	0	0	0		0
AC191562.3_FG008	no expression	0	0	0	0		0
AC191589.3_FG003	no expression	0	0	0	0		0
AC191622.3_FG005	no expression	0	0	0	0		0
AC191650.3_FG003	no expression	0	0	0	0		0
AC191691.3_FG011	no expression	0	0	0	0		0
AC191704.3_FG007	no expression	0	0	0	0		0
AC191708.3_FG001	no expression	0	0	0	0		0
AC191708.3_FG002	no expression	0	0	0	0		0
AC191735.3_FG009	no expression	0	0	0	0		0
AC191790.3_FG005	no expression	0	0	0	0		0
AC192175.3_FG001	no expression	0	0	0	0		0
AC193335.3_FG001	no expression	0	0	0	0		0
AC193576.3_FG003	no expression	0	0	0	0		0
AC193606.2_FG001	no expression	0	0	0	0		0
AC193606.2_FG005	no expression	0	0	0	0		0
AC193645.3_FG006	no expression	0	0	0	0		0
AC193744.3_FG009	no expression	0	0	0	0		0
AC193756.3_FG001	no expression	0	0	0	0		0
AC194016.3_FG001	no expression	0	0	0	0		0
AC194031.3_FG002	no expression	0	0	0	0		0
AC194039.4_FG009	no expression	0	0	0	0		0
AC194104.3_FG010	no expression	0	0	0	0		0
AC194136.3_FG001	no expression	0	0	0	0		0
AC194163.3_FG001	no expression	0	0	0	0		0
AC194163.3_FG002	no expression	0	0	0	0		0
AC194180.3_FG004	no expression	0	0	0	0		0
AC194273.3_FG006	no expression	0	0	0	0		0
AC194273.3_FG007	no expression	0	0	0	0		0
AC194321.3_FG009	no expression	0	0	0	0		0
AC194357.3_FG003	no expression	0	0	0	0		0
AC194438.3_FG005	no expression	0	0	0	0		0
AC194472.3_FG001	no expression	0	0	0	0		0
AC194480.3_FG001	no expression	0	0	0	0		0
AC194480.3_FG003	no expression	0	0	0	0		0
AC194481.3_FG002	no expression	0	0	0	0		0
AC194591.2_FG004	no expression	0	0	0	0		0
AC194828.3_FG012	no expression	0	0	0	0		0
AC194839.3_FG001	no expression	0	0	0	0		0
AC194853.1_FG002	no expression	0	0	0	0		0
AC194856.3_FG002	no expression	0	0	0	0		0
AC194856.3_FG007	no expression	0	0	0	0		0
AC194895.3_FG004	no expression	0	0	0	0		0
AC194940.3_FG001	no expression	0	0	0	0		0
AC195148.3_FG001	no expression	0	0	0	0		0
AC195168.2_FG004	no expression	0	0	0	0		0
AC195174.2_FG007	no expression	0	0	0	0		0
AC195207.2_FG002	no expression	0	0	0	0		0
AC195220.3_FG003	no expression	0	0	0	0		0
AC195220.3_FG007	no expression	0	0	0	0		0
AC195230.2_FG003	no expression	0	0	0	0		0
AC195240.4_FG002	no expression	0	0	0	0		0
AC195253.3_FG002	no expression	0	0	0	0		0
AC195307.3_FG001	no expression	0	0	0	0		0
AC195342.3_FG002	no expression	0	0	0	0		0
AC195367.3_FG001	no expression	0	0	0	0		0
AC195378.3_FG001	no expression	0	0	0	0		0
AC195458.3_FG001	no expression	0	0	0	0		0
AC195536.3_FG006	no expression	0	0	0	0		0
AC195545.3_FG003	no expression	0	0	0	0		0
AC195580.2_FG010	no expression	0	0	0	0		0
AC195596.3_FG002	no expression	0	0	0	0		0
AC195596.3_FG005	no expression	0	0	0	0		0
AC195608.3_FG006	no expression	0	0	0	0		0
AC195794.3_FG002	no expression	0	0	0	0		0
AC195806.3_FG001	no expression	0	0	0	0		0
AC195860.3_FG002	no expression	0	0	0	0		0
AC195920.3_FG006	no expression	0	0	0	0		0
AC195946.3_FG003	no expression	0	0	0	0		0
AC195995.3_FG006	no expression	0	0	0	0		0
AC196008.1_FG004	no expression	0	0	0	0		0
AC196009.2_FG008	no expression	0	0	0	0		0
AC196025.3_FG009	no expression	0	0	0	0		0
AC196025.3_FG013	no expression	0	0	0	0		0
AC196035.3_FG002	no expression	0	0	0	0		0
AC196048.2_FG001	no expression	0	0	0	0		0
AC196123.3_FG001	no expression	0	0	0	0		0
AC196135.3_FG006	no expression	0	0	0	0		0
AC196154.3_FG014	no expression	0	0	0	0		0
AC196206.3_FG007	no expression	0	0	0	0		0
AC196212.3_FG001	no expression	0	0	0	0		0
AC196259.2_FG010	no expression	0	0	0	0		0
AC196417.3_FG008	no expression	0	0	0	0		0
AC196709.3_FG001	no expression	0	0	0	0		0
AC196795.4_FG009	no expression	0	0	0	0		0
AC196954.2_FG012	no expression	0	0	0	0		0
AC196972.3_FG009	no expression	0	0	0	0		0
AC197021.3_FG004	no expression	0	0	0	0		0
AC197029.3_FG001	no expression	0	0	0	0		0
AC197041.3_FG001	no expression	0	0	0	0		0
AC197082.3_FG004	no expression	0	0	0	0		0
AC197082.3_FG005	no expression	0	0	0	0		0
AC197124.3_FG004	no expression	0	0	0	0		0
AC197140.2_FG001	no expression	0	0	0	0		0
AC197143.3_FG010	no expression	0	0	0	0		0
AC197145.4_FG001	no expression	0	0	0	0		0
AC197267.3_FG001	no expression	0	0	0	0		0
AC197575.3_FG008	no expression	0	0	0	0		0
AC197577.2_FG002	no expression	0	0	0	0		0
AC197697.3_FG001	no expression	0	0	0	0		0
AC197699.3_FG005	no expression	0	0	0	0		0
AC197699.3_FG009	no expression	0	0	0	0		0
AC197699.3_FG010	no expression	0	0	0	0		0
AC197738.3_FG007	no expression	0	0	0	0		0
AC197757.3_FG002	no expression	0	0	0	0		0
AC197757.3_FG003	no expression	0	0	0	0		0
AC197901.3_FG003	no expression	0	0	0	0		0
AC198179.4_FG002	no expression	0	0	0	0		0
AC198208.3_FG002	no expression	0	0	0	0		0
AC198230.4_FG003	no expression	0	0	0	0		0
AC198518.3_FG005	no expression	0	0	0	0		0
AC198723.4_FG002	no expression	0	0	0	0		0
AC198723.4_FG003	no expression	0	0	0	0		0
AC198781.3_FG002	no expression	0	0	0	0		0
AC198787.3_FG001	no expression	0	0	0	0		0
AC198995.3_FG003	no expression	0	0	0	0		0
AC199005.2_FG003	no expression	0	0	0	0		0
AC199084.3_FG004	no expression	0	0	0	0		0
AC199182.3_FG003	no expression	0	0	0	0		0
AC199198.3_FG002	no expression	0	0	0	0		0
AC199204.3_FG002	no expression	0	0	0	0		0
AC199315.4_FG002	no expression	0	0	0	0		0
AC199370.4_FG006	no expression	0	0	0	0		0
AC199379.4_FG001	no expression	0	0	0	0		0
AC199421.3_FG001	no expression	0	0	0	0		0
AC199479.4_FG004	no expression	0	0	0	0		0
AC199487.4_FG002	no expression	0	0	0	0		0
AC199488.4_FG003	no expression	0	0	0	0		0
AC199488.4_FG004	no expression	0	0	0	0		0
AC199517.4_FG001	no expression	0	0	0	0		0
AC199517.4_FG006	no expression	0	0	0	0		0
AC199524.3_FG002	no expression	0	0	0	0		0
AC199554.2_FG003	no expression	0	0	0	0		0
AC199572.3_FG005	no expression	0	0	0	0		0
AC199701.4_FG001	no expression	0	0	0	0		0
AC199768.4_FG008	no expression	0	0	0	0		0
AC199790.4_FG013	no expression	0	0	0	0		0
AC199810.3_FG003	no expression	0	0	0	0		0
AC199857.4_FG004	no expression	0	0	0	0		0
AC199875.3_FG002	no expression	0	0	0	0		0
AC199932.4_FG002	no expression	0	0	0	0		0
AC200045.3_FG006	no expression	0	0	0	0		0
AC200047.3_FG004	no expression	0	0	0	0		0
AC200106.4_FG003	no expression	0	0	0	0		0
AC200143.3_FG003	no expression	0	0	0	0		0
AC200171.2_FG001	no expression	0	0	0	0		0
AC200209.1_FG001	no expression	0	0	0	0		0
AC200234.3_FG001	no expression	0	0	0	0		0
AC200490.3_FG005	no expression	0	0	0	0		0
AC200497.4_FG015	no expression	0	0	0	0		0
AC200535.4_FG002	no expression	0	0	0	0		0
AC200725.4_FG008	no expression	0	0	0	0		0
AC200876.4_FG002	no expression	0	0	0	0		0
AC200876.4_FG003	no expression	0	0	0	0		0
AC201798.4_FG005	no expression	0	0	0	0		0
AC201828.3_FG002	no expression	0	0	0	0		0
AC201888.3_FG013	no expression	0	0	0	0		0
AC201966.3_FG001	no expression	0	0	0	0		0
AC201977.3_FG005	no expression	0	0	0	0		0
AC202015.3_FG004	no expression	0	0	0	0		0
AC202040.4_FG002	no expression	0	0	0	0		0
AC202091.4_FG003	no expression	0	0	0	0		0
AC202092.2_FG003	no expression	0	0	0	0		0
AC202122.2_FG001	no expression	0	0	0	0		0
AC202139.3_FG008	no expression	0	0	0	0		0
AC202172.3_FG004	no expression	0	0	0	0		0
AC202179.3_FG004	no expression	0	0	0	0		0
AC202391.4_FG002	no expression	0	0	0	0		0
AC202930.4_FG007	no expression	0	0	0	0		0
AC202991.3_FG003	no expression	0	0	0	0		0
AC203006.3_FG005	no expression	0	0	0	0		0
AC203183.3_FG001	no expression	0	0	0	0		0
AC203208.4_FG001	no expression	0	0	0	0		0
AC203228.3_FG003	no expression	0	0	0	0		0
AC203237.3_FG001	no expression	0	0	0	0		0
AC203253.4_FG001	no expression	0	0	0	0		0
AC203257.2_FG003	no expression	0	0	0	0		0
AC203262.3_FG002	no expression	0	0	0	0		0
AC203265.3_FG002	no expression	0	0	0	0		0
AC203311.3_FG005	no expression	0	0	0	0		0
AC203341.3_FG003	no expression	0	0	0	0		0
AC203531.3_FG002	no expression	0	0	0	0		0
AC203535.4_FG007	no expression	0	0	0	0		0
AC203753.4_FG007	no expression	0	0	0	0		0
AC203777.3_FG004	no expression	0	0	0	0		0
AC203790.3_FG004	no expression	0	0	0	0		0
AC203802.2_FG005	no expression	0	0	0	0		0
AC203847.3_FG004	no expression	0	0	0	0		0
AC203909.3_FG006	no expression	0	0	0	0		0
AC204035.3_FG003	no expression	0	0	0	0		0
AC204051.3_FG001	no expression	0	0	0	0		0
AC204231.3_FG010	no expression	0	0	0	0		0
AC204252.3_FG001	no expression	0	0	0	0		0
AC204292.4_FG005	no expression	0	0	0	0		0
AC204351.3_FG004	no expression	0	0	0	0		0
AC204387.3_FG002	no expression	0	0	0	0		0
AC204476.3_FG004	no expression	0	0	0	0		0
AC204540.3_FG001	no expression	0	0	0	0		0
AC204569.3_FG002	no expression	0	0	0	0		0
AC204581.3_FG003	no expression	0	0	0	0		0
AC204591.3_FG002	no expression	0	0	0	0		0
AC204605.3_FG008	no expression	0	0	0	0		0
AC204619.3_FG003	no expression	0	0	0	0		0
AC204641.5_FG003	no expression	0	0	0	0		0
AC204687.3_FG001	no expression	0	0	0	0		0
AC204707.4_FG001	no expression	0	0	0	0		0
AC204897.3_FG007	no expression	0	0	0	0		0
AC204944.3_FG004	no expression	0	0	0	0		0
AC205066.3_FG008	no expression	0	0	0	0		0
AC205106.3_FG004	no expression	0	0	0	0		0
AC205110.4_FG001	no expression	0	0	0	0		0
AC205165.3_FG002	no expression	0	0	0	0		0
AC205171.3_FG001	no expression	0	0	0	0		0
AC205173.3_FG001	no expression	0	0	0	0		0
AC205251.3_FG002	no expression	0	0	0	0		0
AC205411.3_FG001	no expression	0	0	0	0		0
AC205413.4_FG003	no expression	0	0	0	0		0
AC205532.3_FG001	no expression	0	0	0	0		0
AC205534.3_FG001	no expression	0	0	0	0		0
AC205591.4_FG006	no expression	0	0	0	0		0
AC205595.3_FG007	no expression	0	0	0	0		0
AC205605.3_FG002	no expression	0	0	0	0		0
AC205695.3_FG008	no expression	0	0	0	0		0
AC205713.4_FG004	no expression	0	0	0	0		0
AC205726.4_FG003	no expression	0	0	0	0		0
AC205814.3_FG001	no expression	0	0	0	0		0
AC205833.3_FG002	no expression	0	0	0	0		0
AC205972.3_FG002	no expression	0	0	0	0		0
AC205976.3_FG004	no expression	0	0	0	0		0
AC206156.3_FG003	no expression	0	0	0	0		0
AC206160.3_FG001	no expression	0	0	0	0		0
AC206185.3_FG002	no expression	0	0	0	0		0
AC206199.3_FG001	no expression	0	0	0	0		0
AC206262.3_FG004	no expression	0	0	0	0		0
AC206349.2_FG002	no expression	0	0	0	0		0
AC206547.2_FG002	no expression	0	0	0	0		0
AC206610.4_FG004	no expression	0	0	0	0		0
AC206611.3_FG002	no expression	0	0	0	0		0
AC206638.3_FG015	no expression	0	0	0	0		0
AC206647.3_FG003	no expression	0	0	0	0		0
AC206749.3_FG003	no expression	0	0	0	0		0
AC206968.3_FG001	no expression	0	0	0	0		0
AC206999.1_FG007	no expression	0	0	0	0		0
AC207011.3_FG001	no expression	0	0	0	0		0
AC207019.3_FG003	no expression	0	0	0	0		0
AC207254.3_FG005	no expression	0	0	0	0		0
AC207309.3_FG010	no expression	0	0	0	0		0
AC207321.3_FG003	no expression	0	0	0	0		0
AC207454.3_FG004	no expression	0	0	0	0		0
AC207472.3_FG001	no expression	0	0	0	0		0
AC207619.3_FG001	no expression	0	0	0	0		0
AC207620.2_FG007	no expression	0	0	0	0		0
AC207628.4_FG002	no expression	0	0	0	0		0
AC207733.3_FG001	no expression	0	0	0	0		0
AC207733.3_FG007	no expression	0	0	0	0		0
AC207740.3_FG005	no expression	0	0	0	0		0
AC207803.3_FG003	no expression	0	0	0	0		0
AC207896.4_FG003	no expression	0	0	0	0		0
AC208026.3_FG005	no expression	0	0	0	0		0
AC208308.3_FG004	no expression	0	0	0	0		0
AC208341.4_FG007	no expression	0	0	0	0		0
AC208341.4_FG008	no expression	0	0	0	0		0
AC208406.3_FG004	no expression	0	0	0	0		0
AC208411.3_FG013	no expression	0	0	0	0		0
AC208422.3_FG001	no expression	0	0	0	0		0
AC208422.3_FG002	no expression	0	0	0	0		0
AC208445.3_FG001	no expression	0	0	0	0		0
AC208445.3_FG006	no expression	0	0	0	0		0
AC208530.3_FG003	no expression	0	0	0	0		0
AC208539.3_FG003	no expression	0	0	0	0		0
AC208625.3_FG004	no expression	0	0	0	0		0
AC208644.2_FG005	no expression	0	0	0	0		0
AC208702.3_FG007	no expression	0	0	0	0		0
AC208915.3_FG010	no expression	0	0	0	0		0
AC208974.3_FG001	no expression	0	0	0	0		0
AC209015.3_FG004	no expression	0	0	0	0		0
AC209029.2_FG002	no expression	0	0	0	0		0
AC209062.3_FG002	no expression	0	0	0	0		0
AC209073.3_FG001	no expression	0	0	0	0		0
AC209074.3_FG007	no expression	0	0	0	0		0
AC209169.3_FG007	no expression	0	0	0	0		0
AC209177.3_FG001	no expression	0	0	0	0		0
AC209215.4_FG004	no expression	0	0	0	0		0
AC209356.4_FG001	no expression	0	0	0	0		0
AC209381.3_FG002	no expression	0	0	0	0		0
AC209647.2_FG001	no expression	0	0	0	0		0
AC209647.2_FG002	no expression	0	0	0	0		0
AC209651.2_FG001	no expression	0	0	0	0		0
AC209698.3_FG004	no expression	0	0	0	0		0
AC209734.3_FG005	no expression	0	0	0	0		0
AC209755.3_FG001	no expression	0	0	0	0		0
AC209811.3_FG001	no expression	0	0	0	0		0
AC209828.3_FG006	no expression	0	0	0	0		0
AC209852.3_FG004	no expression	0	0	0	0		0
AC209871.3_FG002	no expression	0	0	0	0		0
AC209926.4_FG002	no expression	0	0	0	0		0
AC209946.4_FG002	no expression	0	0	0	0		0
AC209962.3_FG004	no expression	0	0	0	0		0
AC209966.4_FG005	no expression	0	0	0	0		0
AC209971.4_FG003	no expression	0	0	0	0		0
AC209987.4_FG004	no expression	0	0	0	0		0
AC210001.3_FG010	no expression	0	0	0	0		0
AC210035.3_FG002	no expression	0	0	0	0		0
AC210154.3_FG003	no expression	0	0	0	0		0
AC210211.3_FG003	no expression	0	0	0	0		0
AC210302.3_FG004	no expression	0	0	0	0		0
AC210724.2_FG007	no expression	0	0	0	0		0
AC210828.3_FG007	no expression	0	0	0	0		0
AC210834.4_FG005	no expression	0	0	0	0		0
AC210834.4_FG006	no expression	0	0	0	0		0
AC210834.4_FG009	no expression	0	0	0	0		0
AC210834.4_FG012	no expression	0	0	0	0		0
AC210834.4_FG013	no expression	0	0	0	0		0
AC210949.4_FG003	no expression	0	0	0	0		0
AC210973.2_FG001	no expression	0	0	0	0		0
AC211001.3_FG002	no expression	0	0	0	0		0
AC211196.3_FG004	no expression	0	0	0	0		0
AC211253.3_FG002	no expression	0	0	0	0		0
AC211328.3_FG003	no expression	0	0	0	0		0
AC211332.4_FG005	no expression	0	0	0	0		0
AC211398.3_FG002	no expression	0	0	0	0		0
AC211471.3_FG002	no expression	0	0	0	0		0
AC211478.3_FG004	no expression	0	0	0	0		0
AC211577.3_FG002	no expression	0	0	0	0		0
AC211589.3_FG003	no expression	0	0	0	0		0
AC211652.4_FG003	no expression	0	0	0	0		0
AC211657.3_FG004	no expression	0	0	0	0		0
AC211658.4_FG002	no expression	0	0	0	0		0
AC211707.4_FG003	no expression	0	0	0	0		0
AC211740.3_FG005	no expression	0	0	0	0		0
AC211744.4_FG001	no expression	0	0	0	0		0
AC211887.3_FG001	no expression	0	0	0	0		0
AC211887.3_FG004	no expression	0	0	0	0		0
AC211891.4_FG003	no expression	0	0	0	0		0
AC211996.4_FG002	no expression	0	0	0	0		0
AC212103.3_FG002	no expression	0	0	0	0		0
AC212216.4_FG003	no expression	0	0	0	0		0
AC212225.3_FG001	no expression	0	0	0	0		0
AC212225.3_FG002	no expression	0	0	0	0		0
AC212343.3_FG002	no expression	0	0	0	0		0
AC212361.3_FG010	no expression	0	0	0	0		0
AC212394.4_FG010	no expression	0	0	0	0		0
AC212449.4_FG001	no expression	0	0	0	0		0
AC212449.4_FG002	no expression	0	0	0	0		0
AC212449.4_FG003	no expression	0	0	0	0		0
AC212449.4_FG004	no expression	0	0	0	0		0
AC212449.4_FG006	no expression	0	0	0	0		0
AC212449.4_FG007	no expression	0	0	0	0		0
AC212454.4_FG002	no expression	0	0	0	0		0
AC212463.3_FG009	no expression	0	0	0	0		0
AC212576.4_FG001	no expression	0	0	0	0		0
AC212581.3_FG009	no expression	0	0	0	0		0
AC212667.3_FG005	no expression	0	0	0	0		0
AC212668.2_FG001	no expression	0	0	0	0		0
AC212709.3_FG002	no expression	0	0	0	0		0
AC212720.3_FG006	no expression	0	0	0	0		0
AC212747.3_FG005	no expression	0	0	0	0		0
AC212823.4_FG003	no expression	0	0	0	0		0
AC212878.4_FG001	no expression	0	0	0	0		0
AC212886.3_FG006	no expression	0	0	0	0		0
AC212979.2_FG006	no expression	0	0	0	0		0
AC213048.3_FG002	no expression	0	0	0	0		0
AC213350.3_FG005	no expression	0	0	0	0		0
AC213524.3_FG003	no expression	0	0	0	0		0
AC213608.3_FG003	no expression	0	0	0	0		0
AC213788.2_FG004	no expression	0	0	0	0		0
AC213839.3_FG004	no expression	0	0	0	0		0
AC213846.4_FG003	no expression	0	0	0	0		0
AC214050.4_FG010	no expression	0	0	0	0		0
AC214051.3_FG003	no expression	0	0	0	0		0
AC214145.2_FG002	no expression	0	0	0	0		0
AC214227.4_FG011	no expression	0	0	0	0		0
AC214429.2_FG002	no expression	0	0	0	0		0
AC214437.4_FG001	no expression	0	0	0	0		0
AC214445.2_FG002	no expression	0	0	0	0		0
AC214503.3_FG003	no expression	0	0	0	0		0
AC214503.3_FG004	no expression	0	0	0	0		0
AC214503.3_FG008	no expression	0	0	0	0		0
AC214743.3_FG001	no expression	0	0	0	0		0
AC214765.3_FG001	no expression	0	0	0	0		0
AC214841.3_FG009	no expression	0	0	0	0		0
AC215178.3_FG002	no expression	0	0	0	0		0
AC215201.3_FG003	no expression	0	0	0	0		0
AC215290.3_FG002	no expression	0	0	0	0		0
AC215501.3_FG008	no expression	0	0	0	0		0
AC215875.3_FG001	no expression	0	0	0	0		0
AC216045.2_FG005	no expression	0	0	0	0		0
AC216070.2_FG005	no expression	0	0	0	0		0
AC216195.3_FG002	no expression	0	0	0	0		0
AC216229.3_FG002	no expression	0	0	0	0		0
AC216235.2_FG010	no expression	0	0	0	0		0
AC216246.2_FG002	no expression	0	0	0	0		0
AC216256.3_FG004	no expression	0	0	0	0		0
AC216705.3_FG002	no expression	0	0	0	0		0
AC216854.3_FG003	no expression	0	0	0	0		0
AC217046.5_FG002	no expression	0	0	0	0		0
AC217270.3_FG003	no expression	0	0	0	0		0
AC217270.3_FG004	no expression	0	0	0	0		0
AC217286.3_FG004	no expression	0	0	0	0		0
AC217313.3_FG001	no expression	0	0	0	0		0
AC217348.4_FG005	no expression	0	0	0	0		0
AC217348.4_FG006	no expression	0	0	0	0		0
AC217351.3_FG010	no expression	0	0	0	0		0
AC217376.3_FG001	no expression	0	0	0	0		0
AC217376.3_FG004	no expression	0	0	0	0		0
AC217415.3_FG001	no expression	0	0	0	0		0
AC217814.2_FG019	no expression	0	0	0	0		0
AC217823.3_FG002	no expression	0	0	0	0		0
AC217843.3_FG001	no expression	0	0	0	0		0
AC217896.2_FG001	no expression	0	0	0	0		0
AC217901.3_FG004	no expression	0	0	0	0		0
AC217959.3_FG001	no expression	0	0	0	0		0
AC217978.3_FG001	no expression	0	0	0	0		0
AC218154.3_FG004	no expression	0	0	0	0		0
AC218964.2_FG003	no expression	0	0	0	0		0
AC218979.3_FG003	no expression	0	0	0	0		0
AC218988.3_FG003	no expression	0	0	0	0		0
AC219034.3_FG002	no expression	0	0	0	0		0
AC219035.2_FG006	no expression	0	0	0	0		0
AC219074.1_FG001	no expression	0	0	0	0		0
AC219159.3_FG001	no expression	0	0	0	0		0
AC219159.3_FG002	no expression	0	0	0	0		0
AC220927.3_FG008	no expression	0	0	0	0		0
AC225176.2_FG006	no expression	0	0	0	0		0
AC225191.2_FG002	no expression	0	0	0	0		0
AC225225.2_FG003	no expression	0	0	0	0		0
AC225555.3_FG007	no expression	0	0	0	0		0
AC225564.3_FG003	no expression	0	0	0	0		0
AC225716.2_FG006	no expression	0	0	0	0		0
AC226221.2_FG011	no expression	0	0	0	0		0
AC226320.1_FG002	no expression	0	0	0	0		0
AC226536.2_FG001	no expression	0	0	0	0		0
AC226552.2_FG001	no expression	0	0	0	0		0
AC229873.1_FG003	no expression	0	0	0	0		0
AC230017.2_FG008	no expression	0	0	0	0		0
AC230023.2_FG002	no expression	0	0	0	0		0
AC230023.2_FG003	no expression	0	0	0	0		0
AC230023.2_FG004	no expression	0	0	0	0		0
AC230023.2_FG006	no expression	0	0	0	0		0
AC231425.1_FG006	no expression	0	0	0	0		0
AC232238.2_FG005	no expression	0	0	0	0		0
AC232289.2_FG009	no expression	0	0	0	0		0
AC233785.2_FG007	no expression	0	0	0	0		0
AC233871.1_FG003	no expression	0	0	0	0		0
AC233871.1_FG004	no expression	0	0	0	0		0
AC233871.1_FG005	no expression	0	0	0	0		0
AC233871.1_FG008	no expression	0	0	0	0		0
AC233889.1_FG003	no expression	0	0	0	0		0
AC233903.1_FG001	no expression	0	0	0	0		0
AC233904.1_FG002	no expression	0	0	0	0		0
AC233908.1_FG001	no expression	0	0	0	0		0
AC233926.1_FG002	no expression	0	0	0	0		0
AC233940.1_FG003	no expression	0	0	0	0		0
AC233952.1_FG004	no expression	0	0	0	0		0
AC233955.1_FG004	no expression	0	0	0	0		0
AC234091.1_FG001	no expression	0	0	0	0		0
AC234148.1_FG001	no expression	0	0	0	0		0
AC234149.1_FG001	no expression	0	0	0	0		0
AC234161.1_FG001	no expression	0	0	0	0		0
AC234161.1_FG002	no expression	0	0	0	0		0
AC234165.1_FG003	no expression	0	0	0	0		0
AC234169.1_FG001	no expression	0	0	0	0		0
AC234171.1_FG001	no expression	0	0	0	0		0
AC234515.1_FG002	no expression	0	0	0	0		0
AC234517.1_FG005	no expression	0	0	0	0		0
AC234519.1_FG002	no expression	0	0	0	0		0
AC234519.1_FG003	no expression	0	0	0	0		0
AC234519.1_FG004	no expression	0	0	0	0		0
AC234519.1_FG008	no expression	0	0	0	0		0
AC235539.1_FG001	no expression	0	0	0	0		0
AF546187.1_FG001	no expression	0	0	0	0		0
AF546187.1_FG007	no expression	0	0	0	0		0
AF546187.1_FG010	no expression	0	0	0	0		0
AF546188.1_FG002	no expression	0	0	0	0		0
AF546188.1_FG003	no expression	0	0	0	0		0
AF546188.1_FG005	no expression	0	0	0	0		0
AF546188.1_FG006	no expression	0	0	0	0		0
AF546188.1_FG007	no expression	0	0	0	0		0
EF517601.1_FG020	no expression	0	0	0	0		0
GRMZM2G000103	no expression	0	0	0	0		0
GRMZM2G000116	no expression	0	0	0	0		0
GRMZM2G000129	no expression	0	0	0	0		0
GRMZM2G000223	no expression	0	0	0	0		0
GRMZM2G000269	no expression	0	0	0	0		0
GRMZM2G000448	no expression	0	0	0	0		0
GRMZM2G000679	no expression	0	0	0	0		0
GRMZM2G000703	no expression	0	0	0	0		0
GRMZM2G000707	no expression	0	0	0	0		0
GRMZM2G000752	no expression	0	0	0	0		0
GRMZM2G000781	no expression	0	0	0	0		0
GRMZM2G000877	no expression	0	0	0	0		0
GRMZM2G001004	no expression	0	0	0	0		0
GRMZM2G001195	no expression	0	0	0	0		0
GRMZM2G001911	no expression	0	0	0	0		0
GRMZM2G002053	no expression	0	0	0	0		0
GRMZM2G002055	no expression	0	0	0	0		0
GRMZM2G002461	no expression	0	0	0	0		0
GRMZM2G002536	no expression	0	0	0	0		0
GRMZM2G002824	no expression	0	0	0	0		0
GRMZM2G002871	no expression	0	0	0	0		0
GRMZM2G002932	no expression	0	0	0	0		0
GRMZM2G002976	no expression	0	0	0	0		0
GRMZM2G003004	no expression	0	0	0	0		0
GRMZM2G003103	no expression	0	0	0	0		0
GRMZM2G003182	no expression	0	0	0	0		0
GRMZM2G003230	no expression	0	0	0	0		0
GRMZM2G003538	no expression	0	0	0	0		0
GRMZM2G003708	no expression	0	0	0	0		0
GRMZM2G004163	no expression	0	0	0	0		0
GRMZM2G004215	no expression	0	0	0	0		0
GRMZM2G004276	no expression	0	0	0	0		0
GRMZM2G004298	no expression	0	0	0	0		0
GRMZM2G004354	no expression	0	0	0	0		0
GRMZM2G004487	no expression	0	0	0	0		0
GRMZM2G004761	no expression	0	0	0	0		0
GRMZM2G005028	no expression	0	0	0	0		0
GRMZM2G005114	no expression	0	0	0	0		0
GRMZM2G005232	no expression	0	0	0	0		0
GRMZM2G005311	no expression	0	0	0	0		0
GRMZM2G005344	no expression	0	0	0	0		0
GRMZM2G005424	no expression	0	0	0	0		0
GRMZM2G005536	no expression	0	0	0	0		0
GRMZM2G005630	no expression	0	0	0	0		0
GRMZM2G005664	no expression	0	0	0	0		0
GRMZM2G005835	no expression	0	0	0	0		0
GRMZM2G005960	no expression	0	0	0	0		0
GRMZM2G005977	no expression	0	0	0	0		0
GRMZM2G006445	no expression	0	0	0	0		0
GRMZM2G006620	no expression	0	0	0	0		0
GRMZM2G006658	no expression	0	0	0	0		0
GRMZM2G006853	no expression	0	0	0	0		0
GRMZM2G007074	no expression	0	0	0	0		0
GRMZM2G007426	no expression	0	0	0	0		0
GRMZM2G007633	no expression	0	0	0	0		0
GRMZM2G007685	no expression	0	0	0	0		0
GRMZM2G007817	no expression	0	0	0	0		0
GRMZM2G007834	no expression	0	0	0	0		0
GRMZM2G007997	no expression	0	0	0	0		0
GRMZM2G008236	no expression	0	0	0	0		0
GRMZM2G008271	no expression	0	0	0	0		0
GRMZM2G008403	no expression	0	0	0	0		0
GRMZM2G008517	no expression	0	0	0	0		0
GRMZM2G008627	no expression	0	0	0	0		0
GRMZM2G008696	no expression	0	0	0	0		0
GRMZM2G008783	no expression	0	0	0	0		0
GRMZM2G008913	no expression	0	0	0	0		0
GRMZM2G009114	no expression	0	0	0	0		0
GRMZM2G009141	no expression	0	0	0	0		0
GRMZM2G009304	no expression	0	0	0	0		0
GRMZM2G009370	no expression	0	0	0	0		0
GRMZM2G009421	no expression	0	0	0	0		0
GRMZM2G009727	no expression	0	0	0	0		0
GRMZM2G009768	no expression	0	0	0	0		0
GRMZM2G009800	no expression	0	0	0	0		0
GRMZM2G009904	no expression	0	0	0	0		0
GRMZM2G009919	no expression	0	0	0	0		0
GRMZM2G010154	no expression	0	0	0	0		0
GRMZM2G010384	no expression	0	0	0	0		0
GRMZM2G010445	no expression	0	0	0	0		0
GRMZM2G010522	no expression	0	0	0	0		0
GRMZM2G010539	no expression	0	0	0	0		0
GRMZM2G010636	no expression	0	0	0	0		0
GRMZM2G010925	no expression	0	0	0	0		0
GRMZM2G011070	no expression	0	0	0	0		0
GRMZM2G011178	no expression	0	0	0	0		0
GRMZM2G011281	no expression	0	0	0	0		0
GRMZM2G011303	no expression	0	0	0	0		0
GRMZM2G011367	no expression	0	0	0	0		0
GRMZM2G011394	no expression	0	0	0	0		0
GRMZM2G011651	no expression	0	0	0	0		0
GRMZM2G012062	no expression	0	0	0	0		0
GRMZM2G012127	no expression	0	0	0	0		0
GRMZM2G012232	no expression	0	0	0	0		0
GRMZM2G012273	no expression	0	0	0	0		0
GRMZM2G012355	no expression	0	0	0	0		0
GRMZM2G012465	no expression	0	0	0	0		0
GRMZM2G012734	no expression	0	0	0	0		0
GRMZM2G012807	no expression	0	0	0	0		0
GRMZM2G012877	no expression	0	0	0	0		0
GRMZM2G012879	no expression	0	0	0	0		0
GRMZM2G012898	no expression	0	0	0	0		0
GRMZM2G013115	no expression	0	0	0	0		0
GRMZM2G013200	no expression	0	0	0	0		0
GRMZM2G013331	no expression	0	0	0	0		0
GRMZM2G013538	no expression	0	0	0	0		0
GRMZM2G013563	no expression	0	0	0	0		0
GRMZM2G013613	no expression	0	0	0	0		0
GRMZM2G013630	no expression	0	0	0	0		0
GRMZM2G013724	no expression	0	0	0	0		0
GRMZM2G013730	no expression	0	0	0	0		0
GRMZM2G013792	no expression	0	0	0	0		0
GRMZM2G013971	no expression	0	0	0	0		0
GRMZM2G014034	no expression	0	0	0	0		0
GRMZM2G014150	no expression	0	0	0	0		0
GRMZM2G014329	no expression	0	0	0	0		0
GRMZM2G014366	no expression	0	0	0	0		0
GRMZM2G014651	no expression	0	0	0	0		0
GRMZM2G014905	no expression	0	0	0	0		0
GRMZM2G014986	no expression	0	0	0	0		0
GRMZM2G014988	no expression	0	0	0	0		0
GRMZM2G015226	no expression	0	0	0	0		0
GRMZM2G015234	no expression	0	0	0	0		0
GRMZM2G015328	no expression	0	0	0	0		0
GRMZM2G015349	no expression	0	0	0	0		0
GRMZM2G015355	no expression	0	0	0	0		0
GRMZM2G015399	no expression	0	0	0	0		0
GRMZM2G015645	no expression	0	0	0	0		0
GRMZM2G015801	no expression	0	0	0	0		0
GRMZM2G015985	no expression	0	0	0	0		0
GRMZM2G016020	no expression	0	0	0	0		0
GRMZM2G016039	no expression	0	0	0	0		0
GRMZM2G016068	no expression	0	0	0	0		0
GRMZM2G016176	no expression	0	0	0	0		0
GRMZM2G016180	no expression	0	0	0	0		0
GRMZM2G016254	no expression	0	0	0	0		0
GRMZM2G016338	no expression	0	0	0	0		0
GRMZM2G016513	no expression	0	0	0	0		0
GRMZM2G016564	no expression	0	0	0	0		0
GRMZM2G016576	no expression	0	0	0	0		0
GRMZM2G016741	no expression	0	0	0	0		0
GRMZM2G016855	no expression	0	0	0	0		0
GRMZM2G016936	no expression	0	0	0	0		0
GRMZM2G016941	no expression	0	0	0	0		0
GRMZM2G016973	no expression	0	0	0	0		0
GRMZM2G017054	no expression	0	0	0	0		0
GRMZM2G017060	no expression	0	0	0	0		0
GRMZM2G017137	no expression	0	0	0	0		0
GRMZM2G017324	no expression	0	0	0	0		0
GRMZM2G017692	no expression	0	0	0	0		0
GRMZM2G017759	no expression	0	0	0	0		0
GRMZM2G018037	no expression	0	0	0	0		0
GRMZM2G018048	no expression	0	0	0	0		0
GRMZM2G018099	no expression	0	0	0	0		0
GRMZM2G018274	no expression	0	0	0	0		0
GRMZM2G018514	no expression	0	0	0	0		0
GRMZM2G018627	no expression	0	0	0	0		0
GRMZM2G018664	no expression	0	0	0	0		0
GRMZM2G018666	no expression	0	0	0	0		0
GRMZM2G018686	no expression	0	0	0	0		0
GRMZM2G018849	no expression	0	0	0	0		0
GRMZM2G019027	no expression	0	0	0	0		0
GRMZM2G019039	no expression	0	0	0	0		0
GRMZM2G019150	no expression	0	0	0	0		0
GRMZM2G019153	no expression	0	0	0	0		0
GRMZM2G019187	no expression	0	0	0	0		0
GRMZM2G019280	no expression	0	0	0	0		0
GRMZM2G019626	no expression	0	0	0	0		0
GRMZM2G019898	no expression	0	0	0	0		0
GRMZM2G019945	no expression	0	0	0	0		0
GRMZM2G020191	no expression	0	0	0	0		0
GRMZM2G020242	no expression	0	0	0	0		0
GRMZM2G020382	no expression	0	0	0	0		0
GRMZM2G020433	no expression	0	0	0	0		0
GRMZM2G020471	no expression	0	0	0	0		0
GRMZM2G020478	no expression	0	0	0	0		0
GRMZM2G020492	no expression	0	0	0	0		0
GRMZM2G021155	no expression	0	0	0	0		0
GRMZM2G021248	no expression	0	0	0	0		0
GRMZM2G021617	no expression	0	0	0	0		0
GRMZM2G021935	no expression	0	0	0	0		0
GRMZM2G022095	no expression	0	0	0	0		0
GRMZM2G022437	no expression	0	0	0	0		0
GRMZM2G022634	no expression	0	0	0	0		0
GRMZM2G022863	no expression	0	0	0	0		0
GRMZM2G022892	no expression	0	0	0	0		0
GRMZM2G022907	no expression	0	0	0	0		0
GRMZM2G023191	no expression	0	0	0	0		0
GRMZM2G023254	no expression	0	0	0	0		0
GRMZM2G023312	no expression	0	0	0	0		0
GRMZM2G023422	no expression	0	0	0	0		0
GRMZM2G024025	no expression	0	0	0	0		0
GRMZM2G024192	no expression	0	0	0	0		0
GRMZM2G024221	no expression	0	0	0	0		0
GRMZM2G024778	no expression	0	0	0	0		0
GRMZM2G024959	no expression	0	0	0	0		0
GRMZM2G025264	no expression	0	0	0	0		0
GRMZM2G025396	no expression	0	0	0	0		0
GRMZM2G025572	no expression	0	0	0	0		0
GRMZM2G025640	no expression	0	0	0	0		0
GRMZM2G025763	no expression	0	0	0	0		0
GRMZM2G025895	no expression	0	0	0	0		0
GRMZM2G026376	no expression	0	0	0	0		0
GRMZM2G026388	no expression	0	0	0	0		0
GRMZM2G026546	no expression	0	0	0	0		0
GRMZM2G026568	no expression	0	0	0	0		0
GRMZM2G026939	no expression	0	0	0	0		0
GRMZM2G027167	no expression	0	0	0	0		0
GRMZM2G027221	no expression	0	0	0	0		0
GRMZM2G027347	no expression	0	0	0	0		0
GRMZM2G027385	no expression	0	0	0	0		0
GRMZM2G027393	no expression	0	0	0	0		0
GRMZM2G027519	no expression	0	0	0	0		0
GRMZM2G027530	no expression	0	0	0	0		0
GRMZM2G027551	no expression	0	0	0	0		0
GRMZM2G027626	no expression	0	0	0	0		0
GRMZM2G028060	no expression	0	0	0	0		0
GRMZM2G028086	no expression	0	0	0	0		0
GRMZM2G028662	no expression	0	0	0	0		0
GRMZM2G028862	no expression	0	0	0	0		0
GRMZM2G028966	no expression	0	0	0	0		0
GRMZM2G029151	no expression	0	0	0	0		0
GRMZM2G029300	no expression	0	0	0	0		0
GRMZM2G029926	no expression	0	0	0	0		0
GRMZM2G029956	no expression	0	0	0	0		0
GRMZM2G030556	no expression	0	0	0	0		0
GRMZM2G030669	no expression	0	0	0	0		0
GRMZM2G031102	no expression	0	0	0	0		0
GRMZM2G031139	no expression	0	0	0	0		0
GRMZM2G031216	no expression	0	0	0	0		0
GRMZM2G031222	no expression	0	0	0	0		0
GRMZM2G031404	no expression	0	0	0	0		0
GRMZM2G031446	no expression	0	0	0	0		0
GRMZM2G031771	no expression	0	0	0	0		0
GRMZM2G031788	no expression	0	0	0	0		0
GRMZM2G031905	no expression	0	0	0	0		0
GRMZM2G031996	no expression	0	0	0	0		0
GRMZM2G032070	no expression	0	0	0	0		0
GRMZM2G032143	no expression	0	0	0	0		0
GRMZM2G032537	no expression	0	0	0	0		0
GRMZM2G032583	no expression	0	0	0	0		0
GRMZM2G032682	no expression	0	0	0	0		0
GRMZM2G033288	no expression	0	0	0	0		0
GRMZM2G033326	no expression	0	0	0	0		0
GRMZM2G034271	no expression	0	0	0	0		0
GRMZM2G034300	no expression	0	0	0	0		0
GRMZM2G034469	no expression	0	0	0	0		0
GRMZM2G034651	no expression	0	0	0	0		0
GRMZM2G034709	no expression	0	0	0	0		0
GRMZM2G034807	no expression	0	0	0	0		0
GRMZM2G034927	no expression	0	0	0	0		0
GRMZM2G034932	no expression	0	0	0	0		0
GRMZM2G034956	no expression	0	0	0	0		0
GRMZM2G034991	no expression	0	0	0	0		0
GRMZM2G035044	no expression	0	0	0	0		0
GRMZM2G035049	no expression	0	0	0	0		0
GRMZM2G035419	no expression	0	0	0	0		0
GRMZM2G035490	no expression	0	0	0	0		0
GRMZM2G035712	no expression	0	0	0	0		0
GRMZM2G035778	no expression	0	0	0	0		0
GRMZM2G036411	no expression	0	0	0	0		0
GRMZM2G036792	no expression	0	0	0	0		0
GRMZM2G037001	no expression	0	0	0	0		0
GRMZM2G037023	no expression	0	0	0	0		0
GRMZM2G037299	no expression	0	0	0	0		0
GRMZM2G037323	no expression	0	0	0	0		0
GRMZM2G037413	no expression	0	0	0	0		0
GRMZM2G037461	no expression	0	0	0	0		0
GRMZM2G037482	no expression	0	0	0	0		0
GRMZM2G037639	no expression	0	0	0	0		0
GRMZM2G037648	no expression	0	0	0	0		0
GRMZM2G037751	no expression	0	0	0	0		0
GRMZM2G037931	no expression	0	0	0	0		0
GRMZM2G037954	no expression	0	0	0	0		0
GRMZM2G037955	no expression	0	0	0	0		0
GRMZM2G038024	no expression	0	0	0	0		0
GRMZM2G038116	no expression	0	0	0	0		0
GRMZM2G038165	no expression	0	0	0	0		0
GRMZM2G038252	no expression	0	0	0	0		0
GRMZM2G038291	no expression	0	0	0	0		0
GRMZM2G038501	no expression	0	0	0	0		0
GRMZM2G038570	no expression	0	0	0	0		0
GRMZM2G038604	no expression	0	0	0	0		0
GRMZM2G039154	no expression	0	0	0	0		0
GRMZM2G039665	no expression	0	0	0	0		0
GRMZM2G039942	no expression	0	0	0	0		0
GRMZM2G039945	no expression	0	0	0	0		0
GRMZM2G039974	no expression	0	0	0	0		0
GRMZM2G040003	no expression	0	0	0	0		0
GRMZM2G040020	no expression	0	0	0	0		0
GRMZM2G040085	no expression	0	0	0	0		0
GRMZM2G040088	no expression	0	0	0	0		0
GRMZM2G040098	no expression	0	0	0	0		0
GRMZM2G040129	no expression	0	0	0	0		0
GRMZM2G040555	no expression	0	0	0	0		0
GRMZM2G040660	no expression	0	0	0	0		0
GRMZM2G040818	no expression	0	0	0	0		0
GRMZM2G040858	no expression	0	0	0	0		0
GRMZM2G040932	no expression	0	0	0	0		0
GRMZM2G041167	no expression	0	0	0	0		0
GRMZM2G041183	no expression	0	0	0	0		0
GRMZM2G041247	no expression	0	0	0	0		0
GRMZM2G041277	no expression	0	0	0	0		0
GRMZM2G041288	no expression	0	0	0	0		0
GRMZM2G041368	no expression	0	0	0	0		0
GRMZM2G041404	no expression	0	0	0	0		0
GRMZM2G041442	no expression	0	0	0	0		0
GRMZM2G041448	no expression	0	0	0	0		0
GRMZM2G041456	no expression	0	0	0	0		0
GRMZM2G041595	no expression	0	0	0	0		0
GRMZM2G041631	no expression	0	0	0	0		0
GRMZM2G042034	no expression	0	0	0	0		0
GRMZM2G042147	no expression	0	0	0	0		0
GRMZM2G042332	no expression	0	0	0	0		0
GRMZM2G042479	no expression	0	0	0	0		0
GRMZM2G042662	no expression	0	0	0	0		0
GRMZM2G042715	no expression	0	0	0	0		0
GRMZM2G042738	no expression	0	0	0	0		0
GRMZM2G042776	no expression	0	0	0	0		0
GRMZM2G042811	no expression	0	0	0	0		0
GRMZM2G043254	no expression	0	0	0	0		0
GRMZM2G043340	no expression	0	0	0	0		0
GRMZM2G043368	no expression	0	0	0	0		0
GRMZM2G043387	no expression	0	0	0	0		0
GRMZM2G043650	no expression	0	0	0	0		0
GRMZM2G044152	no expression	0	0	0	0		0
GRMZM2G044166	no expression	0	0	0	0		0
GRMZM2G044438	no expression	0	0	0	0		0
GRMZM2G044548	no expression	0	0	0	0		0
GRMZM2G044598	no expression	0	0	0	0		0
GRMZM2G044625	no expression	0	0	0	0		0
GRMZM2G044659	no expression	0	0	0	0		0
GRMZM2G044867	no expression	0	0	0	0		0
GRMZM2G045030	no expression	0	0	0	0		0
GRMZM2G045039	no expression	0	0	0	0		0
GRMZM2G045064	no expression	0	0	0	0		0
GRMZM2G045096	no expression	0	0	0	0		0
GRMZM2G045106	no expression	0	0	0	0		0
GRMZM2G045178	no expression	0	0	0	0		0
GRMZM2G045268	no expression	0	0	0	0		0
GRMZM2G045378	no expression	0	0	0	0		0
GRMZM2G045550	no expression	0	0	0	0		0
GRMZM2G045610	no expression	0	0	0	0		0
GRMZM2G045650	no expression	0	0	0	0		0
GRMZM2G045727	no expression	0	0	0	0		0
GRMZM2G045735	no expression	0	0	0	0		0
GRMZM2G046092	no expression	0	0	0	0		0
GRMZM2G046431	no expression	0	0	0	0		0
GRMZM2G047164	no expression	0	0	0	0		0
GRMZM2G047292	no expression	0	0	0	0		0
GRMZM2G047382	no expression	0	0	0	0		0
GRMZM2G047628	no expression	0	0	0	0		0
GRMZM2G047684	no expression	0	0	0	0		0
GRMZM2G047699	no expression	0	0	0	0		0
GRMZM2G047713	no expression	0	0	0	0		0
GRMZM2G047905	no expression	0	0	0	0		0
GRMZM2G047910	no expression	0	0	0	0		0
GRMZM2G048033	no expression	0	0	0	0		0
GRMZM2G049025	no expression	0	0	0	0		0
GRMZM2G049176	no expression	0	0	0	0		0
GRMZM2G049370	no expression	0	0	0	0		0
GRMZM2G049424	no expression	0	0	0	0		0
GRMZM2G049432	no expression	0	0	0	0		0
GRMZM2G049660	no expression	0	0	0	0		0
GRMZM2G049691	no expression	0	0	0	0		0
GRMZM2G050131	no expression	0	0	0	0		0
GRMZM2G050262	no expression	0	0	0	0		0
GRMZM2G050410	no expression	0	0	0	0		0
GRMZM2G050418	no expression	0	0	0	0		0
GRMZM2G050427	no expression	0	0	0	0		0
GRMZM2G050687	no expression	0	0	0	0		0
GRMZM2G050883	no expression	0	0	0	0		0
GRMZM2G050994	no expression	0	0	0	0		0
GRMZM2G051172	no expression	0	0	0	0		0
GRMZM2G051192	no expression	0	0	0	0		0
GRMZM2G051406	no expression	0	0	0	0		0
GRMZM2G051417	no expression	0	0	0	0		0
GRMZM2G051427	no expression	0	0	0	0		0
GRMZM2G051456	no expression	0	0	0	0		0
GRMZM2G051460	no expression	0	0	0	0		0
GRMZM2G051604	no expression	0	0	0	0		0
GRMZM2G051659	no expression	0	0	0	0		0
GRMZM2G051709	no expression	0	0	0	0		0
GRMZM2G051745	no expression	0	0	0	0		0
GRMZM2G051758	no expression	0	0	0	0		0
GRMZM2G051882	no expression	0	0	0	0		0
GRMZM2G051958	no expression	0	0	0	0		0
GRMZM2G052076	no expression	0	0	0	0		0
GRMZM2G052175	no expression	0	0	0	0		0
GRMZM2G052213	no expression	0	0	0	0		0
GRMZM2G052241	no expression	0	0	0	0		0
GRMZM2G052621	no expression	0	0	0	0		0
GRMZM2G052816	no expression	0	0	0	0		0
GRMZM2G053016	no expression	0	0	0	0		0
GRMZM2G053037	no expression	0	0	0	0		0
GRMZM2G053120	no expression	0	0	0	0		0
GRMZM2G053126	no expression	0	0	0	0		0
GRMZM2G053653	no expression	0	0	0	0		0
GRMZM2G053690	no expression	0	0	0	0		0
GRMZM2G053711	no expression	0	0	0	0		0
GRMZM2G053757	no expression	0	0	0	0		0
GRMZM2G053830	no expression	0	0	0	0		0
GRMZM2G053868	no expression	0	0	0	0		0
GRMZM2G053890	no expression	0	0	0	0		0
GRMZM2G053914	no expression	0	0	0	0		0
GRMZM2G054120	no expression	0	0	0	0		0
GRMZM2G054130	no expression	0	0	0	0		0
GRMZM2G054133	no expression	0	0	0	0		0
GRMZM2G054602	no expression	0	0	0	0		0
GRMZM2G054931	no expression	0	0	0	0		0
GRMZM2G054987	no expression	0	0	0	0		0
GRMZM2G055018	no expression	0	0	0	0		0
GRMZM2G055114	no expression	0	0	0	0		0
GRMZM2G055124	no expression	0	0	0	0		0
GRMZM2G055155	no expression	0	0	0	0		0
GRMZM2G055178	no expression	0	0	0	0		0
GRMZM2G055238	no expression	0	0	0	0		0
GRMZM2G055262	no expression	0	0	0	0		0
GRMZM2G055487	no expression	0	0	0	0		0
GRMZM2G055501	no expression	0	0	0	0		0
GRMZM2G055795	no expression	0	0	0	0		0
GRMZM2G055859	no expression	0	0	0	0		0
GRMZM2G056019	no expression	0	0	0	0		0
GRMZM2G056216	no expression	0	0	0	0		0
GRMZM2G056547	no expression	0	0	0	0		0
GRMZM2G056896	no expression	0	0	0	0		0
GRMZM2G056899	no expression	0	0	0	0		0
GRMZM2G056934	no expression	0	0	0	0		0
GRMZM2G056983	no expression	0	0	0	0		0
GRMZM2G057051	no expression	0	0	0	0		0
GRMZM2G057171	no expression	0	0	0	0		0
GRMZM2G057220	no expression	0	0	0	0		0
GRMZM2G057495	no expression	0	0	0	0		0
GRMZM2G057772	no expression	0	0	0	0		0
GRMZM2G057966	no expression	0	0	0	0		0
GRMZM2G057975	no expression	0	0	0	0		0
GRMZM2G058033	no expression	0	0	0	0		0
GRMZM2G058070	no expression	0	0	0	0		0
GRMZM2G058336	no expression	0	0	0	0		0
GRMZM2G058382	no expression	0	0	0	0		0
GRMZM2G058459	no expression	0	0	0	0		0
GRMZM2G058549	no expression	0	0	0	0		0
GRMZM2G058602	no expression	0	0	0	0		0
GRMZM2G058703	no expression	0	0	0	0		0
GRMZM2G058739	no expression	0	0	0	0		0
GRMZM2G059169	no expression	0	0	0	0		0
GRMZM2G059339	no expression	0	0	0	0		0
GRMZM2G059358	no expression	0	0	0	0		0
GRMZM2G059620	no expression	0	0	0	0		0
GRMZM2G059711	no expression	0	0	0	0		0
GRMZM2G059908	no expression	0	0	0	0		0
GRMZM2G060050	no expression	0	0	0	0		0
GRMZM2G060073	no expression	0	0	0	0		0
GRMZM2G060118	no expression	0	0	0	0		0
GRMZM2G060150	no expression	0	0	0	0		0
GRMZM2G060190	no expression	0	0	0	0		0
GRMZM2G060394	no expression	0	0	0	0		0
GRMZM2G060715	no expression	0	0	0	0		0
GRMZM2G060735	no expression	0	0	0	0		0
GRMZM2G060781	no expression	0	0	0	0		0
GRMZM2G060898	no expression	0	0	0	0		0
GRMZM2G061118	no expression	0	0	0	0		0
GRMZM2G061143	no expression	0	0	0	0		0
GRMZM2G061182	no expression	0	0	0	0		0
GRMZM2G061318	no expression	0	0	0	0		0
GRMZM2G061408	no expression	0	0	0	0		0
GRMZM2G061444	no expression	0	0	0	0		0
GRMZM2G061613	no expression	0	0	0	0		0
GRMZM2G061790	no expression	0	0	0	0		0
GRMZM2G061965	no expression	0	0	0	0		0
GRMZM2G062044	no expression	0	0	0	0		0
GRMZM2G062091	no expression	0	0	0	0		0
GRMZM2G062165	no expression	0	0	0	0		0
GRMZM2G062197	no expression	0	0	0	0		0
GRMZM2G062320	no expression	0	0	0	0		0
GRMZM2G062544	no expression	0	0	0	0		0
GRMZM2G062574	no expression	0	0	0	0		0
GRMZM2G062635	no expression	0	0	0	0		0
GRMZM2G062706	no expression	0	0	0	0		0
GRMZM2G063126	no expression	0	0	0	0		0
GRMZM2G063139	no expression	0	0	0	0		0
GRMZM2G063184	no expression	0	0	0	0		0
GRMZM2G063238	no expression	0	0	0	0		0
GRMZM2G063271	no expression	0	0	0	0		0
GRMZM2G063798	no expression	0	0	0	0		0
GRMZM2G063903	no expression	0	0	0	0		0
GRMZM2G063924	no expression	0	0	0	0		0
GRMZM2G064008	no expression	0	0	0	0		0
GRMZM2G064344	no expression	0	0	0	0		0
GRMZM2G064352	no expression	0	0	0	0		0
GRMZM2G064356	no expression	0	0	0	0		0
GRMZM2G064434	no expression	0	0	0	0		0
GRMZM2G064442	no expression	0	0	0	0		0
GRMZM2G064475	no expression	0	0	0	0		0
GRMZM2G064530	no expression	0	0	0	0		0
GRMZM2G064533	no expression	0	0	0	0		0
GRMZM2G064810	no expression	0	0	0	0		0
GRMZM2G064845	no expression	0	0	0	0		0
GRMZM2G064941	no expression	0	0	0	0		0
GRMZM2G065016	no expression	0	0	0	0		0
GRMZM2G065097	no expression	0	0	0	0		0
GRMZM2G065168	no expression	0	0	0	0		0
GRMZM2G065174	no expression	0	0	0	0		0
GRMZM2G065323	no expression	0	0	0	0		0
GRMZM2G065466	no expression	0	0	0	0		0
GRMZM2G065538	no expression	0	0	0	0		0
GRMZM2G065560	no expression	0	0	0	0		0
GRMZM2G065884	no expression	0	0	0	0		0
GRMZM2G065915	no expression	0	0	0	0		0
GRMZM2G066047	no expression	0	0	0	0		0
GRMZM2G066103	no expression	0	0	0	0		0
GRMZM2G066163	no expression	0	0	0	0		0
GRMZM2G066248	no expression	0	0	0	0		0
GRMZM2G066352	no expression	0	0	0	0		0
GRMZM2G066377	no expression	0	0	0	0		0
GRMZM2G066388	no expression	0	0	0	0		0
GRMZM2G066406	no expression	0	0	0	0		0
GRMZM2G066410	no expression	0	0	0	0		0
GRMZM2G066480	no expression	0	0	0	0		0
GRMZM2G066546	no expression	0	0	0	0		0
GRMZM2G066587	no expression	0	0	0	0		0
GRMZM2G066638	no expression	0	0	0	0		0
GRMZM2G066639	no expression	0	0	0	0		0
GRMZM2G066700	no expression	0	0	0	0		0
GRMZM2G066710	no expression	0	0	0	0		0
GRMZM2G066726	no expression	0	0	0	0		0
GRMZM2G066791	no expression	0	0	0	0		0
GRMZM2G066865	no expression	0	0	0	0		0
GRMZM2G066948	no expression	0	0	0	0		0
GRMZM2G067158	no expression	0	0	0	0		0
GRMZM2G067450	no expression	0	0	0	0		0
GRMZM2G067640	no expression	0	0	0	0		0
GRMZM2G067710	no expression	0	0	0	0		0
GRMZM2G067767	no expression	0	0	0	0		0
GRMZM2G068230	no expression	0	0	0	0		0
GRMZM2G068265	no expression	0	0	0	0		0
GRMZM2G068547	no expression	0	0	0	0		0
GRMZM2G068778	no expression	0	0	0	0		0
GRMZM2G068959	no expression	0	0	0	0		0
GRMZM2G069153	no expression	0	0	0	0		0
GRMZM2G069201	no expression	0	0	0	0		0
GRMZM2G069264	no expression	0	0	0	0		0
GRMZM2G069274	no expression	0	0	0	0		0
GRMZM2G069284	no expression	0	0	0	0		0
GRMZM2G069408	no expression	0	0	0	0		0
GRMZM2G069606	no expression	0	0	0	0		0
GRMZM2G069820	no expression	0	0	0	0		0
GRMZM2G070113	no expression	0	0	0	0		0
GRMZM2G070356	no expression	0	0	0	0		0
GRMZM2G070465	no expression	0	0	0	0		0
GRMZM2G070521	no expression	0	0	0	0		0
GRMZM2G070573	no expression	0	0	0	0		0
GRMZM2G070591	no expression	0	0	0	0		0
GRMZM2G070664	no expression	0	0	0	0		0
GRMZM2G070685	no expression	0	0	0	0		0
GRMZM2G070717	no expression	0	0	0	0		0
GRMZM2G070784	no expression	0	0	0	0		0
GRMZM2G070818	no expression	0	0	0	0		0
GRMZM2G071052	no expression	0	0	0	0		0
GRMZM2G071217	no expression	0	0	0	0		0
GRMZM2G071219	no expression	0	0	0	0		0
GRMZM2G071226	no expression	0	0	0	0		0
GRMZM2G071475	no expression	0	0	0	0		0
GRMZM2G071664	no expression	0	0	0	0		0
GRMZM2G071735	no expression	0	0	0	0		0
GRMZM2G071771	no expression	0	0	0	0		0
GRMZM2G071924	no expression	0	0	0	0		0
GRMZM2G072044	no expression	0	0	0	0		0
GRMZM2G072371	no expression	0	0	0	0		0
GRMZM2G072383	no expression	0	0	0	0		0
GRMZM2G072606	no expression	0	0	0	0		0
GRMZM2G072645	no expression	0	0	0	0		0
GRMZM2G072780	no expression	0	0	0	0		0
GRMZM2G072997	no expression	0	0	0	0		0
GRMZM2G073041	no expression	0	0	0	0		0
GRMZM2G073192	no expression	0	0	0	0		0
GRMZM2G073258	no expression	0	0	0	0		0
GRMZM2G073415	no expression	0	0	0	0		0
GRMZM2G073774	no expression	0	0	0	0		0
GRMZM2G073916	no expression	0	0	0	0		0
GRMZM2G074293	no expression	0	0	0	0		0
GRMZM2G074416	no expression	0	0	0	0		0
GRMZM2G074835	no expression	0	0	0	0		0
GRMZM2G074844	no expression	0	0	0	0		0
GRMZM2G074971	no expression	0	0	0	0		0
GRMZM2G074994	no expression	0	0	0	0		0
GRMZM2G075008	no expression	0	0	0	0		0
GRMZM2G075144	no expression	0	0	0	0		0
GRMZM2G075366	no expression	0	0	0	0		0
GRMZM2G075415	no expression	0	0	0	0		0
GRMZM2G076056	no expression	0	0	0	0		0
GRMZM2G076318	no expression	0	0	0	0		0
GRMZM2G076356	no expression	0	0	0	0		0
GRMZM2G076398	no expression	0	0	0	0		0
GRMZM2G076529	no expression	0	0	0	0		0
GRMZM2G076747	no expression	0	0	0	0		0
GRMZM2G076951	no expression	0	0	0	0		0
GRMZM2G077106	no expression	0	0	0	0		0
GRMZM2G077140	no expression	0	0	0	0		0
GRMZM2G077336	no expression	0	0	0	0		0
GRMZM2G077400	no expression	0	0	0	0		0
GRMZM2G077428	no expression	0	0	0	0		0
GRMZM2G077696	no expression	0	0	0	0		0
GRMZM2G078246	no expression	0	0	0	0		0
GRMZM2G078424	no expression	0	0	0	0		0
GRMZM2G078509	no expression	0	0	0	0		0
GRMZM2G078799	no expression	0	0	0	0		0
GRMZM2G078955	no expression	0	0	0	0		0
GRMZM2G079003	no expression	0	0	0	0		0
GRMZM2G079098	no expression	0	0	0	0		0
GRMZM2G079162	no expression	0	0	0	0		0
GRMZM2G079376	no expression	0	0	0	0		0
GRMZM2G080135	no expression	0	0	0	0		0
GRMZM2G080263	no expression	0	0	0	0		0
GRMZM2G080546	no expression	0	0	0	0		0
GRMZM2G080885	no expression	0	0	0	0		0
GRMZM2G080906	no expression	0	0	0	0		0
GRMZM2G081263	no expression	0	0	0	0		0
GRMZM2G081318	no expression	0	0	0	0		0
GRMZM2G081583	no expression	0	0	0	0		0
GRMZM2G081614	no expression	0	0	0	0		0
GRMZM2G081685	no expression	0	0	0	0		0
GRMZM2G081912	no expression	0	0	0	0		0
GRMZM2G081963	no expression	0	0	0	0		0
GRMZM2G082079	no expression	0	0	0	0		0
GRMZM2G082184	no expression	0	0	0	0		0
GRMZM2G082646	no expression	0	0	0	0		0
GRMZM2G082785	no expression	0	0	0	0		0
GRMZM2G082799	no expression	0	0	0	0		0
GRMZM2G082898	no expression	0	0	0	0		0
GRMZM2G082972	no expression	0	0	0	0		0
GRMZM2G083042	no expression	0	0	0	0		0
GRMZM2G083053	no expression	0	0	0	0		0
GRMZM2G083072	no expression	0	0	0	0		0
GRMZM2G083268	no expression	0	0	0	0		0
GRMZM2G083822	no expression	0	0	0	0		0
GRMZM2G084421	no expression	0	0	0	0		0
GRMZM2G084457	no expression	0	0	0	0		0
GRMZM2G084496	no expression	0	0	0	0		0
GRMZM2G084570	no expression	0	0	0	0		0
GRMZM2G084716	no expression	0	0	0	0		0
GRMZM2G084914	no expression	0	0	0	0		0
GRMZM2G085022	no expression	0	0	0	0		0
GRMZM2G085136	no expression	0	0	0	0		0
GRMZM2G085194	no expression	0	0	0	0		0
GRMZM2G085243	no expression	0	0	0	0		0
GRMZM2G085255	no expression	0	0	0	0		0
GRMZM2G085279	no expression	0	0	0	0		0
GRMZM2G085508	no expression	0	0	0	0		0
GRMZM2G086027	no expression	0	0	0	0		0
GRMZM2G086045	no expression	0	0	0	0		0
GRMZM2G086308	no expression	0	0	0	0		0
GRMZM2G086437	no expression	0	0	0	0		0
GRMZM2G086952	no expression	0	0	0	0		0
GRMZM2G087083	no expression	0	0	0	0		0
GRMZM2G087364	no expression	0	0	0	0		0
GRMZM2G087406	no expression	0	0	0	0		0
GRMZM2G087413	no expression	0	0	0	0		0
GRMZM2G087445	no expression	0	0	0	0		0
GRMZM2G087484	no expression	0	0	0	0		0
GRMZM2G087525	no expression	0	0	0	0		0
GRMZM2G087585	no expression	0	0	0	0		0
GRMZM2G087679	no expression	0	0	0	0		0
GRMZM2G087724	no expression	0	0	0	0		0
GRMZM2G087966	no expression	0	0	0	0		0
GRMZM2G088007	no expression	0	0	0	0		0
GRMZM2G088121	no expression	0	0	0	0		0
GRMZM2G088273	no expression	0	0	0	0		0
GRMZM2G088365	no expression	0	0	0	0		0
GRMZM2G088415	no expression	0	0	0	0		0
GRMZM2G088793	no expression	0	0	0	0		0
GRMZM2G088896	no expression	0	0	0	0		0
GRMZM2G088994	no expression	0	0	0	0		0
GRMZM2G089001	no expression	0	0	0	0		0
GRMZM2G089017	no expression	0	0	0	0		0
GRMZM2G089029	no expression	0	0	0	0		0
GRMZM2G089266	no expression	0	0	0	0		0
GRMZM2G089599	no expression	0	0	0	0		0
GRMZM2G089830	no expression	0	0	0	0		0
GRMZM2G089860	no expression	0	0	0	0		0
GRMZM2G090025	no expression	0	0	0	0		0
GRMZM2G090063	no expression	0	0	0	0		0
GRMZM2G090122	no expression	0	0	0	0		0
GRMZM2G090163	no expression	0	0	0	0		0
GRMZM2G090414	no expression	0	0	0	0		0
GRMZM2G090469	no expression	0	0	0	0		0
GRMZM2G090531	no expression	0	0	0	0		0
GRMZM2G091061	no expression	0	0	0	0		0
GRMZM2G091445	no expression	0	0	0	0		0
GRMZM2G091448	no expression	0	0	0	0		0
GRMZM2G091635	no expression	0	0	0	0		0
GRMZM2G091653	no expression	0	0	0	0		0
GRMZM2G091956	no expression	0	0	0	0		0
GRMZM2G092142	no expression	0	0	0	0		0
GRMZM2G092592	no expression	0	0	0	0		0
GRMZM2G092644	no expression	0	0	0	0		0
GRMZM2G093070	no expression	0	0	0	0		0
GRMZM2G093111	no expression	0	0	0	0		0
GRMZM2G093132	no expression	0	0	0	0		0
GRMZM2G093341	no expression	0	0	0	0		0
GRMZM2G093346	no expression	0	0	0	0		0
GRMZM2G093372	no expression	0	0	0	0		0
GRMZM2G093446	no expression	0	0	0	0		0
GRMZM2G093449	no expression	0	0	0	0		0
GRMZM2G093479	no expression	0	0	0	0		0
GRMZM2G093501	no expression	0	0	0	0		0
GRMZM2G093729	no expression	0	0	0	0		0
GRMZM2G093753	no expression	0	0	0	0		0
GRMZM2G093838	no expression	0	0	0	0		0
GRMZM2G093997	no expression	0	0	0	0		0
GRMZM2G094054	no expression	0	0	0	0		0
GRMZM2G094126	no expression	0	0	0	0		0
GRMZM2G094269	no expression	0	0	0	0		0
GRMZM2G094404	no expression	0	0	0	0		0
GRMZM2G094692	no expression	0	0	0	0		0
GRMZM2G094703	no expression	0	0	0	0		0
GRMZM2G094713	no expression	0	0	0	0		0
GRMZM2G094811	no expression	0	0	0	0		0
GRMZM2G095366	no expression	0	0	0	0		0
GRMZM2G096026	no expression	0	0	0	0		0
GRMZM2G096100	no expression	0	0	0	0		0
GRMZM2G096264	no expression	0	0	0	0		0
GRMZM2G096281	no expression	0	0	0	0		0
GRMZM2G096553	no expression	0	0	0	0		0
GRMZM2G096577	no expression	0	0	0	0		0
GRMZM2G096868	no expression	0	0	0	0		0
GRMZM2G097034	no expression	0	0	0	0		0
GRMZM2G097132	no expression	0	0	0	0		0
GRMZM2G097353	no expression	0	0	0	0		0
GRMZM2G097406	no expression	0	0	0	0		0
GRMZM2G097468	no expression	0	0	0	0		0
GRMZM2G097618	no expression	0	0	0	0		0
GRMZM2G097623	no expression	0	0	0	0		0
GRMZM2G097628	no expression	0	0	0	0		0
GRMZM2G097651	no expression	0	0	0	0		0
GRMZM2G097667	no expression	0	0	0	0		0
GRMZM2G097770	no expression	0	0	0	0		0
GRMZM2G097789	no expression	0	0	0	0		0
GRMZM2G097929	no expression	0	0	0	0		0
GRMZM2G098226	no expression	0	0	0	0		0
GRMZM2G098796	no expression	0	0	0	0		0
GRMZM2G098840	no expression	0	0	0	0		0
GRMZM2G099064	no expression	0	0	0	0		0
GRMZM2G099687	no expression	0	0	0	0		0
GRMZM2G099737	no expression	0	0	0	0		0
GRMZM2G099854	no expression	0	0	0	0		0
GRMZM2G099867	no expression	0	0	0	0		0
GRMZM2G100086	no expression	0	0	0	0		0
GRMZM2G100295	no expression	0	0	0	0		0
GRMZM2G100519	no expression	0	0	0	0		0
GRMZM2G100700	no expression	0	0	0	0		0
GRMZM2G100979	no expression	0	0	0	0		0
GRMZM2G101052	no expression	0	0	0	0		0
GRMZM2G101342	no expression	0	0	0	0		0
GRMZM2G101497	no expression	0	0	0	0		0
GRMZM2G101553	no expression	0	0	0	0		0
GRMZM2G101584	no expression	0	0	0	0		0
GRMZM2G101675	no expression	0	0	0	0		0
GRMZM2G101702	no expression	0	0	0	0		0
GRMZM2G101806	no expression	0	0	0	0		0
GRMZM2G101932	no expression	0	0	0	0		0
GRMZM2G102598	no expression	0	0	0	0		0
GRMZM2G102622	no expression	0	0	0	0		0
GRMZM2G102634	no expression	0	0	0	0		0
GRMZM2G102811	no expression	0	0	0	0		0
GRMZM2G102927	no expression	0	0	0	0		0
GRMZM2G103103	no expression	0	0	0	0		0
GRMZM2G103292	no expression	0	0	0	0		0
GRMZM2G103445	no expression	0	0	0	0		0
GRMZM2G103881	no expression	0	0	0	0		0
GRMZM2G104401	no expression	0	0	0	0		0
GRMZM2G104549	no expression	0	0	0	0		0
GRMZM2G104722	no expression	0	0	0	0		0
GRMZM2G105069	no expression	0	0	0	0		0
GRMZM2G105180	no expression	0	0	0	0		0
GRMZM2G105723	no expression	0	0	0	0		0
GRMZM2G105940	no expression	0	0	0	0		0
GRMZM2G105971	no expression	0	0	0	0		0
GRMZM2G106241	no expression	0	0	0	0		0
GRMZM2G106280	no expression	0	0	0	0		0
GRMZM2G106324	no expression	0	0	0	0		0
GRMZM2G106631	no expression	0	0	0	0		0
GRMZM2G106807	no expression	0	0	0	0		0
GRMZM2G106883	no expression	0	0	0	0		0
GRMZM2G106985	no expression	0	0	0	0		0
GRMZM2G107026	no expression	0	0	0	0		0
GRMZM2G107106	no expression	0	0	0	0		0
GRMZM2G107121	no expression	0	0	0	0		0
GRMZM2G107302	no expression	0	0	0	0		0
GRMZM2G107328	no expression	0	0	0	0		0
GRMZM2G107440	no expression	0	0	0	0		0
GRMZM2G107469	no expression	0	0	0	0		0
GRMZM2G107501	no expression	0	0	0	0		0
GRMZM2G107672	no expression	0	0	0	0		0
GRMZM2G107900	no expression	0	0	0	0		0
GRMZM2G107922	no expression	0	0	0	0		0
GRMZM2G107938	no expression	0	0	0	0		0
GRMZM2G108251	no expression	0	0	0	0		0
GRMZM2G108316	no expression	0	0	0	0		0
GRMZM2G108362	no expression	0	0	0	0		0
GRMZM2G108467	no expression	0	0	0	0		0
GRMZM2G108482	no expression	0	0	0	0		0
GRMZM2G108772	no expression	0	0	0	0		0
GRMZM2G108782	no expression	0	0	0	0		0
GRMZM2G108818	no expression	0	0	0	0		0
GRMZM2G108833	no expression	0	0	0	0		0
GRMZM2G108851	no expression	0	0	0	0		0
GRMZM2G108859	no expression	0	0	0	0		0
GRMZM2G108864	no expression	0	0	0	0		0
GRMZM2G108875	no expression	0	0	0	0		0
GRMZM2G108884	no expression	0	0	0	0		0
GRMZM2G108904	no expression	0	0	0	0		0
GRMZM2G109388	no expression	0	0	0	0		0
GRMZM2G109418	no expression	0	0	0	0		0
GRMZM2G109489	no expression	0	0	0	0		0
GRMZM2G109546	no expression	0	0	0	0		0
GRMZM2G109605	no expression	0	0	0	0		0
GRMZM2G109740	no expression	0	0	0	0		0
GRMZM2G109812	no expression	0	0	0	0		0
GRMZM2G109848	no expression	0	0	0	0		0
GRMZM2G109873	no expression	0	0	0	0		0
GRMZM2G110013	no expression	0	0	0	0		0
GRMZM2G110034	no expression	0	0	0	0		0
GRMZM2G110080	no expression	0	0	0	0		0
GRMZM2G110131	no expression	0	0	0	0		0
GRMZM2G110172	no expression	0	0	0	0		0
GRMZM2G110286	no expression	0	0	0	0		0
GRMZM2G110409	no expression	0	0	0	0		0
GRMZM2G110439	no expression	0	0	0	0		0
GRMZM2G110447	no expression	0	0	0	0		0
GRMZM2G110553	no expression	0	0	0	0		0
GRMZM2G110731	no expression	0	0	0	0		0
GRMZM2G110847	no expression	0	0	0	0		0
GRMZM2G110865	no expression	0	0	0	0		0
GRMZM2G111622	no expression	0	0	0	0		0
GRMZM2G111696	no expression	0	0	0	0		0
GRMZM2G111710	no expression	0	0	0	0		0
GRMZM2G111794	no expression	0	0	0	0		0
GRMZM2G111898	no expression	0	0	0	0		0
GRMZM2G111987	no expression	0	0	0	0		0
GRMZM2G112015	no expression	0	0	0	0		0
GRMZM2G112030	no expression	0	0	0	0		0
GRMZM2G112190	no expression	0	0	0	0		0
GRMZM2G112204	no expression	0	0	0	0		0
GRMZM2G112263	no expression	0	0	0	0		0
GRMZM2G112278	no expression	0	0	0	0		0
GRMZM2G112374	no expression	0	0	0	0		0
GRMZM2G112628	no expression	0	0	0	0		0
GRMZM2G112769	no expression	0	0	0	0		0
GRMZM2G112988	no expression	0	0	0	0		0
GRMZM2G113260	no expression	0	0	0	0		0
GRMZM2G113400	no expression	0	0	0	0		0
GRMZM2G113425	no expression	0	0	0	0		0
GRMZM2G113624	no expression	0	0	0	0		0
GRMZM2G113697	no expression	0	0	0	0		0
GRMZM2G113848	no expression	0	0	0	0		0
GRMZM2G113883	no expression	0	0	0	0		0
GRMZM2G113902	no expression	0	0	0	0		0
GRMZM2G114129	no expression	0	0	0	0		0
GRMZM2G114427	no expression	0	0	0	0		0
GRMZM2G114486	no expression	0	0	0	0		0
GRMZM2G114725	no expression	0	0	0	0		0
GRMZM2G114844	no expression	0	0	0	0		0
GRMZM2G114945	no expression	0	0	0	0		0
GRMZM2G114952	no expression	0	0	0	0		0
GRMZM2G115077	no expression	0	0	0	0		0
GRMZM2G115112	no expression	0	0	0	0		0
GRMZM2G115127	no expression	0	0	0	0		0
GRMZM2G115340	no expression	0	0	0	0		0
GRMZM2G115566	no expression	0	0	0	0		0
GRMZM2G115637	no expression	0	0	0	0		0
GRMZM2G115870	no expression	0	0	0	0		0
GRMZM2G115916	no expression	0	0	0	0		0
GRMZM2G115972	no expression	0	0	0	0		0
GRMZM2G116212	no expression	0	0	0	0		0
GRMZM2G116411	no expression	0	0	0	0		0
GRMZM2G116460	no expression	0	0	0	0		0
GRMZM2G116592	no expression	0	0	0	0		0
GRMZM2G116635	no expression	0	0	0	0		0
GRMZM2G116858	no expression	0	0	0	0		0
GRMZM2G116990	no expression	0	0	0	0		0
GRMZM2G117430	no expression	0	0	0	0		0
GRMZM2G117436	no expression	0	0	0	0		0
GRMZM2G117444	no expression	0	0	0	0		0
GRMZM2G117556	no expression	0	0	0	0		0
GRMZM2G117648	no expression	0	0	0	0		0
GRMZM2G117677	no expression	0	0	0	0		0
GRMZM2G117858	no expression	0	0	0	0		0
GRMZM2G117872	no expression	0	0	0	0		0
GRMZM2G117988	no expression	0	0	0	0		0
GRMZM2G118119	no expression	0	0	0	0		0
GRMZM2G118191	no expression	0	0	0	0		0
GRMZM2G118269	no expression	0	0	0	0		0
GRMZM2G118503	no expression	0	0	0	0		0
GRMZM2G118529	no expression	0	0	0	0		0
GRMZM2G118558	no expression	0	0	0	0		0
GRMZM2G118586	no expression	0	0	0	0		0
GRMZM2G118786	no expression	0	0	0	0		0
GRMZM2G118834	no expression	0	0	0	0		0
GRMZM2G119105	no expression	0	0	0	0		0
GRMZM2G119180	no expression	0	0	0	0		0
GRMZM2G119375	no expression	0	0	0	0		0
GRMZM2G119475	no expression	0	0	0	0		0
GRMZM2G119635	no expression	0	0	0	0		0
GRMZM2G119881	no expression	0	0	0	0		0
GRMZM2G120298	no expression	0	0	0	0		0
GRMZM2G120308	no expression	0	0	0	0		0
GRMZM2G120362	no expression	0	0	0	0		0
GRMZM2G120401	no expression	0	0	0	0		0
GRMZM2G120449	no expression	0	0	0	0		0
GRMZM2G120463	no expression	0	0	0	0		0
GRMZM2G120794	no expression	0	0	0	0		0
GRMZM2G121395	no expression	0	0	0	0		0
GRMZM2G121631	no expression	0	0	0	0		0
GRMZM2G121897	no expression	0	0	0	0		0
GRMZM2G121992	no expression	0	0	0	0		0
GRMZM2G122021	no expression	0	0	0	0		0
GRMZM2G122160	no expression	0	0	0	0		0
GRMZM2G122488	no expression	0	0	0	0		0
GRMZM2G122563	no expression	0	0	0	0		0
GRMZM2G122670	no expression	0	0	0	0		0
GRMZM2G122708	no expression	0	0	0	0		0
GRMZM2G122717	no expression	0	0	0	0		0
GRMZM2G122727	no expression	0	0	0	0		0
GRMZM2G122734	no expression	0	0	0	0		0
GRMZM2G122740	no expression	0	0	0	0		0
GRMZM2G123065	no expression	0	0	0	0		0
GRMZM2G123097	no expression	0	0	0	0		0
GRMZM2G123178	no expression	0	0	0	0		0
GRMZM2G123390	no expression	0	0	0	0		0
GRMZM2G123514	no expression	0	0	0	0		0
GRMZM2G123595	no expression	0	0	0	0		0
GRMZM2G123614	no expression	0	0	0	0		0
GRMZM2G123654	no expression	0	0	0	0		0
GRMZM2G123774	no expression	0	0	0	0		0
GRMZM2G123794	no expression	0	0	0	0		0
GRMZM2G123804	no expression	0	0	0	0		0
GRMZM2G124293	no expression	0	0	0	0		0
GRMZM2G124357	no expression	0	0	0	0		0
GRMZM2G124555	no expression	0	0	0	0		0
GRMZM2G124708	no expression	0	0	0	0		0
GRMZM2G124794	no expression	0	0	0	0		0
GRMZM2G124921	no expression	0	0	0	0		0
GRMZM2G125092	no expression	0	0	0	0		0
GRMZM2G125151	no expression	0	0	0	0		0
GRMZM2G125201	no expression	0	0	0	0		0
GRMZM2G125359	no expression	0	0	0	0		0
GRMZM2G125449	no expression	0	0	0	0		0
GRMZM2G125504	no expression	0	0	0	0		0
GRMZM2G125575	no expression	0	0	0	0		0
GRMZM2G125738	no expression	0	0	0	0		0
GRMZM2G126204	no expression	0	0	0	0		0
GRMZM2G126214	no expression	0	0	0	0		0
GRMZM2G126216	no expression	0	0	0	0		0
GRMZM2G126264	no expression	0	0	0	0		0
GRMZM2G126309	no expression	0	0	0	0		0
GRMZM2G126402	no expression	0	0	0	0		0
GRMZM2G126555	no expression	0	0	0	0		0
GRMZM2G126827	no expression	0	0	0	0		0
GRMZM2G127104	no expression	0	0	0	0		0
GRMZM2G127236	no expression	0	0	0	0		0
GRMZM2G127329	no expression	0	0	0	0		0
GRMZM2G127661	no expression	0	0	0	0		0
GRMZM2G127812	no expression	0	0	0	0		0
GRMZM2G127850	no expression	0	0	0	0		0
GRMZM2G127999	no expression	0	0	0	0		0
GRMZM2G128215	no expression	0	0	0	0		0
GRMZM2G128616	no expression	0	0	0	0		0
GRMZM2G128648	no expression	0	0	0	0		0
GRMZM2G128724	no expression	0	0	0	0		0
GRMZM2G128731	no expression	0	0	0	0		0
GRMZM2G128748	no expression	0	0	0	0		0
GRMZM2G128754	no expression	0	0	0	0		0
GRMZM2G128800	no expression	0	0	0	0		0
GRMZM2G128832	no expression	0	0	0	0		0
GRMZM2G128923	no expression	0	0	0	0		0
GRMZM2G129508	no expression	0	0	0	0		0
GRMZM2G129681	no expression	0	0	0	0		0
GRMZM2G129872	no expression	0	0	0	0		0
GRMZM2G129979	no expression	0	0	0	0		0
GRMZM2G130076	no expression	0	0	0	0		0
GRMZM2G130343	no expression	0	0	0	0		0
GRMZM2G130401	no expression	0	0	0	0		0
GRMZM2G130640	no expression	0	0	0	0		0
GRMZM2G131135	no expression	0	0	0	0		0
GRMZM2G131228	no expression	0	0	0	0		0
GRMZM2G131356	no expression	0	0	0	0		0
GRMZM2G131440	no expression	0	0	0	0		0
GRMZM2G131928	no expression	0	0	0	0		0
GRMZM2G132095	no expression	0	0	0	0		0
GRMZM2G132110	no expression	0	0	0	0		0
GRMZM2G132248	no expression	0	0	0	0		0
GRMZM2G132340	no expression	0	0	0	0		0
GRMZM2G132595	no expression	0	0	0	0		0
GRMZM2G132647	no expression	0	0	0	0		0
GRMZM2G133067	no expression	0	0	0	0		0
GRMZM2G133113	no expression	0	0	0	0		0
GRMZM2G133233	no expression	0	0	0	0		0
GRMZM2G133370	no expression	0	0	0	0		0
GRMZM2G133401	no expression	0	0	0	0		0
GRMZM2G133454	no expression	0	0	0	0		0
GRMZM2G133867	no expression	0	0	0	0		0
GRMZM2G134049	no expression	0	0	0	0		0
GRMZM2G134194	no expression	0	0	0	0		0
GRMZM2G134325	no expression	0	0	0	0		0
GRMZM2G134402	no expression	0	0	0	0		0
GRMZM2G134484	no expression	0	0	0	0		0
GRMZM2G134582	no expression	0	0	0	0		0
GRMZM2G134634	no expression	0	0	0	0		0
GRMZM2G134660	no expression	0	0	0	0		0
GRMZM2G135039	no expression	0	0	0	0		0
GRMZM2G135056	no expression	0	0	0	0		0
GRMZM2G135089	no expression	0	0	0	0		0
GRMZM2G135461	no expression	0	0	0	0		0
GRMZM2G135746	no expression	0	0	0	0		0
GRMZM2G135862	no expression	0	0	0	0		0
GRMZM2G136025	no expression	0	0	0	0		0
GRMZM2G136161	no expression	0	0	0	0		0
GRMZM2G136231	no expression	0	0	0	0		0
GRMZM2G136523	no expression	0	0	0	0		0
GRMZM2G136559	no expression	0	0	0	0		0
GRMZM2G136752	no expression	0	0	0	0		0
GRMZM2G137002	no expression	0	0	0	0		0
GRMZM2G137215	no expression	0	0	0	0		0
GRMZM2G137289	no expression	0	0	0	0		0
GRMZM2G137308	no expression	0	0	0	0		0
GRMZM2G137518	no expression	0	0	0	0		0
GRMZM2G137575	no expression	0	0	0	0		0
GRMZM2G137584	no expression	0	0	0	0		0
GRMZM2G137648	no expression	0	0	0	0		0
GRMZM2G137697	no expression	0	0	0	0		0
GRMZM2G137751	no expression	0	0	0	0		0
GRMZM2G137923	no expression	0	0	0	0		0
GRMZM2G137959	no expression	0	0	0	0		0
GRMZM2G137974	no expression	0	0	0	0		0
GRMZM2G138365	no expression	0	0	0	0		0
GRMZM2G138666	no expression	0	0	0	0		0
GRMZM2G138701	no expression	0	0	0	0		0
GRMZM2G138999	no expression	0	0	0	0		0
GRMZM2G139183	no expression	0	0	0	0		0
GRMZM2G139256	no expression	0	0	0	0		0
GRMZM2G139431	no expression	0	0	0	0		0
GRMZM2G139458	no expression	0	0	0	0		0
GRMZM2G139513	no expression	0	0	0	0		0
GRMZM2G139886	no expression	0	0	0	0		0
GRMZM2G140033	no expression	0	0	0	0		0
GRMZM2G140209	no expression	0	0	0	0		0
GRMZM2G140317	no expression	0	0	0	0		0
GRMZM2G140408	no expression	0	0	0	0		0
GRMZM2G140427	no expression	0	0	0	0		0
GRMZM2G140517	no expression	0	0	0	0		0
GRMZM2G140665	no expression	0	0	0	0		0
GRMZM2G140728	no expression	0	0	0	0		0
GRMZM2G140803	no expression	0	0	0	0		0
GRMZM2G141066	no expression	0	0	0	0		0
GRMZM2G141205	no expression	0	0	0	0		0
GRMZM2G141456	no expression	0	0	0	0		0
GRMZM2G141491	no expression	0	0	0	0		0
GRMZM2G141667	no expression	0	0	0	0		0
GRMZM2G141738	no expression	0	0	0	0		0
GRMZM2G141774	no expression	0	0	0	0		0
GRMZM2G141814	no expression	0	0	0	0		0
GRMZM2G142109	no expression	0	0	0	0		0
GRMZM2G142214	no expression	0	0	0	0		0
GRMZM2G142261	no expression	0	0	0	0		0
GRMZM2G142967	no expression	0	0	0	0		0
GRMZM2G143010	no expression	0	0	0	0		0
GRMZM2G143075	no expression	0	0	0	0		0
GRMZM2G143182	no expression	0	0	0	0		0
GRMZM2G143278	no expression	0	0	0	0		0
GRMZM2G143332	no expression	0	0	0	0		0
GRMZM2G143530	no expression	0	0	0	0		0
GRMZM2G143699	no expression	0	0	0	0		0
GRMZM2G143769	no expression	0	0	0	0		0
GRMZM2G143786	no expression	0	0	0	0		0
GRMZM2G144011	no expression	0	0	0	0		0
GRMZM2G144343	no expression	0	0	0	0		0
GRMZM2G144380	no expression	0	0	0	0		0
GRMZM2G144476	no expression	0	0	0	0		0
GRMZM2G144606	no expression	0	0	0	0		0
GRMZM2G144856	no expression	0	0	0	0		0
GRMZM2G144915	no expression	0	0	0	0		0
GRMZM2G144948	no expression	0	0	0	0		0
GRMZM2G145069	no expression	0	0	0	0		0
GRMZM2G145095	no expression	0	0	0	0		0
GRMZM2G145179	no expression	0	0	0	0		0
GRMZM2G145305	no expression	0	0	0	0		0
GRMZM2G145544	no expression	0	0	0	0		0
GRMZM2G145558	no expression	0	0	0	0		0
GRMZM2G145599	no expression	0	0	0	0		0
GRMZM2G145799	no expression	0	0	0	0		0
GRMZM2G146097	no expression	0	0	0	0		0
GRMZM2G146158	no expression	0	0	0	0		0
GRMZM2G146209	no expression	0	0	0	0		0
GRMZM2G146315	no expression	0	0	0	0		0
GRMZM2G146541	no expression	0	0	0	0		0
GRMZM2G146623	no expression	0	0	0	0		0
GRMZM2G146926	no expression	0	0	0	0		0
GRMZM2G146945	no expression	0	0	0	0		0
GRMZM2G147041	no expression	0	0	0	0		0
GRMZM2G147112	no expression	0	0	0	0		0
GRMZM2G147322	no expression	0	0	0	0		0
GRMZM2G147362	no expression	0	0	0	0		0
GRMZM2G147373	no expression	0	0	0	0		0
GRMZM2G147443	no expression	0	0	0	0		0
GRMZM2G147572	no expression	0	0	0	0		0
GRMZM2G147589	no expression	0	0	0	0		0
GRMZM2G147608	no expression	0	0	0	0		0
GRMZM2G147937	no expression	0	0	0	0		0
GRMZM2G148014	no expression	0	0	0	0		0
GRMZM2G148026	no expression	0	0	0	0		0
GRMZM2G148126	no expression	0	0	0	0		0
GRMZM2G148508	no expression	0	0	0	0		0
GRMZM2G148619	no expression	0	0	0	0		0
GRMZM2G148626	no expression	0	0	0	0		0
GRMZM2G148768	no expression	0	0	0	0		0
GRMZM2G148835	no expression	0	0	0	0		0
GRMZM2G149182	no expression	0	0	0	0		0
GRMZM2G149204	no expression	0	0	0	0		0
GRMZM2G149449	no expression	0	0	0	0		0
GRMZM2G149836	no expression	0	0	0	0		0
GRMZM2G149930	no expression	0	0	0	0		0
GRMZM2G150122	no expression	0	0	0	0		0
GRMZM2G150128	no expression	0	0	0	0		0
GRMZM2G150153	no expression	0	0	0	0		0
GRMZM2G150167	no expression	0	0	0	0		0
GRMZM2G150208	no expression	0	0	0	0		0
GRMZM2G150404	no expression	0	0	0	0		0
GRMZM2G150574	no expression	0	0	0	0		0
GRMZM2G150706	no expression	0	0	0	0		0
GRMZM2G150776	no expression	0	0	0	0		0
GRMZM2G150930	no expression	0	0	0	0		0
GRMZM2G151162	no expression	0	0	0	0		0
GRMZM2G151273	no expression	0	0	0	0		0
GRMZM2G151397	no expression	0	0	0	0		0
GRMZM2G151459	no expression	0	0	0	0		0
GRMZM2G151476	no expression	0	0	0	0		0
GRMZM2G151644	no expression	0	0	0	0		0
GRMZM2G151720	no expression	0	0	0	0		0
GRMZM2G152279	no expression	0	0	0	0		0
GRMZM2G152317	no expression	0	0	0	0		0
GRMZM2G152390	no expression	0	0	0	0		0
GRMZM2G152463	no expression	0	0	0	0		0
GRMZM2G152655	no expression	0	0	0	0		0
GRMZM2G152689	no expression	0	0	0	0		0
GRMZM2G152958	no expression	0	0	0	0		0
GRMZM2G153262	no expression	0	0	0	0		0
GRMZM2G153336	no expression	0	0	0	0		0
GRMZM2G153404	no expression	0	0	0	0		0
GRMZM2G153414	no expression	0	0	0	0		0
GRMZM2G153531	no expression	0	0	0	0		0
GRMZM2G153635	no expression	0	0	0	0		0
GRMZM2G153799	no expression	0	0	0	0		0
GRMZM2G153803	no expression	0	0	0	0		0
GRMZM2G153814	no expression	0	0	0	0		0
GRMZM2G153925	no expression	0	0	0	0		0
GRMZM2G154014	no expression	0	0	0	0		0
GRMZM2G154041	no expression	0	0	0	0		0
GRMZM2G154045	no expression	0	0	0	0		0
GRMZM2G154056	no expression	0	0	0	0		0
GRMZM2G154235	no expression	0	0	0	0		0
GRMZM2G154389	no expression	0	0	0	0		0
GRMZM2G154484	no expression	0	0	0	0		0
GRMZM2G154665	no expression	0	0	0	0		0
GRMZM2G154830	no expression	0	0	0	0		0
GRMZM2G154878	no expression	0	0	0	0		0
GRMZM2G155177	no expression	0	0	0	0		0
GRMZM2G155221	no expression	0	0	0	0		0
GRMZM2G155380	no expression	0	0	0	0		0
GRMZM2G155506	no expression	0	0	0	0		0
GRMZM2G155555	no expression	0	0	0	0		0
GRMZM2G155602	no expression	0	0	0	0		0
GRMZM2G156044	no expression	0	0	0	0		0
GRMZM2G156367	no expression	0	0	0	0		0
GRMZM2G156409	no expression	0	0	0	0		0
GRMZM2G156536	no expression	0	0	0	0		0
GRMZM2G156621	no expression	0	0	0	0		0
GRMZM2G156952	no expression	0	0	0	0		0
GRMZM2G156983	no expression	0	0	0	0		0
GRMZM2G157016	no expression	0	0	0	0		0
GRMZM2G157026	no expression	0	0	0	0		0
GRMZM2G157046	no expression	0	0	0	0		0
GRMZM2G157068	no expression	0	0	0	0		0
GRMZM2G157078	no expression	0	0	0	0		0
GRMZM2G157126	no expression	0	0	0	0		0
GRMZM2G157357	no expression	0	0	0	0		0
GRMZM2G157364	no expression	0	0	0	0		0
GRMZM2G157649	no expression	0	0	0	0		0
GRMZM2G157781	no expression	0	0	0	0		0
GRMZM2G158279	no expression	0	0	0	0		0
GRMZM2G158298	no expression	0	0	0	0		0
GRMZM2G158308	no expression	0	0	0	0		0
GRMZM2G158333	no expression	0	0	0	0		0
GRMZM2G158400	no expression	0	0	0	0		0
GRMZM2G158407	no expression	0	0	0	0		0
GRMZM2G158555	no expression	0	0	0	0		0
GRMZM2G158717	no expression	0	0	0	0		0
GRMZM2G158729	no expression	0	0	0	0		0
GRMZM2G158838	no expression	0	0	0	0		0
GRMZM2G158848	no expression	0	0	0	0		0
GRMZM2G158854	no expression	0	0	0	0		0
GRMZM2G159709	no expression	0	0	0	0		0
GRMZM2G159931	no expression	0	0	0	0		0
GRMZM2G160178	no expression	0	0	0	0		0
GRMZM2G160334	no expression	0	0	0	0		0
GRMZM2G160391	no expression	0	0	0	0		0
GRMZM2G160526	no expression	0	0	0	0		0
GRMZM2G160626	no expression	0	0	0	0		0
GRMZM2G160763	no expression	0	0	0	0		0
GRMZM2G160812	no expression	0	0	0	0		0
GRMZM2G160925	no expression	0	0	0	0		0
GRMZM2G161447	no expression	0	0	0	0		0
GRMZM2G161579	no expression	0	0	0	0		0
GRMZM2G161735	no expression	0	0	0	0		0
GRMZM2G161768	no expression	0	0	0	0		0
GRMZM2G161908	no expression	0	0	0	0		0
GRMZM2G161959	no expression	0	0	0	0		0
GRMZM2G162112	no expression	0	0	0	0		0
GRMZM2G162246	no expression	0	0	0	0		0
GRMZM2G162267	no expression	0	0	0	0		0
GRMZM2G162319	no expression	0	0	0	0		0
GRMZM2G162456	no expression	0	0	0	0		0
GRMZM2G162546	no expression	0	0	0	0		0
GRMZM2G162574	no expression	0	0	0	0		0
GRMZM2G162675	no expression	0	0	0	0		0
GRMZM2G162677	no expression	0	0	0	0		0
GRMZM2G162680	no expression	0	0	0	0		0
GRMZM2G162845	no expression	0	0	0	0		0
GRMZM2G162859	no expression	0	0	0	0		0
GRMZM2G163184	no expression	0	0	0	0		0
GRMZM2G163185	no expression	0	0	0	0		0
GRMZM2G163224	no expression	0	0	0	0		0
GRMZM2G163323	no expression	0	0	0	0		0
GRMZM2G163409	no expression	0	0	0	0		0
GRMZM2G163546	no expression	0	0	0	0		0
GRMZM2G163557	no expression	0	0	0	0		0
GRMZM2G163574	no expression	0	0	0	0		0
GRMZM2G163679	no expression	0	0	0	0		0
GRMZM2G163830	no expression	0	0	0	0		0
GRMZM2G164084	no expression	0	0	0	0		0
GRMZM2G164248	no expression	0	0	0	0		0
GRMZM2G164297	no expression	0	0	0	0		0
GRMZM2G164311	no expression	0	0	0	0		0
GRMZM2G164467	no expression	0	0	0	0		0
GRMZM2G164478	no expression	0	0	0	0		0
GRMZM2G164486	no expression	0	0	0	0		0
GRMZM2G164785	no expression	0	0	0	0		0
GRMZM2G165013	no expression	0	0	0	0		0
GRMZM2G165069	no expression	0	0	0	0		0
GRMZM2G165083	no expression	0	0	0	0		0
GRMZM2G165086	no expression	0	0	0	0		0
GRMZM2G165149	no expression	0	0	0	0		0
GRMZM2G165216	no expression	0	0	0	0		0
GRMZM2G165217	no expression	0	0	0	0		0
GRMZM2G165220	no expression	0	0	0	0		0
GRMZM2G165257	no expression	0	0	0	0		0
GRMZM2G165320	no expression	0	0	0	0		0
GRMZM2G165638	no expression	0	0	0	0		0
GRMZM2G165655	no expression	0	0	0	0		0
GRMZM2G165734	no expression	0	0	0	0		0
GRMZM2G165775	no expression	0	0	0	0		0
GRMZM2G165839	no expression	0	0	0	0		0
GRMZM2G165930	no expression	0	0	0	0		0
GRMZM2G166124	no expression	0	0	0	0		0
GRMZM2G166612	no expression	0	0	0	0		0
GRMZM2G166642	no expression	0	0	0	0		0
GRMZM2G166782	no expression	0	0	0	0		0
GRMZM2G166899	no expression	0	0	0	0		0
GRMZM2G166940	no expression	0	0	0	0		0
GRMZM2G167088	no expression	0	0	0	0		0
GRMZM2G167101	no expression	0	0	0	0		0
GRMZM2G167521	no expression	0	0	0	0		0
GRMZM2G167560	no expression	0	0	0	0		0
GRMZM2G167898	no expression	0	0	0	0		0
GRMZM2G167941	no expression	0	0	0	0		0
GRMZM2G168065	no expression	0	0	0	0		0
GRMZM2G168097	no expression	0	0	0	0		0
GRMZM2G168123	no expression	0	0	0	0		0
GRMZM2G168326	no expression	0	0	0	0		0
GRMZM2G168516	no expression	0	0	0	0		0
GRMZM2G168675	no expression	0	0	0	0		0
GRMZM2G168809	no expression	0	0	0	0		0
GRMZM2G169012	no expression	0	0	0	0		0
GRMZM2G169024	no expression	0	0	0	0		0
GRMZM2G169236	no expression	0	0	0	0		0
GRMZM2G169241	no expression	0	0	0	0		0
GRMZM2G169295	no expression	0	0	0	0		0
GRMZM2G169341	no expression	0	0	0	0		0
GRMZM2G169376	no expression	0	0	0	0		0
GRMZM2G169702	no expression	0	0	0	0		0
GRMZM2G169749	no expression	0	0	0	0		0
GRMZM2G169962	no expression	0	0	0	0		0
GRMZM2G169990	no expression	0	0	0	0		0
GRMZM2G169991	no expression	0	0	0	0		0
GRMZM2G170027	no expression	0	0	0	0		0
GRMZM2G170191	no expression	0	0	0	0		0
GRMZM2G170255	no expression	0	0	0	0		0
GRMZM2G170391	no expression	0	0	0	0		0
GRMZM2G170581	no expression	0	0	0	0		0
GRMZM2G170716	no expression	0	0	0	0		0
GRMZM2G170915	no expression	0	0	0	0		0
GRMZM2G171110	no expression	0	0	0	0		0
GRMZM2G172153	no expression	0	0	0	0		0
GRMZM2G172174	no expression	0	0	0	0		0
GRMZM2G172300	no expression	0	0	0	0		0
GRMZM2G172443	no expression	0	0	0	0		0
GRMZM2G172555	no expression	0	0	0	0		0
GRMZM2G172982	no expression	0	0	0	0		0
GRMZM2G173023	no expression	0	0	0	0		0
GRMZM2G173049	no expression	0	0	0	0		0
GRMZM2G173198	no expression	0	0	0	0		0
GRMZM2G173344	no expression	0	0	0	0		0
GRMZM2G173521	no expression	0	0	0	0		0
GRMZM2G173532	no expression	0	0	0	0		0
GRMZM2G173658	no expression	0	0	0	0		0
GRMZM2G173809	no expression	0	0	0	0		0
GRMZM2G173862	no expression	0	0	0	0		0
GRMZM2G173911	no expression	0	0	0	0		0
GRMZM2G173926	no expression	0	0	0	0		0
GRMZM2G173960	no expression	0	0	0	0		0
GRMZM2G174083	no expression	0	0	0	0		0
GRMZM2G174087	no expression	0	0	0	0		0
GRMZM2G174140	no expression	0	0	0	0		0
GRMZM2G174312	no expression	0	0	0	0		0
GRMZM2G174430	no expression	0	0	0	0		0
GRMZM2G174658	no expression	0	0	0	0		0
GRMZM2G174854	no expression	0	0	0	0		0
GRMZM2G174888	no expression	0	0	0	0		0
GRMZM2G175101	no expression	0	0	0	0		0
GRMZM2G175351	no expression	0	0	0	0		0
GRMZM2G175383	no expression	0	0	0	0		0
GRMZM2G175755	no expression	0	0	0	0		0
GRMZM2G175804	no expression	0	0	0	0		0
GRMZM2G175861	no expression	0	0	0	0		0
GRMZM2G175912	no expression	0	0	0	0		0
GRMZM2G175983	no expression	0	0	0	0		0
GRMZM2G176042	no expression	0	0	0	0		0
GRMZM2G176060	no expression	0	0	0	0		0
GRMZM2G176280	no expression	0	0	0	0		0
GRMZM2G176306	no expression	0	0	0	0		0
GRMZM2G176355	no expression	0	0	0	0		0
GRMZM2G176363	no expression	0	0	0	0		0
GRMZM2G176384	no expression	0	0	0	0		0
GRMZM2G176474	no expression	0	0	0	0		0
GRMZM2G176604	no expression	0	0	0	0		0
GRMZM2G176660	no expression	0	0	0	0		0
GRMZM2G176750	no expression	0	0	0	0		0
GRMZM2G176778	no expression	0	0	0	0		0
GRMZM2G176798	no expression	0	0	0	0		0
GRMZM2G176940	no expression	0	0	0	0		0
GRMZM2G177451	no expression	0	0	0	0		0
GRMZM2G177490	no expression	0	0	0	0		0
GRMZM2G177620	no expression	0	0	0	0		0
GRMZM2G177721	no expression	0	0	0	0		0
GRMZM2G177755	no expression	0	0	0	0		0
GRMZM2G177760	no expression	0	0	0	0		0
GRMZM2G178176	no expression	0	0	0	0		0
GRMZM2G178239	no expression	0	0	0	0		0
GRMZM2G178470	no expression	0	0	0	0		0
GRMZM2G178536	no expression	0	0	0	0		0
GRMZM2G178554	no expression	0	0	0	0		0
GRMZM2G178942	no expression	0	0	0	0		0
GRMZM2G179248	no expression	0	0	0	0		0
GRMZM2G179259	no expression	0	0	0	0		0
GRMZM2G179317	no expression	0	0	0	0		0
GRMZM2G179445	no expression	0	0	0	0		0
GRMZM2G179536	no expression	0	0	0	0		0
GRMZM2G179610	no expression	0	0	0	0		0
GRMZM2G179651	no expression	0	0	0	0		0
[truncated: 37,660 more rows]
