# Supplementary material for: Complementation contributes to transcriptome complexity in maize (Zea mays L.) hybrids relative to their inbred parents
Source: HighWire-hosted journal article supplement (doi:10.1101/gr.138461.112), 2012-10-19
Supplement: TableS5.xlsx [file TableS5.xlsx]

## Sheet: Tabelle1
										allele-specific read counts for inbred lines																	allele-specific read numbers for reciprocal hybrids																	Total read number for all genotypes and replicates
	GeneID	genomic PAVs	SPE1 (1-3-4)	SPE2 (2-3-4)	Table 2 overlap	Table S2 BM	Table S2 MB	Table S2 overlap		REP1.B_b	REP1.B_m	REP2.B_b	REP2.B_m	REP3.B_b	REP3.B_m	REP4.B_b	REP4.B_m	REP1.M_b	REP1.M_m	REP2.M_b	REP2.M_m	REP3.M_b	REP3.M_m	REP4.M_b	REP4.M_m		REP1.BM_b	REP1.BM_m	REP2.BM_b	REP2.BM_m	REP3.BM_b	REP3.BM_m	REP4.BM_b	REP4.BM_m	REP1.MB_b	REP1.MB_m	REP2.MB_b	REP2.MB_m	REP3.MB_b	REP3.MB_m	REP4.MB_b	REP4.MB_m		REP1_B.total	REP1_M.total	REP1_BM.total	REP1_MB.total	REP2_B.total	REP2_M.total
1	AC147602.5_FG004	0	0	0	0	0	0	0		0	0	0	0	0	0	0	0	0	0	0	0	0	0	0	0		1	0	1	0	0	0	0	0	0	0	0	0	0	0	0	0		1	0	1	0	0	1
2	AC148152.3_FG001	0	0	0	0	0	0	0		0	0	1	0	1	0	0	0	0	1	0	1	1	2	0	4		0	1	0	0	0	2	0	3	0	0	0	0	0	1	0	1		3	8	7	7	4	17
3	AC148152.3_FG005	0	0	0	0	0	0	0		67	0	43	0	61	0	76	0	1	43	0	48	0	75	0	47		14	23	15	17	43	33	48	37	22	19	18	14	38	42	37	29		2323	2070	1532	1305	1533	1582
4	AC148152.3_FG006	0	0	0	0	0	0	0		0	0	0	0	0	0	1	0	0	1	0	1	0	1	0	1		0	0	0	0	0	1	0	0	0	1	0	0	0	0	0	0		2	4	4	4	1	4
5	AC148152.3_FG008	0	0	0	0	0	0	0		1	0	1	0	0	0	0	0	0	2	1	6	1	5	0	6		0	1	1	0	1	0	0	0	1	0	1	0	1	0	0	0		3	31	8	2	3	40
6	AC148167.6_FG001	0	0	0	0	1	1	1		78	1	73	0	88	0	85	1	1	68	0	67	0	67	0	93		41	33	53	34	61	39	57	28	41	44	45	29	51	36	61	38		672	743	728	754	598	655
7	AC149475.2_FG002	0	0	0	0	1	1	1		44	0	27	1	36	0	40	0	1	37	0	33	1	55	1	47		22	15	26	19	32	20	21	18	37	17	32	20	24	11	35	26		459	467	576	563	438	448
8	AC149475.2_FG003	0	0	0	0	1	1	1		83	1	79	0	73	0	80	0	0	14	0	14	0	18	0	16		41	10	39	11	54	10	46	11	41	3	40	8	55	3	53	4		1184	891	982	1026	976	743
9	AC149475.2_FG005	0	0	0	0	1	1	1		162	1	151	0	102	0	103	1	0	157	2	134	0	138	0	98		87	60	95	68	71	58	80	47	116	73	84	63	90	78	91	71		551	550	513	651	535	524
10	AC149475.2_FG007	0	0	0	0	1	0	0		30	0	24	0	35	0	26	0	0	37	1	27	0	28	0	31		8	25	9	17	17	19	28	25	18	18	13	20	8	14	15	16		245	297	321	177	214	262
11	AC149810.2_FG003	0	0	0	0	0	0	0		0	0	0	0	0	0	0	0	0	0	0	0	0	0	0	0		0	0	0	0	0	0	0	0	0	0	0	0	0	0	0	0		0	1	3	1	0	1
12	AC149810.2_FG004	0	0	0	0	0	0	0		0	0	0	0	0	0	0	0	0	0	0	0	0	0	0	0		0	0	0	0	0	0	0	0	0	0	0	0	0	0	0	0		0	0	0	0	0	0
13	AC149810.2_FG008	0	0	0	0	1	0	0		4	0	7	0	17	0	12	0	0	2	0	3	0	5	1	8		3	1	5	3	9	5	10	4	3	5	3	1	7	4	7	6		36	33	45	54	47	33
14	AC149818.2_FG001	0	0	0	0	0	0	0		0	0	0	0	0	0	0	0	0	0	0	0	0	0	0	0		0	0	0	0	0	0	0	0	0	0	0	0	0	0	0	0		258	397	298	366	267	318
15	AC149818.2_FG004	0	0	0	0	0	0	0		0	0	0	0	0	0	0	0	0	0	0	0	0	0	0	0		0	0	0	0	0	0	0	0	0	0	0	0	0	0	0	0		110	50	118	91	103	56
16	AC149818.2_FG005	0	0	0	0	0	1	0		11	0	5	0	12	0	10	0	1	4	0	2	0	5	0	10		2	4	5	3	3	5	6	1	2	1	8	1	7	1	3	2		19	8	19	11	21	14
17	AC149818.2_FG006	0	0	0	0	1	1	1		86	0	80	0	63	0	63	0	0	97	0	110	1	94	0	97		37	55	52	67	32	51	27	47	59	74	42	50	34	52	42	55		316	567	389	409	293	434
18	AC149818.2_FG007	0	0	0	0	0	1	0		1	0	7	0	2	0	3	0	1	2	0	5	0	4	0	2		5	2	3	3	4	3	2	1	4	1	5	1	3	2	2	0		24	19	31	23	22	20
19	AC149818.2_FG008	0	0	0	0	0	0	0		0	0	0	0	0	0	0	0	0	0	0	0	0	0	0	0		0	0	0	0	0	0	0	0	0	0	0	0	0	0	0	0		95	90	77	77	66	103
20	AC149818.2_FG009	0	0	0	0	1	1	1		7	1	5	0	2	0	11	0	0	5	0	2	1	3	0	5		4	1	0	2	4	0	6	1	5	6	11	2	11	4	8	1		9	6	8	16	5	4
21	AC149828.2_FG002	0	0	0	0	0	0	0		56	1	71	0	87	2	72	0	0	47	0	63	0	107	1	82		32	27	33	32	67	64	59	58	52	60	38	35	67	65	53	66		386	388	453	557	382	412
22	AC149828.2_FG004	0	0	0	0	0	0	0		0	0	0	0	0	0	0	0	0	0	0	0	0	0	0	0		0	0	0	0	0	0	0	0	0	0	0	0	0	0	0	0		149	74	151	135	111	74
23	AC149828.2_FG005	0	0	0	0	0	0	0		0	0	0	0	0	0	0	0	0	0	0	0	0	0	0	0		0	0	0	0	0	0	0	0	0	0	0	0	0	0	0	0		0	0	1	0	0	0
24	AC149829.2_FG002	0	0	0	0	1	1	1		9	0	7	0	17	0	18	0	0	2	0	1	0	6	1	11		5	1	1	1	5	0	4	1	8	0	7	2	5	0	7	1		57	42	34	31	36	42
25	AC149829.2_FG003	0	0	0	0	1	1	1		38	0	41	0	63	0	63	0	0	15	0	17	0	36	0	30		19	7	25	8	32	11	40	11	44	16	19	9	33	14	56	10		189	151	150	213	178	133
26	AC149829.2_FG004	0	0	0	0	1	1	1		2	0	2	0	1	0	0	0	1	4	0	3	0	4	0	7		0	4	0	0	1	2	0	2	0	3	0	0	2	6	0	4		3	8	10	10	4	8
27	AC149829.2_FG006	0	0	0	0	1	1	1		137	0	148	1	162	0	191	0	0	107	0	102	0	164	2	152		76	67	68	57	133	103	117	98	105	86	79	65	135	112	96	87		988	769	870	998	879	690
28	AC150739.3_FG001	0	0	0	0	0	0	0		11	0	13	0	18	0	20	0	0	15	0	7	0	17	1	20		3	2	4	2	13	10	10	7	9	4	6	7	11	5	15	16		93	114	65	130	85	86
29	AC152495.1_FG002	0	0	0	0	1	1	1		8	0	17	0	7	0	8	0	0	0	0	0	0	0	0	0		2	0	6	0	4	0	0	0	6	0	4	0	1	0	4	0		33	4	8	22	46	0
30	AC152495.1_FG003	0	0	0	0	0	0	0		0	0	0	0	0	0	0	0	0	0	0	0	0	0	0	0		0	0	0	0	0	0	0	0	0	0	0	0	0	0	0	0		11	11	11	10	12	6
31	AC152495.1_FG010	0	0	0	0	0	0	0		4	0	1	0	1	0	0	0	0	0	0	0	0	0	0	0		1	0	2	0	1	0	1	0	2	1	2	0	2	0	0	1		18	5	7	12	12	6
32	AC152495.1_FG011	0	0	0	0	0	0	0		1	0	0	0	0	0	0	0	0	0	0	0	0	0	0	0		0	0	0	0	0	0	0	0	0	0	0	0	0	0	0	0		3	0	1	0	5	0
33	AC152495.1_FG012	0	0	0	0	0	1	0		5	0	9	0	15	0	4	0	0	14	0	6	0	11	0	14		4	1	3	7	5	8	5	7	3	4	3	4	3	9	7	14		94	168	109	123	80	121
34	AC152495.1_FG013	0	0	0	0	0	0	0		0	0	0	0	0	0	0	0	0	0	0	0	0	0	0	0		0	0	0	0	0	0	0	0	0	0	0	0	0	0	0	0		4	0	3	2	3	1
35	AC152495.1_FG015	0	0	0	0	0	0	0		0	0	0	0	0	0	0	0	0	0	0	0	1	0	0	0		0	0	0	0	0	0	0	0	0	0	0	0	0	0	0	0		0	0	0	0	0	0
36	AC152495.1_FG017	0	0	0	0	0	0	0		3	0	6	0	2	0	0	0	0	0	0	0	0	0	0	0		1	0	1	0	1	0	0	0	1	0	0	0	1	0	1	0		41	2	12	27	44	2
37	AC155352.2_FG001	0	0	0	0	0	0	0		0	0	0	0	0	0	0	0	0	0	0	0	0	0	0	0		0	0	0	0	0	0	0	0	0	0	0	0	0	0	0	0		0	0	0	2	0	0
38	AC155352.2_FG010	0	0	0	0	0	0	0		0	0	0	0	0	0	0	0	0	0	0	0	0	0	0	0		0	0	0	0	0	0	0	0	0	0	0	0	0	0	0	0		1	4	3	4	2	1
39	AC155376.2_FG002	0	0	0	0	0	0	0		0	0	0	0	0	0	0	0	0	0	0	0	0	0	0	0		0	0	0	0	0	0	0	0	0	0	0	0	0	0	0	0		0	0	0	0	0	0
40	AC155376.2_FG004	0	0	0	0	1	1	1		37	0	70	1	65	0	76	0	0	31	0	37	0	56	0	67		25	11	25	19	47	23	56	32	42	31	35	18	53	40	42	30		232	150	194	282	254	167
41	AC155376.2_FG005	0	0	0	0	0	0	0		184	0	171	0	129	0	83	0	3	179	2	167	2	130	3	130		63	98	101	134	50	90	28	77	72	113	65	108	45	96	39	75		800	1232	1029	1053	781	1141
42	AC155377.1_FG001	0	0	0	0	1	1	1		140	0	179	0	34	0	30	0	2	138	1	150	1	35	1	38		106	67	134	84	22	8	24	11	128	99	119	70	19	17	27	22		1758	2014	2057	2521	2050	2205
43	AC155377.1_FG002	0	0	0	0	0	0	0		21	1	5	0	8	0	13	0	0	18	0	15	0	15	0	8		7	4	7	6	1	10	8	6	8	8	5	11	8	12	4	4		263	295	241	367	262	275
44	AC155390.2_FG002	0	0	0	0	0	0	0		25	0	22	0	14	0	14	0	0	15	0	5	0	13	0	8		9	4	15	10	6	10	8	7	12	9	9	7	5	8	7	6		110	62	55	79	90	45
45	AC155434.2_FG001	0	0	0	0	0	0	0		6	0	4	0	5	1	13	0	0	3	0	4	1	16	0	27		0	2	0	2	3	3	6	5	1	2	1	2	6	2	3	10		18	12	7	10	8	19
46	AC155434.2_FG003	0	0	0	0	0	0	0		0	0	0	0	0	0	0	0	0	0	0	0	0	0	0	0		0	0	0	0	0	0	0	0	0	0	0	0	0	0	0	0		0	0	0	0	0	0
47	AC155434.2_FG004	0	0	0	0	0	0	0		153	2	144	0	34	0	28	0	1	163	1	160	0	60	0	63		81	80	92	102	18	19	24	13	106	101	111	102	35	26	19	30		1010	1330	1056	1417	985	1237
48	AC155434.2_FG005	0	0	0	0	0	0	0		29	0	25	0	29	0	39	0	0	10	1	20	2	21	2	15		7	5	9	8	11	10	21	16	8	11	9	8	16	12	10	20		82	31	41	45	60	44
49	AC155434.2_FG006	0	0	0	0	1	0	0		78	0	57	0	83	0	84	0	0	69	2	58	0	128	0	111		28	26	37	33	64	40	60	53	40	46	32	21	54	32	56	54		283	305	225	268	221	274
50	AC155496.2_FG009	0	0	0	0	1	1	1		122	1	127	0	64	1	66	0	1	82	2	96	3	61	1	61		66	44	61	51	33	32	37	28	74	64	64	49	38	34	45	27		613	650	625	736	680	687
51	AC155610.2_FG007	0	0	0	0	0	0	0		0	0	0	0	0	0	0	0	0	0	0	0	0	0	0	0		0	0	0	0	0	0	0	0	0	0	0	0	0	0	0	0		904	633	749	635	720	508
52	AC155610.2_FG009	0	0	0	0	1	0	0		15	0	13	0	7	0	7	0	0	14	0	14	0	5	0	15		4	4	5	12	3	4	3	9	3	8	8	10	7	9	1	4		187	121	185	141	176	119
53	AC155622.2_FG001	0	0	0	0	1	1	1		53	0	69	0	63	0	73	0	0	12	1	15	0	20	0	16		36	6	34	10	54	11	48	13	43	10	31	9	55	11	60	15		1274	1186	1227	1157	1111	996
54	AC155622.2_FG004	0	0	0	0	1	0	0		19	0	27	0	31	0	36	0	0	19	0	21	0	30	0	28		18	8	18	9	19	21	25	16	15	15	13	7	24	20	23	18		526	447	546	545	476	397
55	AC155624.2_FG006	0	0	0	0	0	0	0		61	2	53	1	58	0	72	0	0	56	0	42	0	69	0	71		31	38	32	35	39	42	41	42	42	50	24	24	37	35	32	40		307	317	338	345	275	264
56	AC155624.2_FG011	0	0	0	0	0	0	0		1	0	0	0	1	0	0	0	0	5	0	2	0	1	0	3		2	3	1	1	1	1	0	0	2	2	2	1	0	1	0	0		121	172	169	207	110	193
57	AC159612.1_FG007	0	0	0	0	1	0	0		11	0	8	0	29	0	31	0	0	8	2	11	0	23	0	25		9	8	2	3	20	9	28	16	7	4	10	9	14	17	12	13		170	96	207	206	158	141
58	AC165171.2_FG002	0	0	0	0	0	0	0		1	0	1	0	0	0	0	0	0	0	0	1	0	1	0	0		0	0	0	0	0	0	0	0	1	0	0	1	0	0	1	0		9	18	14	10	11	15
59	AC165178.2_FG004	0	0	0	0	0	0	0		0	0	0	0	0	0	0	0	0	0	0	0	0	0	0	0		0	0	0	0	0	0	0	0	0	0	0	0	0	0	0	0		3	3	5	4	4	1
60	AC166636.1_FG007	0	0	0	0	0	0	0		0	0	1	0	0	0	1	0	0	0	0	0	2	0	0	0		2	0	0	0	0	0	0	0	0	0	0	0	0	0	0	0		2	5	10	4	3	4
61	AC166636.1_FG008	0	0	0	0	0	0	0		3	0	3	0	2	0	3	0	0	3	1	0	0	3	0	6		2	0	3	0	1	1	1	1	2	4	3	2	2	2	1	2		39	32	36	55	29	26
62	AC166636.1_FG009	0	0	0	0	0	0	0		0	0	0	0	1	0	0	0	0	0	0	0	0	0	0	0		0	0	0	0	0	0	1	0	0	0	2	0	0	0	0	0		8	3	4	4	3	7
63	AC177831.3_FG004	0	0	0	0	0	0	0		3	0	0	0	0	0	0	0	1	0	0	0	0	0	0	0		0	0	0	0	0	0	0	0	0	0	0	0	0	0	0	0		4	2	0	2	0	3
64	AC177833.2_FG001	0	0	0	0	0	0	0		0	0	0	0	0	0	0	0	0	0	0	0	0	0	0	0		0	0	0	0	0	0	0	0	0	0	0	0	0	0	0	0		2	1	0	0	0	0
65	AC177837.3_FG002	0	0	0	0	0	0	0		0	0	0	0	0	0	0	0	0	0	0	0	0	0	0	0		0	0	0	0	0	0	0	0	0	0	0	0	0	0	0	0		0	0	1	0	0	0
66	AC177838.2_FG015	0	1	0	0	0	0	0		0	0	0	0	0	0	0	0	0	0	0	0	0	0	0	0		0	0	0	0	0	0	0	0	0	0	0	0	0	0	0	0		12	1	10	11	22	0
67	AC177844.2_FG003	0	0	0	0	0	0	0		0	0	0	0	0	0	0	0	0	0	0	0	0	0	0	0		0	0	1	0	0	0	0	0	0	0	0	0	0	0	0	0		0	0	0	0	0	0
68	AC177850.2_FG003	0	0	0	0	1	1	1		0	0	1	0	2	0	0	0	1	8	1	6	0	9	0	7		0	5	1	2	1	8	0	6	2	11	2	1	1	3	0	6		10	32	22	37	7	33
69	AC177850.2_FG005	0	0	0	0	0	0	0		32	0	30	1	30	0	21	0	0	15	0	18	0	14	1	30		13	13	13	5	7	9	11	15	16	9	16	11	9	14	14	5		352	220	331	185	302	224
70	AC177860.4_FG002	0	0	0	0	0	0	0		0	0	0	0	0	0	0	0	0	0	0	0	0	0	0	0		0	0	0	0	0	0	0	0	0	0	0	0	0	0	0	0		0	1	0	1	1	0
71	AC177890.3_FG005	0	0	0	0	0	0	0		0	0	0	0	0	0	0	0	0	0	0	0	0	0	0	0		0	0	0	0	0	0	0	0	0	0	0	0	0	0	0	0		0	0	2	1	0	1
72	AC177893.3_FG003	0	0	0	0	0	0	0		0	0	0	0	0	0	0	0	0	0	0	0	0	0	0	0		0	0	0	0	0	0	0	0	0	1	0	0	0	0	0	0		0	0	0	2	0	1
73	AC177893.3_FG006	0	0	0	0	0	0	0		0	0	0	0	0	0	0	0	0	0	0	0	0	0	0	0		0	0	0	0	0	0	0	0	0	0	0	0	0	0	0	0		0	0	0	0	0	0
74	AC177897.2_FG002	0	0	0	0	1	0	0		8	0	3	0	5	0	7	0	0	4	0	3	0	8	0	5		2	1	5	0	5	1	6	2	4	2	2	0	6	3	4	4		112	102	61	110	105	91
75	AC177897.2_FG022	0	0	0	0	0	0	0		0	0	0	0	0	0	0	0	0	0	0	0	0	0	0	0		0	0	0	0	0	0	0	0	0	0	0	0	0	0	0	0		0	0	0	0	0	0
76	AC177897.2_FG029	0	0	0	0	0	0	0		0	0	0	0	0	0	0	0	0	0	0	0	0	0	0	0		0	0	0	0	0	0	0	0	0	0	0	0	0	0	0	0		0	0	0	0	0	0
77	AC177899.2_FG009	0	0	0	0	1	0	0		2	0	3	0	10	0	7	0	0	3	0	1	0	3	0	2		2	0	5	0	4	4	8	2	2	5	1	3	2	1	4	8		21	20	22	31	25	20
78	AC177899.2_FG012	0	0	0	0	0	0	0		0	0	0	0	0	0	0	0	0	0	0	0	0	0	0	0		0	0	0	0	0	0	0	0	0	0	0	0	0	0	0	0		2	0	0	0	0	0
79	AC177900.4_FG001	0	0	0	0	0	0	0		0	0	0	0	0	0	0	0	0	0	0	0	0	0	0	0		0	0	0	0	0	0	0	0	0	0	0	0	0	0	0	0		0	0	0	0	0	0
80	AC177905.2_FG001	0	0	0	0	0	0	0		0	0	0	0	0	0	0	0	0	0	0	0	0	0	0	0		0	0	0	0	0	0	0	0	0	0	0	0	0	0	0	0		0	0	0	0	0	0
81	AC177905.2_FG003	0	0	0	0	0	0	0		0	0	1	0	0	0	0	0	0	0	0	0	0	1	0	0		0	0	0	0	0	0	0	0	0	0	0	0	0	0	0	0		1	0	2	1	2	2
82	AC177908.3_FG002	0	0	0	0	0	0	0		245	0	219	0	125	0	121	0	1	217	2	192	2	105	1	126		144	128	130	137	92	82	62	84	135	135	119	113	81	80	68	81		1008	1142	1129	1296	941	1034
83	AC177908.3_FG003	0	0	0	0	0	0	0		0	0	0	0	0	0	0	0	0	0	0	0	0	0	0	0		0	0	0	0	0	0	0	0	0	0	0	0	0	0	0	0		0	1	0	0	0	1
84	AC177908.3_FG006	0	0	0	0	0	0	0		0	0	0	0	0	0	0	0	0	0	0	0	0	0	0	0		0	0	0	0	0	0	0	0	0	0	0	0	0	0	0	0		1	1	0	1	0	1
85	AC177911.4_FG005	0	0	0	0	0	0	0		0	0	0	0	0	0	0	0	0	0	0	0	0	0	0	0		0	0	0	0	0	0	0	0	0	0	0	0	0	0	0	0		1	2	0	0	0	1
86	AC177920.3_FG008	0	0	0	0	0	0	0		0	0	0	0	0	0	0	0	0	0	0	0	0	0	0	0		0	0	0	0	0	0	0	0	0	0	0	0	0	0	0	0		0	0	0	0	0	0
87	AC177922.2_FG002	0	0	0	0	0	0	0		0	0	0	0	0	0	0	0	0	0	0	0	0	0	0	0		0	0	0	0	0	0	0	0	0	0	0	0	0	0	0	0		0	0	1	0	0	0
88	AC177924.2_FG001	0	0	0	0	0	0	0		0	0	0	0	0	0	0	0	0	0	0	0	0	0	0	0		1	0	0	0	0	0	0	0	0	0	0	0	0	0	0	0		0	0	3	1	1	2
89	AC177924.2_FG003	0	0	0	0	0	0	0		0	0	0	0	0	0	0	0	0	0	0	0	0	0	0	0		0	0	0	0	0	0	0	0	0	0	0	0	0	0	0	0		0	0	1	1	0	0
90	AC177926.2_FG003	0	0	0	0	0	0	0		0	0	0	0	0	0	0	0	0	0	0	0	0	0	0	0		0	0	0	0	0	0	0	0	1	0	1	0	0	0	0	0		7	4	2	5	3	2
91	AC177930.2_FG001	0	0	0	0	0	0	0		0	0	0	0	0	0	0	0	0	0	0	0	0	0	0	0		0	0	0	0	0	0	0	0	0	0	0	0	0	0	0	0		0	1	0	0	0	0
92	AC177930.2_FG002	0	0	0	0	0	0	0		0	0	0	0	0	0	0	0	0	0	0	0	0	0	0	0		0	0	0	0	0	0	0	0	0	0	0	0	0	0	0	0		0	0	0	0	0	0
93	AC177936.6_FG008	0	0	0	0	0	1	0		13	0	17	0	4	0	7	0	0	17	1	7	0	9	0	8		5	5	11	7	5	3	6	2	13	5	14	4	5	3	8	2		219	242	217	210	229	230
94	AC177941.3_FG001	0	0	0	0	0	0	0		0	0	0	0	0	0	0	0	0	0	0	0	0	0	0	0		0	0	0	0	0	0	0	0	0	0	0	0	0	0	0	0		0	0	0	0	0	0
95	AC177941.3_FG006	0	0	0	0	0	0	0		0	0	1	0	0	0	0	0	0	0	0	0	0	0	0	0		0	0	0	0	0	0	0	0	0	0	1	0	0	0	0	1		0	2	0	1	1	0
96	AC177946.2_FG004	0	0	0	0	0	0	0		0	0	0	0	0	0	0	0	0	0	0	0	0	0	0	0		0	0	0	0	0	0	0	0	0	0	0	0	0	0	0	0		565	361	581	319	531	400
97	AC177947.2_FG003	0	0	0	0	0	0	0		0	0	0	0	0	0	0	0	0	0	0	0	0	0	0	0		0	0	0	0	0	0	0	0	0	0	0	0	0	0	0	0		1	1	2	1	1	1
98	AC182105.3_FG006	0	0	0	0	0	0	0		0	0	0	0	0	0	0	0	0	0	0	0	0	0	0	0		0	0	0	0	0	0	0	0	0	0	0	0	0	0	0	0		2	1	1	1	1	1
99	AC182413.4_FG002	0	0	0	0	0	0	0		0	0	0	0	0	0	0	0	0	0	0	0	0	0	0	0		0	0	0	0	0	0	0	0	0	0	0	0	0	0	0	0		0	3	1	1	0	2
100	AC182439.4_FG004	0	0	0	0	0	0	0		0	0	0	0	0	0	0	0	0	0	0	0	0	0	0	0		0	0	0	0	0	0	0	0	0	0	0	0	0	0	0	0		0	0	0	0	0	0
101	AC182482.3_FG003	0	0	0	0	1	1	1		7	0	10	1	16	0	19	0	1	20	0	21	1	35	1	33		5	7	7	13	7	27	12	23	7	14	6	9	9	13	9	20		40	64	43	99	36	59
102	AC182615.4_FG001	0	0	0	0	0	0	0		0	0	0	0	0	0	0	0	0	0	0	0	0	0	0	0		0	0	0	0	0	0	0	0	0	0	0	0	0	0	0	0		0	0	0	0	0	0
103	AC182617.3_FG001	0	0	0	0	0	0	0		1	0	1	0	1	0	1	0	0	1	0	0	0	1	0	0		0	1	1	0	1	0	0	0	0	0	2	0	0	0	1	0		242	195	218	221	230	208
104	AC182627.2_FG003	0	0	0	0	0	0	0		0	0	0	0	0	0	0	0	0	0	0	0	0	0	0	0		0	0	0	0	0	0	0	0	0	0	0	0	0	0	0	0		1	0	0	0	0	0
105	AC182831.3_FG004	0	0	0	0	0	0	0		0	0	0	0	0	0	0	0	0	0	0	0	0	0	0	0		0	0	0	0	0	0	0	0	0	0	0	0	0	0	0	0		1	0	0	0	1	0
106	AC182838.3_FG006	0	1	0	0	0	0	0		5	0	4	0	2	0	3	0	0	0	0	0	0	0	0	0		1	0	0	0	1	0	2	0	1	0	1	0	3	0	2	1		23	0	16	12	16	0
107	AC183315.4_FG006	0	0	0	0	1	1	1		34	0	22	0	36	0	30	0	0	5	0	4	0	5	0	6		16	1	8	4	12	6	15	4	11	2	14	2	22	6	18	5		148	74	89	113	103	72
108	AC183319.3_FG001	0	0	0	0	0	0	0		0	0	0	0	1	0	2	0	0	0	0	2	0	5	0	4		0	0	0	1	1	2	0	3	3	3	0	0	0	4	2	1		3	8	5	15	2	6
109	AC183372.4_FG006	0	0	1	0	0	0	0		0	0	0	0	0	0	0	0	0	0	0	0	0	0	0	0		0	0	0	0	0	0	0	0	0	0	0	0	0	0	0	0		0	2	3	2	0	4
110	AC183412.5_FG005	0	0	0	0	0	0	0		1	0	1	0	0	0	0	0	0	0	0	1	0	0	0	1		1	0	1	0	0	0	0	1	0	1	0	0	0	0	0	0		23	19	14	28	14	22
111	AC183413.3_FG006	0	0	0	0	0	0	0		0	0	0	0	0	0	0	0	0	1	0	1	0	0	0	1		0	0	0	0	0	0	0	0	0	1	0	0	0	1	0	1		1	15	2	8	3	8
112	AC183509.1_FG001	0	0	0	0	0	0	0		0	0	0	0	0	0	1	0	0	0	1	0	0	0	0	0		0	0	0	0	0	0	0	0	0	0	0	0	0	0	0	0		1	0	0	1	2	1
113	AC183514.3_FG006	0	0	0	0	0	0	0		0	1	0	0	0	0	1	0	0	0	0	0	0	0	0	0		0	0	0	0	0	0	0	0	0	0	0	0	0	0	0	0		5	5	4	2	3	6
114	AC183817.2_FG002	0	0	0	0	0	0	0		0	0	1	0	0	0	0	0	0	0	0	0	0	0	0	0		0	0	0	0	0	0	0	0	0	0	0	0	0	1	0	0		1	0	1	0	2	0
115	AC183888.4_FG006	0	0	0	0	0	0	0		0	0	0	0	0	0	0	0	0	0	0	0	0	0	0	0		0	0	0	0	0	0	0	0	0	0	0	0	0	0	0	0		32	39	48	42	35	36
116	AC183888.4_FG008	0	0	0	0	0	0	0		0	0	0	0	0	0	0	0	0	0	0	0	0	0	0	0		0	0	0	0	0	0	0	0	0	0	0	0	0	0	0	0		3	0	0	0	1	0
117	AC183914.3_FG004	0	0	0	0	0	0	0		0	0	0	0	0	0	0	0	0	0	0	0	0	0	0	0		0	0	0	0	0	0	0	0	0	0	0	0	0	0	0	0		0	0	0	0	0	0
118	AC183915.4_FG001	0	0	0	0	0	0	0		0	0	0	0	0	0	0	0	0	0	0	0	0	0	0	0		0	0	1	0	0	0	0	0	0	0	0	0	0	0	0	0		1	3	0	0	2	0
119	AC183927.3_FG004	0	0	0	0	0	0	0		3	0	0	0	0	0	0	0	1	0	0	0	0	0	0	0		0	0	2	0	0	0	1	0	0	0	2	0	0	0	0	0		5	2	0	0	1	1
120	AC183928.4_FG001	0	0	0	0	0	0	0		0	0	0	0	0	0	0	0	0	0	0	0	0	0	0	0		0	0	0	0	0	0	0	0	0	0	0	0	0	0	0	0		0	0	0	0	0	0
121	AC183932.3_FG007	0	0	0	0	0	0	0		36	2	23	0	35	0	33	0	1	16	1	10	1	39	1	24		16	17	19	16	23	21	28	24	16	19	10	21	22	12	21	21		98	72	100	96	59	62
122	AC183938.4_FG011	0	0	0	0	0	0	0		0	0	0	0	0	0	0	0	0	0	0	0	0	0	0	0		0	0	0	0	0	0	0	0	0	0	0	0	0	0	0	0		0	0	1	0	0	0
123	AC183944.4_FG003	0	0	0	0	0	0	0		0	0	0	0	0	0	0	0	0	0	0	0	0	0	0	0		0	0	0	0	0	0	0	0	0	0	0	0	0	0	0	0		4	2	2	3	1	3
124	AC183950.2_FG002	0	0	0	0	0	0	0		0	0	0	0	0	0	0	0	0	0	0	0	1	0	0	0		0	0	0	0	0	0	0	0	0	0	0	0	0	0	0	0		1	1	0	0	0	0
125	AC183950.2_FG003	0	0	0	0	0	0	0		0	0	0	0	0	0	0	0	0	0	0	0	0	0	0	0		0	0	0	0	0	0	0	0	0	0	0	0	0	0	0	0		0	7	0	3	2	5
126	AC183950.2_FG004	0	0	0	0	0	1	0		8	1	6	0	8	0	10	0	0	0	1	1	0	4	0	5		1	1	4	1	3	3	4	1	3	1	1	1	5	2	6	0		44	25	32	33	41	28
127	AC183950.2_FG005	0	0	0	0	1	1	1		20	0	12	0	7	0	12	0	0	1	0	0	0	0	0	0		11	1	3	1	4	0	2	1	6	1	7	3	2	1	2	0		40	24	32	26	27	20
128	AC183968.2_FG001	0	0	0	0	0	0	0		4	1	2	0	4	0	0	0	0	0	0	0	0	0	1	0		1	1	5	0	0	1	2	0	2	0	4	0	0	1	0	0		11	1	4	3	7	2
129	AC184112.4_FG010	0	0	0	0	0	0	0		0	0	0	0	0	0	0	0	0	0	0	0	0	0	0	0		0	0	0	0	1	0	0	0	0	0	0	0	0	0	0	0		3	3	2	2	2	3
130	AC184116.3_FG001	0	0	0	0	0	0	0		0	0	0	0	0	0	0	0	0	0	0	0	0	0	0	0		0	0	0	0	0	0	0	0	0	0	0	0	0	0	0	0		1	1	1	1	0	0
131	AC184127.3_FG003	0	0	0	0	0	0	0		0	0	0	0	0	0	0	0	0	0	0	0	0	0	0	0		0	0	0	0	0	0	0	0	0	0	0	0	0	0	0	0		1	1	1	0	0	0
132	AC184130.4_FG005	0	0	0	0	0	0	0		0	0	0	0	0	0	0	0	0	0	0	0	0	0	0	0		0	0	0	0	0	0	0	0	0	0	0	0	0	0	0	0		1	0	1	0	1	0
133	AC184130.4_FG012	0	0	0	0	0	0	0		3	0	3	0	1	0	1	0	0	7	0	8	0	5	0	4		1	3	5	9	2	2	0	1	2	4	3	3	1	1	1	0		24	110	74	113	47	144
134	AC184133.3_FG001	0	0	1	0	0	0	0		0	0	0	0	0	0	0	0	0	0	0	0	0	0	0	0		0	0	0	0	0	0	0	0	0	0	0	0	0	0	0	0		0	14	7	6	1	13
135	AC184164.2_FG004	0	0	0	0	0	0	0		0	0	0	0	0	0	0	0	0	0	0	0	0	0	0	0		0	0	0	0	0	0	0	0	0	0	0	0	0	0	0	0		0	0	0	0	0	0
136	AC184164.2_FG006	0	0	0	0	0	0	0		0	0	0	0	0	0	0	0	1	0	0	0	0	0	0	0		0	0	0	0	0	0	0	0	0	0	0	0	0	0	0	0		0	1	0	0	0	0
137	AC184169.3_FG001	0	0	0	0	0	0	0		6	0	10	0	0	0	0	0	0	7	0	6	0	0	0	0		4	2	3	1	0	0	0	0	3	1	7	3	1	0	0	0		72	49	63	50	74	50
138	AC184170.4_FG002	0	0	0	0	1	0	0		1	0	0	0	0	0	0	0	0	3	0	0	0	1	0	0		0	5	0	2	1	1	0	2	1	2	0	0	0	1	0	0		3	9	8	4	0	4
139	AC184171.4_FG002	0	0	0	0	0	0	0		0	0	0	0	0	0	0	0	0	0	0	0	0	0	0	0		0	0	0	0	0	0	0	0	0	0	0	0	0	0	0	0		0	0	1	0	0	1
140	AC184172.3_FG001	0	0	0	0	0	0	0		0	0	0	0	0	0	0	0	0	0	0	0	0	0	0	0		0	0	0	0	0	0	0	0	0	0	0	0	0	0	0	0		0	0	0	0	0	0
141	AC184699.3_FG005	0	0	0	0	0	0	0		0	0	0	0	0	0	0	0	0	0	0	0	0	0	0	0		0	0	0	0	0	0	0	0	0	0	0	0	0	0	0	0		1	2	1	0	1	0
142	AC184764.3_FG003	0	0	0	0	0	0	0		0	0	0	0	0	0	0	0	0	0	0	0	0	0	0	0		0	0	0	0	0	0	0	0	0	0	0	0	0	0	0	0		2	3	1	1	1	1
143	AC184764.3_FG006	0	0	0	0	0	0	0		0	0	0	0	0	0	0	0	0	0	0	0	0	0	0	0		0	0	0	0	0	0	0	0	0	0	1	0	0	0	0	0		3	2	1	2	1	2
144	AC184765.4_FG005	0	0	0	0	0	0	0		0	0	0	0	0	0	0	0	0	0	0	0	0	0	0	0		0	0	0	0	0	0	0	0	0	0	0	0	0	0	0	0		1	0	0	1	0	1
145	AC184771.4_FG003	0	0	0	0	0	0	0		0	0	0	0	0	0	0	0	0	0	0	0	0	0	0	0		0	0	0	0	0	0	0	0	0	0	0	0	1	0	0	0		0	0	0	0	0	0
146	AC184775.2_FG002	0	0	0	0	0	0	0		0	0	0	0	0	0	0	0	0	0	0	0	0	0	0	0		0	0	0	0	0	0	0	0	0	0	0	0	0	0	0	0		1	0	0	0	0	0
147	AC184788.2_FG001	0	0	0	0	0	0	0		0	0	0	0	0	0	0	0	0	0	0	0	0	0	0	0		0	0	0	0	0	0	0	0	0	0	0	0	0	0	0	0		0	0	0	0	0	0
148	AC184789.4_FG002	0	0	0	0	0	0	0		0	0	0	0	0	0	0	0	0	0	0	0	0	0	0	0		0	0	0	0	0	0	0	0	0	0	0	0	0	0	0	0		0	4	2	0	1	3
149	AC184794.2_FG003	0	0	0	0	0	0	0		0	0	0	0	0	0	0	0	0	0	0	0	0	0	0	0		1	0	0	0	0	0	0	0	0	0	0	0	0	0	0	0		0	1	4	3	0	1
150	AC184831.3_FG003	0	0	0	0	0	0	0		0	0	0	0	0	0	0	0	0	0	0	0	0	0	0	0		0	0	0	0	0	0	0	0	0	0	0	0	0	0	0	0		6	1	1	3	2	0
151	AC184831.3_FG005	0	0	0	0	0	0	0		0	0	0	0	0	0	0	0	0	0	0	0	0	0	0	0		0	0	0	0	0	0	0	0	0	0	0	0	0	0	0	0		0	0	0	0	0	0
152	AC184831.3_FG008	0	0	0	0	0	0	0		0	0	0	0	0	0	0	0	0	0	0	0	0	0	0	0		0	0	0	0	0	0	0	0	0	0	0	0	0	0	0	0		0	0	0	0	0	0
153	AC184836.3_FG002	0	0	0	0	0	0	0		0	0	0	0	0	0	0	0	0	0	0	0	0	0	0	0		0	0	0	0	0	0	0	0	0	0	0	0	0	0	0	0		0	0	0	0	0	0
154	AC184857.2_FG006	0	0	0	0	0	0	0		0	0	0	0	0	0	0	0	0	0	0	0	0	0	0	0		0	0	0	0	0	0	0	0	0	0	0	0	0	0	0	0		1	0	2	0	0	0
155	AC184871.2_FG009	0	0	0	0	0	0	0		0	0	0	0	0	0	0	0	0	0	0	0	0	0	0	0		0	0	0	0	0	0	0	0	0	0	0	0	0	0	0	0		0	0	0	0	0	1
156	AC185108.3_FG006	0	0	0	0	0	0	0		0	0	0	0	0	0	0	0	0	0	0	0	0	0	0	0		0	0	0	0	0	0	0	0	0	0	0	0	0	0	0	0		1	0	0	0	0	0
157	AC185108.3_FG010	0	0	0	0	0	0	0		0	0	0	0	0	0	0	0	0	0	0	0	0	1	1	1		0	0	0	0	0	0	0	0	0	0	0	0	0	0	0	0		1	0	1	2	1	0
158	AC185108.3_FG011	0	0	0	0	0	0	0		0	0	0	0	0	0	1	0	0	0	0	0	0	0	0	0		0	0	0	0	1	0	0	0	0	0	1	0	0	0	1	0		1	1	0	0	0	1
159	AC185122.3_FG009	0	0	0	0	0	0	0		0	0	0	0	0	0	0	0	0	0	0	0	0	0	0	0		0	0	0	0	0	0	0	0	0	0	0	0	0	0	0	0		2	0	1	0	1	0
160	AC185126.3_FG006	0	0	0	0	0	0	0		0	0	0	0	0	0	0	0	0	0	0	0	0	0	0	0		0	0	0	0	0	0	0	0	0	0	0	0	0	0	0	0		1	2	0	1	1	1
161	AC185130.2_FG004	0	0	0	0	0	0	0		0	0	0	0	0	0	0	0	0	0	0	0	0	0	0	0		0	0	0	0	0	0	0	0	0	0	0	0	0	0	0	0		4	3	1	2	1	2
162	AC185130.2_FG005	0	0	0	0	0	0	0		0	0	0	0	0	0	0	0	0	0	0	0	0	0	0	0		0	0	0	0	0	0	0	0	0	0	0	0	0	0	0	0		0	1	1	2	0	2
163	AC185217.3_FG004	0	0	0	0	0	0	0		0	0	0	0	0	0	0	0	0	0	0	0	0	0	0	0		0	0	0	0	1	0	0	0	0	0	0	0	0	0	0	0		1	0	0	1	0	0
164	AC185217.3_FG007	0	0	0	0	0	0	0		0	0	0	0	0	0	0	0	0	0	0	0	0	0	0	0		1	0	0	0	0	0	0	0	0	0	0	0	0	0	0	0		0	0	1	0	0	0
165	AC185226.4_FG001	0	0	0	0	0	0	0		0	0	0	0	0	0	0	0	0	0	0	0	0	0	0	0		0	0	0	0	0	0	0	0	0	0	0	0	0	0	0	0		579	798	604	869	666	709
166	AC185252.4_FG002	0	0	0	0	0	0	0		0	0	0	0	0	0	0	0	0	0	0	0	0	0	0	0		0	0	0	0	0	0	0	0	0	0	0	0	0	0	0	0		0	0	0	0	0	0
167	AC185254.4_FG002	0	0	0	0	0	0	0		0	0	0	0	0	0	0	0	0	0	0	0	0	0	0	0		0	0	0	0	0	0	0	0	0	0	0	0	0	0	0	0		3	3	5	5	5	7
168	AC185256.3_FG002	0	0	0	0	0	0	0		0	0	0	0	0	0	0	0	0	0	0	0	0	0	0	0		0	0	0	0	0	0	0	0	0	0	0	0	0	0	0	0		0	3	1	0	1	0
169	AC185256.3_FG003	0	0	0	0	0	0	0		0	0	0	0	0	0	0	0	0	0	0	0	0	0	0	0		0	0	0	0	0	0	0	0	0	0	0	0	0	0	0	0		4	5	1	3	2	2
170	AC185261.4_FG002	0	0	0	0	0	0	0		0	0	0	0	0	0	0	0	0	0	0	0	0	0	0	0		0	0	0	0	0	0	0	0	0	0	0	0	0	0	0	0		0	0	0	1	0	0
171	AC185265.3_FG003	0	0	0	0	0	0	0		0	0	0	0	0	0	0	0	0	0	0	0	0	0	0	0		0	0	0	0	0	0	0	0	0	0	0	0	0	0	0	0		0	0	0	0	0	0
172	AC185276.2_FG004	0	0	0	0	0	0	0		0	0	0	0	0	0	0	0	0	0	0	0	0	0	0	0		0	0	0	0	0	0	0	0	0	0	0	0	0	0	0	0		0	0	0	0	0	0
173	AC185276.2_FG006	0	0	0	0	0	0	0		0	0	0	0	0	0	0	0	0	0	0	0	0	0	0	0		0	0	0	0	0	0	0	0	0	0	0	0	0	0	0	0		0	0	0	0	0	0
174	AC185281.5_FG006	0	0	0	0	0	0	0		0	0	0	0	0	0	0	0	0	0	1	0	0	0	1	0		1	0	0	0	0	0	0	0	0	0	0	0	0	0	0	0		3	6	6	2	3	3
175	AC185300.4_FG002	0	0	0	0	1	1	1		23	0	12	0	36	0	38	0	0	7	0	12	0	29	0	14		15	2	8	2	22	5	19	14	9	6	12	3	18	4	18	10		235	104	177	151	202	90
176	AC185305.3_FG003	0	0	0	0	0	0	0		0	0	0	0	0	0	0	0	0	0	0	0	0	0	0	0		0	0	0	0	0	0	0	0	0	0	0	0	0	0	0	0		0	1	0	0	0	0
177	AC185415.3_FG005	0	0	0	0	0	0	0		0	0	0	0	0	0	0	0	0	0	0	0	0	0	0	0		0	0	0	0	0	0	0	0	0	0	0	0	0	0	0	0		170	202	174	163	181	176
178	AC185422.3_FG005	0	0	0	0	0	0	0		1	0	2	0	1	0	2	0	1	0	0	0	0	1	0	1		0	1	0	0	0	0	0	0	2	0	0	0	1	0	2	0		2	2	2	5	4	0
179	AC185427.5_FG004	0	0	0	0	0	0	0		1	0	0	0	0	0	0	0	0	0	0	0	0	0	0	0		0	0	0	0	0	0	0	0	0	0	0	0	0	0	1	0		1	1	1	0	0	1
180	AC185443.3_FG004	0	0	0	0	0	0	0		0	0	0	0	0	0	0	0	0	0	0	0	0	0	0	0		0	0	0	0	0	0	0	0	0	0	0	0	0	0	0	0		0	0	0	0	0	0
181	AC185460.3_FG004	0	0	0	0	0	0	0		0	0	0	0	0	0	0	0	0	0	0	0	0	0	0	0		0	0	0	0	0	0	0	0	0	0	0	0	0	0	0	0		6	4	5	9	6	3
182	AC185466.3_FG001	0	0	0	0	0	0	0		1	0	1	0	0	0	0	1	0	0	0	0	0	0	0	0		0	2	0	0	0	0	0	0	0	0	0	0	0	0	0	0		27	41	26	46	53	39
183	AC185471.3_FG005	0	0	0	0	0	0	0		3	0	4	0	1	0	6	0	0	1	0	2	0	1	0	0		0	1	1	2	0	1	1	1	1	1	1	1	1	0	2	1		16	2	12	16	20	9
184	AC185473.3_FG005	0	0	0	0	0	0	0		0	0	0	0	0	0	0	0	0	0	0	0	0	0	0	0		0	0	0	0	0	0	0	0	0	0	0	0	0	0	0	0		0	0	0	0	0	0
185	AC185475.3_FG001	0	0	0	0	0	0	0		1	0	0	0	0	0	0	0	0	0	0	0	1	0	0	0		0	0	2	0	0	0	0	0	0	0	0	0	1	0	0	0		2	4	4	1	0	2
186	AC185478.4_FG005	0	0	0	0	0	0	0		0	0	0	0	0	0	1	0	0	0	0	0	0	1	0	1		0	1	0	1	0	0	0	0	1	0	0	0	0	1	0	0		12	8	7	12	10	8
187	AC185478.4_FG007	0	0	0	0	0	0	0		0	0	0	0	0	0	0	0	0	0	0	0	0	0	0	0		0	0	0	0	0	0	0	0	0	0	0	0	0	0	0	0		0	0	0	0	0	0
188	AC185487.4_FG001	0	0	0	0	0	0	0		0	0	0	0	0	0	0	0	0	0	0	0	0	0	0	0		0	0	0	0	0	0	0	0	0	0	0	0	0	0	0	0		0	0	0	0	1	0
189	AC185500.3_FG001	0	0	0	0	0	0	0		1	0	0	0	0	0	0	0	0	0	0	0	0	0	0	0		0	0	0	0	0	0	0	0	0	1	0	0	0	0	0	0		1	1	1	1	1	2
190	AC185501.3_FG001	0	0	0	0	0	0	0		0	0	0	0	0	0	0	0	0	0	0	0	0	0	0	0		0	0	0	0	0	0	0	0	0	0	0	0	0	0	1	0		0	0	0	1	1	0
191	AC185501.3_FG006	0	0	0	0	0	0	0		0	0	0	0	0	0	0	0	0	0	0	0	0	0	0	0		0	0	0	0	0	0	0	0	0	0	0	0	0	0	0	0		1	1	0	0	0	0
192	AC185504.4_FG002	0	0	0	0	0	0	0		0	0	0	0	0	0	0	0	0	0	0	0	0	0	0	0		0	0	0	0	0	0	0	0	0	0	0	0	0	0	0	0		1	0	0	0	0	0
193	AC185522.2_FG002	0	0	0	0	0	0	0		0	0	0	0	0	0	0	0	0	0	0	0	0	0	0	0		0	0	0	0	0	0	0	0	0	0	0	0	0	0	0	0		1	1	1	1	0	0
194	AC185530.2_FG004	0	0	0	0	0	0	0		0	0	0	0	0	0	0	0	0	0	0	0	0	0	0	0		0	0	0	0	0	0	1	0	0	0	0	0	0	0	0	0		3	6	3	3	3	6
195	AC185586.4_FG003	0	0	0	0	0	0	0		0	0	0	0	0	0	0	0	0	0	0	0	0	0	0	0		0	0	0	0	0	0	0	0	0	0	0	0	0	0	0	0		1	1	0	1	1	0
196	AC185587.3_FG003	0	0	0	0	0	0	0		0	0	0	0	0	0	0	0	0	0	0	0	0	0	0	0		0	0	0	0	0	0	0	0	0	0	0	0	0	0	0	0		4	2	3	1	0	2
197	AC185588.2_FG002	0	0	0	0	0	0	0		0	1	1	0	0	0	0	0	0	0	0	2	0	0	0	0		0	0	1	0	0	0	0	0	0	0	0	0	0	0	0	0		17	3	5	10	12	13
198	AC185593.3_FG003	0	0	0	0	0	0	0		0	0	0	0	0	0	0	0	0	0	0	0	0	0	0	0		0	0	0	1	0	0	0	0	0	0	0	0	0	0	0	0		2	1	1	0	0	0
199	AC185605.3_FG003	0	0	0	0	0	0	0		0	0	0	0	0	0	0	0	0	0	0	0	0	0	0	0		0	0	0	0	0	0	0	0	0	0	0	0	0	0	0	0		1	0	1	0	1	0
200	AC185610.3_FG001	0	0	0	0	0	0	0		0	0	0	0	0	0	0	0	0	0	0	0	0	0	0	0		0	0	0	0	0	0	0	0	0	0	0	0	0	0	0	0		1	0	0	0	0	0
201	AC185611.3_FG001	0	0	0	0	1	1	1		7	0	6	0	7	1	9	0	1	2	0	2	0	0	0	2		7	0	4	1	2	0	3	1	3	0	6	2	3	0	4	0		9	5	10	5	8	6
202	AC185623.4_FG010	0	0	0	0	0	0	0		0	0	0	0	0	0	0	0	0	0	0	0	0	0	0	0		0	0	0	0	0	0	0	0	0	0	0	0	0	0	0	0		3	1	2	1	5	4
203	AC185623.4_FG012	0	0	0	0	0	0	0		1	0	0	0	0	0	0	0	0	0	0	0	0	0	0	0		0	0	0	0	0	0	0	0	0	0	0	0	0	0	0	0		1	1	0	0	0	0
204	AC185628.3_FG010	0	0	0	0	0	0	0		0	0	0	0	0	0	0	0	0	0	0	0	0	0	0	0		0	0	0	0	0	0	0	0	0	0	0	0	1	0	0	0		1	1	0	0	0	0
205	AC185642.4_FG001	0	0	0	0	0	0	0		0	0	0	0	0	0	0	0	0	0	0	0	0	0	0	0		0	0	0	0	0	0	0	0	0	0	0	0	0	0	0	0		0	0	0	0	0	0
206	AC185648.3_FG007	0	0	0	0	0	0	0		0	0	0	0	0	0	0	0	0	0	0	0	0	0	0	0		0	0	0	0	0	0	0	0	0	0	0	0	0	0	0	0		0	0	0	0	0	0
207	AC185649.2_FG003	0	0	0	0	0	0	0		0	0	0	0	0	0	0	0	0	0	0	0	0	0	0	0		0	0	0	0	0	0	0	0	0	0	0	0	0	0	0	0		0	0	0	0	0	0
208	AC185655.3_FG004	0	0	0	0	0	0	0		0	0	0	0	0	0	0	0	0	0	0	0	0	0	0	0		0	0	0	0	0	0	0	0	0	0	0	0	0	0	0	0		0	0	0	0	0	0
209	AC185655.3_FG005	0	0	0	0	0	0	0		1	0	0	0	0	0	3	0	0	0	0	0	0	0	1	0		1	0	0	0	0	0	0	0	0	0	0	0	0	0	0	0		4	1	2	1	1	0
210	AC185656.3_FG002	0	0	0	0	0	0	0		0	0	0	0	0	0	0	0	0	0	0	0	0	0	0	0		0	0	0	0	0	0	0	0	0	0	0	0	0	0	0	0		1	0	0	0	0	0
211	AC185660.3_FG003	0	0	0	0	0	0	0		0	0	0	0	0	0	0	0	0	0	0	0	0	0	0	0		0	0	0	0	0	0	0	0	0	0	0	0	0	0	0	0		0	0	0	0	0	0
212	AC186009.3_FG001	0	0	0	0	0	0	0		0	0	0	0	0	0	0	0	0	0	0	0	0	0	0	0		0	0	0	0	0	0	0	0	0	0	0	0	0	0	0	0		0	0	0	0	0	0
213	AC186013.3_FG001	0	0	1	0	0	0	0		0	0	0	0	0	0	0	0	0	0	0	0	0	0	0	0		0	0	0	0	0	0	0	0	0	0	0	0	0	0	0	0		0	2	2	2	0	1
214	AC186145.3_FG002	0	0	0	0	0	0	0		0	0	0	0	0	0	0	0	0	0	0	0	0	0	0	0		0	0	0	0	0	0	0	0	0	0	0	0	0	0	0	0		22	6	12	11	12	7
215	AC186147.3_FG008	0	0	0	0	0	0	0		0	0	0	0	0	0	0	0	0	0	0	0	0	0	0	0		0	0	0	0	0	0	0	0	0	0	0	0	0	0	0	0		3	7	5	4	1	4
216	AC186156.3_FG004	0	0	0	0	0	0	0		0	0	0	0	0	0	0	0	0	0	0	0	0	0	0	0		0	0	0	0	0	0	0	0	0	0	0	0	0	0	0	0		0	0	0	0	0	0
217	AC186156.3_FG005	0	0	0	0	0	0	0		0	0	0	0	0	0	0	0	0	0	0	0	0	0	0	0		0	0	0	0	0	0	0	0	0	0	0	0	0	0	0	0		0	0	0	0	0	0
218	AC186164.3_FG001	0	0	0	0	0	0	0		0	0	0	0	0	0	0	0	0	0	0	0	0	0	0	0		0	0	0	0	0	0	0	0	0	0	0	0	0	0	0	0		14	0	3	5	10	3
219	AC186166.3_FG008	0	0	0	1	1	1	1		27	0	37	0	26	0	44	0	0	33	0	34	0	31	0	37		11	11	21	9	31	11	32	12	36	14	22	21	42	18	44	20		232	189	198	253	239	148
220	AC186189.3_FG004	0	0	0	0	0	0	0		0	0	0	0	0	0	0	0	0	0	0	0	0	0	0	0		0	0	0	0	0	0	0	0	0	0	0	0	0	0	0	0		0	0	2	0	0	2
221	AC186189.3_FG005	0	0	0	0	0	0	0		0	0	0	0	0	0	0	0	0	0	0	0	0	0	0	0		0	0	0	0	0	0	0	0	0	0	0	0	0	0	0	0		0	0	3	1	0	0
222	AC186195.4_FG001	0	0	0	0	0	0	0		0	0	0	0	0	0	0	0	0	0	0	0	0	0	0	0		0	0	0	0	0	0	0	0	0	0	0	0	0	0	0	0		0	0	0	0	0	1
223	AC186231.4_FG002	0	0	0	0	1	1	1		26	2	15	0	7	0	7	0	0	0	0	2	0	0	1	4		9	0	36	5	14	0	4	1	2	0	23	2	6	1	11	1		99	8	39	17	81	5
224	AC186233.3_FG007	0	0	0	0	0	0	0		0	0	0	0	0	0	0	0	0	0	0	0	0	0	0	0		0	0	0	0	0	0	0	0	0	0	0	0	0	0	0	0		0	3	0	1	2	0
225	AC186283.4_FG002	0	0	0	0	0	0	0		0	0	0	0	0	0	0	0	0	0	0	0	0	0	0	0		0	0	0	0	0	0	0	0	0	0	0	0	0	0	0	0		0	0	0	0	0	0
226	AC186284.3_FG007	0	0	0	0	0	0	0		0	0	0	0	0	0	0	0	0	0	0	0	0	0	0	0		0	0	0	0	0	0	0	0	0	0	0	0	0	0	0	0		1	2	2	0	1	1
227	AC186287.7_FG005	0	0	0	0	0	0	0		0	0	0	0	0	0	0	0	0	0	0	0	0	0	1	0		0	0	1	0	0	0	0	0	0	0	1	0	0	0	0	0		1	1	2	2	2	1
228	AC186309.3_FG002	0	0	0	0	0	0	0		0	0	0	0	0	0	0	0	0	0	0	0	0	0	0	0		0	0	0	0	0	0	0	0	0	0	0	0	0	0	0	0		0	0	0	0	0	0
229	AC186309.3_FG006	0	0	0	0	0	0	0		0	0	0	0	0	0	0	0	0	0	0	0	0	0	0	0		0	0	0	0	0	0	0	0	0	0	0	0	0	0	0	0		1	0	0	0	0	0
230	AC186310.4_FG004	0	0	0	0	0	0	0		0	0	0	0	0	0	0	0	0	0	0	0	0	0	0	0		0	0	0	0	0	0	0	0	0	0	0	0	0	0	0	0		0	0	0	2	0	0
231	AC186322.4_FG003	0	0	0	0	0	0	0		0	0	0	0	0	0	0	0	0	0	0	0	0	0	0	0		0	0	0	0	0	0	0	0	0	0	0	0	0	0	0	0		0	2	0	1	0	0
232	AC186322.4_FG005	0	0	0	0	0	0	0		0	0	0	0	0	0	0	0	0	0	0	0	0	1	0	0		0	0	0	0	0	0	0	0	0	0	0	0	0	0	0	0		4	4	9	3	2	8
233	AC186329.3_FG006	0	0	0	0	0	0	0		0	0	0	0	0	0	0	0	0	0	0	0	0	0	0	0		0	0	0	0	0	0	0	0	0	0	0	0	0	0	0	0		0	0	0	0	0	0
234	AC186337.3_FG003	0	0	0	0	0	0	0		0	0	0	0	0	0	0	0	0	0	0	0	0	0	0	0		0	0	0	0	0	0	0	0	0	0	0	0	0	0	0	0		0	1	0	0	0	0
235	AC186375.3_FG001	0	0	0	0	0	0	0		2	1	0	0	1	0	0	0	0	0	0	0	0	0	1	0		1	0	0	0	1	0	0	0	0	0	0	0	0	0	0	0		3	0	1	0	0	0
236	AC186404.3_FG002	0	0	0	0	0	0	0		0	0	0	0	0	0	0	0	0	0	0	0	0	0	0	0		0	0	0	0	0	0	0	0	0	0	0	0	0	0	0	0		1	1	1	0	0	1
237	AC186406.4_FG006	0	0	0	0	0	0	0		0	0	0	0	0	0	0	0	0	0	0	0	0	0	0	0		0	0	0	0	0	0	0	0	0	0	0	0	0	0	0	0		2	4	5	3	2	2
238	AC186408.5_FG005	0	0	0	0	0	0	0		0	0	0	0	0	0	0	0	0	0	0	0	0	0	0	0		0	0	0	0	0	0	0	0	0	0	0	0	0	0	0	0		0	0	1	0	0	0
239	AC186412.4_FG011	0	0	0	0	0	0	0		0	0	0	0	0	0	0	0	0	0	0	0	0	0	0	0		0	0	0	0	0	0	0	0	0	0	0	0	0	0	0	0		1	0	0	0	0	0
240	AC186417.3_FG004	0	0	0	0	0	0	0		0	0	0	0	1	0	0	0	1	0	0	0	0	0	0	0		0	0	0	0	0	0	0	0	0	0	0	0	0	0	0	0		4	6	4	4	1	9
241	AC186417.3_FG006	0	0	0	0	0	0	0		0	0	0	0	0	0	0	0	0	0	0	0	0	0	0	0		0	0	0	0	0	0	0	0	0	0	0	0	0	0	0	0		0	0	0	0	0	0
242	AC186424.4_FG009	0	0	0	0	0	0	0		0	0	0	0	0	0	0	0	0	0	0	0	0	0	0	0		0	0	0	0	0	0	0	0	0	0	0	0	0	0	0	0		0	0	1	2	1	0
243	AC186431.5_FG001	0	0	0	0	0	0	0		0	0	1	0	1	0	0	0	0	0	0	0	0	0	0	0		0	0	0	0	0	0	0	0	0	0	0	0	1	0	0	0		5	2	3	3	2	3
244	AC186433.4_FG001	0	0	0	0	0	0	0		0	0	0	0	0	0	0	0	0	0	0	0	0	0	0	0		0	0	0	0	0	0	0	0	0	0	0	0	0	0	0	0		1	0	0	0	0	1
245	AC186493.4_FG002	0	0	0	0	0	0	0		0	0	0	0	0	0	0	0	0	0	0	0	0	0	0	0		0	0	0	0	0	0	0	0	1	0	1	0	0	0	0	0		0	0	1	1	0	0
246	AC186500.3_FG001	0	0	0	0	0	0	0		0	0	0	0	0	0	0	0	0	0	0	0	0	0	0	0		0	0	0	0	0	0	0	0	0	0	0	0	0	0	0	0		0	0	0	0	0	0
247	AC186506.3_FG001	0	0	0	0	0	0	0		0	0	0	0	1	0	0	0	0	0	0	0	0	0	0	0		0	0	0	0	0	0	0	0	0	0	0	0	0	0	0	0		0	0	0	1	0	0
248	AC186512.3_FG007	0	0	0	0	0	0	0		0	0	0	0	0	0	0	0	0	0	0	0	0	0	0	0		0	0	0	0	0	0	0	0	0	0	0	0	0	0	0	0		92	86	71	56	64	84
249	AC186519.4_FG002	0	0	0	0	0	0	0		0	0	0	0	0	0	0	0	0	0	0	0	0	0	0	0		0	0	0	0	0	0	0	0	0	0	0	0	0	0	0	0		0	1	1	0	1	0
250	AC186524.3_FG005	0	0	0	0	0	0	0		0	0	0	0	0	0	0	0	0	0	0	0	0	0	0	0		0	0	0	0	0	0	0	0	0	0	0	0	0	0	0	0		1	3	0	1	2	1
251	AC186524.3_FG006	0	0	0	0	0	0	0		0	0	0	0	0	0	0	0	0	0	0	0	0	0	0	0		0	0	0	0	0	0	0	0	0	0	0	0	0	0	0	0		3	1	0	0	1	1
252	AC186563.4_FG004	0	0	0	0	0	0	0		0	0	0	0	0	0	0	0	0	0	0	0	0	0	0	0		0	0	0	0	0	0	0	0	0	0	0	0	0	0	0	0		0	0	0	0	0	0
253	AC186577.3_FG006	0	0	0	0	0	0	0		4	1	3	0	4	0	1	0	0	0	0	1	1	0	0	0		1	0	3	0	1	1	1	0	1	0	2	0	1	0	1	0		9	3	2	2	8	5
254	AC186579.3_FG007	0	0	0	0	0	0	0		0	0	0	0	0	0	0	0	0	0	0	0	0	0	0	0		0	0	0	0	0	0	0	0	0	0	0	0	0	0	0	0		0	1	1	2	0	1
255	AC186581.3_FG003	0	0	1	0	0	0	0		0	0	0	0	0	0	0	0	0	2	0	0	1	0	0	0		0	0	0	1	0	0	0	0	0	1	0	1	0	0	0	5		0	5	1	2	0	3
256	AC186583.3_FG004	0	0	0	0	0	0	0		0	0	0	0	0	0	0	0	0	0	0	0	0	0	0	0		0	0	0	0	0	0	0	0	0	0	0	0	0	0	0	0		1	2	0	0	0	0
257	AC186585.4_FG002	0	0	0	0	0	0	0		1	0	1	0	0	0	0	0	0	0	0	0	0	0	0	0		0	0	0	0	0	0	0	1	0	0	0	0	0	0	0	0		1	0	0	0	1	0
258	AC186590.3_FG005	0	0	0	0	0	0	0		0	0	0	0	0	0	0	0	0	0	0	0	0	0	0	0		0	0	0	0	0	0	0	0	0	0	0	0	0	0	0	0		0	0	0	0	0	0
259	AC186590.3_FG006	0	0	0	0	0	0	0		0	0	0	0	0	0	0	0	0	0	0	0	0	0	0	0		0	0	0	0	0	0	0	0	0	0	0	0	0	0	0	0		0	0	0	0	0	0
260	AC186592.3_FG002	0	0	0	0	0	0	0		0	0	0	0	0	0	0	0	0	0	0	0	0	0	0	0		0	0	0	0	0	0	0	0	0	0	0	0	0	0	0	0		0	0	0	0	0	0
261	AC186592.3_FG003	0	0	0	0	0	0	0		0	0	0	0	0	0	0	0	0	0	0	0	0	0	0	0		0	0	0	0	0	0	0	0	0	0	0	0	0	0	0	0		1	1	0	0	1	1
262	AC186602.4_FG003	0	0	0	0	0	0	0		0	0	0	0	0	0	0	0	0	0	0	0	0	0	0	0		0	0	0	0	0	0	0	0	0	0	0	0	0	0	0	0		1	3	3	0	0	2
263	AC186603.6_FG003	0	0	0	0	0	0	0		0	0	0	0	0	0	0	0	0	0	0	0	0	0	0	0		0	0	0	0	0	0	0	0	0	0	0	0	0	0	0	0		3	2	5	4	4	5
264	AC186606.4_FG003	0	0	0	0	0	0	0		0	0	2	0	4	0	2	0	1	1	0	1	0	4	0	3		1	1	2	1	3	1	1	0	4	0	1	0	1	2	1	1		3	5	3	6	7	3
265	AC186611.4_FG005	0	0	0	0	0	0	0		0	0	0	0	0	0	0	0	0	0	1	0	0	0	1	0		0	0	0	0	0	0	0	0	0	0	0	0	0	0	0	0		0	1	0	1	0	2
266	AC186613.4_FG003	0	0	0	0	0	0	0		0	0	0	0	0	0	0	0	0	0	0	0	0	0	0	0		0	0	0	0	0	0	0	0	0	0	0	0	0	0	0	0		0	0	0	0	1	0
267	AC186619.3_FG001	0	0	0	0	0	0	0		0	0	0	0	0	0	0	0	0	0	0	0	0	0	0	0		0	0	0	0	0	0	0	0	0	0	0	0	0	0	0	0		1	2	1	0	1	1
268	AC186647.3_FG001	0	0	0	0	0	0	0		0	0	0	0	0	0	0	0	0	0	0	0	0	0	0	0		0	0	0	0	0	0	0	0	0	0	0	0	0	0	0	0		0	0	0	0	0	1
269	AC186653.4_FG005	0	0	0	0	0	0	0		0	0	0	0	0	0	0	0	0	0	0	0	0	0	0	0		0	0	0	0	0	0	0	0	0	0	0	0	0	0	0	0		0	0	0	0	0	0
270	AC186656.4_FG004	0	0	0	0	0	0	0		0	0	0	0	0	0	0	0	0	0	0	0	0	0	0	0		0	0	0	0	0	0	0	0	0	0	0	0	0	0	0	0		0	0	0	0	0	0
271	AC186656.4_FG012	0	0	0	0	0	0	0		1	0	0	0	0	0	0	0	0	0	1	0	0	1	0	1		0	1	0	0	0	0	0	0	0	0	0	0	1	0	0	0		1	3	2	2	0	2
272	AC186663.3_FG006	0	0	0	0	0	0	0		0	0	0	0	0	0	0	0	0	0	0	0	0	0	0	0		0	0	0	0	0	0	0	0	0	0	0	0	0	0	0	0		0	0	0	0	0	0
273	AC186667.3_FG007	0	0	0	0	0	0	0		0	0	0	0	0	0	0	0	0	0	0	0	0	0	0	0		0	0	0	0	0	0	0	0	0	0	0	0	0	0	0	0		2	4	5	4	3	2
274	AC186669.3_FG002	0	0	0	0	0	0	0		0	0	0	0	0	0	0	0	0	0	0	0	0	0	0	0		0	0	1	0	0	0	0	0	0	1	0	0	0	0	0	0		0	1	2	1	0	2
275	AC186684.4_FG001	0	0	0	0	0	0	0		0	0	0	0	0	0	0	0	0	0	0	0	0	0	0	0		0	0	0	0	0	0	0	0	0	0	0	0	0	0	0	0		1	1	2	2	2	2
276	AC186691.4_FG006	0	0	0	0	0	0	0		0	0	0	0	0	0	0	0	0	0	0	0	0	0	0	0		0	0	0	0	0	0	0	0	0	0	0	0	0	0	0	0		0	0	0	0	0	0
277	AC186743.4_FG003	0	0	0	0	0	0	0		0	0	0	0	0	0	0	0	0	0	0	0	0	1	0	0		0	0	0	0	0	1	0	0	0	0	0	0	0	0	0	0		2	2	2	0	0	1
278	AC186781.4_FG006	0	0	0	0	0	0	0		0	0	0	0	0	0	0	0	0	0	0	0	0	0	0	0		0	0	0	0	0	0	0	0	0	0	0	0	0	0	0	0		1	4	5	1	2	2
279	AC186782.4_FG003	0	0	0	0	0	0	0		0	0	0	0	0	0	0	0	0	0	0	0	0	0	0	0		0	0	0	0	0	0	0	0	1	0	0	0	0	0	0	0		0	0	0	7	1	2
280	AC186785.4_FG002	0	0	0	0	0	0	0		0	0	0	0	0	0	0	0	0	0	0	0	0	0	0	0		0	0	0	0	0	0	0	0	0	0	0	0	0	0	0	0		1	3	1	1	2	3
281	AC186789.4_FG001	0	0	0	0	0	0	0		0	0	0	0	0	0	0	0	0	0	0	0	0	0	0	0		0	0	0	0	0	0	0	0	0	0	0	0	0	0	0	0		0	0	1	0	0	0
282	AC186800.3_FG005	0	0	0	0	0	0	0		0	0	0	0	0	0	0	0	0	0	0	0	0	0	0	0		0	0	0	0	0	0	0	0	0	0	0	0	0	0	0	0		0	0	1	1	0	1
283	AC186807.4_FG002	0	0	0	0	0	0	0		0	0	0	0	0	0	0	0	0	0	0	0	0	0	0	0		0	0	0	0	0	0	0	0	0	0	0	0	0	0	0	0		0	0	0	0	0	0
284	AC186815.3_FG003	0	0	0	0	0	0	0		0	0	0	0	0	0	0	0	0	0	0	0	0	0	0	0		0	0	0	0	0	0	0	0	0	0	0	0	0	0	0	0		1	1	1	1	0	1
285	AC186828.3_FG001	0	0	0	0	0	0	0		0	0	0	0	0	0	0	0	0	0	0	0	0	0	0	0		0	0	0	0	0	0	0	0	0	0	0	0	0	0	0	0		0	0	0	0	1	0
286	AC186845.4_FG009	0	0	0	0	0	0	0		0	0	0	0	0	0	0	0	0	0	0	0	0	0	0	0		0	0	0	0	0	0	0	0	0	0	0	0	0	0	0	0		0	0	0	0	0	0
287	AC186897.4_FG016	0	0	0	0	0	0	0		0	0	0	0	0	0	0	0	0	0	0	0	0	0	0	0		0	0	0	0	0	0	0	0	0	0	0	0	0	0	0	0		0	1	0	1	0	0
288	AC186902.4_FG006	0	0	0	0	0	0	0		0	0	0	0	0	0	0	0	0	0	0	0	0	0	0	0		0	0	0	0	0	0	0	0	0	0	0	0	0	0	0	0		0	0	0	0	0	0
289	AC186902.4_FG009	0	0	0	0	0	0	0		0	0	0	0	0	0	0	0	0	0	0	0	0	0	0	0		0	0	0	0	0	0	0	0	0	0	0	0	0	0	0	0		0	0	0	0	0	0
290	AC186904.4_FG007	0	0	0	0	0	0	0		0	0	0	0	0	0	0	0	0	0	0	0	0	0	0	0		0	0	0	0	0	0	0	0	0	0	0	0	0	0	0	0		2	1	1	0	1	2
291	AC186905.3_FG013	0	0	0	0	0	0	0		0	0	0	0	0	0	0	0	0	0	0	0	0	0	0	0		0	0	0	0	0	0	0	0	0	0	0	0	0	0	0	0		0	0	0	0	0	0
292	AC187037.4_FG008	0	0	1	0	0	0	0		0	0	0	0	0	0	0	0	0	0	0	0	0	0	0	0		0	0	0	0	0	0	0	0	0	0	0	0	0	0	0	0		0	2	0	0	0	0
293	AC187046.3_FG009	0	0	0	0	0	0	0		0	0	0	0	0	0	0	0	0	0	0	0	0	0	0	0		0	0	0	0	0	0	0	0	0	0	0	0	0	0	0	0		0	2	0	2	1	0
294	AC187056.3_FG002	0	0	0	0	0	0	0		0	0	0	0	0	0	0	0	0	0	0	0	0	0	0	0		0	0	0	0	0	0	0	0	0	0	0	0	0	0	0	0		1	3	4	0	0	0
295	AC187065.3_FG003	0	0	0	0	0	0	0		0	0	0	0	0	0	0	0	0	0	0	0	0	0	0	0		0	0	0	0	0	0	0	0	0	0	0	0	0	0	0	0		0	0	0	0	0	0
296	AC187067.4_FG001	0	0	0	0	0	0	0		0	0	0	0	0	0	0	0	0	0	0	0	0	0	0	0		0	0	0	0	0	0	0	0	0	0	0	0	0	0	0	0		1	0	0	0	1	0
297	AC187072.4_FG001	0	0	0	0	0	0	0		0	0	0	0	0	0	0	0	0	0	0	0	0	0	0	0		0	0	0	0	0	0	0	0	0	0	0	0	0	0	0	0		0	1	0	0	1	0
298	AC187072.4_FG002	0	0	0	0	0	0	0		0	0	0	0	0	0	0	0	0	0	0	0	0	0	0	0		0	0	0	0	0	0	0	0	0	0	0	0	0	0	0	0		0	0	0	1	1	0
299	AC187080.3_FG006	0	0	0	0	0	0	0		0	0	0	0	0	0	0	0	0	0	0	0	0	0	0	0		0	0	0	0	0	0	0	0	0	0	0	0	0	0	0	0		0	0	0	0	0	1
300	AC187080.3_FG007	0	0	0	0	0	0	0		0	0	0	0	0	0	0	0	0	0	1	0	0	0	0	0		0	0	0	0	0	0	0	0	0	0	0	0	0	0	0	0		0	3	0	0	1	1
301	AC187082.3_FG003	0	0	0	0	0	0	0		0	0	0	0	0	0	0	0	0	0	0	0	0	0	0	0		0	0	0	0	0	0	0	0	0	0	0	0	0	0	0	0		0	0	0	0	0	0
302	AC187086.3_FG004	0	0	0	0	0	0	0		0	0	0	0	0	0	0	0	0	0	0	0	0	0	0	0		1	0	0	0	0	0	0	0	0	0	0	0	0	0	0	0		0	1	1	1	0	3
303	AC187088.3_FG002	0	0	0	0	0	0	0		0	0	0	0	0	0	0	0	0	0	0	0	0	0	0	0		0	0	0	0	0	0	0	0	0	0	0	0	0	0	0	0		0	1	0	1	0	0
304	AC187090.3_FG003	0	0	0	0	0	0	0		0	0	0	0	0	0	0	0	0	0	0	0	0	0	0	0		0	0	0	0	0	0	0	0	0	0	0	0	0	0	0	0		0	0	0	0	2	0
305	AC187090.3_FG011	0	0	0	0	0	0	0		15	0	8	1	11	0	10	1	0	11	0	14	0	12	2	18		7	10	6	6	7	4	5	12	6	4	3	13	8	3	5	6		39	19	41	28	36	25
306	AC187092.6_FG003	0	0	0	0	0	0	0		0	0	0	0	0	0	0	0	0	0	0	0	0	0	0	0		0	0	0	0	0	0	0	0	0	0	0	0	0	0	0	0		3	1	1	1	1	1
307	AC187096.5_FG001	0	0	0	0	0	0	0		0	0	0	0	0	0	0	0	1	0	0	0	1	0	0	0		0	0	0	0	0	0	0	0	2	0	1	0	0	0	0	0		1	5	3	5	1	4
308	AC187098.4_FG011	0	0	0	0	0	0	0		0	0	0	0	0	0	0	0	0	0	0	0	0	0	0	0		0	0	0	0	0	0	0	0	0	0	0	0	0	0	0	0		218	176	192	164	206	161
309	AC187099.5_FG005	0	0	0	0	0	0	0		0	0	0	0	0	0	0	0	0	0	0	0	0	0	0	0		0	0	0	0	0	0	0	0	0	0	0	0	0	0	0	0		0	0	0	0	0	0
310	AC187142.3_FG007	0	0	0	0	0	0	0		0	0	0	0	0	0	0	0	0	2	0	0	0	0	0	1		0	0	0	0	0	0	0	0	0	0	0	0	0	1	0	0		0	2	0	0	0	0
311	AC187157.4_FG001	0	0	0	0	1	1	1		68	0	61	0	54	0	55	0	1	72	0	54	0	52	0	56		14	26	26	39	30	51	32	53	16	37	23	32	29	30	24	40		217	201	159	125	184	146
312	AC187157.4_FG002	0	0	0	0	0	0	0		54	2	52	0	73	0	75	0	1	47	2	49	0	75	1	78		23	23	17	24	60	37	46	43	39	42	27	25	42	40	41	44		328	324	315	391	329	280
313	AC187157.4_FG005	0	0	0	0	1	0	0		47	0	54	0	44	1	50	0	0	8	0	22	0	21	1	36		32	16	14	6	24	22	30	19	26	17	22	14	25	27	15	16		986	715	866	915	808	625
314	AC187160.3_FG003	0	0	0	0	0	0	0		0	0	0	0	1	0	1	0	0	0	0	0	0	0	0	0		1	0	0	0	0	0	0	0	1	0	0	0	0	0	0	0		0	1	1	1	0	1
315	AC187207.3_FG006	0	0	0	0	0	0	0		0	0	0	0	0	0	0	0	0	0	0	0	0	0	0	0		0	0	1	0	0	0	0	0	0	0	0	0	0	0	0	0		0	4	1	2	1	1
316	AC187209.5_FG003	0	0	0	0	0	0	0		0	0	0	0	0	0	0	0	0	0	0	0	0	0	0	0		0	0	0	0	0	0	0	0	0	0	0	0	0	0	0	0		0	0	1	0	0	1
317	AC187209.5_FG010	0	0	0	0	0	0	0		0	0	0	0	0	0	0	0	0	0	0	0	0	0	0	0		0	0	0	0	0	0	0	0	0	0	0	0	0	0	0	0		0	0	0	0	0	0
318	AC187212.3_FG011	0	0	0	0	0	0	0		0	0	1	0	0	0	0	0	0	0	0	0	0	0	0	1		0	0	0	0	0	0	0	0	0	1	0	1	0	0	0	0		2	0	2	2	1	2
319	AC187217.4_FG004	0	0	0	0	0	0	0		0	0	0	0	0	0	0	0	0	0	0	0	0	0	0	0		0	0	0	0	0	0	0	0	0	0	0	0	0	0	0	0		9	14	19	9	10	17
320	AC187222.4_FG001	0	0	0	0	0	0	0		0	0	0	0	0	0	0	0	0	0	0	0	0	0	0	0		0	0	0	0	0	0	0	0	0	0	0	0	0	0	0	0		3	1	2	2	1	3
321	AC187235.3_FG003	0	0	0	0	0	0	0		0	0	0	0	0	0	0	0	0	0	0	0	0	0	0	0		0	0	0	0	0	0	0	0	0	0	0	0	0	0	0	0		0	0	0	0	0	0
322	AC187241.4_FG009	0	0	0	0	0	0	0		0	0	0	0	0	0	0	0	0	0	0	0	0	0	0	0		0	0	0	0	0	0	0	0	0	0	0	0	0	0	0	0		0	0	1	0	0	1
323	AC187243.3_FG005	0	0	0	0	0	0	0		0	0	0	0	0	0	0	0	0	0	0	0	0	0	1	0		0	0	0	0	0	0	0	0	1	0	0	0	1	0	0	0		0	1	2	2	3	3
324	AC187262.4_FG007	0	0	0	0	1	1	1		47	0	28	0	18	0	26	0	0	25	0	18	0	18	0	19		25	17	23	12	13	14	23	10	16	9	21	15	16	9	17	11		4955	1261	3974	2745	3068	1172
325	AC187263.4_FG001	0	0	0	0	0	0	0		3	0	3	0	0	0	1	0	0	0	0	0	0	0	0	0		1	0	2	0	1	0	1	0	0	0	2	0	0	0	0	0		25	0	9	2	15	3
326	AC187279.3_FG003	0	0	0	0	0	0	0		0	0	0	0	0	0	0	0	0	0	0	0	0	0	0	0		0	0	0	0	0	0	0	0	0	0	0	0	0	0	0	0		1	0	1	0	0	1
327	AC187279.3_FG004	0	0	0	0	0	0	0		0	0	0	0	0	0	0	0	0	0	0	0	0	0	0	0		0	0	0	0	0	0	0	0	0	0	0	0	0	0	0	0		1	2	2	3	0	2
328	AC187283.3_FG005	0	0	0	0	0	0	0		0	0	0	0	0	0	0	0	0	0	0	0	0	0	0	0		0	0	0	0	0	0	0	0	0	0	0	0	0	0	0	0		4	7	4	11	7	1
329	AC187393.3_FG001	0	0	1	0	0	0	0		0	0	0	0	0	0	0	0	0	3	0	5	0	2	0	2		0	0	0	1	0	1	1	2	0	3	1	0	0	0	1	4		1	15	11	8	0	18
330	AC187404.3_FG003	0	0	0	0	0	0	0		0	0	0	0	0	0	0	0	0	0	0	0	0	0	0	0		0	0	0	0	0	0	0	0	0	0	0	0	0	0	0	0		0	3	2	0	1	2
331	AC187404.3_FG006	0	0	0	0	0	0	0		0	0	0	0	0	0	0	0	0	0	0	0	0	0	0	0		0	0	0	0	0	0	0	1	0	0	0	1	0	0	0	0		0	5	3	7	0	11
332	AC187460.4_FG002	0	0	0	0	0	0	0		0	0	0	0	0	0	0	0	0	0	0	0	0	0	0	0		0	0	0	0	0	0	0	0	0	0	0	0	0	0	0	0		1	0	0	0	0	0
333	AC187469.3_FG005	0	0	0	0	0	0	0		0	0	0	0	0	0	0	0	0	0	0	0	0	0	0	0		0	0	0	0	0	0	0	0	0	0	0	0	0	0	0	0		1	0	1	0	1	0
334	AC187485.3_FG001	0	0	0	0	0	0	0		0	0	0	0	0	0	0	0	0	0	0	0	0	0	0	0		0	0	0	0	0	0	0	0	0	0	0	0	0	0	0	0		0	0	1	1	1	1
335	AC187551.3_FG002	0	0	0	0	1	0	0		56	1	41	0	26	0	15	0	0	39	0	23	0	16	0	18		16	14	35	19	13	7	9	11	25	23	18	28	22	9	21	13		108	90	79	92	95	60
336	AC187560.5_FG003	0	0	0	0	0	0	0		0	0	0	0	0	0	1	0	0	0	0	0	0	0	1	1		1	0	1	0	0	0	0	0	0	0	1	1	1	0	0	0		0	0	2	1	1	0
337	AC187567.4_FG004	0	0	0	0	0	0	0		0	0	0	0	0	0	0	0	0	0	0	0	0	0	0	0		0	0	0	0	0	0	0	0	0	0	0	0	0	0	0	0		9	16	11	9	8	7
338	AC187782.4_FG009	0	0	0	0	0	0	0		0	0	0	0	0	0	0	0	0	0	0	0	0	0	0	0		0	0	0	0	0	0	0	0	0	0	0	0	0	0	0	0		0	1	1	1	1	3
339	AC187789.3_FG001	0	0	0	0	0	0	0		0	0	0	0	0	0	0	0	0	0	0	0	0	0	0	0		0	0	0	0	0	0	0	0	0	0	0	0	0	0	0	0		0	0	1	1	0	0
340	AC187800.4_FG003	0	0	0	0	0	0	0		0	0	0	0	0	0	0	0	0	0	0	0	0	0	0	0		0	0	0	0	0	0	0	0	0	0	0	0	0	0	0	0		0	0	0	0	0	0
341	AC187802.3_FG008	0	0	0	0	0	0	0		0	0	0	0	0	0	0	0	0	0	0	0	0	0	0	0		0	0	0	0	0	0	0	0	0	0	0	0	0	0	0	0		1	1	2	0	1	0
342	AC187809.3_FG005	0	0	0	0	0	0	0		0	0	0	0	0	0	0	0	0	0	0	0	0	0	0	0		0	0	0	0	0	0	0	0	0	0	0	0	0	0	0	0		0	0	0	0	0	0
343	AC187813.3_FG002	0	0	0	0	0	0	0		0	0	0	0	0	0	0	0	0	0	0	0	0	0	0	0		0	0	0	0	0	0	0	0	0	0	0	0	0	0	0	0		0	1	0	2	0	1
344	AC187818.3_FG004	0	0	0	0	0	0	0		0	0	0	0	0	0	0	0	0	0	0	0	0	0	0	0		0	0	0	0	0	0	0	0	0	0	0	0	0	0	0	0		0	0	1	0	0	0
345	AC187826.3_FG007	0	0	0	0	0	0	0		0	0	0	0	0	0	0	0	0	0	0	0	0	0	0	0		0	0	0	0	0	0	0	0	0	0	0	0	0	0	0	0		0	0	0	0	0	0
346	AC187843.3_FG001	0	0	0	0	0	0	0		0	0	0	0	0	0	0	0	0	0	0	0	0	0	0	0		0	0	0	0	0	0	0	0	0	0	0	0	0	0	0	0		0	0	0	1	0	0
347	AC187843.3_FG006	0	0	0	0	0	0	0		2	0	1	0	4	0	3	0	0	3	0	2	0	4	0	3		1	1	0	0	3	5	1	3	1	1	1	2	3	0	2	3		40	27	36	44	39	25
348	AC187843.3_FG010	0	0	0	0	0	0	0		0	0	0	0	0	0	0	0	0	0	0	0	0	0	0	0		0	0	0	0	0	0	0	0	0	0	0	0	0	0	0	0		0	0	0	0	0	0
349	AC187870.3_FG002	0	0	0	0	0	0	0		0	0	0	0	0	0	0	0	0	0	0	0	0	0	0	0		0	0	0	0	0	0	0	0	0	0	0	0	0	0	0	0		0	0	0	0	1	0
350	AC187872.3_FG005	0	0	0	0	0	0	0		0	0	0	0	0	0	0	0	0	0	0	0	0	0	0	0		0	0	0	0	0	0	0	0	0	0	0	0	0	0	0	0		0	0	1	0	0	0
351	AC187879.3_FG001	0	0	0	0	0	0	0		0	0	0	0	0	0	0	0	0	0	0	0	0	0	0	0		0	0	0	0	0	0	0	0	0	0	0	0	0	0	0	0		2	1	2	0	0	0
352	AC187885.3_FG002	0	0	0	0	0	0	0		0	0	1	0	0	0	0	0	0	0	0	0	0	0	0	0		0	0	0	0	0	0	0	0	0	0	0	0	0	0	0	0		2	3	0	1	2	2
353	AC187887.3_FG008	0	0	0	0	0	0	0		0	0	0	0	0	0	0	0	0	0	0	0	0	0	0	0		0	0	0	0	0	0	0	0	0	0	0	0	0	0	0	0		2	0	0	0	0	0
354	AC187891.3_FG006	0	0	0	0	1	0	0		5	0	7	1	2	0	3	0	0	0	0	1	0	0	0	0		3	0	5	0	0	0	1	0	1	0	3	0	1	0	0	2		37	23	33	19	39	23
355	AC187895.2_FG001	0	0	0	0	0	0	0		0	0	0	0	0	0	0	0	0	0	0	0	0	0	0	0		0	0	0	0	0	0	0	0	0	0	0	0	0	0	0	0		0	0	1	0	0	0
356	AC187895.2_FG002	0	0	0	0	0	0	0		0	0	0	0	0	0	0	0	0	0	0	0	0	0	0	0		0	0	0	0	0	0	0	0	0	0	0	0	0	0	0	0		0	0	0	0	0	0
357	AC187896.3_FG006	0	0	0	0	0	0	0		0	0	0	0	0	0	0	0	0	0	0	0	0	0	0	0		0	0	0	0	0	0	0	0	0	0	0	0	0	0	0	0		0	0	0	0	0	0
358	AC187899.3_FG002	0	0	1	0	0	0	0		0	0	0	0	0	0	0	0	0	0	0	0	0	0	0	0		0	0	0	0	0	0	0	0	0	0	0	0	0	0	0	0		0	12	3	4	0	9
359	AC187901.4_FG004	0	0	0	0	0	0	0		0	0	0	0	0	0	0	0	0	0	0	0	0	0	0	0		0	0	0	0	0	0	0	0	0	0	0	0	0	0	0	0		1	2	1	0	1	0
360	AC187903.3_FG004	0	0	0	0	0	0	0		0	0	0	0	0	0	0	0	0	0	0	0	0	0	0	0		0	0	0	0	0	0	0	0	0	0	0	0	0	0	0	0		0	0	0	0	0	0
361	AC187910.5_FG002	0	0	0	0	0	0	0		0	0	0	0	0	0	0	0	0	0	0	0	0	0	0	0		0	0	0	0	0	0	0	0	0	0	0	0	0	0	0	0		0	0	0	0	0	0
362	AC188000.3_FG003	0	0	0	0	0	0	0		0	0	0	0	0	0	0	0	0	0	0	1	0	0	0	0		0	0	0	0	0	0	0	2	0	0	0	0	0	1	0	0		1	2	2	1	1	1
363	AC188001.3_FG009	0	0	0	0	0	0	0		0	0	0	0	1	0	0	0	0	0	1	0	0	0	1	0		0	0	1	0	0	0	1	0	1	0	1	0	0	0	0	0		3	1	4	3	2	1
364	AC188003.3_FG012	0	0	0	0	0	0	0		0	0	0	0	0	0	0	0	0	0	0	0	0	0	0	0		1	0	0	0	1	0	0	0	0	0	0	0	0	0	0	0		0	2	2	0	0	0
365	AC188023.3_FG005	0	0	0	0	1	0	0		32	1	35	0	36	0	43	0	0	19	0	20	2	36	1	27		17	8	10	9	19	15	22	14	15	19	13	9	18	13	13	22		186	132	162	201	189	124
366	AC188023.3_FG011	0	0	0	0	0	0	0		0	0	0	0	0	0	0	0	0	0	0	1	0	0	0	0		0	0	0	2	0	0	0	1	0	0	0	0	0	0	0	3		1	3	0	0	0	3
367	AC188036.3_FG003	0	0	0	0	0	0	0		0	0	0	0	0	0	0	0	0	0	0	0	0	0	0	0		0	0	0	0	0	0	0	0	0	0	0	0	0	0	0	0		5	3	6	4	4	3
368	AC188128.3_FG002	0	0	0	0	0	0	0		0	0	0	0	0	0	0	0	0	0	0	0	0	0	0	0		0	0	0	0	0	0	0	0	0	0	0	0	0	0	0	0		0	1	0	0	0	1
369	AC188134.2_FG011	0	0	0	0	0	0	0		1	0	0	0	0	0	0	0	0	0	0	0	0	0	0	0		0	0	0	1	0	0	0	0	0	0	0	0	1	0	1	0		4	1	0	1	1	3
370	AC188195.2_FG003	0	0	0	0	0	0	0		0	0	0	0	0	0	0	0	0	0	0	0	0	0	0	0		0	0	0	0	0	0	0	0	0	0	0	0	0	0	0	0		0	0	0	0	0	0
371	AC188195.2_FG004	0	0	0	0	0	0	0		0	0	0	0	0	0	0	0	0	0	0	0	0	0	0	0		0	0	0	0	0	0	0	0	0	0	0	0	0	0	0	0		0	0	0	0	0	0
372	AC188195.2_FG005	0	0	0	0	0	0	0		0	0	0	0	0	0	0	0	0	0	0	0	0	0	0	0		0	0	0	0	0	0	0	0	0	0	0	0	0	0	0	0		0	0	0	0	0	0
373	AC188296.3_FG004	0	0	0	0	0	0	0		1	1	1	0	0	1	0	0	0	0	0	0	0	0	0	2		1	0	0	1	0	0	0	1	1	1	0	0	0	1	0	0		2	0	1	3	4	1
374	AC188582.3_FG002	0	0	0	0	0	0	0		0	0	0	0	0	0	0	0	0	0	0	0	0	0	0	0		0	0	0	0	0	0	0	0	0	0	0	0	0	0	0	0		1	0	1	0	0	0
375	AC188583.4_FG003	0	0	0	0	0	0	0		1	0	0	0	0	0	0	0	0	2	0	3	0	3	0	1		0	1	0	0	1	2	0	0	0	2	2	1	0	1	0	1		3	15	7	9	2	14
376	AC188612.3_FG009	0	0	0	0	0	0	0		0	0	0	0	0	0	0	0	0	0	0	0	0	0	0	0		0	0	0	0	0	0	0	0	0	0	0	0	0	0	0	0		0	0	0	0	0	0
377	AC188710.4_FG006	0	0	0	0	0	0	0		0	0	0	0	0	0	0	0	0	0	0	0	0	0	0	1		1	0	0	0	0	0	0	0	0	0	1	0	0	0	0	0		7	13	10	10	3	11
378	AC188718.3_FG005	0	0	0	0	0	0	0		0	0	0	0	0	0	0	0	0	0	0	0	0	0	0	0		0	0	0	0	0	0	0	0	0	0	0	0	0	0	0	0		0	0	0	0	0	0
379	AC188718.3_FG011	0	0	0	0	0	0	0		0	0	0	0	0	0	0	0	0	0	0	0	0	0	0	0		0	0	0	0	0	0	0	0	0	0	0	0	0	0	0	0		0	0	0	0	1	0
380	AC188718.3_FG015	0	0	0	0	0	0	0		0	0	0	0	0	0	0	0	0	0	0	0	0	0	0	0		0	0	0	0	0	0	0	0	0	0	0	0	0	0	0	0		1	1	0	0	1	1
381	AC188721.3_FG001	0	0	0	0	0	0	0		0	0	0	0	0	0	0	0	0	0	0	0	0	0	0	0		0	0	0	0	0	0	0	0	0	0	0	0	0	0	0	0		0	0	0	0	1	1
382	AC188722.3_FG002	0	0	0	0	0	0	0		0	0	0	0	0	0	0	0	0	1	0	0	0	0	0	0		0	0	0	0	0	0	0	0	0	0	0	0	0	0	0	0		0	3	1	0	0	0
383	AC188723.3_FG001	0	0	0	0	0	0	0		0	0	0	0	0	0	0	0	0	0	0	0	0	0	0	0		0	0	0	0	0	0	0	0	0	0	0	0	0	0	0	0		1	0	0	1	2	0
384	AC188724.3_FG006	0	0	0	0	0	0	0		0	0	0	0	0	0	0	0	0	0	0	0	0	0	0	0		0	0	0	0	0	0	0	0	0	0	0	0	0	0	0	0		1	1	0	0	0	2
385	AC188727.3_FG003	0	0	0	0	0	0	0		0	0	0	0	0	0	0	0	0	0	0	0	0	0	0	0		1	0	0	0	0	0	0	0	0	0	0	0	0	0	0	0		2	0	5	6	3	2
386	AC188735.3_FG001	0	0	0	0	0	0	0		0	0	0	0	0	0	0	0	0	0	0	0	0	0	0	0		0	0	0	0	0	0	0	0	0	0	0	0	0	0	0	0		0	0	0	0	0	0
387	AC188744.3_FG009	0	0	0	0	0	0	0		0	0	0	0	0	0	0	0	0	0	0	0	0	0	0	0		0	0	0	0	0	0	0	0	0	0	0	0	0	0	0	0		0	0	0	1	0	0
388	AC188745.3_FG001	0	0	0	0	0	0	0		0	0	0	0	0	0	0	0	0	0	0	1	0	0	0	0		0	0	0	0	0	0	0	0	0	0	0	0	0	0	0	0		0	0	0	0	0	1
389	AC188752.3_FG008	0	0	0	0	0	0	0		0	0	0	0	0	0	0	0	0	0	1	0	0	0	0	0		0	0	0	0	0	0	0	0	0	0	0	0	0	0	0	0		1	2	0	0	0	2
390	AC188753.3_FG004	0	0	0	0	0	0	0		0	0	0	0	0	0	0	0	0	0	0	0	0	0	0	0		0	0	0	0	0	0	0	0	0	0	0	0	0	0	0	0		0	0	0	0	0	2
391	AC188755.3_FG001	0	0	0	0	0	0	0		0	0	0	0	0	0	0	0	0	0	0	0	0	0	0	0		0	0	0	0	0	0	0	0	0	0	0	0	0	0	0	0		1	1	2	0	2	0
392	AC188756.2_FG004	0	0	0	0	0	0	0		0	0	0	0	0	0	0	0	0	0	0	0	0	0	0	0		0	0	0	0	0	0	0	0	0	0	0	0	0	0	0	0		0	0	0	0	0	0
393	AC188757.4_FG004	0	0	0	0	0	0	0		0	0	0	0	0	0	0	0	0	0	0	0	0	0	0	0		0	0	0	0	0	0	0	0	0	0	0	0	0	0	0	0		1	0	0	0	0	0
394	AC188831.3_FG005	0	0	0	0	1	0	0		2	0	1	0	3	0	5	0	0	1	1	0	0	4	0	0		2	0	1	0	3	1	2	0	0	0	2	0	1	1	1	0		5	1	7	0	2	1
395	AC188838.3_FG005	0	0	0	0	1	1	1		92	0	89	2	148	1	135	0	0	10	0	7	0	24	0	29		48	11	18	5	68	17	107	16	49	14	32	12	75	16	45	23		302	45	195	192	256	35
396	AC188964.3_FG002	0	0	0	0	0	0	0		0	0	0	0	0	0	0	0	1	0	0	0	0	0	0	0		0	0	0	0	1	0	0	0	0	0	2	0	0	0	0	0		1	3	3	1	1	4
397	AC188978.3_FG008	0	0	0	0	0	0	0		0	0	0	0	0	0	0	0	0	0	0	0	0	0	0	0		0	0	0	0	0	0	0	0	0	0	0	0	0	0	0	0		0	0	0	2	0	2
398	AC189044.2_FG005	0	0	0	0	0	0	0		0	0	0	0	0	0	0	0	0	0	0	0	0	0	0	0		0	0	0	0	0	0	0	0	0	0	0	0	0	0	0	0		10	8	7	10	3	10
399	AC189048.2_FG001	0	0	0	0	0	0	0		0	0	0	0	0	0	0	0	0	0	0	0	0	0	0	0		0	0	0	0	0	0	0	0	0	0	0	0	0	0	0	0		1	0	2	1	1	0
400	AC189052.3_FG003	0	0	0	0	0	0	0		0	0	0	0	0	0	0	0	0	0	0	0	0	0	0	0		0	0	0	0	0	0	0	0	0	0	1	0	0	0	0	0		2	1	0	2	0	3
401	AC189056.3_FG001	0	0	0	0	0	0	0		0	0	0	0	0	0	0	0	0	0	0	0	0	0	0	0		0	0	0	0	0	0	0	0	0	0	0	0	0	0	0	0		0	0	0	0	0	1
402	AC189060.4_FG007	0	0	0	0	0	0	0		0	0	0	0	0	0	0	0	0	0	0	0	0	0	0	0		0	0	0	0	0	0	0	0	0	0	0	0	0	0	0	0		1	1	0	0	0	0
403	AC189078.3_FG004	0	0	0	0	0	0	0		0	0	0	0	0	0	0	0	0	0	0	0	0	0	0	0		0	0	1	0	0	0	0	0	0	0	0	0	0	0	0	0		0	0	1	2	0	0
404	AC189084.3_FG002	0	0	0	0	0	0	0		0	0	0	0	0	0	0	0	0	0	0	0	0	0	0	0		0	0	0	0	0	0	0	0	0	0	0	0	0	0	0	0		0	0	0	0	0	0
405	AC189280.3_FG001	0	0	0	0	0	0	0		0	0	0	0	0	0	0	0	0	4	0	2	1	0	0	2		0	2	0	2	0	0	0	0	0	0	0	2	0	1	0	0		0	10	4	2	0	6
406	AC189694.3_FG003	0	0	0	0	0	0	0		0	0	0	0	0	0	0	0	0	0	0	0	0	0	0	0		0	0	0	0	0	0	0	0	0	0	0	0	0	0	0	0		0	2	0	1	1	3
407	AC189750.4_FG004	0	0	0	0	0	1	0		83	0	68	0	110	0	88	0	1	42	0	37	1	82	1	105		20	29	14	12	34	35	42	33	67	56	30	30	84	53	67	52		311	164	174	450	237	127
408	AC189752.3_FG003	0	0	0	0	0	0	0		0	0	0	0	0	0	0	0	0	0	0	0	0	0	0	0		0	0	0	0	0	0	0	0	0	0	0	0	0	0	0	0		0	0	1	1	0	0
409	AC189753.3_FG002	0	0	0	0	0	0	0		0	0	0	0	0	0	0	0	0	0	0	0	0	0	0	0		0	0	0	0	0	0	0	0	0	0	1	0	0	0	0	0		2	1	2	0	0	0
410	AC189770.3_FG002	0	0	0	0	0	0	0		5	0	2	1	1	0	2	0	0	0	1	0	0	0	0	0		1	0	1	0	2	0	1	0	0	0	2	0	0	0	2	0		16	2	4	4	9	3
411	AC189771.3_FG001	0	0	0	0	0	0	0		0	0	0	0	0	0	0	0	0	0	0	0	0	0	0	0		0	0	0	0	0	0	0	0	0	0	0	0	0	0	0	0		0	1	1	1	1	2
412	AC189792.3_FG005	0	0	0	0	0	0	0		0	0	1	0	0	0	0	0	0	0	0	2	0	0	0	0		0	0	0	0	0	0	0	0	0	0	0	0	0	0	0	0		2	4	1	3	6	3
413	AC189795.3_FG001	0	0	0	0	0	0	0		1	0	1	0	0	0	0	0	0	0	0	0	0	0	0	0		0	0	0	0	0	0	0	0	0	0	1	0	0	0	0	0		7	8	5	7	9	10
414	AC189796.3_FG004	0	0	0	0	0	0	0		0	0	0	0	0	0	0	0	0	0	0	0	0	0	0	0		0	0	0	0	0	0	0	0	0	0	0	0	0	0	0	0		2	1	1	0	1	1
415	AC189879.3_FG003	0	0	0	0	0	1	0		26	0	31	0	15	0	9	0	2	23	0	20	1	12	0	9		16	13	15	11	13	6	5	2	16	10	18	9	9	5	13	7		331	261	231	333	275	248
416	AC189883.3_FG002	0	0	0	0	0	0	0		0	0	0	0	0	0	0	0	0	0	0	0	0	0	0	0		0	0	0	0	0	0	0	0	0	0	0	0	0	0	0	0		2	2	4	2	1	1
417	AC190035.1_FG005	0	0	0	0	0	0	0		0	0	1	0	1	0	0	0	0	0	0	0	0	0	0	0		2	0	0	0	0	0	0	0	0	0	1	0	0	0	0	0		0	1	4	0	2	1
418	AC190225.2_FG001	0	0	0	0	0	0	0		0	0	0	0	0	0	0	0	0	0	0	0	0	0	0	0		0	0	0	0	0	0	0	0	0	0	0	0	0	0	0	0		2	1	1	1	1	0
419	AC190480.1_FG007	0	0	0	0	0	0	0		0	0	0	0	0	0	0	0	0	0	1	0	0	1	0	1		0	0	0	1	0	2	0	0	0	0	0	0	0	0	0	0		5	1	6	4	2	2
420	AC190485.1_FG004	0	0	0	0	0	0	0		0	0	1	0	0	0	0	0	0	0	0	0	0	0	0	0		0	0	0	0	0	0	0	0	0	0	0	0	0	0	0	0		0	0	0	0	1	0
421	AC190491.1_FG002	0	0	0	0	0	0	0		0	0	0	0	0	0	0	0	0	0	0	0	0	0	0	0		0	0	0	0	0	0	0	0	0	0	0	0	0	0	0	0		4	3	1	2	5	0
422	AC190496.1_FG002	0	0	0	0	0	0	0		0	0	0	0	0	0	0	0	0	0	0	0	0	0	0	0		0	0	0	0	0	0	0	0	0	0	0	0	0	0	0	0		9	1	6	11	5	1
423	AC190498.1_FG007	0	0	0	0	0	0	0		0	0	0	0	0	0	0	1	0	1	0	0	0	1	0	0		0	0	0	0	0	1	0	1	0	0	0	0	1	0	0	0		0	1	1	2	1	1
424	AC190507.1_FG007	0	0	0	0	0	0	0		0	0	0	0	0	0	0	0	0	0	0	0	0	0	0	0		0	0	0	0	0	0	0	0	0	0	0	0	0	0	0	0		0	0	2	0	0	1
425	AC190526.3_FG004	1	1	0	0	0	0	0		4	0	1	1	2	0	0	0	0	0	0	0	0	0	0	0		2	0	3	0	1	0	1	0	1	0	0	0	0	0	0	0		42	0	20	19	33	0
426	AC190544.2_FG004	0	1	0	0	0	0	0		5	0	4	0	1	0	3	0	0	0	0	0	0	0	0	0		1	0	2	0	2	0	1	0	2	0	1	0	1	0	2	0		78	2	43	31	67	0
427	AC190549.3_FG004	0	0	0	0	0	0	0		0	0	0	0	0	0	0	0	0	0	0	0	0	0	0	0		0	0	0	0	1	0	0	0	0	0	0	0	0	0	0	0		0	0	0	0	0	0
428	AC190560.2_FG002	0	0	0	0	0	0	0		0	0	0	0	0	0	0	0	0	0	0	0	0	0	0	0		0	0	0	0	0	0	0	0	0	0	0	0	0	0	0	0		0	0	0	0	0	0
429	AC190565.2_FG003	0	0	0	0	0	0	0		0	0	0	0	0	0	0	0	0	0	0	0	0	0	0	0		0	0	0	0	0	0	0	0	0	0	0	0	0	0	0	0		2	0	1	0	0	0
430	AC190570.3_FG003	0	0	0	0	0	0	0		0	0	0	0	0	0	0	0	0	0	0	0	0	0	0	0		0	0	0	0	0	0	0	0	0	0	0	0	0	0	0	0		0	1	1	1	0	2
431	AC190572.4_FG001	0	0	0	0	0	0	0		0	0	0	0	0	0	0	0	0	0	0	0	1	0	0	0		0	0	0	0	0	0	0	0	0	0	1	0	0	0	0	0		2	1	2	2	2	3
432	AC190576.2_FG002	0	0	0	0	0	0	0		0	0	0	0	0	0	0	0	0	0	0	0	0	0	0	0		0	0	0	0	0	0	0	0	0	0	0	0	0	0	0	0		0	0	0	0	0	0
433	AC190587.3_FG005	0	0	0	0	0	0	0		0	0	0	0	0	0	0	0	0	0	0	0	0	0	0	0		0	0	0	0	0	0	0	0	0	0	1	0	0	0	0	0		1	2	1	2	1	2
434	AC190589.2_FG002	0	0	0	0	0	0	0		0	0	0	0	0	0	0	0	0	0	0	0	0	0	0	0		0	0	0	0	0	0	0	0	0	0	0	0	0	0	0	0		0	0	0	0	1	0
435	AC190590.3_FG001	0	0	0	0	0	0	0		0	0	0	0	0	0	0	0	0	0	0	0	0	0	0	0		0	0	0	0	0	0	0	0	0	0	0	0	0	0	0	0		2	3	4	4	4	4
436	AC190609.3_FG001	0	0	0	0	0	0	0		0	0	0	0	0	0	0	0	0	0	0	0	0	0	0	0		0	0	0	0	0	0	0	0	0	0	0	0	0	0	0	0		9	17	6	5	3	6
437	AC190609.3_FG002	0	0	0	0	1	1	1		36	1	36	0	26	0	40	0	0	23	0	14	0	31	0	24		32	17	21	11	23	14	25	19	20	16	35	14	37	19	21	8		1107	1081	1193	1142	968	829
438	AC190609.3_FG003	0	0	0	0	0	0	0		0	0	0	0	0	0	0	0	0	0	0	0	0	0	0	0		0	0	0	0	0	0	0	0	0	0	0	0	0	0	0	0		145	136	130	130	132	108
439	AC190609.3_FG004	0	0	0	0	0	0	0		0	0	1	0	0	0	0	0	0	0	0	0	1	0	0	0		0	0	0	0	0	0	0	0	0	0	0	0	0	0	0	0		122	81	89	142	98	76
440	AC190609.3_FG005	0	0	0	0	0	0	0		0	0	0	0	0	0	0	0	0	0	0	0	0	0	0	0		0	0	0	0	0	0	0	0	0	0	0	0	0	0	0	0		1	1	0	2	1	1
441	AC190613.3_FG001	0	0	0	0	0	0	0		0	0	0	0	0	0	0	0	0	0	0	0	0	0	0	0		0	0	0	0	0	0	0	0	0	0	0	0	0	0	0	0		1	7	5	5	1	6
442	AC190614.3_FG004	0	0	0	0	0	0	0		0	0	0	0	0	0	0	0	0	0	0	0	0	0	0	0		0	0	0	0	0	0	0	0	0	0	0	0	0	0	0	0		0	1	0	0	0	0
443	AC190623.3_FG001	0	0	0	0	0	0	0		0	0	0	0	0	0	2	0	0	0	1	1	1	2	0	3		2	1	1	1	2	0	1	1	1	0	0	0	0	0	0	2		3	2	8	1	3	5
444	AC190623.3_FG002	0	0	0	0	1	1	1		5	1	9	0	1	0	3	0	0	27	1	106	0	8	0	12		6	8	22	66	1	2	0	2	22	63	17	49	1	11	1	4		20	134	71	435	77	548
445	AC190628.4_FG007	0	0	0	0	0	0	0		47	0	42	0	5	0	1	0	0	46	0	43	0	8	0	6		28	23	32	22	6	2	1	2	29	22	28	34	4	4	2	2		805	984	863	1020	851	955
446	AC190630.2_FG001	0	0	0	0	0	0	0		0	0	0	0	0	0	0	0	0	0	0	0	0	0	0	0		0	0	0	0	0	0	0	0	0	0	0	0	0	0	0	0		0	0	1	0	1	0
447	AC190632.2_FG004	0	0	0	0	0	0	0		0	0	0	0	0	0	0	0	0	0	0	0	0	0	0	0		0	0	0	0	0	0	0	0	1	0	0	0	0	0	0	0		1	2	2	3	1	2
448	AC190634.1_FG005	0	0	0	0	0	0	0		0	0	0	0	0	0	0	0	0	0	0	0	0	0	0	0		0	0	0	0	0	0	0	0	0	0	0	0	0	0	0	0		0	0	0	0	0	0
449	AC190636.3_FG005	0	0	0	0	0	0	0		39	0	24	1	52	0	48	0	0	16	0	14	1	51	0	41		16	10	8	11	25	24	17	32	14	17	14	17	18	23	26	24		167	117	147	159	150	116
450	AC190638.3_FG001	0	0	0	0	0	0	0		0	0	0	0	0	0	0	0	0	0	0	0	0	0	0	0		0	0	0	0	0	0	0	0	0	0	0	0	0	0	0	0		0	0	0	0	0	0
451	AC190643.4_FG011	0	0	0	0	0	0	0		1	0	0	0	0	0	0	0	0	0	0	1	0	0	0	1		0	0	0	0	0	1	0	0	0	0	0	1	0	0	0	0		2	4	1	0	0	2
452	AC190652.3_FG001	0	0	0	0	0	0	0		0	0	0	0	0	0	0	0	0	2	0	0	0	0	0	0		0	0	0	0	0	0	0	0	0	0	0	0	0	0	0	0		3	11	5	14	5	21
453	AC190665.3_FG006	0	0	0	0	0	0	0		0	0	0	0	0	0	0	0	0	0	0	0	0	0	0	0		0	0	0	0	0	0	0	0	0	0	0	0	0	0	0	0		0	1	0	0	0	0
454	AC190671.4_FG003	0	0	0	0	0	0	0		0	0	0	0	0	0	0	0	0	0	0	0	0	0	0	0		0	0	0	0	0	0	0	0	0	0	0	0	0	0	0	0		0	0	0	0	0	0
455	AC190677.3_FG003	0	0	0	0	0	0	0		0	0	1	0	0	0	0	0	0	0	0	0	0	0	0	0		0	0	0	0	0	0	0	0	1	0	0	0	0	0	0	0		0	0	2	1	1	0
456	AC190685.3_FG005	0	0	0	0	0	0	0		0	0	0	0	0	0	0	0	0	0	0	0	0	0	0	0		0	0	0	0	0	0	0	0	0	0	0	0	0	0	0	0		0	0	0	0	0	0
457	AC190688.3_FG006	0	0	0	0	0	0	0		0	0	0	0	0	0	1	0	0	0	0	0	0	0	1	0		0	2	0	0	0	0	0	0	0	0	0	0	0	0	0	0		0	2	7	3	2	3
458	AC190693.1_FG009	0	0	0	0	0	0	0		0	0	0	0	0	0	0	0	0	0	0	0	0	0	0	0		0	0	0	0	0	0	0	0	0	0	0	0	0	0	0	0		0	0	0	0	0	0
459	AC190695.3_FG003	0	0	0	0	0	0	0		0	0	0	0	0	0	0	0	0	0	0	0	0	0	0	0		0	0	0	0	0	0	0	0	0	0	0	0	0	0	0	0		0	0	0	0	0	0
460	AC190701.3_FG001	0	0	0	0	0	0	0		0	0	1	0	0	0	0	0	0	0	0	0	0	0	0	0		0	0	1	0	0	0	0	0	0	0	1	0	0	0	0	0		5	7	6	7	5	2
461	AC190716.3_FG001	0	0	0	0	0	0	0		0	0	0	0	0	0	0	0	0	0	0	0	0	0	0	0		0	0	0	0	0	0	0	0	0	0	0	0	0	0	0	0		0	0	1	0	0	0
462	AC190734.2_FG003	0	0	0	0	0	0	0		0	0	0	0	0	0	0	0	0	0	0	0	0	0	0	0		0	0	0	0	0	0	0	0	0	0	0	0	0	0	0	0		0	5	4	0	1	1
463	AC190740.2_FG004	0	0	0	0	0	0	0		0	0	0	0	0	0	0	0	0	0	0	0	0	0	0	0		0	0	0	0	0	0	0	0	0	0	0	0	0	0	0	0		0	3	0	0	0	2
464	AC190743.3_FG012	0	0	0	0	0	0	0		0	0	0	0	0	0	0	0	0	0	0	0	0	0	0	0		0	0	0	0	0	0	0	0	0	0	0	0	0	0	0	0		19	29	19	23	21	24
465	AC190744.2_FG010	0	0	0	0	0	0	0		0	0	0	0	0	0	0	0	0	0	0	0	0	0	0	0		0	0	0	0	0	0	0	0	0	0	0	0	0	0	0	0		0	0	0	0	0	0
466	AC190749.3_FG006	0	0	0	0	0	0	0		0	0	0	0	0	0	0	0	0	0	0	0	0	0	0	0		0	0	0	0	0	0	0	0	0	0	0	0	0	0	0	0		1	0	0	0	0	1
467	AC190750.2_FG014	0	0	0	0	0	0	0		0	0	0	0	0	0	0	0	0	0	0	0	0	0	0	0		0	0	0	0	0	0	0	0	0	0	0	0	0	0	0	0		134	104	82	96	97	85
468	AC190751.4_FG008	0	0	0	0	0	0	0		0	0	0	0	0	0	0	0	0	0	0	0	0	0	0	0		0	0	0	0	0	0	0	0	0	0	0	0	0	0	0	0		0	0	0	0	0	0
469	AC190756.4_FG007	0	0	0	0	0	0	0		0	0	0	0	0	0	0	0	0	0	0	0	0	0	0	0		0	0	0	0	0	0	0	0	0	0	0	0	0	0	0	0		0	0	0	0	0	0
470	AC190757.3_FG001	0	0	0	0	0	0	0		0	0	0	0	0	0	0	0	0	0	0	0	0	0	0	0		0	0	0	0	0	0	0	0	0	0	0	0	0	0	0	0		2	2	3	4	2	2
471	AC190763.3_FG002	0	0	0	0	0	0	0		0	0	0	0	1	0	0	0	0	0	0	0	0	0	0	0		1	0	0	0	0	0	1	0	0	0	0	0	0	0	0	0		0	1	3	1	0	0
472	AC190771.2_FG003	0	0	0	0	0	0	0		0	0	0	0	0	0	0	0	0	0	0	0	0	0	0	0		0	0	0	0	0	0	0	0	0	0	0	0	0	0	0	0		0	0	1	0	3	0
473	AC190772.4_FG011	0	0	0	0	0	0	0		0	0	0	0	0	0	0	0	0	0	0	0	0	0	0	0		0	0	0	0	0	0	0	0	0	0	0	0	0	0	0	0		2	7	1	5	3	4
474	AC190788.2_FG004	0	0	0	0	0	0	0		0	0	0	0	0	0	0	0	0	2	0	0	0	0	0	0		0	0	0	0	0	0	0	0	1	0	0	0	0	0	0	0		1	3	1	2	2	1
475	AC190788.2_FG005	0	0	0	0	0	0	0		0	0	0	0	0	0	0	0	0	4	0	0	0	0	0	0		3	0	0	1	0	0	0	0	1	0	0	0	0	0	0	0		5	8	12	5	2	5
476	AC190789.3_FG005	0	0	0	0	0	0	0		0	0	0	0	0	0	0	0	0	0	0	0	0	0	0	0		0	0	0	0	0	0	0	0	0	0	0	0	0	0	0	0		0	0	0	0	1	0
477	AC190792.2_FG006	1	1	0	0	0	0	0		0	0	0	0	0	0	0	0	0	0	0	0	0	0	0	0		0	0	0	0	0	0	0	0	0	0	0	0	0	0	0	0		34	0	17	15	23	0
478	AC190799.2_FG010	0	0	0	0	0	0	0		0	0	0	0	0	0	0	0	0	0	0	0	0	0	0	0		0	0	0	0	0	0	0	0	0	0	0	0	0	0	0	0		0	0	1	0	0	0
479	AC190807.2_FG001	0	0	0	0	0	0	0		0	0	0	0	0	0	0	0	0	0	0	0	0	0	0	0		0	0	0	0	0	0	0	0	0	0	0	0	0	0	0	0		0	0	0	0	0	0
480	AC190809.2_FG002	0	0	0	0	0	0	0		0	0	0	0	0	0	0	0	0	0	0	0	0	0	0	0		0	0	0	0	0	0	0	0	0	0	0	0	0	0	0	0		2	0	0	0	0	0
481	AC190811.1_FG003	0	0	0	0	0	0	0		0	0	0	0	0	0	0	0	0	0	0	0	0	0	0	0		0	0	0	0	0	0	0	0	0	0	0	0	0	0	0	0		0	2	1	2	0	1
482	AC190812.3_FG006	0	0	0	0	0	0	0		0	0	0	0	0	0	0	0	0	0	0	0	0	0	0	0		0	0	0	0	0	0	0	0	0	0	0	0	0	0	0	0		0	1	0	1	1	2
483	AC190816.3_FG007	0	0	0	0	0	0	0		0	0	0	0	0	0	0	0	0	0	0	0	0	0	0	0		0	0	0	0	0	0	0	0	0	0	0	0	0	0	0	0		0	0	0	0	1	0
484	AC190832.2_FG003	0	0	0	0	0	0	0		0	0	0	0	0	0	0	0	0	0	0	0	0	0	0	0		0	0	0	0	0	0	0	0	0	0	0	0	0	0	0	0		1	0	0	0	2	0
485	AC190832.2_FG006	0	0	0	0	0	0	0		0	0	0	0	0	0	0	0	0	0	0	0	0	0	0	0		0	0	0	0	0	0	0	0	0	0	0	0	0	0	0	0		1	0	0	0	1	1
486	AC190834.3_FG005	0	0	0	0	0	0	0		0	0	0	0	0	0	0	0	0	0	0	0	0	0	0	0		0	0	0	0	0	0	0	0	0	0	0	0	0	0	0	0		1	4	0	2	0	0
487	AC190841.2_FG007	0	0	0	0	0	0	0		0	0	1	0	3	0	1	0	0	1	0	0	0	2	0	2		0	0	0	0	0	2	1	5	0	0	0	2	2	0	0	2		6	5	4	7	5	2
488	AC190851.3_FG003	0	0	0	0	0	0	0		0	0	0	0	0	0	0	0	0	0	0	0	0	0	0	0		0	0	0	0	0	0	0	0	0	0	0	0	0	0	0	0		0	0	0	0	0	3
489	AC190858.3_FG004	0	0	0	0	0	0	0		0	0	0	0	0	0	0	0	0	0	0	0	0	0	0	0		0	0	0	0	0	0	0	0	0	0	0	0	0	0	0	0		0	0	0	0	0	0
490	AC190858.3_FG005	0	0	0	0	0	0	0		0	0	0	0	0	0	0	0	0	0	0	0	0	0	0	0		0	0	0	0	0	0	0	0	0	0	0	0	0	0	0	0		0	0	0	0	0	0
491	AC190882.3_FG003	0	0	0	0	0	0	0		0	0	0	0	0	0	0	0	0	0	0	0	0	0	0	0		0	0	0	0	0	0	0	0	0	0	0	0	0	0	0	0		10	16	14	5	5	8
492	AC190883.2_FG005	0	0	0	0	0	0	0		0	0	0	0	0	0	0	0	0	0	0	0	0	0	0	0		0	0	0	0	0	0	0	0	0	0	0	0	0	0	0	1		0	5	3	3	1	1
493	AC190885.4_FG006	0	0	0	0	0	0	0		2	0	1	0	3	0	2	0	0	0	0	0	0	0	0	0		0	0	0	0	0	0	0	0	0	0	0	0	0	0	0	0		32	2	4	5	24	3
494	AC190909.3_FG004	0	0	0	0	0	0	0		0	0	0	0	0	0	0	0	0	0	0	0	0	0	0	0		1	0	0	0	0	0	0	0	0	0	0	0	0	0	0	0		355	354	342	429	358	337
495	AC190913.3_FG002	0	0	0	0	0	0	0		0	0	0	0	0	0	0	0	0	0	0	0	0	0	0	0		0	0	0	0	0	0	0	0	0	0	0	0	0	0	0	0		1	0	0	0	0	0
496	AC190915.3_FG007	0	0	0	0	0	0	0		0	0	0	0	0	0	0	0	0	0	0	0	0	0	0	0		0	0	0	0	0	0	0	0	0	0	0	0	0	0	0	0		0	0	0	0	0	0
497	AC190922.3_FG007	0	0	0	0	0	0	0		0	0	0	0	0	0	0	0	0	0	0	0	0	0	0	0		0	0	0	0	0	0	0	0	0	0	0	0	0	0	0	0		8	6	1	8	4	12
498	AC190925.2_FG002	0	0	0	0	0	0	0		0	0	0	0	0	0	0	0	0	0	0	0	0	0	0	0		0	0	0	0	0	0	0	0	0	0	0	0	0	0	0	0		10	13	23	17	8	12
499	AC190932.3_FG008	0	0	0	0	0	0	0		0	0	0	0	0	0	0	0	0	0	0	0	0	0	0	0		0	0	0	0	0	0	0	0	0	0	0	0	0	0	0	0		0	0	0	0	0	0
500	AC190933.3_FG004	0	0	0	0	1	1	1		30	0	15	0	27	0	36	0	0	2	0	6	1	6	0	7		13	3	9	4	18	5	21	1	5	2	7	1	7	3	9	1		76	13	47	23	39	14
501	AC190934.3_FG003	0	0	0	0	0	0	0		0	0	0	0	0	0	0	0	0	0	0	0	0	0	0	0		0	0	0	0	0	0	0	0	0	0	0	0	0	0	0	0		0	0	0	0	0	2
502	AC190978.3_FG007	0	0	0	0	0	0	0		0	0	0	0	0	0	0	0	0	0	0	0	0	0	0	0		0	0	0	0	0	0	0	0	0	0	0	0	0	0	0	0		0	1	0	0	0	0
503	AC190985.3_FG006	0	0	0	0	0	0	0		0	0	0	0	0	0	0	0	0	0	0	0	0	0	0	0		0	0	0	0	0	0	0	0	0	0	0	0	0	0	0	0		26	19	23	33	21	16
504	AC190990.2_FG005	0	0	0	0	0	0	0		0	0	0	0	0	0	0	0	0	0	0	0	0	0	0	0		0	0	0	0	0	0	0	0	0	0	0	0	0	0	0	0		0	0	0	0	0	0
505	AC190999.2_FG004	0	0	0	0	0	0	0		0	0	0	0	0	0	0	0	0	0	0	0	0	0	0	0		0	0	0	0	0	0	0	0	0	0	0	0	0	0	0	0		296	296	278	390	304	324
506	AC191009.3_FG004	0	0	0	0	1	1	1		42	0	46	1	11	0	8	0	1	53	2	54	0	25	2	29		27	22	48	30	7	4	7	6	37	50	30	45	13	6	5	12		304	337	358	377	293	298
507	AC191012.2_FG001	0	0	0	0	0	0	0		0	0	0	0	0	0	0	0	0	0	0	0	0	0	0	0		0	0	0	0	0	0	0	0	0	0	0	0	0	0	0	0		5	10	4	5	6	5
508	AC191040.2_FG002	0	0	0	0	0	0	0		0	0	0	0	0	0	0	0	0	0	0	0	0	0	0	0		0	0	0	0	0	0	0	0	0	0	0	0	0	0	0	0		3	3	2	4	0	5
509	AC191042.4_FG001	0	0	0	0	0	0	0		0	0	0	0	0	0	0	0	0	0	0	0	0	0	0	0		0	0	0	0	0	0	0	0	0	0	0	0	0	0	0	0		1	4	4	5	1	3
510	AC191048.2_FG006	0	0	0	0	0	0	0		0	0	0	0	0	0	0	0	0	0	0	0	0	0	0	0		0	0	0	0	0	0	0	0	0	0	0	0	0	0	0	0		53	15	30	32	29	15
511	AC191049.3_FG007	0	0	0	0	0	0	0		0	0	0	0	0	0	0	0	0	0	0	0	0	0	0	0		0	0	0	0	0	0	0	0	0	0	0	0	0	0	0	0		0	1	0	0	1	0
512	AC191050.3_FG003	0	0	0	0	0	0	0		0	0	0	0	0	0	0	0	1	0	0	0	0	0	0	0		0	1	0	0	1	0	0	0	0	1	1	0	0	0	0	1		2	4	6	7	1	4
513	AC191064.3_FG007	0	0	0	0	0	0	0		0	0	0	0	0	0	0	0	0	0	0	0	0	0	0	0		0	0	0	0	0	0	0	0	0	0	0	0	0	0	0	0		1	0	1	0	0	0
514	AC191067.3_FG005	0	0	0	0	0	0	0		0	0	0	0	0	0	0	0	0	0	1	0	0	0	0	0		0	0	0	0	0	0	0	0	0	0	0	0	0	0	0	0		0	0	0	0	0	1
515	AC191069.3_FG004	0	0	0	0	1	1	1		18	0	33	1	23	0	26	0	0	20	1	15	0	44	0	37		12	17	5	5	17	24	15	26	9	26	11	8	9	20	19	29		152	170	191	198	177	143
516	AC191069.3_FG007	0	0	0	0	0	0	0		0	0	0	0	0	0	0	0	0	0	0	0	0	0	0	0		0	0	0	0	0	0	0	0	0	0	0	0	0	0	0	0		0	0	0	0	0	0
517	AC191070.3_FG006	0	0	0	0	0	0	0		0	0	0	0	0	0	0	0	0	0	0	0	0	0	0	0		0	0	0	0	0	0	0	0	0	0	0	0	0	0	0	0		2	3	0	0	0	1
518	AC191071.3_FG001	0	0	0	0	0	0	0		0	0	0	0	0	0	0	0	1	0	0	0	0	0	0	0		0	0	0	0	0	0	1	0	0	0	0	0	0	0	0	0		1	1	2	0	2	0
519	AC191073.2_FG001	0	0	0	0	0	0	0		0	0	0	0	0	0	0	0	0	0	0	0	0	0	0	0		0	0	0	0	0	0	0	0	0	0	0	0	0	0	0	0		0	0	0	0	0	0
520	AC191073.2_FG003	0	0	0	0	0	0	0		0	0	0	0	0	0	0	0	0	0	0	0	0	0	0	0		0	0	0	0	0	0	0	0	0	0	0	0	0	0	0	0		1	2	3	0	1	6
521	AC191097.3_FG007	0	0	0	0	0	0	0		0	0	1	0	0	0	0	0	0	0	0	0	0	1	0	0		0	0	0	0	1	0	0	0	0	1	0	0	0	2	0	1		8	4	8	7	4	3
522	AC191098.3_FG002	0	0	0	0	0	0	0		0	0	0	0	0	0	0	0	0	0	0	0	0	0	0	0		0	0	0	0	0	0	0	0	0	0	0	0	0	0	0	0		0	0	0	0	0	0
523	AC191107.4_FG001	0	0	0	0	0	0	0		0	0	0	0	0	0	0	0	0	0	0	0	0	0	0	0		0	0	0	0	0	0	0	0	0	0	0	0	0	0	0	0		0	0	0	0	0	0
524	AC191107.4_FG002	0	0	0	0	0	0	0		0	0	0	0	0	0	0	0	0	0	0	0	0	0	0	0		0	0	0	0	0	0	0	0	0	0	0	0	0	0	0	0		0	2	0	0	0	1
525	AC191113.2_FG002	0	0	0	0	0	1	0		206	1	170	0	167	0	172	1	1	141	0	130	1	139	1	132		123	108	93	88	127	107	93	83	98	83	112	84	121	91	99	77		1360	1128	1342	1359	1184	1066
526	AC191115.3_FG002	0	0	0	0	0	0	0		0	0	0	0	1	0	0	0	0	0	0	0	0	0	0	0		0	0	1	0	0	0	0	0	1	0	0	0	0	0	0	0		4	8	1	6	3	8
527	AC191147.3_FG002	0	0	0	0	0	0	0		0	0	0	0	0	0	0	0	0	0	0	0	0	0	0	0		0	0	0	0	0	0	0	0	0	0	0	0	0	0	0	0		0	0	0	0	0	0
528	AC191246.3_FG004	0	0	0	0	0	0	0		0	0	0	0	0	0	0	0	0	0	0	0	0	0	0	0		0	0	0	0	0	0	0	0	0	0	0	0	0	0	0	0		0	2	1	1	0	0
529	AC191246.3_FG006	0	0	0	0	0	0	0		5	0	7	0	6	0	7	0	0	15	0	3	0	12	0	7		2	2	6	3	4	3	5	5	7	9	4	6	8	4	5	5		77	83	40	91	55	71
530	AC191251.3_FG005	0	0	0	0	1	0	0		5	1	4	0	10	0	12	0	0	5	0	2	1	2	0	10		9	2	6	4	4	4	6	1	4	3	2	1	6	4	6	2		61	60	64	80	49	54
531	AC191253.3_FG004	0	0	0	0	0	0	0		0	0	0	0	0	0	0	0	0	0	0	0	0	0	0	0		0	0	0	0	0	0	0	0	0	0	0	0	0	0	0	0		1	1	0	0	2	0
532	AC191254.3_FG001	0	0	0	0	0	0	0		0	0	0	0	0	0	0	0	0	2	0	0	0	0	0	0		0	1	0	1	0	0	0	2	0	0	0	0	0	0	0	1		3	35	29	16	2	30
533	AC191264.3_FG002	0	0	1	0	0	0	0		0	0	0	0	0	0	0	0	0	0	0	0	0	0	0	0		0	0	0	0	0	1	0	0	0	0	0	0	0	0	0	0		1	2	2	4	0	2
534	AC191264.3_FG003	0	0	0	0	0	0	0		0	0	0	0	0	0	0	0	0	0	0	0	0	0	0	0		0	0	0	0	0	0	0	0	0	0	0	0	0	0	0	0		0	0	0	0	0	0
535	AC191279.2_FG001	0	0	0	0	0	0	0		0	0	0	0	0	0	0	0	0	0	0	0	0	0	0	0		0	0	0	0	0	0	0	0	0	0	0	0	0	0	0	0		0	0	0	0	0	0
536	AC191279.2_FG003	0	0	0	0	0	0	0		0	0	0	0	0	0	0	0	0	0	0	0	0	0	0	0		0	0	0	0	0	0	0	0	0	0	0	0	0	0	0	0		0	0	0	0	0	0
537	AC191283.3_FG004	0	0	0	0	0	0	0		1	0	0	0	2	0	0	0	0	0	0	1	0	0	0	0		2	0	0	1	1	0	1	0	0	0	0	2	0	1	0	0		247	209	213	260	228	198
538	AC191297.3_FG004	0	0	0	0	0	0	0		0	0	0	0	0	0	0	0	0	0	0	0	0	0	0	0		0	0	0	0	0	0	0	0	0	0	0	0	0	0	0	0		0	0	0	0	0	0
539	AC191305.3_FG002	0	0	0	0	0	0	0		0	0	0	0	0	0	0	0	0	0	0	0	0	0	0	0		0	0	0	0	0	0	0	0	0	0	0	0	0	0	0	0		0	0	0	0	0	0
540	AC191317.3_FG009	0	0	0	0	0	0	0		0	0	0	0	1	0	0	0	0	0	0	0	0	0	0	0		0	0	0	0	0	0	0	0	0	0	0	0	0	0	0	0		3	0	2	0	0	0
541	AC191328.3_FG002	0	0	0	0	0	0	0		0	0	0	0	0	0	0	0	0	0	0	0	0	0	0	0		1	0	0	0	0	0	0	0	0	0	0	0	0	0	0	0		0	0	1	0	0	0
542	AC191330.3_FG001	0	0	0	0	0	0	0		0	0	0	0	0	0	0	0	0	0	0	0	0	0	0	0		0	0	0	0	0	0	0	0	0	0	0	0	0	0	0	0		0	0	0	0	0	0
543	AC191338.3_FG002	0	0	0	0	0	0	0		0	0	0	0	0	0	0	0	0	0	0	0	0	0	0	0		0	0	0	0	0	0	0	0	0	0	0	0	0	0	0	0		1	2	1	4	2	3
544	AC191360.3_FG004	0	0	0	0	0	0	0		5	1	3	0	5	0	2	0	0	7	0	4	0	5	0	5		3	5	1	2	2	4	1	4	2	2	1	3	1	4	0	0		7	9	10	5	3	6
545	AC191360.3_FG015	0	0	0	0	0	0	0		0	0	0	0	0	0	0	0	0	0	0	0	0	0	0	0		1	0	0	0	0	0	1	0	0	0	0	0	0	0	0	0		2	5	9	6	0	5
546	AC191361.4_FG006	0	0	0	0	0	0	0		0	0	0	0	0	0	0	0	0	0	0	0	0	0	0	0		0	0	0	0	0	0	0	0	0	0	0	0	0	0	0	0		0	1	0	1	1	0
547	AC191362.3_FG002	0	0	0	0	0	0	0		0	0	0	0	0	0	0	0	0	0	0	0	0	0	0	0		0	0	0	0	0	0	0	0	0	0	0	0	0	0	0	0		0	0	0	0	0	0
548	AC191380.3_FG001	0	0	0	0	0	0	0		0	0	0	0	0	0	0	0	0	0	0	0	0	0	0	0		0	0	0	0	1	0	0	0	0	0	0	0	0	0	0	0		0	0	0	0	0	0
549	AC191401.3_FG009	0	0	0	0	0	0	0		0	0	0	0	0	0	0	0	0	0	0	0	0	0	0	0		0	0	0	0	0	0	0	0	0	0	0	0	0	0	0	0		0	0	1	0	0	0
550	AC191401.3_FG013	0	0	0	0	0	0	0		1	0	0	0	0	0	0	0	0	0	0	0	0	0	0	0		0	0	0	0	0	0	0	0	0	0	0	0	0	0	0	0		1	1	0	2	0	2
551	AC191410.4_FG004	0	0	0	0	0	0	0		0	0	0	0	0	0	0	0	0	0	0	0	0	0	0	0		0	0	0	0	0	0	0	0	0	0	0	0	0	0	0	0		5	2	3	3	3	2
552	AC191412.3_FG005	0	0	0	0	0	0	0		0	0	0	0	0	0	0	0	0	1	0	0	0	0	0	0		0	0	0	0	0	0	0	0	0	0	0	0	0	0	0	0		0	1	1	0	1	1
553	AC191418.3_FG003	0	0	0	0	0	0	0		0	0	0	0	0	0	0	0	0	0	0	0	0	0	0	0		0	0	0	0	0	0	0	0	0	0	0	0	0	0	0	0		0	0	1	0	0	0
554	AC191421.3_FG001	0	0	0	0	0	0	0		0	0	0	0	0	0	0	0	0	0	0	0	0	0	0	0		0	0	0	0	0	0	0	0	0	0	0	0	0	0	0	0		0	0	0	0	0	0
555	AC191523.3_FG001	0	0	0	0	0	0	0		0	0	0	0	0	0	0	0	1	0	0	0	0	0	0	0		0	0	0	0	1	0	0	0	0	0	0	0	0	0	0	0		0	1	0	0	0	0
556	AC191526.3_FG001	0	0	0	0	0	0	0		0	0	0	0	0	0	0	0	0	0	0	0	0	0	0	0		0	0	0	0	0	0	0	0	0	0	0	0	0	0	0	0		1	2	3	2	2	1
557	AC191526.3_FG004	0	0	0	0	0	0	0		0	0	0	0	0	0	0	0	0	0	0	0	0	0	0	0		0	0	0	0	0	0	0	0	0	0	0	0	0	0	0	0		2	0	0	0	1	0
558	AC191534.3_FG003	0	0	0	0	0	0	0		0	0	0	0	0	0	0	0	0	0	0	0	0	0	0	0		0	0	0	0	0	0	0	0	0	0	1	0	0	0	0	0		3	3	5	2	1	5
559	AC191539.4_FG001	0	0	0	0	0	0	0		0	0	0	0	0	0	0	0	0	0	0	0	0	0	0	0		0	0	0	0	0	0	0	0	0	0	0	0	0	0	0	0		1	3	3	2	3	2
560	AC191541.4_FG005	0	0	0	0	0	0	0		0	0	0	0	0	0	0	0	0	0	0	0	0	0	0	0		0	0	0	0	0	0	0	0	0	0	0	0	0	0	0	0		4	3	4	2	0	0
561	AC191548.3_FG005	0	0	0	0	0	0	0		1	0	0	0	0	0	0	0	0	0	0	0	0	0	0	0		0	0	0	0	0	0	0	0	0	0	0	0	0	0	0	0		5	0	1	0	2	0
562	AC191551.3_FG003	0	0	0	0	0	0	0		0	0	1	0	0	0	0	0	0	0	0	0	0	0	0	0		0	0	0	0	0	0	1	0	0	0	0	0	1	0	0	0		1	7	1	3	3	5
563	AC191562.3_FG008	0	0	0	0	0	0	0		0	0	0	0	0	0	0	0	1	0	0	0	0	0	0	0		0	0	0	0	0	0	0	0	0	0	0	0	0	0	0	0		0	1	0	0	0	0
564	AC191564.3_FG003	0	0	0	0	0	0	0		0	0	0	0	0	0	0	0	0	0	0	0	0	0	0	0		0	0	0	0	0	0	0	0	0	0	0	0	0	0	0	0		0	2	0	0	0	0
565	AC191568.3_FG010	0	0	0	0	0	0	0		0	0	0	0	0	0	0	0	0	0	0	0	0	0	0	0		0	0	0	0	0	0	0	0	0	0	0	0	0	0	0	0		1	1	0	1	0	0
566	AC191575.2_FG001	0	0	0	0	0	0	0		0	0	0	0	0	0	0	0	0	2	0	4	0	4	0	32		0	1	0	1	0	3	3	0	0	2	1	0	0	1	1	2		3	32	7	17	2	51
567	AC191577.3_FG004	0	0	0	0	0	0	0		0	0	0	0	0	0	0	0	0	0	0	0	0	0	0	0		0	0	0	0	0	0	0	0	0	0	0	0	0	0	0	0		1	1	1	0	0	0
568	AC191578.3_FG003	0	0	0	0	0	0	0		0	0	0	0	0	0	0	0	0	0	0	0	0	0	0	0		0	0	0	0	0	0	0	0	0	0	0	0	0	0	0	0		0	1	0	0	0	0
569	AC191589.3_FG003	0	0	0	0	0	0	0		0	0	0	0	0	0	0	0	0	0	0	0	0	0	0	0		0	0	0	0	0	0	0	0	0	0	0	0	0	0	0	0		0	0	0	0	0	0
570	AC191598.3_FG007	0	0	0	0	1	1	1		1	0	2	0	2	0	3	0	0	7	0	3	0	2	0	7		0	4	0	4	2	3	2	2	1	3	0	2	0	3	0	2		5	34	18	17	7	35
571	AC191601.1_FG003	1	1	0	0	0	0	0		0	0	0	0	2	0	0	0	0	0	0	0	0	0	0	0		0	0	1	0	0	0	1	0	2	0	1	0	1	0	0	0		12	0	2	6	14	0
572	AC191622.3_FG003	0	0	0	0	0	0	0		0	0	0	0	0	0	0	0	0	0	0	1	0	0	0	0		0	0	0	0	0	0	0	0	0	0	0	0	0	0	0	0		1	0	0	0	0	1
573	AC191622.3_FG005	0	0	0	0	0	0	0		0	0	0	0	0	0	0	0	0	0	0	0	0	0	0	0		0	0	0	0	0	0	0	0	0	0	0	0	0	0	0	0		0	0	0	0	0	0
574	AC191650.3_FG003	0	0	0	0	0	0	0		0	0	0	0	0	0	0	0	0	0	0	0	0	0	0	0		0	0	0	0	0	0	0	0	0	0	0	0	0	0	0	0		0	0	0	0	0	0
575	AC191654.3_FG004	0	0	1	0	0	0	0		0	0	0	0	0	0	0	0	0	1	0	0	0	1	0	1		0	1	0	0	0	0	0	0	0	1	0	2	0	0	0	2		0	4	3	3	0	3
576	AC191676.3_FG011	0	0	0	1	0	0	0		34	0	43	1	42	0	31	0	1	20	0	19	0	13	0	19		17	13	11	15	19	24	11	14	14	13	14	21	10	14	12	14		87	59	65	71	87	49
577	AC191686.3_FG002	0	0	0	0	0	0	0		1	0	0	0	0	0	0	0	0	0	0	0	0	0	0	0		0	0	1	0	0	0	0	0	1	0	0	0	0	0	0	0		3	1	2	1	2	0
578	AC191691.3_FG011	0	0	0	0	0	0	0		0	0	0	0	0	0	0	0	0	0	0	0	0	0	0	0		0	0	0	0	0	0	0	0	0	0	0	0	0	0	0	0		0	0	0	0	0	0
579	AC191692.3_FG001	0	0	0	0	0	0	0		0	0	0	0	0	0	0	0	0	0	0	0	0	0	0	0		0	0	0	0	0	0	0	0	0	0	0	0	0	0	0	0		0	1	0	0	1	1
580	AC191704.3_FG007	0	0	0	0	0	0	0		0	0	0	0	0	0	0	0	0	0	0	0	0	0	0	0		0	0	0	0	0	0	0	0	0	0	0	0	0	0	0	0		0	0	0	0	0	0
581	AC191708.3_FG001	0	0	0	0	0	0	0		0	0	0	0	0	0	0	0	0	0	0	0	0	0	0	0		0	0	0	0	0	0	0	0	0	0	0	0	0	0	0	0		1	0	0	0	0	0
582	AC191708.3_FG002	0	0	0	0	0	0	0		0	0	0	0	0	0	0	0	0	0	0	0	0	0	0	0		0	0	0	0	0	0	0	0	0	0	0	0	0	0	0	0		0	0	0	0	0	0
583	AC191731.3_FG001	0	0	0	0	0	0	0		0	0	0	0	0	0	0	0	0	0	0	0	0	0	0	0		0	0	0	0	0	0	0	0	0	0	0	0	0	0	0	0		0	0	0	2	0	1
584	AC191735.3_FG009	0	0	0	0	0	0	0		0	0	0	0	0	0	1	0	0	0	0	0	0	0	1	0		0	0	0	0	0	0	0	0	0	0	0	0	0	0	0	0		0	0	0	0	0	0
585	AC191748.3_FG001	0	0	0	0	0	0	0		0	0	0	0	0	0	0	0	0	1	0	1	1	0	0	0		0	0	0	0	0	0	0	0	0	0	0	0	0	0	0	0		1	2	3	2	1	3
586	AC191771.3_FG008	0	0	0	0	0	0	0		6	0	11	0	6	0	4	0	0	10	0	7	0	11	0	11		4	2	6	1	4	6	5	5	4	5	3	4	6	12	6	4		98	119	97	134	102	97
587	AC191778.3_FG001	0	0	0	0	0	0	0		0	0	0	0	0	0	0	0	0	0	0	0	0	0	0	1		0	0	0	0	0	0	0	0	0	0	0	1	0	0	0	0		7	3	4	0	3	3
588	AC191782.3_FG001	0	0	0	0	0	0	0		0	0	0	0	0	0	0	0	0	0	0	0	0	0	0	0		0	0	0	0	0	0	0	0	0	0	0	0	0	0	0	0		0	1	0	1	2	1
589	AC191790.3_FG005	0	0	0	0	0	0	0		0	0	0	0	0	0	0	0	0	0	0	0	0	0	0	0		0	0	0	0	0	0	0	0	0	0	0	0	0	0	0	0		0	0	0	0	0	0
590	AC191804.4_FG002	0	0	0	0	0	0	0		0	0	0	0	0	0	0	0	0	0	0	0	0	0	0	0		0	0	0	0	0	0	0	0	0	0	0	0	0	0	0	0		4	2	0	0	3	2
591	AC191927.2_FG002	0	0	0	0	0	0	0		0	0	0	0	0	0	0	0	0	0	0	0	0	0	0	0		0	0	0	0	0	0	0	0	0	0	0	0	0	0	0	0		2	1	0	0	2	1
592	AC191961.3_FG009	0	0	0	0	0	0	0		0	0	0	0	0	0	0	0	0	0	0	0	0	0	0	0		0	0	0	0	0	0	0	0	0	0	0	0	0	0	0	0		1	2	0	4	1	0
593	AC192175.3_FG001	0	0	0	0	0	0	0		0	0	0	0	0	0	0	0	0	0	0	0	0	0	0	0		0	0	0	0	0	0	0	0	0	0	0	0	0	0	0	0		0	0	0	0	0	0
594	AC192177.3_FG008	0	0	0	0	0	0	0		0	0	0	0	0	0	0	0	0	0	0	0	0	2	0	0		0	1	0	0	0	0	0	0	0	0	0	0	0	0	0	0		1	3	2	1	1	1
595	AC192204.3_FG005	0	0	0	0	0	0	0		0	0	0	0	0	0	0	0	0	0	0	0	0	0	0	0		0	0	0	0	0	0	0	0	0	0	0	0	0	0	0	0		0	2	0	0	0	0
596	AC192240.3_FG005	0	0	0	0	0	0	0		0	0	0	0	0	0	0	0	0	0	0	0	0	0	0	0		0	0	0	0	0	0	0	0	0	0	0	0	0	0	0	0		0	0	1	2	0	0
597	AC192244.3_FG001	0	0	0	0	1	1	1		46	0	49	0	73	0	95	0	1	10	0	24	1	56	0	47		26	20	18	9	46	27	61	43	36	24	25	19	35	27	45	30		540	351	607	498	430	353
598	AC192244.3_FG007	0	0	0	0	0	1	0		147	1	156	2	175	2	214	0	1	109	2	100	1	131	0	149		69	72	83	82	103	103	95	94	118	83	84	80	126	105	133	113		477	441	511	613	434	387
599	AC192330.1_FG004	0	0	0	0	0	0	0		0	0	0	0	0	0	0	0	0	0	0	0	0	0	0	0		0	0	0	0	0	0	0	0	0	0	0	0	0	0	0	0		0	0	2	0	0	0
600	AC192356.3_FG003	0	0	1	0	0	0	0		0	0	0	0	0	0	0	0	0	0	0	0	0	0	0	0		0	0	0	0	0	0	0	0	0	0	0	0	0	0	0	0		0	19	13	8	1	17
601	AC192362.3_FG002	0	0	0	0	0	0	0		16	0	10	0	4	0	5	0	0	28	0	25	0	14	0	14		10	13	12	11	1	2	3	2	11	20	7	10	4	4	5	7		41	82	55	89	31	87
602	AC192362.3_FG003	0	0	0	0	1	1	1		31	2	38	1	15	0	5	0	1	72	2	71	1	31	0	36		16	29	25	41	4	13	4	5	24	63	34	40	5	8	8	12		89	224	143	206	94	218
603	AC192367.2_FG002	0	0	0	0	0	0	0		0	0	0	0	0	0	0	0	0	0	0	1	0	0	0	0		0	0	0	0	0	0	0	0	0	1	0	0	0	0	0	0		18	29	12	24	19	31
604	AC192368.3_FG009	0	0	0	0	0	0	0		0	0	0	0	0	0	0	0	0	0	0	0	0	0	0	0		0	0	0	0	0	0	0	0	0	0	0	0	0	0	0	0		1	0	0	0	0	0
605	AC192372.3_FG003	0	0	0	0	0	0	0		0	0	0	0	0	0	0	0	0	0	0	0	0	0	0	0		0	0	0	0	0	0	0	0	0	0	0	0	0	0	0	0		3	4	4	5	3	2
606	AC192381.3_FG004	0	0	0	0	0	0	0		0	0	0	0	0	0	0	0	0	0	0	0	0	0	0	0		0	0	0	0	0	0	0	0	0	0	0	0	0	0	0	0		0	0	0	1	0	2
607	AC192405.3_FG001	0	0	0	0	0	0	0		0	0	0	0	0	0	0	0	0	0	0	0	0	0	0	0		0	0	0	0	0	0	0	0	0	0	0	0	0	0	0	0		1	1	3	1	1	2
608	AC192451.3_FG001	0	0	0	0	0	0	0		130	0	113	0	146	2	136	0	2	178	0	167	0	187	1	172		64	71	91	102	89	94	86	109	73	86	62	66	78	89	88	81		596	904	700	715	521	799
609	AC192608.3_FG004	0	0	0	0	0	0	0		0	0	0	1	0	0	0	0	0	2	2	2	0	0	0	2		0	0	0	2	0	0	0	2	0	0	0	0	0	2	0	0		1	4	0	0	1	4
610	AC193318.3_FG006	0	0	0	0	0	0	0		0	0	0	0	0	0	0	0	0	0	0	0	0	0	0	0		0	0	0	0	0	0	0	0	0	0	0	0	0	0	0	0		0	2	0	0	0	2
611	AC193319.3_FG004	0	0	0	0	0	0	0		0	0	0	0	1	0	0	0	0	0	0	0	0	0	0	0		0	0	0	0	0	0	0	0	0	0	0	0	0	0	0	0		0	0	1	1	1	1
612	AC193324.3_FG002	0	0	0	0	0	0	0		1	0	0	0	0	0	0	0	0	0	0	0	0	0	0	0		0	0	0	0	0	0	1	0	0	1	2	0	0	0	0	0		18	83	53	67	31	103
613	AC193335.3_FG001	0	0	0	0	0	0	0		0	0	0	0	0	0	0	0	0	0	0	0	0	0	0	0		0	0	0	0	0	0	0	0	0	0	0	0	0	0	0	0		0	0	0	0	0	0
614	AC193353.3_FG002	0	0	0	0	0	0	0		0	0	0	0	0	0	0	0	0	0	0	0	0	0	0	0		0	0	0	0	0	0	0	0	0	0	0	0	0	0	0	0		0	1	0	0	0	0
615	AC193379.3_FG001	0	0	0	0	0	0	0		0	0	0	0	0	0	0	0	0	0	0	0	0	0	0	0		0	0	0	0	0	0	0	0	0	0	0	0	0	0	0	0		122	156	125	241	127	188
616	AC193402.3_FG004	1	1	0	0	0	0	0		0	0	0	0	1	0	1	0	0	0	0	0	0	0	0	0		0	0	0	0	0	0	0	0	0	0	1	0	0	0	0	0		5	0	1	1	5	0
617	AC193423.3_FG003	0	0	0	0	0	0	0		0	0	0	0	0	0	0	0	0	0	0	0	0	0	0	0		0	0	0	0	0	0	0	0	0	0	0	0	0	0	0	0		0	0	0	0	1	0
618	AC193430.3_FG008	0	0	0	0	0	0	0		0	0	0	0	0	0	0	0	0	0	0	0	0	0	0	0		0	0	0	0	0	0	0	0	0	0	0	0	0	0	0	0		0	4	4	1	1	0
619	AC193440.3_FG009	0	0	0	0	0	0	0		0	0	0	0	0	0	0	0	0	0	0	0	0	0	0	0		0	0	0	0	0	0	0	0	0	0	0	0	0	0	0	0		0	1	1	0	0	0
620	AC193464.3_FG001	0	0	0	0	0	0	0		0	0	0	0	0	0	0	0	0	0	0	0	0	0	0	0		0	0	0	0	0	0	0	0	0	0	0	0	0	0	0	0		1	0	1	1	0	0
621	AC193466.3_FG001	0	0	0	0	0	0	0		0	0	0	0	0	0	0	0	0	0	0	0	0	0	0	0		0	0	0	0	0	0	0	0	0	0	0	0	0	0	0	0		0	0	2	2	0	0
622	AC193479.2_FG002	0	0	0	0	0	0	0		0	0	0	0	0	0	0	0	0	0	0	0	0	0	0	0		0	0	0	0	0	0	0	0	0	0	0	0	0	0	0	0		2	2	0	0	1	0
623	AC193499.3_FG004	0	0	1	0	0	0	0		0	0	0	0	0	0	0	0	0	0	0	0	0	0	0	0		0	0	0	0	0	0	0	0	0	0	0	0	0	0	0	0		0	21	14	16	0	34
624	AC193499.3_FG007	0	0	0	0	0	0	0		0	0	0	0	1	0	0	0	0	0	0	0	0	0	0	0		0	0	0	0	0	0	0	0	0	0	0	0	0	0	0	0		1	0	0	1	2	1
625	AC193500.3_FG003	0	0	0	0	0	0	0		18	0	11	0	15	0	9	0	0	2	0	3	0	9	0	6		3	5	5	4	3	4	5	3	2	3	10	5	4	3	5	4		90	28	62	46	63	31
626	AC193502.3_FG004	0	0	0	0	0	0	0		0	0	0	0	0	0	0	0	0	0	0	0	0	0	0	0		0	0	0	0	0	0	0	0	0	0	0	0	0	0	0	0		1	6	3	1	1	5
627	AC193503.3_FG004	0	0	0	0	0	0	0		0	0	0	0	0	0	0	0	0	0	0	0	0	0	0	0		0	0	0	0	0	0	0	0	0	0	0	0	0	0	0	0		1	0	2	1	0	1
628	AC193576.3_FG003	0	0	0	0	0	0	0		0	0	0	0	0	0	0	0	0	0	0	0	0	0	0	0		0	0	0	0	0	0	0	0	0	0	0	0	0	0	0	0		0	1	0	0	0	0
629	AC193591.3_FG001	0	0	0	0	1	1	1		18	0	11	0	16	0	13	0	0	1	1	4	0	9	0	7		10	6	5	3	12	3	7	3	12	2	13	2	13	2	7	1		282	77	209	171	173	55
630	AC193592.3_FG001	0	0	0	0	0	0	0		0	0	0	0	0	0	0	0	0	0	0	0	0	0	0	0		3	0	0	0	0	0	0	0	0	0	1	0	0	0	0	0		3	5	5	2	4	3
631	AC193598.3_FG002	0	0	0	0	0	0	0		0	0	0	0	0	0	0	0	0	0	0	0	0	0	0	0		0	0	0	0	0	0	0	0	0	0	0	0	0	0	0	0		109	60	94	102	111	66
632	AC193606.2_FG001	0	0	0	0	0	0	0		0	0	0	0	0	0	0	0	0	0	0	0	0	0	0	0		0	0	0	0	0	0	0	0	0	0	0	0	0	0	0	0		0	0	0	0	0	0
633	AC193606.2_FG005	0	0	0	0	0	0	0		0	0	0	0	0	0	0	0	0	0	0	0	0	0	0	0		0	0	0	0	0	0	0	0	0	0	0	0	0	0	0	0		0	0	0	0	0	0
634	AC193625.3_FG008	0	0	0	0	0	0	0		0	0	0	0	0	0	0	0	0	0	0	0	0	0	0	0		0	0	0	0	0	0	0	0	0	0	0	0	0	0	0	0		0	1	1	0	1	0
635	AC193625.3_FG010	0	0	0	0	0	0	0		0	0	0	0	0	0	0	0	0	0	0	0	0	0	0	0		0	0	1	0	0	0	0	0	0	0	0	0	0	0	0	0		1	2	2	1	2	1
636	AC193630.3_FG003	0	0	0	0	0	0	0		0	0	0	0	0	0	0	0	0	0	0	0	0	0	0	0		0	0	0	0	0	0	0	0	0	0	0	0	0	0	0	0		1	11	2	5	1	0
637	AC193630.3_FG004	0	0	0	0	0	0	0		0	0	0	0	0	0	0	0	0	0	0	0	0	0	0	0		0	0	0	0	0	0	0	0	0	0	0	0	0	0	0	0		4	8	10	4	4	4
638	AC193632.2_FG002	0	0	0	0	0	0	0		0	0	1	0	0	0	2	0	0	0	0	1	0	0	0	0		0	0	0	0	0	1	1	0	0	0	0	0	0	0	0	1		72	94	50	65	51	63
639	AC193645.3_FG006	0	0	0	0	0	0	0		0	0	0	0	0	0	0	0	0	0	0	0	0	0	0	0		0	0	0	0	0	0	0	0	0	0	0	0	0	0	0	0		0	0	0	0	0	0
640	AC193646.3_FG002	0	0	0	0	0	0	0		0	0	0	0	0	0	0	0	0	0	0	0	0	0	0	0		0	0	0	0	0	0	0	0	0	0	0	0	0	0	0	0		8	8	7	3	8	4
641	AC193658.3_FG001	0	0	0	0	0	0	0		0	0	1	0	0	0	2	0	0	0	0	0	0	0	0	0		0	0	0	0	0	0	1	0	0	0	0	0	0	0	0	0		0	0	0	0	1	0
642	AC193668.3_FG009	0	0	0	0	0	0	0		0	0	0	0	0	0	0	0	0	0	0	0	0	0	0	0		0	0	0	0	0	0	0	0	0	0	0	0	0	0	0	0		1	1	1	2	0	3
643	AC193744.3_FG009	0	0	0	0	0	0	0		0	0	0	0	0	0	0	0	0	0	0	0	0	0	0	0		0	0	0	0	0	0	0	0	0	0	0	0	0	0	0	0		0	0	0	0	0	1
644	AC193745.3_FG002	0	0	0	0	0	0	0		0	0	0	0	0	0	0	0	1	0	0	0	0	1	0	0		0	1	0	0	1	0	0	0	0	0	0	0	0	0	0	0		5	6	5	3	3	3
645	AC193745.3_FG003	0	0	0	0	0	0	0		0	0	1	0	0	0	0	0	0	0	0	0	0	0	0	0		0	0	0	0	0	0	0	0	0	0	0	0	0	0	0	0		0	2	5	4	2	1
646	AC193754.3_FG005	0	0	0	0	0	0	0		0	0	0	0	0	0	0	0	0	0	0	1	0	0	0	1		0	0	0	0	0	1	0	0	0	0	0	1	0	2	0	1		1	1	2	3	1	1
647	AC193754.3_FG008	0	0	0	0	0	0	0		0	0	0	0	0	0	0	0	0	0	0	0	0	0	0	0		0	0	0	0	0	0	0	0	0	0	0	0	0	0	0	0		52	47	57	76	64	58
648	AC193756.3_FG001	0	0	0	0	0	0	0		0	0	0	0	0	0	0	0	0	0	0	0	0	0	0	0		0	0	0	0	0	0	0	0	0	0	0	0	0	0	0	0		0	0	0	0	0	0
649	AC193767.3_FG003	0	0	0	0	0	0	0		0	0	0	0	0	0	0	0	0	0	0	0	0	0	0	0		0	0	0	0	0	0	0	0	0	0	0	0	0	0	0	0		1	0	2	2	2	2
650	AC193786.3_FG005	0	0	0	0	0	0	0		0	0	0	0	0	0	0	0	0	0	0	0	0	0	0	0		0	0	0	0	0	0	0	0	0	0	0	0	0	0	0	0		3	4	1	2	6	0
651	AC193787.3_FG008	0	0	0	0	0	0	0		0	0	0	0	0	0	0	0	0	0	0	0	0	0	0	0		0	0	0	0	0	0	0	0	0	0	0	0	0	0	0	0		1	2	3	2	2	5
652	AC194005.3_FG004	0	0	0	0	0	0	0		2	0	1	0	7	0	4	0	0	0	0	0	0	0	0	0		1	0	1	0	0	0	2	0	1	0	0	0	3	0	3	0		30	2	17	16	31	2
653	AC194008.3_FG007	0	0	0	0	0	0	0		0	0	0	0	0	0	0	0	0	0	0	0	0	0	0	0		0	0	0	0	0	0	0	0	0	0	0	0	0	0	0	0		1	1	4	2	0	1
654	AC194016.3_FG001	0	0	0	0	0	0	0		0	0	0	0	0	0	0	0	0	0	0	0	0	0	0	0		0	0	0	0	0	0	0	0	0	0	0	0	0	0	0	0		0	0	0	0	0	0
655	AC194022.3_FG013	0	0	0	0	1	0	0		22	0	11	0	15	0	26	0	0	12	0	10	0	24	0	14		14	15	1	3	9	17	7	19	8	3	4	11	5	10	11	11		49	31	62	45	30	29
656	AC194022.3_FG014	0	0	0	0	0	0	0		0	0	0	0	0	0	0	0	0	0	0	0	0	0	0	0		0	0	0	0	0	0	0	0	0	1	0	0	0	0	0	0		0	1	0	1	0	0
657	AC194031.3_FG002	0	0	0	0	0	0	0		0	0	0	0	0	0	0	0	0	0	0	0	0	0	0	0		0	0	0	0	0	0	0	0	0	0	0	0	0	0	0	0		0	0	0	0	0	0
658	AC194032.3_FG010	0	0	0	0	0	0	0		0	0	0	0	0	0	0	0	0	0	0	0	0	0	0	0		0	0	0	0	0	0	0	0	0	0	0	0	0	0	0	0		2	3	0	1	0	0
659	AC194039.4_FG009	0	0	0	0	0	0	0		0	0	0	0	0	0	0	0	0	0	0	0	0	0	0	0		0	0	0	0	0	0	0	0	0	0	0	0	0	0	0	0		0	0	0	0	0	0
660	AC194045.3_FG001	0	0	0	0	0	0	0		0	0	0	0	0	0	0	0	0	0	0	0	0	0	0	0		0	0	0	0	0	0	0	0	0	0	0	0	0	0	0	0		1	0	3	0	0	0
661	AC194047.3_FG006	0	0	1	0	0	0	0		0	0	0	0	0	0	0	0	0	0	0	0	0	0	0	0		0	0	0	0	0	0	0	0	0	0	0	0	0	0	0	0		0	6	4	1	0	6
662	AC194056.3_FG008	0	0	0	0	0	0	0		14	1	7	0	3	0	10	0	0	8	0	3	0	8	0	7		7	5	2	2	2	4	6	7	2	1	5	2	3	2	4	1		48	37	35	15	28	16
663	AC194072.3_FG005	0	0	0	0	1	1	1		0	0	0	0	0	0	0	0	0	7	0	7	0	7	0	7		0	4	0	6	1	1	0	1	0	6	0	6	0	1	0	1		2	15	17	20	1	27
664	AC194097.3_FG008	0	0	1	0	0	0	0		0	0	0	0	0	0	0	0	0	0	0	0	0	0	0	0		0	0	0	0	0	0	0	0	0	0	0	0	0	0	0	0		0	4	1	2	0	3
665	AC194097.3_FG009	0	0	0	0	0	0	0		0	0	0	0	0	0	0	0	0	0	0	0	0	0	0	0		0	0	0	0	0	0	0	0	0	0	0	0	0	0	0	0		0	3	0	3	1	5
666	AC194101.3_FG001	0	0	0	0	0	0	0		0	0	0	0	0	0	0	0	0	0	0	0	0	0	0	0		0	0	0	0	0	0	0	0	0	0	0	0	0	0	0	0		0	0	1	0	0	0
667	AC194103.3_FG006	0	0	0	0	0	0	0		0	0	0	0	0	0	0	0	0	0	0	0	0	0	0	0		0	0	0	0	0	0	0	0	0	0	0	0	0	0	0	0		1	1	0	2	1	0
668	AC194104.3_FG007	0	0	0	0	0	0	0		0	0	0	0	0	0	0	0	0	0	0	0	0	0	1	0		0	0	0	0	0	0	0	0	0	0	0	0	0	0	0	0		0	1	1	0	1	2
669	AC194104.3_FG010	0	0	0	0	0	0	0		0	0	0	0	0	0	0	0	0	0	0	0	0	0	0	0		0	0	0	0	0	0	0	0	0	0	0	0	0	0	0	0		0	0	0	0	0	0
670	AC194112.3_FG001	0	0	0	0	0	0	0		0	0	0	0	0	0	0	0	0	0	0	0	0	0	0	0		0	0	0	0	0	0	0	0	0	0	0	0	0	0	0	0		0	0	2	1	0	1
671	AC194133.3_FG004	0	0	0	0	0	0	0		0	0	0	0	0	0	0	0	0	0	0	0	0	0	0	0		0	0	0	0	0	0	0	0	0	0	0	0	0	0	0	0		0	2	1	0	0	1
672	AC194136.3_FG001	0	0	0	0	0	0	0		0	0	0	0	0	0	0	0	0	0	0	0	0	0	0	0		0	0	0	0	0	0	0	0	0	0	0	0	0	0	0	0		0	0	0	0	0	0
673	AC194157.3_FG001	0	0	0	0	0	0	0		0	0	0	0	0	0	0	0	0	0	0	0	0	0	0	0		0	0	0	0	0	0	0	0	0	0	0	0	0	0	0	0		1	0	0	0	0	0
674	AC194158.3_FG005	0	0	0	0	0	0	0		9	0	15	0	23	0	27	0	0	5	0	4	0	23	0	22		10	9	10	6	17	21	29	19	12	19	10	9	21	9	18	12		65	29	85	120	57	28
675	AC194163.3_FG001	0	0	0	0	0	0	0		0	0	0	0	0	0	0	0	0	0	0	0	0	0	0	0		0	0	0	0	0	0	0	0	0	0	0	0	0	0	0	0		0	0	0	0	0	0
676	AC194163.3_FG002	0	0	0	0	0	0	0		0	0	0	0	0	0	0	0	0	0	0	0	0	0	0	0		0	0	0	0	0	0	0	0	0	0	0	0	0	0	0	0		0	0	0	0	0	0
677	AC194163.3_FG003	0	0	0	0	0	0	0		0	0	0	0	0	0	0	0	0	0	0	0	0	0	0	0		0	0	0	0	0	0	0	0	0	0	0	0	0	0	0	0		3	2	1	0	1	2
678	AC194172.3_FG008	0	0	0	0	0	0	0		0	0	0	0	0	0	0	0	0	0	0	0	0	0	0	0		0	0	0	0	0	0	0	0	0	0	0	0	0	0	0	0		1	0	2	1	0	1
679	AC194174.3_FG003	0	0	0	0	0	0	0		0	0	0	0	0	0	0	0	0	0	0	0	0	0	0	0		0	0	0	0	0	0	0	0	0	0	0	0	0	0	0	0		0	2	0	1	4	1
680	AC194176.3_FG002	0	0	0	0	0	0	0		0	0	0	0	0	0	0	0	0	0	0	0	0	0	0	0		0	0	0	0	0	0	0	0	0	0	0	0	0	0	0	0		4	2	2	4	2	2
681	AC194180.3_FG004	0	0	0	0	0	0	0		0	0	0	0	0	0	0	0	0	0	0	0	0	0	0	0		0	0	0	0	0	0	0	0	0	0	0	0	0	0	0	0		0	0	0	0	0	0
682	AC194203.3_FG003	0	0	0	0	0	0	0		0	0	0	0	0	0	0	0	0	0	0	0	0	0	0	0		0	0	0	0	0	0	0	0	0	0	0	0	0	0	0	0		58	14	38	35	61	16
683	AC194206.3_FG005	0	0	0	0	0	0	0		0	0	0	0	0	0	0	0	0	0	0	0	0	0	0	0		0	0	0	0	0	0	0	0	0	0	0	0	0	0	0	0		1	2	2	2	1	3
684	AC194214.3_FG002	0	0	0	0	0	0	0		0	0	0	0	0	0	0	0	0	0	0	0	0	0	0	0		0	0	1	0	0	0	0	0	0	0	0	0	0	0	0	0		4	5	6	7	7	5
685	AC194219.3_FG002	0	0	0	0	0	0	0		0	0	0	0	0	0	0	0	0	0	0	0	0	0	0	0		0	0	0	0	0	0	0	0	0	0	0	0	0	0	0	0		2	3	0	0	1	2
686	AC194259.3_FG001	0	0	0	0	0	0	0		0	0	0	0	0	0	0	0	0	0	0	0	0	0	0	0		0	0	1	0	0	0	0	0	0	0	0	0	0	0	0	0		6	0	0	1	1	1
687	AC194264.3_FG006	0	0	0	0	0	0	0		0	0	1	0	0	0	0	0	0	0	1	0	0	0	0	0		0	0	0	0	0	0	0	0	0	0	0	0	0	0	0	0		77	126	74	112	86	128
688	AC194272.3_FG003	0	0	0	0	1	1	1		49	0	42	0	39	0	49	0	0	26	0	18	0	29	0	30		19	5	16	15	35	18	34	30	31	26	17	9	43	23	35	21		231	219	197	279	189	161
689	AC194273.3_FG006	0	0	0	0	0	0	0		0	0	0	0	0	0	0	0	0	0	0	0	0	0	0	0		0	0	0	0	0	0	0	0	0	0	0	0	0	0	0	0		0	0	0	0	0	0
690	AC194273.3_FG007	0	0	0	0	0	0	0		0	0	0	0	0	0	0	0	0	0	0	0	0	0	0	0		0	0	0	0	0	0	0	0	0	0	0	0	0	0	0	0		0	0	0	0	0	0
691	AC194298.3_FG005	0	0	0	0	1	1	1		5	1	6	0	6	0	10	0	0	1	0	5	0	9	1	19		2	7	0	5	3	14	8	10	0	2	3	3	1	8	3	5		66	56	64	56	44	68
692	AC194321.3_FG009	0	0	0	0	0	0	0		0	0	0	0	0	0	0	0	0	0	0	0	0	0	0	0		0	0	0	0	0	0	0	0	0	0	0	0	0	0	0	0		0	0	0	0	0	0
693	AC194325.3_FG006	0	0	0	0	0	0	0		0	0	0	0	0	0	0	0	0	0	0	0	0	1	0	0		0	0	0	0	0	0	0	0	0	0	0	0	0	0	0	0		0	2	2	4	3	0
694	AC194335.3_FG001	0	0	0	0	0	0	0		0	0	0	0	0	0	0	0	0	0	0	0	0	0	0	0		0	0	0	0	0	0	0	0	0	0	0	0	0	0	0	0		0	1	0	0	1	1
695	AC194338.3_FG008	0	0	0	0	0	0	0		0	0	0	0	0	0	0	0	0	0	0	0	0	0	0	0		0	0	0	0	0	0	0	0	0	0	0	0	0	0	0	0		1	2	1	0	1	0
696	AC194341.4_FG001	0	0	0	0	0	0	0		0	0	0	0	0	0	0	0	0	1	0	0	0	0	0	0		0	0	0	0	0	1	0	0	0	0	0	1	0	0	0	0		0	2	0	3	0	1
697	AC194341.4_FG002	0	0	0	0	0	0	0		0	0	0	0	0	0	0	0	0	0	0	0	0	0	0	0		0	0	0	0	0	0	0	0	0	0	0	0	0	0	0	0		763	592	725	576	596	460
698	AC194341.4_FG003	0	0	0	0	0	0	0		0	0	0	0	1	0	1	0	1	0	0	0	0	0	0	0		0	0	0	0	0	0	0	0	0	0	0	0	1	0	1	0		10	7	7	16	5	5
699	AC194341.4_FG004	0	0	0	0	1	1	1		7	0	11	0	14	0	11	0	0	11	0	4	0	6	0	12		4	1	4	1	9	2	4	5	8	3	6	1	9	5	10	5		50	48	42	53	51	27
700	AC194350.3_FG001	0	0	1	0	0	0	0		1	0	0	0	0	0	0	0	0	0	0	0	1	0	0	0		0	0	0	0	0	0	0	0	2	0	0	0	0	0	0	0		1	4	3	3	0	2
701	AC194355.3_FG002	0	0	0	0	0	0	0		0	0	0	0	0	0	0	0	1	0	0	0	0	0	0	1		0	0	2	1	0	0	0	0	0	0	0	0	0	0	1	0		2	7	2	2	0	3
702	AC194356.3_FG002	0	0	0	0	0	0	0		0	0	0	0	0	0	0	0	0	0	0	0	0	0	0	0		0	0	0	0	0	0	0	0	0	0	0	0	0	0	0	0		2	3	3	1	0	1
703	AC194357.3_FG003	0	0	0	0	0	0	0		0	0	0	0	0	0	0	0	0	0	0	0	0	0	0	0		0	0	0	0	0	0	0	0	0	0	0	0	0	0	0	0		0	0	0	0	0	0
704	AC194362.3_FG003	0	0	0	0	0	0	0		1	0	0	1	0	0	0	0	2	0	0	0	0	0	0	0		0	0	0	0	0	0	0	0	1	1	0	0	0	0	1	0		4	4	2	2	3	2
705	AC194380.3_FG008	0	0	0	0	0	0	0		0	0	0	0	0	0	0	0	0	0	0	0	0	0	0	0		0	0	0	0	0	0	0	0	0	0	0	0	0	0	0	0		0	1	2	0	1	2
706	AC194389.3_FG001	0	0	0	0	1	0	0		16	0	19	0	21	0	26	0	0	14	0	10	0	19	1	14		16	6	8	9	19	6	8	11	13	8	7	6	12	8	9	8		221	270	255	224	203	223
707	AC194402.2_FG003	0	0	0	0	0	0	0		0	0	0	0	0	0	0	0	0	0	0	0	0	0	0	0		0	0	0	0	0	0	0	0	0	0	0	0	0	0	0	0		1	1	2	0	0	2
708	AC194402.2_FG004	0	0	0	0	0	0	0		4	1	4	0	2	0	3	0	0	4	0	4	0	3	0	4		1	3	1	1	3	6	9	3	2	3	3	6	5	3	2	4		25	16	16	16	18	13
709	AC194405.3_FG009	0	0	0	0	0	0	0		0	0	0	0	0	0	0	0	0	0	0	0	0	0	0	0		0	0	0	0	0	0	0	0	0	0	0	0	0	0	0	0		1	1	0	0	1	0
710	AC194405.3_FG021	0	0	0	0	0	0	0		0	0	1	0	1	0	2	0	0	0	1	0	0	1	0	0		1	1	0	1	3	2	1	0	1	0	2	0	0	1	0	0		10	11	16	12	11	14
711	AC194410.3_FG002	0	0	0	0	0	0	0		0	0	0	0	0	0	0	0	0	0	0	0	0	0	0	0		0	0	0	0	0	0	0	0	0	0	0	0	0	0	0	0		0	3	3	0	1	1
712	AC194425.3_FG005	0	0	0	0	1	0	0		5	0	7	0	15	0	10	0	0	2	0	1	0	5	0	3		1	0	0	1	8	5	9	1	1	5	0	0	1	5	3	2		306	235	301	312	251	190
713	AC194428.3_FG006	0	0	0	0	0	0	0		0	0	0	0	0	0	0	0	0	0	0	1	0	0	0	0		1	0	1	0	0	0	1	0	0	0	0	0	1	0	0	0		7	9	5	8	5	9
714	AC194428.3_FG007	0	0	0	0	0	0	0		0	0	0	0	0	0	0	0	0	0	0	0	0	0	0	0		0	0	0	0	0	0	0	0	0	0	0	0	0	0	0	0		4	4	3	3	6	7
715	AC194438.3_FG005	0	0	0	0	0	0	0		0	0	0	0	0	0	0	0	0	0	0	0	0	0	0	0		0	0	0	0	0	0	0	0	0	0	0	0	0	0	0	0		0	0	0	0	0	0
716	AC194439.3_FG002	0	0	0	0	0	0	0		0	0	0	0	0	0	0	0	0	0	0	0	0	0	0	0		0	0	0	0	0	0	0	0	1	0	0	0	0	0	0	0		1	7	2	4	1	3
717	AC194452.3_FG001	0	0	0	0	0	0	0		0	0	0	0	0	0	0	0	0	0	0	0	0	0	0	0		0	0	0	0	0	0	0	0	0	0	0	0	0	0	0	0		2	1	0	0	0	1
718	AC194457.3_FG001	0	0	0	0	0	0	0		0	0	0	0	0	0	0	0	0	0	0	0	0	0	0	0		0	0	0	0	0	0	0	0	0	0	0	0	0	0	0	0		5	7	8	3	6	4
719	AC194467.3_FG006	0	0	0	0	0	0	0		0	0	0	0	0	0	0	0	0	0	0	0	0	0	0	0		0	0	0	0	0	0	0	0	0	0	0	0	0	0	0	0		5	3	2	4	5	5
720	AC194472.3_FG001	0	0	0	0	0	0	0		0	0	0	0	0	0	0	0	0	0	0	0	0	0	0	0		0	0	0	0	0	0	0	0	0	0	0	0	0	0	0	0		0	0	0	0	0	0
721	AC194478.3_FG005	0	0	0	0	0	0	0		0	0	0	0	0	0	1	0	0	0	0	1	0	0	0	0		0	0	0	0	0	0	0	0	0	0	0	0	0	0	0	0		2	1	1	2	1	1
722	AC194480.3_FG001	0	0	0	0	0	0	0		0	0	0	0	0	0	0	0	0	0	0	0	0	0	0	0		0	0	0	0	0	0	0	0	0	0	0	0	0	0	0	0		0	0	0	0	0	0
723	AC194480.3_FG003	0	0	0	0	0	0	0		0	0	0	0	0	0	0	0	0	0	0	0	0	0	0	0		0	0	0	0	0	0	0	0	0	0	0	0	0	0	0	0		0	0	0	0	0	0
724	AC194481.3_FG002	0	0	0	0	0	0	0		0	0	0	0	0	0	0	0	0	0	0	0	0	0	0	0		0	0	0	0	0	0	0	0	0	0	0	0	0	0	0	0		0	0	0	0	1	0
725	AC194485.3_FG002	0	0	0	0	0	0	0		0	0	0	0	0	0	0	0	0	0	0	0	0	0	0	0		0	0	0	0	0	0	0	0	0	0	0	0	0	0	0	0		1	0	0	0	1	0
726	AC194591.2_FG004	0	0	0	0	0	0	0		0	0	0	0	0	0	0	0	0	0	0	0	0	0	0	0		0	0	0	0	0	0	0	0	0	0	0	0	0	0	0	0		0	0	0	0	0	0
727	AC194591.2_FG005	0	0	1	0	1	0	0		0	0	0	0	0	0	0	0	0	4	0	2	0	5	0	10		0	2	0	4	0	3	0	3	0	2	0	0	0	2	0	1		0	12	7	4	0	10
728	AC194592.2_FG001	0	0	0	0	0	0	0		0	0	0	0	0	0	0	0	0	0	0	0	0	0	0	0		0	0	0	0	0	0	0	0	0	0	0	0	0	0	0	0		1	3	3	1	0	3
729	AC194597.2_FG001	0	0	0	0	0	0	0		0	0	0	0	0	0	0	0	0	0	0	0	0	0	0	0		0	0	0	0	0	0	0	0	0	0	0	0	0	0	0	0		1	1	2	0	1	0
730	AC194609.2_FG003	0	0	0	0	0	0	0		2	0	0	0	1	0	0	0	0	0	0	3	0	0	0	1		1	0	1	0	1	0	0	0	0	0	2	0	0	0	0	0		30	20	20	17	19	19
731	AC194613.2_FG002	0	0	0	0	0	0	0		0	0	0	0	0	0	0	0	0	0	0	0	0	0	0	0		0	0	0	0	0	0	0	0	0	0	0	0	0	0	0	0		1	0	0	0	0	1
732	AC194633.3_FG014	0	0	1	0	0	0	0		0	0	0	0	0	0	0	0	0	0	0	0	0	0	1	0		0	0	0	0	0	0	0	0	0	0	0	0	1	0	0	0		0	1	5	0	0	2
733	AC194666.2_FG010	0	0	0	0	0	0	0		0	0	0	0	0	0	0	0	0	0	0	0	0	0	0	0		0	0	0	0	0	0	0	0	0	0	0	0	0	0	0	0		2	2	1	1	3	2
734	AC194670.2_FG001	0	0	0	0	0	0	0		0	0	0	0	0	0	0	0	0	0	0	0	0	0	0	0		0	0	0	0	0	0	0	0	0	0	0	0	0	0	0	0		0	2	0	0	0	0
735	AC194705.3_FG004	0	0	0	0	0	0	0		0	0	0	0	0	0	1	0	0	0	0	0	0	0	0	0		0	0	0	0	0	0	0	0	0	0	0	0	0	0	0	0		1	1	0	0	0	1
736	AC194712.3_FG002	0	0	0	0	0	0	0		0	0	0	0	0	0	0	0	0	0	0	0	0	0	0	0		0	0	0	0	0	0	0	0	0	0	0	0	0	0	0	0		1	0	0	0	1	0
737	AC194719.3_FG002	0	0	0	0	0	0	0		0	0	0	0	0	0	0	0	0	0	0	0	0	0	0	0		0	0	0	0	0	0	0	0	0	0	0	0	0	0	0	0		1	1	1	0	1	0
738	AC194734.3_FG004	0	0	0	0	0	0	0		0	0	0	0	0	0	0	0	0	0	0	0	0	0	0	0		0	0	0	0	0	0	0	0	0	0	0	0	0	0	0	0		3	3	0	0	1	1
739	AC194824.2_FG003	0	0	0	0	0	0	0		0	0	0	0	0	0	0	0	0	0	0	0	0	0	0	0		0	0	0	0	0	0	0	0	0	0	0	0	0	0	0	0		0	1	1	4	2	2
740	AC194824.2_FG005	0	0	0	0	0	0	0		0	0	0	0	0	0	0	0	0	0	0	0	0	0	0	0		0	0	0	0	1	0	0	0	0	0	0	0	0	0	0	0		5	2	2	3	0	1
741	AC194828.3_FG004	0	0	0	0	0	0	0		0	0	0	0	2	0	0	0	0	0	0	0	1	0	0	1		0	0	0	0	1	0	1	0	0	0	0	0	0	0	0	0		0	0	0	0	0	0
742	AC194828.3_FG012	0	0	0	0	0	0	0		0	0	0	0	0	0	0	0	0	0	0	0	0	0	0	0		0	0	0	0	0	0	0	0	0	0	0	0	0	0	0	0		0	0	0	0	0	0
743	AC194839.3_FG001	0	0	0	0	0	0	0		0	0	0	0	0	0	0	0	0	0	0	0	0	0	0	0		0	0	0	0	0	0	0	0	0	0	0	0	0	0	0	0		0	1	0	0	0	0
744	AC194852.3_FG007	0	0	0	0	0	0	0		1	0	1	1	0	0	0	0	0	1	0	0	0	0	0	0		0	0	1	0	0	0	2	0	0	0	1	0	1	0	0	0		4	1	0	4	6	1
745	AC194853.1_FG002	0	0	0	0	0	0	0		0	0	0	0	0	0	0	0	0	0	0	0	0	0	0	0		0	0	0	0	0	0	0	0	0	0	0	0	0	0	0	0		0	0	0	0	0	1
746	AC194856.3_FG002	0	0	0	0	0	0	0		0	0	0	0	0	0	0	0	0	0	0	0	0	0	0	0		0	0	0	0	0	0	0	0	0	0	0	0	0	0	0	0		0	0	0	0	0	0
747	AC194856.3_FG007	0	0	0	0	0	0	0		0	0	0	0	0	0	0	0	0	0	0	0	0	0	0	0		0	0	0	0	0	0	0	0	0	0	0	0	0	0	0	0		0	0	0	0	0	0
748	AC194863.3_FG004	0	0	0	0	0	0	0		0	0	0	0	0	0	0	0	1	0	0	0	0	0	0	0		0	0	0	0	0	0	0	0	0	0	0	0	0	0	0	0		0	1	0	0	1	0
749	AC194863.3_FG006	0	0	0	0	0	0	0		0	0	0	0	0	0	0	0	0	0	0	0	0	0	0	0		0	0	0	0	0	0	0	0	0	0	0	0	0	0	0	0		1	1	1	0	0	1
750	AC194863.3_FG007	0	0	1	0	0	0	0		0	0	0	0	0	0	0	0	0	0	0	0	0	0	0	0		0	0	0	0	0	0	0	0	0	0	0	0	0	0	0	0		0	7	2	2	1	7
751	AC194878.3_FG001	0	1	0	0	0	0	0		3	0	0	0	1	0	1	0	0	0	0	0	0	0	0	0		0	0	0	0	0	0	0	0	0	0	0	0	0	0	0	0		6	0	4	0	5	0
752	AC194878.3_FG002	0	1	0	0	0	0	0		0	0	0	0	0	0	0	0	0	0	0	0	0	0	0	0		0	0	0	0	0	0	0	0	0	0	0	0	0	0	0	0		8	0	1	3	5	0
753	AC194895.3_FG004	0	0	0	0	0	0	0		0	0	0	0	0	0	0	0	0	0	0	0	0	0	0	0		0	0	0	0	0	0	0	0	0	0	0	0	0	0	0	0		0	0	0	1	0	1
754	AC194897.4_FG003	0	0	0	0	0	0	0		0	0	0	0	0	0	0	0	0	0	0	0	0	0	0	0		0	0	0	0	0	0	0	0	0	0	0	0	0	0	0	0		0	2	0	1	1	0
755	AC194897.4_FG005	0	0	0	0	0	0	0		0	0	0	0	0	0	0	0	0	0	0	0	0	0	0	0		0	0	0	0	0	0	0	0	0	0	0	0	0	0	0	0		4	3	4	2	4	3
756	AC194898.3_FG003	0	0	0	0	0	0	0		0	0	1	0	0	0	0	0	0	0	0	0	0	0	0	0		0	0	0	0	1	0	0	0	0	0	0	0	0	0	0	0		1	6	3	7	3	8
757	AC194905.2_FG001	0	0	0	0	0	0	0		0	0	0	0	0	0	0	0	0	0	0	0	0	0	0	0		0	0	0	0	0	0	0	0	0	0	0	0	0	0	0	0		1	0	2	0	0	0
758	AC194905.2_FG003	0	0	0	0	0	0	0		0	0	0	0	0	0	0	0	1	2	0	3	1	5	2	2		2	1	0	0	0	2	0	5	1	2	1	2	0	4	0	1		4	12	7	15	3	9
759	AC194912.3_FG003	0	0	0	0	0	0	0		0	0	0	0	0	0	0	0	0	0	0	0	0	0	0	0		0	0	0	0	0	0	0	0	0	0	0	0	0	0	0	0		0	0	0	1	0	1
760	AC194914.3_FG002	0	0	0	0	1	0	0		13	0	8	0	20	0	24	0	0	6	0	7	0	20	0	20		3	5	2	3	6	14	11	18	10	7	0	2	9	8	16	11		240	81	202	217	204	133
761	AC194937.3_FG004	0	0	0	0	0	0	0		0	0	0	0	0	0	0	0	0	0	0	0	0	0	0	0		0	0	0	0	1	0	0	0	0	0	0	0	0	0	0	0		2	3	2	1	0	2
762	AC194940.3_FG001	0	0	0	0	0	0	0		0	0	0	0	0	0	0	0	0	0	0	0	0	0	0	0		0	0	0	0	0	0	0	0	0	0	0	0	0	0	0	0		1	0	0	0	0	0
763	AC194942.3_FG001	0	0	1	0	0	0	0		0	0	0	0	0	0	0	0	0	0	0	1	0	2	1	2		0	0	0	0	0	1	0	0	0	1	0	2	0	0	0	1		0	12	7	22	0	24
764	AC194965.4_FG001	0	0	0	0	0	0	0		0	0	0	0	0	0	0	0	0	0	0	0	0	0	0	0		0	0	0	0	0	0	0	0	0	0	0	0	0	0	0	0		310	285	257	332	296	263
765	AC194965.4_FG004	0	0	0	0	1	0	0		6	0	3	0	1	0	4	0	1	6	0	6	0	10	0	6		0	5	3	3	3	4	2	8	0	4	2	3	1	5	4	4		191	149	154	171	170	156
766	AC194970.5_FG001	0	0	0	0	0	0	0		0	0	0	0	0	0	0	0	0	0	0	0	0	0	0	0		0	0	0	0	0	0	0	0	0	0	0	0	0	0	0	0		302	165	223	184	194	172
767	AC194970.5_FG002	0	0	0	0	0	0	0		21	0	23	1	27	0	27	0	0	9	0	10	0	26	0	15		5	14	6	3	17	9	8	13	5	13	14	13	8	6	14	11		114	51	129	93	103	72
768	AC194970.5_FG004	0	0	0	0	0	0	0		0	0	0	0	0	0	0	0	0	0	0	0	0	0	0	0		0	0	0	0	0	0	0	0	0	0	0	0	0	0	0	0		396	553	380	497	398	475
769	AC194970.5_FG005	0	0	0	0	0	0	0		0	0	0	0	0	0	0	0	0	0	0	0	0	0	0	0		0	0	0	0	0	0	0	0	0	0	0	0	0	0	0	0		726	577	710	757	693	507
770	AC194970.5_FG009	0	0	0	0	0	0	0		0	0	0	0	0	0	0	0	0	0	0	0	0	0	0	0		0	0	0	0	0	0	0	0	0	0	0	0	0	0	0	0		627	509	476	546	525	431
771	AC194972.2_FG001	0	0	0	0	0	0	0		0	0	1	0	0	0	1	0	0	0	0	0	0	0	0	0		0	0	1	0	0	0	0	0	0	0	0	0	0	0	0	0		0	0	0	0	1	0
772	AC194974.3_FG001	0	0	0	0	0	0	0		0	0	0	0	0	0	0	0	0	0	0	0	0	0	0	0		0	0	0	0	0	0	0	0	0	0	0	0	0	0	0	0		2	0	1	2	0	0
773	AC194974.3_FG005	0	0	0	0	0	0	0		0	0	0	0	0	0	0	0	0	0	0	0	0	0	0	0		0	0	0	0	0	0	0	0	0	0	0	0	0	0	0	0		189	115	123	180	156	84
774	AC194977.2_FG004	0	0	0	0	0	0	0		0	0	1	0	0	0	0	0	2	0	0	0	0	0	1	1		0	0	0	0	0	0	0	0	1	0	1	0	0	0	0	0		5	7	4	6	3	5
775	AC194980.3_FG002	0	0	0	0	0	0	0		0	0	0	0	0	0	0	0	0	0	0	0	0	0	0	0		0	0	0	0	0	0	0	0	0	0	0	0	0	0	0	0		2	0	2	0	0	1
776	AC194980.3_FG005	0	0	0	0	0	0	0		0	0	0	0	0	0	0	0	0	0	0	0	0	0	0	0		0	0	0	0	0	0	0	0	0	0	0	0	0	0	0	0		0	0	1	2	0	1
777	AC195058.3_FG003	0	0	0	0	0	0	0		0	0	0	0	0	0	0	0	0	0	0	0	0	0	0	0		0	0	0	0	0	0	0	0	0	0	0	0	0	0	0	0		4	0	6	2	1	0
778	AC195135.3_FG002	0	0	0	0	0	0	0		0	0	0	0	0	0	0	0	0	0	0	0	0	0	0	0		0	0	0	0	0	0	0	0	0	0	0	0	0	0	0	0		0	0	2	0	0	0
779	AC195138.3_FG004	0	0	0	0	1	1	1		15	0	15	0	16	0	17	0	0	39	0	36	0	55	2	43		4	29	3	20	5	34	12	34	4	19	5	18	9	23	3	20		61	43	65	38	58	39
780	AC195147.3_FG001	0	0	0	0	0	0	0		0	0	0	0	0	0	0	0	0	0	0	0	0	0	0	0		0	0	0	0	0	0	0	0	0	0	0	0	0	0	0	0		4	4	1	3	2	2
781	AC195147.3_FG008	0	0	0	0	1	1	1		59	1	46	0	77	0	93	0	1	17	0	24	0	45	1	36		40	14	21	10	33	19	45	22	37	15	19	12	37	23	26	19		133	46	117	96	114	53
782	AC195148.3_FG001	0	0	0	0	0	0	0		0	0	0	0	0	0	0	0	0	0	0	0	0	0	0	0		0	0	0	0	0	0	0	0	0	0	0	0	0	0	0	0		0	0	0	0	0	0
783	AC195154.3_FG004	0	0	0	0	0	0	0		0	0	0	0	0	0	0	0	0	0	0	0	0	0	0	0		0	1	1	0	0	0	0	0	0	1	0	0	0	0	0	0		83	143	100	447	247	576
784	AC195168.2_FG004	0	0	0	0	0	0	0		0	0	0	0	0	0	0	0	0	0	0	0	0	0	0	0		0	0	0	0	0	0	0	0	0	0	0	0	0	0	0	0		0	1	0	0	0	0
785	AC195172.3_FG001	0	0	0	0	1	1	1		39	0	44	0	11	0	7	0	0	0	0	0	0	0	1	0		22	0	24	0	2	0	3	0	28	0	21	0	0	0	10	0		175	1	108	111	217	1
786	AC195174.2_FG007	0	0	0	0	0	0	0		0	0	0	0	0	0	0	0	0	0	0	0	0	0	0	0		0	0	0	0	0	0	0	0	0	0	0	0	0	0	0	0		0	0	0	0	0	0
787	AC195207.2_FG002	0	0	0	0	0	0	0		0	0	0	0	0	0	0	0	0	0	0	0	0	0	0	0		0	0	0	0	0	0	0	0	0	0	0	0	0	0	0	0		0	0	0	0	0	0
788	AC195214.3_FG007	0	0	0	0	0	0	0		0	0	0	0	0	0	0	0	0	0	0	0	0	0	0	0		0	0	0	0	0	0	0	0	0	0	0	0	0	0	0	0		1	0	0	0	1	0
789	AC195220.3_FG003	0	0	0	0	0	0	0		0	0	0	0	0	0	0	0	0	0	0	0	0	0	0	0		0	0	0	0	0	0	0	0	0	0	0	0	0	0	0	0		0	1	0	0	0	0
790	AC195220.3_FG004	0	0	0	0	0	0	0		0	0	0	0	0	0	0	0	0	0	0	0	0	0	0	0		0	0	0	0	0	0	0	0	0	0	0	0	0	0	0	0		0	0	0	1	0	1
791	AC195220.3_FG007	0	0	0	0	0	0	0		0	0	0	0	0	0	0	0	0	0	0	0	0	0	0	0		0	0	0	0	0	0	0	0	0	0	0	0	0	0	0	0		0	0	0	0	0	0
792	AC195230.2_FG003	0	0	0	0	0	0	0		0	0	0	0	0	0	0	0	0	0	0	0	0	0	0	0		0	0	0	0	0	0	0	0	0	0	0	0	0	0	0	0		0	0	0	0	0	0
793	AC195235.3_FG003	0	0	0	0	0	0	0		0	0	0	0	0	0	0	0	0	3	0	1	0	3	1	2		1	0	0	3	0	1	0	1	1	0	1	0	0	0	1	1		5	8	3	8	1	10
794	AC195240.4_FG002	0	0	0	0	0	0	0		0	0	0	0	0	0	0	0	0	0	0	0	0	0	0	0		0	0	0	0	0	0	0	0	0	0	0	0	0	0	0	0		0	0	0	0	0	0
795	AC195244.3_FG008	0	0	0	0	0	0	0		0	0	0	0	0	0	0	0	0	0	0	0	0	0	0	0		0	0	0	0	0	0	0	0	0	0	0	0	0	0	0	0		0	1	1	1	2	3
796	AC195253.3_FG002	0	0	0	0	0	0	0		0	0	0	0	0	0	0	0	0	0	0	0	0	0	0	0		0	0	0	0	0	0	0	0	0	0	0	0	0	0	0	0		0	0	0	0	0	0
797	AC195260.2_FG007	0	0	0	0	0	0	0		0	0	0	0	0	0	0	0	1	0	0	0	0	1	0	2		1	0	0	0	0	0	0	0	1	0	1	0	0	0	0	0		5	7	6	4	4	8
798	AC195307.3_FG001	0	0	0	0	0	0	0		0	0	0	0	0	0	0	0	0	0	0	0	0	0	0	0		0	0	0	0	0	0	0	0	0	0	0	0	0	0	0	0		0	0	0	0	0	0
799	AC195320.3_FG003	0	0	0	0	0	0	0		0	0	0	0	0	0	0	0	0	0	0	0	0	0	0	0		0	0	0	0	0	0	0	0	0	0	0	0	0	0	0	0		0	0	0	0	0	0
800	AC195331.3_FG008	0	0	0	0	0	0	0		4	1	4	0	14	0	15	0	0	0	0	1	0	4	0	0		0	0	3	1	2	0	6	3	3	2	6	3	1	1	4	2		16	3	12	18	11	1
801	AC195340.3_FG001	0	0	0	0	1	1	1		131	0	101	0	115	1	135	1	0	84	0	72	2	86	1	78		79	42	63	51	88	67	98	68	89	69	53	49	86	73	110	68		5310	3447	5415	4217	3705	2747
802	AC195340.3_FG002	0	0	0	0	1	1	1		78	0	79	0	91	0	93	0	1	52	0	45	1	75	0	61		55	27	51	34	61	45	64	49	59	43	44	24	58	38	64	44		662	555	614	695	594	489
803	AC195340.3_FG004	0	0	0	0	0	1	0		372	3	352	1	54	0	42	0	2	290	3	271	0	61	0	41		144	143	255	211	43	32	19	21	249	180	161	124	17	40	16	22		1179	1161	1056	1257	1061	1125
804	AC195340.3_FG005	0	0	0	0	0	0	0		1	0	0	0	0	0	0	0	0	0	0	1	0	0	0	1		0	0	0	0	0	0	0	0	0	0	0	0	0	0	0	0		2	1	1	1	1	1
805	AC195342.3_FG002	0	0	0	0	0	0	0		0	0	0	0	0	0	0	0	0	0	0	0	0	0	0	0		0	0	0	0	0	0	0	0	0	0	0	0	0	0	0	0		0	1	0	0	0	0
806	AC195343.3_FG002	0	0	0	0	0	0	0		0	0	0	0	0	0	0	0	0	0	0	0	0	0	0	0		0	0	0	0	0	0	0	0	0	0	0	0	0	0	0	0		4	60	33	34	2	56
807	AC195347.4_FG004	0	0	0	0	0	0	0		62	0	53	0	84	0	84	0	2	50	2	54	0	70	1	71		28	29	17	22	43	52	47	37	29	36	20	28	41	45	34	36		314	243	241	276	243	237
808	AC195348.3_FG004	0	0	0	0	0	0	0		0	0	0	0	0	0	0	0	0	0	0	0	0	0	0	0		0	0	0	0	0	0	0	0	0	0	0	0	0	0	0	0		0	0	1	0	1	0
809	AC195351.3_FG001	0	0	0	0	0	0	0		0	0	0	0	0	0	0	0	0	0	0	0	0	0	0	0		0	0	0	0	0	0	0	0	0	0	0	0	0	0	0	0		0	0	0	0	0	2
810	AC195351.3_FG003	0	0	0	0	0	0	0		2	0	0	0	0	0	0	0	0	0	0	0	0	0	0	0		0	0	0	0	0	0	0	0	0	0	0	0	0	0	0	0		2	0	0	0	0	0
811	AC195367.3_FG001	0	0	0	0	0	0	0		0	0	0	0	0	0	0	0	0	0	0	0	0	0	0	0		0	0	0	0	0	0	0	0	0	0	0	0	0	0	0	0		0	0	0	1	0	1
812	AC195370.3_FG004	0	0	0	0	0	0	0		0	0	0	0	0	0	0	0	0	0	0	0	0	0	0	0		0	0	0	0	0	0	0	0	0	0	0	0	0	0	0	0		0	0	0	0	0	1
813	AC195378.3_FG001	0	0	0	0	0	0	0		0	0	0	0	0	0	0	0	0	0	0	0	0	0	0	0		0	0	0	0	0	0	0	0	0	0	0	0	0	0	0	0		1	1	0	0	0	0
814	AC195389.3_FG001	0	0	0	0	0	0	0		0	0	0	0	0	0	0	0	0	2	0	0	0	0	0	1		0	0	0	1	0	0	0	0	0	0	0	1	0	0	0	0		0	3	0	0	0	1
815	AC195402.3_FG001	0	0	0	0	0	0	0		0	0	0	0	0	0	0	0	0	0	0	0	0	0	0	0		0	0	0	0	0	0	0	0	0	0	0	0	0	0	0	0		1	0	1	0	0	1
816	AC195458.3_FG001	0	0	0	0	0	0	0		0	0	0	0	0	0	0	0	0	0	0	0	0	0	0	0		0	0	0	0	0	0	0	0	0	0	0	0	0	0	0	0		0	0	0	0	0	0
817	AC195484.3_FG003	0	0	0	0	0	0	0		0	0	0	0	0	0	0	0	0	1	0	0	0	0	0	0		1	0	1	0	1	1	0	0	2	0	0	0	0	0	0	0		1	6	3	7	3	1
818	AC195485.3_FG002	0	0	0	0	0	0	0		0	0	0	0	0	0	0	0	0	0	0	0	0	0	0	0		0	0	0	0	0	0	0	0	0	0	0	0	0	0	0	0		2	0	0	0	1	1
819	AC195536.3_FG006	0	0	0	0	0	0	0		0	0	0	0	0	0	0	0	0	0	0	0	0	0	0	0		0	0	0	0	0	0	0	0	0	0	0	0	0	0	0	0		0	0	0	0	0	0
820	AC195545.3_FG003	0	0	0	0	0	0	0		0	0	0	0	0	0	0	0	0	0	0	0	0	0	0	0		0	0	0	0	0	0	0	0	0	0	0	0	0	0	0	0		0	0	0	0	0	0
821	AC195580.2_FG010	0	0	0	0	0	0	0		0	0	0	0	0	0	0	0	0	0	0	0	0	0	0	0		0	0	0	0	0	0	0	0	0	0	0	0	0	0	0	0		0	0	0	0	0	0
822	AC195587.4_FG003	0	0	0	0	0	0	0		0	0	0	0	0	0	0	0	0	0	0	0	0	0	0	0		0	0	0	0	0	0	0	0	0	0	0	0	0	0	0	0		1	0	2	0	0	2
823	AC195587.4_FG004	0	0	0	0	1	1	1		90	0	87	1	83	0	78	0	2	50	1	35	0	20	1	45		38	28	60	38	32	27	29	17	39	16	39	10	32	23	35	13		395	347	354	416	376	344
824	AC195596.3_FG002	0	0	0	0	0	0	0		0	0	0	0	0	0	0	0	0	0	0	0	0	0	0	0		0	0	0	0	0	0	0	0	0	0	0	0	0	0	0	0		0	0	0	0	0	0
825	AC195596.3_FG005	0	0	0	0	0	0	0		0	0	0	0	0	0	0	0	0	0	0	0	0	0	0	0		0	0	0	0	0	0	0	0	0	0	0	0	0	0	0	0		0	0	0	0	0	0
826	AC195608.3_FG005	0	0	0	0	0	0	0		0	0	0	0	0	0	0	0	0	0	0	0	0	0	0	0		0	0	0	0	0	0	0	0	0	0	0	0	0	0	0	0		0	0	0	0	0	0
827	AC195608.3_FG006	0	0	0	0	0	0	0		0	0	0	0	0	0	0	0	0	0	0	0	0	0	0	0		0	0	0	0	0	0	0	0	0	0	0	0	0	0	0	0		0	0	0	0	0	0
828	AC195685.3_FG001	0	0	0	0	0	0	0		0	0	0	0	0	0	0	0	0	0	0	0	0	0	0	0		0	0	0	0	0	0	0	0	1	0	0	0	0	0	0	0		0	0	0	1	1	2
829	AC195785.3_FG004	0	0	0	0	0	0	0		19	1	12	0	14	0	27	0	0	12	0	17	0	14	0	26		15	15	6	9	10	12	4	13	12	10	11	12	4	7	6	11		208	167	234	197	144	186
830	AC195794.3_FG002	0	0	0	0	0	0	0		0	0	0	0	0	0	0	0	0	0	0	0	0	0	0	0		0	0	0	0	0	0	0	0	0	0	0	0	0	0	0	0		0	0	0	0	0	0
831	AC195796.3_FG001	0	0	0	0	0	0	0		0	0	0	0	0	0	0	0	0	0	0	0	0	0	0	0		0	0	0	0	0	0	0	0	0	0	0	0	0	0	0	0		6	2	4	2	1	1
832	AC195798.3_FG001	0	0	0	0	0	0	0		0	0	0	0	0	0	0	0	0	0	0	0	0	0	0	0		0	0	0	0	0	0	0	0	0	0	0	0	0	0	0	0		0	1	1	1	0	0
833	AC195806.3_FG001	0	0	0	0	0	0	0		0	0	0	0	0	0	0	0	0	0	0	0	0	0	0	0		0	0	0	0	0	0	0	0	0	0	0	0	0	0	0	0		0	0	1	0	0	0
834	AC195807.3_FG004	0	0	0	0	0	0	0		0	0	0	0	0	0	0	0	0	0	0	0	0	0	0	0		0	0	0	0	0	0	0	0	0	0	0	0	0	0	0	0		3	2	7	2	3	4
835	AC195825.3_FG001	0	0	0	0	0	0	0		0	0	0	0	0	0	0	0	0	0	0	0	0	0	0	0		0	0	0	0	0	0	0	0	0	0	0	0	0	0	0	0		3	1	1	0	1	2
836	AC195826.2_FG006	0	0	0	0	0	0	0		0	0	0	0	0	0	0	0	0	0	0	0	0	0	0	0		0	0	0	0	0	0	0	0	0	0	0	0	0	0	0	0		1	0	1	1	0	2
837	AC195860.3_FG002	0	0	0	0	0	0	0		0	0	0	0	0	0	0	0	0	0	0	0	0	0	0	0		0	0	0	0	0	0	0	0	0	0	0	0	0	0	0	0		0	0	0	0	0	0
838	AC195860.3_FG005	0	0	0	0	1	1	1		7	0	9	0	7	0	9	0	0	1	0	2	0	2	0	7		8	0	9	0	3	0	3	0	5	0	12	0	5	0	3	1		64	67	69	75	58	62
839	AC195860.3_FG006	0	0	0	0	0	0	0		96	0	73	0	71	1	79	0	0	72	1	54	0	63	1	68		34	42	45	33	42	33	53	33	37	40	63	46	46	36	48	38		884	984	869	773	838	823
840	AC195864.3_FG017	0	0	0	0	0	0	0		0	0	0	0	0	0	0	0	0	0	0	0	0	0	0	0		0	0	0	0	0	0	0	0	0	0	0	0	0	0	0	0		32	16	20	18	31	16
841	AC195864.3_FG020	0	0	0	0	0	0	0		0	0	0	0	0	0	0	0	0	0	0	0	0	0	0	0		0	0	0	0	0	0	0	0	0	0	0	0	0	0	0	0		0	1	0	0	0	0
842	AC195874.2_FG002	0	0	0	0	0	0	0		128	1	134	1	100	0	109	0	2	134	0	104	0	161	0	147		76	71	91	77	75	104	94	104	85	94	80	67	71	97	79	105		606	685	680	781	591	605
843	AC195914.2_FG002	0	0	1	0	0	0	0		0	0	0	0	0	0	0	0	0	0	0	0	0	0	0	1		0	0	0	0	0	1	0	0	0	0	0	0	0	0	0	1		0	3	0	2	0	2
844	AC195914.2_FG003	0	0	0	0	0	0	0		0	0	0	0	0	0	0	0	0	0	0	0	0	0	0	0		0	0	0	0	0	0	0	0	0	0	0	0	0	0	0	0		0	1	0	1	0	0
845	AC195920.3_FG006	0	0	0	0	0	0	0		0	0	0	0	0	0	0	0	0	0	0	0	0	0	0	0		0	0	0	0	0	0	0	0	0	0	0	0	0	0	0	0		0	0	0	0	0	0
846	AC195946.3_FG003	0	0	0	0	0	0	0		0	0	0	0	0	0	0	0	0	0	0	0	0	0	0	0		0	0	0	0	0	0	0	0	0	0	0	0	0	0	0	0		0	0	1	0	0	0
847	AC195954.3_FG001	0	0	0	0	0	0	0		0	0	0	0	0	0	0	0	0	0	0	0	0	0	0	0		0	0	0	0	0	0	0	0	0	0	0	0	0	0	0	0		0	0	2	1	0	0
848	AC195957.3_FG003	0	0	0	0	0	0	0		2	0	3	0	0	1	4	0	0	0	1	0	0	2	0	2		0	0	0	0	1	1	2	1	1	1	1	0	1	0	3	2		7	7	4	3	11	5
849	AC195959.2_FG004	0	0	1	0	0	0	0		0	0	0	0	0	0	0	0	0	0	0	0	0	0	0	0		0	0	0	0	0	0	0	0	0	0	0	0	0	0	0	0		0	3	3	1	0	8
850	AC195980.2_FG004	0	0	0	0	0	0	0		0	0	0	0	0	0	0	0	0	0	0	0	0	0	0	0		0	0	0	0	0	0	0	0	1	0	0	0	0	0	0	0		11	1	3	5	3	2
851	AC195989.3_FG004	0	0	0	0	0	0	0		0	0	0	0	0	0	1	0	0	0	0	0	0	0	0	0		0	0	0	0	0	0	1	0	0	0	0	0	0	0	0	0		0	0	0	0	0	1
852	AC195995.3_FG006	0	0	0	0	0	0	0		0	0	0	0	0	0	0	0	0	0	0	0	0	0	0	0		0	0	0	0	0	0	0	0	0	0	0	0	0	0	0	0		0	0	0	0	0	0
853	AC195995.3_FG008	0	0	0	0	0	0	0		0	0	0	0	0	0	0	0	0	0	0	0	0	0	0	0		0	0	0	0	0	0	0	0	0	0	0	0	0	0	0	0		0	0	1	0	1	1
854	AC195999.3_FG005	0	0	0	0	0	0	0		0	0	0	0	0	0	0	0	0	0	0	0	0	0	0	0		0	0	0	0	0	0	0	0	0	0	0	0	0	0	0	0		1	0	1	1	0	0
855	AC196002.2_FG002	0	0	0	0	0	0	0		0	0	0	0	0	0	0	0	0	0	0	0	0	0	0	0		0	0	0	0	0	0	0	0	0	0	0	0	0	0	0	0		0	1	2	0	0	0
856	AC196008.1_FG001	0	0	0	0	0	0	0		0	0	0	0	0	0	0	0	0	0	0	0	0	0	0	0		0	0	0	0	0	0	0	0	0	0	0	0	0	0	0	0		9	8	8	5	5	6
857	AC196008.1_FG004	0	0	0	0	0	0	0		0	0	0	0	0	0	0	0	0	0	0	0	0	0	0	0		0	0	0	0	0	0	0	0	0	0	0	0	0	0	0	0		0	0	0	0	0	0
858	AC196009.2_FG008	0	0	0	0	0	0	0		0	0	0	0	0	0	0	0	0	0	0	0	0	0	0	0		0	0	0	0	0	0	0	0	0	0	0	0	0	0	0	0		0	0	0	0	0	0
859	AC196018.3_FG003	0	0	0	0	0	0	0		0	0	0	0	0	0	0	0	0	0	0	0	0	0	0	0		0	0	0	0	0	0	0	0	0	0	0	0	0	0	0	0		0	1	1	2	0	1
860	AC196019.3_FG001	0	0	0	0	0	0	0		0	0	0	0	0	0	0	0	0	0	0	0	0	0	0	0		0	0	0	0	0	0	0	0	0	0	0	0	0	0	0	0		0	0	0	1	0	0
861	AC196025.3_FG001	0	0	0	0	0	0	0		0	0	0	0	0	0	0	0	0	0	1	0	0	0	0	0		1	0	0	0	0	0	0	0	0	0	0	0	0	0	0	0		1	1	3	3	1	3
862	AC196025.3_FG002	0	0	0	0	0	0	0		0	0	0	0	0	0	0	0	0	0	0	0	0	0	0	0		0	0	0	0	0	0	0	0	0	0	0	0	0	0	0	0		0	0	0	0	0	1
863	AC196025.3_FG008	0	0	0	0	0	0	0		0	0	0	0	0	0	0	0	0	0	0	0	0	0	0	0		0	0	0	0	0	0	0	0	0	0	0	0	0	0	0	0		0	0	2	0	0	1
864	AC196025.3_FG009	0	0	0	0	0	0	0		0	0	0	0	0	0	0	0	0	0	0	0	0	0	0	0		0	0	0	0	0	0	0	0	0	0	0	0	0	0	0	0		0	0	0	0	1	0
865	AC196025.3_FG010	0	0	0	0	0	0	0		0	0	0	0	0	0	0	0	0	0	0	0	0	0	0	0		0	0	0	0	0	0	0	0	0	0	0	0	0	0	0	0		0	0	0	0	0	0
866	AC196025.3_FG011	0	0	0	0	0	0	0		0	0	0	1	0	0	0	0	0	0	0	0	0	0	1	0		0	0	0	0	0	0	0	0	0	0	0	0	0	0	0	0		2	1	3	3	3	4
867	AC196025.3_FG012	0	0	0	0	0	0	0		0	0	0	0	0	0	0	0	0	0	0	0	0	0	0	0		0	0	0	0	0	0	0	0	0	0	0	0	0	0	0	0		0	0	0	0	0	1
868	AC196025.3_FG013	0	0	0	0	0	0	0		0	0	0	0	0	0	0	0	0	0	0	0	0	0	0	0		0	0	0	0	0	0	0	0	0	0	0	0	0	0	0	0		0	0	0	0	1	0
869	AC196025.3_FG015	0	0	0	0	0	0	0		0	0	0	0	0	0	0	0	0	0	0	0	0	0	0	0		0	0	0	0	0	0	0	0	0	0	0	0	0	0	0	0		2	2	3	4	4	3
870	AC196035.3_FG002	0	0	0	0	0	0	0		0	0	0	0	0	0	0	0	0	0	0	0	0	0	0	0		0	0	0	0	0	0	0	0	0	0	0	0	0	0	0	0		0	0	0	0	0	0
871	AC196043.3_FG005	0	0	0	0	0	0	0		0	0	0	0	0	0	0	0	0	0	0	0	0	0	0	0		0	0	0	0	0	0	0	0	0	0	0	0	0	0	0	0		10	5	0	5	5	6
872	AC196048.2_FG001	0	0	0	0	0	0	0		0	0	0	0	0	0	0	0	0	0	0	0	0	0	0	0		0	0	0	0	0	0	0	0	0	0	0	0	0	0	0	0		0	0	0	0	0	0
873	AC196059.3_FG003	0	0	0	0	0	0	0		9	0	2	0	5	0	4	0	0	3	0	1	0	4	0	3		1	0	2	2	4	0	1	1	1	1	2	2	2	0	1	1		30	15	14	14	20	16
874	AC196065.3_FG001	0	0	0	0	0	0	0		0	0	0	0	0	0	0	0	0	0	0	0	0	0	0	0		0	0	0	0	0	0	0	0	0	0	0	0	0	0	0	0		0	1	0	0	1	2
875	AC196066.3_FG003	0	0	0	0	0	0	0		31	0	26	0	11	0	9	0	0	14	0	17	0	5	1	8		22	13	11	12	6	4	4	2	9	13	15	11	5	8	6	8		118	57	111	66	97	58
876	AC196082.3_FG001	0	0	1	0	0	1	0		0	0	0	0	0	0	0	0	1	3	0	7	0	5	0	6		0	1	0	3	0	0	0	2	0	4	0	1	0	1	0	3		0	16	5	9	1	23
877	AC196090.3_FG006	0	0	0	0	0	1	0		5	0	8	0	13	0	16	0	0	1	1	7	1	7	0	11		2	3	4	2	11	5	4	4	6	7	8	4	9	5	8	0		44	18	48	52	32	36
878	AC196096.3_FG005	0	0	0	0	0	0	0		3	0	1	0	1	0	1	0	0	0	0	0	0	0	0	0		0	0	0	0	1	0	1	0	1	0	1	0	0	0	1	0		3	0	0	2	1	0
879	AC196105.3_FG002	0	0	0	0	0	0	0		0	0	0	0	0	0	0	0	0	0	0	0	0	0	0	0		0	0	0	0	0	0	0	0	0	0	0	0	0	0	0	0		1	0	0	1	0	0
880	AC196106.2_FG001	0	0	0	0	0	0	0		0	0	0	0	0	0	0	0	0	0	0	0	0	0	0	0		0	0	0	0	0	0	0	0	0	0	0	0	0	0	0	0		1	0	0	0	0	0
881	AC196110.4_FG004	0	0	0	0	0	0	0		0	0	0	0	0	0	0	0	0	0	0	0	0	0	0	0		0	0	0	0	0	0	0	0	0	0	0	0	0	0	0	0		0	0	2	2	2	0
882	AC196123.3_FG001	0	0	0	0	0	0	0		0	0	0	0	0	0	0	0	0	0	0	0	0	0	0	0		0	0	0	0	0	0	0	0	0	0	0	0	0	0	0	0		0	1	0	1	0	0
883	AC196130.3_FG002	0	0	0	0	0	0	0		0	0	0	0	0	0	0	0	0	0	0	0	0	0	0	0		0	0	0	0	0	0	0	0	0	0	0	1	0	0	0	0		0	0	0	0	0	0
884	AC196135.3_FG006	0	0	0	0	0	0	0		0	0	0	0	0	0	0	0	0	0	0	0	0	0	0	0		0	0	0	0	0	0	0	0	0	0	0	0	0	0	0	0		0	0	0	0	0	0
885	AC196143.2_FG003	0	0	0	0	0	0	0		0	0	0	0	0	0	0	0	0	0	0	0	0	0	0	0		0	0	0	0	0	0	0	0	0	0	0	0	0	0	0	0		0	0	1	1	1	1
886	AC196154.3_FG014	0	0	0	0	0	0	0		0	0	0	0	0	0	0	0	0	0	0	0	0	0	0	0		0	0	0	0	0	0	0	0	0	0	0	0	0	0	0	0		0	0	0	0	0	0
887	AC196154.3_FG018	0	0	0	0	0	0	0		0	0	0	0	0	0	0	0	0	0	0	0	0	0	0	0		0	0	1	0	0	0	0	0	0	0	1	0	0	0	0	0		11	13	5	9	14	14
888	AC196156.3_FG003	0	1	0	0	1	1	1		16	0	20	0	24	0	25	0	0	0	0	0	1	0	0	0		10	0	11	0	11	0	14	0	18	0	17	0	15	0	11	0		49	0	30	33	52	0
889	AC196158.3_FG002	0	0	0	0	0	0	0		0	0	0	0	0	0	0	0	0	0	0	0	0	0	0	0		0	0	0	0	0	0	0	0	0	0	0	0	0	0	0	0		3	2	0	2	1	2
890	AC196161.3_FG002	0	0	0	0	0	0	0		0	0	0	0	0	0	0	0	0	0	0	0	0	0	0	0		0	0	0	0	0	0	0	0	0	0	0	0	0	0	0	0		4	1	2	2	0	0
891	AC196161.3_FG004	0	0	0	0	0	0	0		0	0	0	0	0	0	0	0	0	0	0	0	0	0	0	0		0	0	0	0	0	0	0	0	0	0	0	0	0	0	0	0		1	0	3	0	1	1
892	AC196170.2_FG003	0	0	1	0	0	0	0		0	0	0	0	0	0	0	0	0	1	0	0	0	1	0	0		0	1	0	1	0	0	0	1	0	0	0	2	0	1	0	1		0	3	6	2	0	7
893	AC196171.6_FG002	0	0	0	0	0	0	0		0	0	0	0	0	0	0	0	0	0	0	0	1	0	0	0		0	0	1	0	0	0	0	0	0	0	0	0	0	0	0	0		0	0	1	1	0	2
894	AC196202.3_FG007	0	0	0	0	0	0	0		32	0	18	0	19	0	27	0	0	5	0	8	1	7	0	15		9	6	7	5	7	3	6	4	9	3	10	6	6	5	5	3		47	11	20	15	29	12
895	AC196206.3_FG007	0	0	0	0	0	0	0		0	0	0	0	0	0	0	0	0	0	0	0	0	0	0	0		0	0	0	0	0	0	0	0	0	0	0	0	0	0	0	0		0	0	0	0	0	0
896	AC196212.3_FG001	0	0	0	0	0	0	0		0	0	0	0	0	0	0	0	0	0	0	0	0	0	0	0		0	0	0	0	0	0	0	0	0	0	0	0	0	0	0	0		0	0	0	0	0	0
897	AC196213.3_FG001	0	0	0	0	0	0	0		0	0	0	0	0	0	0	0	0	0	0	0	0	0	0	0		0	0	0	0	0	0	0	0	0	0	0	0	0	0	0	0		2	2	1	2	2	3
898	AC196259.2_FG010	0	0	0	0	0	0	0		0	0	0	0	0	0	0	0	0	0	0	0	0	0	0	0		0	0	0	0	0	0	0	0	0	0	0	0	0	0	0	0		0	0	0	0	0	0
899	AC196262.4_FG006	0	0	0	0	0	0	0		1	0	0	0	0	0	0	0	0	0	0	0	1	0	0	0		0	0	1	0	0	0	0	1	0	0	0	0	0	0	0	1		1	4	1	1	1	1
900	AC196278.2_FG003	0	0	0	0	0	0	0		0	0	0	0	0	0	0	0	0	0	0	0	0	0	0	0		0	0	0	0	0	0	0	0	0	0	0	0	0	0	0	0		93	81	97	110	89	95
901	AC196278.2_FG004	0	0	0	0	0	0	0		0	0	0	0	0	0	0	0	0	0	0	0	0	0	0	0		0	0	0	0	0	0	0	0	0	0	0	0	0	0	0	0		65	85	60	127	81	74
902	AC196278.2_FG005	0	0	0	0	0	0	0		0	0	0	0	0	0	0	0	0	0	0	0	0	0	0	0		0	0	0	0	0	0	0	0	0	0	0	0	0	0	0	0		0	3	2	0	0	2
903	AC196290.3_FG007	0	0	0	0	0	0	0		0	0	0	0	0	0	0	0	0	0	0	0	0	0	0	0		0	0	0	0	0	0	0	0	0	0	0	0	0	0	0	0		3	0	1	1	3	0
904	AC196394.3_FG002	0	0	0	0	0	0	0		2	0	4	0	0	0	1	0	0	1	0	0	0	2	0	2		0	0	1	0	1	2	0	1	6	1	2	0	1	2	0	1		4	4	3	11	8	2
905	AC196395.3_FG001	0	0	0	0	0	0	0		0	0	0	0	0	0	0	0	0	0	0	0	0	0	0	0		0	0	0	0	0	0	0	0	0	0	0	0	0	0	0	0		5	6	6	1	2	3
906	AC196412.3_FG001	0	0	0	0	0	0	0		0	0	0	0	0	0	0	0	0	0	0	0	0	0	0	0		0	0	0	0	0	0	0	0	1	0	0	0	0	0	0	0		0	0	1	2	1	1
907	AC196417.3_FG008	0	0	0	0	0	0	0		0	0	0	0	0	0	0	0	0	0	0	0	0	0	0	0		0	0	0	0	0	0	0	0	0	0	0	0	0	0	0	0		0	0	0	1	0	0
908	AC196420.4_FG002	0	0	0	0	0	0	0		0	0	0	0	0	0	0	0	0	0	0	0	0	0	0	0		0	0	0	0	0	0	0	0	0	0	0	0	0	0	0	0		2	11	9	5	1	6
909	AC196426.3_FG007	0	0	0	0	0	0	0		26	0	21	0	19	0	12	0	0	34	0	25	0	36	1	21		4	14	13	19	17	12	13	18	15	14	15	13	16	12	14	16		1525	1688	1464	1725	1530	1568
910	AC196431.2_FG001	0	0	0	0	0	0	0		0	0	1	0	0	0	1	0	0	0	0	3	0	0	0	0		1	0	1	0	0	0	0	0	0	2	1	0	0	0	0	0		13	13	14	22	9	27
911	AC196432.3_FG007	0	0	0	0	0	0	0		0	0	0	0	0	0	0	0	0	0	0	0	0	0	0	0		0	0	0	0	0	0	0	0	0	0	0	0	0	0	0	0		0	0	1	0	0	0
912	AC196436.3_FG002	0	0	0	0	0	0	0		0	0	0	0	0	0	0	0	0	0	0	0	0	0	0	0		1	0	0	0	1	0	0	0	0	0	0	0	0	0	0	0		1	0	1	0	1	0
913	AC196437.3_FG001	0	0	0	0	0	0	0		0	0	0	0	0	0	0	0	0	0	0	0	0	0	0	0		0	0	0	0	0	0	0	0	0	0	0	0	0	0	0	0		5	8	10	7	6	5
914	AC196439.3_FG002	0	0	0	0	0	0	0		0	0	0	0	0	0	0	0	0	1	0	0	0	0	0	0		0	0	0	0	0	0	0	0	0	0	0	0	0	0	0	0		0	1	1	0	0	1
915	AC196465.3_FG002	0	0	0	0	0	0	0		0	0	0	0	0	0	0	0	0	0	0	0	0	0	0	0		0	0	0	0	0	0	0	0	0	0	0	0	0	0	0	0		32	21	27	37	16	23
916	AC196465.3_FG006	0	0	0	0	0	0	0		0	0	0	0	0	0	0	0	0	0	0	0	0	0	0	0		0	0	0	0	0	0	0	0	0	0	0	0	0	0	0	0		109	134	113	172	99	141
917	AC196470.3_FG007	0	0	0	0	0	0	0		2	0	3	0	5	0	2	0	0	1	0	3	0	11	0	9		2	1	0	3	0	2	4	5	2	0	1	1	1	7	1	1		9	7	18	7	6	10
918	AC196475.3_FG004	0	0	0	0	0	0	0		28	0	30	0	41	0	36	0	0	23	0	15	0	30	1	31		12	10	14	13	29	17	22	24	17	15	19	11	35	27	23	27		5778	3821	5831	4237	3989	3041
919	AC196475.3_FG005	0	0	0	0	1	1	1		279	0	255	0	328	3	320	0	2	309	0	211	1	334	2	365		120	104	143	141	193	185	227	171	167	179	147	150	224	179	225	182		965	1189	858	1088	907	861
920	AC196488.3_FG007	0	0	0	0	0	0	0		0	0	1	0	1	0	0	0	0	0	0	0	0	0	0	0		0	0	0	0	0	0	0	0	0	0	0	0	0	0	0	0		0	1	1	4	2	0
921	AC196489.3_FG002	0	0	0	0	0	0	0		0	0	0	0	0	0	0	0	0	0	0	0	0	0	0	0		0	0	0	0	0	0	0	0	0	0	0	0	0	0	0	0		902	461	851	662	747	426
922	AC196502.3_FG003	0	0	1	0	0	0	0		0	0	0	0	0	0	0	0	0	0	0	0	0	3	0	0		0	1	0	0	0	0	0	0	0	0	0	0	0	0	0	1		0	26	12	23	0	31
923	AC196575.3_FG007	0	0	0	0	0	0	0		0	0	0	0	0	0	0	0	0	0	0	0	0	0	0	0		0	0	0	0	0	0	0	0	0	0	0	0	0	0	0	0		2	0	0	1	0	1
924	AC196637.2_FG002	0	0	0	0	0	0	0		1	0	1	0	0	0	0	0	0	0	0	0	0	1	0	0		0	0	0	1	1	1	0	1	0	0	0	0	1	0	0	2		18	5	18	16	12	4
925	AC196642.4_FG003	0	0	0	0	0	0	0		0	0	0	0	0	0	0	0	0	0	0	0	0	0	0	0		0	0	0	0	0	0	0	0	0	0	0	0	0	0	0	0		0	1	1	0	0	1
926	AC196708.3_FG006	0	0	0	0	1	1	1		48	1	51	0	53	0	49	0	0	6	0	6	0	7	0	5		27	4	13	4	29	4	26	1	15	3	15	2	25	4	13	2		516	224	393	213	446	200
927	AC196709.3_FG001	0	0	0	0	0	0	0		0	0	0	0	0	0	0	0	0	0	0	0	0	0	0	0		0	0	0	0	0	0	0	0	0	0	0	0	0	0	0	0		0	0	0	0	0	0
928	AC196710.3_FG013	0	0	1	0	0	0	0		0	0	0	0	0	0	0	0	0	1	0	1	1	1	0	4		1	1	0	2	0	1	0	1	0	1	0	0	0	0	1	1		0	1	2	1	0	1
929	AC196714.3_FG004	0	0	0	0	0	0	0		0	0	0	0	0	0	0	0	0	0	1	0	0	0	0	0		0	1	0	0	0	0	0	0	0	0	0	0	0	0	0	0		8	3	6	2	2	5
930	AC196719.3_FG002	0	0	0	0	0	0	0		0	0	0	0	0	0	0	0	0	0	0	0	0	0	0	0		0	0	0	0	0	0	0	0	0	0	0	0	0	0	0	0		4	1	4	1	2	2
931	AC196726.2_FG001	0	0	0	0	0	0	0		0	0	0	0	0	0	0	0	0	0	0	0	0	1	0	7		1	0	0	0	0	0	0	0	0	0	0	0	0	0	0	0		4	1	5	6	2	2
932	AC196728.3_FG003	0	0	0	0	0	0	0		0	0	0	0	1	0	0	0	0	0	0	0	0	0	0	0		0	0	0	0	0	0	0	0	0	0	0	0	0	0	0	0		1	1	0	0	1	0
933	AC196779.3_FG003	0	0	0	0	0	0	0		1	0	1	0	1	0	0	0	0	0	0	1	0	0	0	0		1	0	0	0	0	2	1	1	0	0	1	0	0	0	0	0		74	28	50	31	65	31
934	AC196780.4_FG003	0	0	0	0	0	0	0		0	0	0	0	0	0	0	0	0	0	0	0	0	0	0	0		0	0	0	0	0	0	0	0	0	0	0	0	0	0	0	0		0	1	0	1	1	3
935	AC196789.3_FG001	0	0	0	0	0	0	0		0	0	0	0	0	0	0	0	0	0	0	0	0	0	0	0		0	0	0	0	0	0	0	0	0	0	0	0	0	0	0	0		6	0	3	1	4	0
936	AC196795.4_FG009	0	0	0	0	0	0	0		0	0	0	0	0	0	0	0	0	0	0	0	0	0	0	0		0	0	0	0	0	0	0	0	0	0	0	0	0	0	0	0		0	0	0	0	0	0
937	AC196954.2_FG012	0	0	0	0	0	0	0		0	0	0	0	0	0	0	0	0	0	0	0	0	0	0	0		0	0	0	0	0	0	0	0	0	0	0	0	0	0	0	0		0	0	0	0	0	0
938	AC196956.3_FG003	0	0	0	0	0	0	0		2	0	0	0	0	0	1	0	0	0	0	0	0	0	0	0		0	0	1	0	0	0	0	0	0	0	1	1	1	1	0	0		17	12	3	13	11	12
939	AC196957.3_FG005	0	0	0	0	0	0	0		1	0	0	0	0	0	0	0	0	0	0	0	0	0	0	0		0	0	2	0	0	0	0	0	0	0	2	0	1	0	0	0		2	4	3	0	0	3
940	AC196961.2_FG003	0	0	0	0	0	0	0		7	0	10	0	19	0	21	0	0	4	0	5	0	26	0	16		5	2	3	4	8	12	12	15	6	11	4	5	5	4	12	13		284	141	241	197	204	145
941	AC196961.2_FG004	0	0	0	0	0	0	0		0	0	0	0	0	0	0	0	0	0	0	0	0	0	0	0		0	0	0	0	0	0	0	0	0	0	0	0	0	0	0	0		0	0	0	0	0	0
942	AC196972.3_FG009	0	0	0	0	0	0	0		0	0	0	0	0	0	0	0	0	0	0	0	0	0	0	0		0	0	0	0	0	0	0	0	0	0	0	0	0	0	0	0		0	1	0	0	0	0
943	AC196974.3_FG008	0	0	0	0	0	0	0		0	0	0	0	0	0	0	0	0	0	0	0	0	0	0	0		0	0	0	0	0	0	0	0	0	0	0	0	0	0	0	0		2	0	3	6	0	3
944	AC196978.5_FG002	0	0	0	0	0	0	0		3	0	1	0	2	0	1	0	0	2	0	0	0	1	0	1		1	1	0	0	1	1	0	0	1	1	0	1	1	0	0	0		6	6	9	6	7	2
945	AC196978.5_FG007	0	0	1	0	0	0	0		0	0	0	0	0	0	0	0	0	0	0	0	0	0	0	0		0	0	0	0	0	0	0	0	0	0	0	0	0	0	0	0		0	6	7	7	1	11
946	AC196984.3_FG001	0	0	0	0	0	0	0		0	0	0	0	0	0	0	0	0	0	0	0	0	0	0	0		0	0	0	0	0	0	0	0	0	0	0	0	0	0	0	0		6	2	1	5	11	1
947	AC197013.3_FG003	0	0	0	0	0	0	0		0	0	0	0	0	0	0	0	0	0	0	0	0	0	0	0		0	0	0	0	0	0	0	0	0	0	0	0	0	0	0	0		57	56	74	65	67	55
948	AC197021.3_FG004	0	0	0	0	0	0	0		0	0	0	0	0	0	0	0	0	0	0	0	0	0	0	0		0	0	0	0	0	0	0	0	0	0	0	0	0	0	0	0		0	0	0	0	0	0
949	AC197029.3_FG001	0	0	0	0	0	0	0		0	0	0	0	0	0	0	0	0	0	0	0	0	0	0	0		0	0	0	0	0	0	0	0	0	0	0	0	0	0	0	0		0	0	0	0	0	0
950	AC197029.3_FG003	0	0	0	0	0	0	0		8	0	10	0	6	0	2	0	0	2	1	2	0	3	0	4		4	6	1	2	3	3	6	1	5	1	5	2	1	0	2	2		43	33	56	46	47	47
951	AC197038.3_FG001	0	0	0	0	0	0	0		0	0	0	0	0	0	0	0	0	0	0	0	0	0	0	0		0	0	0	0	0	0	0	0	0	0	0	0	0	0	0	0		1	6	4	5	0	3
952	AC197041.3_FG001	0	0	0	0	0	0	0		0	0	0	0	0	0	0	0	0	0	0	0	0	0	0	0		0	0	0	0	0	0	0	0	0	0	0	0	0	0	0	0		0	1	0	0	0	0
953	AC197047.3_FG001	0	0	0	0	0	0	0		0	0	0	0	0	0	0	0	0	0	0	0	0	0	0	0		0	0	0	0	0	0	0	0	0	0	0	0	0	0	0	0		25	4	13	8	16	9
954	AC197054.3_FG002	0	0	0	0	0	0	0		0	0	0	0	0	0	0	0	0	0	0	0	0	0	0	0		0	0	0	0	0	0	0	0	0	0	0	0	0	0	0	0		1	0	1	1	0	1
955	AC197055.3_FG003	0	0	0	0	0	0	0		0	0	0	0	0	0	0	0	0	0	0	0	0	0	0	0		0	0	0	0	0	0	0	0	0	0	0	0	0	0	0	0		0	1	1	2	0	1
956	AC197056.3_FG002	0	0	0	0	0	0	0		0	0	0	0	0	0	0	0	0	0	0	0	0	0	0	0		0	0	0	0	0	0	0	0	0	0	0	0	0	0	0	0		13	6	14	12	12	9
957	AC197056.3_FG005	0	0	0	0	0	0	0		0	0	0	0	0	0	0	0	0	0	0	0	0	0	0	0		0	0	0	0	0	0	0	0	0	0	0	0	0	0	0	0		231	245	235	269	260	222
958	AC197082.3_FG004	0	0	0	0	0	0	0		0	0	0	0	0	0	0	0	0	0	0	0	0	0	0	0		1	0	0	0	0	0	0	0	0	0	0	0	1	0	0	0		0	0	1	0	0	0
959	AC197082.3_FG005	0	0	0	0	0	0	0		0	0	0	0	0	0	0	0	0	0	0	0	0	0	0	0		0	0	0	0	0	0	0	0	0	0	0	0	0	0	0	0		0	0	0	0	0	0
960	AC197109.3_FG004	0	0	0	0	0	0	0		0	0	0	0	0	0	0	0	0	0	0	0	0	0	0	0		0	0	0	0	0	0	0	0	0	0	0	0	0	0	0	0		0	0	0	1	0	2
961	AC197118.3_FG005	0	0	0	0	0	0	0		0	0	0	0	0	0	0	0	0	0	0	0	0	0	0	0		0	0	0	0	0	0	0	0	0	0	0	0	0	0	0	0		426	360	406	381	384	319
962	AC197122.3_FG003	0	0	0	0	1	0	0		34	0	35	1	15	0	15	0	0	29	0	28	0	9	2	9		14	6	20	10	6	6	6	4	37	19	21	15	8	9	7	9		289	293	247	391	292	304
963	AC197124.3_FG002	0	0	0	0	0	0	0		0	0	0	0	0	0	0	0	0	0	0	0	0	0	0	0		0	0	1	0	0	0	0	0	0	0	0	0	0	0	0	0		0	0	0	1	1	0
964	AC197124.3_FG004	0	0	0	0	0	0	0		0	0	0	0	0	0	0	0	0	0	0	0	0	0	0	0		0	0	0	0	0	0	0	0	0	0	0	0	0	0	0	0		0	0	0	0	0	0
965	AC197140.2_FG001	0	0	0	0	0	0	0		0	0	0	0	0	0	0	0	0	0	0	0	0	0	0	0		0	0	0	0	0	0	0	0	0	0	0	0	0	0	0	0		0	0	0	0	0	0
966	AC197143.3_FG007	0	0	0	0	0	0	0		1	0	2	0	1	0	0	0	0	3	0	0	0	3	0	1		1	1	0	1	3	3	3	1	0	2	2	2	3	0	0	0		14	9	11	7	9	6
967	AC197143.3_FG010	0	0	0	0	0	0	0		0	0	0	0	0	0	0	0	0	0	0	0	0	0	0	0		0	0	0	0	0	0	0	0	0	0	0	0	0	0	0	0		0	0	1	0	0	0
968	AC197145.4_FG001	0	0	0	0	0	0	0		0	0	0	0	0	0	0	0	0	0	0	0	0	0	0	0		0	0	0	0	0	0	0	0	0	0	0	0	0	0	0	0		0	0	0	0	0	0
969	AC197146.3_FG001	0	0	0	0	1	0	0		4	0	4	0	3	0	7	0	0	2	1	1	0	6	0	9		0	4	3	1	1	8	2	3	3	2	7	6	3	2	3	7		257	202	190	218	242	170
970	AC197146.3_FG002	0	0	0	0	0	0	0		3	0	4	0	4	0	4	0	0	0	0	1	0	0	0	0		0	1	2	2	1	0	1	1	3	3	1	1	2	0	0	1		12	3	4	12	7	4
971	AC197150.3_FG003	0	0	0	0	0	0	0		27	0	15	1	11	0	8	0	1	28	0	36	0	16	0	13		12	7	13	17	7	7	6	7	16	16	13	12	6	6	9	8		62	101	71	95	56	120
972	AC197164.4_FG002	0	0	0	0	0	0	0		0	0	0	0	0	0	0	0	1	0	0	0	0	0	0	0		0	0	0	0	0	0	0	0	0	0	0	0	0	0	0	0		0	3	0	2	0	1
973	AC197230.3_FG001	0	0	0	0	0	0	0		0	0	0	0	0	0	0	0	0	0	0	0	0	0	0	0		0	0	0	0	0	0	0	0	0	0	0	0	0	0	0	0		4	10	2	10	4	13
974	AC197242.3_FG001	0	0	0	0	0	0	0		0	0	0	0	0	0	0	0	0	0	0	0	0	0	0	0		0	0	0	0	0	0	0	0	0	0	0	0	0	0	0	0		0	0	0	1	0	1
975	AC197246.3_FG001	0	0	0	0	0	0	0		24	0	26	0	38	0	45	0	1	23	0	26	0	32	1	24		14	18	11	12	24	15	19	17	11	13	17	13	18	24	22	17		551	351	508	456	449	358
976	AC197246.3_FG003	0	0	0	0	0	0	0		0	0	0	0	0	0	0	0	0	0	0	0	0	0	0	0		0	0	0	0	0	0	0	0	0	0	0	0	0	0	0	0		306	343	340	391	328	314
977	AC197265.3_FG005	0	0	0	0	0	0	0		0	0	0	0	0	0	0	0	0	0	0	0	0	0	0	0		0	0	0	0	0	0	0	0	0	0	0	0	0	0	0	0		0	1	0	0	2	0
978	AC197267.3_FG001	0	0	0	0	0	0	0		0	0	0	0	0	0	0	0	0	0	0	0	0	0	0	0		0	0	0	0	0	0	0	0	0	0	0	0	0	0	0	0		0	0	0	0	0	0
979	AC197274.4_FG010	0	0	0	0	0	0	0		0	0	0	0	2	0	3	0	0	1	0	0	1	2	0	2		2	0	0	0	3	1	2	0	0	0	2	1	2	3	2	0		31	22	21	32	31	18
980	AC197340.3_FG003	0	0	0	0	0	0	0		1	0	4	0	16	0	17	0	0	1	0	1	0	7	0	5		3	2	1	0	7	4	7	3	2	4	1	0	3	0	3	2		17	8	17	26	16	16
981	AC197340.3_FG004	0	0	0	0	0	0	0		0	0	0	0	0	0	0	0	0	0	0	0	0	0	0	0		0	0	0	0	0	1	0	0	0	0	0	0	0	0	0	0		2	1	1	3	0	3
982	AC197347.3_FG003	0	0	0	0	0	0	0		0	0	0	0	0	0	0	0	0	0	0	0	0	0	0	0		0	0	0	0	0	0	0	0	0	0	0	0	0	0	0	0		1	3	1	6	1	1
983	AC197355.3_FG001	0	0	0	0	0	0	0		0	0	0	0	0	0	0	0	0	0	0	0	0	0	0	0		0	0	0	0	0	0	0	0	0	0	0	0	0	0	0	0		5	5	9	5	5	4
984	AC197373.4_FG005	0	0	0	0	0	0	0		0	0	0	0	0	0	0	0	0	0	0	0	0	0	0	0		0	0	0	0	0	0	0	0	0	0	0	0	0	0	0	0		18	19	15	13	20	16
985	AC197376.3_FG001	0	0	0	0	0	0	0		0	0	0	0	0	0	0	0	0	0	0	0	0	0	0	0		0	0	0	0	0	0	0	0	0	0	0	0	0	0	0	0		0	1	0	1	0	1
986	AC197377.3_FG001	0	0	0	0	0	0	0		0	0	0	0	0	0	0	0	0	0	0	0	0	0	0	0		0	0	0	0	0	0	0	0	0	0	0	0	0	0	0	0		1	0	0	0	3	0
987	AC197377.3_FG004	0	0	0	0	0	0	0		0	0	0	0	0	0	0	0	0	0	0	0	0	0	0	0		0	0	0	0	0	0	0	0	0	0	0	0	0	0	0	0		0	1	1	0	0	0
988	AC197387.3_FG004	0	0	0	0	0	0	0		0	0	0	0	0	0	0	0	0	0	0	0	0	0	0	0		2	0	0	0	0	0	0	0	1	0	0	0	0	0	0	0		5	1	3	1	0	0
989	AC197427.3_FG003	0	0	1	0	0	0	0		0	0	0	0	0	0	0	0	0	0	0	0	0	0	0	0		0	0	0	0	0	0	0	0	0	0	0	0	0	0	0	0		0	1	0	0	0	1
990	AC197432.4_FG001	0	0	0	0	0	0	0		0	0	1	0	0	0	0	0	0	0	0	0	0	0	0	0		0	0	1	0	0	0	0	0	1	0	0	0	1	0	1	0		3	1	1	2	3	0
991	AC197477.3_FG002	0	0	0	0	0	0	0		0	0	0	0	0	0	0	0	0	0	0	0	0	0	0	0		0	0	0	0	0	0	0	0	0	0	0	0	0	0	0	0		1	1	3	2	0	3
992	AC197526.3_FG003	0	0	0	0	0	0	0		0	0	0	0	0	0	0	0	0	0	0	0	0	0	0	0		0	0	0	0	0	0	0	0	0	0	0	0	0	0	0	0		2	3	2	2	1	2
993	AC197541.3_FG009	0	0	0	0	0	0	0		0	0	0	0	0	0	0	0	0	0	0	0	0	0	0	0		0	0	0	0	0	0	0	0	0	0	0	0	0	0	0	0		11	6	11	11	13	6
994	AC197544.3_FG002	0	0	0	0	0	0	0		0	0	0	0	0	0	0	0	0	0	0	0	0	0	0	0		0	0	0	0	0	0	0	0	0	0	0	0	0	0	0	0		0	1	2	1	1	0
995	AC197545.3_FG002	0	0	0	0	0	1	0		64	0	50	0	21	0	15	0	0	27	1	25	0	16	0	19		22	18	25	24	10	12	11	4	30	22	38	22	8	3	9	7		367	393	333	347	322	320
996	AC197555.3_FG008	0	0	0	0	1	0	0		118	1	98	1	131	0	123	0	0	101	0	84	0	125	0	123		56	69	47	56	82	91	72	92	69	64	42	70	65	84	74	76		370	250	342	328	317	199
997	AC197575.3_FG008	0	0	0	0	0	0	0		0	0	1	0	0	0	0	0	0	0	0	0	0	0	0	0		0	0	0	0	0	0	0	0	0	0	0	0	0	0	0	0		0	1	0	0	1	0
998	AC197577.2_FG002	0	0	0	0	0	0	0		0	0	0	0	0	0	0	0	0	0	0	0	0	0	0	0		0	0	0	0	0	0	0	0	0	0	0	0	0	0	0	0		0	0	1	0	0	0
999	AC197578.4_FG001	0	0	0	0	0	0	0		0	0	0	0	0	0	0	0	0	0	0	0	0	0	0	0		0	0	0	0	0	0	0	0	0	0	0	0	0	0	0	0		92	105	85	131	83	103
1000	AC197583.2_FG003	0	0	0	0	0	0	0		0	0	0	0	0	0	0	0	0	0	0	0	0	0	0	0		0	0	0	0	0	0	0	0	0	0	0	0	0	0	0	0		0	0	1	0	0	0
1001	AC197595.3_FG001	0	0	0	0	0	0	0		0	0	0	0	0	0	0	0	0	0	0	0	0	0	0	0		0	0	0	0	0	0	0	0	0	0	0	0	0	0	0	0		0	1	0	0	0	1
1002	AC197672.3_FG002	0	0	0	0	1	1	1		158	0	168	0	87	0	98	0	2	88	1	123	0	79	0	75		83	51	84	76	47	44	39	23	132	93	77	63	60	23	64	48		4197	3499	3827	4495	4122	3451
1003	AC197697.3_FG001	0	0	0	0	0	0	0		0	0	0	0	0	0	0	0	0	0	0	0	0	0	0	0		0	0	0	0	0	0	0	0	0	0	0	0	0	0	0	0		0	0	0	0	0	0
1004	AC197699.3_FG002	0	0	0	0	1	1	1		6	0	4	0	2	0	3	0	1	1	1	2	0	1	0	0		1	0	2	0	5	0	1	1	6	0	3	0	1	1	0	1		18	12	5	15	15	7
1005	AC197699.3_FG003	0	0	0	0	0	1	0		45	2	32	0	59	0	45	0	0	29	1	40	1	51	0	62		13	23	25	20	41	33	50	35	30	26	28	19	32	23	52	28		176	173	139	207	147	181
1006	AC197699.3_FG005	0	0	0	0	0	0	0		0	0	0	0	0	0	0	0	0	0	0	0	0	0	0	0		0	0	0	0	0	0	0	0	0	0	0	0	0	0	0	0		0	0	0	0	0	0
1007	AC197699.3_FG006	0	0	0	0	0	0	0		1	0	1	0	1	0	1	0	1	0	0	0	0	0	0	0		2	0	0	0	1	0	0	0	2	0	0	0	1	0	0	0		1	1	2	2	2	2
1008	AC197699.3_FG008	0	0	0	0	0	0	0		0	0	0	0	0	0	0	0	0	0	0	0	0	0	0	0		0	0	0	0	1	0	0	0	0	0	0	0	0	0	0	0		0	3	2	3	0	2
1009	AC197699.3_FG009	0	0	0	0	0	0	0		0	0	0	0	0	0	0	0	0	0	0	0	0	0	0	0		0	0	0	0	0	0	0	0	0	0	0	0	0	0	0	0		0	0	0	0	0	0
1010	AC197699.3_FG010	0	0	0	0	0	0	0		0	0	0	0	0	0	0	0	0	0	0	0	0	0	0	0		0	0	0	0	0	0	0	0	0	0	0	0	0	0	0	0		0	0	0	0	0	0
1011	AC197705.4_FG001	0	0	0	1	0	0	0		2	0	1	0	0	0	2	0	0	10	0	7	0	23	1	28		4	1	7	10	3	2	2	3	16	10	4	1	2	3	4	2		8	48	24	113	7	39
1012	AC197705.4_FG003	0	0	0	0	0	0	0		8	0	5	0	35	1	2	0	0	9	0	23	1	27	0	57		3	4	0	1	3	5	4	1	0	0	0	0	4	6	3	0		18	32	37	7	18	90
1013	AC197705.4_FG004	0	0	0	0	0	0	0		0	1	0	0	2	0	4	0	0	0	0	0	0	0	0	1		1	1	0	0	0	0	0	2	0	1	2	0	1	0	1	0		5	4	11	8	5	1
1014	AC197705.4_FG006	0	0	0	0	1	1	1		92	1	77	1	122	0	115	0	0	55	1	54	1	70	0	76		38	30	32	42	72	38	68	38	41	43	40	29	63	46	64	44		347	290	289	316	324	248
1015	AC197705.4_FG007	0	0	0	0	0	0	0		9	0	11	0	21	0	27	0	0	9	0	13	0	26	0	22		6	7	4	7	10	15	10	11	17	16	6	5	15	21	12	15		800	765	816	853	751	622
1016	AC197705.4_FG008	0	0	0	0	0	0	0		1	0	0	0	0	0	1	0	1	0	1	0	0	0	0	0		0	0	0	1	0	0	0	0	1	0	0	0	0	0	0	1		6	5	3	3	3	2
1017	AC197705.4_FG011	0	0	0	0	0	0	0		7	0	5	0	1	0	3	0	0	2	0	3	0	4	0	1		3	0	2	2	1	1	0	0	4	2	1	1	1	0	0	1		178	196	181	209	184	159
1018	AC197714.3_FG004	0	0	0	0	0	0	0		0	0	0	0	0	0	0	0	0	0	0	0	0	0	0	0		0	0	0	0	0	0	0	0	0	0	0	0	0	0	0	0		51	49	38	41	31	52
1019	AC197717.3_FG002	0	0	0	0	1	1	1		56	0	70	0	88	0	93	0	1	32	0	21	0	76	1	60		23	14	38	15	75	41	73	41	57	28	35	17	58	34	64	39		313	172	264	302	301	155
1020	AC197718.3_FG002	0	0	0	0	0	0	0		0	0	0	0	0	0	0	0	0	0	0	0	0	0	0	0		0	0	0	0	0	0	0	0	0	0	0	0	0	0	0	0		0	1	0	0	0	2
1021	AC197738.3_FG007	0	0	0	0	0	0	0		0	0	0	0	0	0	0	0	0	0	0	0	0	0	0	0		0	0	0	0	0	0	0	0	0	0	0	0	0	0	0	0		0	0	0	0	0	0
1022	AC197757.3_FG002	0	0	0	0	0	0	0		0	0	0	0	0	0	0	0	0	0	0	0	0	0	0	0		0	0	0	0	0	0	0	0	0	0	0	0	0	0	0	0		0	0	0	0	1	0
1023	AC197757.3_FG003	0	0	0	0	0	0	0		0	0	0	0	0	0	0	0	0	0	0	0	0	0	0	0		0	0	0	0	0	0	0	0	0	0	0	0	0	0	0	0		0	0	0	0	0	0
1024	AC197758.3_FG004	0	0	0	0	1	1	1		80	0	57	0	61	0	62	0	0	6	0	6	0	8	1	7		33	3	36	4	37	2	41	2	33	6	50	2	49	6	32	6		763	91	272	376	551	69
1025	AC197764.4_FG003	0	0	0	0	0	0	0		0	0	0	0	0	0	0	0	0	0	0	0	0	0	0	0		0	0	0	0	0	0	0	0	0	0	0	0	0	0	0	0		12	5	8	6	4	4
1026	AC197770.3_FG002	0	0	0	0	0	0	0		0	0	0	0	0	0	0	0	0	0	0	0	0	0	0	0		0	0	0	0	0	0	0	0	0	0	0	0	0	0	0	0		2	3	5	4	0	4
1027	AC197771.3_FG001	0	0	0	0	0	0	0		0	0	0	0	0	0	0	0	0	0	0	0	0	0	0	0		0	0	0	0	0	0	0	0	0	0	0	0	0	0	0	0		4	0	1	0	0	0
1028	AC197783.3_FG005	0	0	0	0	0	0	0		0	0	0	0	0	0	0	0	0	0	0	0	0	0	0	0		0	0	0	0	0	0	0	0	0	0	0	0	0	0	0	0		0	2	0	0	0	1
1029	AC197835.3_FG001	0	0	0	0	0	0	0		0	0	0	0	0	0	0	0	0	0	0	0	0	0	0	0		0	0	0	0	0	0	0	0	0	0	0	0	0	0	0	0		0	1	1	0	0	1
1030	AC197837.3_FG003	0	0	0	0	0	0	0		0	0	0	0	0	0	0	0	0	0	0	0	0	0	0	0		0	0	0	0	0	0	0	0	0	0	0	0	0	0	0	0		1	1	0	1	1	2
1031	AC197901.3_FG003	0	0	0	0	0	0	0		0	0	0	0	0	0	0	0	0	0	0	0	0	0	0	0		0	0	0	0	0	0	0	0	0	0	0	0	0	0	0	0		0	0	0	0	0	0
1032	AC197903.4_FG001	0	0	0	0	0	0	0		0	0	0	0	0	0	0	0	0	0	0	0	0	1	1	0		0	0	0	0	0	0	0	0	0	0	0	0	0	0	0	0		1	1	0	0	0	1
1033	AC197909.3_FG002	0	0	0	0	0	0	0		0	0	0	0	0	0	0	0	0	0	0	0	0	0	0	0		0	0	0	0	0	0	0	0	0	0	0	0	0	0	0	0		2	1	4	0	0	0
1034	AC198019.2_FG004	0	0	0	0	0	0	0		0	0	0	0	0	0	0	0	0	0	0	0	0	0	0	0		0	0	0	0	0	0	0	0	0	0	0	0	0	0	0	0		0	0	0	0	0	1
1035	AC198025.3_FG001	0	0	0	0	0	0	0		0	0	0	0	1	0	0	0	0	0	0	0	0	0	0	0		0	0	0	1	0	0	0	0	0	0	0	0	0	0	0	0		4	3	1	1	1	3
1036	AC198081.2_FG001	0	0	0	0	0	0	0		0	0	0	0	0	0	0	0	0	0	0	0	0	0	0	0		0	0	0	0	0	0	0	0	0	0	0	0	0	0	0	0		2	1	2	0	0	0
1037	AC198081.2_FG005	0	0	0	0	0	0	0		0	0	0	0	0	0	0	0	0	0	0	0	0	0	0	0		0	0	0	0	0	0	0	0	0	0	0	0	0	0	0	0		1	1	0	0	0	0
1038	AC198122.3_FG002	0	0	0	0	0	0	0		0	0	0	0	0	0	0	0	0	0	0	0	0	0	0	0		0	0	1	0	0	0	0	0	0	0	0	0	0	0	0	0		0	2	1	1	0	2
1039	AC198169.4_FG004	0	0	0	0	0	0	0		32	1	38	0	28	0	36	0	0	27	0	24	0	48	0	47		12	12	12	15	24	33	26	22	23	17	11	12	28	27	21	26		398	342	344	447	359	285
1040	AC198174.4_FG001	0	0	0	0	0	0	0		0	0	0	0	0	0	0	0	0	0	0	0	0	0	0	0		0	0	0	0	0	0	0	0	0	0	0	0	0	0	0	0		0	2	1	1	0	0
1041	AC198179.4_FG001	0	0	0	0	0	0	0		0	0	0	0	0	0	0	0	0	0	0	0	0	0	0	0		0	0	0	0	0	0	0	0	0	0	0	0	0	0	0	0		85	52	68	50	67	46
1042	AC198179.4_FG002	0	0	0	0	0	0	0		0	0	0	0	0	0	0	0	0	0	0	0	0	0	0	0		0	0	0	0	0	0	0	0	0	0	0	0	0	0	0	0		0	0	0	0	0	0
1043	AC198206.5_FG001	0	0	0	0	0	0	0		8	0	11	0	4	0	5	0	0	2	0	0	1	4	1	8		3	10	2	2	3	4	4	5	5	4	1	4	6	2	3	4		180	145	197	175	205	129
1044	AC198208.3_FG002	0	0	0	0	0	0	0		0	0	0	0	0	0	0	0	0	0	0	0	0	0	0	0		0	0	0	0	0	0	0	0	0	0	0	0	0	0	0	0		0	1	0	0	0	0
1045	AC198223.3_FG001	0	0	0	0	0	0	0		0	0	0	0	0	0	0	0	0	0	0	0	0	0	0	0		0	0	0	0	0	0	0	0	0	0	0	0	0	0	0	0		2	0	1	0	2	1
1046	AC198229.4_FG002	0	0	0	0	0	0	0		0	0	0	0	0	0	0	0	0	0	0	0	0	0	0	0		0	0	0	0	0	0	0	0	0	0	0	0	0	0	0	0		1	2	0	1	0	0
1047	AC198230.4_FG003	0	0	0	0	0	0	0		0	0	0	0	0	0	0	0	0	0	0	0	0	0	0	0		0	0	0	0	0	0	0	0	0	0	0	0	0	0	0	0		0	0	0	0	0	0
1048	AC198291.3_FG001	0	0	0	0	0	0	0		0	0	0	0	0	0	0	0	0	0	0	0	0	0	0	0		0	0	0	0	0	0	0	0	0	0	0	0	0	0	0	0		4	4	2	4	5	4
1049	AC198324.3_FG003	0	0	0	0	0	0	0		0	0	0	0	0	0	0	0	0	0	0	0	0	0	0	0		0	0	0	0	0	0	0	0	0	0	0	0	0	0	0	0		1	2	2	0	2	1
1050	AC198352.4_FG005	0	0	0	0	0	0	0		0	0	0	0	0	0	0	0	0	0	0	0	0	0	0	0		0	0	0	0	0	0	0	0	0	0	0	0	0	0	0	0		8	5	5	5	10	4
1051	AC198353.5_FG001	0	0	0	0	0	0	0		0	0	0	0	0	0	0	0	0	0	0	0	0	0	0	0		0	0	0	0	0	0	0	0	0	0	0	0	0	0	0	0		4	3	1	3	2	3
1052	AC198353.5_FG004	0	0	0	0	0	0	0		0	0	0	0	0	0	0	0	0	0	0	0	0	0	0	0		0	0	0	0	0	0	0	0	0	0	0	0	0	0	0	0		51	59	63	61	58	61
1053	AC198357.3_FG002	0	0	0	0	0	0	0		0	0	1	0	0	0	0	0	2	0	0	0	0	0	0	0		0	0	0	0	1	0	0	0	0	0	0	0	0	0	0	0		4	2	0	0	1	2
1054	AC198361.3_FG004	0	0	0	0	0	0	0		0	0	0	0	0	0	0	0	0	0	0	0	0	0	0	0		0	0	0	0	0	0	0	0	0	0	0	0	0	0	0	0		879	771	823	743	711	638
1055	AC198366.3_FG004	0	0	0	0	0	0	0		0	0	0	0	0	0	0	0	0	0	0	0	0	0	0	0		0	0	0	0	0	0	0	0	0	0	0	0	0	0	0	0		19	6	14	13	8	13
1056	AC198371.3_FG003	0	0	0	0	0	0	0		0	0	0	0	0	0	0	0	0	0	0	0	0	0	0	0		0	0	0	0	0	0	0	0	0	0	0	0	0	0	0	0		0	0	1	1	2	0
1057	AC198371.3_FG011	0	0	0	0	0	0	0		0	0	0	0	0	0	0	0	0	2	0	2	1	3	0	0		0	0	1	0	0	0	0	0	0	0	0	0	0	0	1	0		0	2	0	0	1	3
1058	AC198379.3_FG006	0	0	0	0	0	0	0		0	0	0	0	0	0	0	0	0	0	0	0	0	0	0	0		0	0	0	0	0	0	0	0	0	0	0	0	0	0	0	0		0	1	0	0	0	0
1059	AC198380.3_FG001	0	0	1	0	0	0	0		0	0	0	0	0	0	0	0	0	0	0	0	0	0	0	0		0	0	0	0	0	0	0	0	0	0	0	0	0	0	0	0		0	14	9	10	0	11
1060	AC198382.3_FG001	0	0	0	0	0	0	0		0	0	1	0	0	0	1	0	0	0	0	0	0	0	0	0		0	0	0	0	0	0	0	0	0	0	0	0	0	0	0	0		4	0	1	3	3	0
1061	AC198386.3_FG001	0	0	0	0	0	0	0		0	0	0	0	0	0	0	0	0	0	0	0	0	0	0	0		0	0	0	0	0	0	0	0	0	0	0	0	0	0	0	0		2	1	3	2	4	2
1062	AC198393.3_FG001	0	0	0	0	0	0	0		0	0	0	0	0	0	0	0	0	0	0	0	0	0	0	0		0	0	0	0	0	0	0	0	0	0	0	0	0	0	0	0		0	0	1	1	0	1
1063	AC198398.3_FG003	0	0	0	0	0	0	0		0	0	0	0	0	0	0	0	0	0	0	0	0	0	1	0		0	0	0	0	0	0	0	0	1	0	0	0	0	0	0	0		8	6	7	14	7	8
1064	AC198403.3_FG001	0	0	0	0	0	0	0		27	0	20	0	27	0	35	0	0	9	0	8	0	17	0	24		24	22	14	8	27	32	20	23	18	17	14	7	16	18	20	16		89	44	150	81	79	44
1065	AC198414.2_FG001	0	0	0	0	0	0	0		0	0	0	0	0	0	0	0	0	0	0	0	0	0	0	0		0	0	0	0	0	0	0	0	0	0	0	0	0	0	0	0		2	0	5	9	7	2
1066	AC198418.3_FG005	0	0	0	0	0	0	0		18	0	36	1	19	0	25	0	2	36	1	22	1	47	0	30		13	15	13	11	23	17	19	15	23	20	20	18	17	22	24	13		122	219	152	217	153	196
1067	AC198421.3_FG003	0	1	0	0	0	0	0		0	0	0	0	0	0	0	0	0	0	0	0	0	0	0	0		0	0	0	0	0	0	0	0	0	0	0	0	0	0	0	0		15	0	8	3	11	0
1068	AC198479.3_FG007	0	0	0	0	0	0	0		0	0	0	0	0	0	0	0	0	0	0	0	0	0	0	0		0	0	0	0	0	0	0	0	0	0	0	0	0	0	0	0		0	0	1	1	1	0
1069	AC198481.3_FG004	0	0	0	0	0	0	0		12	0	9	0	10	0	3	0	0	10	0	17	0	18	0	9		9	7	8	11	12	5	6	3	12	11	5	2	5	5	6	7		835	1101	816	1168	901	1108
1070	AC198490.3_FG003	0	0	0	0	0	0	0		9	0	5	0	0	0	0	0	0	7	1	18	0	2	0	5		2	4	5	3	0	1	1	2	2	7	3	5	1	1	1	3		11	23	15	17	10	28
1071	AC198494.3_FG002	0	0	0	0	0	0	0		0	0	0	0	0	0	0	0	0	0	0	0	0	0	0	0		0	0	0	0	0	0	0	0	1	0	0	0	0	0	0	0		3	1	3	4	0	2
1072	AC198506.3_FG001	0	0	0	0	0	0	0		0	0	0	0	0	0	0	0	0	0	0	0	0	0	0	0		0	0	0	0	0	0	0	0	0	0	0	1	0	0	0	0		0	0	0	3	4	1
1073	AC198509.3_FG004	0	0	0	0	0	0	0		0	0	0	0	1	0	0	0	0	0	0	0	0	0	0	0		0	0	0	0	0	0	1	0	0	0	0	0	0	0	0	0		5	3	1	2	3	2
1074	AC198509.3_FG005	0	0	1	0	0	0	0		0	0	0	0	0	0	0	0	0	0	0	2	0	2	0	2		0	0	0	1	0	2	1	1	0	3	0	0	0	3	0	0		0	3	3	8	0	7
1075	AC198510.5_FG002	0	0	0	0	0	0	0		0	0	0	0	0	0	0	0	0	0	0	0	0	0	0	0		0	0	0	0	0	0	0	0	0	0	0	0	0	0	0	0		0	2	0	0	0	1
1076	AC198515.3_FG011	0	0	0	0	0	0	0		0	0	0	0	0	0	0	0	0	0	0	0	0	0	0	0		0	0	0	0	0	0	0	0	0	0	0	0	0	0	0	0		7	8	5	2	1	2
1077	AC198518.3_FG002	0	0	0	0	0	0	0		0	0	0	0	0	0	0	0	0	0	0	0	0	0	0	0		0	0	0	0	0	0	0	0	0	0	0	0	0	0	0	0		15	15	9	5	16	13
1078	AC198518.3_FG003	0	0	0	0	0	0	0		1	0	0	0	0	0	0	0	0	2	0	0	0	0	0	0		1	0	0	0	0	0	0	0	0	0	0	0	0	0	0	0		606	608	572	548	526	571
1079	AC198518.3_FG005	0	0	0	0	0	0	0		0	0	0	0	0	0	0	0	0	0	0	0	0	0	0	0		0	0	0	0	0	0	0	0	0	0	0	0	0	0	0	0		0	0	0	0	0	0
1080	AC198597.4_FG001	0	0	0	0	0	0	0		0	0	0	0	0	0	0	0	0	0	0	0	0	0	0	0		0	0	0	0	0	0	0	0	0	0	0	0	0	0	0	0		1	3	2	1	0	3
1081	AC198605.3_FG005	0	0	0	0	0	0	0		0	0	0	0	0	0	0	0	0	0	0	0	0	0	0	0		0	0	0	0	0	0	0	0	0	0	0	0	0	0	0	0		0	0	3	4	0	1
1082	AC198691.3_FG005	0	0	0	0	0	0	0		0	0	0	0	0	0	1	0	0	0	0	0	0	0	0	0		0	0	1	0	0	0	0	0	0	0	0	0	0	0	0	0		0	2	0	1	0	1
1083	AC198699.3_FG004	0	0	1	0	0	0	0		0	0	0	0	0	0	0	0	0	0	0	0	0	0	0	0		0	0	0	0	0	0	0	0	0	0	0	0	0	0	0	0		0	11	5	8	0	10
1084	AC198700.2_FG004	0	0	0	0	0	0	0		1	0	3	0	0	0	2	0	0	0	0	0	0	3	0	1		0	0	0	1	0	2	1	1	2	1	0	1	0	0	0	1		4	4	2	10	5	3
1085	AC198721.3_FG002	0	0	0	0	0	0	0		0	0	0	0	0	0	0	0	0	0	0	0	0	0	0	0		0	0	0	0	0	0	0	0	0	0	0	0	0	0	0	0		0	1	1	1	2	1
1086	AC198723.4_FG002	0	0	0	0	0	0	0		0	0	0	0	0	0	0	0	0	0	0	0	0	0	0	0		0	0	0	0	0	0	0	0	0	0	0	0	0	0	0	0		0	0	0	0	0	0
1087	AC198723.4_FG003	0	0	0	0	0	0	0		0	0	0	0	0	0	0	0	0	0	0	0	0	0	0	0		0	0	0	0	0	0	0	0	0	0	0	0	0	0	0	0		1	0	0	0	0	0
1088	AC198725.4_FG004	0	0	0	0	0	0	0		12	1	16	1	24	0	23	0	1	13	2	18	0	19	0	26		13	11	9	8	16	15	15	10	15	11	14	8	24	16	13	11		42	46	75	64	42	48
1089	AC198725.4_FG007	0	0	0	0	1	0	0		46	0	61	0	28	0	32	0	1	51	2	35	1	22	1	37		17	18	33	23	18	12	29	10	31	46	18	16	32	9	32	24		448	515	447	608	479	537
1090	AC198725.4_FG009	0	0	0	0	1	0	0		7	1	4	0	5	0	4	0	0	3	0	2	0	4	0	2		1	2	5	0	3	0	2	0	1	0	3	1	2	1	3	1		48	26	23	31	26	16
1091	AC198743.3_FG008	0	0	0	0	0	0	0		0	0	0	0	0	0	0	0	0	0	0	0	0	0	0	0		0	0	0	0	0	0	0	0	0	0	0	0	0	0	0	0		0	0	0	0	0	0
1092	AC198744.3_FG004	0	0	0	0	0	0	0		0	0	0	0	0	0	0	0	0	0	0	0	0	0	0	0		0	0	0	0	0	0	0	0	0	0	0	0	0	0	0	0		0	3	2	0	0	2
1093	AC198752.4_FG004	0	0	1	0	1	0	0		0	0	0	0	0	0	0	0	0	7	0	1	0	4	0	6		1	2	0	1	0	4	0	5	0	5	0	0	0	1	0	0		1	17	11	8	0	9
1094	AC198766.3_FG005	0	0	0	0	0	0	0		0	0	0	0	0	0	0	0	0	0	0	0	0	0	0	0		0	0	0	0	0	0	0	0	0	0	0	0	0	0	0	0		0	2	2	1	0	2
1095	AC198773.3_FG003	0	0	0	0	0	0	0		0	0	0	0	0	0	0	0	0	0	0	0	0	0	0	0		0	0	0	0	0	0	0	0	0	0	0	0	0	0	0	0		0	0	1	1	0	2
1096	AC198781.3_FG002	0	0	0	0	0	0	0		0	0	0	0	0	0	0	0	0	0	0	0	0	0	0	0		0	0	0	0	0	0	0	0	0	0	0	0	0	0	0	0		0	0	0	0	0	0
1097	AC198787.3_FG001	0	0	0	0	0	0	0		0	0	0	0	0	0	0	0	0	0	0	0	0	0	0	0		0	0	0	0	0	0	0	0	0	0	0	0	0	0	0	0		0	0	0	0	0	0
1098	AC198787.3_FG004	0	0	0	0	0	0	0		0	0	0	0	0	0	0	0	0	0	0	0	0	0	0	0		0	0	0	0	0	0	0	0	0	0	0	0	0	0	0	0		0	1	2	2	0	0
1099	AC198787.3_FG009	0	0	0	0	0	0	0		0	0	0	0	0	0	0	0	0	0	0	0	0	0	0	0		0	0	0	0	0	0	0	0	0	0	0	0	0	0	0	0		0	2	0	0	0	2
1100	AC198871.3_FG002	0	0	0	0	0	0	0		0	0	0	0	0	0	0	0	0	0	0	0	0	0	0	0		0	0	0	0	0	0	0	0	0	0	0	0	0	0	0	0		2	1	1	2	0	3
1101	AC198901.4_FG004	0	0	0	0	0	0	0		2	0	2	0	0	0	0	0	0	0	0	0	0	0	0	0		3	0	1	0	0	0	0	0	1	0	0	0	1	0	0	0		2	0	4	2	3	0
1102	AC198923.4_FG002	0	0	0	0	0	0	0		0	0	0	0	0	0	0	0	0	0	0	0	0	0	0	0		0	0	0	0	0	0	0	0	0	0	0	0	0	0	0	0		176	86	134	80	169	93
1103	AC198937.4_FG003	0	0	0	0	0	0	0		16	0	9	0	15	0	13	0	0	16	0	8	0	18	0	15		2	3	0	5	3	8	6	4	2	6	4	8	4	1	4	4		65	70	31	57	51	55
1104	AC198937.4_FG005	0	0	0	0	0	0	0		0	0	0	0	0	0	0	0	0	1	0	0	0	0	0	1		0	0	0	0	0	0	0	0	0	2	0	0	0	0	0	0		4	2	4	7	5	5
1105	AC198940.4_FG008	0	0	0	0	0	0	0		0	0	0	0	0	0	0	0	0	0	0	0	0	0	0	0		0	0	0	0	0	0	0	0	0	0	0	0	0	0	0	0		1	5	1	0	1	3
1106	AC198979.4_FG009	0	0	0	0	0	0	0		0	0	0	0	0	0	0	0	0	0	0	0	0	0	0	0		0	0	0	0	0	0	0	0	0	0	0	0	0	0	0	0		1	1	1	0	1	0
1107	AC198981.4_FG001	0	0	0	0	0	0	0		0	0	0	0	0	0	0	0	0	0	0	0	0	0	0	0		0	0	0	0	0	0	0	0	0	0	0	0	0	0	0	0		1	1	0	1	0	0
1108	AC198982.3_FG006	0	0	0	0	0	0	0		0	0	0	0	0	0	0	0	0	0	0	0	0	0	0	0		0	0	0	0	0	0	0	0	0	0	0	0	0	0	0	0		22	35	24	22	24	26
1109	AC198993.3_FG004	0	0	0	0	0	0	0		0	0	0	0	0	0	0	0	0	0	0	0	0	0	0	0		0	0	0	0	0	0	0	0	0	0	0	0	0	0	0	0		3	2	2	3	1	2
1110	AC198995.3_FG003	0	0	0	0	0	0	0		0	0	0	0	0	0	0	0	0	0	0	0	0	0	0	0		0	0	0	0	0	0	0	0	0	0	0	0	0	0	0	0		0	0	0	0	0	0
1111	AC199001.3_FG005	0	0	0	0	0	0	0		37	1	40	0	46	0	69	0	0	29	0	26	1	58	1	35		17	23	12	14	32	30	36	38	26	24	20	9	34	22	34	35		431	337	369	485	387	290
1112	AC199005.2_FG003	0	0	0	0	0	0	0		0	0	0	0	0	0	0	0	0	0	0	0	0	0	0	0		0	0	0	0	0	0	0	0	0	0	0	0	0	0	0	0		0	0	0	0	0	0
1113	AC199039.3_FG003	0	0	0	0	0	0	0		0	0	0	0	1	0	0	0	1	0	0	1	0	1	0	2		0	0	0	2	0	1	0	3	0	0	0	0	0	1	0	2		1	1	3	1	1	3
1114	AC199043.2_FG002	0	0	0	0	0	0	0		0	0	0	0	0	0	0	0	0	0	0	0	0	0	0	0		0	0	0	0	0	0	0	0	0	0	0	0	0	0	0	0		13	17	14	22	12	17
1115	AC199054.3_FG003	0	0	0	0	0	0	0		0	0	0	0	0	0	0	0	0	0	0	0	0	0	0	0		0	0	0	0	0	0	0	0	0	0	0	0	0	0	0	0		1	0	0	0	0	0
1116	AC199054.3_FG007	0	0	0	0	0	0	0		0	0	0	0	0	0	1	0	0	0	0	0	1	0	0	0		0	0	1	0	0	0	1	0	0	0	0	0	0	0	0	0		6	3	5	5	5	1
1117	AC199058.2_FG001	0	0	0	0	1	1	1		30	0	26	1	6	0	5	0	0	16	0	14	0	6	0	5		14	9	12	6	9	0	8	2	20	7	16	6	4	1	6	3		54	25	40	40	44	24
1118	AC199067.2_FG004	0	0	0	0	0	0	0		0	0	0	0	0	0	0	0	0	0	0	0	0	0	0	0		0	0	0	0	0	0	0	0	0	0	0	0	0	0	0	0		37	19	46	31	47	24
1119	AC199068.2_FG017	0	0	0	0	1	1	1		31	0	35	0	46	1	39	0	1	44	0	44	0	84	0	86		21	25	11	19	28	50	21	36	19	27	18	31	25	38	23	25		90	136	126	132	89	124
1120	AC199084.3_FG004	0	0	0	0	0	0	0		0	0	0	0	0	0	0	0	0	0	0	0	0	0	0	0		0	0	0	0	0	0	0	0	0	0	0	0	0	0	0	0		0	0	0	0	0	0
1121	AC199175.2_FG003	0	0	0	0	0	0	0		0	0	0	0	0	0	0	0	0	0	0	0	0	0	0	0		0	0	0	0	0	0	0	0	0	0	0	0	0	0	0	0		0	1	1	1	0	0
1122	AC199175.2_FG006	0	0	0	0	0	0	0		0	0	0	0	0	0	0	0	0	0	0	0	0	0	0	0		0	0	0	0	0	0	0	0	0	0	0	0	0	0	0	0		4	4	3	4	3	2
1123	AC199182.3_FG003	0	0	0	0	0	0	0		0	0	0	0	0	0	0	0	0	0	0	0	0	0	0	0		0	0	0	0	0	0	0	0	0	0	0	0	0	0	0	0		0	0	0	0	0	0
1124	AC199183.3_FG001	0	0	0	0	0	0	0		0	0	0	0	0	0	0	0	0	0	0	0	1	0	0	0		0	1	1	0	0	0	1	0	0	0	0	0	0	0	0	0		3	4	2	2	2	0
1125	AC199194.3_FG002	0	0	0	0	0	0	0		0	0	0	0	0	0	0	0	0	0	0	0	0	0	0	0		0	0	0	0	0	0	0	0	0	0	0	0	0	0	0	0		0	0	0	0	0	0
1126	AC199198.3_FG002	0	0	0	0	0	0	0		0	0	0	0	0	0	0	0	0	0	0	0	0	0	0	0		0	0	0	0	0	0	0	0	0	0	0	0	0	0	0	0		1	0	0	0	0	0
1127	AC199198.3_FG003	0	0	0	0	0	0	0		0	0	0	0	0	0	0	0	1	0	0	4	0	1	0	2		0	0	0	0	0	0	0	0	0	0	0	0	0	0	0	0		0	1	0	0	0	4
1128	AC199204.3_FG002	0	0	0	0	0	0	0		0	0	0	0	0	0	0	0	0	0	0	0	0	0	0	0		0	0	0	0	0	0	0	0	0	0	0	0	0	0	0	0		0	0	0	0	0	0
1129	AC199217.3_FG004	0	0	0	0	0	0	0		0	0	0	0	0	0	0	0	0	0	0	0	0	0	0	0		0	0	0	0	0	0	0	0	0	0	0	0	0	0	0	0		1	0	0	0	0	1
1130	AC199315.4_FG001	0	0	0	0	0	0	0		0	0	0	0	0	0	0	0	0	0	0	0	0	0	0	0		0	0	0	0	0	0	0	0	0	0	0	0	0	0	0	0		186	233	201	230	145	202
1131	AC199315.4_FG002	0	0	0	0	0	0	0		0	0	0	0	0	0	0	0	0	0	0	0	0	0	0	0		0	0	0	0	0	0	0	0	0	0	0	0	0	0	0	0		0	0	0	0	0	0
1132	AC199325.3_FG001	0	0	0	0	0	0	0		1	0	0	0	0	0	0	0	0	0	0	0	1	0	0	0		0	0	0	0	0	0	0	0	1	0	0	0	0	0	0	0		5	4	4	5	5	6
1133	AC199325.3_FG005	0	0	0	0	0	0	0		0	0	0	0	0	0	0	0	0	0	0	0	0	0	0	0		0	0	0	0	0	0	0	0	0	0	0	0	0	0	0	0		1	1	0	1	0	2
1134	AC199335.3_FG002	0	0	0	0	0	0	0		0	0	0	0	0	0	0	0	0	0	0	0	0	0	0	0		0	0	0	0	0	0	0	0	0	0	0	0	0	0	0	0		0	5	2	3	6	1
1135	AC199343.3_FG013	0	0	0	0	0	0	0		2	0	0	0	2	0	6	0	1	0	0	0	0	0	0	1		3	1	0	0	3	0	1	1	1	1	1	0	1	2	1	0		13	4	17	10	5	6
1136	AC199355.3_FG004	0	0	0	0	0	0	0		1	0	0	0	0	0	0	0	0	0	0	0	0	0	0	0		0	0	0	0	0	0	0	0	0	0	0	0	0	0	0	0		1	0	0	1	0	0
1137	AC199363.4_FG003	0	0	0	0	0	0	0		9	0	13	0	4	0	3	0	1	12	0	8	0	1	1	2		4	4	5	8	1	2	0	0	11	13	4	4	2	1	1	0		71	87	70	122	72	84
1138	AC199370.4_FG006	0	0	0	0	0	0	0		0	0	0	0	0	0	0	0	0	0	0	0	0	0	0	0		0	0	0	0	0	0	0	0	0	0	0	0	0	0	0	0		0	0	0	0	0	0
1139	AC199379.4_FG001	0	0	0	0	0	0	0		0	0	0	0	0	0	0	0	0	0	0	0	0	0	0	0		0	0	0	0	0	0	0	0	0	0	0	0	0	0	0	0		0	0	0	0	0	0
1140	AC199379.4_FG008	0	0	0	0	0	0	0		0	0	0	0	0	0	0	0	0	0	0	0	0	0	0	0		0	0	0	0	0	0	0	0	0	0	0	0	0	0	0	0		2	1	2	1	2	1
1141	AC199382.3_FG005	0	0	0	0	0	0	0		0	0	1	0	0	0	0	0	0	0	0	1	1	0	0	0		0	0	0	0	0	0	1	0	0	0	0	0	1	0	0	0		0	0	2	1	1	3
1142	AC199384.3_FG002	0	0	0	0	0	0	0		0	0	0	0	0	0	0	0	0	0	0	0	0	0	0	0		1	1	0	0	0	0	0	0	0	0	0	0	0	0	0	0		0	6	6	3	6	4
1143	AC199421.3_FG001	0	0	0	0	0	0	0		0	0	0	0	0	0	0	0	0	0	0	0	0	0	0	0		0	0	0	0	0	0	0	0	0	0	0	0	0	0	0	0		0	0	0	0	0	0
1144	AC199439.4_FG005	0	0	0	0	0	0	0		0	0	0	0	0	0	0	0	0	0	0	0	0	0	0	0		0	0	0	0	0	0	0	0	0	0	0	0	0	0	0	0		3	11	10	6	8	5
1145	AC199479.4_FG004	0	0	0	0	0	0	0		0	0	0	0	0	0	0	0	0	0	0	0	0	0	0	0		0	0	0	0	0	0	0	0	0	0	0	0	0	0	0	0		0	0	0	0	0	1
1146	AC199481.3_FG001	0	0	0	0	0	0	0		0	0	0	0	0	0	0	0	0	0	0	0	0	0	1	0		0	0	0	0	0	0	0	0	0	0	0	0	0	0	0	0		2	1	0	1	0	0
1147	AC199487.4_FG002	0	0	0	0	0	0	0		0	0	0	0	0	0	0	0	0	0	0	0	0	0	0	0		0	0	0	0	0	0	0	0	0	0	0	0	0	0	0	0		0	0	0	0	0	0
1148	AC199487.4_FG003	0	0	0	0	0	0	0		0	0	0	0	0	0	0	0	0	0	0	0	0	0	0	0		0	0	0	0	0	0	0	0	0	0	0	0	0	0	0	0		2	5	3	5	3	6
1149	AC199488.4_FG003	0	0	0	0	0	0	0		0	0	0	0	0	0	0	0	0	0	0	0	0	0	0	0		0	0	0	0	0	0	0	0	0	0	0	0	0	0	0	0		0	0	0	0	0	1
1150	AC199488.4_FG004	0	0	0	0	0	0	0		0	0	0	0	0	0	0	0	0	0	0	0	0	0	0	0		0	0	0	0	0	0	0	0	0	0	0	0	0	0	0	0		0	0	0	0	0	0
1151	AC199492.3_FG001	0	0	0	0	0	0	0		0	0	0	0	0	0	0	0	0	0	0	0	0	0	0	0		0	0	0	0	0	0	0	0	0	0	0	0	0	0	0	0		2	3	3	5	1	2
1152	AC199517.4_FG001	0	0	0	0	0	0	0		0	0	0	0	0	0	0	0	0	0	0	0	0	0	0	0		0	0	0	0	0	0	0	0	0	0	0	0	0	0	0	0		0	0	0	0	0	0
1153	AC199517.4_FG006	0	0	0	0	0	0	0		0	0	0	0	0	0	0	0	0	0	0	0	0	0	0	0		0	0	0	0	0	0	0	0	0	0	0	0	0	0	0	0		0	0	0	0	0	0
1154	AC199524.3_FG002	0	0	0	0	0	0	0		0	0	0	0	0	0	0	0	0	0	0	0	0	0	0	0		0	0	0	0	0	0	0	0	0	0	0	0	0	0	0	0		0	0	0	0	0	0
1155	AC199526.5_FG001	0	1	0	0	0	0	0		0	0	0	0	0	0	0	0	0	0	0	0	0	0	0	0		0	0	0	0	0	0	0	0	0	0	0	0	0	0	0	0		26	0	6	6	22	0
1156	AC199526.5_FG002	0	0	0	0	0	0	0		38	0	31	0	41	0	52	0	0	13	0	17	0	48	0	26		18	19	12	11	29	28	27	24	22	20	19	24	21	25	22	23		3352	1789	3343	2931	2545	1687
1157	AC199526.5_FG003	0	0	0	0	1	1	1		17	0	7	0	11	0	12	0	0	18	1	13	0	11	0	19		3	7	8	2	8	3	10	4	14	4	4	6	12	6	11	3		92	80	73	94	78	90
1158	AC199541.4_FG001	0	0	0	0	0	0	0		0	0	0	0	0	0	0	0	0	0	0	0	0	0	0	0		0	0	0	0	0	0	0	0	0	0	0	0	0	0	0	0		84	223	109	110	70	133
1159	AC199541.4_FG002	0	0	0	0	0	0	0		0	0	0	0	0	0	0	0	0	0	0	0	0	0	0	0		0	0	0	0	0	0	0	0	0	0	0	0	0	0	0	0		1	0	0	0	1	0
1160	AC199541.4_FG004	0	1	0	0	0	0	0		0	0	0	0	0	0	0	0	0	0	0	0	0	0	0	0		0	0	0	0	0	0	0	0	0	0	0	0	0	0	0	0		13	0	8	4	7	1
1161	AC199541.4_FG007	0	0	0	0	0	0	0		0	0	0	0	0	0	0	0	0	0	0	0	0	0	0	0		0	0	0	0	0	0	0	0	0	0	0	0	0	0	0	0		51	27	53	50	35	38
1162	AC199543.4_FG004	0	0	0	0	0	0	0		0	0	0	0	0	0	0	0	0	0	0	0	0	0	0	0		0	0	0	0	0	0	0	0	0	0	0	0	0	0	0	0		0	1	1	3	2	6
1163	AC199554.2_FG003	0	0	0	0	0	0	0		0	0	0	0	0	0	0	0	0	0	0	0	0	0	0	0		0	0	0	0	0	0	0	0	0	0	0	0	0	0	0	0		0	0	0	0	0	0
1164	AC199571.3_FG001	0	0	0	0	0	0	0		0	0	0	0	0	0	0	0	0	0	0	0	0	0	0	0		0	0	0	0	0	0	0	0	0	0	0	0	0	0	0	0		1	1	3	2	1	3
1165	AC199571.3_FG003	0	0	1	0	0	0	0		0	0	0	0	0	0	0	0	0	0	0	0	0	0	0	0		0	0	0	0	0	1	0	0	0	0	0	0	0	0	1	0		0	15	4	8	0	23
1166	AC199571.3_FG004	0	0	0	0	0	0	0		0	0	0	0	0	0	0	0	0	0	0	0	0	0	0	0		0	0	1	0	0	0	0	0	0	0	0	0	0	0	1	0		10	26	30	28	12	17
1167	AC199572.3_FG005	0	0	0	0	0	0	0		0	0	0	0	0	0	0	0	0	0	0	0	0	0	0	0		0	0	0	0	0	0	0	0	0	0	0	0	0	0	0	0		0	1	0	0	0	0
1168	AC199577.4_FG004	0	0	0	0	0	0	0		0	0	0	0	0	0	0	0	0	0	0	0	0	0	0	0		0	0	0	0	0	0	0	0	0	0	0	0	0	0	0	0		2	0	0	1	2	2
1169	AC199624.4_FG007	0	0	0	0	0	0	0		0	0	0	0	0	0	0	0	0	0	0	0	0	0	0	1		0	0	0	0	0	2	0	0	0	0	0	1	0	0	0	0		2	5	5	3	0	3
1170	AC199632.4_FG007	0	0	0	0	0	0	0		0	0	0	0	0	0	0	0	0	0	0	0	0	0	0	0		0	0	0	0	0	0	0	0	0	0	0	0	0	0	0	0		0	4	2	0	1	2
1171	AC199638.4_FG001	0	0	0	0	0	0	0		0	0	0	0	0	0	0	0	0	0	0	0	0	0	0	0		0	0	0	0	0	0	0	0	0	0	0	0	0	0	0	0		2	1	3	0	0	2
1172	AC199701.4_FG001	0	0	0	0	0	0	0		0	0	0	0	0	0	0	0	0	0	0	0	0	0	0	0		0	0	0	0	0	0	0	0	0	0	0	0	0	0	0	0		0	0	0	0	0	0
1173	AC199703.3_FG003	0	0	1	0	0	0	0		0	0	0	0	0	0	0	0	0	0	0	0	0	0	0	0		0	0	0	0	0	0	1	0	0	0	0	0	0	0	0	0		0	3	5	3	1	5
1174	AC199705.3_FG006	0	0	0	0	0	0	0		0	0	0	0	0	0	0	0	0	0	1	0	0	0	0	0		0	0	0	0	0	0	1	0	0	0	0	0	0	0	0	0		1	1	0	0	0	1
1175	AC199705.3_FG008	0	0	0	0	0	0	0		0	0	0	0	0	0	0	0	0	0	0	0	0	0	0	0		0	0	0	0	0	0	0	0	0	0	0	0	0	0	0	0		12	21	11	22	11	34
1176	AC199728.4_FG006	0	0	0	0	0	0	0		0	0	0	0	0	0	0	0	0	0	0	0	0	0	0	0		0	0	0	0	0	0	0	0	0	0	0	0	0	0	0	0		3	0	1	0	0	1
1177	AC199765.4_FG008	0	0	0	0	0	0	0		0	0	0	0	0	0	0	0	0	0	0	0	0	0	0	0		0	0	0	0	0	0	0	0	0	0	0	0	0	0	0	0		1880	1187	1821	1498	1478	1116
1178	AC199768.4_FG008	0	0	0	0	0	0	0		0	0	0	0	0	0	0	0	0	0	0	0	0	0	0	0		0	0	0	0	0	0	0	0	0	0	0	0	0	0	0	0		0	0	0	1	0	0
1179	AC199771.4_FG001	0	0	0	0	0	0	0		0	0	0	0	0	0	0	0	0	0	0	0	0	0	0	0		0	0	0	0	0	0	0	0	0	0	0	0	0	0	0	0		1	0	0	0	1	0
1180	AC199777.3_FG001	0	0	0	0	0	0	0		0	0	0	0	0	0	0	0	0	0	0	0	0	0	0	0		0	0	0	0	0	0	0	0	0	0	0	0	0	0	0	0		0	0	0	1	0	0
1181	AC199779.3_FG006	0	0	0	0	1	1	1		8	0	5	0	11	0	6	0	0	12	0	14	0	12	0	15		5	6	1	8	3	11	5	7	6	5	1	7	6	7	2	9		16	23	17	20	10	23
1182	AC199782.5_FG001	0	0	0	0	1	1	1		11	1	11	0	1	0	2	0	0	5	1	7	0	0	0	1		11	2	14	6	2	0	1	0	8	4	13	4	0	0	3	0		925	994	993	998	934	973
1183	AC199782.5_FG002	0	0	0	0	0	0	0		1	0	2	0	1	0	1	0	2	0	0	2	0	1	0	2		0	1	1	0	0	0	0	3	2	1	0	0	0	1	0	0		1661	1645	1615	2034	1599	1581
1184	AC199782.5_FG003	0	0	0	0	0	0	0		13	0	6	0	17	0	18	0	0	2	0	4	0	7	0	6		2	5	0	1	5	2	7	3	2	5	3	6	4	7	7	4		69	46	58	53	71	31
1185	AC199790.4_FG013	0	0	0	0	0	0	0		0	0	0	0	0	0	0	0	0	0	0	0	0	0	0	0		0	0	0	0	0	0	0	0	0	0	0	0	0	0	0	0		0	0	0	0	0	0
1186	AC199801.4_FG005	0	0	0	0	0	0	0		0	0	0	0	0	0	0	0	0	0	0	0	0	0	0	0		0	0	0	0	0	0	0	0	0	0	0	0	0	0	0	0		0	4	0	1	1	0
1187	AC199810.3_FG003	0	0	0	0	0	0	0		0	0	0	0	0	0	0	0	0	0	0	0	0	0	0	0		0	0	0	0	0	0	0	0	0	0	0	0	0	0	0	0		0	0	0	0	0	0
1188	AC199820.4_FG006	0	0	0	0	0	0	0		4	0	5	0	3	0	6	0	0	9	0	3	0	5	0	5		3	0	1	2	4	0	3	2	0	1	1	0	2	3	2	1		18	22	9	8	18	15
1189	AC199826.4_FG003	0	0	0	0	0	0	0		1	0	1	0	0	0	0	0	0	3	0	1	0	4	0	3		0	2	1	2	0	2	3	3	0	1	0	2	3	3	4	4		8	32	16	29	4	24
1190	AC199843.4_FG007	0	0	0	0	0	0	0		0	0	0	0	0	0	0	0	0	0	0	0	0	0	0	0		0	0	0	0	0	0	0	0	0	0	0	0	0	0	0	0		4	4	4	2	1	2
1191	AC199857.4_FG004	0	0	0	0	0	0	0		0	0	0	0	0	0	0	0	0	0	0	0	0	0	0	0		0	0	0	0	0	0	0	0	0	0	0	0	0	0	0	0		0	0	0	0	0	0
1192	AC199873.4_FG002	0	0	0	0	0	0	0		0	0	0	0	0	0	0	0	0	0	0	0	0	0	0	0		0	0	0	0	0	0	0	0	0	0	0	0	0	0	0	0		6	7	4	5	6	1
1193	AC199875.3_FG002	0	0	0	0	0	0	0		0	0	0	0	0	0	0	0	0	0	0	0	0	0	0	0		0	0	0	0	0	0	0	0	0	0	0	0	0	0	0	0		0	0	0	0	0	0
1194	AC199893.4_FG002	0	0	0	0	0	0	0		23	1	16	0	14	0	10	0	0	13	1	14	0	7	2	12		7	7	6	6	5	5	10	4	5	7	15	14	9	8	3	2		50	23	29	19	34	27
1195	AC199908.4_FG002	0	0	0	0	0	0	0		0	0	0	0	0	0	0	0	0	0	0	0	0	0	0	0		0	0	0	0	0	0	0	0	0	0	0	0	0	0	0	0		2	1	4	2	1	0
1196	AC199911.5_FG001	0	0	0	0	0	0	0		1	0	1	0	0	0	0	0	0	0	0	0	1	0	1	0		1	0	1	0	1	0	2	0	1	0	1	1	1	0	0	0		1	3	3	1	2	2
1197	AC199918.4_FG003	0	0	0	0	0	0	0		0	0	0	0	0	0	0	0	0	0	0	0	0	0	0	0		0	0	0	0	0	0	0	0	0	0	0	0	0	0	0	0		0	0	0	0	0	0
1198	AC199932.4_FG002	0	0	0	0	0	0	0		0	0	0	0	0	0	0	0	0	0	0	0	0	0	0	0		0	0	0	0	0	0	0	0	0	0	0	0	0	0	0	0		0	0	0	0	0	0
1199	AC199956.4_FG003	0	0	0	0	0	0	0		0	0	0	0	0	0	0	0	0	0	0	0	0	0	0	0		0	0	0	0	0	0	0	0	0	0	0	0	0	0	0	0		0	0	0	0	0	0
1200	AC199961.4_FG001	0	0	0	0	0	0	0		0	0	0	0	0	0	0	0	0	1	0	0	0	0	0	0		0	0	0	0	0	0	0	0	0	0	0	0	0	0	0	0		2	3	1	4	1	2
1201	AC199961.4_FG004	0	0	0	0	0	0	0		0	0	0	0	0	0	0	0	0	0	0	0	0	0	0	0		0	1	0	0	0	0	0	0	0	0	0	0	0	0	0	0		1	2	4	9	4	6
1202	AC200038.4_FG011	0	0	0	0	0	0	0		0	0	0	0	0	0	0	0	0	0	0	0	0	0	0	0		0	0	0	0	0	0	0	0	0	0	0	0	0	0	0	0		0	1	0	1	0	0
1203	AC200045.3_FG006	0	0	0	0	0	0	0		0	0	0	0	0	0	0	0	0	0	0	0	0	0	0	0		0	0	0	0	0	0	0	0	0	0	0	0	0	0	0	0		0	0	0	1	0	0
1204	AC200047.3_FG004	0	0	0	0	0	0	0		0	0	0	0	0	0	0	0	0	0	0	0	0	0	0	0		0	0	0	0	0	0	0	0	0	0	0	0	0	0	0	0		0	0	0	0	0	0
1205	AC200057.4_FG006	0	0	0	0	0	0	0		0	0	0	0	0	0	0	0	0	0	0	0	0	0	0	0		0	0	0	0	0	0	0	0	0	0	0	0	0	0	0	0		0	0	1	0	0	0
1206	AC200057.4_FG007	0	0	0	0	0	0	0		0	0	0	0	0	0	0	0	0	0	0	0	0	0	0	0		0	0	0	0	0	0	0	0	0	0	0	0	0	0	0	0		195	154	165	167	167	134
1207	AC200065.5_FG009	0	0	0	0	0	0	0		0	0	0	0	0	0	0	0	0	0	0	0	0	1	0	0		0	0	1	0	0	0	0	0	1	0	0	1	1	1	0	0		3	2	1	4	0	0
1208	AC200069.4_FG002	0	0	0	0	0	0	0		0	0	0	0	0	0	0	0	0	0	0	0	1	0	0	0		0	0	0	0	0	0	0	0	0	0	0	0	0	0	0	0		1	0	2	0	0	0
1209	AC200099.4_FG003	0	0	0	0	0	0	0		0	0	0	0	0	0	0	0	0	0	0	0	0	0	0	0		0	0	0	0	0	0	0	0	0	0	0	0	0	0	0	0		0	0	0	0	0	0
1210	AC200099.4_FG006	0	0	0	0	0	0	0		2	0	1	0	1	0	1	0	1	0	1	3	0	5	0	1		0	3	1	0	2	1	1	1	0	1	1	2	0	0	0	2		3	6	9	3	3	7
1211	AC200106.4_FG003	0	0	0	0	0	0	0		0	0	0	0	0	0	0	0	0	0	0	0	0	0	0	0		0	0	0	0	0	0	0	0	0	0	0	0	0	0	0	0		0	0	0	0	0	1
1212	AC200112.4_FG007	0	0	0	0	0	0	0		0	0	0	0	0	0	0	0	0	0	0	0	0	0	0	0		0	0	0	0	0	0	0	0	0	0	0	0	0	0	0	0		0	0	0	0	0	0
1213	AC200112.4_FG008	0	0	0	0	0	0	0		0	0	0	0	0	0	0	0	0	0	0	0	0	0	0	0		0	0	0	0	0	0	0	0	0	0	0	0	0	0	0	0		2	0	3	5	1	1
1214	AC200117.3_FG004	0	0	0	0	0	0	0		0	0	0	0	0	0	0	0	0	0	0	0	0	0	0	0		0	0	0	0	0	0	0	0	0	0	0	0	0	0	0	0		0	1	0	0	0	1
1215	AC200122.4_FG004	0	0	0	0	0	0	0		0	0	0	0	0	0	0	0	0	0	0	0	0	0	0	0		0	0	0	0	0	0	0	0	0	0	0	0	0	0	0	0		1	3	1	0	0	0
1216	AC200124.3_FG005	0	0	0	0	0	0	0		0	0	0	0	0	0	0	0	0	0	0	0	0	0	0	0		0	0	0	0	0	0	0	0	0	0	0	0	0	0	0	0		1	3	3	0	0	1
1217	AC200138.3_FG003	0	0	1	0	0	0	0		0	0	0	0	0	0	0	0	0	0	0	0	0	0	0	0		2	1	0	0	0	0	0	0	1	0	0	0	0	0	0	0		0	4	5	4	0	3
1218	AC200143.3_FG003	0	0	0	0	0	0	0		0	0	0	0	0	0	0	0	0	0	0	0	0	0	0	0		0	0	0	0	0	0	0	0	0	0	0	0	0	0	0	0		0	0	0	1	0	0
1219	AC200171.2_FG001	0	0	0	0	0	0	0		0	0	0	0	0	0	0	0	0	0	0	0	0	0	0	0		0	0	0	0	0	0	0	0	0	0	0	0	0	0	0	0		0	0	0	0	0	0
1220	AC200178.2_FG002	0	0	0	0	0	0	0		2	0	1	0	0	0	1	0	1	0	0	1	0	2	0	0		1	1	0	1	0	0	1	0	1	1	1	1	1	1	0	1		3	4	4	5	1	1
1221	AC200178.2_FG003	0	1	0	0	0	0	0		1	0	0	0	1	0	2	0	0	0	0	0	0	0	0	0		0	0	2	0	2	0	1	0	0	0	0	0	1	0	0	0		2	0	0	1	4	0
1222	AC200207.2_FG001	0	0	0	0	0	0	0		0	0	0	0	0	0	0	0	0	0	0	0	0	0	0	0		0	0	0	0	0	0	0	0	0	0	0	0	0	0	0	0		0	1	1	0	0	0
1223	AC200209.1_FG001	0	0	0	0	0	0	0		0	0	0	0	0	0	0	0	0	0	0	0	0	0	0	0		0	0	0	0	0	0	0	0	0	0	0	0	0	0	0	0		0	0	0	0	0	0
1224	AC200210.1_FG006	0	0	0	0	0	0	0		10	0	6	0	7	1	10	0	0	5	0	9	0	11	0	11		7	8	1	5	7	5	5	3	4	4	5	7	6	3	6	3		152	131	159	139	130	113
1225	AC200215.3_FG002	0	0	0	0	0	0	0		0	0	0	0	0	0	0	0	0	0	0	0	0	0	0	0		0	0	0	0	0	0	0	0	0	0	0	0	0	0	0	0		2	3	1	4	2	2
1226	AC200225.5_FG001	0	0	0	0	0	0	0		0	0	0	0	0	0	0	0	0	0	0	0	0	0	0	0		0	0	0	0	0	0	0	0	0	0	0	0	0	0	0	0		0	0	2	2	0	0
1227	AC200228.4_FG001	0	0	0	0	0	0	0		0	0	0	0	0	0	0	0	0	0	0	0	0	0	0	0		0	0	0	0	0	0	0	0	0	0	0	0	0	0	0	0		1	2	2	2	0	1
1228	AC200234.3_FG001	0	0	0	0	0	0	0		0	0	0	0	0	0	0	0	0	0	0	0	0	0	0	0		0	0	0	0	0	0	0	0	0	0	0	0	0	0	0	0		0	0	0	0	0	0
1229	AC200234.3_FG006	0	0	0	0	0	0	0		0	0	0	0	0	0	0	0	0	0	0	0	0	0	0	0		0	0	0	0	0	0	0	0	0	0	0	0	0	0	0	0		0	2	2	3	0	2
1230	AC200240.3_FG002	0	0	0	0	0	0	0		0	0	0	0	0	0	0	0	0	0	0	0	0	0	0	0		0	1	0	1	0	0	0	0	0	0	0	0	0	0	0	0		4	4	9	6	4	2
1231	AC200256.3_FG003	0	0	0	0	0	0	0		0	0	2	0	0	0	0	0	1	1	0	0	1	0	0	0		0	0	1	0	0	0	0	0	1	0	0	0	0	0	0	0		4	4	1	2	2	1
1232	AC200287.4_FG006	0	0	0	0	0	0	0		0	0	0	0	0	0	0	0	0	0	0	0	0	0	0	0		0	0	0	0	0	0	0	0	0	0	0	0	0	0	0	0		20	27	28	55	27	55
1233	AC200298.4_FG001	0	0	0	0	0	0	0		0	0	0	0	0	0	0	0	0	0	1	0	0	0	0	0		0	0	0	0	0	0	0	0	0	0	0	1	0	0	0	0		1	4	4	4	2	3
1234	AC200490.3_FG005	0	0	0	0	0	0	0		0	0	1	0	0	0	0	0	0	0	0	0	0	0	0	0		0	0	0	0	0	0	0	0	0	0	0	0	0	1	0	0		0	0	0	0	1	0
1235	AC200495.3_FG001	0	0	0	0	0	0	0		0	0	0	0	0	0	0	0	0	0	0	0	0	0	0	0		0	0	0	0	0	0	0	0	0	0	0	0	0	0	0	0		11	2	6	3	8	2
1236	AC200497.4_FG015	0	0	0	0	0	0	0		0	0	0	0	0	0	0	0	0	0	0	0	0	0	0	0		0	0	0	0	0	0	0	0	0	0	0	0	0	0	0	0		0	0	0	0	0	0
1237	AC200535.4_FG002	0	0	0	0	0	0	0		0	0	0	0	0	0	0	0	0	0	0	0	0	0	0	0		0	0	0	0	0	0	0	0	0	0	0	0	0	0	0	0		0	0	0	0	0	0
1238	AC200540.3_FG002	0	0	0	0	0	0	0		0	0	0	0	0	0	0	0	0	0	0	0	0	0	0	0		0	0	0	0	0	0	0	0	0	0	0	0	0	0	0	0		0	0	1	0	0	1
1239	AC200565.4_FG001	0	0	0	0	0	0	0		0	0	0	0	0	0	0	0	0	0	0	0	0	0	0	0		0	0	0	0	0	0	0	0	0	0	0	0	0	0	0	0		0	4	2	1	3	0
1240	AC200622.3_FG005	0	0	0	0	0	0	0		0	0	0	0	0	1	0	0	0	0	0	0	0	0	0	0		0	0	0	0	0	0	0	0	0	0	0	0	0	0	0	0		0	0	0	0	0	1
1241	AC200627.3_FG005	0	0	0	0	0	0	0		0	0	0	0	0	0	0	0	0	0	0	0	0	0	0	0		0	0	0	0	0	0	0	0	0	0	0	0	0	0	0	0		1	0	1	0	0	0
1242	AC200670.3_FG002	0	0	0	0	0	0	0		0	0	0	0	0	0	0	0	0	0	0	0	0	0	0	0		0	0	0	0	0	0	0	0	0	0	0	0	0	0	0	0		0	1	0	1	0	0
1243	AC200725.4_FG003	0	0	0	0	0	0	0		0	0	0	0	0	0	0	0	0	0	0	0	0	0	0	0		0	0	0	0	0	0	0	0	0	0	0	0	0	0	0	0		1	1	0	3	1	3
1244	AC200725.4_FG008	0	0	0	0	0	0	0		0	0	0	0	0	0	0	0	0	0	0	0	0	0	0	0		0	0	0	0	0	0	0	0	0	0	0	0	0	0	0	0		0	0	0	0	0	0
1245	AC200739.5_FG001	0	0	0	0	0	0	0		0	0	0	0	0	0	0	0	0	0	0	0	0	0	0	0		0	0	0	0	0	0	0	0	0	0	0	0	0	0	0	0		1	2	1	0	1	1
1246	AC200753.3_FG003	0	0	0	0	1	1	1		20	0	13	0	27	1	25	0	0	14	0	16	2	40	1	38		4	12	7	8	9	19	11	30	4	24	3	16	8	23	8	28		121	132	147	199	106	154
1247	AC200754.4_FG004	0	0	0	0	0	0	0		0	0	0	0	0	0	0	0	0	0	0	0	0	0	0	0		0	0	0	0	0	0	0	0	0	0	1	0	0	0	0	0		0	0	2	0	0	0
1248	AC200876.4_FG002	0	0	0	0	0	0	0		0	0	0	0	0	0	0	0	0	0	0	0	0	0	0	0		0	0	0	0	0	0	0	0	0	0	0	0	0	0	0	0		0	0	0	0	0	0
1249	AC200876.4_FG003	0	0	0	0	0	0	0		0	0	0	0	0	0	0	0	0	0	0	0	0	0	0	0		0	0	0	0	0	0	0	0	0	0	0	0	0	0	0	0		0	0	0	0	0	0
1250	AC200881.4_FG002	0	0	0	0	0	0	0		0	0	0	0	0	0	0	0	0	0	0	0	0	0	0	0		0	0	0	0	0	0	0	0	0	0	0	0	0	0	0	0		0	3	1	0	0	0
1251	AC200881.4_FG007	0	0	0	0	0	0	0		0	0	0	0	0	0	0	0	0	0	0	0	0	0	0	0		0	0	0	0	0	0	0	0	0	0	0	0	0	0	0	0		1	0	0	2	0	2
1252	AC200884.4_FG002	0	0	0	0	0	0	0		0	0	0	0	0	0	0	0	0	0	0	0	0	0	0	0		0	0	0	0	0	0	0	0	0	0	0	0	1	0	0	0		2	3	6	0	3	1
1253	AC200887.4_FG002	0	0	0	0	0	0	0		0	0	0	0	0	0	0	0	0	0	0	0	0	0	0	0		0	0	0	0	0	0	0	0	0	0	0	0	0	0	0	0		0	1	0	0	0	0
1254	AC200904.3_FG003	0	0	0	0	0	0	0		0	0	0	0	0	0	0	0	0	0	0	0	0	0	0	0		0	0	0	0	0	0	0	0	1	0	0	0	0	0	0	0		0	2	0	1	1	1
1255	AC201740.3_FG003	0	0	0	0	0	0	0		0	0	0	0	0	0	0	0	0	0	1	0	0	0	0	0		0	0	0	0	0	0	0	0	0	0	0	0	0	0	0	0		0	0	0	1	2	2
1256	AC201767.3_FG003	0	0	0	0	0	0	0		0	0	0	0	0	0	0	0	0	0	0	0	0	0	0	0		0	0	0	0	0	0	0	0	0	0	0	0	0	0	0	0		1	0	1	1	1	0
1257	AC201769.3_FG002	0	0	0	0	0	0	0		13	0	15	0	5	0	5	0	0	2	0	5	0	3	1	6		7	4	8	2	0	4	3	0	2	2	12	6	3	4	1	2		53	21	40	14	32	21
1258	AC201791.3_FG005	0	0	0	0	0	0	0		0	0	0	0	0	0	0	0	0	0	0	0	0	0	0	0		0	0	0	0	0	0	0	0	0	0	0	0	0	0	0	0		2	3	2	0	0	1
1259	AC201797.4_FG006	0	0	0	0	0	0	0		0	0	0	0	0	0	0	0	0	0	0	0	0	0	0	0		0	0	0	0	0	0	0	0	0	0	0	0	0	0	0	0		1	0	2	0	0	0
1260	AC201798.4_FG005	0	0	0	0	0	0	0		0	0	0	0	0	0	0	0	0	0	0	0	0	0	0	0		0	0	0	0	0	0	0	0	0	0	0	0	0	0	0	0		1	0	0	1	0	0
1261	AC201815.4_FG001	0	0	0	0	0	0	0		0	0	0	0	2	0	3	0	0	0	0	0	1	0	0	0		1	0	0	0	0	0	0	0	0	0	1	0	0	0	0	0		40	51	34	55	43	36
1262	AC201828.3_FG002	0	0	0	0	0	0	0		0	0	0	0	0	0	0	0	0	0	0	0	0	0	0	0		0	0	0	0	0	0	0	0	0	0	0	0	0	0	0	0		1	1	0	0	0	0
1263	AC201832.3_FG006	0	0	0	0	0	0	0		0	0	0	0	1	0	0	0	1	0	0	0	0	0	0	0		0	0	0	0	0	0	0	0	0	0	0	0	0	0	0	0		0	3	0	1	0	0
1264	AC201888.3_FG013	0	0	0	0	0	0	0		0	0	0	0	0	0	0	0	0	0	0	0	0	0	0	0		0	0	0	0	0	0	0	0	0	0	0	0	0	0	0	0		0	0	0	0	0	0
1265	AC201891.3_FG001	0	0	0	0	0	0	0		0	0	0	0	0	0	0	0	0	0	0	0	0	0	0	0		0	0	0	0	0	0	0	0	0	0	0	0	0	0	0	0		8	2	4	5	10	1
1266	AC201898.4_FG004	0	0	0	0	0	0	0		0	0	0	0	0	0	0	0	0	2	0	2	0	2	0	1		5	3	1	0	0	0	1	0	0	0	1	1	0	0	4	2		0	4	13	4	0	6
1267	AC201966.3_FG001	0	0	0	0	0	0	0		0	0	0	0	0	0	0	0	0	0	0	0	0	0	0	0		0	0	0	0	0	0	0	0	0	0	0	0	0	0	0	0		0	0	0	0	0	0
1268	AC201969.4_FG005	0	0	0	0	0	0	0		0	0	0	0	0	0	0	0	0	0	0	0	0	0	0	0		0	0	0	0	0	0	0	0	0	0	0	0	0	0	0	0		1	1	1	0	1	0
1269	AC201977.3_FG005	0	0	0	0	0	0	0		0	0	0	0	0	0	0	0	0	0	0	0	0	0	0	0		0	0	0	0	0	0	0	0	0	0	0	0	0	0	0	0		0	0	0	0	0	0
1270	AC201985.4_FG003	0	0	0	0	0	0	0		0	0	0	0	0	0	0	0	0	0	0	0	0	0	0	0		0	0	0	0	0	0	0	0	0	0	0	0	0	0	0	0		1	2	2	1	1	1
1271	AC201986.3_FG002	0	0	0	0	0	0	0		0	0	0	0	0	0	0	0	0	0	0	0	0	0	0	0		0	0	0	0	0	0	0	0	0	0	0	0	0	0	0	0		0	3	0	1	0	0
1272	AC201995.4_FG001	0	0	0	0	0	0	0		0	0	0	0	0	0	0	0	0	0	0	0	0	0	0	0		0	0	0	0	0	0	0	0	0	0	0	0	0	0	0	0		0	0	0	0	2	0
1273	AC202000.4_FG006	0	0	0	0	0	0	0		0	0	0	0	0	0	0	0	0	0	0	0	0	0	0	0		0	0	0	0	0	0	0	0	0	0	0	0	0	0	0	0		0	0	0	0	2	2
1274	AC202011.3_FG010	0	0	0	0	0	0	0		14	0	10	0	30	0	36	0	0	10	0	14	0	23	0	27		5	11	8	6	22	26	30	37	17	23	8	9	23	29	25	31		115	89	111	226	128	93
1275	AC202015.3_FG004	0	0	0	0	0	0	0		0	0	0	0	0	0	0	0	0	0	0	0	0	0	0	0		0	0	0	0	0	0	0	0	0	0	0	0	0	0	0	0		0	0	0	0	0	0
1276	AC202040.4_FG002	0	0	0	0	0	0	0		0	0	0	0	0	0	0	0	0	0	0	0	0	0	0	0		0	0	0	0	0	0	0	0	0	0	0	0	0	0	0	0		0	0	0	0	0	1
1277	AC202041.4_FG003	0	0	0	0	0	0	0		1	0	0	0	0	0	0	0	0	0	0	3	0	0	0	0		0	0	0	2	1	0	1	0	0	0	1	0	0	1	0	1		1	1	2	3	3	4
1278	AC202069.3_FG002	0	0	0	0	0	0	0		0	0	0	0	0	0	0	0	0	0	0	0	0	0	0	0		0	0	0	0	0	0	0	0	0	0	1	0	0	0	0	0		0	1	0	0	0	0
1279	AC202073.4_FG001	0	0	0	0	0	1	0		18	0	27	0	11	0	3	0	0	27	0	25	0	17	0	17		14	11	25	17	8	16	9	5	18	14	25	17	9	8	13	4		194	281	228	259	222	257
1280	AC202076.3_FG009	0	0	0	0	1	1	1		8	0	4	0	8	0	9	0	0	1	0	0	0	1	0	1		2	0	5	0	13	1	6	1	4	0	5	1	15	0	10	1		11	3	6	7	9	2
1281	AC202091.4_FG003	0	0	0	0	0	0	0		0	0	0	0	0	0	0	0	0	0	0	0	0	0	0	0		0	0	0	0	0	0	0	0	0	0	0	0	0	0	0	0		0	1	0	0	0	0
1282	AC202092.2_FG003	0	0	0	0	0	0	0		0	0	0	0	0	0	0	0	0	0	0	0	0	0	0	0		0	0	0	0	0	0	0	0	0	0	0	0	0	0	0	0		0	0	0	0	0	0
1283	AC202101.3_FG002	0	0	0	0	0	0	0		1	0	0	0	0	0	0	1	0	0	0	0	0	1	0	0		0	0	0	0	1	0	0	0	0	0	1	0	0	0	0	0		1	2	1	0	1	1
1284	AC202107.3_FG001	0	0	0	0	0	0	0		0	0	0	0	0	0	0	0	0	0	0	0	0	0	0	0		0	0	0	0	0	0	0	0	0	0	0	0	0	0	0	0		42	35	41	41	36	38
1285	AC202110.3_FG004	1	1	0	0	0	0	0		0	0	0	0	0	0	0	0	0	0	0	0	0	0	0	0		0	0	0	0	0	0	0	0	0	0	0	0	0	0	0	0		19	1	16	20	31	1
1286	AC202122.2_FG001	0	0	0	0	0	0	0		0	0	0	0	0	0	0	0	0	0	0	0	0	0	0	0		0	0	0	0	0	0	0	0	0	0	0	0	0	0	0	0		0	0	0	0	0	0
1287	AC202129.3_FG001	0	0	0	0	0	0	0		0	0	0	0	0	0	0	0	0	0	0	0	0	0	0	0		0	0	0	0	0	0	0	0	0	0	0	0	0	0	0	0		0	0	0	0	0	0
1288	AC202139.3_FG008	0	0	0	0	0	0	0		0	0	0	0	0	0	0	0	0	0	0	0	0	0	0	0		0	0	0	0	0	0	0	0	0	0	0	0	0	0	0	0		0	0	0	0	0	0
1289	AC202144.5_FG001	0	0	0	0	1	1	1		17	0	11	0	7	0	5	0	0	2	0	1	0	0	0	0		7	0	8	0	6	0	3	0	4	0	7	0	6	0	3	0		28	5	14	15	23	4
1290	AC202172.3_FG004	0	0	0	0	0	0	0		0	0	0	0	0	0	0	0	0	0	0	0	0	0	0	0		0	0	0	0	0	0	0	0	0	0	0	0	0	0	0	0		0	0	0	0	1	0
1291	AC202178.3_FG002	0	0	0	0	0	0	0		0	0	0	0	0	0	0	0	0	0	0	0	0	0	0	0		0	0	0	0	0	0	0	0	0	0	0	0	0	0	0	0		4	5	4	3	2	4
1292	AC202179.3_FG004	0	0	0	0	0	0	0		0	0	0	0	0	0	0	0	0	0	0	0	0	0	0	0		0	0	0	0	0	0	0	0	0	0	0	0	0	0	0	0		1	0	0	0	0	0
1293	AC202179.3_FG005	0	0	0	0	0	0	0		0	0	0	0	0	0	0	0	0	0	0	0	0	0	0	0		0	0	0	0	0	0	0	0	0	0	0	0	0	0	0	0		2	1	1	0	1	0
1294	AC202181.3_FG010	0	0	0	0	0	0	0		0	0	0	0	0	0	0	0	0	0	0	0	0	0	0	0		0	0	0	0	0	0	0	0	0	0	0	0	0	0	0	0		25	28	32	37	28	26
1295	AC202185.4_FG004	0	0	0	0	0	0	0		65	0	53	0	98	1	109	0	1	51	0	44	0	86	0	79		43	37	30	26	71	72	76	69	48	58	30	31	68	53	66	59		863	583	756	902	684	501
1296	AC202187.4_FG003	0	0	0	0	0	0	0		0	0	0	0	0	0	0	0	0	0	0	0	0	0	0	0		0	0	0	0	0	0	0	0	0	0	0	0	0	0	0	0		0	0	2	0	0	0
1297	AC202384.4_FG009	0	0	0	0	0	0	0		0	0	0	0	0	0	0	0	0	0	0	0	0	0	0	0		0	0	0	0	0	0	0	0	0	0	0	0	0	0	0	0		0	0	1	0	0	0
1298	AC202391.4_FG002	0	0	0	0	0	0	0		0	0	0	0	0	0	0	0	0	0	0	0	0	0	0	0		0	0	0	0	0	0	0	0	0	0	0	0	0	0	0	0		1	0	0	0	0	0
1299	AC202396.4_FG010	0	0	0	0	0	0	0		0	0	0	0	0	0	0	0	0	0	0	0	0	3	0	2		0	1	0	0	0	0	0	0	0	1	0	0	0	0	0	0		0	0	1	2	0	0
1300	AC202417.5_FG002	0	0	0	0	0	0	0		0	0	0	0	0	0	0	0	0	0	0	0	0	0	0	0		0	0	0	2	0	0	0	1	0	0	0	0	0	0	0	0		1	1	0	0	0	0
1301	AC202432.3_FG006	0	0	0	0	1	1	1		21	0	12	0	1	0	1	0	0	5	0	10	0	5	0	10		8	4	23	5	0	1	1	0	15	2	8	5	2	0	0	2		46	15	31	38	32	23
1302	AC202435.3_FG001	0	0	0	0	0	0	0		3	0	1	0	0	0	0	0	1	0	0	1	0	4	1	1		1	0	0	0	0	1	0	0	1	0	1	1	0	0	1	2		29	24	21	20	12	12
1303	AC202435.3_FG003	0	0	0	0	0	0	0		0	0	0	0	0	0	0	0	0	0	0	0	0	0	0	0		0	0	0	0	0	0	0	0	0	0	0	0	0	0	0	0		0	2	0	1	0	0
1304	AC202439.3_FG001	0	0	0	0	0	0	0		3	0	7	0	5	0	7	0	1	2	0	1	0	9	0	3		1	4	1	1	3	3	1	2	0	4	3	2	0	4	2	2		23	8	14	15	22	7
1305	AC202439.3_FG006	0	0	0	0	0	0	0		1	0	0	0	0	0	4	0	0	0	0	0	0	2	0	0		0	0	0	0	1	1	2	0	1	1	0	0	0	0	0	0		23	14	19	25	20	14
1306	AC202526.4_FG006	0	0	0	0	0	0	0		0	0	0	0	0	0	0	0	0	0	0	0	0	0	0	0		0	0	0	0	0	0	0	0	0	0	0	0	0	0	0	0		0	0	0	1	0	0
1307	AC202532.4_FG006	0	0	0	0	0	0	0		0	0	0	0	0	0	0	0	0	0	0	0	0	0	0	0		0	0	0	0	0	0	0	0	0	0	0	0	0	0	0	0		0	1	1	3	0	0
1308	AC202534.2_FG007	0	0	0	0	0	0	0		0	0	0	0	0	0	0	0	0	0	0	0	0	0	0	0		0	0	0	0	0	0	0	0	0	0	0	0	0	0	0	0		6	1	3	3	4	2
1309	AC202549.3_FG008	0	0	0	0	0	0	0		0	0	0	0	0	0	0	0	0	0	0	0	0	0	0	0		0	0	0	0	0	0	0	0	0	0	0	0	0	0	0	0		2	1	4	0	2	0
1310	AC202561.3_FG007	0	0	0	0	0	0	0		0	0	0	0	0	0	0	0	0	0	0	0	0	0	0	0		0	0	0	0	0	0	0	0	0	0	0	0	0	0	0	0		1	0	0	0	0	0
1311	AC202567.4_FG004	0	0	0	0	0	0	0		0	0	0	0	0	0	0	0	0	0	0	0	0	0	0	0		0	0	0	0	0	0	0	0	0	0	0	0	0	0	0	0		2	6	2	3	3	8
1312	AC202705.2_FG001	0	0	0	0	0	0	0		0	0	0	0	0	0	0	0	0	0	0	0	0	0	0	0		0	0	0	1	0	1	0	0	0	0	0	0	1	0	0	0		2	2	2	0	2	1
1313	AC202707.3_FG002	0	0	0	0	1	1	1		1	0	0	0	2	0	1	0	0	14	1	12	0	13	0	8		1	8	1	12	6	7	0	6	0	8	0	9	0	9	0	8		9	58	30	34	3	53
1314	AC202855.3_FG004	0	0	0	0	0	0	0		22	0	21	0	27	0	45	0	0	8	1	6	0	23	0	16		9	8	6	1	12	16	24	15	16	12	4	5	13	14	13	11		41	21	37	59	49	21
1315	AC202864.3_FG002	0	0	0	0	0	0	0		98	0	96	0	79	0	74	0	0	50	0	46	0	69	0	60		43	55	20	27	28	31	30	26	31	34	44	58	38	30	30	27		300	141	273	159	256	148
1316	AC202867.3_FG008	0	0	0	0	0	0	0		0	0	0	0	0	0	0	0	0	0	0	0	0	0	0	0		0	0	0	0	0	0	0	0	0	0	0	0	0	0	0	0		0	0	0	0	0	0
1317	AC202867.3_FG010	0	0	0	0	0	0	0		0	0	0	0	0	0	0	0	0	0	0	0	0	0	0	0		0	0	0	0	0	0	0	0	0	0	0	0	0	0	0	0		1	2	3	2	3	0
1318	AC202877.3_FG002	0	0	0	0	0	0	0		0	0	0	0	0	0	0	0	0	0	0	0	0	0	0	0		0	0	0	0	0	0	0	0	0	1	0	0	0	0	0	0		0	3	0	1	0	0
1319	AC202900.3_FG001	0	0	0	0	0	0	0		0	0	0	0	0	0	0	0	0	0	0	0	0	0	0	0		1	0	1	0	0	0	0	0	0	0	0	0	0	0	0	0		2	6	6	2	3	2
1320	AC202911.3_FG002	0	0	0	0	0	0	0		0	0	0	0	0	0	0	0	0	1	0	0	0	0	0	0		0	0	0	0	1	0	0	0	0	0	0	0	1	0	0	0		0	1	1	0	1	1
1321	AC202915.3_FG002	0	0	0	0	0	0	0		0	0	0	0	0	0	0	0	0	0	0	0	0	0	0	0		0	0	0	0	0	0	0	0	0	0	0	0	0	0	0	0		456	231	358	363	377	257
1322	AC202921.3_FG004	0	0	0	0	0	0	0		0	0	0	0	0	0	0	0	0	0	0	0	0	0	0	0		0	0	0	0	0	0	0	0	0	0	0	0	0	0	0	0		0	2	0	0	0	1
1323	AC202930.4_FG007	0	0	0	0	0	0	0		0	0	0	0	0	0	0	0	0	0	0	0	0	0	0	0		0	0	0	0	0	0	0	0	0	0	0	0	0	0	0	0		0	0	0	0	0	0
1324	AC202930.4_FG008	0	0	0	0	0	0	0		0	0	0	0	0	0	0	0	0	0	0	0	0	0	0	0		0	0	0	0	0	0	0	0	0	0	0	0	0	0	0	0		0	0	1	2	0	0
1325	AC202940.3_FG004	0	0	0	0	0	0	0		0	0	0	0	1	0	0	0	0	0	0	0	0	0	0	0		0	0	0	0	0	0	0	0	0	1	0	2	0	0	1	0		3	1	1	3	0	0
1326	AC202950.3_FG008	0	0	0	0	0	0	0		3	0	0	0	4	0	0	0	0	1	0	1	0	0	0	2		1	1	1	0	1	2	0	1	0	1	3	1	0	0	2	1		6	2	10	4	3	3
1327	AC202953.3_FG003	0	0	0	0	0	0	0		0	0	0	0	0	0	0	0	0	0	0	0	0	0	0	0		0	0	0	0	0	0	0	0	0	0	0	0	0	0	0	0		1	2	1	2	1	2
1328	AC202959.3_FG001	0	0	0	0	0	0	0		0	0	0	0	0	0	0	0	0	0	0	0	0	0	0	0		0	0	0	0	0	0	0	0	0	0	0	0	0	0	0	0		0	0	0	1	1	0
1329	AC202965.3_FG002	0	0	0	0	0	0	0		0	0	0	0	0	0	0	0	0	0	0	0	0	0	0	0		0	0	0	0	0	0	0	0	0	0	0	0	0	0	0	0		0	0	1	1	1	0
1330	AC202974.3_FG004	0	0	0	0	0	0	0		4	0	3	0	6	0	7	0	0	2	0	0	0	6	0	1		0	2	1	4	2	5	6	6	3	0	0	0	1	1	3	6		15	12	16	21	9	6
1331	AC202989.3_FG007	0	0	0	0	0	0	0		2	0	0	0	0	0	0	0	0	0	0	0	0	0	0	0		0	0	0	0	0	0	0	0	0	0	0	0	0	0	0	0		2	0	0	0	0	0
1332	AC202991.3_FG003	0	0	0	0	0	0	0		0	0	0	0	0	0	0	0	0	0	0	0	0	0	0	0		0	0	0	0	0	0	0	0	0	0	0	0	0	0	0	0		0	0	0	0	0	1
1333	AC203001.3_FG001	0	0	0	0	0	0	0		0	0	0	0	0	0	0	0	0	0	0	0	0	0	0	0		0	0	0	0	0	0	0	0	0	0	0	0	0	0	0	0		0	0	0	1	0	1
1334	AC203006.3_FG005	0	0	0	0	0	0	0		0	0	0	0	0	0	0	0	0	0	0	0	0	0	0	0		0	0	0	0	0	0	0	0	0	0	0	0	0	0	0	0		0	0	0	0	1	0
1335	AC203019.3_FG001	0	0	0	0	0	0	0		0	0	1	0	3	0	0	0	0	0	0	1	0	1	0	2		2	1	1	0	0	0	2	0	1	0	0	0	0	0	0	0		7	9	6	7	4	7
1336	AC203027.3_FG003	0	0	0	0	0	0	0		0	0	0	0	0	0	0	0	0	0	0	0	0	0	0	0		0	0	0	0	0	0	0	0	0	0	0	0	0	0	0	0		4	3	3	1	3	3
1337	AC203031.3_FG002	0	0	0	0	0	0	0		0	0	0	0	0	0	0	0	0	0	0	0	0	0	0	0		0	0	0	0	0	0	0	0	0	0	0	0	0	0	0	0		80	36	68	68	61	46
1338	AC203048.3_FG001	0	0	0	0	0	0	0		0	0	0	0	0	0	0	0	0	0	0	0	0	0	0	0		0	0	0	0	0	0	0	0	0	0	0	0	0	0	0	0		9	12	17	21	15	12
1339	AC203090.3_FG005	0	0	0	0	0	0	0		0	0	0	0	0	0	0	0	0	0	0	0	0	0	0	0		0	0	0	0	0	0	0	0	0	0	0	0	0	0	0	0		1	2	2	2	0	1
1340	AC203093.3_FG001	0	0	0	0	0	0	0		0	0	0	0	0	0	0	0	0	0	0	0	0	0	0	0		0	0	0	0	0	0	0	0	0	0	0	0	0	0	0	0		5	3	1	3	2	1
1341	AC203101.3_FG002	0	0	0	0	0	0	0		0	0	0	0	0	0	0	0	1	0	0	0	0	0	0	0		0	0	0	0	0	0	0	0	0	1	0	0	0	0	0	0		2	2	0	1	0	0
1342	AC203148.3_FG005	0	0	0	0	0	0	0		0	0	0	0	0	0	0	0	0	0	0	1	0	0	0	0		0	0	0	0	0	0	0	0	0	0	0	0	0	0	0	0		0	3	0	1	1	3
1343	AC203159.3_FG009	0	0	0	0	0	0	0		0	0	0	0	0	0	0	0	0	0	0	0	0	0	0	0		0	0	0	0	0	0	0	0	0	0	0	0	0	0	0	0		0	1	0	0	1	1
1344	AC203159.3_FG010	0	0	0	0	0	0	0		0	0	0	0	0	0	0	0	0	0	0	0	0	0	0	0		0	0	0	0	0	0	0	0	0	0	1	0	0	0	0	0		1	0	1	1	1	1
1345	AC203173.3_FG001	0	0	1	0	0	0	0		0	0	0	0	0	0	0	0	0	0	0	0	0	1	0	1		0	0	0	0	0	0	0	0	0	0	0	0	0	0	0	2		0	4	3	10	0	8
1346	AC203173.3_FG002	0	0	0	0	0	0	0		0	0	1	0	0	0	1	0	0	0	0	0	0	0	0	0		0	0	0	0	0	0	0	0	0	0	0	0	0	0	1	0		28	8	10	13	20	4
1347	AC203173.3_FG004	0	0	0	0	0	0	0		35	0	36	0	45	1	49	0	0	37	0	26	0	43	0	29		29	14	18	16	29	30	29	35	30	24	20	24	40	31	38	34		6534	4903	6145	5145	4711	3854
1348	AC203176.4_FG003	0	0	0	0	0	0	0		0	0	0	0	0	0	0	0	0	0	0	0	0	0	0	0		0	0	0	0	0	0	0	0	0	0	0	0	0	0	0	0		1	1	2	1	2	0
1349	AC203183.3_FG001	0	0	0	0	0	0	0		0	0	0	0	0	0	0	0	0	0	0	0	0	0	0	0		0	0	0	0	0	0	0	0	0	0	0	0	0	0	0	0		0	0	0	0	0	0
1350	AC203208.4_FG001	0	0	0	0	0	0	0		0	0	0	0	0	0	0	0	0	0	0	0	0	0	0	0		0	0	0	0	0	0	0	0	0	0	0	0	0	0	0	0		0	0	0	0	0	0
1351	AC203220.3_FG006	0	0	0	0	0	1	0		1	0	0	0	0	0	0	0	0	3	1	2	0	5	0	3		0	1	0	1	0	0	0	2	0	2	0	2	0	3	0	1		1	7	3	4	2	5
1352	AC203227.3_FG001	0	0	0	0	0	0	0		0	0	0	0	0	0	0	0	0	0	0	0	0	0	0	0		0	0	0	0	0	0	0	0	0	0	0	0	0	0	0	0		0	2	0	0	1	0
1353	AC203228.3_FG003	0	0	0	0	0	0	0		0	0	0	0	0	0	0	0	0	0	0	0	0	0	0	0		0	0	0	0	0	0	0	0	0	0	0	0	0	0	0	0		0	1	0	0	0	0
1354	AC203237.3_FG001	0	0	0	0	0	0	0		0	0	0	0	0	0	0	0	0	0	0	0	0	0	0	0		0	0	0	0	0	0	0	0	1	0	0	0	0	0	0	0		0	0	0	1	0	0
1355	AC203244.4_FG001	0	0	0	0	0	0	0		0	0	0	0	0	0	0	0	0	0	0	0	0	0	0	0		0	0	0	1	0	0	0	0	0	1	0	0	0	0	0	0		0	0	0	3	0	1
1356	AC203253.4_FG001	0	0	0	0	0	0	0		0	0	0	0	0	0	0	0	0	0	0	0	0	0	0	0		0	0	0	0	0	0	0	0	0	0	0	0	0	0	0	0		0	0	0	0	0	0
1357	AC203257.2_FG003	0	0	0	0	0	0	0		0	0	0	0	0	0	0	0	0	0	0	0	0	0	0	0		0	0	0	0	0	0	0	0	0	0	0	0	0	0	0	0		0	0	0	0	0	0
1358	AC203260.3_FG003	0	0	0	0	0	0	0		0	0	0	0	0	0	0	0	0	0	0	0	0	0	0	0		0	0	0	0	0	0	0	0	0	0	0	0	0	0	0	0		1	1	0	1	0	1
1359	AC203262.3_FG002	0	0	0	0	0	0	0		0	0	0	0	0	0	0	0	0	0	0	0	0	0	0	0		0	0	0	0	0	0	0	0	0	0	0	0	0	0	1	0		0	0	0	0	0	0
1360	AC203265.3_FG002	0	0	0	0	0	0	0		0	0	0	0	0	0	0	0	0	0	0	0	0	0	0	0		0	0	0	0	0	0	0	0	0	0	0	0	0	0	0	0		0	0	0	0	0	0
1361	AC203278.4_FG004	0	0	0	0	0	0	0		0	0	0	0	0	0	0	0	0	0	0	0	0	0	0	0		0	0	1	0	0	0	0	0	0	0	0	0	0	0	0	1		0	0	3	1	2	3
1362	AC203280.3_FG001	0	0	0	0	0	0	0		0	0	1	0	0	0	1	0	1	0	0	0	1	0	1	0		0	0	0	0	1	0	1	0	0	0	0	0	1	0	1	0		0	2	1	0	1	0
1363	AC203294.3_FG001	0	0	0	0	0	0	0		1	0	0	0	1	0	0	0	0	0	0	0	0	0	0	0		0	0	0	0	0	0	0	0	0	0	0	0	0	0	0	0		13	6	9	4	19	7
1364	AC203294.3_FG008	0	0	0	0	0	0	0		2	0	6	0	5	0	5	0	0	0	0	0	0	1	0	4		0	0	0	0	2	0	1	0	0	0	2	0	3	0	1	0		13	2	3	5	10	0
1365	AC203294.3_FG012	0	0	0	0	0	0	0		0	0	0	0	0	0	0	0	0	0	0	0	0	0	0	0		0	0	0	0	0	0	0	0	0	0	0	0	0	0	0	0		19	6	9	7	19	2
1366	AC203306.3_FG003	0	0	0	0	0	0	0		0	0	0	0	0	0	0	0	0	0	1	0	0	0	0	0		0	0	0	0	0	0	0	0	0	0	0	0	0	0	0	0		1	1	1	0	0	2
1367	AC203307.4_FG001	0	0	0	0	0	0	0		2	0	1	0	2	0	0	0	0	1	0	1	0	0	1	2		3	1	1	1	0	0	1	0	1	0	1	1	0	0	0	0		3	3	10	3	6	3
1368	AC203311.3_FG005	0	0	0	0	0	0	0		0	0	0	0	0	0	0	0	0	0	0	0	0	0	0	0		0	0	0	0	0	0	0	0	0	0	0	0	0	0	0	0		0	0	0	0	0	0
1369	AC203316.3_FG003	0	0	0	0	0	0	0		0	0	0	0	0	0	0	0	0	0	0	0	0	0	0	0		0	0	0	0	0	0	0	0	0	0	0	0	0	0	0	0		1	1	0	0	1	1
1370	AC203316.3_FG004	0	0	0	0	0	0	0		0	0	0	0	0	0	0	0	0	0	0	0	0	0	0	0		0	0	0	0	0	0	0	0	0	0	0	0	0	0	0	0		3	1	0	1	1	0
1371	AC203324.3_FG008	0	0	0	0	0	0	0		0	0	0	0	0	0	0	0	0	0	0	0	0	0	0	0		0	0	0	0	0	0	0	0	0	0	0	0	0	0	0	0		1	1	1	2	1	2
1372	AC203332.3_FG001	0	0	0	0	0	0	0		0	0	0	0	0	0	0	0	0	0	0	0	0	0	0	0		0	0	0	0	0	0	0	0	0	0	0	0	0	0	0	0		1	0	0	1	0	1
1373	AC203341.3_FG003	0	0	0	0	0	0	0		0	0	0	0	0	0	0	0	0	0	0	0	0	0	0	0		0	0	0	0	0	0	0	0	0	0	1	0	0	0	0	0		0	0	0	0	0	0
1374	AC203359.3_FG001	0	0	1	0	0	0	0		0	0	0	0	0	0	0	0	0	2	1	4	0	0	0	0		0	2	0	1	0	1	0	0	0	1	0	3	0	1	0	2		0	20	12	10	0	17
1375	AC203363.3_FG007	0	0	0	0	0	0	0		0	0	0	0	0	0	0	0	0	0	0	0	0	0	0	0		0	0	0	0	0	0	0	0	0	0	0	0	0	0	0	0		0	0	1	0	1	1
1376	AC203365.3_FG004	0	0	0	0	0	0	0		1	0	3	0	3	0	0	0	0	1	0	0	0	0	0	0		1	0	0	0	0	0	0	0	2	0	1	0	1	0	0	0		6	3	4	2	6	0
1377	AC203365.3_FG007	0	0	0	0	0	0	0		1	0	3	0	0	0	0	0	0	0	0	0	0	0	0	0		2	0	1	0	0	0	0	0	1	0	0	0	0	0	0	0		3	1	4	3	7	3
1378	AC203366.4_FG001	0	0	0	0	1	0	0		5	0	9	0	8	0	3	0	0	5	0	9	1	5	0	5		7	3	9	2	2	1	3	1	14	7	6	5	6	6	1	2		247	254	268	367	265	259
1379	AC203381.3_FG006	0	0	0	0	0	0	0		0	0	0	0	2	0	0	0	0	0	0	0	0	0	0	0		0	0	0	0	0	0	0	2	0	0	0	0	0	0	1	0		1	0	0	0	0	0
1380	AC203382.3_FG005	0	0	0	0	0	0	0		0	0	0	0	0	0	0	0	0	0	0	0	1	0	0	0		1	0	1	0	0	0	1	0	0	0	0	0	0	0	0	0		0	1	2	0	0	0
1381	AC203392.3_FG004	0	0	0	0	0	0	0		88	0	82	1	71	0	83	0	1	68	1	58	1	74	2	73		47	43	39	35	35	51	46	63	55	40	44	55	29	39	56	42		358	320	370	253	300	298
1382	AC203394.3_FG004	0	0	0	0	0	0	0		0	0	2	0	0	0	2	0	1	2	0	0	0	1	0	5		0	0	0	1	0	1	1	2	0	2	0	2	0	2	2	0		20	17	20	22	25	11
1383	AC203401.3_FG003	0	0	0	0	0	0	0		0	0	0	0	0	0	0	0	0	0	0	0	0	0	0	0		0	0	0	0	0	0	0	0	0	0	0	0	0	0	0	0		2	2	2	3	0	1
1384	AC203408.4_FG003	0	0	0	0	0	0	0		2	0	0	0	0	0	0	0	1	0	0	0	0	0	0	0		1	0	0	0	0	0	0	0	0	0	1	0	0	0	0	0		3	2	1	3	1	4
1385	AC203423.3_FG009	0	0	0	0	0	0	0		0	0	0	0	0	0	0	0	0	0	0	0	0	0	0	0		0	0	0	0	0	0	0	0	0	0	0	0	0	0	0	0		0	1	0	0	1	0
1386	AC203424.3_FG001	0	0	0	0	1	1	1		219	1	185	0	131	0	117	0	1	133	0	121	1	113	0	103		104	83	103	70	111	54	81	51	137	109	97	90	91	59	82	65		787	543	812	824	698	519
1387	AC203430.3_FG007	0	0	0	0	0	0	0		0	0	0	0	0	0	0	0	0	0	0	0	0	0	0	0		0	0	0	0	0	0	0	0	0	0	0	0	0	1	0	0		2	6	7	5	3	5
1388	AC203437.2_FG002	0	0	0	0	0	0	0		0	0	0	0	0	0	0	0	0	0	0	0	0	0	0	0		0	0	0	0	0	0	0	0	0	0	0	0	0	0	0	0		2	0	0	1	0	0
1389	AC203439.3_FG005	0	0	0	0	0	0	0		0	0	0	0	0	0	1	0	0	0	0	0	0	0	0	0		0	0	0	0	0	0	0	0	0	0	0	0	0	0	0	0		16	5	7	2	10	6
1390	AC203531.3_FG002	0	0	0	0	0	0	0		0	0	0	0	0	0	0	0	0	0	0	0	0	0	0	0		0	0	0	0	0	0	0	0	0	0	0	0	0	0	0	0		0	0	0	0	0	2
1391	AC203535.4_FG001	0	0	0	0	0	0	0		36	0	38	0	8	0	4	0	0	28	0	25	0	9	0	16		12	19	27	18	5	3	4	4	26	23	19	18	4	2	6	6		1342	1655	1382	1661	1440	1522
1392	AC203535.4_FG002	0	0	0	0	1	0	0		91	1	82	0	67	0	78	1	1	30	0	41	1	37	0	55		41	22	37	16	28	15	38	25	25	19	35	23	30	25	19	17		380	193	284	201	320	190
1393	AC203535.4_FG004	0	0	0	0	0	0	0		2	0	1	0	3	0	1	0	0	2	1	2	0	2	0	2		1	1	1	3	1	2	1	1	0	0	0	0	3	1	0	0		31	22	18	10	17	23
1394	AC203535.4_FG006	0	0	0	0	0	0	0		1	0	0	0	0	0	0	0	0	1	0	0	0	0	0	0		0	1	0	0	0	1	0	1	0	1	0	1	0	2	0	1		1	5	11	5	1	7
1395	AC203535.4_FG007	0	0	0	0	0	0	0		0	0	0	0	0	0	0	0	0	0	0	0	0	0	0	0		0	0	0	0	0	0	0	0	0	0	0	0	0	0	0	0		0	0	0	0	0	0
1396	AC203570.4_FG005	0	0	0	0	0	0	0		0	0	0	0	0	0	0	0	0	0	0	0	0	0	0	0		0	0	0	0	0	0	0	0	0	0	0	0	0	0	0	0		49	29	28	47	37	27
1397	AC203571.3_FG001	0	0	0	0	0	0	0		0	0	0	0	0	0	0	0	0	0	0	0	0	0	0	0		0	0	0	0	0	0	0	0	0	0	0	0	0	0	0	0		29	18	32	22	33	9
1398	AC203571.3_FG007	0	0	0	0	0	0	0		0	0	0	0	0	0	0	0	0	0	0	0	0	0	0	0		0	0	0	0	0	0	0	0	0	0	0	0	0	0	0	0		0	0	1	0	1	0
1399	AC203672.3_FG001	0	0	0	0	0	0	0		0	0	0	0	0	0	0	0	0	0	0	0	0	0	0	0		0	0	0	0	0	0	0	0	0	0	0	0	0	0	0	0		0	1	0	1	0	3
1400	AC203748.3_FG002	0	0	0	0	0	0	0		0	0	0	0	0	0	0	0	0	0	0	0	0	0	0	0		0	0	0	0	0	0	1	0	0	0	1	0	0	0	0	0		0	0	0	0	0	0
1401	AC203752.5_FG002	0	0	0	0	0	0	0		0	0	0	0	0	0	0	0	0	0	0	0	0	0	0	0		0	0	0	0	0	0	0	0	0	0	0	0	0	0	0	0		50	92	68	72	63	86
1402	AC203753.4_FG006	0	0	0	0	0	0	0		2	0	0	0	1	0	0	0	0	2	2	0	0	0	0	0		1	1	3	0	0	0	0	0	2	0	0	0	0	0	0	0		9	13	7	8	10	5
1403	AC203753.4_FG007	0	0	0	0	0	0	0		0	0	0	0	0	0	0	0	0	0	0	0	0	0	0	0		0	0	0	0	0	0	0	0	0	0	0	0	0	0	0	0		1	0	0	0	0	0
1404	AC203754.4_FG007	0	0	0	0	0	0	0		0	0	0	0	0	0	0	0	0	0	0	0	0	0	0	0		0	0	0	0	0	0	0	0	0	0	0	0	0	0	0	0		0	1	0	0	0	0
1405	AC203754.4_FG008	0	0	0	0	0	0	0		7	0	8	0	0	0	1	0	1	2	0	4	0	3	0	2		4	6	3	3	1	0	0	0	2	2	4	2	3	1	1	3		100	191	149	177	138	168
1406	AC203761.3_FG002	0	0	0	0	0	0	0		0	0	0	0	0	0	0	0	0	0	0	0	0	0	0	0		0	0	0	0	0	0	0	0	0	0	0	0	0	0	0	0		143	228	199	254	234	232
1407	AC203768.3_FG005	0	0	0	0	0	0	0		0	0	0	0	0	0	0	0	0	0	0	0	0	0	0	0		0	0	0	0	0	0	0	0	0	0	0	0	0	0	0	0		1	6	3	2	0	7
1408	AC203774.3_FG004	0	0	0	0	0	0	0		0	0	0	0	0	0	0	0	0	0	0	0	0	0	0	0		0	0	0	0	0	0	0	0	0	0	1	0	0	0	0	0		2	2	2	4	1	1
1409	AC203777.3_FG001	0	0	0	0	0	0	0		0	0	0	0	0	0	0	0	0	0	1	0	0	0	0	0		0	0	0	0	0	0	0	0	0	0	0	0	0	0	0	0		1	1	0	1	0	2
1410	AC203777.3_FG004	0	0	0	0	0	0	0		0	0	0	0	0	0	0	0	0	0	0	0	0	0	0	0		0	0	0	0	0	0	0	0	0	0	0	0	0	0	0	0		0	0	0	0	1	0
1411	AC203790.3_FG004	0	0	0	0	0	0	0		0	0	0	0	0	0	0	0	0	0	0	0	0	0	0	0		0	0	0	0	0	0	0	0	0	0	0	0	0	0	0	0		0	0	0	0	0	0
1412	AC203802.2_FG005	0	0	0	0	0	0	0		0	0	0	0	0	0	0	0	0	0	0	0	0	0	0	0		0	0	0	0	0	0	0	0	0	0	0	0	0	0	0	0		0	0	0	0	0	1
1413	AC203804.4_FG008	0	0	0	0	0	0	0		0	0	0	0	0	0	0	0	0	0	0	0	0	0	0	0		0	0	0	0	0	0	0	0	0	0	0	0	0	0	0	0		0	0	1	0	1	1
1414	AC203806.3_FG006	0	0	0	0	0	0	0		0	0	0	0	0	0	0	0	0	0	0	0	0	0	0	0		0	0	0	0	0	0	0	0	0	0	0	0	0	0	0	0		0	0	0	3	1	0
1415	AC203831.3_FG002	0	0	0	0	0	0	0		0	0	0	0	0	0	0	0	0	0	0	0	0	0	0	0		0	0	0	0	0	0	0	0	0	0	0	0	0	0	0	0		4	7	11	5	12	3
1416	AC203834.4_FG004	0	0	0	0	0	0	0		0	0	0	0	0	0	0	0	0	0	0	0	0	0	0	0		0	0	0	0	0	0	0	0	0	0	0	0	0	0	0	0		2	0	0	0	0	0
1417	AC203841.3_FG002	0	0	0	0	1	0	0		20	0	8	0	11	0	5	0	0	13	0	13	0	22	1	18		4	8	6	4	2	6	2	14	8	8	10	5	5	9	6	17		69	106	94	95	47	82
1418	AC203841.3_FG009	0	0	0	0	1	1	1		190	0	191	0	158	0	176	0	1	88	0	110	2	107	2	108		102	55	138	49	133	68	127	69	139	83	110	49	101	80	130	83		759	473	653	799	684	472
1419	AC203847.3_FG004	0	0	0	0	0	0	0		0	0	0	0	0	0	0	0	0	0	0	0	0	0	0	0		0	0	0	0	0	0	0	0	0	0	0	0	0	0	0	0		0	0	0	0	0	0
1420	AC203847.3_FG009	0	0	0	0	0	0	0		0	0	0	0	0	0	0	0	0	0	0	0	0	0	0	0		0	0	0	0	0	0	0	0	0	0	0	0	0	0	0	0		0	1	1	1	0	0
1421	AC203855.2_FG001	0	0	0	0	0	0	0		0	0	0	0	0	0	0	0	0	0	0	0	0	0	0	0		0	0	0	0	0	0	0	0	0	0	0	0	0	0	0	0		1	0	1	1	0	0
1422	AC203862.4_FG001	0	0	0	0	0	0	0		5	0	5	0	5	0	4	0	0	0	0	0	0	4	0	1		4	1	0	2	4	3	1	3	1	2	0	1	1	2	3	2		92	37	53	56	61	27
1423	AC203862.4_FG002	0	0	0	0	0	0	0		0	0	0	0	0	0	0	0	0	0	0	0	0	0	0	0		0	0	0	0	0	0	0	0	0	0	0	0	0	0	0	0		135	122	107	125	130	121
1424	AC203865.3_FG001	0	0	0	0	0	0	0		1	0	2	0	0	0	0	0	0	0	0	0	0	1	0	0		2	0	1	0	1	0	3	0	1	0	0	0	1	1	0	0		104	54	78	78	74	43
1425	AC203900.3_FG006	0	0	0	0	0	0	0		0	0	0	0	0	0	0	0	0	0	0	0	0	0	0	0		0	0	0	0	0	0	0	0	0	1	0	0	0	0	0	0		2	0	1	3	0	0
1426	AC203909.3_FG003	0	0	0	0	0	0	0		0	0	0	0	0	0	0	0	1	5	0	1	0	2	0	4		0	2	0	3	0	0	0	2	0	2	0	0	1	3	0	4		7	17	14	13	4	21
1427	AC203909.3_FG006	0	0	0	0	0	0	0		0	0	0	0	0	0	0	0	0	0	0	0	0	0	0	0		0	0	0	0	0	0	0	0	0	0	0	0	0	0	0	0		0	0	0	1	0	0
1428	AC203909.3_FG007	0	0	0	0	0	0	0		1	0	1	0	0	0	2	0	1	0	0	1	0	3	0	2		0	0	0	0	0	0	0	0	0	1	0	1	0	0	0	0		3	4	2	4	2	3
1429	AC203909.3_FG010	0	0	0	0	0	0	0		0	0	0	0	0	0	0	0	0	0	0	0	0	0	0	0		0	0	0	0	0	0	0	0	0	0	0	0	0	0	0	0		2	1	1	1	0	0
1430	AC203925.3_FG002	0	0	0	0	0	0	0		0	0	0	0	0	0	0	0	0	0	0	0	0	0	0	0		0	0	0	0	0	0	0	0	0	0	0	0	0	0	0	0		0	1	1	1	0	2
1431	AC203928.4_FG001	0	0	0	0	0	0	0		0	0	0	0	0	0	0	0	0	0	0	0	0	0	0	0		0	0	0	0	0	0	0	0	0	0	0	0	0	0	0	0		0	1	0	1	1	0
1432	AC203944.4_FG002	0	0	0	0	0	0	0		0	0	0	0	0	0	0	0	0	0	0	0	0	0	0	0		0	0	0	0	0	0	0	0	0	0	0	0	0	0	0	0		0	0	3	0	1	0
1433	AC203955.3_FG002	0	0	0	0	0	0	0		0	0	0	0	0	0	0	0	0	0	0	0	0	0	0	0		0	0	0	0	0	0	0	0	0	0	0	0	0	0	0	0		0	0	1	0	1	2
1434	AC203955.3_FG005	0	0	0	0	0	0	0		0	0	0	0	0	0	0	0	0	0	0	0	0	0	0	0		0	0	0	0	0	0	0	0	0	0	1	0	0	0	0	0		1	7	4	0	0	2
1435	AC203956.3_FG004	0	0	0	0	0	0	0		0	0	0	0	0	0	0	0	0	0	0	0	0	0	0	0		0	0	0	0	0	0	0	0	0	0	0	0	0	0	0	0		2	5	5	6	1	7
1436	AC203957.3_FG001	0	0	0	0	0	0	0		0	0	0	0	0	0	0	0	0	0	0	0	0	0	0	0		0	0	0	0	0	0	0	0	0	0	0	0	0	0	0	0		1	5	4	5	3	5
1437	AC203957.3_FG004	0	0	0	0	0	1	0		36	0	37	0	34	0	37	0	0	37	0	27	1	40	0	51		10	15	6	12	23	22	18	26	10	21	8	15	16	22	11	19		83	70	52	78	87	56
1438	AC203966.5_FG002	0	0	0	0	0	0	0		0	0	0	0	0	0	0	0	0	0	0	0	0	0	0	0		0	0	0	0	0	0	0	0	0	0	0	0	0	0	0	0		17	33	30	27	15	25
1439	AC203966.5_FG003	0	0	0	0	0	0	0		0	0	0	0	0	0	0	0	0	0	0	0	0	0	0	0		0	0	0	0	0	0	0	0	0	0	0	0	0	0	0	0		74	48	79	68	54	57
1440	AC203966.5_FG005	0	0	0	0	0	0	0		14	0	9	0	10	0	14	0	0	3	0	3	0	16	0	14		6	6	0	2	5	4	4	4	12	4	2	2	5	7	6	3		318	223	328	288	218	211
1441	AC203966.5_FG006	0	0	0	0	0	0	0		0	0	0	0	0	0	0	0	0	0	1	0	0	0	0	0		0	0	0	0	0	0	0	0	0	0	0	0	0	0	0	0		4	2	0	1	2	4
1442	AC203972.3_FG001	0	0	0	0	1	1	1		30	1	28	0	13	0	9	0	0	33	0	31	0	7	0	9		8	17	9	24	3	4	2	3	9	22	4	17	1	6	3	8		114	132	98	139	107	128
1443	AC203972.3_FG003	0	0	0	0	0	0	0		1	0	0	0	0	0	1	0	0	2	0	4	0	3	0	2		0	1	0	0	0	1	0	1	0	4	0	2	0	1	0	0		7	10	8	7	6	7
1444	AC203976.4_FG001	0	0	0	0	0	0	0		0	0	0	0	0	0	0	0	0	0	0	0	0	0	0	0		0	0	0	0	0	0	0	0	0	0	0	0	0	0	0	0		0	1	2	1	0	0
1445	AC203980.3_FG003	0	0	0	0	0	0	0		0	0	0	0	0	0	0	0	0	0	0	0	0	0	0	0		0	0	0	0	0	0	0	0	0	0	0	0	0	0	0	0		1	1	1	0	0	1
1446	AC203985.4_FG001	0	0	0	0	0	0	0		0	0	0	0	0	0	0	0	0	0	0	0	0	0	0	0		0	0	0	0	0	0	0	0	0	0	0	0	0	0	0	0		18	20	8	15	17	7
1447	AC203985.4_FG005	0	0	0	0	0	0	0		0	0	0	0	0	0	0	0	0	0	0	0	0	0	0	0		0	0	0	0	0	0	0	0	0	0	0	0	0	0	0	0		523	386	509	401	411	347
1448	AC203986.3_FG013	0	0	0	0	0	0	0		0	0	0	0	0	0	0	0	0	0	0	0	0	0	0	0		0	0	0	0	0	0	0	0	0	0	0	0	0	0	0	0		1	1	1	0	0	0
1449	AC203989.4_FG001	0	0	0	0	1	0	0		70	1	42	1	56	0	90	0	0	21	0	19	0	48	0	44		23	11	10	8	28	9	32	14	19	9	7	11	12	6	9	14		248	70	128	95	131	103
1450	AC204007.3_FG001	0	0	0	0	0	0	0		0	0	0	0	0	0	0	0	0	0	0	0	0	0	0	0		0	0	0	0	0	0	0	0	0	0	0	0	0	0	0	0		0	0	0	0	1	0
1451	AC204007.3_FG008	0	0	0	0	0	1	0		30	1	31	0	39	0	40	0	0	16	0	12	1	21	1	15		17	11	3	2	16	7	21	20	20	7	20	6	25	10	27	13		94	54	74	72	78	53
1452	AC204009.3_FG009	0	0	0	0	0	0	0		0	0	0	0	0	0	0	0	0	0	0	0	0	0	0	0		0	0	0	0	1	0	1	0	0	0	0	0	0	0	0	0		1	0	2	1	2	0
1453	AC204015.3_FG006	0	0	0	0	0	0	0		0	0	0	0	0	0	0	0	0	0	0	0	0	0	0	0		0	0	0	0	0	0	0	0	0	0	0	0	0	0	0	0		0	1	2	0	1	3
1454	AC204017.4_FG003	0	0	0	0	0	0	0		0	0	0	0	0	0	0	0	0	0	0	0	0	0	0	0		0	0	0	0	0	0	0	0	0	0	0	0	0	0	0	0		1	10	8	9	0	6
1455	AC204035.3_FG003	0	0	0	0	0	0	0		0	0	0	0	0	0	0	0	0	0	0	0	0	0	0	0		0	0	0	0	0	0	0	0	0	0	0	0	0	0	0	0		0	0	0	1	0	0
1456	AC204048.3_FG002	0	0	0	0	0	0	0		1	1	1	0	1	0	3	0	0	5	0	4	0	9	1	5		1	2	0	2	4	3	0	3	4	1	1	3	5	8	2	5		5	10	13	15	3	9
1457	AC204050.4_FG006	0	0	0	0	0	1	0		0	1	2	1	1	0	0	0	0	3	0	2	0	4	0	9		2	1	2	2	1	0	2	1	2	0	4	0	1	1	1	0		13	17	5	8	9	12
1458	AC204051.3_FG001	0	0	0	0	0	0	0		0	0	0	0	0	0	0	0	0	0	0	0	0	0	0	0		0	0	0	0	0	0	0	0	0	0	0	0	0	0	0	0		0	1	0	0	0	0
1459	AC204060.3_FG010	0	0	0	0	0	0	0		0	0	0	0	0	0	0	0	0	0	0	0	0	0	0	0		0	0	0	0	0	0	0	0	0	0	0	0	0	0	0	0		0	1	0	0	0	0
1460	AC204070.3_FG004	0	0	0	0	0	0	0		5	0	13	0	0	0	0	0	0	8	0	11	1	2	0	0		4	5	10	4	0	0	1	0	7	4	11	4	0	1	0	1		23	44	35	37	38	54
1461	AC204088.3_FG010	0	0	0	0	0	0	0		0	0	0	0	0	0	0	0	0	0	0	0	0	0	0	0		0	0	0	0	0	0	0	0	0	0	0	0	0	0	0	0		1	1	0	0	1	1
1462	AC204212.4_FG001	0	0	0	0	0	0	0		2	0	1	0	4	0	3	0	0	2	0	1	0	4	0	8		0	0	1	1	2	0	2	2	1	0	0	0	0	1	0	0		19	11	11	4	8	14
1463	AC204213.1_FG007	0	0	0	0	0	0	0		0	0	0	0	0	0	0	0	0	0	0	0	0	0	0	0		0	0	0	0	0	0	0	0	0	0	0	0	0	0	0	0		0	0	0	0	0	2
1464	AC204231.3_FG010	0	0	0	0	0	0	0		0	0	0	0	0	0	0	0	0	0	0	0	0	0	0	0		0	0	0	0	0	0	0	0	0	0	0	0	0	0	0	0		0	0	0	0	0	0
1465	AC204252.3_FG001	0	0	0	0	0	0	0		0	0	0	0	0	0	0	0	0	0	0	0	0	0	0	0		0	0	0	0	0	0	0	0	0	0	0	0	0	0	0	0		0	0	0	0	0	0
1466	AC204254.3_FG001	0	0	0	0	1	1	1		14	0	14	0	7	0	7	0	0	3	0	1	0	1	0	2		13	2	2	1	4	0	1	1	3	2	9	2	4	2	3	1		24	10	28	9	25	6
1467	AC204271.3_FG003	0	0	0	0	1	1	1		19	1	29	0	27	0	26	0	0	4	0	8	0	25	0	19		15	5	22	4	20	15	27	7	18	10	29	15	26	10	34	12		33	17	35	49	44	17
1468	AC204277.3_FG006	0	0	0	0	1	0	0		40	0	28	0	33	0	53	0	0	55	0	32	0	51	1	54		27	32	21	31	20	33	20	23	31	36	24	31	23	32	23	30		777	701	806	795	664	619
1469	AC204292.4_FG002	0	0	0	0	0	0	0		11	0	21	0	10	0	11	1	1	22	0	11	1	12	0	11		4	9	17	7	9	7	3	12	11	10	20	9	9	7	9	7		65	102	75	88	88	85
1470	AC204292.4_FG003	0	0	0	0	0	0	0		6	0	2	0	5	0	10	0	0	1	0	4	0	8	0	8		1	0	1	2	3	2	3	3	3	0	4	2	3	5	3	3		16	12	18	14	10	22
1471	AC204292.4_FG005	0	0	0	0	0	0	0		0	0	0	0	0	0	0	0	0	0	0	0	0	0	0	0		0	0	0	0	0	0	0	0	0	0	0	0	0	0	0	0		0	0	0	0	0	0
1472	AC204292.4_FG006	0	0	0	0	0	0	0		0	0	0	0	0	0	0	0	1	0	0	0	0	0	1	0		0	0	0	0	0	0	0	0	0	0	0	0	0	0	0	0		0	1	4	1	1	2
1473	AC204298.3_FG006	0	0	0	0	0	0	0		1	0	1	0	0	0	0	0	0	3	0	3	0	0	0	0		1	2	2	2	0	0	0	0	1	0	0	1	0	0	0	0		7	9	9	8	4	12
1474	AC204300.3_FG003	0	0	0	0	0	0	0		0	0	0	0	0	0	0	0	0	0	0	0	0	0	0	0		0	0	0	0	0	0	0	0	0	0	0	0	0	0	0	0		3	2	1	1	2	2
1475	AC204300.3_FG009	0	0	0	0	0	0	0		0	0	0	0	0	0	0	0	0	0	0	0	0	0	0	0		0	0	0	0	0	0	0	0	0	0	0	0	0	0	0	0		0	0	2	0	0	0
1476	AC204306.3_FG007	0	0	0	0	0	0	0		0	0	0	0	2	0	2	0	0	0	0	0	0	0	0	0		0	0	0	0	0	0	0	0	0	0	0	0	0	0	0	0		6	1	2	0	0	0
1477	AC204311.4_FG004	0	0	0	0	0	0	0		0	0	0	0	0	0	0	0	0	0	0	0	0	0	0	0		0	0	0	0	0	0	0	0	0	0	0	0	0	0	0	0		6	7	4	9	7	8
1478	AC204325.3_FG003	0	0	0	0	0	0	0		0	0	0	0	0	0	0	0	0	0	0	0	0	0	0	0		0	0	0	0	0	0	0	0	0	0	0	0	0	0	0	0		1	1	2	0	3	1
1479	AC204351.3_FG004	0	0	0	0	0	0	0		0	0	0	0	0	0	0	0	0	0	0	0	0	0	0	0		0	0	0	0	0	0	0	0	0	0	0	0	0	0	0	0		0	0	0	0	0	0
1480	AC204352.3_FG012	0	0	0	0	0	0	0		1	0	0	1	0	0	0	0	0	1	0	1	0	0	0	0		0	0	0	0	0	0	0	0	0	1	0	0	0	0	0	0		3	2	3	2	4	2
1481	AC204359.3_FG004	0	0	0	0	0	0	0		0	0	0	0	0	0	0	0	0	0	0	0	0	0	0	0		0	0	0	0	0	0	0	0	0	0	0	0	0	0	0	0		0	0	1	0	1	0
1482	AC204359.3_FG005	0	0	0	0	1	1	1		25	0	27	1	29	0	40	0	0	7	1	4	0	9	0	10		16	4	7	4	14	5	20	6	15	4	9	4	10	6	21	5		330	239	275	249	249	205
1483	AC204377.3_FG001	0	0	0	0	0	0	0		0	0	0	0	0	0	0	0	0	0	0	0	0	0	0	0		0	0	0	0	0	0	0	0	0	0	0	0	0	0	0	0		0	0	1	0	1	1
1484	AC204381.3_FG001	0	0	0	0	0	0	0		1	0	1	0	0	0	1	0	0	0	0	0	0	0	0	0		0	0	1	0	0	0	0	0	1	0	0	2	0	0	0	0		7	1	1	2	2	1
1485	AC204383.2_FG002	0	0	0	0	0	0	0		0	0	0	0	0	0	0	0	0	0	0	0	0	0	0	0		0	0	0	0	0	0	0	0	0	0	0	0	0	0	0	0		0	1	1	0	0	0
1486	AC204387.3_FG002	0	0	0	0	0	0	0		0	0	0	0	0	0	0	0	0	0	0	0	0	0	0	0		0	0	0	0	0	0	0	0	0	0	0	0	0	0	0	0		0	0	0	0	1	0
1487	AC204437.3_FG004	0	0	0	0	0	0	0		3	0	3	0	5	0	6	0	0	1	0	3	0	4	0	6		1	2	1	1	2	1	2	0	1	2	3	0	3	2	1	2		25	11	21	7	10	10
1488	AC204472.3_FG002	0	0	0	0	0	0	0		1	0	1	0	2	0	0	0	0	0	0	1	0	0	0	0		0	0	1	1	0	0	1	0	0	0	2	0	0	0	1	1		8	2	7	11	7	6
1489	AC204476.3_FG004	0	0	0	0	0	0	0		0	0	0	0	0	0	0	0	0	0	0	0	0	0	0	0		0	0	0	0	0	0	0	0	0	0	0	0	0	0	0	0		0	0	0	0	0	0
1490	AC204502.4_FG006	0	0	0	0	1	0	0		6	0	6	0	19	0	28	0	1	1	0	3	0	1	0	2		1	1	1	3	6	2	11	1	1	1	1	0	4	4	7	2		36	6	15	14	26	8
1491	AC204515.4_FG003	0	0	0	0	0	0	0		0	0	0	0	0	0	0	0	0	0	0	0	0	0	0	0		0	0	0	0	0	0	0	0	0	0	0	0	0	0	0	0		1	0	0	3	0	1
1492	AC204515.4_FG006	0	0	0	0	1	0	0		8	0	3	0	3	0	2	1	0	2	0	2	0	0	0	3		5	0	4	1	6	1	7	1	3	2	2	0	6	2	0	0		40	25	25	43	24	29
1493	AC204519.3_FG003	0	0	0	0	0	0	0		0	0	0	0	0	0	0	0	0	0	0	0	0	0	0	0		0	0	1	0	1	0	1	0	0	0	0	0	0	0	0	0		3	1	1	2	2	0
1494	AC204520.3_FG005	0	0	0	0	0	0	0		0	0	0	0	0	0	0	0	0	0	0	0	0	0	0	0		0	0	0	0	0	0	0	0	0	0	0	0	0	0	0	0		1	0	0	0	2	0
1495	AC204530.4_FG002	0	0	0	0	0	0	0		0	0	0	0	0	0	0	0	0	0	0	0	0	0	0	0		0	0	0	0	0	0	0	0	0	0	0	0	0	0	0	0		398	527	341	496	416	441
1496	AC204530.4_FG003	0	0	0	0	0	0	0		0	0	0	0	0	0	0	0	0	0	0	0	0	0	0	0		0	0	0	0	0	0	0	0	0	0	0	0	0	0	0	0		1	3	3	1	0	1
1497	AC204530.4_FG006	0	0	0	0	0	1	0		9	0	9	0	6	0	7	0	1	15	0	15	0	10	0	15		5	7	3	9	6	9	5	5	9	11	6	9	4	11	6	11		92	124	110	142	95	114
1498	AC204539.4_FG001	0	0	0	0	0	0	0		0	0	0	0	0	0	0	0	0	0	0	0	0	0	0	0		0	0	0	0	0	0	0	0	0	0	0	0	0	0	0	0		0	0	0	0	0	0
1499	AC204539.4_FG002	0	0	0	0	0	0	0		3	0	2	0	0	0	1	0	0	0	0	0	0	0	0	0		2	0	1	0	0	0	0	0	1	0	2	0	0	0	0	0		10	2	5	5	4	1
1500	AC204539.4_FG003	0	0	0	0	1	0	0		2	0	4	0	1	0	1	0	0	7	0	3	0	2	1	2		2	12	0	5	0	1	0	1	6	2	1	1	1	1	3	3		9	76	64	63	10	75
1501	AC204540.3_FG001	0	0	0	0	0	0	0		0	0	0	0	0	0	0	0	0	0	0	0	0	0	0	0		0	0	0	0	0	0	0	0	0	0	0	0	0	0	0	0		0	0	0	0	0	0
1502	AC204552.3_FG001	0	0	0	0	0	0	0		0	0	0	0	0	0	0	0	0	0	0	0	0	0	0	0		0	0	0	0	0	0	0	0	0	0	0	0	0	0	0	0		1	6	3	2	0	14
1503	AC204563.3_FG011	0	0	0	0	0	0	0		0	0	0	0	0	0	0	0	0	0	0	0	0	0	0	0		0	0	0	0	0	0	0	0	0	0	0	0	0	0	0	0		0	0	1	0	1	2
1504	AC204569.3_FG002	0	0	0	0	0	0	0		0	0	0	0	0	0	0	0	0	0	0	0	0	0	0	0		0	0	0	0	0	0	0	0	0	0	0	0	0	0	0	0		0	0	0	0	0	0
1505	AC204573.3_FG002	0	0	0	0	0	0	0		0	0	0	0	0	0	0	0	0	0	0	0	0	0	0	0		1	0	0	0	0	0	0	0	0	0	0	0	0	0	0	0		0	0	3	0	0	0
1506	AC204573.3_FG015	0	0	0	0	0	0	0		1	0	0	0	0	0	0	0	0	0	0	0	0	1	0	0		0	0	0	0	0	0	0	0	0	0	0	0	1	0	0	0		2	0	1	0	0	0
1507	AC204581.3_FG003	0	0	0	0	0	0	0		0	0	0	0	0	0	0	0	0	0	0	0	0	0	0	0		0	0	0	0	0	0	0	0	0	0	0	0	0	0	0	0		0	0	1	0	0	0
1508	AC204591.3_FG002	0	0	0	0	0	0	0		0	0	0	0	0	0	0	0	0	0	0	0	0	0	0	0		0	0	0	0	0	0	0	0	0	0	0	0	0	0	0	0		0	0	0	0	0	0
1509	AC204604.3_FG008	0	0	0	0	0	0	0		0	0	0	0	0	0	0	0	0	0	0	0	0	0	0	0		0	0	0	0	0	0	0	0	0	0	0	0	0	0	0	0		96	139	71	147	83	88
1510	AC204605.3_FG008	0	0	0	0	0	0	0		0	0	0	0	0	0	0	0	0	0	0	0	0	0	0	0		0	0	0	0	0	0	0	0	0	0	0	0	0	0	0	0		0	0	0	0	0	0
1511	AC204611.4_FG001	0	0	0	0	0	0	0		20	2	15	0	18	0	38	0	0	6	0	2	0	11	0	4		3	1	5	1	14	14	10	7	7	2	6	1	4	6	4	5		106	39	70	105	90	35
1512	AC204618.3_FG001	0	0	0	0	0	0	0		0	0	0	0	0	0	0	0	0	0	0	0	0	0	0	0		0	0	0	0	0	0	0	0	0	0	0	0	0	0	0	0		0	0	1	0	0	1
1513	AC204619.3_FG003	0	0	0	0	0	0	0		0	0	0	0	0	0	0	0	0	0	0	0	0	0	0	0		0	0	0	0	0	0	0	0	0	0	0	0	0	0	0	0		0	0	0	0	0	0
1514	AC204621.4_FG006	0	0	0	0	0	0	0		0	0	0	0	0	0	0	0	0	0	0	0	0	0	0	0		0	0	0	0	0	0	0	0	0	0	0	0	0	0	0	0		0	0	1	1	0	0
1515	AC204636.3_FG003	0	0	0	0	0	0	0		0	0	0	0	0	0	0	0	0	0	0	0	0	0	0	0		0	0	0	0	0	0	0	0	0	0	0	0	0	0	0	0		0	1	1	0	0	1
1516	AC204641.5_FG001	0	0	0	0	0	0	0		0	0	0	0	0	0	0	0	0	0	0	0	0	0	0	0		0	0	0	0	0	0	0	0	0	0	0	0	0	0	0	0		3	3	4	2	1	2
1517	AC204641.5_FG003	0	0	0	0	0	0	0		0	0	0	0	0	0	0	0	0	0	0	0	0	0	0	0		0	0	0	0	0	0	0	0	0	0	0	0	0	0	0	0		0	0	1	0	0	0
1518	AC204659.3_FG005	0	0	0	0	0	0	0		0	0	0	0	0	0	0	0	0	0	0	0	0	0	0	0		0	0	0	0	0	0	0	0	0	0	0	0	0	0	0	0		1	0	2	2	0	2
1519	AC204662.3_FG005	0	0	0	0	0	0	0		0	0	0	0	0	0	0	0	0	0	0	0	0	0	0	0		0	0	0	0	0	0	0	0	0	0	0	0	0	0	0	0		1	1	1	1	1	1
1520	AC204679.3_FG003	0	0	0	0	0	0	0		0	0	0	0	0	0	0	0	0	0	0	0	0	0	0	0		0	0	0	0	0	0	0	0	0	0	0	0	0	0	0	0		1	1	2	2	1	2
1521	AC204687.3_FG001	0	0	0	0	0	0	0		0	0	0	0	0	0	0	0	0	0	0	0	0	0	0	0		0	0	0	0	0	0	0	0	0	0	0	0	0	0	0	0		0	0	1	0	0	0
1522	AC204690.4_FG005	0	0	0	0	0	0	0		0	0	0	0	0	0	0	0	0	0	0	0	0	0	0	0		0	0	0	0	0	0	0	0	0	0	0	0	0	0	0	0		0	0	0	0	1	1
1523	AC204703.3_FG007	0	0	0	0	0	0	0		0	0	0	0	0	0	0	0	0	0	0	0	0	0	0	0		0	0	0	0	0	0	0	0	0	0	0	0	0	0	0	0		0	2	1	1	2	0
1524	AC204707.4_FG001	0	0	0	0	0	0	0		0	0	0	0	0	0	0	0	0	0	0	0	0	0	0	0		0	0	0	0	0	0	0	0	0	0	0	0	0	0	0	0		0	0	0	0	0	0
1525	AC204710.4_FG003	0	0	0	0	0	1	0		0	0	0	0	1	0	6	0	0	0	0	1	0	3	0	3		2	0	1	2	2	0	1	1	5	1	7	3	4	2	3	1		3	3	11	15	4	7
1526	AC204711.3_FG002	0	0	0	0	0	0	0		1	0	0	0	2	0	3	0	0	0	1	0	0	0	0	1		0	0	0	0	1	0	3	1	2	0	1	0	2	2	0	0		9	3	5	4	5	10
1527	AC204711.3_FG003	0	0	0	0	1	1	1		63	0	46	0	29	0	45	0	0	14	0	23	0	26	0	33		70	11	61	12	59	12	70	15	70	19	40	7	57	22	57	16		144	53	177	232	106	65
1528	AC204712.3_FG002	0	0	0	0	0	0	0		0	0	0	0	0	0	0	0	0	0	0	0	0	0	0	0		0	0	0	0	0	0	0	0	0	0	0	0	0	0	0	0		59	35	71	50	60	52
1529	AC204712.3_FG006	0	0	0	0	0	0	0		0	0	0	0	0	0	0	0	0	0	0	0	0	0	0	0		0	0	0	0	0	0	0	0	0	0	0	0	0	0	0	0		2	0	1	0	0	0
1530	AC204717.3_FG005	0	0	0	0	0	0	0		0	0	0	0	0	0	0	0	0	0	0	0	0	0	0	0		0	0	1	0	0	0	0	0	0	0	0	0	0	0	0	0		2	1	0	0	4	5
1531	AC204763.2_FG001	0	0	0	0	0	0	0		0	0	0	0	0	0	0	0	0	0	0	2	0	0	0	0		0	0	0	0	0	0	1	0	0	1	0	0	0	0	1	0		1	1	6	3	0	5
1532	AC204768.3_FG001	0	0	0	0	0	0	0		0	0	0	0	0	0	0	0	0	0	0	0	0	0	0	0		0	0	0	0	0	0	0	0	0	0	0	0	0	0	0	0		0	1	0	1	2	0
1533	AC204772.2_FG002	0	0	0	0	0	0	0		0	0	0	0	0	0	0	0	0	0	0	0	0	0	0	0		0	0	0	0	0	0	0	0	0	0	0	0	0	0	0	0		0	1	0	2	0	0
1534	AC204821.3_FG004	0	0	0	0	0	0	0		0	0	0	0	0	0	0	0	0	0	0	0	0	0	0	0		1	0	0	0	0	0	0	0	0	0	0	0	0	0	0	0		0	0	1	0	1	1
1535	AC204845.3_FG008	0	0	0	0	0	0	0		0	0	0	0	0	0	0	0	0	0	0	0	0	0	0	0		0	2	0	0	0	1	0	0	0	0	0	0	0	0	0	0		0	0	2	1	0	0
1536	AC204868.3_FG004	0	0	0	0	0	0	0		1	0	0	0	0	0	1	0	0	1	0	2	0	0	0	1		0	0	0	1	2	1	1	1	0	1	2	3	0	1	1	1		112	78	86	77	64	60
1537	AC204887.4_FG003	0	0	0	0	0	0	0		0	0	0	0	0	0	0	0	0	0	0	0	0	0	0	0		0	0	0	0	0	0	0	0	0	0	0	0	0	0	0	0		0	1	0	0	0	0
1538	AC204891.4_FG001	0	0	0	0	1	0	0		24	0	23	0	25	0	30	0	0	7	0	8	0	15	0	15		16	5	15	7	8	5	23	7	12	12	11	5	10	6	16	16		81	44	71	87	66	40
1539	AC204893.3_FG001	0	0	0	0	0	0	0		0	0	0	0	1	0	0	0	0	0	0	0	0	0	0	0		0	0	0	0	0	0	0	0	0	0	0	1	0	0	1	0		0	1	3	0	0	1
1540	AC204897.3_FG007	0	0	0	0	0	0	0		0	0	0	0	0	0	0	0	0	0	0	0	0	0	0	0		0	0	0	0	0	0	0	0	0	0	0	0	0	0	0	0		0	0	1	0	0	0
1541	AC204931.3_FG002	0	0	0	0	0	0	0		0	0	0	0	0	0	0	0	0	0	0	0	0	0	0	0		0	0	0	0	0	0	0	0	0	0	1	0	0	0	0	0		0	0	0	0	0	1
1542	AC204931.3_FG004	0	0	1	0	0	0	0		1	0	0	0	0	0	0	0	0	0	0	0	0	0	1	0		0	0	0	0	0	0	0	0	0	0	0	0	0	0	0	0		1	10	4	4	0	6
1543	AC204944.3_FG004	0	0	0	0	0	0	0		0	0	0	0	0	0	0	0	0	0	0	0	0	0	0	0		0	0	0	0	0	0	0	0	0	0	0	0	0	0	0	0		0	0	0	0	0	0
1544	AC204953.3_FG002	0	0	0	0	0	0	0		0	0	0	0	0	0	0	0	0	0	0	0	0	0	0	0		0	0	0	0	0	0	0	0	0	0	0	0	0	0	0	0		7	4	3	4	4	1
1545	AC205008.4_FG002	0	0	0	0	0	0	0		4	0	5	0	3	0	4	0	0	2	0	1	1	4	0	2		1	1	2	3	4	1	4	3	2	4	3	2	5	2	3	2		38	25	27	37	30	21
1546	AC205012.3_FG002	0	0	0	0	0	0	0		0	0	0	0	0	0	0	0	0	0	0	0	0	0	0	0		0	0	0	0	0	0	0	0	0	0	0	0	0	0	0	0		8	4	4	2	2	7
1547	AC205026.3_FG003	0	0	0	0	0	0	0		0	0	0	0	0	0	0	0	0	0	1	0	0	0	0	0		0	0	1	0	0	0	0	0	0	0	0	0	0	0	0	0		2	5	7	1	0	2
1548	AC205033.4_FG004	0	0	0	0	0	0	0		0	0	0	0	0	0	0	0	0	0	0	0	0	0	0	0		0	0	0	0	0	0	0	0	0	0	0	0	0	0	0	0		0	3	2	1	1	2
1549	AC205035.3_FG004	0	0	0	0	0	0	0		0	0	0	0	0	0	0	0	0	0	0	0	0	0	0	0		0	0	0	0	0	0	0	0	0	0	0	0	0	0	0	0		3	9	6	3	3	7
1550	AC205057.3_FG002	0	0	0	0	0	0	0		8	0	4	0	2	0	8	0	0	6	0	1	0	1	0	4		1	3	2	3	5	2	3	4	3	0	5	5	3	0	0	3		79	49	71	60	73	42
1551	AC205057.3_FG004	0	0	0	0	0	1	0		10	0	28	0	0	0	0	0	0	19	1	37	0	2	0	4		19	12	20	12	0	0	0	0	30	12	15	12	0	0	0	0		15	28	47	57	44	59
1552	AC205060.2_FG002	0	0	0	0	0	0	0		0	0	0	0	0	0	0	0	0	0	0	0	0	0	0	0		0	0	0	0	0	0	0	0	0	0	0	0	0	0	0	0		1	2	1	0	0	0
1553	AC205066.3_FG008	0	0	0	0	0	0	0		0	0	0	0	0	0	0	0	0	0	0	0	0	0	0	0		0	0	0	0	0	0	0	0	0	0	0	0	0	0	0	0		0	0	0	0	0	0
1554	AC205077.3_FG003	0	0	0	0	0	0	0		0	0	0	0	0	0	0	0	0	0	0	0	0	0	0	0		0	0	0	0	0	0	0	0	0	0	0	0	0	0	0	0		12	12	17	10	11	12
1555	AC205078.3_FG009	0	0	0	0	0	0	0		0	0	0	0	0	0	0	0	0	0	0	0	0	0	0	0		0	0	0	0	0	0	0	0	0	0	0	0	0	0	0	0		0	1	0	0	0	0
1556	AC205100.3_FG001	0	0	0	0	0	0	0		0	0	1	0	0	0	0	0	1	0	0	0	0	3	0	1		0	1	1	0	0	1	0	0	0	0	1	0	0	2	0	0		4	3	9	4	2	7
1557	AC205104.3_FG003	0	0	0	0	0	0	0		0	0	0	0	0	0	0	0	0	0	0	0	0	0	0	0		0	0	0	0	0	0	0	0	0	0	0	0	0	0	0	0		0	2	1	1	1	0
1558	AC205106.3_FG004	0	0	0	0	0	0	0		0	0	0	0	0	0	0	0	0	0	0	0	0	0	0	0		0	0	0	0	0	0	0	0	0	0	0	0	0	0	0	0		0	0	0	0	0	1
1559	AC205110.4_FG001	0	0	0	0	0	0	0		0	0	0	0	0	0	0	0	0	0	0	0	0	0	0	0		0	0	0	0	0	0	0	0	0	0	0	0	0	0	0	0		0	0	0	0	0	0
1560	AC205122.4_FG003	0	0	0	0	1	0	0		23	0	23	0	31	0	39	0	0	23	0	15	0	32	0	19		18	6	13	13	18	14	20	8	15	11	10	9	18	11	17	21		1022	774	1098	777	732	615
1561	AC205122.4_FG005	0	0	0	0	0	0	0		2	0	1	0	1	0	1	0	0	0	0	0	0	0	0	0		1	0	1	0	1	0	0	0	1	0	0	0	1	0	1	0		3	1	3	2	4	3
1562	AC205122.4_FG006	0	0	0	0	0	0	0		0	0	0	0	1	0	0	0	0	0	0	0	0	0	0	0		0	0	0	0	0	0	0	0	0	0	0	0	0	0	0	0		0	0	1	0	0	0
1563	AC205122.4_FG007	0	0	0	0	0	0	0		1	0	0	0	0	0	0	0	0	0	0	0	0	0	0	1		1	0	0	0	0	0	0	0	2	0	1	0	1	0	1	0		9	3	3	8	3	2
1564	AC205122.4_FG008	0	0	0	0	0	0	0		0	0	0	0	0	0	0	0	0	0	0	0	0	0	0	0		0	0	0	0	0	0	0	0	0	0	0	0	0	0	0	0		6	3	4	4	4	3
1565	AC205122.4_FG009	0	0	0	0	0	0	0		3	0	0	0	1	0	2	0	0	3	0	2	0	0	0	1		2	1	2	1	0	2	2	0	0	3	1	0	2	0	2	1		14	13	17	13	6	14
1566	AC205122.4_FG010	0	0	0	0	1	1	1		7	0	8	0	3	0	5	0	0	0	1	2	0	0	0	1		1	1	4	0	2	0	1	0	5	0	5	0	0	1	2	0		37	8	10	20	35	8
1567	AC205154.3_FG001	0	0	0	0	0	0	0		0	0	0	0	0	0	0	0	0	0	0	0	0	0	0	0		0	0	0	0	0	0	0	0	0	0	0	0	0	0	0	0		0	0	0	0	1	0
1568	AC205154.3_FG005	0	0	0	0	0	0	0		0	0	0	0	0	0	0	0	0	0	0	0	0	0	0	0		0	0	0	0	0	0	0	0	0	0	0	0	0	0	0	0		289	91	267	267	227	74
1569	AC205155.3_FG001	0	0	0	0	0	0	0		0	0	1	0	0	0	0	0	0	0	0	0	0	0	0	0		0	0	0	0	0	0	1	0	0	0	0	0	0	0	0	0		1	3	0	2	3	0
1570	AC205158.3_FG004	0	0	0	0	0	0	0		0	0	0	0	0	0	0	0	0	0	0	0	0	0	0	0		0	0	0	0	0	0	0	0	0	0	0	0	0	0	0	0		2	1	2	2	0	1
1571	AC205165.3_FG002	0	0	0	0	0	0	0		0	0	0	0	0	0	0	0	0	0	0	0	0	0	0	0		0	0	0	0	0	0	0	0	0	0	0	0	0	0	0	0		0	0	1	0	0	0
1572	AC205171.3_FG001	0	0	0	0	0	0	0		0	0	0	0	0	0	0	0	0	0	0	0	0	0	0	0		0	0	0	0	0	0	0	0	0	0	0	0	0	0	0	0		0	0	0	0	0	0
1573	AC205173.3_FG001	0	0	0	0	0	0	0		0	0	0	0	0	0	0	0	0	0	0	0	0	0	0	0		0	0	0	0	0	0	0	0	0	0	0	0	0	0	0	0		0	0	0	0	0	0
1574	AC205175.3_FG001	0	0	0	0	0	0	0		0	0	0	0	0	0	0	0	0	0	0	0	0	0	0	0		0	0	0	0	0	0	0	0	0	0	0	0	0	0	0	0		0	0	0	2	0	0
1575	AC205175.3_FG002	0	0	0	0	0	0	0		0	0	0	0	0	0	0	0	0	0	0	0	0	0	0	0		0	0	0	0	0	0	0	0	0	0	0	0	0	0	0	0		1	3	0	0	0	0
1576	AC205250.3_FG004	0	0	0	0	0	0	0		0	0	0	0	0	0	0	0	0	0	0	0	0	0	0	0		0	0	0	0	0	0	0	0	0	0	0	0	0	0	0	0		3	2	1	2	4	2
1577	AC205250.3_FG006	0	0	0	0	1	1	1		9	0	9	0	16	0	16	0	0	6	0	1	0	4	0	9		10	2	2	0	7	1	8	7	5	5	7	2	11	3	7	3		60	14	42	63	52	7
1578	AC205251.3_FG002	0	0	0	0	0	0	0		0	0	0	0	0	0	0	0	0	0	0	0	0	0	0	0		0	0	0	0	0	0	0	0	0	0	0	0	0	0	0	0		0	0	0	0	1	0
1579	AC205269.3_FG003	0	0	0	0	0	0	0		0	0	0	0	0	0	0	0	0	0	0	0	0	0	0	0		0	0	0	0	0	0	0	0	1	0	0	0	0	0	0	0		0	1	0	2	2	1
1580	AC205274.3_FG001	0	0	0	0	0	0	0		2	0	0	0	2	0	1	0	0	16	0	7	0	38	0	37		0	1	2	0	0	0	0	0	0	0	0	0	0	0	0	0		2	17	3	1	0	13
1581	AC205320.3_FG004	0	0	0	0	1	0	0		32	0	23	0	20	0	18	0	1	16	0	15	0	19	1	29		16	7	14	4	12	8	12	9	8	3	10	9	8	10	10	8		103	69	91	68	105	79
1582	AC205324.3_FG003	0	0	0	0	0	0	0		0	0	0	0	0	0	0	0	0	0	0	0	0	0	0	0		0	0	0	0	1	0	0	0	1	0	0	0	0	0	0	0		1	1	0	2	1	0
1583	AC205326.3_FG002	0	0	0	0	0	0	0		0	0	0	0	0	0	0	0	0	0	0	0	0	0	0	0		0	0	0	0	0	0	0	0	0	0	0	0	0	0	0	0		43	57	42	85	63	57
1584	AC205331.3_FG004	0	0	0	0	0	0	0		0	0	0	0	0	0	0	0	0	0	0	0	0	0	0	0		0	0	0	0	0	0	0	0	0	0	0	0	0	0	0	0		2	10	8	8	1	7
1585	AC205336.3_FG003	0	0	0	0	0	0	0		0	0	0	0	0	0	0	0	0	0	0	0	0	0	0	0		0	0	0	0	0	0	0	0	0	0	0	0	0	0	0	0		1	1	1	2	1	1
1586	AC205345.3_FG002	0	0	0	0	0	0	0		0	0	0	0	0	0	0	0	0	0	0	0	0	0	0	0		0	0	0	0	0	0	0	0	0	0	0	0	0	0	0	0		1	0	1	4	0	2
1587	AC205362.4_FG002	0	0	0	0	0	1	0		29	0	26	1	29	1	35	0	1	5	0	13	0	7	0	5		8	14	7	0	15	10	8	7	7	5	10	5	8	4	15	7		244	89	135	135	214	83
1588	AC205369.3_FG001	0	0	0	0	0	0	0		0	0	0	0	0	0	0	0	0	0	0	0	0	0	0	0		0	0	0	0	0	0	0	0	0	0	0	0	0	0	0	0		1	0	0	1	0	0
1589	AC205376.4_FG003	0	0	0	0	0	0	0		0	0	0	0	0	0	1	0	0	0	0	0	0	0	0	0		0	0	0	0	0	0	0	0	0	0	1	0	0	0	0	0		2	1	2	0	0	1
1590	AC205376.4_FG008	0	0	0	0	0	1	0		6	0	6	0	2	0	0	0	0	7	0	11	0	2	0	2		5	3	7	4	0	0	0	1	2	8	4	12	1	2	0	0		38	93	71	73	49	94
1591	AC205379.3_FG012	0	0	0	0	0	0	0		0	0	0	0	0	0	0	0	0	0	0	0	0	0	0	0		0	0	0	0	0	0	0	0	0	0	0	0	0	0	0	0		0	0	0	1	0	1
1592	AC205395.3_FG003	0	0	0	0	0	0	0		0	0	0	0	0	0	0	0	0	0	0	0	1	0	0	0		0	0	0	0	1	0	0	0	0	0	1	0	0	0	0	0		1	0	0	2	0	1
1593	AC205405.3_FG001	0	0	0	0	0	0	0		0	0	0	0	0	0	0	0	0	0	0	0	0	0	0	0		0	0	0	0	0	0	0	0	0	0	0	0	0	0	0	0		0	0	2	0	0	0
1594	AC205411.3_FG001	0	0	0	0	0	0	0		0	0	0	0	0	0	0	0	0	0	0	0	0	0	0	0		0	0	0	0	0	0	0	0	0	0	0	0	0	0	0	0		0	0	0	0	0	0
1595	AC205413.4_FG001	0	0	0	0	1	1	1		12	0	5	0	16	0	20	0	0	0	0	1	0	6	0	20		4	0	1	0	12	5	14	4	5	1	2	0	8	1	9	4		94	49	68	130	65	51
1596	AC205413.4_FG002	0	0	0	0	0	0	0		0	0	0	0	0	0	0	0	0	0	0	0	0	0	0	0		0	0	0	0	0	0	0	0	0	0	0	0	0	0	0	0		1	0	0	0	0	0
1597	AC205413.4_FG003	0	0	0	0	0	0	0		0	0	0	0	0	0	0	0	0	0	0	0	0	0	0	0		0	0	0	0	0	0	0	0	0	0	0	0	0	0	0	0		0	0	0	0	0	0
1598	AC205417.3_FG003	0	0	0	0	0	0	0		0	0	0	0	0	0	0	0	0	0	0	0	0	0	0	0		0	0	0	0	0	0	0	0	0	0	0	0	0	0	0	0		0	1	1	0	0	0
1599	AC205419.3_FG001	0	0	0	0	1	1	1		387	2	430	3	67	0	56	0	3	298	2	308	0	51	0	24		277	142	382	196	43	13	32	10	367	191	274	168	44	19	33	18		1849	1605	1957	2228	1864	1551
1600	AC205425.3_FG006	0	0	0	0	0	0	0		0	0	0	0	0	0	0	0	0	0	0	0	0	0	0	0		0	0	0	0	0	0	0	0	0	0	0	0	0	0	0	0		0	2	1	1	0	0
1601	AC205466.3_FG003	0	0	0	0	0	0	0		0	0	0	0	0	0	0	0	0	0	0	0	0	0	0	0		0	0	0	0	0	0	0	0	0	0	0	0	0	0	0	0		0	1	1	0	1	0
1602	AC205470.3_FG008	0	0	0	0	0	0	0		0	0	0	0	0	0	0	0	0	0	0	0	0	0	0	0		1	0	0	0	0	0	0	0	0	0	0	0	0	0	1	0		0	0	1	0	0	1
1603	AC205471.4_FG003	0	0	0	0	0	1	0		14	0	11	0	13	0	14	0	0	13	1	7	0	21	0	30		1	7	5	2	4	5	8	2	2	5	0	3	0	4	5	6		36	48	19	28	23	24
1604	AC205471.4_FG007	0	0	0	0	0	0	0		15	2	11	0	15	0	17	0	0	4	0	6	0	12	0	10		3	2	1	0	9	7	6	8	1	0	1	0	4	3	11	5		231	181	181	149	184	204
1605	AC205471.4_FG008	0	0	0	0	0	0	0		1	0	0	0	0	0	0	0	0	0	0	1	0	4	0	0		0	2	0	0	0	0	0	0	0	1	0	0	0	0	0	0		2	2	8	3	1	4
1606	AC205476.3_FG007	0	0	0	0	0	0	0		0	0	0	0	0	0	0	0	0	0	0	0	0	0	0	0		0	0	0	0	0	0	0	0	0	0	0	0	0	0	0	0		1	0	0	0	0	1
1607	AC205484.3_FG005	0	0	0	0	0	0	0		1	0	0	0	0	0	0	0	0	0	0	2	0	0	1	0		0	0	0	0	0	0	0	0	0	0	0	0	0	0	0	0		7	16	11	6	3	26
1608	AC205485.3_FG011	0	0	0	0	0	0	0		0	0	0	0	0	0	0	0	0	0	0	1	0	0	0	0		0	0	0	0	0	0	0	0	0	0	0	0	0	0	0	0		1	0	1	0	0	3
1609	AC205490.4_FG004	0	0	0	0	0	0	0		0	0	1	0	0	0	0	0	0	0	0	0	0	0	0	1		1	0	0	0	0	0	0	0	2	0	0	0	1	0	1	0		0	2	4	3	3	1
1610	AC205496.3_FG002	0	0	0	0	0	0	0		0	0	0	0	0	0	0	0	0	1	0	0	0	0	0	0		0	2	0	0	0	0	0	1	0	1	0	0	0	0	0	1		1	2	2	1	0	3
1611	AC205500.3_FG002	0	0	0	0	0	0	0		0	0	0	0	0	0	0	0	0	0	0	0	0	0	0	0		0	0	0	0	0	0	0	0	0	0	0	0	0	0	0	0		43	38	31	34	40	39
1612	AC205502.4_FG004	0	0	0	0	1	1	1		6	0	4	0	28	0	18	0	0	2	0	3	0	6	0	11		5	1	4	0	3	4	3	0	16	4	4	1	8	3	10	3		40	14	23	67	28	12
1613	AC205511.3_FG002	0	0	1	0	1	1	1		0	0	0	0	0	0	1	0	1	5	0	3	0	4	0	9		0	1	1	1	0	5	0	4	0	3	0	2	0	3	0	2		0	20	10	8	2	14
1614	AC205513.3_FG003	0	0	0	0	0	0	0		0	0	0	0	0	0	0	0	0	0	0	0	0	0	0	0		0	0	0	0	0	0	0	0	0	0	0	0	0	0	0	0		1	3	2	2	1	3
1615	AC205521.3_FG003	0	0	0	0	1	1	1		222	1	183	1	179	0	214	0	1	185	0	145	0	153	0	158		140	112	135	98	148	119	115	98	129	101	125	98	152	107	125	113		1755	1609	1696	1737	1442	1292
1616	AC205532.3_FG001	0	0	0	0	0	0	0		0	0	0	0	0	0	0	0	0	0	0	0	0	0	0	0		0	0	0	0	0	0	0	0	0	0	0	0	0	0	0	0		0	0	0	1	0	0
1617	AC205534.3_FG001	0	0	0	0	0	0	0		0	0	0	0	0	0	0	0	0	0	1	0	0	0	0	0		0	0	0	0	0	0	0	0	0	0	0	0	0	0	0	0		0	0	0	0	0	1
1618	AC205534.3_FG002	0	1	0	0	0	0	0		0	0	0	0	0	0	0	0	0	0	0	0	0	0	0	0		0	0	0	0	0	0	0	0	0	0	0	0	0	0	0	0		3	0	1	2	2	0
1619	AC205544.3_FG004	0	0	0	0	0	0	0		0	0	0	0	0	0	0	0	0	0	0	0	0	0	0	0		0	0	0	0	0	0	0	0	0	0	0	0	0	0	0	0		13	21	20	22	13	19
1620	AC205558.3_FG002	0	1	0	0	0	0	0		0	0	0	0	0	0	0	0	0	0	0	0	0	0	0	0		0	0	0	0	0	0	0	0	0	0	0	0	0	0	0	0		22	0	8	13	18	0
1621	AC205560.3_FG003	0	0	0	0	0	0	0		0	0	0	0	0	0	0	0	0	0	0	0	0	0	1	0		0	0	0	0	0	0	0	0	0	0	0	0	0	0	0	1		2	2	2	0	1	1
1622	AC205562.3_FG002	0	0	0	0	0	0	0		2	0	2	0	3	0	2	0	1	4	0	3	0	8	0	10		1	1	0	1	2	4	5	3	4	0	2	2	0	2	1	1		11	34	10	18	7	18
1623	AC205567.3_FG002	0	0	1	0	0	0	0		0	0	0	0	0	0	0	0	0	0	0	1	0	1	0	1		0	0	0	1	0	0	0	0	0	0	0	0	0	0	0	2		0	15	3	20	0	10
1624	AC205574.3_FG006	0	0	0	0	0	0	0		3	1	2	1	2	0	2	0	0	1	0	1	1	4	0	1		0	1	1	1	0	0	0	1	0	0	1	1	1	1	0	2		17	18	18	8	7	8
1625	AC205591.4_FG006	0	0	0	0	0	0	0		0	0	0	0	0	0	0	0	0	0	0	0	0	0	0	0		0	0	0	0	0	0	0	0	0	0	0	0	0	0	0	0		0	0	0	0	0	0
1626	AC205592.3_FG001	0	0	0	0	0	0	0		0	0	1	0	1	0	1	0	1	0	0	0	0	0	0	1		1	0	0	0	0	0	1	0	0	0	1	1	1	0	0	1		1	1	5	0	2	3
1627	AC205595.3_FG007	0	0	0	0	0	0	0		0	0	0	0	0	0	0	0	0	0	0	0	0	0	0	0		0	0	0	0	0	0	0	0	0	0	0	0	0	0	0	0		0	0	1	0	0	0
1628	AC205605.3_FG002	0	0	0	0	0	0	0		0	0	0	0	0	0	0	0	0	0	0	0	0	0	0	0		0	0	0	0	0	0	0	0	0	0	0	0	0	0	0	0		0	0	0	0	0	0
1629	AC205608.4_FG004	0	0	0	0	0	0	0		0	0	0	0	0	0	0	0	0	0	0	0	0	0	0	0		0	0	0	0	0	0	0	0	0	0	0	0	0	0	0	0		416	401	355	646	379	390
1630	AC205615.4_FG002	0	0	0	0	0	0	0		1	0	0	0	0	0	0	0	0	0	1	0	0	0	0	0		2	0	0	0	0	0	0	0	0	0	0	0	0	0	0	0		2	3	3	0	0	6
1631	AC205619.3_FG003	0	0	0	0	0	0	0		0	0	0	0	0	0	0	0	0	0	0	0	0	0	0	0		0	0	0	0	0	0	0	0	0	0	0	0	0	0	0	0		1	1	1	1	0	1
1632	AC205664.3_FG001	0	0	0	0	0	0	0		1	0	2	0	0	0	0	0	0	0	0	0	1	0	0	0		0	0	0	0	0	0	0	0	1	0	0	0	0	0	0	0		12	1	6	8	13	1
1633	AC205672.3_FG001	0	0	0	0	0	0	0		0	0	0	0	0	0	0	0	0	0	0	0	0	0	0	0		0	0	0	0	0	0	0	0	0	0	0	0	0	0	0	0		0	1	1	0	0	0
1634	AC205673.3_FG006	0	0	0	0	1	1	1		8	0	14	0	9	0	12	0	0	9	0	14	0	7	0	6		6	4	13	10	9	6	9	0	8	7	11	3	11	1	6	5		17	18	19	25	23	17
1635	AC205677.3_FG001	0	0	0	0	0	0	0		0	0	0	0	0	0	0	0	0	0	0	0	0	0	0	0		0	0	0	0	0	0	0	0	0	0	0	0	0	0	0	0		728	844	734	1104	794	853
1636	AC205695.3_FG008	0	0	0	0	0	0	0		0	0	0	0	0	0	0	0	0	0	0	0	0	0	0	0		0	0	0	0	0	0	0	0	0	0	0	0	0	0	0	0		0	0	0	0	0	0
1637	AC205703.4_FG001	0	0	0	0	0	0	0		0	0	0	0	0	0	0	0	0	0	0	0	0	0	0	0		0	0	0	0	0	0	0	0	0	0	0	0	0	0	0	0		41	24	33	40	26	29
1638	AC205703.4_FG002	0	0	0	0	0	1	0		83	0	71	0	78	0	85	0	0	51	1	45	1	53	1	49		39	40	33	31	58	29	43	41	46	32	34	20	52	34	47	45		692	669	654	714	611	581
1639	AC205703.4_FG005	0	0	0	0	0	0	0		0	0	0	0	0	0	0	0	0	0	0	0	0	0	0	0		0	0	0	0	0	0	0	0	0	0	0	0	0	0	0	0		244	297	208	336	248	266
1640	AC205703.4_FG006	0	0	0	0	0	0	0		0	0	0	0	0	0	0	0	0	0	0	0	0	0	0	0		0	0	0	0	0	0	0	0	0	0	0	0	0	0	0	0		512	434	407	496	390	410
1641	AC205703.4_FG010	0	0	0	0	0	0	0		0	0	0	0	0	0	0	0	0	0	0	0	0	0	0	0		0	0	0	0	0	0	0	0	0	0	0	0	0	0	0	0		633	985	832	1121	746	1027
1642	AC205709.3_FG001	0	0	0	0	0	0	0		0	0	0	0	0	0	0	0	0	0	0	2	0	1	0	0		0	3	0	0	0	2	0	1	0	2	0	2	0	0	0	1		0	2	4	3	1	4
1643	AC205712.3_FG003	0	0	0	0	0	0	0		0	0	1	0	2	0	0	0	0	0	0	0	0	0	0	0		0	0	0	0	0	0	0	0	0	0	0	0	1	0	0	2		1	0	0	2	3	1
1644	AC205713.4_FG004	0	0	0	0	0	0	0		0	0	0	0	0	0	0	0	0	0	0	0	0	0	0	0		0	0	0	0	0	0	0	0	0	0	0	0	0	0	0	0		0	0	0	0	0	0
1645	AC205722.3_FG004	0	0	0	0	0	0	0		0	0	0	0	0	0	0	0	0	0	0	0	0	0	0	0		0	0	0	0	0	0	0	0	0	0	0	0	0	0	0	0		7	15	7	3	9	9
1646	AC205725.3_FG010	0	1	0	0	1	1	1		12	0	12	0	6	0	6	0	0	0	1	0	0	0	0	0		6	0	10	0	4	0	5	0	7	0	7	0	5	0	3	0		125	0	69	97	164	2
1647	AC205726.4_FG003	0	0	0	0	0	0	0		0	0	0	0	0	0	0	0	0	0	0	0	0	0	0	0		0	0	0	0	0	0	0	0	0	0	0	0	0	0	0	0		1	0	0	1	0	0
1648	AC205730.3_FG001	0	0	0	0	0	0	0		0	0	0	0	0	0	0	0	0	0	0	0	0	0	0	0		0	0	0	0	0	0	0	0	0	0	0	0	0	0	0	0		3	6	3	2	1	2
1649	AC205730.3_FG002	0	0	0	0	0	0	0		0	0	0	0	0	0	0	0	0	2	0	0	0	0	0	1		0	1	0	0	0	0	0	0	1	0	0	0	0	0	0	0		170	213	181	252	198	198
1650	AC205735.3_FG006	0	0	0	0	0	0	0		0	0	0	0	0	0	0	0	0	0	0	0	0	0	0	0		0	0	0	0	0	0	0	0	0	0	0	0	0	0	0	0		32	41	21	38	42	39
1651	AC205813.4_FG008	0	0	1	0	0	0	0		0	0	0	0	0	0	0	0	0	0	0	0	0	0	0	0		0	0	0	0	0	0	0	0	0	0	0	0	0	0	0	0		0	2	0	1	0	3
1652	AC205814.3_FG001	0	0	0	0	0	0	0		0	0	0	0	0	0	0	0	0	0	0	0	0	0	0	0		0	0	0	0	0	0	0	0	0	0	0	0	0	0	0	0		0	0	0	0	0	0
1653	AC205833.3_FG002	0	0	0	0	0	0	0		0	0	0	0	0	0	0	0	0	0	0	0	0	0	0	0		0	0	0	0	0	0	0	0	0	0	0	0	0	0	0	0		0	0	0	0	0	0
1654	AC205834.3_FG003	0	0	0	0	0	0	0		0	0	0	0	0	0	0	0	0	0	0	0	0	0	0	0		0	0	0	0	0	0	0	0	0	0	0	0	0	0	0	0		1	0	1	1	1	0
1655	AC205853.3_FG014	0	0	0	0	0	0	0		2	0	4	0	0	0	1	0	0	0	1	0	0	0	0	0		2	0	3	0	0	0	0	0	1	0	1	0	0	0	0	0		10	2	8	6	11	3
1656	AC205886.3_FG001	0	0	0	0	0	0	0		0	0	1	0	0	0	0	0	0	0	0	0	0	0	0	0		0	0	1	0	1	0	0	0	0	0	0	0	0	0	0	0		43	4	3	6	62	1
1657	AC205888.4_FG004	0	0	0	0	0	0	0		0	0	0	0	0	0	0	0	0	0	0	0	0	0	0	0		0	0	1	0	0	0	0	0	0	0	0	0	0	0	0	0		0	0	1	1	1	4
1658	AC205907.3_FG004	0	0	0	0	0	0	0		0	0	0	0	0	0	0	0	0	0	0	0	0	0	0	0		0	0	0	0	0	0	0	0	0	0	0	0	0	0	0	0		0	1	1	0	0	0
1659	AC205968.3_FG001	0	0	0	0	0	0	0		0	0	0	0	0	0	0	0	0	0	0	0	0	0	0	0		0	0	0	0	0	0	0	0	0	0	0	0	0	0	0	0		0	2	1	0	1	1
1660	AC205972.3_FG002	0	0	0	0	0	0	0		0	0	0	0	0	0	0	0	0	0	0	0	0	0	0	0		0	0	0	0	0	0	0	0	0	0	0	0	0	0	0	0		0	0	0	0	0	0
1661	AC205976.3_FG004	0	0	0	0	0	0	0		0	0	0	0	0	0	0	0	0	0	0	0	0	0	0	0		0	0	0	0	0	0	0	0	0	0	0	0	0	0	0	0		0	0	0	0	0	0
1662	AC205982.3_FG014	0	0	0	0	0	1	0		4	0	3	0	1	0	0	0	0	2	1	3	0	4	0	4		0	0	2	0	1	0	1	2	5	2	5	0	2	1	1	1		134	201	190	169	125	209
1663	AC206030.4_FG001	0	0	0	0	0	0	0		0	0	0	0	0	0	0	0	0	0	0	0	0	0	0	0		0	0	0	0	0	0	0	0	0	0	0	0	0	0	0	0		15	5	6	17	10	3
1664	AC206031.3_FG007	0	0	0	0	0	0	0		0	0	0	0	0	0	0	0	0	4	0	1	0	1	0	4		0	0	0	1	0	2	2	2	0	1	0	1	0	2	0	1		4	22	20	11	3	20
1665	AC206156.3_FG003	0	0	0	0	0	0	0		0	0	0	0	0	0	0	0	0	0	0	0	0	0	0	0		0	0	0	0	0	0	0	0	0	0	0	0	0	0	0	0		0	0	0	0	0	0
1666	AC206156.3_FG009	0	0	0	0	0	0	0		0	0	0	0	0	0	0	0	0	0	0	0	0	0	0	0		0	0	0	0	0	0	0	0	0	0	0	0	0	0	0	0		3	1	3	4	3	1
1667	AC206160.3_FG001	0	0	0	0	0	0	0		0	0	0	0	0	0	0	0	0	0	0	0	0	0	0	0		0	0	0	0	0	0	0	0	0	0	0	0	0	0	0	0		0	1	0	0	0	0
1668	AC206165.3_FG007	0	0	0	0	0	0	0		2	0	0	0	6	0	8	0	1	5	0	3	0	19	0	13		0	0	2	1	5	5	3	4	2	1	0	0	1	0	3	0		3	19	5	8	6	12
1669	AC206165.3_FG009	0	0	0	0	0	0	0		4	0	5	0	10	0	7	0	0	0	0	1	0	6	0	4		2	0	0	0	2	2	3	1	0	1	0	0	0	3	3	3		30	3	12	8	22	9
1670	AC206165.3_FG019	0	0	0	0	0	0	0		0	0	0	0	0	0	0	0	0	0	0	0	1	0	0	0		0	0	1	0	0	0	0	0	0	0	0	0	0	0	0	0		11	5	1	9	8	6
1671	AC206166.3_FG002	0	0	0	0	0	0	0		0	0	0	0	0	0	0	0	0	0	0	0	0	0	0	0		0	0	0	0	0	0	0	0	0	0	0	0	0	0	0	0		0	2	0	0	0	1
1672	AC206168.2_FG003	0	0	0	0	0	0	0		0	0	0	0	0	0	0	0	0	0	0	0	0	0	0	0		0	0	0	0	0	0	0	0	0	0	0	0	0	0	0	0		0	0	1	0	1	1
1673	AC206169.3_FG002	0	0	0	0	0	0	0		0	0	0	0	0	0	0	0	0	0	0	0	0	0	0	0		0	0	0	0	0	0	0	0	0	0	0	0	0	0	0	0		0	3	2	1	4	0
1674	AC206184.4_FG002	0	0	0	0	0	0	0		0	0	0	0	0	0	0	0	0	0	0	0	0	0	0	0		0	0	0	0	0	0	0	0	0	0	0	0	0	0	0	0		0	0	0	0	1	3
1675	AC206185.3_FG002	0	0	0	0	0	0	0		0	0	0	0	0	0	0	0	0	0	0	0	0	0	0	0		0	0	0	0	0	0	0	0	0	0	0	0	0	0	0	0		0	0	0	0	0	0
1676	AC206186.3_FG001	0	0	0	0	0	0	0		0	0	0	0	0	0	0	0	0	0	0	0	0	0	0	0		0	0	0	0	0	0	0	0	0	0	0	0	0	0	0	0		1	1	0	0	0	0
1677	AC206194.3_FG003	0	0	0	0	0	0	0		0	0	0	0	0	0	0	0	0	0	0	0	0	0	0	0		0	0	0	0	0	0	0	0	0	0	0	0	0	0	0	0		0	0	0	0	0	1
1678	AC206198.3_FG001	0	0	0	0	0	0	0		0	0	0	0	0	0	0	0	0	0	0	0	0	0	0	0		0	0	0	0	0	0	0	0	0	0	0	0	0	0	0	0		2	4	7	3	5	2
1679	AC206199.3_FG001	0	0	0	0	0	0	0		0	0	0	0	0	0	0	0	0	0	0	0	0	0	0	0		0	0	0	0	0	0	0	0	0	0	0	0	0	0	0	0		0	0	0	0	0	0
1680	AC206199.3_FG005	0	0	0	0	0	0	0		0	0	0	0	0	0	0	0	0	0	0	0	0	0	0	0		0	0	0	0	0	0	0	0	0	0	0	0	0	0	0	0		1	0	0	1	0	0
1681	AC206201.3_FG004	0	0	0	0	0	0	0		1	0	0	0	0	0	0	0	0	1	0	0	0	0	0	0		0	0	0	1	0	0	0	0	0	0	0	1	1	0	0	0		27	14	17	26	27	18
1682	AC206201.3_FG009	0	0	0	0	0	0	0		0	0	0	0	0	0	0	0	0	0	0	0	0	1	0	0		0	0	0	0	0	0	0	0	0	0	0	0	0	0	0	0		1	1	1	1	0	1
1683	AC206217.2_FG006	0	0	0	0	0	0	0		0	0	0	0	0	0	0	0	0	1	0	0	0	4	0	2		0	0	1	0	0	2	0	0	0	0	0	0	0	0	0	0		1	2	0	0	0	1
1684	AC206223.3_FG001	0	0	0	0	1	1	1		20	0	19	0	32	0	20	1	0	21	0	21	1	22	1	20		11	3	12	9	11	12	19	11	6	7	18	3	10	10	12	9		109	96	93	92	83	91
1685	AC206223.3_FG004	0	0	0	0	0	0	0		0	0	0	0	0	0	0	0	0	0	0	0	0	0	0	0		0	0	0	0	0	0	0	0	0	0	0	0	0	0	0	0		1	6	1	0	0	3
1686	AC206223.3_FG006	0	0	0	0	0	0	0		62	2	44	0	57	0	63	0	1	78	1	63	0	73	1	88		25	30	36	25	42	36	33	34	32	40	29	24	42	50	32	47		223	322	212	317	206	236
1687	AC206223.3_FG007	0	0	0	0	0	0	0		0	0	0	0	0	0	0	0	0	0	0	1	0	0	0	0		3	0	0	1	1	0	1	0	0	0	0	0	0	0	1	1		8	3	13	3	11	9
1688	AC206223.3_FG008	0	0	0	0	0	0	0		0	0	0	0	0	0	0	0	0	0	0	0	0	0	0	0		0	0	0	0	0	0	0	0	0	0	0	0	0	0	0	0		47	34	46	48	47	27
1689	AC206223.3_FG010	0	0	0	0	0	0	0		0	0	0	0	0	0	0	0	0	0	0	0	0	0	0	0		0	0	0	0	0	0	0	0	0	0	0	0	0	0	0	0		179	122	155	184	151	115
1690	AC206227.4_FG001	0	0	0	0	0	0	0		0	0	0	0	0	0	0	0	0	0	0	0	0	0	0	0		0	0	0	0	0	0	0	0	0	0	0	0	0	0	0	0		0	2	1	0	1	0
1691	AC206259.3_FG002	0	0	0	0	0	0	0		0	0	0	0	0	0	0	0	0	3	0	2	0	0	0	0		1	2	1	0	0	0	0	0	1	2	1	1	0	0	0	0		6	15	13	10	7	7
1692	AC206259.3_FG003	0	0	0	0	0	0	0		2	0	5	0	1	0	2	0	0	7	0	5	0	2	0	1		3	6	4	2	2	0	0	0	9	9	8	2	3	1	3	2		746	879	821	1160	777	891
1693	AC206262.3_FG004	0	0	0	0	0	0	0		0	0	0	0	0	0	0	0	0	0	0	0	0	0	0	0		0	0	0	0	0	0	0	0	0	0	0	0	0	0	0	0		1	0	0	0	0	0
1694	AC206265.3_FG006	0	0	0	0	0	0	0		1	0	0	0	0	0	0	0	0	0	0	0	0	0	0	0		0	0	1	0	0	0	0	0	0	0	0	0	0	0	0	0		1	3	0	1	0	1
1695	AC206266.3_FG001	0	0	1	0	0	0	0		0	0	0	0	0	0	0	0	0	0	0	0	0	0	0	0		0	0	0	0	0	0	0	0	0	0	0	0	1	0	0	0		2	10	5	9	1	14
1696	AC206273.3_FG004	0	0	0	0	0	0	0		0	0	0	0	0	0	0	0	0	0	0	0	0	0	0	0		0	0	0	0	0	0	0	0	0	0	0	0	0	0	0	0		0	0	1	1	0	0
1697	AC206274.3_FG008	0	0	0	0	1	0	0		1	0	0	0	0	0	0	0	1	3	0	2	0	3	0	3		0	2	0	3	0	3	0	2	1	2	0	0	0	3	0	2		3	110	62	38	2	75
1698	AC206285.3_FG003	0	0	0	0	0	0	0		0	0	0	0	0	0	0	0	0	0	0	0	0	0	0	0		0	0	0	0	0	0	0	0	0	0	0	0	0	0	0	0		0	0	1	0	1	0
1699	AC206285.3_FG005	0	0	1	0	1	1	1		0	0	2	0	0	0	0	0	0	4	0	8	0	1	0	2		0	3	0	4	0	1	0	2	0	4	0	6	0	3	0	2		1	12	14	15	2	18
1700	AC206312.3_FG008	0	0	0	0	0	0	0		0	0	0	0	0	0	0	0	0	0	0	0	0	0	0	0		0	0	0	0	0	0	0	0	0	0	0	0	0	0	0	0		0	0	2	1	2	1
1701	AC206319.2_FG004	0	0	0	0	0	0	0		0	0	0	0	0	0	0	0	0	0	0	0	0	0	0	0		1	0	0	0	0	0	0	0	0	0	0	0	0	0	0	0		0	0	1	1	1	0
1702	AC206325.3_FG003	0	0	0	0	0	0	0		0	0	0	0	0	0	0	0	0	0	0	0	0	0	0	0		0	0	0	0	0	0	0	0	0	0	0	0	0	0	0	0		4	8	8	5	3	10
1703	AC206332.3_FG005	0	0	0	0	0	0	0		1	0	0	0	0	0	1	0	0	0	0	1	0	1	0	4		0	0	0	1	0	0	0	0	0	0	0	0	0	0	0	0		4	11	5	4	2	7
1704	AC206349.2_FG002	0	0	0	0	0	0	0		0	0	0	0	0	0	0	0	0	0	0	0	0	0	0	0		0	0	0	0	0	0	0	0	0	0	0	0	0	0	0	0		1	0	0	0	0	0
1705	AC206350.3_FG005	0	0	0	0	1	1	1		111	0	80	0	121	0	160	2	0	37	1	37	1	64	1	58		50	29	48	18	95	40	86	53	78	36	50	24	80	50	64	30		562	205	369	506	382	165
1706	AC206392.3_FG004	0	0	0	0	0	0	0		0	0	0	0	0	0	0	0	0	0	0	0	0	0	0	0		0	0	0	0	0	0	0	0	0	0	0	0	0	0	0	0		0	3	1	0	0	2
1707	AC206425.3_FG002	0	0	0	0	0	1	0		1	0	2	0	2	0	3	0	0	1	0	1	0	4	0	2		0	0	0	0	0	1	2	3	1	2	0	0	0	1	0	5		1472	874	1471	1274	985	906
1708	AC206425.3_FG004	0	0	0	0	0	0	0		0	0	0	0	0	0	0	0	0	0	0	0	0	0	0	0		0	0	0	0	0	0	0	0	0	0	0	0	0	0	0	0		0	0	0	0	0	0
1709	AC206503.3_FG001	0	0	0	0	0	0	0		0	0	0	0	0	0	0	0	0	0	0	0	0	0	1	0		1	0	0	0	0	0	0	0	0	0	0	0	0	0	0	0		1	3	2	1	0	5
1710	AC206514.2_FG002	0	0	0	0	0	0	0		0	0	0	0	0	0	0	0	0	0	0	0	0	0	0	0		0	0	0	0	0	0	0	0	0	0	0	0	0	0	0	0		1	0	0	0	1	1
1711	AC206519.2_FG002	0	0	0	0	0	0	0		0	0	0	0	0	0	0	0	0	0	0	0	0	0	0	0		0	0	0	0	0	0	0	0	0	0	0	0	0	0	0	0		0	1	0	1	0	1
1712	AC206547.2_FG002	0	0	0	0	0	0	0		0	0	0	0	0	0	0	0	0	0	0	0	0	0	0	0		0	0	0	0	0	0	0	0	0	0	0	0	0	0	0	0		0	0	0	0	0	0
1713	AC206582.2_FG002	0	0	0	0	0	0	0		0	0	0	0	0	0	0	0	0	0	0	0	0	0	0	0		0	0	0	0	0	0	0	0	0	0	0	0	0	0	0	0		20	15	13	9	11	15
1714	AC206610.4_FG004	0	0	0	0	0	0	0		0	0	0	0	0	0	0	0	0	0	0	0	0	0	0	0		0	0	0	0	0	0	0	0	0	0	0	0	0	0	0	0		0	0	0	0	0	1
1715	AC206610.4_FG005	0	0	0	0	0	0	0		0	0	0	0	0	0	0	0	0	0	0	0	0	0	0	0		0	0	0	0	0	0	0	0	0	0	0	0	0	0	0	0		2	1	1	2	2	0
1716	AC206611.3_FG002	0	0	0	0	0	0	0		0	0	0	0	0	0	0	0	0	0	0	0	0	0	0	0		0	0	0	0	0	0	0	0	0	0	0	0	0	0	0	0		0	0	0	0	0	0
1717	AC206611.3_FG003	0	0	1	0	0	0	0		0	0	0	0	0	0	0	0	0	1	1	0	0	0	0	1		0	0	3	0	0	0	0	0	0	1	0	0	0	0	1	0		0	1	2	3	0	1
1718	AC206634.3_FG004	0	0	0	0	0	0	0		0	0	0	0	0	0	0	0	0	0	0	0	0	0	0	0		0	0	0	0	0	0	0	0	0	0	0	0	0	0	0	0		4	2	1	0	2	0
1719	AC206638.3_FG007	0	0	0	0	0	0	0		0	0	0	0	0	0	0	0	0	0	0	0	0	0	0	0		0	0	0	0	0	0	0	0	0	0	0	0	0	0	0	0		4	4	2	2	4	4
1720	AC206638.3_FG015	0	0	0	0	0	0	0		0	0	0	0	0	0	0	0	0	0	0	0	0	0	0	0		0	0	0	0	0	0	0	0	0	0	0	0	0	0	0	0		0	0	0	0	0	0
1721	AC206642.4_FG001	0	0	0	0	0	0	0		0	0	0	0	0	0	0	0	0	3	0	0	0	1	0	2		0	1	0	0	0	1	1	2	0	1	0	0	0	0	1	3		1372	987	1332	1013	1105	883
1722	AC206647.3_FG003	0	0	0	0	0	0	0		0	0	0	0	0	0	0	0	0	0	0	0	0	0	0	0		0	0	0	0	0	0	0	0	0	0	0	0	0	0	0	0		0	0	0	0	1	0
1723	AC206655.3_FG004	0	0	0	0	0	0	0		0	0	0	0	0	0	0	0	0	0	0	0	0	0	0	0		0	0	0	0	0	0	0	0	0	0	0	0	0	0	0	0		0	0	1	1	3	2
1724	AC206695.3_FG001	0	0	0	0	0	0	0		0	0	0	0	0	0	0	0	0	0	0	0	0	0	0	0		0	0	0	0	0	0	0	0	0	0	0	0	0	0	0	0		0	1	0	0	0	1
1725	AC206698.2_FG002	0	0	0	0	0	0	0		0	0	0	0	0	0	0	0	0	0	0	0	0	0	0	0		0	0	0	0	0	0	0	0	0	0	0	0	0	0	0	0		4	0	1	0	1	0
1726	AC206700.3_FG003	0	0	0	0	0	0	0		0	0	0	0	0	0	0	0	1	0	0	0	0	1	0	0		0	0	0	0	0	0	1	0	0	0	0	0	0	0	0	0		1	2	2	2	0	0
1727	AC206749.3_FG003	0	0	0	0	0	0	0		0	0	0	0	0	0	0	0	0	0	0	0	0	0	0	0		0	0	0	0	0	0	0	0	0	0	0	0	0	0	0	0		0	0	0	0	0	0
1728	AC206763.3_FG002	0	0	0	0	0	0	0		0	0	0	0	0	0	0	0	0	0	0	0	0	0	0	0		0	0	0	0	0	0	0	0	0	0	0	0	0	0	0	0		2	2	0	1	1	3
1729	AC206764.4_FG001	0	0	0	0	0	0	0		0	0	0	0	0	0	0	0	0	0	0	0	0	0	0	0		0	0	0	0	0	0	0	0	0	0	0	0	0	0	0	0		19	37	20	23	16	28
1730	AC206764.4_FG003	0	0	0	0	0	0	0		0	0	0	0	0	0	0	0	0	0	0	0	0	0	0	0		0	0	0	0	0	0	0	0	0	0	0	0	0	0	0	0		2	0	1	1	1	0
1731	AC206768.3_FG005	0	0	0	0	0	0	0		0	0	0	0	0	0	0	0	0	0	0	0	0	0	0	0		0	0	0	0	0	0	0	0	0	0	0	0	0	0	0	0		4	3	5	3	4	3
1732	AC206768.3_FG006	0	0	0	0	0	0	0		0	0	0	0	0	0	0	0	0	0	0	0	0	0	0	0		0	0	0	0	0	0	0	0	0	0	0	0	0	0	0	0		1	4	1	1	2	2
1733	AC206780.3_FG004	0	0	0	0	0	0	0		1	0	0	0	0	0	0	0	0	0	0	0	0	0	0	0		0	0	2	0	0	0	0	0	0	0	3	0	0	0	1	0		14	10	11	17	13	11
1734	AC206788.3_FG008	0	0	0	0	1	1	1		28	0	38	0	20	0	18	0	0	14	0	13	0	4	0	15		13	3	35	6	11	2	10	2	20	4	24	5	12	3	13	5		54	21	42	45	82	24
1735	AC206788.3_FG015	0	0	0	0	0	1	0		123	1	93	2	76	0	73	0	1	102	1	68	0	71	0	146		47	36	46	47	48	38	33	27	46	30	48	44	50	28	41	45		479	444	331	286	358	275
1736	AC206831.3_FG015	0	0	0	0	0	0	0		1	0	0	0	1	0	1	0	0	0	0	0	0	0	0	0		0	0	1	0	0	0	0	0	0	0	0	0	0	0	0	0		2	2	3	4	1	1
1737	AC206832.3_FG004	0	0	0	0	0	0	0		0	0	0	0	0	0	0	0	0	0	0	0	1	0	0	0		0	0	0	0	0	0	0	0	0	0	0	0	0	0	0	0		2	1	1	0	0	0
1738	AC206840.3_FG002	0	0	0	0	0	0	0		0	0	0	0	0	0	0	0	0	0	0	0	0	0	0	0		0	0	0	0	0	0	0	0	0	0	0	0	0	0	0	0		74	79	65	104	78	72
1739	AC206898.3_FG006	0	0	0	0	0	0	0		0	0	0	0	0	0	0	0	0	0	0	0	0	0	0	0		0	0	0	0	0	0	0	0	0	0	0	0	0	0	0	0		25	23	37	35	20	23
1740	AC206901.3_FG005	0	0	0	0	1	1	1		40	0	36	0	46	0	52	0	0	15	1	8	1	25	1	24		16	4	7	6	32	16	28	14	17	8	21	6	29	17	22	13		181	99	138	163	151	96
1741	AC206941.2_FG002	0	0	0	0	0	0	0		0	0	0	0	0	0	0	0	0	0	0	0	0	0	0	0		0	0	0	0	0	0	1	0	1	0	0	0	0	0	0	0		0	0	1	2	1	1
1742	AC206946.2_FG009	0	0	0	0	0	0	0		0	0	0	0	0	0	0	0	0	0	0	0	0	0	0	0		0	0	0	0	0	0	0	0	0	0	0	0	0	0	0	0		3	1	1	0	0	0
1743	AC206951.3_FG014	0	0	0	0	0	0	0		0	0	0	0	0	0	0	0	0	0	0	0	0	0	0	0		0	0	0	0	0	0	0	0	0	0	0	0	0	0	0	0		1	0	0	0	0	1
1744	AC206951.3_FG016	0	0	0	0	1	0	0		9	0	6	0	13	0	22	1	0	5	0	4	0	6	0	10		6	2	4	1	10	5	6	4	8	2	6	0	2	5	4	3		17	17	22	27	9	20
1745	AC206951.3_FG017	0	0	0	0	1	0	0		58	1	57	0	62	1	64	0	0	26	0	22	2	57	1	38		22	30	13	18	22	27	28	40	26	20	22	25	20	31	22	20		220	159	260	214	210	152
1746	AC206952.3_FG001	0	0	0	0	0	0	0		0	0	0	0	0	0	0	0	0	0	0	0	0	0	0	0		0	0	0	0	0	0	0	0	0	0	0	0	0	0	0	0		0	0	1	1	0	0
1747	AC206968.3_FG001	0	0	0	0	0	0	0		0	0	0	0	0	0	0	0	0	0	0	0	0	0	0	0		0	0	0	0	0	0	0	0	0	0	0	0	0	0	0	0		0	0	0	0	0	0
1748	AC206968.3_FG003	0	0	0	0	0	0	0		0	0	0	0	0	0	0	0	0	0	0	0	0	0	0	0		0	0	0	0	0	0	0	0	0	0	0	0	0	0	0	0		470	648	548	671	427	571
1749	AC206969.3_FG001	0	0	0	0	0	0	0		0	0	0	0	0	0	0	0	0	0	0	0	0	0	0	0		0	0	0	0	0	0	0	0	0	0	0	0	0	0	0	0		0	1	1	1	0	1
1750	AC206980.3_FG007	0	0	0	0	0	0	0		0	0	0	0	0	0	0	0	0	0	0	0	0	0	0	0		0	0	0	0	0	0	0	0	0	0	0	0	0	0	0	0		3	3	2	5	1	3
1751	AC206989.4_FG002	0	0	0	0	0	0	0		0	0	0	0	0	0	0	0	0	0	0	0	0	0	0	0		0	0	0	0	0	0	0	0	0	0	0	0	0	0	0	0		80	92	89	113	92	91
1752	AC206999.1_FG002	0	0	0	0	0	0	0		0	0	0	0	0	0	0	0	0	0	0	0	0	0	0	0		0	0	0	0	0	0	0	0	0	0	0	0	0	0	0	0		2	1	2	2	1	1
1753	AC206999.1_FG007	0	0	0	0	0	0	0		0	0	0	0	0	0	0	0	0	0	0	0	0	0	0	0		0	0	0	0	0	0	0	0	0	0	0	0	0	0	0	0		0	0	0	0	0	0
1754	AC207011.3_FG001	0	0	0	0	0	0	0		0	0	0	0	0	0	0	0	0	0	0	0	0	0	0	0		0	0	0	0	0	0	0	0	0	0	0	0	0	0	0	0		0	1	0	0	0	0
1755	AC207019.3_FG003	0	0	0	0	0	0	0		0	0	0	0	0	0	0	0	0	0	0	0	0	0	0	0		0	0	0	0	0	0	0	0	0	0	0	0	0	0	0	0		0	0	0	0	0	0
1756	AC207024.3_FG002	0	0	0	0	0	0	0		0	0	2	0	0	0	0	0	0	0	0	0	0	0	0	0		0	0	0	0	0	0	0	0	0	0	0	0	0	0	0	0		0	3	2	2	2	2
1757	AC207043.3_FG002	0	0	0	0	0	0	0		6	0	6	0	7	0	7	0	0	0	0	2	0	8	0	10		1	2	0	0	2	3	2	3	3	1	0	1	3	1	2	1		99	87	103	108	103	57
1758	AC207043.3_FG004	0	0	0	0	0	0	0		0	0	0	0	0	0	0	0	0	0	0	0	0	0	0	0		0	0	0	0	0	0	0	0	0	0	0	0	0	0	0	0		0	0	0	1	0	0
1759	AC207080.3_FG005	0	0	0	0	0	0	0		0	0	0	0	0	0	0	0	0	0	0	0	0	0	0	0		0	0	0	0	0	0	0	0	0	0	0	0	0	0	0	0		0	0	0	0	0	0
1760	AC207104.3_FG001	0	0	0	0	0	0	0		0	0	0	0	0	0	0	0	0	0	0	0	0	0	0	0		0	0	0	0	0	0	0	0	0	0	0	0	0	0	0	0		0	0	1	0	1	1
1761	AC207107.4_FG001	0	0	0	0	0	0	0		0	0	0	0	0	0	0	0	0	0	0	0	1	0	0	0		0	0	0	0	0	0	0	0	0	0	0	0	0	0	0	0		0	0	0	0	1	0
1762	AC207107.4_FG002	0	0	0	0	0	0	0		0	0	0	0	0	0	0	0	0	1	0	2	0	0	0	2		0	1	0	0	0	0	0	0	0	1	0	0	0	0	0	0		0	6	2	3	2	2
1763	AC207119.3_FG001	0	0	0	0	0	0	0		0	0	0	0	0	0	0	0	0	0	0	0	0	0	0	0		0	0	0	0	0	0	0	0	0	0	0	0	0	0	0	0		0	1	0	0	1	0
1764	AC207188.3_FG002	0	0	0	0	0	0	0		0	0	0	0	0	0	0	0	0	0	0	0	0	0	0	0		0	0	0	0	0	0	0	0	0	0	0	0	0	0	0	0		2	6	5	7	4	8
1765	AC207189.4_FG002	0	0	0	0	0	0	0		1	0	1	0	1	0	0	0	0	4	0	1	0	2	0	14		0	2	1	0	0	0	1	0	2	1	1	1	2	2	0	0		2	11	2	4	1	3
1766	AC207205.3_FG004	0	0	0	0	0	0	0		2	0	1	0	0	0	1	0	0	0	0	0	0	0	0	0		0	0	0	0	1	0	0	0	1	0	0	1	0	0	1	0		2	4	1	1	5	1
1767	AC207206.3_FG001	0	0	0	0	0	0	0		0	0	0	0	0	0	0	0	0	0	0	0	0	0	0	0		0	0	0	0	0	0	0	0	0	0	0	0	0	0	0	0		0	0	0	1	3	0
1768	AC207206.3_FG003	0	0	0	0	0	0	0		0	0	0	0	0	0	0	0	0	0	0	0	0	0	0	0		0	0	0	0	0	0	0	0	0	0	0	0	0	0	0	0		0	0	0	0	1	0
1769	AC207225.3_FG001	0	0	0	0	0	0	0		0	0	0	0	0	0	0	0	0	0	0	0	0	0	0	0		0	0	0	0	0	0	0	0	0	0	0	0	0	0	0	0		0	2	2	0	0	1
1770	AC207225.3_FG003	0	0	0	0	0	0	0		0	0	0	0	0	0	0	0	0	0	0	0	0	0	0	0		0	0	0	0	0	0	0	0	0	0	0	0	0	0	0	0		24	17	27	24	29	23
1771	AC207231.3_FG001	0	0	0	0	0	0	0		0	0	0	0	0	0	0	0	0	0	0	0	0	0	0	0		0	0	0	0	0	0	0	0	0	0	0	0	0	0	0	0		0	1	0	0	0	0
1772	AC207254.3_FG005	0	0	0	0	0	0	0		0	0	0	0	0	0	0	0	0	0	0	0	0	0	0	0		0	0	0	0	0	0	0	0	0	0	0	0	0	0	0	0		0	0	1	0	0	0
1773	AC207260.3_FG003	0	0	0	0	0	0	0		0	0	0	0	0	0	0	0	0	0	0	0	0	0	0	0		0	0	0	0	0	0	0	0	0	0	0	0	0	0	0	0		11	0	12	6	10	0
1774	AC207260.3_FG004	0	0	0	0	0	0	0		0	0	1	0	0	0	0	0	0	0	0	0	1	0	0	0		0	0	1	0	0	0	1	0	1	0	0	0	0	0	0	0		6	3	2	5	3	6
1775	AC207265.3_FG002	0	0	0	0	0	0	0		67	0	66	1	120	0	123	1	1	35	0	36	0	85	0	72		29	29	30	23	70	45	60	57	38	22	35	34	36	38	55	40		694	642	662	750	693	573
1776	AC207309.3_FG007	0	0	0	0	0	0	0		0	0	0	0	0	0	0	0	0	0	0	0	0	0	0	0		0	0	0	0	0	0	0	0	0	0	0	0	0	0	0	0		66	73	70	35	61	56
1777	AC207309.3_FG010	0	0	0	0	0	0	0		0	0	0	0	0	0	0	0	0	0	0	0	0	0	0	0		0	0	0	0	0	0	0	0	0	0	0	0	0	0	0	0		0	0	0	0	0	0
1778	AC207321.3_FG003	0	0	0	0	0	0	0		0	0	0	0	0	0	0	0	0	0	0	0	0	0	0	0		0	0	0	0	0	0	0	0	0	0	0	0	0	0	0	0		1	0	0	1	0	0
1779	AC207328.3_FG003	0	0	0	0	0	0	0		0	0	0	0	0	0	0	0	0	0	0	0	0	0	0	0		0	0	0	0	0	0	0	0	0	0	0	0	0	0	0	0		2	3	4	1	1	5
1780	AC207342.3_FG001	0	0	0	0	0	0	0		0	0	0	0	0	0	0	0	0	0	0	0	0	0	0	0		0	0	0	0	0	0	0	0	0	0	0	0	0	0	0	0		2	0	2	0	0	1
1781	AC207342.3_FG007	0	0	0	0	1	0	0		13	0	15	0	14	0	21	0	1	29	0	22	1	21	0	19		4	8	12	16	10	14	5	13	13	8	4	6	11	10	13	6		135	171	126	140	101	127
1782	AC207342.3_FG008	0	0	0	0	1	1	1		5	0	6	0	15	0	17	0	0	4	0	4	0	6	0	2		3	0	2	0	7	1	8	4	9	1	8	1	11	2	8	2		1549	731	1423	871	1228	714
1783	AC207347.3_FG005	0	0	0	0	0	0	0		16	0	13	0	17	0	8	0	0	17	1	15	0	13	0	20		9	7	12	6	11	8	9	9	9	7	8	8	10	4	7	7		322	616	403	514	347	527
1784	AC207383.3_FG003	0	0	0	0	0	0	0		0	0	0	0	0	0	0	0	0	0	0	0	0	0	0	0		0	0	0	0	0	0	0	0	0	0	0	0	0	0	0	0		1	8	5	8	1	4
1785	AC207389.3_FG004	0	0	0	0	0	0	0		0	0	0	0	0	0	0	0	0	0	0	0	0	0	0	0		0	0	0	0	0	0	0	0	0	0	0	0	0	0	0	0		2	0	0	0	0	1
1786	AC207397.3_FG001	0	0	0	0	0	0	0		0	0	0	0	0	0	0	0	0	0	0	0	0	0	0	0		0	0	0	0	0	0	0	0	0	0	0	0	0	0	0	0		2	1	3	1	1	3
1787	AC207427.3_FG005	0	0	0	0	0	0	0		0	0	0	0	0	0	0	0	1	0	0	0	0	0	0	0		1	0	0	0	0	0	0	0	0	0	0	0	0	0	0	0		14	15	12	28	15	14
1788	AC207454.3_FG004	0	0	0	0	0	0	0		0	0	0	0	0	0	0	0	0	0	0	0	0	0	0	0		0	0	0	0	0	0	0	0	0	0	0	0	0	0	0	0		0	0	0	0	0	0
1789	AC207472.3_FG001	0	0	0	0	0	0	0		0	0	0	0	0	0	0	0	0	0	0	0	0	0	0	0		0	0	0	0	0	0	0	0	0	0	0	0	0	0	0	0		0	0	1	0	0	0
1790	AC207533.2_FG002	0	0	0	0	0	0	0		11	0	9	0	5	0	9	0	0	4	0	4	0	9	0	4		3	1	2	2	1	5	2	2	1	4	1	1	0	1	2	1		26	11	18	16	23	11
1791	AC207544.3_FG011	0	0	0	0	0	0	0		0	0	0	0	0	0	0	0	0	0	0	0	0	0	0	0		0	0	0	0	0	0	0	0	0	0	0	0	0	0	0	0		1	1	2	0	1	1
1792	AC207546.3_FG004	0	0	0	0	0	0	0		0	0	0	0	0	0	0	0	0	0	0	0	0	2	0	1		0	0	1	0	0	0	0	0	0	0	0	0	0	3	0	0		5	5	2	4	1	5
1793	AC207549.3_FG010	0	0	0	0	0	0	0		0	0	0	0	0	0	0	0	0	0	0	0	0	0	0	0		0	0	0	0	0	0	0	0	0	0	0	0	0	0	0	0		1	0	1	1	0	0
1794	AC207575.3_FG004	0	0	0	0	0	0	0		0	0	0	0	0	0	0	0	0	0	0	0	0	0	0	0		0	0	0	0	0	0	0	0	0	0	0	0	0	0	0	0		0	1	0	1	1	0
1795	AC207619.3_FG001	0	0	0	0	0	0	0		0	0	0	0	0	0	0	0	0	0	0	0	0	0	0	0		0	0	0	0	0	0	0	0	0	0	0	0	0	0	0	0		0	1	0	0	0	0
1796	AC207620.2_FG007	0	0	0	0	0	0	0		0	0	0	0	0	0	0	0	0	0	0	0	0	0	0	0		0	0	0	0	0	0	0	0	0	0	0	0	0	0	0	0		0	1	0	0	0	0
1797	AC207628.4_FG002	0	0	0	0	0	0	0		0	0	0	0	0	0	0	0	0	0	0	0	0	0	0	0		0	0	0	0	0	0	0	0	0	0	0	0	0	0	0	0		0	0	0	1	0	0
1798	AC207628.4_FG003	0	0	0	0	0	0	0		0	0	0	0	0	0	0	0	0	0	0	0	0	0	0	0		0	0	0	0	0	0	0	0	0	0	0	0	0	0	0	0		53	68	53	66	48	51
1799	AC207628.4_FG005	0	0	0	0	0	0	0		0	0	0	0	0	0	0	0	0	0	0	0	0	0	0	0		0	0	0	0	0	0	0	0	0	0	0	0	0	0	0	0		4	10	7	5	3	3
1800	AC207628.4_FG009	0	0	0	0	1	1	1		76	1	89	1	43	0	25	0	0	56	2	65	0	39	2	39		50	18	64	29	25	18	29	14	52	27	46	27	23	24	25	11		307	282	285	360	339	303
1801	AC207628.4_FG010	0	0	0	0	1	1	1		11	0	16	0	27	0	19	0	0	0	1	0	1	0	0	0		4	0	3	0	17	0	18	0	5	0	4	0	12	0	8	0		77	0	24	28	73	2
1802	AC207628.4_FG011	0	0	0	0	0	0	0		0	0	0	0	0	0	0	0	0	0	0	0	0	0	0	0		0	0	0	0	0	0	0	0	0	0	0	0	0	0	0	0		527	659	562	659	481	582
1803	AC207649.3_FG002	0	0	0	0	0	0	0		0	0	0	0	0	0	0	0	0	0	0	0	0	0	0	0		0	0	0	0	0	0	0	0	0	0	0	0	0	0	0	0		0	0	1	1	0	0
1804	AC207652.3_FG001	0	0	0	0	0	0	0		12	0	9	0	1	0	0	0	0	15	0	18	0	1	0	2		7	7	16	11	0	0	0	0	7	7	9	5	1	1	0	0		362	391	425	516	399	482
1805	AC207655.2_FG003	0	0	0	0	0	0	0		0	0	0	0	0	0	0	0	0	0	0	0	0	0	0	0		0	0	0	0	0	0	0	0	0	0	0	0	0	0	0	0		2	5	0	3	0	3
1806	AC207656.3_FG002	0	0	0	0	0	0	0		2	0	3	0	3	0	4	0	0	0	0	1	0	4	0	5		1	3	1	0	1	0	3	3	1	1	1	2	0	1	3	1		303	178	347	355	294	176
1807	AC207722.2_FG009	0	0	0	0	0	0	0		5	0	1	0	3	0	2	0	0	2	0	4	0	5	0	4		0	0	1	0	3	0	2	2	1	1	1	2	3	1	0	0		13	17	7	12	7	21
1808	AC207728.2_FG003	0	0	0	0	0	0	0		1	0	0	0	0	0	0	0	0	0	1	0	0	0	0	0		0	0	0	0	1	0	1	0	0	0	0	1	0	0	1	0		26	65	74	42	35	51
1809	AC207732.3_FG010	0	0	0	0	0	0	0		0	0	0	0	0	0	0	0	0	0	0	0	0	0	0	0		0	0	0	0	0	0	0	0	0	0	0	0	0	0	0	0		4	1	1	4	3	2
1810	AC207733.3_FG001	0	0	0	0	0	0	0		0	0	0	0	0	0	0	0	0	0	0	0	0	0	0	0		0	0	0	0	0	0	0	0	0	0	0	0	0	0	0	0		0	0	0	0	0	0
1811	AC207733.3_FG007	0	0	0	0	0	0	0		0	0	0	0	0	0	0	0	0	0	0	0	0	0	0	0		0	0	0	0	0	0	0	0	0	0	0	0	0	0	0	0		0	0	0	0	0	0
1812	AC207740.3_FG005	0	0	0	0	0	0	0		0	0	0	0	0	0	0	0	0	0	0	0	0	0	0	0		0	0	0	0	0	0	0	0	0	0	0	0	0	0	0	0		1	0	0	0	0	0
1813	AC207755.3_FG005	0	0	0	0	1	0	0		0	0	4	0	1	0	1	0	0	0	0	4	0	1	0	1		2	0	3	0	5	0	1	1	1	2	0	0	1	2	0	0		123	36	93	80	136	45
1814	AC207756.3_FG001	0	0	0	0	0	0	0		0	0	0	0	0	0	0	0	0	0	0	0	0	0	0	0		0	0	0	0	0	0	0	0	0	0	0	0	0	0	0	0		83	77	76	101	94	84
1815	AC207767.2_FG001	0	0	0	0	0	0	0		0	0	0	0	0	0	0	0	0	0	0	0	0	0	0	0		0	0	0	0	0	0	0	0	0	0	0	0	0	0	0	0		0	0	0	1	0	0
1816	AC207784.3_FG007	0	0	0	0	0	0	0		0	0	0	0	0	0	0	0	0	0	0	0	0	0	0	0		0	0	0	0	0	0	0	0	0	0	0	0	0	0	0	0		2	1	5	2	1	1
1817	AC207790.2_FG001	0	0	0	0	0	0	0		0	0	0	0	0	0	0	0	0	0	0	0	0	0	0	0		0	0	0	0	0	0	0	0	0	0	0	0	0	0	0	0		0	2	0	0	1	0
1818	AC207793.3_FG002	0	0	0	0	0	0	0		0	0	0	0	0	0	0	0	0	0	0	0	0	0	0	0		0	0	0	0	0	0	0	0	0	0	0	0	0	0	0	0		9	0	4	3	9	1
1819	AC207798.2_FG003	0	0	0	0	0	0	0		30	0	17	0	22	0	32	0	0	9	0	10	0	18	0	19		11	6	17	6	14	15	16	15	13	11	10	11	8	9	16	13		132	94	119	92	114	71
1820	AC207803.3_FG003	0	0	0	0	0	0	0		0	0	0	0	0	0	0	0	0	0	0	0	0	0	0	0		0	0	0	0	0	0	0	0	0	0	0	0	0	0	0	0		0	0	0	0	0	0
1821	AC207814.3_FG002	0	0	0	0	0	0	0		0	0	0	0	0	0	0	0	0	0	0	0	0	0	0	0		0	0	0	0	0	0	0	0	0	0	0	0	0	0	0	0		3	1	0	1	1	0
1822	AC207814.3_FG003	0	0	1	0	0	0	0		1	0	0	0	0	0	0	0	0	7	0	7	0	3	0	1		0	2	2	1	1	2	0	3	2	0	2	3	0	1	0	5		1	56	22	20	0	39
1823	AC207888.3_FG009	0	0	0	0	0	0	0		0	0	0	0	1	0	2	0	0	0	0	0	0	0	0	0		2	0	1	0	1	0	0	0	0	0	1	0	0	0	0	0		4	4	3	3	4	3
1824	AC207890.3_FG002	0	0	0	0	0	0	0		0	0	0	0	0	0	0	0	0	0	0	0	0	0	0	0		0	0	0	0	0	0	0	0	0	0	0	0	0	0	0	0		3069	3080	3129	3104	2790	2707
1825	AC207896.4_FG003	0	0	0	0	0	0	0		0	0	0	0	0	0	0	0	0	0	0	0	0	0	0	0		0	0	0	0	0	0	0	0	0	0	0	0	0	0	0	0		0	0	0	0	0	0
1826	AC208023.3_FG001	0	0	0	0	0	0	0		0	0	0	0	0	0	0	0	0	0	0	0	0	0	0	0		0	0	0	0	0	0	0	0	0	0	0	0	0	0	0	0		1125	902	1064	789	827	718
1827	AC208026.3_FG005	0	0	0	0	0	0	0		0	0	0	0	0	0	0	0	0	0	0	0	0	0	0	0		0	0	0	0	0	0	0	0	0	0	0	0	0	0	0	0		0	1	0	0	0	0
1828	AC208031.3_FG002	0	0	0	0	0	1	0		21	0	31	0	2	0	5	0	0	45	0	42	0	11	0	15		8	17	22	22	1	5	3	6	20	29	8	21	3	6	0	5		153	290	176	269	209	274
1829	AC208031.3_FG005	0	0	0	0	0	0	0		1	0	1	0	0	0	0	0	0	1	0	1	1	0	0	2		1	0	1	0	0	0	0	0	0	0	1	0	0	0	0	1		16	9	7	14	15	14
1830	AC208035.3_FG002	0	0	0	0	0	0	0		0	0	0	0	0	0	0	0	0	0	0	0	0	0	0	0		0	0	0	0	0	0	0	0	0	0	0	0	0	0	0	0		0	0	0	0	0	0
1831	AC208042.3_FG005	0	0	0	0	0	0	0		0	0	0	0	0	0	0	0	0	0	0	0	0	0	0	0		0	0	0	0	0	0	0	0	0	0	0	0	0	0	0	0		0	0	0	1	0	0
1832	AC208079.3_FG001	0	0	0	0	0	0	0		0	0	0	0	0	0	0	0	0	0	0	0	0	0	0	0		0	0	0	0	0	0	0	0	0	0	0	0	0	0	0	0		0	0	1	0	0	1
1833	AC208082.3_FG008	0	0	0	0	0	0	0		1	0	0	0	0	0	0	0	0	0	0	0	0	0	0	0		0	0	0	0	0	0	0	0	0	0	0	0	0	0	0	0		1	1	0	0	1	0
1834	AC208109.2_FG004	0	0	0	0	0	0	0		0	0	0	0	0	0	0	0	0	0	0	0	0	0	0	0		0	0	0	0	0	0	0	0	0	0	0	0	0	0	0	0		0	4	0	4	2	1
1835	AC208110.2_FG001	0	0	0	0	0	0	0		0	0	0	0	0	0	0	0	0	0	0	0	0	0	0	0		0	0	0	0	0	0	0	0	0	0	0	0	0	0	0	0		59	60	66	66	56	46
1836	AC208110.2_FG005	0	0	0	0	0	0	0		0	0	0	0	0	0	0	0	0	0	0	0	0	0	0	0		0	0	0	0	0	0	0	0	0	0	0	0	0	0	0	0		2	1	1	0	0	1
1837	AC208110.2_FG006	0	0	0	0	0	0	0		0	0	0	0	0	0	0	0	0	0	0	0	0	0	0	0		0	0	0	0	0	0	0	0	0	0	0	0	0	0	0	0		643	476	413	519	574	502
1838	AC208110.2_FG007	0	0	0	0	0	0	0		0	0	0	0	0	0	0	0	0	0	0	0	0	0	0	0		0	0	0	0	0	0	0	0	0	0	0	0	0	0	0	0		389	227	304	350	278	220
1839	AC208110.2_FG011	0	0	0	0	0	0	0		0	0	0	0	0	0	0	0	0	0	0	0	0	0	0	0		0	0	0	0	0	0	0	0	0	0	0	0	0	0	0	0		5	5	6	4	3	3
1840	AC208113.3_FG001	0	0	0	0	0	0	0		0	0	0	0	0	0	0	0	1	0	0	0	0	0	0	0		0	0	0	0	0	0	0	0	0	0	0	0	0	0	0	0		0	1	1	1	0	1
1841	AC208113.3_FG005	0	0	0	0	0	1	0		53	0	35	0	55	0	39	0	2	27	1	28	0	24	1	51		32	25	19	17	18	17	13	16	16	7	31	16	20	16	23	17		97	73	95	53	72	47
1842	AC208113.3_FG009	0	1	0	0	0	0	0		0	0	0	0	0	0	0	0	0	0	0	0	0	0	0	0		0	0	0	0	0	0	0	0	0	0	0	0	0	0	0	0		40	0	34	21	37	1
1843	AC208122.2_FG003	0	0	0	0	0	0	0		0	0	0	0	0	0	0	0	0	0	0	0	0	0	0	0		0	0	0	0	0	0	0	0	0	0	0	0	0	0	0	0		1	0	0	1	2	1
1844	AC208126.3_FG001	0	0	0	0	0	0	0		0	0	0	0	0	0	0	0	0	0	0	0	0	0	0	0		0	0	0	1	0	0	0	0	0	0	0	0	0	0	0	0		0	1	1	1	1	0
1845	AC208201.3_FG001	0	0	0	0	1	1	1		63	2	51	0	81	0	88	0	0	31	0	31	0	69	0	65		24	15	27	14	70	47	51	44	46	35	25	15	70	39	66	41		382	259	321	448	349	260
1846	AC208201.3_FG002	0	0	0	0	0	0	0		0	0	0	0	0	0	0	0	0	0	0	0	0	0	0	0		0	0	0	0	0	0	0	0	0	0	0	0	0	0	0	0		188	148	194	176	174	109
1847	AC208201.3_FG003	0	0	0	0	1	1	1		108	0	93	1	108	0	140	0	1	59	0	61	1	99	0	80		66	56	47	34	91	63	108	74	68	48	56	43	77	52	67	53		1241	893	1302	1142	944	810
1848	AC208204.3_FG006	0	0	0	0	0	0	0		0	0	0	0	0	0	0	0	0	0	0	0	0	0	0	0		0	0	0	0	0	0	0	0	0	0	0	0	0	0	0	0		36	81	30	21	36	93
1849	AC208212.3_FG001	0	0	0	0	0	0	0		0	0	0	0	0	0	0	0	0	0	0	0	0	0	0	0		0	0	0	0	0	0	0	0	0	0	0	0	0	0	0	0		0	1	1	2	0	2
1850	AC208217.3_FG001	0	0	0	0	0	0	0		0	0	0	0	0	0	0	0	0	0	0	0	0	0	0	0		0	0	0	0	0	0	0	0	0	0	0	0	0	0	0	0		0	2	3	4	1	5
1851	AC208221.3_FG002	0	0	0	0	1	1	1		0	0	0	0	0	0	0	0	1	77	1	76	2	154	0	130		0	17	0	9	2	43	1	42	1	19	0	17	2	50	0	29		5	259	42	73	2	231
1852	AC208308.3_FG003	0	0	0	0	0	0	0		0	0	0	0	0	0	0	0	0	0	0	0	0	0	0	0		0	0	0	0	0	0	0	0	0	0	0	0	0	0	0	0		1	3	1	1	0	0
1853	AC208308.3_FG004	0	0	0	0	0	0	0		0	0	0	0	0	0	0	0	0	0	0	0	0	0	0	0		0	0	0	0	0	0	0	0	0	0	0	0	0	0	0	0		0	0	0	0	0	0
1854	AC208327.4_FG002	0	0	1	0	0	0	0		0	0	0	0	0	0	0	0	0	0	0	0	0	0	0	0		0	0	0	0	0	0	0	0	0	0	0	0	0	0	0	0		1	9	5	5	0	4
1855	AC208327.4_FG003	0	0	0	0	0	0	0		1	0	3	0	2	0	0	0	1	0	0	2	0	0	0	0		2	1	4	1	0	0	1	0	2	1	0	4	0	0	2	0		806	885	791	953	775	767
1856	AC208327.4_FG006	0	0	0	0	0	0	0		0	0	0	0	0	0	0	0	0	0	0	0	0	0	0	0		0	0	0	0	0	0	0	0	0	0	0	0	0	0	0	0		295	280	273	260	253	283
1857	AC208337.2_FG003	0	0	0	0	0	0	0		1	0	1	0	0	0	0	0	1	0	0	0	1	0	0	0		0	0	1	0	1	0	0	0	0	0	0	0	0	0	1	0		7	10	6	9	9	5
1858	AC208338.3_FG010	0	0	0	0	0	0	0		0	0	0	0	0	0	0	0	0	0	0	0	0	0	0	0		2	0	0	0	1	0	0	0	1	0	1	0	1	0	0	0		0	5	3	1	1	0
1859	AC208341.4_FG005	0	0	0	0	0	0	0		0	0	0	0	0	0	0	0	0	0	0	0	0	0	0	0		0	0	0	0	0	0	0	0	0	0	0	0	0	0	0	0		180	98	202	140	171	93
1860	AC208341.4_FG006	0	0	0	0	0	0	0		0	0	1	0	0	0	0	0	0	0	0	0	0	0	0	0		0	0	2	0	0	0	0	0	0	0	0	0	0	0	0	0		24	40	42	71	46	57
1861	AC208341.4_FG007	0	0	0	0	0	0	0		0	0	0	0	0	0	0	0	0	0	0	0	0	0	0	0		0	0	0	0	0	0	0	0	0	0	0	0	0	0	0	0		0	0	0	0	0	0
1862	AC208341.4_FG008	0	0	0	0	0	0	0		0	0	0	0	0	0	0	0	0	0	0	0	0	0	0	0		0	0	0	0	0	0	0	0	0	0	0	0	0	0	0	0		0	1	1	0	0	0
1863	AC208346.3_FG004	0	0	0	0	1	0	0		24	1	19	0	21	0	30	0	0	13	0	14	0	21	0	19		17	8	16	8	14	11	22	9	12	6	10	15	16	12	18	13		179	118	152	172	172	86
1864	AC208348.3_FG012	0	0	0	0	0	0	0		0	0	0	0	0	0	0	0	0	0	0	0	0	0	0	0		0	0	0	0	0	0	0	0	0	0	0	0	0	0	0	0		95	34	73	40	74	27
1865	AC208358.3_FG005	0	0	0	0	0	0	0		0	0	1	0	2	0	0	0	0	0	0	0	0	0	0	1		0	0	0	0	1	0	0	0	0	1	0	0	0	1	1	0		4	3	3	5	4	3
1866	AC208406.3_FG004	0	0	0	0	0	0	0		0	0	0	0	0	0	0	0	0	0	0	0	0	0	0	0		0	0	0	0	0	0	0	0	0	0	0	0	0	0	0	0		0	0	0	0	0	0
1867	AC208411.3_FG013	0	0	0	0	0	0	0		0	0	0	0	0	0	0	0	0	0	0	0	0	0	0	0		0	0	0	0	0	0	0	0	0	0	0	0	0	0	0	0		0	0	0	0	0	0
1868	AC208418.3_FG009	0	0	0	0	0	0	0		0	0	0	0	0	0	0	0	0	0	0	0	0	0	0	0		1	0	0	0	0	0	0	0	0	0	0	0	1	0	0	0		1	1	1	0	1	0
1869	AC208422.3_FG001	0	0	0	0	0	0	0		0	0	0	0	0	0	0	0	0	0	0	0	0	0	0	0		0	0	0	0	0	0	0	0	0	0	0	0	0	0	0	0		0	0	0	0	0	0
1870	AC208422.3_FG002	0	0	0	0	0	0	0		0	0	0	0	0	0	0	0	0	0	0	0	0	0	0	0		0	0	0	0	0	0	0	0	0	0	0	0	0	0	0	0		0	0	0	0	0	0
1871	AC208423.3_FG002	0	0	0	0	0	0	0		0	0	0	0	0	0	0	0	0	0	0	0	0	0	0	0		0	0	0	0	0	1	0	0	0	0	0	0	0	0	0	0		0	1	1	0	0	0
1872	AC208434.3_FG001	0	0	1	0	0	0	0		0	0	0	0	0	0	0	0	0	0	0	0	0	0	0	0		0	0	0	0	0	0	0	0	0	0	0	0	0	0	0	0		1	9	2	3	0	5
1873	AC208434.3_FG007	0	0	0	0	0	0	0		0	0	0	0	0	0	0	0	0	0	0	0	0	0	0	0		2	0	0	0	0	0	0	0	0	0	0	0	0	0	0	0		0	0	2	0	0	0
1874	AC208436.3_FG007	0	0	0	0	0	0	0		12	0	9	0	4	0	4	0	0	20	0	19	0	8	0	3		8	4	13	9	2	2	1	1	10	5	7	4	3	3	3	2		79	128	72	130	73	127
1875	AC208440.3_FG003	0	0	0	0	1	1	1		35	0	41	0	23	0	18	0	0	28	0	29	1	19	1	33		21	14	26	15	15	11	13	8	26	23	19	7	19	12	21	4		198	180	216	279	213	199
1876	AC208445.3_FG001	0	0	0	0	0	0	0		0	0	0	0	0	0	0	0	0	0	0	0	0	0	0	0		0	0	0	0	0	0	0	0	0	0	0	0	0	0	0	0		0	0	0	0	0	0
1877	AC208445.3_FG006	0	0	0	0	0	0	0		0	0	0	0	0	0	0	0	0	0	0	0	0	0	0	0		0	0	0	0	0	0	0	0	0	0	0	0	0	0	0	0		0	0	0	0	0	0
1878	AC208453.3_FG003	0	0	0	0	0	0	0		0	0	0	0	0	0	0	0	0	0	1	0	0	0	0	0		0	0	0	0	0	0	0	0	0	0	0	0	0	0	0	0		1	1	0	1	0	1
1879	AC208454.3_FG002	0	0	0	0	0	0	0		0	0	0	0	0	0	0	0	0	0	0	0	0	0	0	0		0	0	0	0	0	0	0	0	0	0	1	1	0	1	0	0		2	4	1	2	0	1
1880	AC208458.3_FG011	0	0	0	0	0	0	0		0	0	0	0	0	0	0	0	0	0	0	0	0	0	0	0		0	0	0	0	0	0	0	0	0	0	0	0	0	0	0	0		4	5	0	1	4	2
1881	AC208516.2_FG008	0	0	0	0	0	0	0		0	0	0	0	0	0	0	0	0	0	0	0	0	0	0	0		0	0	0	0	0	0	0	0	0	0	0	0	0	0	0	0		2	0	0	2	0	0
1882	AC208521.3_FG002	0	0	0	0	0	0	0		0	0	0	0	0	0	0	0	1	0	0	1	0	0	0	0		0	0	0	1	1	0	0	0	0	1	1	0	0	0	0	0		2	6	10	3	2	2
1883	AC208530.3_FG003	0	0	0	0	0	0	0		0	0	0	0	0	0	0	0	0	0	0	0	0	0	0	0		0	0	0	0	0	0	0	0	0	0	0	0	0	0	0	0		0	0	0	0	0	1
1884	AC208539.3_FG002	0	0	0	0	0	0	0		0	0	0	0	0	0	0	0	0	0	0	0	1	0	0	0		0	0	0	0	0	0	0	0	0	0	0	0	0	0	0	0		1	2	1	0	0	0
1885	AC208539.3_FG003	0	0	0	0	0	0	0		0	0	0	0	0	0	0	0	0	0	0	0	0	0	0	0		0	0	0	0	0	0	0	0	0	0	0	0	0	0	0	0		0	0	0	0	0	0
1886	AC208559.3_FG003	0	0	1	0	1	1	1		1	0	0	0	0	0	0	0	1	20	0	24	1	28	0	18		1	9	0	10	1	21	0	17	1	24	1	11	1	13	0	20		2	44	26	46	1	52
1887	AC208564.3_FG004	0	0	0	0	0	0	0		0	0	0	0	0	0	0	0	0	0	0	0	0	0	0	0		0	0	0	0	0	0	0	0	0	0	0	0	0	0	0	0		1	0	3	1	0	1
1888	AC208571.4_FG001	0	0	0	0	0	0	0		16	0	7	1	3	0	4	0	0	18	0	8	0	6	0	5		2	4	11	9	1	3	2	0	6	5	7	2	2	0	4	6		73	65	68	77	79	69
1889	AC208576.3_FG001	0	0	0	0	0	0	0		2	0	1	0	1	0	0	0	0	0	2	0	0	0	0	0		0	0	1	1	1	0	0	0	0	1	0	0	1	0	0	0		5	5	3	5	7	6
1890	AC208577.3_FG005	0	0	0	0	0	0	0		0	0	0	0	0	0	0	0	0	0	0	0	0	0	0	0		0	0	0	0	0	0	0	0	0	0	0	0	0	0	0	0		3	0	0	3	0	0
1891	AC208579.3_FG001	0	0	0	0	0	0	0		0	0	0	0	0	0	0	0	0	0	0	0	0	0	0	0		1	0	0	0	0	0	0	0	0	0	0	0	0	0	0	0		2	3	5	3	3	6
1892	AC208606.3_FG007	0	0	0	0	0	1	0		0	0	0	0	0	0	0	0	1	2	0	3	0	2	0	2		0	1	0	2	1	1	0	0	0	2	0	5	0	1	0	0		1	5	3	3	0	3
1893	AC208610.3_FG010	0	0	0	0	0	0	0		0	0	0	0	0	0	0	0	0	0	0	0	0	0	0	0		0	0	0	0	0	0	0	0	0	0	0	0	0	0	0	0		1	1	0	0	0	0
1894	AC208625.3_FG004	0	0	0	0	0	0	0		0	0	0	0	0	0	0	0	0	0	0	0	0	0	0	0		0	0	0	0	0	0	0	0	0	0	0	0	0	0	0	0		0	0	0	0	0	0
1895	AC208630.3_FG001	0	0	0	0	0	0	0		0	0	0	0	0	0	0	0	0	0	0	0	0	0	0	0		0	0	0	0	0	0	0	0	0	0	0	0	0	0	0	0		0	0	0	0	1	0
1896	AC208641.3_FG009	0	0	0	0	0	0	0		0	0	0	0	0	0	0	0	0	0	0	0	0	0	0	0		0	0	0	0	0	0	0	0	0	0	0	0	0	0	1	0		1	5	0	2	1	3
1897	AC208644.2_FG005	0	0	0	0	0	0	0		0	0	0	0	0	0	0	0	0	0	0	0	0	0	0	0		0	0	0	0	0	0	0	0	0	0	0	0	0	0	0	0		0	0	0	0	0	0
1898	AC208649.4_FG003	0	0	0	0	0	0	0		0	0	0	0	0	0	0	0	0	0	0	0	0	0	0	0		0	0	0	0	0	0	0	0	0	0	0	0	0	0	0	0		0	0	0	1	1	2
1899	AC208663.3_FG002	0	0	0	0	0	0	0		0	0	0	0	0	0	0	0	0	0	0	0	0	0	0	0		0	0	0	0	0	0	0	0	0	0	0	0	0	0	0	0		4	0	3	1	1	1
1900	AC208678.3_FG002	0	0	0	0	0	0	0		0	0	0	0	0	0	0	0	0	0	0	0	0	0	0	0		0	0	0	0	0	0	0	0	0	0	0	0	0	0	0	0		0	0	1	0	0	1
1901	AC208680.3_FG001	0	0	0	0	0	0	0		0	0	0	0	0	0	0	0	0	0	0	0	0	0	0	0		0	0	0	0	0	0	0	0	0	0	0	0	0	0	0	0		0	2	0	0	0	0
1902	AC208702.3_FG007	0	0	0	0	0	0	0		0	0	0	0	0	0	0	0	0	0	0	0	0	0	0	0		0	0	0	0	0	0	0	0	0	0	0	0	0	0	0	0		0	0	0	0	0	0
1903	AC208711.3_FG005	0	0	0	0	0	0	0		0	0	0	0	0	0	0	0	0	0	0	0	0	0	0	0		0	0	0	0	0	0	0	0	0	0	0	0	0	0	0	0		0	1	1	2	0	0
1904	AC208724.3_FG001	0	0	0	0	1	1	1		40	0	24	0	12	0	15	0	1	9	0	5	0	6	0	0		16	12	12	5	6	2	13	6	12	4	31	3	5	1	7	1		199	125	172	71	147	119
1905	AC208826.3_FG003	0	0	0	0	0	0	0		0	0	0	0	0	0	0	0	0	0	0	0	0	0	0	0		0	0	0	0	0	0	0	0	0	0	0	0	0	0	0	0		0	0	0	0	0	0
1906	AC208826.3_FG004	0	0	0	0	0	0	0		0	0	0	0	0	0	0	0	0	1	0	3	0	0	0	1		0	0	0	0	0	1	0	0	0	0	0	0	0	0	0	1		6	2	3	4	7	3
1907	AC208848.3_FG005	0	0	0	0	0	0	0		0	0	0	0	0	0	0	0	0	0	0	0	0	0	0	0		0	0	0	0	0	0	0	0	0	0	0	0	0	0	0	0		2	1	1	0	0	0
1908	AC208855.3_FG002	0	0	0	0	0	0	0		0	0	0	0	0	0	0	0	0	0	0	0	0	0	0	0		0	0	0	0	0	0	2	0	0	0	0	0	0	0	0	0		2	4	1	0	0	0
1909	AC208860.3_FG002	0	0	0	0	0	0	0		0	0	0	0	0	0	0	0	0	0	0	0	0	0	0	0		0	0	0	0	0	0	0	0	0	0	0	0	0	0	0	0		0	0	0	0	1	0
1910	AC208892.3_FG005	0	0	0	0	0	0	0		0	0	1	0	1	0	0	0	0	5	0	3	0	2	1	2		1	0	1	1	1	2	0	2	1	1	0	1	1	0	0	3		4	11	11	7	3	10
1911	AC208895.3_FG001	0	0	0	0	0	0	0		0	0	0	0	0	0	0	0	0	0	0	0	0	0	0	0		0	0	0	0	0	0	0	0	0	0	0	0	0	0	0	0		1	3	1	1	0	2
1912	AC208895.3_FG004	0	0	0	0	0	0	0		0	0	0	0	0	0	0	0	0	0	0	0	0	0	0	0		0	0	0	0	0	0	0	0	0	0	0	0	0	0	0	0		0	1	0	1	0	1
1913	AC208897.3_FG003	0	0	0	0	0	1	0		13	0	25	0	10	0	12	0	0	9	0	5	0	7	0	9		4	6	6	2	5	1	7	2	5	2	11	6	8	4	8	4		38	33	42	36	62	28
1914	AC208897.3_FG004	0	0	0	0	1	1	1		97	1	64	2	81	0	101	1	1	34	0	22	0	47	1	55		39	22	40	9	54	27	58	27	53	26	43	8	43	20	56	23		1027	439	574	723	687	328
1915	AC208905.3_FG004	0	0	0	0	0	0	0		0	0	0	0	0	0	0	0	0	0	0	1	0	0	0	0		0	1	0	0	0	0	0	0	0	1	0	1	0	0	0	1		0	0	2	1	0	1
1916	AC208915.3_FG010	0	0	0	0	0	0	0		0	0	0	0	0	0	0	0	0	0	0	0	0	0	0	0		0	0	0	0	0	0	0	0	0	0	0	0	0	0	0	0		0	0	0	0	0	0
1917	AC208916.3_FG003	0	0	0	0	0	0	0		0	0	1	0	1	0	0	0	0	0	0	1	0	0	0	0		0	0	0	0	0	0	0	0	0	0	1	0	0	1	0	0		4	2	3	2	4	3
1918	AC208920.3_FG001	0	0	0	0	0	0	0		0	0	0	0	0	0	0	0	0	0	0	0	0	0	0	0		0	0	0	0	0	0	0	0	0	0	0	0	0	0	0	0		1	2	0	0	0	0
1919	AC208930.3_FG007	0	0	1	0	0	0	0		0	0	0	0	0	0	0	0	0	0	0	0	0	0	0	0		0	0	0	0	0	0	0	0	0	0	0	0	0	0	0	0		1	12	15	12	0	19
1920	AC208974.3_FG001	0	0	0	0	0	0	0		0	0	0	0	0	0	0	0	0	0	0	0	0	0	0	0		0	0	0	0	0	0	0	0	0	0	0	0	0	0	0	0		0	0	0	0	0	0
1921	AC209015.3_FG004	0	0	0	0	0	0	0		0	0	0	0	0	0	0	0	0	0	0	0	0	0	0	0		0	0	0	0	0	0	0	0	0	0	0	0	0	0	0	0		0	0	0	0	0	0
1922	AC209016.3_FG010	0	0	0	0	0	0	0		0	0	0	0	1	0	1	0	0	0	0	0	0	0	0	0		0	0	1	0	0	0	0	0	2	0	0	0	1	0	0	0		1	2	3	5	1	6
1923	AC209029.2_FG002	0	0	0	0	0	0	0		0	0	0	0	0	0	0	0	0	0	0	0	0	0	0	0		0	0	0	0	0	0	0	0	0	0	0	0	0	0	0	0		0	0	0	0	1	0
1924	AC209050.3_FG001	0	0	0	0	0	0	0		0	0	0	0	0	0	0	0	0	0	0	0	0	0	0	0		1	0	0	0	0	0	0	0	0	0	0	0	1	0	0	0		6	2	9	3	6	2
1925	AC209050.3_FG003	0	0	0	0	1	1	1		7	0	6	0	9	0	8	0	1	3	0	1	0	5	0	16		5	2	5	3	9	8	16	4	8	5	18	11	6	3	5	2		23	13	21	27	18	5
1926	AC209051.3_FG003	0	0	0	0	0	0	0		0	0	0	0	0	0	0	0	0	0	0	0	1	0	1	0		2	0	0	0	0	0	0	0	0	0	0	0	0	0	0	0		1	2	3	1	0	1
1927	AC209062.3_FG002	0	0	0	0	0	0	0		0	0	0	0	0	0	0	0	0	0	0	0	0	0	0	0		0	0	0	0	0	0	0	0	0	0	0	0	0	0	0	0		0	0	0	0	0	0
1928	AC209073.3_FG001	0	0	0	0	0	0	0		0	0	0	0	0	0	0	0	0	0	0	0	0	0	0	0		0	0	0	0	0	0	0	0	0	0	0	0	0	0	0	0		0	0	0	0	0	0
1929	AC209073.3_FG002	0	0	0	0	0	0	0		0	0	0	0	0	0	0	0	0	0	0	0	0	0	0	0		0	0	0	0	0	0	0	0	0	0	0	0	0	0	0	0		0	0	0	1	0	0
1930	AC209074.3_FG007	0	0	0	0	0	0	0		0	0	0	0	0	0	0	0	0	0	0	0	0	0	0	0		0	0	0	0	0	0	0	0	0	0	0	0	0	0	0	0		0	0	0	0	0	0
1931	AC209080.3_FG004	0	0	0	0	0	0	0		0	0	0	0	0	0	0	0	0	0	0	0	0	0	0	0		0	0	0	0	0	0	0	0	0	0	0	0	0	0	0	0		23	7	20	11	23	13
1932	AC209093.3_FG006	0	0	0	0	0	0	0		1	0	0	0	0	0	0	0	0	0	0	0	0	0	0	0		0	0	0	0	0	0	0	0	0	0	0	0	0	0	0	0		3	0	1	1	3	0
1933	AC209168.3_FG007	0	0	0	0	0	0	0		0	0	0	0	0	0	0	0	0	0	0	0	0	0	0	0		0	1	0	0	0	0	0	0	0	0	0	0	0	0	0	0		1	1	1	0	1	0
1934	AC209169.3_FG007	0	0	0	0	0	0	0		0	0	0	0	0	0	0	0	0	0	0	0	0	0	0	0		0	0	0	0	0	0	0	0	0	0	0	0	0	0	0	0		0	0	0	0	0	0
1935	AC209177.3_FG001	0	0	0	0	0	0	0		0	0	0	0	0	0	0	0	0	0	0	0	0	0	0	0		0	0	0	0	0	0	0	0	0	0	0	0	0	0	0	0		0	0	0	1	0	0
1936	AC209206.3_FG004	0	0	0	0	0	0	0		0	0	0	0	0	0	0	0	0	0	0	0	0	1	0	1		0	0	0	0	0	3	0	0	0	0	0	0	0	0	0	0		0	0	0	0	0	0
1937	AC209206.3_FG011	0	0	0	0	0	0	0		5	0	13	0	19	0	19	0	2	23	0	14	1	29	0	28		8	11	16	14	10	15	7	14	11	14	17	16	14	10	14	17		345	360	309	436	300	375
1938	AC209206.3_FG014	0	0	0	0	0	0	0		0	0	0	0	0	0	0	0	1	0	0	0	0	0	0	1		0	0	0	0	0	0	0	0	0	0	0	0	0	0	0	0		2	1	3	1	1	1
1939	AC209208.3_FG001	0	0	0	0	0	1	0		32	0	43	0	23	0	29	2	1	30	0	37	0	33	0	41		16	13	16	16	20	18	21	19	39	24	18	18	28	19	24	19		400	419	380	606	435	438
1940	AC209208.3_FG002	0	0	0	0	0	1	0		42	0	56	0	29	0	49	0	1	50	0	50	0	39	2	51		20	15	20	17	19	13	21	17	26	17	24	16	21	12	30	11		4359	3350	4041	2577	2800	2469
1941	AC209208.3_FG003	0	0	0	0	0	0	0		0	0	0	0	4	0	2	0	0	1	0	1	0	3	0	3		0	2	1	0	2	2	3	1	2	1	0	0	1	0	1	0		23	13	17	18	19	14
1942	AC209208.3_FG004	0	0	0	0	0	0	0		0	0	0	0	0	0	0	0	0	0	0	0	0	0	0	0		0	0	0	0	0	0	0	0	0	0	0	0	0	0	0	0		1	2	2	0	0	0
1943	AC209208.3_FG005	0	0	0	0	0	0	0		16	0	23	0	32	0	30	0	0	19	0	28	0	32	0	40		10	13	13	14	16	21	13	18	13	15	7	11	12	17	17	16		442	492	443	511	460	475
1944	AC209212.3_FG005	0	0	0	0	0	0	0		0	0	0	0	0	0	0	0	0	0	0	0	0	0	0	0		0	0	0	0	0	0	0	0	0	0	0	0	0	0	0	0		2	0	1	2	1	0
1945	AC209213.4_FG002	0	0	0	0	0	0	0		0	0	0	0	0	0	0	0	0	3	0	1	0	0	0	3		0	2	0	1	0	0	0	2	0	1	0	1	0	0	0	0		5	82	53	37	9	72
1946	AC209215.4_FG004	0	0	0	0	0	0	0		0	0	0	0	0	0	0	0	0	0	0	0	0	0	0	0		0	0	0	0	0	0	0	0	0	0	0	0	0	0	0	0		0	0	0	0	0	0
1947	AC209215.4_FG006	0	0	0	0	0	0	0		0	0	0	0	0	0	0	0	0	0	0	0	0	0	0	0		0	0	0	0	0	0	0	0	0	0	0	0	0	0	0	0		2	4	2	1	3	1
1948	AC209242.3_FG003	0	0	0	0	0	0	0		0	0	0	0	0	0	0	0	0	0	0	0	0	0	0	0		0	0	0	0	0	0	0	0	0	0	0	0	0	0	0	0		303	312	265	361	296	300
1949	AC209257.4_FG003	0	0	0	0	0	0	0		5	0	9	0	5	0	13	0	0	2	0	2	1	4	0	3		2	2	1	3	2	0	3	2	0	4	3	0	3	2	2	2		58	14	50	35	81	17
1950	AC209257.4_FG004	0	0	0	0	0	0	0		0	0	0	0	0	0	0	0	0	0	0	0	0	0	0	0		0	0	0	0	0	0	0	0	0	0	0	0	0	0	0	0		0	0	0	0	0	0
1951	AC209257.4_FG006	0	0	0	0	0	0	0		1	0	0	0	1	0	0	1	0	4	1	1	1	4	0	4		0	0	0	0	1	0	0	1	1	0	0	1	1	1	2	2		5	25	3	1	3	13
1952	AC209257.4_FG008	0	0	0	0	0	0	0		20	0	18	0	11	0	15	0	0	2	0	7	0	9	0	6		7	8	3	6	6	3	5	7	6	7	4	4	6	1	7	8		195	149	243	167	192	130
1953	AC209332.3_FG011	0	0	0	0	0	0	0		0	0	0	0	0	0	0	0	0	0	0	0	0	0	0	0		0	0	0	0	0	0	0	0	0	0	0	0	0	0	0	0		38	29	27	36	29	32
1954	AC209356.4_FG001	0	0	0	0	0	0	0		0	0	0	0	0	0	0	0	0	0	0	0	0	0	0	0		0	0	0	0	0	0	0	0	0	0	0	0	0	0	0	0		0	1	0	0	0	0
1955	AC209364.3_FG004	0	0	0	0	0	0	0		0	0	0	0	0	0	0	0	0	0	0	0	0	0	0	0		0	0	0	0	0	0	0	0	0	0	0	0	0	0	0	0		0	2	0	3	0	2
1956	AC209364.3_FG007	0	0	0	0	0	0	0		0	0	0	0	0	0	0	0	0	0	0	0	0	0	0	0		0	0	0	0	0	0	0	0	0	0	0	0	0	0	0	0		0	0	0	2	0	1
1957	AC209364.3_FG009	0	0	0	0	1	1	1		11	0	1	0	10	0	8	0	0	0	0	2	0	2	0	2		1	0	5	2	5	0	2	1	2	1	3	0	3	0	1	1		41	20	26	21	29	22
1958	AC209374.4_FG002	0	0	0	0	1	1	1		20	0	12	0	9	0	11	0	0	9	0	10	1	8	0	8		14	5	8	4	6	5	6	3	6	1	8	8	11	2	8	1		96	46	63	64	81	59
1959	AC209377.3_FG003	0	0	0	0	0	0	0		2	0	0	0	7	0	5	0	0	1	0	0	0	10	0	4		3	2	0	1	2	5	5	6	1	1	1	1	2	3	1	3		74	16	51	71	52	32
1960	AC209381.3_FG002	0	0	0	0	0	0	0		0	0	0	0	0	0	0	0	0	0	0	0	0	0	0	0		0	0	0	0	0	0	0	0	0	0	0	0	0	0	0	0		0	0	0	0	0	0
1961	AC209381.3_FG007	0	0	0	0	0	0	0		0	0	0	0	0	0	0	0	0	0	0	0	0	0	0	0		0	0	0	0	0	0	0	0	0	0	0	0	0	0	0	0		0	0	1	0	0	0
1962	AC209438.4_FG002	0	0	0	0	0	0	0		0	0	0	0	0	0	0	0	0	0	0	0	0	0	0	0		1	0	0	0	0	0	0	0	0	0	0	0	0	0	0	0		0	1	2	0	0	0
1963	AC209460.3_FG002	0	0	0	0	0	0	0		9	0	14	0	9	0	9	0	2	12	0	13	0	11	0	12		4	5	8	4	8	4	3	5	9	4	7	8	8	3	2	14		103	138	131	153	120	125
1964	AC209463.4_FG013	0	0	0	0	0	0	0		0	0	0	0	0	0	0	0	0	0	0	0	0	0	0	0		0	0	0	0	0	0	0	0	0	0	0	0	0	0	0	0		0	0	2	1	0	1
1965	AC209624.2_FG001	0	0	0	0	0	0	0		0	0	0	0	0	0	1	0	0	2	0	0	0	0	0	1		0	1	0	0	1	0	0	0	0	0	0	0	0	0	0	0		2	10	7	6	3	10
1966	AC209624.2_FG003	0	0	0	0	0	0	0		0	0	0	0	0	0	1	0	0	0	0	0	0	0	0	0		0	0	0	0	0	0	0	0	0	0	0	0	0	0	0	1		0	0	0	0	1	0
1967	AC209626.2_FG013	0	0	0	0	1	0	0		10	0	8	0	16	0	15	0	0	7	1	12	0	18	0	16		7	2	2	1	12	11	15	6	8	5	0	2	6	6	11	9		34	32	23	51	44	40
1968	AC209629.2_FG003	0	0	0	0	0	0	0		0	0	0	0	0	0	1	0	0	0	0	0	0	0	0	0		0	0	0	0	0	0	0	0	0	0	0	0	1	0	0	0		0	0	0	2	0	2
1969	AC209629.2_FG007	0	0	0	0	0	0	0		0	0	0	0	0	0	1	0	0	0	0	0	1	0	0	0		0	0	0	0	0	0	0	0	1	0	0	0	0	0	0	0		1	0	0	3	0	1
1970	AC209636.2_FG003	0	0	0	0	0	0	0		0	0	0	0	3	0	1	0	0	0	0	1	0	5	0	3		0	3	1	1	1	2	3	2	1	0	1	1	4	1	1	2		18	23	21	19	12	15
1971	AC209647.2_FG001	0	0	0	0	0	0	0		0	0	0	0	0	0	0	0	0	0	0	0	0	0	0	0		0	0	0	0	0	0	0	0	0	0	0	0	0	0	0	0		0	0	0	0	0	0
1972	AC209647.2_FG002	0	0	0	0	0	0	0		0	0	0	0	0	0	0	0	0	0	0	0	0	0	0	0		0	0	0	0	0	0	0	0	0	0	0	0	0	0	0	0		0	0	0	0	0	0
1973	AC209651.2_FG001	0	0	0	0	0	0	0		0	0	0	0	0	0	0	0	0	0	0	0	0	0	0	0		0	0	0	0	0	0	0	0	0	0	0	0	0	0	0	0		0	0	1	0	0	0
1974	AC209664.3_FG002	0	0	0	0	0	0	0		128	0	118	0	125	1	140	0	3	108	0	93	2	114	1	130		72	56	66	57	58	72	89	93	62	76	66	69	68	58	69	72		638	585	711	582	598	507
1975	AC209675.3_FG001	0	0	0	0	0	0	0		0	0	0	0	0	0	0	0	0	2	0	1	0	0	0	0		0	0	0	1	0	0	0	0	0	0	0	0	0	0	0	0		0	3	1	0	0	1
1976	AC209697.3_FG005	0	0	0	0	0	0	0		0	0	0	0	0	0	0	0	0	0	0	0	0	0	0	0		0	0	0	0	0	0	0	0	0	0	0	0	0	0	0	0		2	0	0	0	0	0
1977	AC209698.3_FG004	0	0	0	0	0	0	0		0	0	0	0	0	0	0	0	0	0	0	0	0	0	0	0		0	0	0	0	0	0	0	0	0	0	0	0	0	0	0	0		0	0	0	0	0	0
1978	AC209704.3_FG003	0	0	0	0	0	0	0		0	0	0	0	0	0	0	0	0	0	0	0	0	0	0	0		0	0	0	0	0	0	0	0	0	0	0	0	0	0	0	0		1	2	2	3	2	2
1979	AC209705.3_FG004	0	0	0	0	0	0	0		12	1	10	0	2	0	1	0	0	7	0	12	0	1	0	2		10	8	14	8	0	1	1	0	1	1	8	10	0	1	1	1		707	678	612	674	566	593
1980	AC209710.4_FG002	0	0	0	0	0	0	0		0	0	0	0	0	0	0	0	0	0	0	0	0	0	0	0		0	0	0	0	0	0	0	0	0	0	0	0	0	0	0	0		1	4	1	1	1	1
1981	AC209718.1_FG009	0	0	0	0	1	1	1		18	1	11	1	9	0	14	0	0	8	0	9	0	5	1	9		7	4	7	4	11	4	10	5	7	0	3	2	9	3	8	2		37	18	36	32	44	20
1982	AC209723.3_FG003	0	0	0	0	0	0	0		0	0	0	0	0	0	0	0	0	0	0	0	0	0	0	0		0	0	0	0	0	0	0	0	0	0	0	0	0	0	0	0		0	1	0	0	1	2
1983	AC209723.3_FG004	0	0	0	0	0	0	0		0	0	0	0	0	0	0	0	1	1	1	0	0	0	0	0		0	0	0	0	0	0	0	0	0	0	0	0	0	0	0	0		0	3	1	1	1	1
1984	AC209729.3_FG003	0	0	0	0	0	0	0		1	0	0	0	0	0	0	0	0	0	0	0	0	0	0	0		0	0	0	0	0	0	0	0	0	0	0	0	0	0	0	0		2	4	3	1	1	0
1985	AC209732.3_FG001	0	0	0	0	0	0	0		0	0	0	0	1	0	1	0	0	0	0	0	0	0	0	0		1	0	0	0	0	0	0	0	0	0	1	0	0	0	0	0		5	3	5	6	4	8
1986	AC209734.3_FG005	0	0	0	0	0	0	0		0	0	0	0	0	0	0	0	0	0	0	0	0	0	0	0		0	0	0	0	0	0	0	0	0	0	0	0	0	0	0	0		0	0	0	0	0	0
1987	AC209737.3_FG006	0	0	1	0	0	0	0		0	0	0	0	0	0	0	0	0	0	0	0	0	3	0	0		0	0	0	0	0	1	0	2	0	0	0	0	0	0	0	1		0	1	2	4	0	4
1988	AC209738.3_FG005	0	0	0	0	0	0	0		0	0	0	0	0	0	0	0	0	0	0	0	0	0	0	0		0	0	0	0	0	0	0	0	0	0	0	0	0	0	0	0		1	0	1	3	2	1
1989	AC209739.3_FG003	0	0	0	0	0	0	0		1	1	1	1	0	0	0	0	0	0	0	0	0	0	0	0		1	0	1	0	0	0	0	0	1	0	1	1	0	0	2	0		8	1	5	2	4	2
1990	AC209744.3_FG001	0	0	0	0	0	0	0		0	0	0	0	0	0	0	0	0	0	0	0	0	0	0	0		0	0	0	0	0	0	0	0	0	0	0	0	0	0	0	0		3	3	1	4	1	1
1991	AC209755.3_FG001	0	0	0	0	0	0	0		0	0	0	0	0	0	0	0	0	0	0	0	0	0	0	0		0	0	0	0	0	0	0	0	0	0	0	0	0	0	0	0		0	0	0	0	0	1
1992	AC209768.3_FG005	0	0	0	0	0	0	0		0	0	0	0	0	0	0	0	0	0	0	0	0	0	0	0		0	0	0	0	0	0	0	0	1	0	0	0	0	0	0	0		0	1	1	3	2	0
1993	AC209768.3_FG016	0	0	0	0	0	0	0		6	0	2	0	8	0	2	0	0	0	0	1	0	8	0	3		2	1	0	0	5	5	2	9	4	2	0	1	1	2	1	3		46	6	36	44	37	14
1994	AC209778.3_FG002	0	0	0	0	0	0	0		0	0	0	0	0	0	0	0	0	0	0	0	0	0	0	0		0	0	0	0	0	0	0	0	0	0	0	0	0	0	0	0		2	1	0	1	0	0
1995	AC209780.2_FG003	0	0	0	0	0	0	0		0	0	0	0	0	0	0	0	0	0	0	0	0	0	0	0		0	0	0	0	0	0	0	0	0	0	0	0	0	0	0	0		1	1	1	0	0	0
1996	AC209784.3_FG007	0	0	0	0	0	0	0		0	0	0	0	6	0	2	0	0	2	0	3	0	5	0	12		0	1	0	0	0	0	1	0	0	0	0	0	1	0	2	0		59	148	42	32	36	247
1997	AC209784.3_FG011	0	0	0	0	1	0	0		2	0	0	1	2	0	1	0	0	3	0	2	0	4	1	2		0	2	0	0	1	2	0	4	2	1	0	0	0	0	0	0		7	9	7	9	7	16
1998	AC209810.3_FG002	0	0	0	0	0	0	0		0	0	1	0	0	0	0	0	0	0	0	0	0	0	0	0		1	0	0	0	0	0	0	0	0	0	0	0	0	0	1	0		2	4	2	1	2	1
[truncated: 37,659 more rows]
[truncated: 20 more columns]
