# Supplementary figures and images for: Complementation contributes to transcriptome complexity in maize (Zea mays L.) hybrids relative to their inbred parents
Source: HighWire-hosted journal article supplement (doi:10.1101/gr.138461.112), 2012-10-19

## Frequency of maximum read count of differentially expressed genes

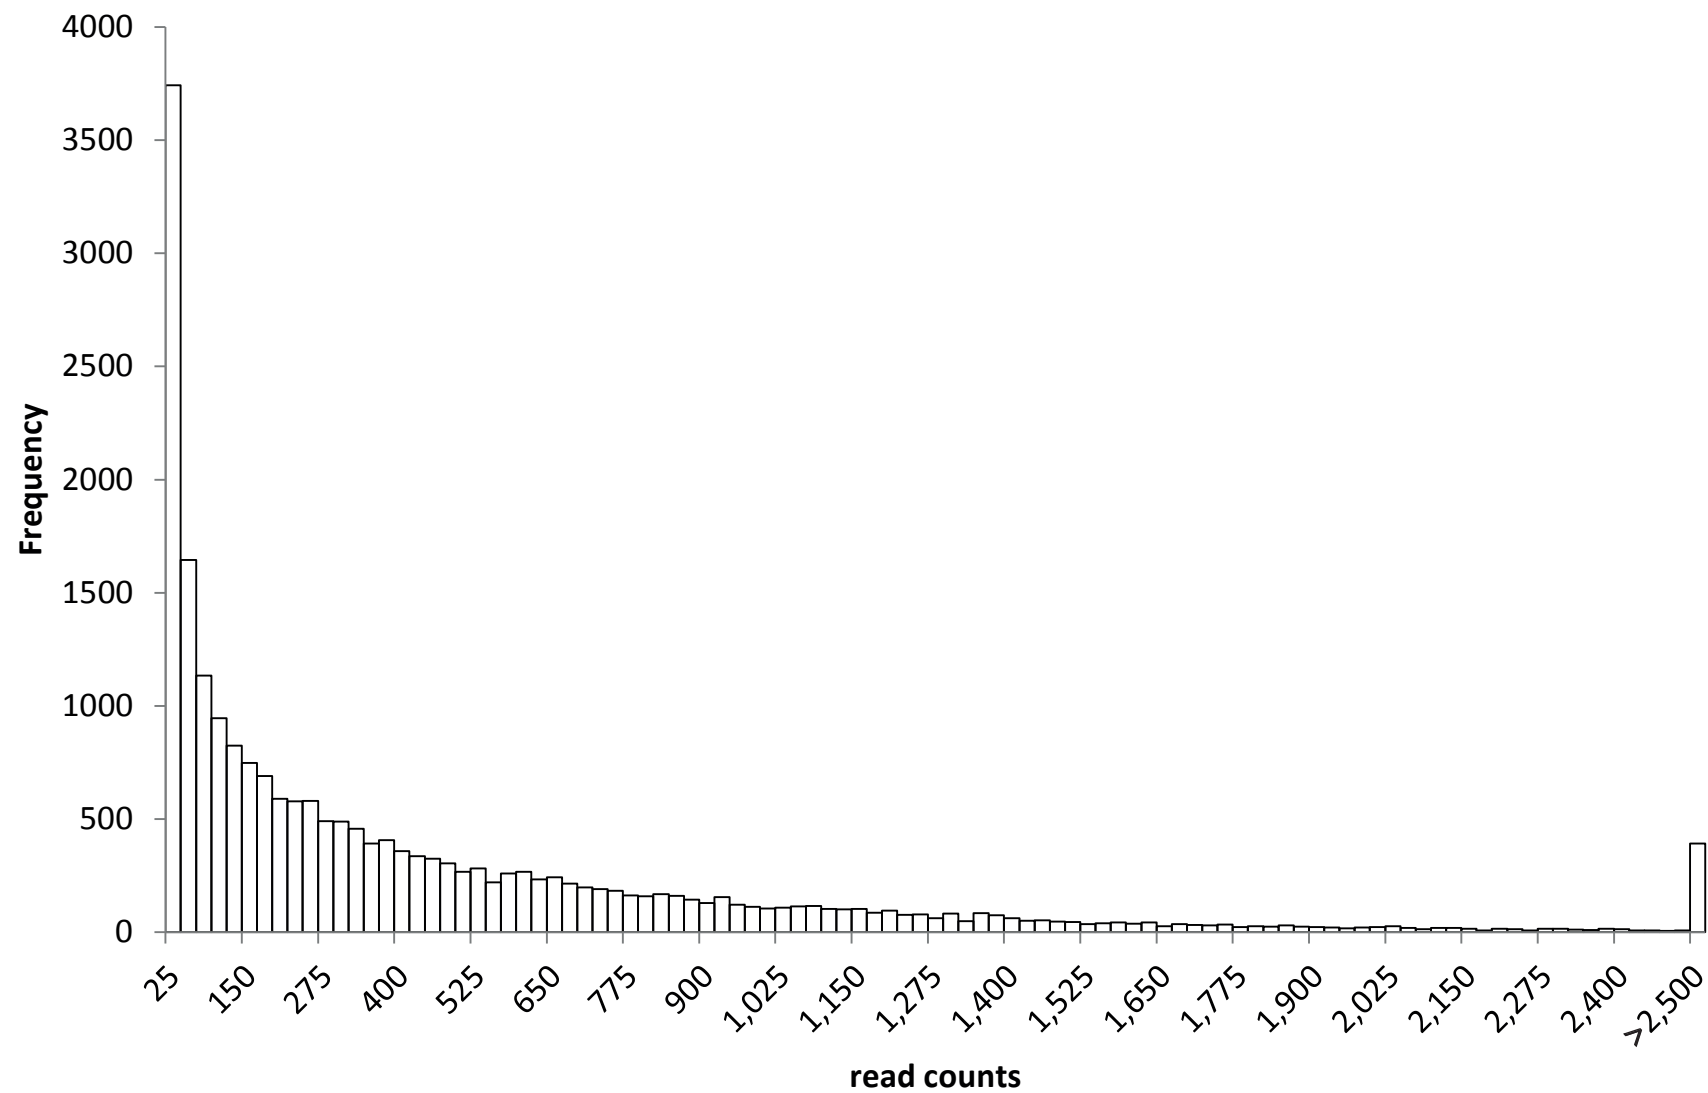

Supplement: FigS1.pdf [file FigS1.pdf]
